# Supplementary material for: Drug targeting Nsp1-ribosomal complex shows antiviral activity against SARS-CoV-2
Source: eLife journal article supplement (doi:10.7554/elife.74877), 2022-03-24
Supplement: supp [file Figure 1 source data 1_BLI screening.xlsx]

## Sheet: Nsp1_screening
	Replica1	Replica2
Cloxacillin	0.07	0.02
Perindoprin	-0.08	-0.02
Montelukast	0.6	0.53
Saquinavir	0.21	0.15
Bosentan	0	0.06
Dopexamine	0	-0.06
Nicardipin	0.01	0.08
Lidoflazine	0.032	0.09
Dorpenem	-0.01	-0.08
Mupirocin	0.03	0.09
Verapmil	0.03	0.08
Formoterol	0.036	0.08

## Sheet: Nsp1_Del40_screening
	Replica1	Replica2
Cloxacillin	0.01	0.04
Perindoprin	-0.06	-0.01
Montelukast	0.02	0.06
Saquinavir	0.01	0.04
Bosentan	0.004	0.08
Dopexamine	0.03	-0.06
Nicardipin	0.04	0.1
Lidoflazine	0.032	0.01
Dorpenem	-0.01	-0.1
Mupirocin	0.03	0.2
Verapmil	0.03	0.2
Formoterol	0.036	0.1
