# Supplementary material for: Drug targeting Nsp1-ribosomal complex shows antiviral activity against SARS-CoV-2
Source: eLife journal article supplement (doi:10.7554/elife.74877), 2022-03-24
Supplement: supp [file Figure 1 source data 2_BLI Kinetics.xlsx]

## Sheet: Montelukast
	0 uM		1.75 uM		3.125 uM		6.25 uM		12.5 uM		25 uM
Time	RU	Fit	RU	Fit	RU	Fit	RU	Fit	RU	Fit	RU	Fit						Steady state kinetics
0.2	0.000216	0	-0.0358	0	-0.0072	0	-0.00499	0	-0.00731	0	0.001607	0
0.4	0.000214	0	-0.03603	0.000934	-0.009	0.001571	-0.0064	0.002472	-0.00801	0.003198	0.000321	0.003336					Drug concentration	Replica1	Replica2	Replica3
0.6	0.000207	0	-0.03638	0.001864	-0.01074	0.003137	-0.00822	0.004935	-0.00845	0.006385	-0.00065	0.00666					0	0	0	0
0.8	0.000201	0	-0.03589	0.002789	-0.01271	0.004696	-0.00957	0.00739	-0.00849	0.00956	-0.00182	0.009974					1.56	0.218	0.178	0.248
1	0.0002	0	-0.03577	0.003711	-0.01487	0.00625	-0.01113	0.009836	-0.00922	0.012723	-0.00303	0.013276					3.12	0.4191	0.3491	0.3791
1.2	0.000195	0	-0.03614	0.004629	-0.01708	0.007797	-0.0124	0.012274	-0.00963	0.015875	-0.00394	0.016568					6.25	0.7152	0.65152	0.7552
1.4	0.000192	0	-0.03631	0.005543	-0.01902	0.009339	-0.01368	0.014703	-0.00971	0.019016	-0.00524	0.019848					12.5	0.8738	0.9338	0.8238
1.6	0.000194	0	-0.03782	0.006453	-0.02091	0.010876	-0.01459	0.017124	-0.00938	0.022144	-0.00629	0.023117					25	0.9928	0.9428	1.118
1.8	0.000192	0	-0.03862	0.007359	-0.02252	0.012406	-0.01532	0.019537	-0.00912	0.025262	-0.00651	0.026375
2	0.00019	0	-0.03944	0.008262	-0.02331	0.013931	-0.0153	0.021941	-0.00844	0.028368	-0.0064	0.029622
2.2	0.000195	0	-0.04011	0.00916	-0.02417	0.01545	-0.01472	0.024337	-0.00698	0.031462	-0.0053	0.032859
2.4	0.000197	0	-0.04048	0.010055	-0.02414	0.016963	-0.01325	0.026725	-0.00509	0.034545	-0.0035	0.036084
2.6	0.000197	0	-0.04076	0.010945	-0.02376	0.018471	-0.01233	0.029105	-0.00358	0.037617	-0.00159	0.039299
2.8	0.000197	0	-0.04069	0.011832	-0.02309	0.019973	-0.01042	0.031476	-0.00145	0.040678	0.000522	0.042502
3	0.000199	0	-0.03974	0.012715	-0.02163	0.021469	-0.00828	0.033839	0.00062	0.043728	0.002964	0.045696
3.2	0.000194	0	-0.03856	0.013595	-0.02125	0.02296	-0.00651	0.036194	0.0028	0.046766	0.006308	0.048878
3.4	0.000194	0	-0.03734	0.01447	-0.01889	0.024445	-0.00433	0.03854	0.00513	0.049793	0.009055	0.052049
3.6	0.000195	0	-0.03697	0.015342	-0.01708	0.025925	-0.00272	0.040879	0.00737	0.052809	0.011953	0.05521
3.8	0.000195	0	-0.03593	0.01621	-0.01593	0.027399	-0.00062	0.04321	0.0106	0.055814	0.016025	0.058361
4	0.000194	0	-0.03411	0.017074	-0.01497	0.028867	0.002155	0.045532	0.01335	0.058808	0.019379	0.061501
4.2	0.000195	0	-0.03325	0.017935	-0.01317	0.03033	0.005178	0.047847	0.01643	0.061792	0.023123	0.06463
4.4	0.000192	0	-0.03227	0.018792	-0.01045	0.031788	0.007552	0.050153	0.01941	0.064764	0.027008	0.067748
4.6	0.000187	0	-0.03072	0.019645	-0.00866	0.03324	0.009843	0.052452	0.02273	0.067725	0.03106	0.070857
4.8	0.000191	0	-0.02882	0.020495	-0.00657	0.034686	0.012407	0.054742	0.02581	0.070676	0.03483	0.073954
5	0.000191	0	-0.02753	0.021341	-0.00466	0.036127	0.014943	0.057025	0.02887	0.073615	0.038288	0.077042
5.2	0.000188	0	-0.0264	0.022183	-0.00314	0.037563	0.017718	0.0593	0.03255	0.076544	0.041844	0.080119
5.4	0.000193	0	-0.0254	0.023022	-0.00113	0.038994	0.019522	0.061566	0.03589	0.079463	0.044832	0.083185
5.6	0.000196	0	-0.02507	0.023857	0.000585	0.040419	0.021952	0.063825	0.03923	0.08237	0.047967	0.086242
5.8	0.000191	0	-0.023	0.024689	0.002608	0.041838	0.024241	0.066077	0.04253	0.085267	0.050855	0.089288
6	0.000196	0	-0.02182	0.025517	0.004221	0.043253	0.026699	0.06832	0.04605	0.088153	0.05395	0.092324
6.2	0.000197	0	-0.01986	0.026342	0.006545	0.044662	0.02963	0.070556	0.04966	0.091029	0.057652	0.095349
6.4	0.000193	0	-0.01888	0.027162	0.008331	0.046065	0.031938	0.072784	0.0534	0.093894	0.061047	0.098365
6.6	0.000195	0	-0.01775	0.02798	0.010385	0.047464	0.034617	0.075004	0.05705	0.096749	0.064782	0.10137
6.8	0.000195	0	-0.01625	0.028794	0.013304	0.048857	0.037436	0.077217	0.06047	0.099593	0.06747	0.104365
7	0.000193	0	-0.01514	0.029604	0.015326	0.050245	0.040686	0.079422	0.0637	0.102427	0.070458	0.107351
7.2	0.000194	0	-0.01396	0.030411	0.017127	0.051628	0.043433	0.081619	0.06679	0.105251	0.073977	0.110326
7.4	0.000196	0	-0.01302	0.031215	0.019555	0.053006	0.046564	0.083809	0.06967	0.108064	0.076543	0.113291
7.6	0.000191	0	-0.01189	0.032015	0.02102	0.054378	0.049325	0.085991	0.07275	0.110867	0.079755	0.116246
7.8	0.000193	0	-0.01015	0.032812	0.02265	0.055746	0.052517	0.088166	0.07602	0.113659	0.083268	0.119191
8	0.000194	0	-0.00957	0.033605	0.024656	0.057108	0.054849	0.090333	0.07859	0.116442	0.086571	0.122127
8.2	0.000192	0	-0.00853	0.034395	0.027085	0.058465	0.057337	0.092492	0.0819	0.119214	0.090206	0.125052
8.4	0.000192	0	-0.00707	0.035181	0.029653	0.059817	0.060099	0.094645	0.08435	0.121976	0.093528	0.127968
8.6	0.000194	0	-0.00621	0.035964	0.030866	0.061164	0.062818	0.096789	0.08732	0.124728	0.09762	0.130874
8.8	0.000196	0	-0.00484	0.036744	0.033143	0.062506	0.065826	0.098927	0.09071	0.12747	0.100975	0.13377
9	0.000193	0	-0.0037	0.03752	0.034857	0.063843	0.069177	0.101057	0.09457	0.130201	0.10438	0.136656
9.2	0.000196	0	-0.00246	0.038294	0.036981	0.065175	0.072025	0.103179	0.0982	0.132923	0.107424	0.139533
9.4	0.000196	0	-0.00073	0.039063	0.038735	0.066501	0.073844	0.105294	0.10099	0.135635	0.110617	0.1424
9.6	0.000196	0	0.001624	0.03983	0.040344	0.067823	0.077017	0.107402	0.10448	0.138337	0.113488	0.145257
9.8	0.000197	0	0.002992	0.040593	0.04253	0.06914	0.079943	0.109503	0.10803	0.141029	0.116133	0.148105
10	0.0002	0	0.003842	0.041353	0.044313	0.070452	0.082519	0.111596	0.11113	0.143711	0.119298	0.150943
10.2	0.000197	0	0.005923	0.04211	0.046829	0.071759	0.086196	0.113682	0.11435	0.146384	0.122698	0.153772
10.4	0.000199	0	0.006358	0.042863	0.047594	0.073062	0.088856	0.115761	0.11821	0.149046	0.126676	0.156591
10.6	0.000197	0	0.009014	0.043613	0.049569	0.074359	0.092096	0.117833	0.12168	0.151699	0.130239	0.159401
10.8	0.000191	0	0.011088	0.04436	0.051338	0.075651	0.094789	0.119898	0.12491	0.154342	0.133054	0.162201
11	0.000193	0	0.012326	0.045104	0.052198	0.076939	0.097293	0.121955	0.12812	0.156976	0.136235	0.164992
11.2	0.000195	0	0.013321	0.045845	0.05377	0.078222	0.099426	0.124006	0.13117	0.1596	0.140048	0.167773
11.4	0.000193	0	0.015062	0.046582	0.055739	0.0795	0.10187	0.126049	0.13379	0.162214	0.143302	0.170546
11.6	0.000192	0	0.016311	0.047316	0.057336	0.080773	0.104572	0.128085	0.13665	0.164819	0.147046	0.173308
11.8	0.00019	0	0.018543	0.048047	0.060039	0.082041	0.10664	0.130114	0.13949	0.167414	0.149762	0.176062
12	0.000183	0	0.019864	0.048775	0.062051	0.083305	0.108118	0.132136	0.1424	0.169999	0.153541	0.178806
12.2	0.000184	0	0.021065	0.0495	0.064061	0.084564	0.109767	0.134151	0.14549	0.172575	0.15677	0.181541
12.4	0.000182	0	0.021955	0.050222	0.066211	0.085818	0.112058	0.13616	0.14759	0.175142	0.16006	0.184267
12.6	0.000178	0	0.023598	0.050941	0.0671	0.087067	0.113537	0.138161	0.15046	0.1777	0.163844	0.186984
12.8	0.000178	0	0.024977	0.051656	0.069355	0.088312	0.116264	0.140155	0.1527	0.180247	0.166837	0.189691
13	0.000179	0	0.025733	0.052369	0.071663	0.089552	0.11835	0.142143	0.15519	0.182786	0.170521	0.19239
13.2	0.000178	0	0.027133	0.053078	0.074055	0.090788	0.120339	0.144123	0.15771	0.185316	0.173632	0.195079
13.4	0.00018	0	0.028543	0.053785	0.075839	0.092018	0.121725	0.146097	0.15981	0.187836	0.17746	0.19776
13.6	0.000182	0	0.029253	0.054488	0.078218	0.093245	0.12531	0.148064	0.16213	0.190346	0.180348	0.200431
13.8	0.000182	0	0.029262	0.055189	0.08017	0.094466	0.127969	0.150024	0.16441	0.192848	0.182866	0.203093
14	0.000183	0	0.030247	0.055886	0.081457	0.095683	0.130555	0.151977	0.16698	0.195341	0.185363	0.205747
14.2	0.000186	0	0.031207	0.05658	0.082413	0.096896	0.133867	0.153924	0.16973	0.197824	0.188284	0.208391
14.4	0.000185	0	0.031937	0.057272	0.083062	0.098104	0.13676	0.155864	0.1727	0.200298	0.191528	0.211027
14.6	0.000185	0	0.034495	0.05796	0.084809	0.099307	0.139404	0.157797	0.1755	0.202764	0.194185	0.213654
14.8	0.000187	0	0.034713	0.058646	0.086852	0.100506	0.141851	0.159723	0.17794	0.20522	0.196706	0.216272
15	0.000187	0	0.035471	0.059328	0.088497	0.1017	0.143887	0.161643	0.18046	0.207667	0.199615	0.218881
15.2	0.000188	0	0.036393	0.060008	0.090461	0.10289	0.146032	0.163556	0.18236	0.210106	0.202467	0.221481
15.4	0.000191	0	0.037734	0.060685	0.092344	0.104076	0.148291	0.165463	0.18516	0.212535	0.20493	0.224073
15.6	0.00019	0	0.037967	0.061359	0.093914	0.105257	0.151042	0.167363	0.18818	0.214955	0.207444	0.226656
15.8	0.000186	0	0.039374	0.06203	0.095533	0.106433	0.152403	0.169256	0.19065	0.217367	0.209225	0.22923
16	0.000187	0	0.040414	0.062698	0.095975	0.107606	0.153525	0.171143	0.19348	0.21977	0.212917	0.231796
16.2	0.000187	0	0.04064	0.063363	0.097439	0.108773	0.155011	0.173024	0.19616	0.222164	0.215359	0.234353
16.4	0.000183	0	0.042075	0.064025	0.099182	0.109937	0.156797	0.174897	0.19811	0.224549	0.217755	0.236901
16.6	0.000185	0	0.042665	0.064685	0.100208	0.111096	0.158952	0.176765	0.20033	0.226926	0.220644	0.239441
16.8	0.000188	0	0.043653	0.065342	0.10214	0.11225	0.161247	0.178626	0.20241	0.229293	0.223293	0.241972
17	0.000185	0	0.044988	0.065996	0.103965	0.113401	0.162652	0.18048	0.20535	0.231652	0.225879	0.244495
17.2	0.000187	0	0.045879	0.066647	0.105715	0.114547	0.16445	0.182328	0.20772	0.234003	0.228706	0.24701
17.4	0.00019	0	0.046473	0.067295	0.107242	0.115689	0.166357	0.18417	0.21	0.236345	0.23089	0.249516
17.6	0.000185	0	0.047906	0.067941	0.108394	0.116826	0.16965	0.186005	0.21205	0.238678	0.233233	0.252013
17.8	0.000186	0	0.049759	0.068583	0.109472	0.117959	0.172056	0.187834	0.21415	0.241003	0.23535	0.254502
18	0.000186	0	0.050492	0.069223	0.11038	0.119088	0.175051	0.189657	0.21658	0.243319	0.237993	0.256983
18.2	0.000184	0	0.052066	0.069861	0.111351	0.120213	0.17774	0.191473	0.2189	0.245627	0.240891	0.259455
18.4	0.000181	0	0.053323	0.070495	0.11276	0.121334	0.1807	0.193283	0.22174	0.247926	0.244325	0.261919
18.6	0.000183	0	0.054903	0.071127	0.114698	0.12245	0.18279	0.195087	0.22466	0.250217	0.24739	0.264375
18.8	0.00018	0	0.055032	0.071756	0.116046	0.123562	0.184652	0.196885	0.22664	0.2525	0.249858	0.266823
19	0.000182	0	0.056735	0.072383	0.117483	0.12467	0.186598	0.198676	0.22953	0.254774	0.253082	0.269262
19.2	0.000184	0	0.057611	0.073006	0.11912	0.125774	0.187973	0.200461	0.23264	0.25704	0.256256	0.271693
19.4	0.000185	0	0.058336	0.073627	0.120432	0.126873	0.189191	0.20224	0.2363	0.259298	0.25878	0.274116
19.6	0.000183	0	0.059318	0.074246	0.121312	0.127969	0.190568	0.204013	0.23859	0.261547	0.261154	0.276531
19.8	0.000185	0	0.060059	0.074862	0.122561	0.12906	0.191883	0.20578	0.24124	0.263788	0.263705	0.278937
20	0.000186	0	0.060755	0.075475	0.123911	0.130148	0.193532	0.207541	0.24412	0.266021	0.266907	0.281336
20.2	0.000185	0	0.061927	0.076085	0.125987	0.131231	0.195414	0.209295	0.24645	0.268246	0.26933	0.283727
20.4	0.000187	0	0.063094	0.076693	0.127429	0.13231	0.196812	0.211044	0.24889	0.270462	0.271368	0.286109
20.6	0.000186	0	0.063858	0.077299	0.12851	0.133385	0.198677	0.212786	0.25151	0.272671	0.273733	0.288484
20.8	0.000184	0	0.066279	0.077901	0.130503	0.134456	0.19999	0.214523	0.25377	0.274871	0.275954	0.29085
21	0.000184	0	0.067205	0.078501	0.132022	0.135523	0.201567	0.216253	0.25599	0.277063	0.278871	0.293209
21.2	0.000188	0	0.067186	0.079099	0.133564	0.136587	0.20382	0.217977	0.25755	0.279248	0.281401	0.295559
21.4	0.000185	0	0.067508	0.079694	0.134661	0.137646	0.205757	0.219696	0.2594	0.281424	0.282999	0.297902
21.6	0.000182	0	0.068373	0.080286	0.136371	0.138701	0.208405	0.221409	0.26072	0.283592	0.285497	0.300237
21.8	0.000183	0	0.069029	0.080876	0.137772	0.139752	0.21066	0.223115	0.26269	0.285753	0.287798	0.302564
22	0.000175	0	0.069293	0.081464	0.138457	0.140799	0.212639	0.224816	0.26536	0.287905	0.290224	0.304883
22.2	0.000176	0	0.070452	0.082048	0.140022	0.141843	0.214768	0.226511	0.26778	0.29005	0.292614	0.307195
22.4	0.000177	0	0.069799	0.082631	0.141431	0.142882	0.216587	0.2282	0.27015	0.292187	0.295483	0.309498
22.6	0.000176	0	0.070583	0.083211	0.142202	0.143918	0.218022	0.229883	0.27162	0.294316	0.29745	0.311794
22.8	0.000173	0	0.07082	0.083788	0.142838	0.144949	0.219949	0.23156	0.27334	0.296437	0.299925	0.314083
23	0.000176	0	0.070895	0.084363	0.144573	0.145977	0.221128	0.233232	0.27591	0.29855	0.302377	0.316363
23.2	0.000173	0	0.07099	0.084935	0.146032	0.147001	0.222069	0.234898	0.27834	0.300656	0.304777	0.318636
23.4	0.000174	0	0.072078	0.085505	0.147345	0.148021	0.223071	0.236558	0.28004	0.302754	0.306517	0.320901
23.6	0.000176	0	0.072212	0.086073	0.148703	0.149037	0.224506	0.238212	0.28174	0.304844	0.309249	0.323159
23.8	0.000175	0	0.072654	0.086638	0.150751	0.15005	0.226199	0.23986	0.28345	0.306927	0.311978	0.325409
24	0.000173	0	0.074054	0.087201	0.151538	0.151058	0.228258	0.241503	0.28443	0.309002	0.315463	0.327651
24.2	0.000174	0	0.075299	0.087761	0.152573	0.152063	0.229608	0.24314	0.28618	0.311069	0.31806	0.329886
24.4	0.000173	0	0.075909	0.088319	0.153686	0.153064	0.231551	0.244772	0.28823	0.313129	0.320209	0.332114
24.6	0.000167	0	0.077088	0.088874	0.15472	0.154061	0.233613	0.246398	0.28974	0.315181	0.322844	0.334334
24.8	0.000169	0	0.078418	0.089427	0.155738	0.155055	0.235335	0.248018	0.29114	0.317226	0.325403	0.336546
25	0.00017	0	0.079164	0.089978	0.156746	0.156045	0.237289	0.249633	0.29322	0.319263	0.327884	0.338751
25.2	0.000169	0	0.080703	0.090527	0.157829	0.157031	0.239844	0.251242	0.29531	0.321293	0.329041	0.340949
25.4	0.000171	0	0.081618	0.091073	0.158683	0.158014	0.241592	0.252845	0.29767	0.323315	0.330722	0.343139
25.6	0.000175	0	0.082978	0.091616	0.159817	0.158992	0.244051	0.254443	0.29958	0.32533	0.332795	0.345322
25.8	0.000175	0	0.084919	0.092158	0.160173	0.159967	0.24559	0.256036	0.30254	0.327338	0.334539	0.347497
26	0.000176	0	0.086208	0.092697	0.160502	0.160939	0.247544	0.257623	0.30456	0.329338	0.336749	0.349666
26.2	0.000181	0	0.087139	0.093234	0.161475	0.161907	0.249639	0.259204	0.30609	0.331331	0.339124	0.351827
26.4	0.000179	0	0.087546	0.093768	0.162489	0.162871	0.250948	0.26078	0.30779	0.333317	0.340936	0.35398
26.6	0.000183	0	0.088573	0.0943	0.163109	0.163831	0.252713	0.262351	0.31032	0.335295	0.342376	0.356127
26.8	0.000187	0	0.089055	0.09483	0.164589	0.164788	0.254473	0.263916	0.31358	0.337267	0.344319	0.358266
27	0.00019	0	0.089811	0.095358	0.166098	0.165742	0.255018	0.265476	0.31552	0.33923	0.345265	0.360398
27.2	0.000192	0	0.090191	0.095883	0.167211	0.166692	0.256292	0.26703	0.31766	0.341187	0.347624	0.362523
27.4	0.000193	0	0.090589	0.096406	0.169085	0.167638	0.257294	0.268579	0.31945	0.343137	0.349895	0.364641
27.6	0.000191	0	0.091002	0.096927	0.170236	0.168581	0.25913	0.270122	0.322	0.345079	0.352469	0.366751
27.8	0.000189	0	0.09179	0.097446	0.171564	0.16952	0.260351	0.271661	0.32306	0.347015	0.355048	0.368855
28	0.000189	0	0.091348	0.097962	0.172433	0.170455	0.262536	0.273194	0.32499	0.348943	0.357768	0.370951
28.2	0.000184	0	0.091416	0.098476	0.173716	0.171387	0.263644	0.274721	0.32696	0.350864	0.359223	0.373041
28.4	0.000178	0	0.091848	0.098988	0.174768	0.172316	0.265653	0.276244	0.32876	0.352778	0.36151	0.375123
28.6	0.000176	0	0.091877	0.099498	0.175559	0.173241	0.267076	0.277761	0.32994	0.354685	0.364026	0.377199
28.8	0.000175	0	0.091405	0.100006	0.176838	0.174163	0.269171	0.279273	0.33202	0.356586	0.366285	0.379267
29	0.00017	0	0.092087	0.100511	0.178416	0.175081	0.27116	0.280779	0.33428	0.358479	0.36829	0.381329
29.2	0.000172	0	0.092784	0.101014	0.17936	0.175996	0.273048	0.282281	0.33662	0.360365	0.370406	0.383383
29.4	0.000171	0	0.093335	0.101515	0.17998	0.176907	0.274039	0.283777	0.33796	0.362245	0.372911	0.385431
29.6	0.000168	0	0.094909	0.102014	0.180715	0.177815	0.275409	0.285268	0.3393	0.364117	0.374661	0.387472
29.8	0.000167	0	0.094353	0.102511	0.181377	0.17872	0.276924	0.286754	0.34132	0.365983	0.376094	0.389506
30	0.000171	0	0.09526	0.103006	0.182006	0.179621	0.278533	0.288235	0.3428	0.367842	0.378666	0.391533
30.2	0.000167	0	0.095957	0.103498	0.183098	0.180519	0.279774	0.289711	0.34477	0.369694	0.380736	0.393553
30.4	0.00017	0	0.09571	0.103989	0.184501	0.181413	0.280954	0.291181	0.34676	0.371539	0.382467	0.395567
30.6	0.000173	0	0.095562	0.104477	0.185013	0.182304	0.281842	0.292647	0.34914	0.373377	0.383898	0.397573
30.8	0.000171	0	0.096237	0.104964	0.18599	0.183192	0.283492	0.294107	0.35128	0.375209	0.386225	0.399573
31	0.000174	0	0.097535	0.105448	0.186456	0.184076	0.284351	0.295562	0.353	0.377034	0.387904	0.401567
31.2	0.000177	0	0.098126	0.10593	0.186795	0.184957	0.286082	0.297013	0.35512	0.378853	0.38993	0.403553
31.4	0.000176	0	0.099729	0.10641	0.188092	0.185835	0.287826	0.298458	0.35709	0.380664	0.392459	0.405533
31.6	0.000177	0	0.100195	0.106888	0.188803	0.18671	0.289055	0.299898	0.35915	0.382469	0.394229	0.407506
31.8	0.000177	0	0.100304	0.107364	0.189357	0.187581	0.290383	0.301334	0.35982	0.384268	0.396789	0.409473
32	0.000172	0	0.101149	0.107838	0.189646	0.188449	0.292269	0.302764	0.36145	0.38606	0.398963	0.411433
32.2	0.000172	0	0.102581	0.10831	0.190344	0.189313	0.293429	0.30419	0.36265	0.387845	0.401085	0.413386
32.4	0.000175	0	0.102498	0.10878	0.19108	0.190175	0.295389	0.30561	0.36469	0.389624	0.403258	0.415333
32.6	0.000175	0	0.103245	0.109247	0.192546	0.191033	0.297559	0.307026	0.36657	0.391396	0.4049	0.417273
32.8	0.000174	0	0.104211	0.109713	0.19332	0.191888	0.298938	0.308437	0.36889	0.393162	0.406723	0.419207
33	0.000173	0	0.104946	0.110177	0.194624	0.19274	0.300342	0.309842	0.37053	0.394922	0.408409	0.421135
33.2	0.000172	0	0.106387	0.110639	0.195521	0.193588	0.301617	0.311243	0.37211	0.396674	0.410112	0.423055
33.4	0.000168	0	0.107191	0.111099	0.195657	0.194434	0.302431	0.31264	0.37335	0.398421	0.411729	0.42497
33.6	0.000172	0	0.106809	0.111557	0.196807	0.195276	0.304297	0.314031	0.37544	0.400161	0.412263	0.426878
33.8	0.000173	0	0.106743	0.112013	0.198093	0.196115	0.306368	0.315417	0.37785	0.401895	0.413682	0.428779
34	0.000172	0	0.10898	0.112467	0.199001	0.196951	0.308083	0.316799	0.37984	0.403622	0.415923	0.430674
34.2	0.000173	0	0.109123	0.112919	0.200466	0.197784	0.309555	0.318176	0.38205	0.405343	0.417498	0.432563
34.4	0.000178	0	0.108853	0.113369	0.201381	0.198613	0.311047	0.319548	0.38419	0.407058	0.418879	0.434446
34.6	0.000176	0	0.108968	0.113817	0.202665	0.19944	0.312649	0.320916	0.38667	0.408767	0.419808	0.436322
34.8	0.00018	0	0.10934	0.114263	0.203877	0.200263	0.314235	0.322278	0.38887	0.410469	0.421957	0.438191
35	0.000182	0	0.110503	0.114708	0.204674	0.201084	0.314848	0.323636	0.39089	0.412165	0.42325	0.440055
35.2	0.000177	0	0.111236	0.11515	0.205388	0.201901	0.31657	0.32499	0.39178	0.413855	0.425111	0.441912
35.4	0.000175	0	0.111455	0.115591	0.206831	0.202715	0.317357	0.326338	0.39232	0.415538	0.4279	0.443763
35.6	0.000173	0	0.111463	0.11603	0.207275	0.203526	0.318078	0.327682	0.39334	0.417216	0.429888	0.445608
35.8	0.00017	0	0.112004	0.116466	0.207063	0.204335	0.319335	0.329022	0.39352	0.418887	0.43299	0.447447
36	0.000172	0	0.113066	0.116901	0.208036	0.20514	0.320456	0.330356	0.39438	0.420552	0.43513	0.449279
36.2	0.000177	0	0.113112	0.117334	0.20939	0.205942	0.321766	0.331687	0.39527	0.422211	0.437049	0.451105
36.4	0.000176	0	0.113181	0.117766	0.210311	0.206741	0.323197	0.333012	0.39677	0.423864	0.438573	0.452925
36.6	0.000172	0	0.113814	0.118195	0.211404	0.207537	0.323777	0.334333	0.39786	0.425511	0.440396	0.454739
36.8	0.000175	0	0.113358	0.118622	0.211633	0.20833	0.32387	0.335649	0.3994	0.427152	0.442514	0.456547
37	0.000173	0	0.113438	0.119048	0.212878	0.20912	0.325346	0.336961	0.4004	0.428787	0.444486	0.458349
37.2	0.000171	0	0.114051	0.119472	0.212788	0.209907	0.326719	0.338268	0.40173	0.430416	0.446902	0.460145
37.4	0.000172	0	0.113697	0.119894	0.213226	0.210691	0.327804	0.339571	0.40361	0.432039	0.449052	0.461935
37.6	0.000173	0	0.11398	0.120314	0.214291	0.211473	0.32971	0.340869	0.40581	0.433656	0.450029	0.463718
37.8	0.000174	0	0.115885	0.120733	0.215346	0.212251	0.330974	0.342163	0.40798	0.435267	0.451351	0.465496
38	0.000179	0	0.116865	0.121149	0.216384	0.213026	0.331981	0.343452	0.41076	0.436873	0.452887	0.467268
38.2	0.000179	0	0.117399	0.121564	0.217221	0.213799	0.332779	0.344737	0.41355	0.438472	0.454005	0.469034
38.4	0.000178	0	0.117522	0.121977	0.217791	0.214569	0.333754	0.346018	0.41642	0.440066	0.454349	0.470794
38.6	0.000179	0	0.118172	0.122389	0.218977	0.215335	0.334858	0.347294	0.41836	0.441653	0.455595	0.472548
38.8	0.000178	0	0.11816	0.122798	0.219504	0.216099	0.335877	0.348565	0.42027	0.443235	0.457268	0.474296
39	0.000176	0	0.119857	0.123206	0.219884	0.21686	0.3367	0.349832	0.42224	0.444811	0.459618	0.476038
39.2	0.000174	0	0.120154	0.123612	0.220356	0.217618	0.33757	0.351095	0.42345	0.446382	0.461417	0.477774
39.4	0.000172	0	0.120772	0.124016	0.221661	0.218374	0.338803	0.352354	0.42499	0.447946	0.463174	0.479505
39.6	0.000171	0	0.12153	0.124419	0.222759	0.219126	0.340383	0.353608	0.42666	0.449505	0.465493	0.481229
39.8	0.000176	0	0.121625	0.12482	0.223422	0.219876	0.341711	0.354857	0.42732	0.451058	0.46723	0.482948
40	0.000179	0	0.122141	0.125219	0.224556	0.220623	0.343738	0.356103	0.42851	0.452606	0.468775	0.484661
40.2	0.000179	0	0.122357	0.125617	0.225731	0.221367	0.345589	0.357344	0.43018	0.454147	0.470005	0.486369
40.4	0.000181	0	0.12215	0.126012	0.226939	0.222108	0.347163	0.358581	0.43161	0.455684	0.471539	0.48807
40.6	0.000179	0	0.121932	0.126406	0.227472	0.222846	0.348332	0.359813	0.43296	0.457214	0.473396	0.489766
40.8	0.000181	0	0.122088	0.126799	0.228124	0.223582	0.350149	0.361042	0.43488	0.458739	0.474469	0.491457
41	0.000179	0	0.123093	0.127189	0.229215	0.224315	0.352174	0.362266	0.43541	0.460258	0.476294	0.493141
41.2	0.000182	0	0.122825	0.127578	0.229944	0.225045	0.353908	0.363485	0.43632	0.461772	0.478131	0.49482
41.4	0.00018	0	0.122702	0.127966	0.230848	0.225773	0.355231	0.364701	0.43746	0.46328	0.479336	0.496493
41.6	0.000181	0	0.12279	0.128351	0.231942	0.226497	0.356548	0.365912	0.43865	0.464783	0.479867	0.498161
41.8	0.000185	0	0.123553	0.128735	0.233133	0.227219	0.357136	0.36712	0.44035	0.46628	0.481184	0.499823
42	0.000182	0	0.124394	0.129118	0.234176	0.227939	0.358015	0.368323	0.44263	0.467772	0.482628	0.501479
42.2	0.000176	0	0.125294	0.129498	0.234726	0.228655	0.358713	0.369522	0.44361	0.469258	0.48392	0.50313
42.4	0.000176	0	0.125021	0.129878	0.235184	0.229369	0.359132	0.370716	0.44536	0.470739	0.48527	0.504775
42.6	0.000175	0	0.125869	0.130255	0.235621	0.23008	0.359668	0.371907	0.44686	0.472215	0.487534	0.506415
42.8	0.000173	0	0.126304	0.130631	0.235869	0.230789	0.360976	0.373093	0.44791	0.473685	0.488976	0.508049
43	0.000174	0	0.127546	0.131005	0.236256	0.231495	0.361271	0.374276	0.44936	0.475149	0.491156	0.509678
43.2	0.000175	0	0.127146	0.131378	0.236732	0.232198	0.362138	0.375454	0.45101	0.476608	0.492728	0.511302
43.4	0.000173	0	0.12825	0.131749	0.237723	0.232899	0.364125	0.376628	0.45266	0.478062	0.494502	0.512919
43.6	0.000176	0	0.12845	0.132118	0.237821	0.233597	0.365385	0.377799	0.45435	0.479511	0.49716	0.514532
43.8	0.000175	0	0.129196	0.132486	0.237476	0.234292	0.36618	0.378965	0.45582	0.480954	0.498665	0.516139
44	0.000172	0	0.130694	0.132853	0.237975	0.234985	0.367728	0.380127	0.45714	0.482392	0.50006	0.51774
44.2	0.000175	0	0.131316	0.133217	0.238809	0.235675	0.368874	0.381285	0.45949	0.483825	0.501536	0.519337
44.4	0.000175	0	0.131107	0.13358	0.239307	0.236363	0.370132	0.382439	0.46085	0.485253	0.503461	0.520928
44.6	0.000171	0	0.132507	0.133942	0.239679	0.237048	0.371089	0.383589	0.46184	0.486675	0.504628	0.522513
44.8	0.000176	0	0.133241	0.134302	0.240374	0.23773	0.372355	0.384735	0.46294	0.488092	0.506087	0.524093
45	0.000176	0	0.133854	0.134661	0.241029	0.23841	0.373731	0.385877	0.46356	0.489504	0.507663	0.525668
45.2	0.000178	0	0.133986	0.135018	0.241135	0.239087	0.375196	0.387016	0.46533	0.490911	0.50902	0.527238
45.4	0.000177	0	0.134038	0.135373	0.241613	0.239762	0.376592	0.38815	0.46625	0.492312	0.510967	0.528802
45.6	0.000181	0	0.133905	0.135727	0.242457	0.240435	0.377175	0.38928	0.46734	0.493709	0.512748	0.530361
45.8	0.000181	0	0.133709	0.13608	0.242471	0.241104	0.378043	0.390407	0.46873	0.4951	0.514524	0.531915
46	0.000182	0	0.133998	0.13643	0.243216	0.241772	0.379169	0.391529	0.46968	0.496486	0.515651	0.533463
46.2	0.000183	0	0.13304	0.13678	0.244447	0.242436	0.379998	0.392648	0.47032	0.497867	0.517472	0.535007
46.4	0.000183	0	0.132334	0.137128	0.244635	0.243098	0.381319	0.393763	0.47211	0.499244	0.519242	0.536545
46.6	0.000181	0	0.132695	0.137474	0.245351	0.243758	0.38265	0.394874	0.47364	0.500615	0.520914	0.538078
46.8	0.000186	0	0.132502	0.137819	0.245882	0.244416	0.384157	0.395981	0.47433	0.501981	0.522818	0.539606
47	0.000184	0	0.132901	0.138163	0.246575	0.24507	0.384383	0.397084	0.47694	0.503342	0.524814	0.541129
47.2	0.000184	0	0.132942	0.138505	0.247434	0.245723	0.384905	0.398184	0.47906	0.504698	0.526559	0.542646
47.4	0.000181	0	0.133451	0.138845	0.248343	0.246373	0.385602	0.399279	0.4813	0.506049	0.527898	0.544159
47.6	0.000178	0	0.133977	0.139184	0.249367	0.24702	0.386283	0.400371	0.48281	0.507395	0.530258	0.545666
47.8	0.000174	0	0.135363	0.139522	0.250059	0.247665	0.386222	0.401459	0.48413	0.508736	0.531158	0.547169
48	0.000176	0	0.13639	0.139858	0.251122	0.248308	0.387073	0.402544	0.48614	0.510073	0.532086	0.548666
48.2	0.000178	0	0.136597	0.140193	0.251687	0.248948	0.387309	0.403624	0.48758	0.511404	0.533573	0.550158
48.4	0.000175	0	0.137486	0.140526	0.252419	0.249586	0.388269	0.404701	0.48852	0.512731	0.534782	0.551646
48.6	0.000175	0	0.138939	0.140858	0.252844	0.250221	0.389225	0.405774	0.48883	0.514053	0.535391	0.553128
48.8	0.000178	0	0.138412	0.141188	0.253242	0.250854	0.390587	0.406844	0.49021	0.515369	0.536507	0.554605
49	0.000176	0	0.139229	0.141517	0.253071	0.251485	0.392116	0.407909	0.49141	0.516682	0.537286	0.556078
49.2	0.00018	0	0.140507	0.141845	0.252846	0.252113	0.393147	0.408972	0.49243	0.517989	0.538294	0.557545
49.4	0.00018	0	0.14009	0.142171	0.253145	0.252739	0.394044	0.41003	0.49203	0.519291	0.539944	0.559008
49.6	0.00018	0	0.140344	0.142496	0.253075	0.253363	0.395368	0.411085	0.49302	0.520589	0.540871	0.560465
49.8	0.000182	0	0.139903	0.14282	0.253557	0.253984	0.397632	0.412136	0.49426	0.521882	0.54139	0.561918
50	0.000185	0	0.140184	0.143142	0.254314	0.254603	0.399019	0.413183	0.49553	0.52317	0.542684	0.563366
50.2	0.000184	0	0.140295	0.143462	0.255212	0.25522	0.401161	0.414227	0.49679	0.524454	0.544733	0.564809
50.4	0.000183	0	0.140966	0.143782	0.255878	0.255834	0.402599	0.415267	0.49837	0.525732	0.546011	0.566247
50.6	0.000184	0	0.140902	0.1441	0.257235	0.256446	0.403622	0.416304	0.49981	0.527007	0.54805	0.56768
50.8	0.000181	0	0.141666	0.144416	0.257966	0.257056	0.404254	0.417337	0.50089	0.528276	0.549718	0.569108
51	0.000175	0	0.142941	0.144731	0.259023	0.257663	0.40481	0.418367	0.50289	0.529541	0.551294	0.570532
51.2	0.000176	0	0.142757	0.145045	0.259988	0.258268	0.405142	0.419392	0.50414	0.530801	0.552495	0.571951
51.4	0.000174	0	0.143529	0.145358	0.261074	0.258871	0.405952	0.420415	0.50513	0.532057	0.553829	0.573365
51.6	0.000174	0	0.143968	0.145669	0.261851	0.259472	0.406536	0.421434	0.50568	0.533308	0.55597	0.574774
51.8	0.000177	0	0.143906	0.145979	0.261833	0.26007	0.407073	0.422449	0.50776	0.534554	0.556839	0.576179
52	0.000177	0	0.144326	0.146287	0.262567	0.260667	0.408091	0.423461	0.50909	0.535796	0.558695	0.577579
52.2	0.000175	0	0.144337	0.146594	0.263118	0.26126	0.408528	0.424469	0.51036	0.537033	0.561185	0.578974
52.4	0.000176	0	0.143944	0.1469	0.263386	0.261852	0.40957	0.425474	0.51189	0.538266	0.56276	0.580364
52.6	0.000175	0	0.14367	0.147205	0.263635	0.262442	0.410724	0.426475	0.51278	0.539494	0.564048	0.58175
52.8	0.000176	0	0.143083	0.147508	0.263809	0.263029	0.411668	0.427473	0.51449	0.540718	0.566326	0.583131
53	0.000179	0	0.143971	0.14781	0.263092	0.263614	0.412442	0.428468	0.51544	0.541937	0.568601	0.584508
53.2	0.000182	0	0.144161	0.148111	0.262935	0.264197	0.412948	0.429459	0.5164	0.543152	0.569425	0.58588
53.4	0.000177	0	0.143751	0.14841	0.262945	0.264777	0.413608	0.430446	0.51705	0.544363	0.570948	0.587247
53.6	0.000181	0	0.143764	0.148708	0.263276	0.265356	0.415219	0.431431	0.51866	0.545568	0.571313	0.58861
53.8	0.000185	0	0.143652	0.149005	0.263653	0.265932	0.416298	0.432411	0.52025	0.54677	0.572575	0.589968
54	0.000183	0	0.145286	0.149301	0.263751	0.266506	0.417146	0.433389	0.52156	0.547967	0.574036	0.591321
54.2	0.000182	0	0.14633	0.149595	0.264832	0.267078	0.419298	0.434363	0.52267	0.54916	0.575539	0.59267
54.4	0.000185	0	0.145916	0.149888	0.265887	0.267648	0.419621	0.435333	0.52399	0.550348	0.57565	0.594015
54.6	0.00018	0	0.146531	0.15018	0.266968	0.268216	0.420912	0.436301	0.52511	0.551532	0.576734	0.595355
54.8	0.000178	0	0.147475	0.15047	0.267318	0.268781	0.421713	0.437265	0.52642	0.552712	0.577653	0.59669
55	0.000177	0	0.14779	0.15076	0.268526	0.269345	0.423285	0.438225	0.52765	0.553887	0.578616	0.598021
55.2	0.000176	0	0.14881	0.151048	0.269445	0.269906	0.424157	0.439182	0.52885	0.555058	0.579351	0.599347
55.4	0.000174	0	0.149867	0.151334	0.270422	0.270465	0.425921	0.440136	0.52982	0.556225	0.580661	0.600669
55.6	0.000177	0	0.149292	0.15162	0.271073	0.271023	0.427257	0.441087	0.53181	0.557388	0.582476	0.601987
55.8	0.000176	0	0.150333	0.151904	0.271621	0.271578	0.428976	0.442035	0.53397	0.558546	0.584006	0.6033
56	0.000174	0	0.151527	0.152187	0.27275	0.272131	0.430136	0.442979	0.53538	0.5597	0.586432	0.604609
56.2	0.000178	0	0.151439	0.152469	0.273792	0.272682	0.430724	0.44392	0.53746	0.56085	0.588766	0.605913
56.4	0.000176	0	0.152113	0.15275	0.274098	0.27323	0.43196	0.444857	0.53827	0.561996	0.5896	0.607213
56.6	0.000173	0	0.152824	0.15303	0.274329	0.273777	0.433115	0.445792	0.53943	0.563137	0.591389	0.608509
56.8	0.000177	0	0.151598	0.153308	0.274554	0.274322	0.433074	0.446723	0.54038	0.564274	0.592705	0.6098
57	0.000176	0	0.152383	0.153585	0.27426	0.274865	0.433821	0.447651	0.54094	0.565407	0.593502	0.611087
57.2	0.000177	0	0.152677	0.153861	0.274476	0.275405	0.434046	0.448575	0.54179	0.566536	0.593592	0.61237
57.4	0.000178	0	0.15249	0.154136	0.275305	0.275944	0.43474	0.449497	0.54276	0.567661	0.594267	0.613648
57.6	0.000182	0	0.152356	0.154409	0.276095	0.276481	0.436131	0.450415	0.54424	0.568782	0.594899	0.614922
57.8	0.000178	0	0.153457	0.154682	0.276162	0.277015	0.436322	0.45133	0.54512	0.569898	0.596194	0.616191
58	0.000178	0	0.153881	0.154953	0.276713	0.277548	0.436706	0.452242	0.5465	0.571011	0.597061	0.617457
58.2	0.000176	0	0.153323	0.155223	0.277663	0.278078	0.437345	0.453151	0.54744	0.572119	0.597523	0.618718
58.4	0.000175	0	0.153091	0.155492	0.278116	0.278607	0.438181	0.454057	0.54794	0.573223	0.598128	0.619975
58.6	0.000173	0	0.15277	0.15576	0.27961	0.279134	0.43907	0.45496	0.54909	0.574324	0.599467	0.621228
58.8	0.000175	0	0.152097	0.156026	0.280196	0.279658	0.44035	0.455859	0.55029	0.57542	0.601215	0.622476
59	0.000172	0	0.152735	0.156292	0.28084	0.280181	0.441301	0.456755	0.5515	0.576512	0.602417	0.62372
59.2	0.000176	0	0.152841	0.156556	0.28054	0.280702	0.442222	0.457649	0.55263	0.577601	0.603785	0.624961
59.4	0.00018	0	0.152155	0.156819	0.280387	0.28122	0.443444	0.458539	0.55378	0.578685	0.605506	0.626197
59.6	0.000178	0	0.152822	0.157082	0.280242	0.281737	0.444014	0.459426	0.55495	0.579765	0.606534	0.627428
59.8	0.000177	0	0.153818	0.157342	0.280265	0.282252	0.444435	0.46031	0.55602	0.580842	0.607773	0.628656
60	0.00018	0	0.154187	0.157602	0.280402	0.282765	0.44496	0.461191	0.55681	0.581914	0.609255	0.62988
60.2	0.00018	0	0.155159	0.157861	0.280622	0.283276	0.445666	0.462069	0.55762	0.582982	0.610538	0.631099
60.4	0.000176	0	0.156196	0.158119	0.280252	0.283785	0.447011	0.462944	0.55817	0.584047	0.611339	0.632314
60.6	0.000182	0	0.155951	0.158375	0.280525	0.284293	0.447698	0.463816	0.55884	0.585108	0.613173	0.633526
60.8	0.00018	0	0.156306	0.158631	0.28093	0.284798	0.447659	0.464684	0.55964	0.586165	0.614806	0.634733
61	0.000177	0	0.15764	0.158885	0.281218	0.285301	0.449031	0.46555	0.56036	0.587218	0.616173	0.635936
61.2	0.000183	0	0.157443	0.159138	0.28203	0.285803	0.449874	0.466413	0.56199	0.588267	0.617323	0.637135
61.4	0.000183	0	0.157729	0.15939	0.28304	0.286302	0.450917	0.467273	0.56347	0.589312	0.618371	0.63833
61.6	0.000181	0	0.157829	0.159641	0.28327	0.2868	0.451384	0.46813	0.56427	0.590353	0.619617	0.639521
61.8	0.000181	0	0.158069	0.159891	0.283799	0.287296	0.451602	0.468984	0.56506	0.591391	0.620858	0.640708
62	0.00018	0	0.157839	0.16014	0.285094	0.28779	0.452541	0.469835	0.56649	0.592425	0.62199	0.641891
62.2	0.000176	0	0.158916	0.160388	0.285736	0.288282	0.453805	0.470683	0.56738	0.593455	0.622746	0.64307
62.4	0.000178	0	0.158353	0.160635	0.285963	0.288773	0.455319	0.471528	0.56874	0.594481	0.624231	0.644245
62.6	0.000177	0	0.157778	0.160881	0.286534	0.289261	0.456249	0.47237	0.57084	0.595504	0.625407	0.645417
62.8	0.000177	0	0.158553	0.161125	0.286834	0.289748	0.457509	0.473209	0.57218	0.596522	0.626616	0.646584
63	0.00018	0	0.158471	0.161369	0.287419	0.290233	0.457643	0.474046	0.57356	0.597537	0.627787	0.647747
63.2	0.000182	0	0.158372	0.161612	0.287289	0.290716	0.458747	0.474879	0.57494	0.598549	0.629108	0.648906
63.4	0.000178	0	0.158208	0.161853	0.287638	0.291197	0.45927	0.47571	0.57615	0.599556	0.629973	0.650062
63.6	0.000178	0	0.158801	0.162094	0.287885	0.291676	0.45979	0.476538	0.57743	0.60056	0.630465	0.651214
63.8	0.000179	0	0.159187	0.162333	0.28836	0.292154	0.460492	0.477363	0.57934	0.60156	0.631464	0.652361
64	0.000178	0	0.159998	0.162572	0.288564	0.29263	0.461932	0.478185	0.58092	0.602557	0.633229	0.653505
64.2	0.000178	0	0.159859	0.162809	0.289014	0.293104	0.46327	0.479004	0.58245	0.60355	0.634297	0.654645
64.4	0.000178	0	0.160029	0.163046	0.2891	0.293576	0.464333	0.47982	0.58316	0.604539	0.635593	0.655781
64.6	0.000176	0	0.16001	0.163281	0.290045	0.294047	0.465042	0.480634	0.58439	0.605525	0.636991	0.656914
64.8	0.000174	0	0.160242	0.163515	0.290191	0.294515	0.46601	0.481444	0.58572	0.606507	0.638228	0.658042
65	0.000176	0	0.159775	0.163749	0.290546	0.294982	0.466833	0.482252	0.58682	0.607486	0.639382	0.659167
65.2	0.000178	0	0.160448	0.163981	0.291165	0.295448	0.467904	0.483058	0.58877	0.60846	0.640993	0.660288
65.4	0.000171	0	0.161232	0.164213	0.291736	0.295911	0.469039	0.48386	0.5891	0.609432	0.64204	0.661406
65.6	0.000172	0	0.16146	0.164443	0.292006	0.296373	0.469935	0.484659	0.58993	0.6104	0.643048	0.662519
65.8	0.00017	0	0.162393	0.164672	0.292646	0.296833	0.471197	0.485456	0.59086	0.611364	0.644472	0.663629
66	0.000167	0	0.162128	0.164901	0.292672	0.297291	0.472107	0.48625	0.59163	0.612325	0.644983	0.664735
66.2	0.000167	0	0.162548	0.165128	0.292587	0.297748	0.472921	0.487042	0.59257	0.613282	0.646264	0.665837
66.4	0.000164	0	0.162504	0.165355	0.292845	0.298203	0.474467	0.48783	0.59386	0.614235	0.647484	0.666936
66.6	0.00016	0	0.163556	0.16558	0.293116	0.298656	0.475396	0.488616	0.59474	0.615186	0.649042	0.668031
66.8	0.000164	0	0.163853	0.165805	0.294184	0.299107	0.475485	0.489399	0.59524	0.616132	0.650249	0.669122
67	0.000164	0	0.164059	0.166029	0.294524	0.299557	0.475766	0.49018	0.59565	0.617076	0.651806	0.67021
67.2	0.000162	0	0.165371	0.166251	0.295004	0.300005	0.476526	0.490957	0.59694	0.618015	0.652541	0.671293
67.4	0.000167	0	0.164786	0.166473	0.295544	0.300452	0.476772	0.491732	0.59785	0.618952	0.653022	0.672374
67.6	0.000169	0	0.165401	0.166694	0.296433	0.300896	0.477235	0.492505	0.59955	0.619885	0.653806	0.67345
67.8	0.000166	0	0.166013	0.166913	0.296731	0.301339	0.477947	0.493275	0.60084	0.620814	0.654382	0.674523
68	0.000169	0	0.165516	0.167132	0.297577	0.301781	0.47938	0.494042	0.60167	0.62174	0.655377	0.675593
68.2	0.000171	0	0.165203	0.16735	0.298334	0.30222	0.480375	0.494806	0.6022	0.622663	0.655968	0.676659
68.4	0.00017	0	0.166151	0.167567	0.298645	0.302659	0.48105	0.495568	0.60362	0.623582	0.656774	0.677721
68.6	0.000174	0	0.165437	0.167783	0.299604	0.303095	0.481467	0.496327	0.60491	0.624498	0.657245	0.67878
68.8	0.00018	0	0.165763	0.167998	0.299619	0.30353	0.481876	0.497083	0.60565	0.625411	0.658047	0.679835
69	0.000178	0	0.166358	0.168213	0.300005	0.303963	0.482464	0.497837	0.60655	0.62632	0.659383	0.680886
69.2	0.000178	0	0.167383	0.168426	0.300936	0.304395	0.483841	0.498588	0.60722	0.627226	0.660063	0.681934
69.4	0.000174	0	0.167389	0.168638	0.301587	0.304825	0.484854	0.499337	0.60793	0.628129	0.661196	0.682979
69.6	0.000174	0	0.168217	0.16885	0.302021	0.305253	0.485224	0.500083	0.60902	0.629028	0.661551	0.68402
69.8	0.000171	0	0.167984	0.16906	0.30282	0.30568	0.486041	0.500827	0.60942	0.629924	0.66278	0.685057
70	0.000175	0	0.16727	0.16927	0.303071	0.306105	0.4867	0.501568	0.60983	0.630817	0.663741	0.686091
70.2	0.000171	0	0.167933	0.169479	0.303566	0.306528	0.488114	0.502306	0.61075	0.631707	0.665433	0.687122
70.4	0.000172	0	0.168706	0.169686	0.303821	0.30695	0.488834	0.503042	0.61172	0.632593	0.66706	0.688149
70.6	0.000175	0	0.16916	0.169893	0.30378	0.307371	0.488827	0.503775	0.61248	0.633476	0.668718	0.689173
70.8	0.000174	0	0.169587	0.1701	0.304842	0.307789	0.489061	0.504506	0.61349	0.634356	0.670513	0.690193
71	0.000171	0	0.170213	0.170305	0.304983	0.308207	0.489322	0.505234	0.61499	0.635232	0.672371	0.69121
71.2	0.000174	0	0.170095	0.170509	0.30498	0.308622	0.489803	0.50596	0.61673	0.636106	0.673065	0.692223
71.4	0.000176	0	0.170305	0.170712	0.304967	0.309036	0.490254	0.506683	0.61714	0.636976	0.67462	0.693233
71.6	0.000173	0	0.170183	0.170915	0.305681	0.309449	0.491066	0.507404	0.61815	0.637843	0.676328	0.69424
71.8	0.000175	0	0.169682	0.171117	0.30625	0.30986	0.492244	0.508122	0.61883	0.638707	0.677489	0.695243
72	0.000174	0	0.169881	0.171318	0.307731	0.310269	0.493581	0.508838	0.61989	0.639567	0.67861	0.696243
72.2	0.00017	0	0.170032	0.171518	0.308158	0.310677	0.494557	0.509551	0.62111	0.640425	0.679733	0.697239
72.4	0.000172	0	0.169776	0.171717	0.308371	0.311084	0.49491	0.510262	0.62277	0.641279	0.680314	0.698232
72.6	0.000175	0	0.169463	0.171915	0.308913	0.311488	0.495782	0.51097	0.6237	0.64213	0.68074	0.699222
72.8	0.000174	0	0.170215	0.172112	0.309091	0.311892	0.49639	0.511676	0.62463	0.642978	0.681553	0.700208
73	0.000172	0	0.170691	0.172309	0.309453	0.312294	0.497411	0.512379	0.62526	0.643823	0.681686	0.701191
73.2	0.00017	0	0.171257	0.172505	0.31041	0.312694	0.498299	0.51308	0.62597	0.644665	0.682144	0.702171
73.4	0.000164	0	0.171687	0.1727	0.31128	0.313093	0.499155	0.513779	0.62682	0.645504	0.682721	0.703148
73.6	0.000162	0	0.171775	0.172894	0.312086	0.31349	0.499961	0.514475	0.62729	0.64634	0.68271	0.704121
73.8	0.000161	0	0.170895	0.173087	0.312568	0.313886	0.500966	0.515169	0.62862	0.647173	0.683635	0.705091
74	0.000162	0	0.170821	0.173279	0.312689	0.31428	0.502122	0.51586	0.6293	0.648002	0.685115	0.706058
74.2	0.000164	0	0.170973	0.173471	0.312754	0.314673	0.502906	0.516549	0.63044	0.648829	0.686485	0.707021
74.4	0.000168	0	0.171476	0.173662	0.313635	0.315065	0.503081	0.517236	0.63133	0.649652	0.687801	0.707981
74.6	0.000166	0	0.171811	0.173852	0.313517	0.315454	0.504781	0.51792	0.63272	0.650473	0.689192	0.708938
74.8	0.000166	0	0.172081	0.174041	0.313986	0.315843	0.505667	0.518602	0.63381	0.651291	0.690567	0.709892
75	0.00017	0	0.172409	0.174229	0.313955	0.31623	0.506291	0.519282	0.63448	0.652105	0.69228	0.710843
75.2	0.000169	0	0.172957	0.174417	0.314185	0.316616	0.507247	0.519959	0.63491	0.652917	0.693771	0.71179
75.4	0.000168	0	0.173404	0.174603	0.314704	0.317	0.507489	0.520634	0.63522	0.653725	0.695811	0.712734
75.6	0.000171	0	0.173059	0.174789	0.314846	0.317382	0.508683	0.521306	0.63638	0.654531	0.697376	0.713675
75.8	0.000169	0	0.173771	0.174974	0.315105	0.317764	0.509443	0.521976	0.63729	0.655334	0.698399	0.714613
76	0.000165	0	0.174096	0.175159	0.315792	0.318143	0.510439	0.522644	0.63841	0.656133	0.699689	0.715548
76.2	0.000167	0	0.173646	0.175342	0.315235	0.318522	0.511277	0.52331	0.63901	0.65693	0.700434	0.71648
76.4	0.000169	0	0.174494	0.175525	0.315489	0.318899	0.512175	0.523973	0.64004	0.657724	0.701385	0.717408
76.6	0.000169	0	0.175011	0.175707	0.315358	0.319274	0.5132	0.524634	0.64144	0.658515	0.702239	0.718333
76.8	0.000173	0	0.175083	0.175888	0.315346	0.319648	0.513648	0.525292	0.64213	0.659303	0.703353	0.719256
77	0.000173	0	0.17529	0.176068	0.31614	0.320021	0.514267	0.525949	0.64316	0.660089	0.703744	0.720175
77.2	0.00017	0	0.175116	0.176248	0.316509	0.320393	0.514808	0.526603	0.64444	0.660871	0.704662	0.721091
77.4	0.000171	0	0.174578	0.176427	0.316611	0.320763	0.515115	0.527255	0.64511	0.661651	0.705096	0.722004
77.6	0.000169	0	0.173961	0.176605	0.316968	0.321131	0.515488	0.527904	0.64722	0.662427	0.706127	0.722914
77.8	0.000167	0	0.173806	0.176782	0.316761	0.321498	0.516151	0.528552	0.64858	0.663201	0.707601	0.72382
78	0.00017	0	0.173521	0.176959	0.316737	0.321864	0.516951	0.529197	0.6491	0.663972	0.708937	0.724724
78.2	0.00017	0	0.173429	0.177135	0.316946	0.322229	0.517391	0.52984	0.65072	0.66474	0.709102	0.725625
78.4	0.000168	0	0.173638	0.17731	0.317328	0.322592	0.518635	0.53048	0.65161	0.665505	0.710255	0.726523
78.6	0.00017	0	0.173367	0.177484	0.317267	0.322953	0.519922	0.531119	0.65241	0.666268	0.711608	0.727417
78.8	0.000172	0	0.173551	0.177658	0.317831	0.323314	0.519857	0.531755	0.65305	0.667028	0.71227	0.728309
79	0.00017	0	0.174361	0.177831	0.318088	0.323673	0.520477	0.532389	0.65376	0.667785	0.713748	0.729198
79.2	0.000166	0	0.174699	0.178003	0.318021	0.32403	0.520991	0.533021	0.65498	0.668539	0.714674	0.730084
79.4	0.000166	0	0.174991	0.178174	0.317325	0.324387	0.521372	0.533651	0.65599	0.66929	0.715792	0.730966
79.6	0.000165	0	0.175758	0.178345	0.317467	0.324742	0.522504	0.534278	0.65675	0.670039	0.716595	0.731846
79.8	0.000163	0	0.175787	0.178515	0.318314	0.325095	0.522923	0.534904	0.65765	0.670785	0.716855	0.732723
80	0.000166	0	0.175223	0.178684	0.319165	0.325448	0.523823	0.535527	0.65873	0.671528	0.717096	0.733597
80.2	0.000169	0	0.175476	0.178852	0.318765	0.325799	0.524767	0.536148	0.65961	0.672269	0.717722	0.734468
80.4	0.00017	0	0.176457	0.17902	0.319779	0.326148	0.526092	0.536767	0.66105	0.673007	0.718977	0.735336
80.6	0.000172	0	0.177136	0.179187	0.320455	0.326497	0.527041	0.537383	0.66268	0.673742	0.719614	0.736201
80.8	0.000175	0	0.177153	0.179353	0.321352	0.326844	0.527665	0.537998	0.66365	0.674474	0.720889	0.737063
81	0.000174	0	0.177077	0.179519	0.322268	0.32719	0.527645	0.53861	0.6649	0.675204	0.721389	0.737922
81.2	0.000178	0	0.176723	0.179684	0.322111	0.327534	0.528086	0.539221	0.66561	0.675931	0.722092	0.738779
81.4	0.000179	0	0.176925	0.179848	0.322393	0.327877	0.528129	0.539829	0.66612	0.676655	0.72281	0.739632
81.6	0.000176	0	0.178055	0.180011	0.322963	0.328219	0.528922	0.540435	0.66761	0.677377	0.724141	0.740483
81.8	0.000178	0	0.178437	0.180174	0.322723	0.32856	0.529504	0.541039	0.66735	0.678096	0.7253	0.741331
82	0.000176	0	0.178681	0.180336	0.322965	0.328899	0.529457	0.541641	0.66834	0.678813	0.725847	0.742176
82.2	0.00017	0	0.17913	0.180497	0.323966	0.329237	0.529642	0.542241	0.66888	0.679526	0.726491	0.743018
82.4	0.000173	0	0.17965	0.180658	0.323845	0.329574	0.530297	0.542839	0.66909	0.680238	0.727753	0.743857
82.6	0.000174	0	0.179749	0.180818	0.323819	0.329909	0.530686	0.543435	0.66934	0.680946	0.728729	0.744694
82.8	0.000169	0	0.180804	0.180977	0.323817	0.330244	0.53169	0.544028	0.67053	0.681652	0.729822	0.745527
83	0.000168	0	0.181174	0.181136	0.322704	0.330577	0.532352	0.54462	0.67172	0.682356	0.731605	0.746358
83.2	0.000165	0	0.180893	0.181294	0.323123	0.330909	0.532565	0.54521	0.67218	0.683057	0.732851	0.747186
83.4	0.000162	0	0.181951	0.181451	0.323561	0.331239	0.533126	0.545797	0.67264	0.683755	0.734581	0.748011
83.6	0.000161	0	0.181455	0.181608	0.324363	0.331568	0.533941	0.546383	0.67322	0.684451	0.73545	0.748834
83.8	0.000166	0	0.180819	0.181763	0.324484	0.331896	0.534693	0.546966	0.6744	0.685144	0.736247	0.749654
84	0.000167	0	0.181577	0.181919	0.325227	0.332223	0.535588	0.547548	0.67558	0.685835	0.73657	0.750471
84.2	0.000165	0	0.182179	0.182073	0.325658	0.332549	0.537058	0.548127	0.67634	0.686523	0.738025	0.751285
84.4	0.000167	0	0.182197	0.182227	0.32659	0.332873	0.538242	0.548705	0.6777	0.687208	0.739198	0.752096
84.6	0.000166	0	0.182533	0.18238	0.327124	0.333196	0.538726	0.54928	0.67864	0.687891	0.739916	0.752905
84.8	0.000162	0	0.181801	0.182533	0.327666	0.333518	0.539695	0.549854	0.67882	0.688572	0.74103	0.753711
85	0.000165	0	0.181426	0.182685	0.328595	0.333839	0.540686	0.550425	0.67916	0.68925	0.74152	0.754515
85.2	0.000166	0	0.182193	0.182836	0.32888	0.334159	0.541348	0.550995	0.67962	0.689926	0.742185	0.755315
85.4	0.000165	0	0.183037	0.182987	0.329462	0.334477	0.542527	0.551562	0.68055	0.690599	0.743122	0.756113
85.6	0.000168	0	0.183299	0.183137	0.33026	0.334794	0.544008	0.552128	0.68081	0.69127	0.743939	0.756908
85.8	0.00017	0	0.183178	0.183286	0.330419	0.33511	0.544323	0.552691	0.68102	0.691938	0.744647	0.757701
86	0.000168	0	0.183609	0.183435	0.331025	0.335425	0.545146	0.553253	0.68233	0.692604	0.745305	0.758491
86.2	0.000169	0	0.184336	0.183583	0.331473	0.335738	0.546349	0.553813	0.6831	0.693267	0.746013	0.759278
86.4	0.000171	0	0.184688	0.183731	0.330804	0.336051	0.547805	0.554371	0.68343	0.693928	0.747323	0.760063
86.6	0.000168	0	0.184878	0.183877	0.330252	0.336362	0.548662	0.554926	0.68471	0.694586	0.749073	0.760845
86.8	0.00017	0	0.185108	0.184024	0.32981	0.336672	0.549422	0.55548	0.68604	0.695243	0.750355	0.761624
87	0.000173	0	0.184789	0.184169	0.329039	0.336981	0.549342	0.556033	0.68683	0.695896	0.751479	0.762401
87.2	0.000169	0	0.185472	0.184314	0.329993	0.337289	0.549152	0.556583	0.6868	0.696548	0.752309	0.763175
87.4	0.000169	0	0.185404	0.184458	0.33038	0.337596	0.549163	0.557131	0.68732	0.697197	0.753713	0.763947
87.6	0.000171	0	0.184895	0.184602	0.330326	0.337901	0.549299	0.557677	0.68858	0.697843	0.754214	0.764716
87.8	0.000169	0	0.18573	0.184745	0.330389	0.338205	0.549152	0.558222	0.69003	0.698487	0.754676	0.765482
88	0.000169	0	0.186356	0.184888	0.331818	0.338508	0.549786	0.558764	0.69004	0.699129	0.755464	0.766246
88.2	0.000169	0	0.185606	0.185029	0.332004	0.338811	0.550437	0.559305	0.69083	0.699769	0.757064	0.767007
88.4	0.000167	0	0.185526	0.185171	0.332232	0.339111	0.550895	0.559844	0.69239	0.700406	0.758043	0.767766
88.6	0.000164	0	0.185254	0.185311	0.33337	0.339411	0.551106	0.560381	0.6929	0.701041	0.758653	0.768522
88.8	0.000162	0	0.185272	0.185451	0.334123	0.33971	0.552314	0.560916	0.69363	0.701673	0.759513	0.769276
89	0.000161	0	0.185741	0.185591	0.335123	0.340007	0.553067	0.561449	0.69494	0.702303	0.760625	0.770027
89.2	0.000162	0	0.186565	0.18573	0.33547	0.340304	0.553544	0.561981	0.69636	0.702931	0.761835	0.770775
89.4	0.000165	0	0.186021	0.185868	0.335788	0.340599	0.554572	0.56251	0.69705	0.703557	0.763224	0.771521
89.6	0.000165	0	0.186315	0.186006	0.336544	0.340893	0.555056	0.563038	0.6977	0.70418	0.76379	0.772265
89.8	0.000161	0	0.186942	0.186143	0.336363	0.341186	0.555877	0.563564	0.6983	0.704801	0.765095	0.773006
90	0.000161	0	0.187126	0.186279	0.337023	0.341478	0.557532	0.564088	0.69898	0.70542	0.765606	0.773744
90.2	0.000159	0	0.187943	0.186415	0.337023	0.341769	0.558732	0.56461	0.69921	0.706036	0.766355	0.77448
90.4	0.000156	0	0.188497	0.18655	0.337012	0.342059	0.56008	0.565131	0.69957	0.70665	0.767846	0.775214
90.6	0.000159	0	0.188055	0.186685	0.3371	0.342348	0.560501	0.56565	0.70084	0.707262	0.768759	0.775945
90.8	0.000163	0	0.188035	0.186819	0.337686	0.342635	0.56095	0.566166	0.70195	0.707872	0.769436	0.776674
91	0.000161	0	0.188554	0.186953	0.338276	0.342922	0.561043	0.566682	0.70328	0.708479	0.769981	0.7774
91.2	0.000163	0	0.188842	0.187086	0.339137	0.343208	0.560485	0.567195	0.70395	0.709085	0.770701	0.778124
91.4	0.000166	0	0.188227	0.187218	0.339742	0.343492	0.560698	0.567706	0.70501	0.709688	0.771496	0.778845
91.6	0.000162	0	0.189564	0.18735	0.340032	0.343775	0.561691	0.568216	0.7065	0.710289	0.772485	0.779564
91.8	0.000163	0	0.189221	0.187482	0.340883	0.344058	0.562729	0.568724	0.70714	0.710887	0.773625	0.78028
92	0.000166	0	0.188659	0.187612	0.341574	0.344339	0.563971	0.569231	0.70798	0.711484	0.775201	0.780994
92.2	0.000164	0	0.187961	0.187742	0.341727	0.344619	0.564959	0.569735	0.71014	0.712078	0.776348	0.781706
92.4	0.000165	0	0.18762	0.187872	0.341946	0.344898	0.565476	0.570238	0.71175	0.71267	0.776893	0.782415
92.6	0.000168	0	0.186935	0.188001	0.342365	0.345176	0.565918	0.570739	0.71277	0.71326	0.777329	0.783122
92.8	0.000166	0	0.188247	0.18813	0.342065	0.345453	0.566665	0.571238	0.71402	0.713848	0.77841	0.783827
93	0.000166	0	0.18833	0.188258	0.34215	0.345729	0.567195	0.571736	0.71473	0.714433	0.779525	0.784529
93.2	0.000169	0	0.188821	0.188385	0.342172	0.346004	0.567276	0.572232	0.71548	0.715017	0.780314	0.785229
93.4	0.000165	0	0.189809	0.188512	0.341962	0.346278	0.567356	0.572726	0.71584	0.715598	0.781504	0.785926
93.6	0.000165	0	0.191266	0.188638	0.341451	0.346551	0.568312	0.573218	0.71693	0.716177	0.782316	0.786621
93.8	0.000165	0	0.191411	0.188764	0.340737	0.346823	0.569375	0.573709	0.71741	0.716754	0.782985	0.787314
94	0.000163	0	0.191854	0.188889	0.340791	0.347094	0.569992	0.574198	0.71834	0.717329	0.783185	0.788004
94.2	0.000159	0	0.193064	0.189014	0.340561	0.347364	0.570892	0.574686	0.71836	0.717902	0.784477	0.788693
94.4	0.000162	0	0.193333	0.189138	0.34033	0.347632	0.571311	0.575171	0.71912	0.718473	0.785247	0.789378
94.6	0.000161	0	0.193449	0.189262	0.340541	0.3479	0.571525	0.575655	0.72018	0.719042	0.785898	0.790062
94.8	0.000159	0	0.193801	0.189385	0.340907	0.348167	0.571892	0.576138	0.72134	0.719608	0.786445	0.790743
95	0.000162	0	0.193747	0.189508	0.340572	0.348433	0.57197	0.576618	0.72171	0.720173	0.787583	0.791422
95.2	0.000164	0	0.194493	0.18963	0.340909	0.348698	0.572466	0.577097	0.72183	0.720735	0.789023	0.792099
95.4	0.000161	0	0.194679	0.189751	0.341419	0.348962	0.573715	0.577575	0.72231	0.721296	0.790293	0.792773
95.6	0.000159	0	0.194446	0.189872	0.341947	0.349224	0.574901	0.57805	0.72295	0.721854	0.791714	0.793445
95.8	0.000163	0	0.19368	0.189993	0.342526	0.349486	0.575257	0.578524	0.72361	0.72241	0.792987	0.794115
96	0.000162	0	0.193551	0.190113	0.343434	0.349747	0.575275	0.578997	0.72445	0.722964	0.794558	0.794783
96.2	0.000163	0	0.192661	0.190232	0.344387	0.350007	0.575765	0.579468	0.72506	0.723517	0.795402	0.795448
96.4	0.000168	0	0.19251	0.190351	0.345263	0.350266	0.57612	0.579937	0.72575	0.724067	0.795921	0.796111
96.6	0.000163	0	0.192911	0.19047	0.346623	0.350524	0.576549	0.580404	0.72629	0.724615	0.796375	0.796772
96.8	0.00016	0	0.19298	0.190588	0.347699	0.350781	0.577244	0.58087	0.72683	0.725161	0.797556	0.797431
97	0.000159	0	0.192306	0.190705	0.348954	0.351037	0.577722	0.581334	0.72699	0.725706	0.798337	0.798087
97.2	0.000158	0	0.193101	0.190822	0.349671	0.351292	0.577906	0.581797	0.72766	0.726248	0.798588	0.798741
97.4	0.000159	0	0.192956	0.190938	0.349912	0.351546	0.578344	0.582258	0.72825	0.726788	0.799555	0.799393
97.6	0.000164	0	0.192025	0.191054	0.349557	0.351799	0.579502	0.582718	0.72922	0.727326	0.799985	0.800043
97.8	0.000161	0	0.192117	0.19117	0.349964	0.352051	0.579084	0.583176	0.7303	0.727862	0.800012	0.800691
98	0.000161	0	0.19199	0.191285	0.349442	0.352303	0.579768	0.583632	0.73067	0.728397	0.800376	0.801336
98.2	0.000164	0	0.192008	0.191399	0.34961	0.352553	0.580938	0.584087	0.73119	0.728929	0.800929	0.80198
98.4	0.000163	0	0.192682	0.191513	0.349308	0.352802	0.581087	0.58454	0.73289	0.72946	0.80034	0.802621
98.6	0.000162	0	0.193201	0.191627	0.348997	0.353051	0.582155	0.584992	0.73389	0.729988	0.801143	0.80326
98.8	0.000164	0	0.193102	0.19174	0.349121	0.353298	0.582572	0.585442	0.73493	0.730515	0.801591	0.803897
99	0.000164	0	0.19387	0.191852	0.348649	0.353545	0.583352	0.58589	0.73526	0.731039	0.803571	0.804531
99.2	0.000161	0	0.194682	0.191964	0.349115	0.353791	0.584121	0.586337	0.73625	0.731562	0.804133	0.805164
99.4	0.000163	0	0.195328	0.192076	0.349705	0.354035	0.584523	0.586783	0.73704	0.732083	0.804915	0.805795
99.6	0.000163	0	0.19617	0.192187	0.34992	0.354279	0.585042	0.587226	0.73807	0.732601	0.805957	0.806423
99.8	0.000164	0	0.196753	0.192297	0.349975	0.354522	0.585719	0.587669	0.73912	0.733118	0.806936	0.807049
100	0.000165	0	0.197175	0.192408	0.35072	0.354764	0.58643	0.58811	0.74018	0.733634	0.807549	0.807673
100.2	0.000167	0	0.198421	0.192517	0.351202	0.355005	0.587699	0.588549	0.74144	0.734147	0.807897	0.808295
100.4	0.000166	0	0.199451	0.192626	0.351863	0.355245	0.588949	0.588987	0.7419	0.734658	0.809035	0.808915
100.6	0.000162	0	0.199005	0.192735	0.352099	0.355485	0.589558	0.589423	0.74247	0.735167	0.809773	0.809533
100.8	0.00016	0	0.198874	0.192843	0.352795	0.355723	0.591127	0.589858	0.74285	0.735675	0.81082	0.810149
101	0.000158	0	0.198957	0.192951	0.353164	0.355961	0.590605	0.590291	0.743	0.736181	0.812011	0.810763
101.2	0.00016	0	0.198408	0.193058	0.353065	0.356197	0.590714	0.590723	0.74378	0.736685	0.812985	0.811374
101.4	0.000165	0	0.19775	0.193165	0.352487	0.356433	0.591349	0.591153	0.74446	0.737187	0.814648	0.811984
101.6	0.000162	0	0.197695	0.193272	0.352077	0.356668	0.591256	0.591582	0.74489	0.737687	0.815346	0.812591
101.8	0.000162	0	0.197907	0.193378	0.351523	0.356902	0.59125	0.592009	0.74614	0.738185	0.815904	0.813197
102	0.000166	0	0.196922	0.193483	0.350732	0.357135	0.593058	0.592435	0.74682	0.738682	0.816768	0.8138
102.2	0.000163	0	0.197334	0.193588	0.351563	0.357367	0.593804	0.592859	0.74784	0.739176	0.816879	0.814402
102.4	0.00016	0	0.197048	0.193693	0.351753	0.357598	0.594326	0.593282	0.74886	0.739669	0.817233	0.815001
102.6	0.000163	0	0.197212	0.193797	0.35165	0.357829	0.595301	0.593703	0.74963	0.74016	0.818591	0.815599
102.8	0.000158	0	0.197285	0.193901	0.352874	0.358058	0.595538	0.594123	0.75053	0.74065	0.819451	0.816194
103	0.000155	0	0.196821	0.194004	0.353368	0.358287	0.596322	0.594542	0.75075	0.741137	0.820516	0.816788
103.2	0.000157	0	0.196852	0.194107	0.354656	0.358515	0.596882	0.594959	0.75204	0.741623	0.820569	0.817379
103.4	0.000159	0	0.197361	0.194209	0.355477	0.358742	0.597294	0.595374	0.75229	0.742107	0.821241	0.817968
103.6	0.000157	0	0.197278	0.194311	0.356155	0.358968	0.598613	0.595789	0.75291	0.742589	0.821772	0.818556
103.8	0.000161	0	0.197396	0.194412	0.356306	0.359193	0.599276	0.596201	0.75397	0.743069	0.822135	0.819141
104	0.00016	0	0.198305	0.194514	0.357672	0.359418	0.599722	0.596613	0.75472	0.743548	0.82283	0.819725
104.2	0.000158	0	0.198792	0.194614	0.358513	0.359642	0.599879	0.597023	0.7552	0.744025	0.824152	0.820306
104.4	0.000159	0	0.198344	0.194714	0.358473	0.359864	0.600052	0.597431	0.75547	0.7445	0.826034	0.820886
104.6	0.000157	0	0.198267	0.194814	0.358373	0.360086	0.600181	0.597838	0.75687	0.744974	0.827239	0.821464
104.8	0.000155	0	0.198985	0.194913	0.359345	0.360307	0.600612	0.598244	0.75746	0.745445	0.828271	0.822039
105	0.000159	0	0.199624	0.195012	0.359085	0.360528	0.599856	0.598648	0.75856	0.745915	0.829455	0.822613
105.2	0.000159	0	0.200985	0.195111	0.358804	0.360747	0.60113	0.599051	0.75913	0.746383	0.830304	0.823185
105.4	0.000159	0	0.201598	0.195209	0.357774	0.360966	0.601288	0.599452	0.75976	0.74685	0.831453	0.823755
105.6	0.000159	0	0.201141	0.195307	0.357201	0.361184	0.601278	0.599853	0.76052	0.747315	0.8321	0.824323
105.8	0.000161	0	0.201298	0.195404	0.356735	0.361401	0.602244	0.600251	0.76189	0.747778	0.833633	0.824889
106	0.000161	0	0.201149	0.195501	0.356621	0.361617	0.603097	0.600649	0.76255	0.748239	0.834453	0.825453
106.2	0.000164	0	0.201331	0.195597	0.357259	0.361832	0.603394	0.601044	0.76451	0.748699	0.834935	0.826015
106.4	0.000164	0	0.201331	0.195693	0.356767	0.362047	0.604457	0.601439	0.76575	0.749157	0.836457	0.826576
106.6	0.000166	0	0.202142	0.195789	0.356722	0.362261	0.604879	0.601832	0.76666	0.749613	0.837485	0.827134
106.8	0.000167	0	0.201346	0.195884	0.356992	0.362474	0.605002	0.602224	0.76694	0.750068	0.837945	0.827691
107	0.000174	0	0.201838	0.195979	0.357462	0.362686	0.605359	0.602615	0.76765	0.750521	0.838738	0.828246
107.2	0.000174	0	0.20152	0.196073	0.357861	0.362897	0.605633	0.603004	0.76905	0.750973	0.839201	0.828799
107.4	0.000176	0	0.200142	0.196167	0.358091	0.363108	0.605981	0.603392	0.76947	0.751422	0.839533	0.82935
107.6	0.000179	0	0.200045	0.19626	0.358593	0.363318	0.606443	0.603778	0.77024	0.75187	0.839984	0.829899
107.8	0.000178	0	0.200545	0.196354	0.359109	0.363527	0.606317	0.604163	0.77176	0.752317	0.840393	0.830446
108	0.000173	0	0.199939	0.196446	0.359699	0.363735	0.606856	0.604547	0.77179	0.752762	0.840686	0.830992
108.2	0.000173	0	0.200229	0.196539	0.359629	0.363942	0.606681	0.60493	0.7727	0.753205	0.840772	0.831536
108.4	0.000172	0	0.200979	0.196631	0.35928	0.364149	0.607549	0.605311	0.77333	0.753646	0.841596	0.832077
108.6	0.000171	0	0.200717	0.196722	0.3595	0.364355	0.608448	0.605691	0.77411	0.754086	0.841652	0.832617
108.8	0.000175	0	0.200724	0.196813	0.359493	0.36456	0.608593	0.606069	0.77442	0.754525	0.841842	0.833156
109	0.000173	0	0.201708	0.196904	0.359525	0.364764	0.609091	0.606446	0.77513	0.754961	0.842522	0.833692
109.2	0.000166	0	0.202364	0.196994	0.359927	0.364968	0.610238	0.606822	0.77575	0.755397	0.843386	0.834227
109.4	0.000168	0	0.201466	0.197084	0.359716	0.365171	0.610594	0.607197	0.77644	0.75583	0.844673	0.834759
109.6	0.000166	0	0.201122	0.197174	0.359754	0.365373	0.611678	0.60757	0.77683	0.756262	0.846143	0.83529
109.8	0.000164	0	0.201437	0.197263	0.360562	0.365574	0.612403	0.607942	0.77749	0.756692	0.847596	0.83582
110	0.000165	0	0.2014	0.197352	0.361437	0.365775	0.612921	0.608313	0.77853	0.757121	0.848643	0.836347
110.2	0.000167	0	0.202162	0.197441	0.361634	0.365975	0.613906	0.608682	0.77954	0.757548	0.849583	0.836873
110.4	0.000165	0	0.203056	0.197529	0.36193	0.366174	0.615357	0.609051	0.77923	0.757974	0.850598	0.837397
110.6	0.000169	0	0.20315	0.197616	0.3627	0.366372	0.616024	0.609417	0.77929	0.758398	0.851227	0.837919
110.8	0.000169	0	0.203556	0.197704	0.362491	0.366569	0.616471	0.609783	0.77994	0.758821	0.852348	0.838439
111	0.000169	0	0.204006	0.197791	0.363623	0.366766	0.61735	0.610147	0.78014	0.759242	0.853744	0.838958
111.2	0.000166	0	0.202995	0.197877	0.363918	0.366962	0.619011	0.610511	0.78127	0.759661	0.854004	0.839475
111.4	0.00017	0	0.202195	0.197964	0.363866	0.367158	0.620021	0.610872	0.78173	0.760079	0.854952	0.83999
111.6	0.000169	0	0.204049	0.198049	0.364777	0.367352	0.620704	0.611233	0.78234	0.760495	0.855583	0.840504
111.8	0.000169	0	0.204496	0.198135	0.365453	0.367546	0.621283	0.611592	0.78286	0.76091	0.855749	0.841015
112	0.000169	0	0.20498	0.19822	0.365626	0.367739	0.621613	0.611951	0.78285	0.761324	0.855622	0.841525
112.2	0.000169	0	0.20595	0.198305	0.365232	0.367932	0.62171	0.612307	0.78392	0.761736	0.856235	0.842034
112.4	0.000169	0	0.205767	0.198389	0.365372	0.368124	0.621815	0.612663	0.78403	0.762146	0.857325	0.84254
112.6	0.000171	0	0.205201	0.198473	0.365677	0.368315	0.622078	0.613018	0.78451	0.762555	0.857711	0.843045
112.8	0.00017	0	0.205641	0.198557	0.365642	0.368505	0.622197	0.613371	0.78519	0.762962	0.858554	0.843548
113	0.000167	0	0.205427	0.19864	0.365906	0.368694	0.623137	0.613723	0.78648	0.763368	0.859169	0.84405
113.2	0.000167	0	0.204609	0.198723	0.366773	0.368883	0.623708	0.614073	0.7878	0.763772	0.859891	0.84455
113.4	0.000167	0	0.204578	0.198806	0.366946	0.369071	0.623551	0.614423	0.78862	0.764175	0.860965	0.845048
113.6	0.000162	0	0.205208	0.198888	0.366886	0.369259	0.623619	0.614771	0.78913	0.764576	0.861812	0.845544
113.8	0.000165	0	0.205438	0.19897	0.367122	0.369446	0.623329	0.615119	0.79016	0.764976	0.862253	0.846039
114	0.000165	0	0.206052	0.199051	0.36744	0.369632	0.623755	0.615464	0.79109	0.765375	0.863295	0.846532
114.2	0.000162	0	0.206377	0.199133	0.367037	0.369817	0.625042	0.615809	0.79157	0.765772	0.863314	0.847024
114.4	0.000162	0	0.206107	0.199213	0.367272	0.370002	0.625911	0.616153	0.79234	0.766167	0.864385	0.847513
114.6	0.000163	0	0.206282	0.199294	0.367129	0.370186	0.626473	0.616495	0.79343	0.766562	0.865418	0.848002
114.8	0.000158	0	0.20646	0.199374	0.366864	0.370369	0.626842	0.616836	0.79432	0.766954	0.866595	0.848488
115	0.00016	0	0.20563	0.199454	0.367316	0.370551	0.627569	0.617176	0.79486	0.767345	0.867302	0.848973
115.2	0.000159	0	0.205822	0.199533	0.367593	0.370733	0.628478	0.617515	0.79572	0.767735	0.867966	0.849456
115.4	0.00016	0	0.206213	0.199612	0.367229	0.370915	0.628621	0.617853	0.7965	0.768124	0.868771	0.849938
115.6	0.000161	0	0.207441	0.199691	0.368238	0.371095	0.628927	0.618189	0.79709	0.768511	0.868977	0.850418
115.8	0.000168	0	0.207513	0.19977	0.368514	0.371275	0.628863	0.618525	0.79723	0.768896	0.869484	0.850896
116	0.000168	0	0.208672	0.199848	0.36878	0.371454	0.629432	0.618859	0.79796	0.76928	0.869934	0.851373
116.2	0.000168	0	0.208916	0.199926	0.368983	0.371633	0.630037	0.619192	0.79794	0.769663	0.871073	0.851848
116.4	0.000167	0	0.209028	0.200003	0.369738	0.37181	0.630175	0.619524	0.79834	0.770044	0.871826	0.852322
116.6	0.000169	0	0.209006	0.20008	0.37023	0.371988	0.631066	0.619854	0.79941	0.770424	0.872474	0.852794
116.8	0.000169	0	0.208706	0.200157	0.370654	0.372164	0.631737	0.620184	0.80048	0.770803	0.873635	0.853264
117	0.000173	0	0.208296	0.200233	0.371123	0.37234	0.632281	0.620512	0.80209	0.77118	0.874032	0.853733
117.2	0.000174	0	0.208763	0.20031	0.37116	0.372515	0.632516	0.62084	0.80247	0.771556	0.875043	0.854201
117.4	0.000173	0	0.210163	0.200385	0.371311	0.37269	0.633152	0.621166	0.80328	0.77193	0.876266	0.854666
117.6	0.000175	0	0.210152	0.200461	0.371037	0.372864	0.634682	0.621491	0.80379	0.772303	0.877924	0.85513
117.8	0.000175	0	0.210069	0.200536	0.371074	0.373037	0.63583	0.621815	0.80451	0.772675	0.87895	0.855593
118	0.000171	0	0.210235	0.200611	0.371297	0.373209	0.636811	0.622138	0.80506	0.773045	0.880307	0.856054
118.2	0.000169	0	0.210059	0.200685	0.3712	0.373381	0.637513	0.622459	0.80566	0.773414	0.881138	0.856513
118.4	0.000169	0	0.209847	0.200759	0.37141	0.373553	0.637932	0.62278	0.80632	0.773782	0.882555	0.856971
118.6	0.00017	0	0.210013	0.200833	0.37177	0.373723	0.638383	0.623099	0.80712	0.774148	0.88347	0.857428
118.8	0.000169	0	0.209604	0.200907	0.372098	0.373893	0.638737	0.623418	0.80746	0.774513	0.884301	0.857883
119	0.000171	0	0.209307	0.20098	0.372539	0.374063	0.639188	0.623735	0.80793	0.774876	0.885123	0.858336
119.2	0.000171	0	0.209648	0.201053	0.373246	0.374231	0.639751	0.624051	0.80796	0.775238	0.885968	0.858788
119.4	0.000174	0	0.209702	0.201126	0.37325	0.374399	0.64028	0.624366	0.8085	0.775599	0.886314	0.859238
119.6	0.000179	0	0.209393	0.201198	0.374011	0.374567	0.640639	0.62468	0.80872	0.775959	0.886907	0.859687
119.8	0.000183	0	0.209522	0.20127	0.374565	0.374734	0.64092	0.624993	0.80871	0.776317	0.887556	0.860134
119.99	0.000183	0	0.209518	0.201342	0.37508	0.3749	0.641289	0.625305	0.80896	0.776674	0.887871	0.86058
120.19	0.000183	0	0.209518	0.20141	0.37508	0.375057	0.641289	0.625622	0.80896	0.777012	0.887871	0.861
120.39	0.000183	0	0.21062	0.200554	0.37608	0.373673	0.643457	0.623487	0.81081	0.774201	0.889322	0.858145
120.59	0.000183	0	0.211353	0.199702	0.376299	0.372294	0.645882	0.621359	0.81263	0.7714	0.891201	0.855299
120.79	0.000183	0	0.212089	0.198853	0.37702	0.37092	0.647911	0.619238	0.81428	0.768609	0.892871	0.852463
120.99	0.000184	0	0.212249	0.198009	0.378296	0.369551	0.651006	0.617124	0.81622	0.765829	0.894584	0.849637
121.19	0.000184	0	0.212811	0.197167	0.379816	0.368187	0.653388	0.615018	0.81872	0.763058	0.896554	0.846819
121.39	0.000184	0	0.212982	0.19633	0.380761	0.366829	0.656059	0.612919	0.8208	0.760298	0.89839	0.844012
121.59	0.000184	0	0.212436	0.195496	0.381671	0.365475	0.658234	0.610827	0.82286	0.757547	0.900541	0.841213
121.79	0.000184	0	0.212428	0.194665	0.382574	0.364126	0.6602	0.608742	0.82484	0.754807	0.902428	0.838424
121.99	0.000184	0	0.212171	0.193838	0.38328	0.362783	0.661773	0.606664	0.82608	0.752076	0.904006	0.835643
122.19	0.000183	0	0.211676	0.193015	0.383191	0.361444	0.663036	0.604594	0.82694	0.749355	0.906054	0.832873
122.39	0.000183	0	0.210908	0.192195	0.382633	0.36011	0.663331	0.60253	0.82744	0.746644	0.907489	0.830111
122.59	0.000182	0	0.210179	0.191378	0.382418	0.358781	0.663661	0.600474	0.82731	0.743943	0.907592	0.827358
122.79	0.000183	0	0.209968	0.190565	0.382734	0.357458	0.663565	0.598424	0.82704	0.741252	0.908497	0.824615
122.99	0.000183	0	0.209624	0.189756	0.382576	0.356138	0.663399	0.596382	0.8268	0.73857	0.908449	0.821881
123.19	0.000184	0	0.20891	0.188949	0.382436	0.354824	0.663053	0.594346	0.82618	0.735898	0.908127	0.819155
123.39	0.000185	0	0.208642	0.188147	0.38215	0.353515	0.662904	0.592318	0.82555	0.733236	0.907374	0.816439
123.59	0.000185	0	0.208142	0.187347	0.381527	0.35221	0.662157	0.590296	0.82472	0.730583	0.906755	0.813732
123.79	0.000185	0	0.207602	0.186552	0.380807	0.350911	0.661986	0.588281	0.82455	0.72794	0.905498	0.811034
123.99	0.000184	0	0.206978	0.185759	0.379806	0.349616	0.6613	0.586274	0.8235	0.725306	0.903885	0.808345
124.19	0.000185	0	0.206127	0.18497	0.379005	0.348326	0.661193	0.584273	0.82235	0.722682	0.902755	0.805664
124.39	0.000185	0	0.206257	0.184184	0.378342	0.34704	0.660756	0.582278	0.8215	0.720068	0.901833	0.802993
124.59	0.000185	0	0.205453	0.183402	0.377583	0.34576	0.660033	0.580291	0.82	0.717463	0.900359	0.80033
124.79	0.000186	0	0.204844	0.182622	0.377212	0.344484	0.658297	0.578311	0.81814	0.714867	0.898527	0.797676
124.99	0.000186	0	0.20422	0.181847	0.376923	0.343213	0.65778	0.576337	0.8171	0.712281	0.897075	0.795031
125.19	0.000186	0	0.203662	0.181074	0.376204	0.341946	0.656141	0.57437	0.81576	0.709704	0.89554	0.792395
125.39	0.000186	0	0.202367	0.180305	0.374665	0.340684	0.654883	0.572409	0.81352	0.707137	0.894179	0.789768
125.59	0.000187	0	0.201536	0.179539	0.373767	0.339427	0.652818	0.570456	0.81174	0.704579	0.892619	0.787149
125.79	0.000187	0	0.201438	0.178776	0.372793	0.338175	0.651189	0.568509	0.80941	0.70203	0.891	0.784539
125.99	0.000187	0	0.20016	0.178016	0.371837	0.336927	0.649704	0.566568	0.8063	0.69949	0.888874	0.781938
126.19	0.000187	0	0.19914	0.17726	0.370205	0.335683	0.647753	0.564634	0.80378	0.696959	0.887353	0.779345
126.39	0.000187	0	0.197654	0.176507	0.368772	0.334445	0.645634	0.562707	0.80101	0.694438	0.884915	0.776761
126.59	0.000187	0	0.197263	0.175757	0.367961	0.333211	0.643709	0.560787	0.798	0.691925	0.882456	0.774185
126.79	0.000187	0	0.196389	0.175011	0.367074	0.331981	0.641784	0.558873	0.79546	0.689422	0.88038	0.771618
126.99	0.000187	0	0.195369	0.174267	0.365286	0.330756	0.639623	0.556965	0.79282	0.686928	0.876717	0.769059
127.19	0.000187	0	0.194375	0.173527	0.364356	0.329535	0.63794	0.555064	0.7903	0.684443	0.873349	0.766509
127.39	0.000187	0	0.192735	0.17279	0.36313	0.328319	0.635954	0.55317	0.78757	0.681967	0.870373	0.763968
127.59	0.000187	0	0.191005	0.172055	0.36214	0.327108	0.633494	0.551282	0.78488	0.6795	0.866633	0.761434
127.79	0.000187	0	0.189466	0.171325	0.36161	0.325901	0.631606	0.5494	0.7827	0.677041	0.86308	0.75891
127.99	0.000187	0	0.188046	0.170597	0.359865	0.324698	0.629477	0.547525	0.77948	0.674592	0.859379	0.756393
128.19	0.000188	0	0.187506	0.169872	0.358648	0.3235	0.628029	0.545656	0.77685	0.672152	0.85606	0.753885
128.39	0.000187	0	0.186501	0.16915	0.356571	0.322306	0.625843	0.543794	0.77349	0.66972	0.852893	0.751385
128.59	0.000187	0	0.185318	0.168432	0.355177	0.321117	0.623503	0.541938	0.76993	0.667297	0.849255	0.748894
128.79	0.000188	0	0.184172	0.167716	0.353325	0.319932	0.620312	0.540088	0.76621	0.664883	0.846048	0.746411
128.99	0.000188	0	0.183295	0.167004	0.351347	0.318751	0.618126	0.538245	0.7633	0.662478	0.842591	0.743936
129.19	0.000188	0	0.182134	0.166294	0.349036	0.317575	0.615629	0.536408	0.75929	0.660081	0.839186	0.741469
129.39	0.000189	0	0.181222	0.165588	0.347409	0.316403	0.612202	0.534577	0.75551	0.657693	0.835746	0.73901
129.59	0.00019	0	0.180688	0.164884	0.346068	0.315236	0.609056	0.532752	0.75195	0.655313	0.831913	0.73656
129.79	0.00019	0	0.179874	0.164184	0.344306	0.314072	0.60662	0.530934	0.74852	0.652943	0.828886	0.734117
129.99	0.000189	0	0.178597	0.163486	0.342024	0.312914	0.603974	0.529122	0.74469	0.650581	0.825324	0.731683
130.19	0.000189	0	0.177545	0.162792	0.339919	0.311759	0.601117	0.527316	0.74082	0.648227	0.821793	0.729257
130.39	0.000189	0	0.176448	0.1621	0.337951	0.310608	0.598132	0.525516	0.73711	0.645882	0.817908	0.726839
130.59	0.000189	0	0.176808	0.161411	0.336337	0.309462	0.595337	0.523723	0.73286	0.643545	0.814613	0.724429
130.79	0.000189	0	0.175828	0.160726	0.334368	0.30832	0.59169	0.521935	0.72955	0.641217	0.810972	0.722027
130.99	0.000188	0	0.175499	0.160043	0.332961	0.307183	0.588279	0.520154	0.72585	0.638897	0.806826	0.719633
131.19	0.000188	0	0.174549	0.159363	0.33188	0.306049	0.585285	0.518378	0.7218	0.636586	0.803306	0.717246
131.39	0.000188	0	0.173582	0.158686	0.331102	0.30492	0.581658	0.516609	0.71826	0.634283	0.799503	0.714868
131.59	0.000189	0	0.172751	0.158012	0.329701	0.303794	0.578804	0.514846	0.71474	0.631988	0.796016	0.712498
131.79	0.000189	0	0.172129	0.15734	0.328141	0.302673	0.57592	0.513089	0.71121	0.629702	0.79267	0.710135
131.99	0.000189	0	0.171147	0.156672	0.325575	0.301557	0.573162	0.511338	0.70727	0.627424	0.78931	0.70778
132.19	0.000189	0	0.170677	0.156006	0.323864	0.300444	0.570816	0.509592	0.70366	0.625154	0.785877	0.705434
132.39	0.000189	0	0.169628	0.155344	0.321431	0.299335	0.567847	0.507853	0.69971	0.622892	0.78245	0.703094
132.59	0.00019	0	0.168704	0.154684	0.320052	0.298231	0.56553	0.50612	0.69635	0.620639	0.778386	0.700763
132.79	0.00019	0	0.168212	0.154027	0.318606	0.29713	0.562664	0.504392	0.69253	0.618393	0.774732	0.69844
132.99	0.000191	0	0.167288	0.153372	0.316389	0.296034	0.560463	0.502671	0.6894	0.616156	0.771162	0.696124
133.19	0.000191	0	0.166538	0.152721	0.314923	0.294941	0.558401	0.500955	0.68577	0.613927	0.767528	0.693815
133.39	0.000191	0	0.165829	0.152072	0.314403	0.293853	0.555061	0.499245	0.68264	0.611706	0.763823	0.691515
133.59	0.000191	0	0.16456	0.151426	0.312801	0.292768	0.552787	0.497541	0.67949	0.609493	0.760178	0.689222
133.79	0.000191	0	0.163034	0.150782	0.310514	0.291688	0.550613	0.495843	0.67657	0.607288	0.756888	0.686936
133.99	0.000191	0	0.161625	0.150142	0.308656	0.290612	0.548097	0.494151	0.67247	0.605091	0.752964	0.684659
134.19	0.000192	0	0.160425	0.149504	0.307937	0.289539	0.545686	0.492464	0.66863	0.602902	0.74799	0.682388
134.39	0.000191	0	0.159558	0.148869	0.307347	0.288471	0.542379	0.490783	0.66526	0.600721	0.744031	0.680126
134.59	0.000191	0	0.15926	0.148236	0.306527	0.287406	0.539605	0.489108	0.66103	0.598548	0.740871	0.677871
134.79	0.000191	0	0.158416	0.147607	0.304816	0.286346	0.536127	0.487439	0.65834	0.596382	0.736865	0.675623
134.99	0.000191	0	0.157174	0.14698	0.304361	0.285289	0.532613	0.485775	0.6546	0.594225	0.732826	0.673383
135.19	0.000192	0	0.156029	0.146355	0.30311	0.284236	0.529524	0.484117	0.65125	0.592075	0.729107	0.67115
135.39	0.000193	0	0.154604	0.145733	0.302491	0.283188	0.526729	0.482465	0.64813	0.589933	0.725498	0.668924
135.59	0.000193	0	0.154055	0.145114	0.30058	0.282143	0.524033	0.480818	0.64415	0.587799	0.722468	0.666706
135.79	0.000192	0	0.153181	0.144498	0.298802	0.281101	0.520964	0.479177	0.64042	0.585672	0.718538	0.664496
135.99	0.000192	0	0.152248	0.143884	0.297098	0.280064	0.518456	0.477542	0.63729	0.583553	0.715468	0.662292
136.19	0.000191	0	0.151467	0.143273	0.295086	0.279031	0.515414	0.475912	0.634	0.581442	0.711548	0.660096
136.39	0.00019	0	0.150949	0.142664	0.293134	0.278001	0.51259	0.474288	0.63079	0.579339	0.708092	0.657907
136.59	0.000189	0	0.150574	0.142058	0.291641	0.276975	0.510412	0.472669	0.62768	0.577243	0.704393	0.655726
136.79	0.000189	0	0.150385	0.141454	0.290309	0.275953	0.508254	0.471056	0.62394	0.575155	0.700799	0.653552
136.99	0.000188	0	0.150093	0.140853	0.288718	0.274935	0.506043	0.469448	0.6212	0.573074	0.697053	0.651384
137.19	0.000188	0	0.149428	0.140255	0.286815	0.27392	0.503579	0.467845	0.61803	0.571001	0.693843	0.649225
137.39	0.000188	0	0.14884	0.139659	0.285701	0.27291	0.501549	0.466249	0.6145	0.568935	0.690866	0.647072
137.59	0.000188	0	0.147713	0.139066	0.283504	0.271902	0.499873	0.464657	0.61076	0.566877	0.687144	0.644926
137.79	0.000188	0	0.146696	0.138475	0.281451	0.270899	0.497383	0.463071	0.6074	0.564826	0.683578	0.642788
137.99	0.000188	0	0.14665	0.137887	0.280359	0.269899	0.495086	0.461491	0.60364	0.562782	0.679618	0.640656
138.19	0.000188	0	0.146462	0.137301	0.279442	0.268903	0.492826	0.459916	0.60028	0.560746	0.675548	0.638532
138.39	0.000189	0	0.145636	0.136718	0.278886	0.267911	0.490344	0.458346	0.59721	0.558718	0.672848	0.636415
138.59	0.00019	0	0.145063	0.136137	0.277527	0.266923	0.487923	0.456782	0.59446	0.556696	0.66951	0.634304
138.79	0.000191	0	0.144014	0.135559	0.276095	0.265938	0.48537	0.455223	0.59153	0.554683	0.666163	0.632201
138.99	0.000191	0	0.142638	0.134983	0.275155	0.264956	0.482165	0.453669	0.58857	0.552676	0.663359	0.630105
139.19	0.000192	0	0.141662	0.134409	0.273592	0.263979	0.479646	0.452121	0.58599	0.550676	0.660494	0.628016
139.39	0.000193	0	0.140951	0.133838	0.272222	0.263004	0.477225	0.450577	0.58242	0.548684	0.656995	0.625933
139.59	0.000193	0	0.140967	0.13327	0.270558	0.262034	0.47505	0.44904	0.57881	0.546699	0.653219	0.623858
139.79	0.000193	0	0.139724	0.132703	0.268949	0.261067	0.472898	0.447507	0.57552	0.544721	0.649933	0.621789
139.99	0.000193	0	0.138434	0.13214	0.268293	0.260104	0.47048	0.44598	0.57217	0.542751	0.646895	0.619727
140.19	0.000193	0	0.137075	0.131578	0.267093	0.259144	0.46792	0.444457	0.56883	0.540787	0.642667	0.617672
140.39	0.000193	0	0.136318	0.131019	0.266382	0.258188	0.465674	0.44294	0.56616	0.538831	0.639365	0.615624
140.59	0.000193	0	0.135778	0.130463	0.265151	0.257235	0.463197	0.441429	0.5634	0.536881	0.635785	0.613583
140.79	0.000192	0	0.134779	0.129908	0.264198	0.256286	0.461442	0.439922	0.56043	0.534939	0.63257	0.611548
140.99	0.000192	0	0.134771	0.129357	0.263238	0.25534	0.45932	0.438421	0.55779	0.533004	0.629028	0.609521
141.19	0.000192	0	0.133688	0.128807	0.261574	0.254398	0.457228	0.436924	0.55394	0.531076	0.626903	0.6075
141.39	0.000191	0	0.133194	0.12826	0.261144	0.253459	0.455621	0.435433	0.55093	0.529154	0.6235	0.605485
141.59	0.000192	0	0.13176	0.127715	0.259605	0.252524	0.453342	0.433947	0.54772	0.52724	0.62023	0.603477
141.79	0.000192	0	0.131531	0.127172	0.258087	0.251592	0.450624	0.432466	0.54558	0.525332	0.616358	0.601476
141.99	0.000192	0	0.131388	0.126632	0.257096	0.250663	0.449295	0.43099	0.54269	0.523432	0.613844	0.599482
142.19	0.000193	0	0.130831	0.126094	0.255767	0.249738	0.446989	0.429519	0.53984	0.521538	0.611069	0.597494
142.39	0.000193	0	0.130238	0.125558	0.254545	0.248817	0.44444	0.428053	0.5371	0.519652	0.607998	0.595513
142.59	0.000194	0	0.12975	0.125025	0.252658	0.247899	0.44209	0.426592	0.53488	0.517772	0.605085	0.593538
142.79	0.000194	0	0.128889	0.124494	0.251576	0.246984	0.439453	0.425136	0.53209	0.515898	0.603186	0.59157
142.99	0.000194	0	0.127988	0.123965	0.249624	0.246072	0.435982	0.423685	0.52971	0.514032	0.600579	0.589609
143.19	0.000194	0	0.127765	0.123438	0.247915	0.245164	0.433985	0.422239	0.52671	0.512172	0.597531	0.587654
143.39	0.000195	0	0.127486	0.122914	0.246243	0.24426	0.432468	0.420797	0.5236	0.510319	0.594801	0.585705
143.59	0.000194	0	0.127387	0.122392	0.24485	0.243358	0.430305	0.419361	0.52043	0.508473	0.592357	0.583763
143.79	0.000194	0	0.126635	0.121872	0.243919	0.24246	0.428165	0.41793	0.51757	0.506634	0.590095	0.581827
143.99	0.000194	0	0.125523	0.121354	0.243409	0.241566	0.425782	0.416504	0.51484	0.504801	0.586784	0.579898
144.19	0.000194	0	0.124944	0.120838	0.241681	0.240674	0.42388	0.415082	0.51279	0.502975	0.583793	0.577975
144.39	0.000195	0	0.123976	0.120325	0.240402	0.239786	0.421424	0.413665	0.51088	0.501155	0.581477	0.576059
144.59	0.000195	0	0.122487	0.119814	0.239514	0.238901	0.419581	0.412253	0.5092	0.499342	0.579261	0.574149
144.79	0.000195	0	0.122007	0.119305	0.238471	0.23802	0.417825	0.410846	0.50666	0.497535	0.576681	0.572245
144.99	0.000195	0	0.121463	0.118798	0.237848	0.237141	0.415503	0.409444	0.50367	0.495736	0.573988	0.570347
145.19	0.000195	0	0.12013	0.118293	0.237079	0.236266	0.413151	0.408047	0.50042	0.493942	0.570934	0.568456
145.39	0.000195	0	0.119162	0.117791	0.236457	0.235395	0.410584	0.406654	0.49875	0.492155	0.567706	0.566571
145.59	0.000196	0	0.117723	0.11729	0.235412	0.234526	0.408921	0.405266	0.49551	0.490375	0.564749	0.564693
145.79	0.000197	0	0.117467	0.116792	0.234418	0.23366	0.407264	0.403883	0.49312	0.488601	0.561619	0.56282
145.99	0.000198	0	0.116802	0.116296	0.233888	0.232798	0.405609	0.402504	0.48968	0.486833	0.559543	0.560954
146.19	0.000198	0	0.116385	0.115802	0.232453	0.231939	0.402929	0.401131	0.48699	0.485072	0.55649	0.559094
146.39	0.000198	0	0.115627	0.11531	0.231744	0.231083	0.401219	0.399761	0.48426	0.483317	0.552971	0.55724
146.59	0.000198	0	0.114898	0.11482	0.231052	0.230231	0.399649	0.398397	0.48156	0.481568	0.550422	0.555392
146.79	0.000198	0	0.114377	0.114332	0.230849	0.229381	0.397411	0.397037	0.47841	0.479826	0.547678	0.553551
146.99	0.000197	0	0.114418	0.113846	0.2291	0.228535	0.395224	0.395682	0.47535	0.47809	0.544498	0.551715
147.19	0.000197	0	0.114681	0.113363	0.227857	0.227691	0.393805	0.394332	0.47233	0.476361	0.542469	0.549886
147.39	0.000197	0	0.114183	0.112881	0.22668	0.226851	0.391534	0.392986	0.46949	0.474637	0.54027	0.548062
147.59	0.000196	0	0.114036	0.112402	0.225547	0.226014	0.388859	0.391644	0.46708	0.47292	0.537419	0.546245
147.79	0.000196	0	0.113583	0.111924	0.22487	0.22518	0.387481	0.390308	0.46451	0.471209	0.534908	0.544434
147.99	0.000197	0	0.112433	0.111449	0.223429	0.224349	0.385326	0.388976	0.46164	0.469505	0.531883	0.542629
148.19	0.000197	0	0.111662	0.110975	0.221846	0.223521	0.383641	0.387648	0.46004	0.467806	0.529719	0.540829
148.39	0.000197	0	0.110352	0.110504	0.220481	0.222696	0.381104	0.386325	0.4577	0.466114	0.527704	0.539036
148.59	0.000197	0	0.109428	0.110034	0.219692	0.221874	0.379046	0.385006	0.45586	0.464427	0.525642	0.537249
148.79	0.000197	0	0.109347	0.109567	0.218136	0.221056	0.376792	0.383692	0.45276	0.462747	0.523191	0.535467
148.99	0.000197	0	0.108462	0.109101	0.217423	0.22024	0.374421	0.382383	0.45002	0.461073	0.52099	0.533692
149.19	0.000197	0	0.107252	0.108638	0.216963	0.219427	0.372429	0.381078	0.44777	0.459405	0.517964	0.531922
149.39	0.000197	0	0.106144	0.108176	0.215192	0.218618	0.370844	0.379777	0.44598	0.457743	0.515928	0.530158
149.59	0.000197	0	0.104621	0.107717	0.214321	0.217811	0.36941	0.378481	0.44286	0.456087	0.513288	0.5284
149.79	0.000196	0	0.104241	0.107259	0.213529	0.217007	0.367693	0.377189	0.44081	0.454437	0.510972	0.526648
149.99	0.000196	0	0.103713	0.106803	0.212843	0.216206	0.365586	0.375902	0.43921	0.452793	0.508361	0.524902
150.19	0.000196	0	0.102935	0.10635	0.212126	0.215409	0.364125	0.374619	0.43822	0.451155	0.506073	0.523161
150.39	0.000196	0	0.102798	0.105898	0.211068	0.214614	0.36338	0.37334	0.4366	0.449523	0.503362	0.521427
150.59	0.000197	0	0.102623	0.105448	0.210603	0.213822	0.362269	0.372066	0.43483	0.447896	0.501262	0.519698
150.79	0.000196	0	0.102325	0.105	0.209514	0.213033	0.361077	0.370796	0.43336	0.446276	0.498786	0.517975
150.99	0.000197	0	0.102023	0.104554	0.208482	0.212247	0.359518	0.36953	0.43141	0.444662	0.496148	0.516257
151.19	0.000196	0	0.10151	0.10411	0.207673	0.211463	0.357864	0.368269	0.42967	0.443053	0.494274	0.514545
151.39	0.000196	0	0.101378	0.103667	0.207117	0.210683	0.356475	0.367012	0.42834	0.44145	0.491686	0.512839
151.59	0.000196	0	0.101181	0.103227	0.206367	0.209906	0.355821	0.36576	0.42686	0.439853	0.489489	0.511139
151.79	0.000196	0	0.100799	0.102789	0.205422	0.209131	0.354499	0.364511	0.42419	0.438262	0.487496	0.509444
151.99	0.000197	0	0.100062	0.102352	0.203933	0.208359	0.352828	0.363267	0.42212	0.436676	0.484472	0.507754
152.19	0.000197	0	0.09977	0.101917	0.202994	0.20759	0.351518	0.362027	0.42057	0.435096	0.482351	0.506071
152.39	0.000197	0	0.100128	0.101484	0.201922	0.206824	0.349575	0.360792	0.41787	0.433522	0.480117	0.504393
152.59	0.000198	0	0.100088	0.101053	0.20145	0.206061	0.34828	0.35956	0.41587	0.431954	0.477875	0.50272
152.79	0.000198	0	0.099426	0.100624	0.200757	0.205301	0.346929	0.358333	0.41344	0.430391	0.475837	0.501053
152.99	0.000197	0	0.098447	0.100196	0.19978	0.204543	0.346168	0.35711	0.41133	0.428834	0.473926	0.499392
153.19	0.000198	0	0.097548	0.09977	0.198756	0.203788	0.345305	0.355891	0.40958	0.427283	0.471762	0.497736
153.39	0.000198	0	0.096614	0.099347	0.197469	0.203036	0.344419	0.354676	0.40712	0.425737	0.469563	0.496086
153.59	0.000198	0	0.095919	0.098925	0.196947	0.202287	0.342659	0.353466	0.40452	0.424197	0.467795	0.494441
153.79	0.000198	0	0.095688	0.098504	0.195864	0.201541	0.341102	0.352259	0.40315	0.422662	0.466362	0.492801
153.99	0.000198	0	0.094882	0.098086	0.194976	0.200797	0.339706	0.351057	0.40207	0.421133	0.464753	0.491167
154.19	0.000199	0	0.093695	0.097669	0.193438	0.200056	0.338077	0.349859	0.40064	0.41961	0.463825	0.489538
154.39	0.000198	0	0.093073	0.097254	0.19179	0.199318	0.33679	0.348665	0.39865	0.418092	0.462172	0.487915
154.59	0.000199	0	0.092129	0.096841	0.191191	0.198582	0.335152	0.347475	0.39681	0.416579	0.460545	0.486297
154.79	0.000199	0	0.091828	0.09643	0.18948	0.19785	0.333489	0.346289	0.39486	0.415072	0.458342	0.484685
154.99	0.000198	0	0.091502	0.09602	0.188604	0.197119	0.33122	0.345107	0.39239	0.41357	0.455707	0.483078
155.19	0.000198	0	0.091384	0.095612	0.18744	0.196392	0.32955	0.343929	0.39061	0.412074	0.45455	0.481476
155.39	0.000198	0	0.091915	0.095206	0.186144	0.195667	0.327069	0.342755	0.38912	0.410583	0.452392	0.479879
155.59	0.000198	0	0.091576	0.094801	0.185101	0.194945	0.324794	0.341585	0.38657	0.409098	0.450414	0.478288
155.79	0.000198	0	0.091216	0.094399	0.183968	0.194226	0.322572	0.34042	0.38438	0.407618	0.447492	0.476702
155.99	0.000199	0	0.091869	0.093998	0.183423	0.193509	0.321495	0.339258	0.38269	0.406143	0.444979	0.475122
156.19	0.0002	0	0.091641	0.093598	0.183204	0.192795	0.319781	0.3381	0.38058	0.404674	0.443059	0.473546
156.39	0.0002	0	0.091582	0.093201	0.182636	0.192084	0.31859	0.336946	0.37865	0.40321	0.440669	0.471976
156.59	0.0002	0	0.091461	0.092805	0.182511	0.191375	0.317222	0.335796	0.3772	0.401751	0.438705	0.470411
156.79	0.000199	0	0.090671	0.09241	0.181921	0.190669	0.316359	0.33465	0.37576	0.400298	0.437063	0.468851
156.99	0.000199	0	0.090668	0.092018	0.181681	0.189965	0.316021	0.333507	0.37374	0.39885	0.435313	0.467296
157.19	0.0002	0	0.090787	0.091627	0.181889	0.189264	0.314372	0.332369	0.37141	0.397407	0.433845	0.465747
157.39	0.000201	0	0.089783	0.091238	0.18193	0.188566	0.313054	0.331235	0.36955	0.395969	0.4322	0.464203
157.59	0.000201	0	0.089173	0.09085	0.180809	0.18787	0.312214	0.330104	0.36797	0.394536	0.430567	0.462663
157.79	0.000201	0	0.088383	0.090464	0.179981	0.187177	0.310894	0.328978	0.36689	0.393109	0.429179	0.461129
157.99	0.000201	0	0.087561	0.09008	0.178941	0.186486	0.309729	0.327855	0.36574	0.391687	0.426866	0.4596
158.19	0.000202	0	0.086158	0.089697	0.177779	0.185798	0.30832	0.326736	0.36436	0.39027	0.425528	0.458076
158.39	0.000202	0	0.08639	0.089316	0.1765	0.185112	0.307023	0.325621	0.363	0.388858	0.423227	0.456557
158.59	0.000202	0	0.086017	0.088936	0.174876	0.184429	0.305541	0.324509	0.36153	0.387451	0.421015	0.455044
158.79	0.000203	0	0.085475	0.088559	0.17315	0.183749	0.303836	0.323402	0.35945	0.38605	0.418488	0.453535
158.99	0.000202	0	0.084866	0.088182	0.172606	0.18307	0.302208	0.322298	0.3577	0.384653	0.416561	0.452031
159.19	0.000203	0	0.084348	0.087808	0.17206	0.182395	0.301226	0.321198	0.35619	0.383261	0.41485	0.450532
159.39	0.000203	0	0.083953	0.087435	0.171177	0.181722	0.299301	0.320102	0.35497	0.381875	0.412128	0.449038
159.59	0.000203	0	0.082522	0.087063	0.170858	0.181051	0.298443	0.319009	0.35314	0.380493	0.410033	0.447549
159.79	0.000203	0	0.082216	0.086693	0.170451	0.180383	0.297948	0.31792	0.35178	0.379117	0.407644	0.446065
159.99	0.000204	0	0.082523	0.086325	0.170233	0.179718	0.297147	0.316835	0.34992	0.377745	0.406172	0.444586
160.19	0.000204	0	0.081825	0.085958	0.169786	0.179054	0.295661	0.315754	0.34803	0.376379	0.404881	0.443112
160.39	0.000203	0	0.081692	0.085593	0.169216	0.178394	0.294625	0.314676	0.3464	0.375017	0.403155	0.441643
160.59	0.000203	0	0.081985	0.08523	0.168718	0.177735	0.292855	0.313602	0.34527	0.37366	0.401709	0.440178
160.79	0.000203	0	0.08132	0.084868	0.168292	0.17708	0.291673	0.312532	0.34397	0.372308	0.40093	0.438719
160.99	0.000202	0	0.081013	0.084507	0.168084	0.176426	0.29048	0.311465	0.34259	0.370962	0.39927	0.437264
161.19	0.000202	0	0.081017	0.084148	0.167953	0.175775	0.289338	0.310402	0.34108	0.36962	0.398019	0.435814
161.39	0.000202	0	0.080273	0.08379	0.167332	0.175126	0.287974	0.309343	0.3394	0.368282	0.396758	0.434369
161.59	0.000202	0	0.079792	0.083434	0.166371	0.17448	0.287014	0.308287	0.33768	0.36695	0.395564	0.432929
161.79	0.000201	0	0.079604	0.08308	0.166096	0.173836	0.28574	0.307235	0.33631	0.365622	0.394533	0.431493
161.99	0.000201	0	0.079158	0.082727	0.165167	0.173195	0.284861	0.306186	0.33525	0.3643	0.393082	0.430062
162.19	0.000201	0	0.078667	0.082376	0.164492	0.172556	0.283526	0.305141	0.33379	0.362982	0.39202	0.428636
162.39	0.000201	0	0.079013	0.082026	0.163134	0.171919	0.281978	0.304099	0.33252	0.361669	0.389995	0.427215
162.59	0.000201	0	0.078194	0.081677	0.161608	0.171285	0.280958	0.303061	0.33063	0.36036	0.388724	0.425798
162.79	0.000201	0	0.077474	0.08133	0.160915	0.170653	0.279845	0.302027	0.32884	0.359057	0.387603	0.424386
162.99	0.000201	0	0.077107	0.080985	0.160426	0.170023	0.27896	0.300996	0.32775	0.357758	0.386441	0.422979
163.19	0.000201	0	0.076142	0.080641	0.159656	0.169395	0.278082	0.299969	0.32619	0.356463	0.38439	0.421577
163.39	0.000201	0	0.075652	0.080298	0.15893	0.16877	0.27698	0.298945	0.32455	0.355174	0.382565	0.420179
163.59	0.000201	0	0.075009	0.079957	0.158751	0.168148	0.275658	0.297925	0.32251	0.353889	0.380848	0.418786
163.79	0.000202	0	0.075142	0.079617	0.158555	0.167527	0.274308	0.296908	0.31985	0.352608	0.378949	0.417397
163.99	0.000203	0	0.075535	0.079279	0.158294	0.166909	0.273348	0.295895	0.3181	0.351333	0.377905	0.416013
164.19	0.000203	0	0.074792	0.078942	0.157377	0.166293	0.272051	0.294885	0.31664	0.350062	0.376215	0.414633
164.39	0.000202	0	0.074214	0.078607	0.156539	0.165679	0.270658	0.293878	0.31564	0.348795	0.374278	0.413259
164.59	0.000202	0	0.073719	0.078273	0.155751	0.165068	0.26935	0.292875	0.31504	0.347533	0.372498	0.411888
164.79	0.000202	0	0.072681	0.07794	0.155099	0.164459	0.268611	0.291876	0.3139	0.346276	0.372177	0.410523
164.99	0.000201	0	0.072225	0.077609	0.155255	0.163852	0.268107	0.290879	0.31259	0.345023	0.370301	0.409161
165.19	0.000201	0	0.072051	0.07728	0.155164	0.163247	0.267086	0.289887	0.31088	0.343775	0.369327	0.407805
165.39	0.000201	0	0.071457	0.076951	0.154662	0.162645	0.265614	0.288897	0.3091	0.342532	0.367977	0.406452
165.59	0.000201	0	0.070366	0.076624	0.154084	0.162045	0.264228	0.287911	0.30818	0.341292	0.366497	0.405105
165.79	0.000201	0	0.070224	0.076299	0.153741	0.161447	0.263749	0.286928	0.30668	0.340058	0.364604	0.403761
165.99	0.000201	0	0.07014	0.075975	0.153056	0.160851	0.262621	0.285949	0.30586	0.338827	0.363176	0.402423
166.19	0.000201	0	0.070161	0.075652	0.152616	0.160257	0.261529	0.284973	0.30412	0.337602	0.360798	0.401088
166.39	0.000202	0	0.069707	0.07533	0.151718	0.159666	0.260003	0.284001	0.30249	0.33638	0.359319	0.399758
166.59	0.000202	0	0.069518	0.07501	0.150967	0.159077	0.258644	0.283031	0.30082	0.335163	0.3585	0.398433
166.79	0.000202	0	0.069048	0.074692	0.151052	0.15849	0.257042	0.282065	0.29981	0.333951	0.357202	0.397112
166.99	0.000202	0	0.068616	0.074374	0.150522	0.157905	0.255205	0.281103	0.29924	0.332743	0.355855	0.395795
167.19	0.000203	0	0.06812	0.074058	0.15008	0.157322	0.254112	0.280143	0.29766	0.331539	0.354264	0.394482
167.39	0.000203	0	0.068305	0.073744	0.149503	0.156742	0.253221	0.279187	0.29612	0.330339	0.352539	0.393174
167.59	0.000203	0	0.068239	0.073431	0.149207	0.156163	0.251933	0.278234	0.29433	0.329144	0.350797	0.391871
167.79	0.000203	0	0.06823	0.073119	0.148568	0.155587	0.250761	0.277284	0.29279	0.327954	0.349361	0.390571
167.99	0.000203	0	0.068151	0.072808	0.148171	0.155013	0.250786	0.276338	0.29221	0.326767	0.348483	0.389276
168.19	0.000203	0	0.068008	0.072499	0.14721	0.154441	0.249832	0.275395	0.29087	0.325585	0.346887	0.387985
168.39	0.000203	0	0.068221	0.072191	0.146477	0.153871	0.248991	0.274455	0.28999	0.324407	0.345905	0.386699
168.59	0.000203	0	0.068287	0.071884	0.145707	0.153303	0.24875	0.273518	0.28857	0.323234	0.344802	0.385417
168.79	0.000204	0	0.068049	0.071579	0.144594	0.152738	0.248509	0.272585	0.28782	0.322064	0.344387	0.384139
168.99	0.000204	0	0.068282	0.071274	0.14405	0.152174	0.247881	0.271654	0.2872	0.320899	0.342812	0.382865
169.19	0.000204	0	0.068014	0.070972	0.142404	0.151612	0.247082	0.270727	0.28584	0.319738	0.341506	0.381595
169.39	0.000205	0	0.067527	0.07067	0.141396	0.151053	0.245937	0.269803	0.28477	0.318581	0.339851	0.38033
169.59	0.000206	0	0.067014	0.07037	0.140612	0.150496	0.244629	0.268882	0.28381	0.317429	0.338896	0.379069
169.79	0.000206	0	0.067172	0.070071	0.1398	0.14994	0.244457	0.267965	0.28262	0.31628	0.337678	0.377812
169.99	0.000206	0	0.066747	0.069773	0.139073	0.149387	0.243307	0.26705	0.28184	0.315136	0.336795	0.376559
170.19	0.000207	0	0.06601	0.069477	0.138692	0.148836	0.242094	0.266138	0.28086	0.313996	0.335198	0.375311
170.39	0.000207	0	0.065528	0.069182	0.137987	0.148286	0.24061	0.26523	0.27952	0.31286	0.334759	0.374066
170.59	0.000207	0	0.065539	0.068888	0.138393	0.147739	0.239536	0.264325	0.27857	0.311728	0.334042	0.372826
170.79	0.000207	0	0.064769	0.068595	0.138505	0.147194	0.238154	0.263423	0.27763	0.310601	0.332866	0.37159
170.99	0.000207	0	0.064598	0.068304	0.138194	0.146651	0.236835	0.262524	0.27644	0.309477	0.331655	0.370357
171.19	0.000207	0	0.064282	0.068014	0.137748	0.14611	0.235487	0.261628	0.27537	0.308357	0.330305	0.369129
171.39	0.000207	0	0.063919	0.067725	0.137373	0.145571	0.234418	0.260735	0.27451	0.307242	0.329093	0.367905
171.59	0.000207	0	0.063662	0.067437	0.137336	0.145033	0.233113	0.259845	0.27317	0.30613	0.32791	0.366686
171.79	0.000207	0	0.063705	0.06715	0.137333	0.144498	0.232128	0.258958	0.27154	0.305023	0.326433	0.36547
171.99	0.000206	0	0.063394	0.066865	0.137431	0.143965	0.232192	0.258074	0.27106	0.303919	0.324978	0.364258
172.19	0.000206	0	0.064103	0.066581	0.136594	0.143434	0.230943	0.257193	0.26997	0.30282	0.323014	0.36305
172.39	0.000205	0	0.06392	0.066298	0.136521	0.142904	0.230485	0.256315	0.26906	0.301724	0.321303	0.361846
172.59	0.000205	0	0.063457	0.066017	0.13506	0.142377	0.230098	0.255441	0.26753	0.300633	0.319879	0.360646
172.79	0.000205	0	0.062614	0.065736	0.133735	0.141852	0.228452	0.254569	0.26707	0.299545	0.318956	0.35945
172.99	0.000205	0	0.061674	0.065457	0.132688	0.141328	0.227775	0.2537	0.26617	0.298461	0.317771	0.358259
173.19	0.000204	0	0.061102	0.065179	0.131737	0.140807	0.226676	0.252834	0.26525	0.297382	0.316865	0.357071
173.39	0.000204	0	0.060222	0.064902	0.130876	0.140287	0.225767	0.251971	0.26513	0.296306	0.31629	0.355887
173.59	0.000204	0	0.059982	0.064626	0.13029	0.13977	0.225089	0.251111	0.26423	0.295234	0.316111	0.354707
173.79	0.000204	0	0.059347	0.064352	0.12907	0.139254	0.224639	0.250254	0.26313	0.294166	0.315197	0.35353
173.99	0.000204	0	0.058654	0.064078	0.128502	0.13874	0.224589	0.2494	0.26178	0.293101	0.314427	0.352358
174.19	0.000204	0	0.058696	0.063806	0.1272	0.138228	0.224378	0.248549	0.26053	0.292041	0.313052	0.35119
174.39	0.000203	0	0.058111	0.063535	0.126706	0.137718	0.224081	0.2477	0.25824	0.290985	0.312308	0.350025
174.59	0.000204	0	0.057286	0.063265	0.127107	0.13721	0.223846	0.246855	0.2573	0.289932	0.311782	0.348865
174.79	0.000204	0	0.056744	0.062996	0.126529	0.136703	0.223031	0.246012	0.25568	0.288883	0.31055	0.347708
174.99	0.000204	0	0.056437	0.062729	0.12622	0.136199	0.222378	0.245173	0.25426	0.287838	0.309691	0.346555
175.19	0.000204	0	0.055959	0.062462	0.125891	0.135696	0.221185	0.244336	0.25298	0.286797	0.308631	0.345406
175.39	0.000204	0	0.055654	0.062197	0.125446	0.135196	0.220638	0.243502	0.25153	0.285759	0.307431	0.344261
175.59	0.000205	0	0.055853	0.061932	0.125214	0.134697	0.220085	0.242671	0.24977	0.284725	0.305611	0.343119
175.79	0.000206	0	0.056138	0.061669	0.124755	0.1342	0.219782	0.241843	0.24849	0.283695	0.304025	0.341981
175.99	0.000206	0	0.056016	0.061407	0.124531	0.133704	0.219728	0.241017	0.24808	0.282669	0.302808	0.340847
176.19	0.000206	0	0.056388	0.061147	0.123893	0.133211	0.218553	0.240195	0.24644	0.281646	0.301736	0.339717
176.39	0.000206	0	0.055705	0.060887	0.123845	0.132719	0.217491	0.239375	0.24515	0.280627	0.301036	0.338591
176.59	0.000207	0	0.055013	0.060628	0.122509	0.13223	0.216184	0.238558	0.24429	0.279612	0.300338	0.337468
176.79	0.000207	0	0.054111	0.06037	0.122422	0.131742	0.214324	0.237744	0.24432	0.2786	0.299796	0.336349
176.99	0.000208	0	0.054152	0.060114	0.121885	0.131256	0.21374	0.236932	0.24426	0.277593	0.299269	0.335234
177.19	0.000208	0	0.053954	0.059859	0.122011	0.130771	0.212782	0.236123	0.2434	0.276588	0.29885	0.334122
177.39	0.000209	0	0.053154	0.059604	0.121478	0.130289	0.212004	0.235318	0.24245	0.275588	0.297834	0.333014
177.59	0.00021	0	0.052973	0.059351	0.121308	0.129808	0.211086	0.234514	0.24081	0.274591	0.297122	0.33191
177.79	0.00021	0	0.052905	0.059099	0.120608	0.129329	0.21053	0.233714	0.23918	0.273597	0.295505	0.330809
177.99	0.00021	0	0.053033	0.058848	0.120104	0.128852	0.209953	0.232916	0.23843	0.272607	0.294096	0.329712
178.19	0.00021	0	0.052917	0.058598	0.119319	0.128376	0.209121	0.232121	0.23746	0.271621	0.29217	0.328619
178.39	0.000209	0	0.052128	0.058349	0.119631	0.127903	0.208776	0.231329	0.23666	0.270639	0.291205	0.32753
178.59	0.000209	0	0.051534	0.058101	0.119457	0.127431	0.208243	0.23054	0.23651	0.269659	0.290433	0.326444
178.79	0.000209	0	0.051612	0.057854	0.119165	0.12696	0.207655	0.229753	0.23525	0.268684	0.289067	0.325361
178.99	0.000208	0	0.051142	0.057608	0.118999	0.126492	0.206904	0.228969	0.2344	0.267712	0.287972	0.324282
179.19	0.000208	0	0.050931	0.057364	0.118389	0.126025	0.206211	0.228187	0.23313	0.266743	0.286386	0.323207
179.39	0.000207	0	0.050531	0.05712	0.118178	0.12556	0.205699	0.227408	0.23204	0.265778	0.285717	0.322135
179.59	0.000207	0	0.050444	0.056877	0.117692	0.125097	0.205486	0.226632	0.2314	0.264817	0.284871	0.321067
179.79	0.000206	0	0.050216	0.056636	0.117011	0.124635	0.204665	0.225859	0.23089	0.263859	0.284214	0.320002
179.99	0.000206	0	0.050362	0.056395	0.11651	0.124175	0.204231	0.225088	0.22949	0.262904	0.283713	0.318941
180.19	0.000206	0	0.049973	0.056156	0.116158	0.123717	0.203201	0.224319	0.2284	0.261953	0.283514	0.317884
180.39	0.000206	0	0.049671	0.055917	0.115561	0.12326	0.202218	0.223554	0.22788	0.261005	0.283	0.31683
180.59	0.000206	0	0.049066	0.055679	0.114736	0.122806	0.201274	0.222791	0.2274	0.260061	0.28245	0.315779
180.79	0.000206	0	0.0478	0.055443	0.114178	0.122352	0.200613	0.22203	0.22717	0.25912	0.281269	0.314732
180.99	0.000207	0	0.047319	0.055207	0.113773	0.121901	0.200045	0.221273	0.22703	0.258183	0.280365	0.313689
181.19	0.000207	0	0.046621	0.054973	0.114235	0.121451	0.199207	0.220517	0.22647	0.257249	0.279039	0.312648
181.39	0.000207	0	0.04602	0.054739	0.11352	0.121003	0.198189	0.219765	0.22603	0.256318	0.278249	0.311612
181.59	0.000207	0	0.045981	0.054507	0.113288	0.120556	0.198243	0.219015	0.22503	0.255391	0.277424	0.310578
181.79	0.000208	0	0.046156	0.054275	0.112877	0.120112	0.197456	0.218267	0.22481	0.254467	0.27606	0.309549
181.99	0.000207	0	0.046685	0.054045	0.112447	0.119668	0.19672	0.217522	0.22473	0.253546	0.274554	0.308522
182.19	0.000206	0	0.046925	0.053815	0.112241	0.119227	0.19617	0.21678	0.22365	0.252629	0.273431	0.307499
182.39	0.000207	0	0.046599	0.053586	0.112339	0.118787	0.19582	0.21604	0.22289	0.251715	0.273702	0.30648
182.59	0.000207	0	0.045877	0.053359	0.112307	0.118348	0.195007	0.215302	0.22207	0.250805	0.27328	0.305463
182.79	0.000207	0	0.045567	0.053132	0.112361	0.117912	0.194539	0.214568	0.22091	0.249897	0.271955	0.30445
182.99	0.000207	0	0.044772	0.052906	0.112358	0.117477	0.193826	0.213835	0.22	0.248993	0.271089	0.303441
183.19	0.000206	0	0.045281	0.052681	0.112485	0.117043	0.193544	0.213105	0.21783	0.248092	0.270772	0.302435
183.39	0.000206	0	0.044991	0.052458	0.112923	0.116611	0.193355	0.212378	0.21666	0.247195	0.270632	0.301432
183.59	0.000207	0	0.044344	0.052235	0.112605	0.116181	0.192641	0.211653	0.21577	0.246301	0.270083	0.300432
183.79	0.000207	0	0.044516	0.052013	0.111984	0.115752	0.191451	0.210931	0.21381	0.245409	0.269528	0.299436
183.99	0.000207	0	0.044717	0.051792	0.111605	0.115325	0.19139	0.210211	0.21171	0.244522	0.269004	0.298443
184.19	0.000208	0	0.043897	0.051572	0.111389	0.114899	0.19084	0.209493	0.21067	0.243637	0.268395	0.297454
184.39	0.000209	0	0.043559	0.051353	0.110452	0.114475	0.190034	0.208778	0.20997	0.242756	0.267593	0.296467
184.59	0.000209	0	0.043109	0.051135	0.109004	0.114053	0.189716	0.208066	0.2094	0.241877	0.266815	0.295484
184.79	0.000209	0	0.042135	0.050917	0.108017	0.113632	0.18954	0.207356	0.20938	0.241002	0.265697	0.294505
184.99	0.000209	0	0.042543	0.050701	0.107289	0.113213	0.188533	0.206648	0.20959	0.24013	0.265055	0.293528
185.19	0.000209	0	0.043063	0.050486	0.106946	0.112795	0.187698	0.205943	0.20989	0.239262	0.263862	0.292555
185.39	0.000209	0	0.043033	0.050271	0.105908	0.112379	0.187084	0.20524	0.20916	0.238396	0.263181	0.291585
185.59	0.00021	0	0.043257	0.050058	0.10514	0.111964	0.186825	0.204539	0.20877	0.237534	0.261853	0.290618
185.79	0.000209	0	0.042708	0.049845	0.104386	0.111551	0.185475	0.203841	0.20881	0.236674	0.260788	0.289654
185.99	0.000208	0	0.043041	0.049633	0.103728	0.111139	0.185184	0.203145	0.20768	0.235818	0.260443	0.288694
186.19	0.000208	0	0.042289	0.049422	0.102955	0.110729	0.184032	0.202452	0.20653	0.234965	0.260013	0.287737
186.39	0.000208	0	0.041937	0.049212	0.102529	0.110321	0.183404	0.201761	0.20602	0.234115	0.259177	0.286782
186.59	0.000208	0	0.041628	0.049003	0.101756	0.109914	0.182484	0.201073	0.20539	0.233268	0.257325	0.285832
186.79	0.000209	0	0.041546	0.048795	0.101825	0.109508	0.181791	0.200386	0.20481	0.232424	0.255812	0.284884
186.99	0.000208	0	0.041625	0.048588	0.101544	0.109104	0.181028	0.199702	0.20424	0.231583	0.254754	0.283939
187.19	0.000208	0	0.04173	0.048381	0.101532	0.108701	0.179894	0.199021	0.20254	0.230745	0.254388	0.282998
187.39	0.000208	0	0.041078	0.048176	0.101722	0.1083	0.17954	0.198341	0.20189	0.229911	0.253803	0.282059
187.59	0.000208	0	0.040411	0.047971	0.101519	0.1079	0.178139	0.197664	0.20076	0.229079	0.253407	0.281124
187.79	0.000208	0	0.040255	0.047767	0.101009	0.107502	0.177291	0.19699	0.1998	0.22825	0.252464	0.280192
187.99	0.000207	0	0.039721	0.047565	0.101012	0.107106	0.177075	0.196317	0.19874	0.227424	0.251461	0.279263
188.19	0.000207	0	0.038817	0.047362	0.100437	0.10671	0.176605	0.195647	0.19834	0.226602	0.250874	0.278337
188.39	0.000206	0	0.038812	0.047161	0.099501	0.106317	0.176818	0.19498	0.19817	0.225782	0.250653	0.277414
188.59	0.000206	0	0.039007	0.046961	0.098565	0.105924	0.175985	0.194314	0.19783	0.224965	0.249986	0.276494
188.79	0.000207	0	0.038583	0.046761	0.098301	0.105533	0.175232	0.193651	0.19743	0.224151	0.249478	0.275577
188.99	0.000207	0	0.038856	0.046563	0.098588	0.105144	0.174639	0.19299	0.19737	0.22334	0.248088	0.274663
189.19	0.000207	0	0.038662	0.046365	0.099038	0.104756	0.173857	0.192331	0.19657	0.222532	0.246886	0.273753
189.39	0.000208	0	0.037687	0.046168	0.098764	0.104369	0.173551	0.191675	0.19536	0.221727	0.246565	0.272845
189.59	0.000208	0	0.036835	0.045972	0.098563	0.103984	0.172543	0.191021	0.19477	0.220925	0.245857	0.27194
189.79	0.000208	0	0.036187	0.045776	0.098211	0.103601	0.17272	0.190369	0.1944	0.220126	0.245335	0.271038
189.99	0.000209	0	0.036423	0.045582	0.097939	0.103218	0.172055	0.189719	0.19317	0.219329	0.244387	0.27014
190.19	0.000209	0	0.036211	0.045388	0.097202	0.102837	0.170901	0.189071	0.19259	0.218536	0.242644	0.269244
190.39	0.000209	0	0.037293	0.045196	0.097216	0.102458	0.17049	0.188426	0.19179	0.217745	0.241257	0.268351
190.59	0.00021	0	0.037021	0.045004	0.096671	0.10208	0.1704	0.187783	0.19077	0.216958	0.240411	0.267461
190.79	0.000209	0	0.03652	0.044812	0.0966	0.101703	0.170142	0.187142	0.18975	0.216173	0.239881	0.266575
190.99	0.000209	0	0.036523	0.044622	0.09607	0.101328	0.169151	0.186503	0.18909	0.215391	0.238547	0.265691
191.19	0.000209	0	0.036458	0.044432	0.096115	0.100954	0.168743	0.185867	0.18848	0.214611	0.23837	0.26481
191.39	0.000209	0	0.036737	0.044244	0.096006	0.100581	0.16875	0.185232	0.18745	0.213835	0.238153	0.263932
191.59	0.000209	0	0.036425	0.044056	0.095371	0.10021	0.168109	0.1846	0.18695	0.213061	0.237193	0.263056
191.79	0.000208	0	0.036446	0.043869	0.095287	0.09984	0.168092	0.18397	0.18626	0.212291	0.236943	0.262184
191.99	0.000208	0	0.03639	0.043682	0.095198	0.099472	0.167784	0.183342	0.18544	0.211523	0.236576	0.261315
192.19	0.000208	0	0.036251	0.043497	0.094787	0.099105	0.167366	0.182717	0.18494	0.210757	0.23629	0.260448
192.39	0.000208	0	0.03623	0.043312	0.094452	0.098739	0.167707	0.182093	0.18449	0.209995	0.235977	0.259585
192.59	0.000208	0	0.036141	0.043128	0.094021	0.098375	0.166824	0.181471	0.18396	0.209235	0.235537	0.258724
192.79	0.000209	0	0.036196	0.042945	0.093849	0.098012	0.166788	0.180852	0.18323	0.208478	0.235631	0.257866
192.99	0.000209	0	0.035489	0.042762	0.093822	0.09765	0.166791	0.180235	0.18297	0.207724	0.234688	0.257011
193.19	0.00021	0	0.035027	0.04258	0.093078	0.09729	0.166159	0.17962	0.18182	0.206973	0.234467	0.256159
193.39	0.00021	0	0.035045	0.0424	0.092638	0.096931	0.165717	0.179007	0.18172	0.206224	0.234121	0.255309
193.59	0.00021	0	0.035138	0.042219	0.091857	0.096573	0.164667	0.178396	0.1814	0.205478	0.233485	0.254463
193.79	0.00021	0	0.035398	0.04204	0.091366	0.096217	0.165192	0.177787	0.18073	0.204734	0.232307	0.253619
193.99	0.00021	0	0.035172	0.041861	0.091291	0.095862	0.163435	0.17718	0.18008	0.203994	0.231444	0.252778
194.19	0.00021	0	0.034926	0.041684	0.090804	0.095508	0.162837	0.176575	0.17966	0.203256	0.231167	0.25194
194.39	0.00021	0	0.034896	0.041507	0.090611	0.095156	0.162357	0.175973	0.17857	0.20252	0.230425	0.251105
194.59	0.00021	0	0.033712	0.04133	0.090173	0.094804	0.161465	0.175372	0.17819	0.201788	0.229986	0.250272
194.79	0.00021	0	0.033167	0.041155	0.089536	0.094455	0.160282	0.174773	0.17749	0.201058	0.229239	0.249442
194.99	0.00021	0	0.03327	0.04098	0.08938	0.094106	0.158949	0.174177	0.17736	0.20033	0.22793	0.248615
195.19	0.000211	0	0.033688	0.040806	0.089521	0.093759	0.157582	0.173582	0.17696	0.199606	0.227545	0.247791
195.39	0.000211	0	0.033684	0.040632	0.089028	0.093413	0.156643	0.17299	0.17634	0.198883	0.226689	0.246969
195.59	0.000211	0	0.033475	0.04046	0.088587	0.093068	0.155525	0.172399	0.17559	0.198164	0.225847	0.24615
195.79	0.000211	0	0.033512	0.040288	0.089104	0.092725	0.154817	0.171811	0.17518	0.197447	0.225244	0.245334
195.99	0.000211	0	0.032901	0.040117	0.089084	0.092383	0.154213	0.171225	0.17415	0.196733	0.224478	0.24452
196.19	0.000211	0	0.03249	0.039946	0.089263	0.092042	0.153394	0.17064	0.1734	0.196021	0.223677	0.24371
196.39	0.000211	0	0.031737	0.039777	0.089035	0.091702	0.153275	0.170058	0.17278	0.195312	0.223543	0.242901
196.59	0.00021	0	0.031875	0.039608	0.088287	0.091364	0.152826	0.169477	0.17234	0.194605	0.223143	0.242096
196.79	0.00021	0	0.032055	0.039439	0.088551	0.091026	0.152247	0.168899	0.17156	0.193901	0.222312	0.241293
196.99	0.00021	0	0.031242	0.039272	0.087985	0.090691	0.15226	0.168323	0.1714	0.1932	0.221496	0.240493
197.19	0.00021	0	0.03131	0.039105	0.087625	0.090356	0.151991	0.167748	0.1699	0.192501	0.220576	0.239696
197.39	0.00021	0	0.032007	0.038939	0.087876	0.090022	0.15152	0.167175	0.17004	0.191804	0.220309	0.238901
197.59	0.00021	0	0.031408	0.038773	0.087691	0.08969	0.15196	0.166605	0.16949	0.19111	0.219661	0.238109
197.79	0.00021	0	0.031208	0.038609	0.087217	0.089359	0.152322	0.166036	0.16899	0.190419	0.218408	0.237319
197.99	0.00021	0	0.030808	0.038445	0.087103	0.08903	0.151153	0.16547	0.16886	0.18973	0.218526	0.236532
198.19	0.00021	0	0.030829	0.038281	0.085865	0.088701	0.150942	0.164905	0.16821	0.189044	0.218826	0.235748
198.39	0.00021	0	0.031012	0.038119	0.085752	0.088374	0.150866	0.164342	0.16742	0.18836	0.217813	0.234966
198.59	0.000211	0	0.030644	0.037957	0.084517	0.088048	0.150055	0.163781	0.16743	0.187678	0.217878	0.234187
198.79	0.000211	0	0.031312	0.037795	0.083434	0.087723	0.149644	0.163222	0.16659	0.186999	0.21699	0.233411
198.99	0.000212	0	0.031519	0.037635	0.083048	0.087399	0.149277	0.162665	0.16615	0.186323	0.216291	0.232637
199.19	0.000212	0	0.03195	0.037475	0.083069	0.087077	0.149036	0.16211	0.16566	0.185649	0.215844	0.231865
199.39	0.000213	0	0.031241	0.037316	0.081662	0.086755	0.149265	0.161556	0.16529	0.184977	0.215636	0.231097
199.59	0.000212	0	0.031045	0.037157	0.081466	0.086435	0.148879	0.161005	0.16427	0.184308	0.215786	0.23033
199.79	0.000213	0	0.030921	0.036999	0.081661	0.086116	0.148378	0.160456	0.16429	0.183641	0.215434	0.229566
199.99	0.000213	0	0.029942	0.036842	0.081898	0.085798	0.147924	0.159908	0.16391	0.182977	0.215585	0.228805
200.19	0.000213	0	0.029723	0.036686	0.082088	0.085482	0.14714	0.159362	0.16373	0.182315	0.215431	0.228047
200.39	0.000213	0	0.029372	0.03653	0.081517	0.085166	0.146645	0.158818	0.16282	0.181655	0.215452	0.22729
200.59	0.000213	0	0.029425	0.036375	0.081175	0.084852	0.145837	0.158276	0.16213	0.180998	0.214547	0.226537
200.79	0.000213	0	0.028687	0.03622	0.081876	0.084539	0.145203	0.157736	0.16123	0.180343	0.213848	0.225786
200.99	0.000213	0	0.027727	0.036066	0.081714	0.084227	0.144614	0.157198	0.1613	0.179691	0.213412	0.225037
201.19	0.000212	0	0.027756	0.035913	0.082121	0.083916	0.144741	0.156661	0.16074	0.179041	0.212574	0.224291
201.39	0.000211	0	0.028113	0.03576	0.081971	0.083606	0.144374	0.156126	0.1609	0.178393	0.211605	0.223547
201.59	0.000211	0	0.027519	0.035609	0.081206	0.083298	0.144697	0.155594	0.16059	0.177748	0.210695	0.222806
201.79	0.00021	0	0.027533	0.035457	0.080354	0.082991	0.143777	0.155062	0.16035	0.177105	0.209975	0.222067
201.99	0.00021	0	0.027777	0.035307	0.080222	0.082684	0.142698	0.154533	0.15976	0.176464	0.21017	0.221331
202.19	0.00021	0	0.027772	0.035157	0.07991	0.082379	0.142375	0.154006	0.15934	0.175826	0.209747	0.220597
202.39	0.00021	0	0.027649	0.035007	0.080101	0.082075	0.142164	0.15348	0.15825	0.175189	0.208648	0.219865
202.59	0.00021	0	0.027381	0.034859	0.079061	0.081772	0.141877	0.152956	0.15796	0.174556	0.208703	0.219136
202.79	0.00021	0	0.027818	0.03471	0.079124	0.081471	0.142298	0.152434	0.15675	0.173924	0.207777	0.21841
202.99	0.00021	0	0.027824	0.034563	0.078492	0.08117	0.142895	0.151914	0.15605	0.173295	0.208076	0.217685
203.19	0.00021	0	0.027728	0.034416	0.078166	0.08087	0.142827	0.151395	0.15544	0.172668	0.208073	0.216964
203.39	0.00021	0	0.027632	0.03427	0.077124	0.080572	0.142444	0.150879	0.15553	0.172043	0.208216	0.216244
203.59	0.00021	0	0.028412	0.034124	0.077125	0.080275	0.141743	0.150364	0.15534	0.171421	0.2075	0.215527
203.79	0.00021	0	0.028692	0.033979	0.076687	0.079978	0.140901	0.149851	0.15469	0.170801	0.206841	0.214812
203.99	0.00021	0	0.028514	0.033835	0.077237	0.079683	0.140605	0.149339	0.15402	0.170183	0.206473	0.2141
204.19	0.00021	0	0.028514	0.033691	0.077199	0.079389	0.140172	0.148829	0.15291	0.169567	0.205702	0.21339
204.39	0.000211	0	0.02789	0.033548	0.076875	0.079096	0.138803	0.148321	0.15181	0.168954	0.204718	0.212683
204.59	0.00021	0	0.027611	0.033406	0.076751	0.078804	0.137941	0.147815	0.15108	0.168343	0.203833	0.211977
204.79	0.00021	0	0.02723	0.033264	0.076404	0.078514	0.137793	0.147311	0.15079	0.167734	0.203276	0.211275
204.99	0.00021	0	0.026255	0.033122	0.076062	0.078224	0.137182	0.146808	0.15042	0.167127	0.202552	0.210574
205.19	0.00021	0	0.026044	0.032982	0.075756	0.077935	0.1368	0.146307	0.14998	0.166522	0.201724	0.209876
205.39	0.000211	0	0.025653	0.032842	0.075322	0.077648	0.135768	0.145808	0.14953	0.16592	0.200877	0.20918
205.59	0.000211	0	0.025088	0.032702	0.075201	0.077361	0.135054	0.14531	0.14942	0.165319	0.200726	0.208486
205.79	0.000211	0	0.023974	0.032563	0.075562	0.077076	0.134192	0.144814	0.14861	0.164721	0.200319	0.207795
205.99	0.000212	0	0.023025	0.032425	0.075211	0.076791	0.134152	0.14432	0.1483	0.164125	0.200142	0.207106
206.19	0.000213	0	0.021503	0.032287	0.075325	0.076508	0.133845	0.143827	0.14769	0.163532	0.199908	0.206419
206.39	0.000213	0	0.020472	0.03215	0.074504	0.076226	0.133596	0.143336	0.14673	0.16294	0.199506	0.205735
206.59	0.000214	0	0.020188	0.032013	0.074832	0.075944	0.133977	0.142847	0.14669	0.162351	0.199602	0.205053
206.79	0.000213	0	0.019998	0.031877	0.074628	0.075664	0.134525	0.142359	0.14649	0.161763	0.199646	0.204373
206.99	0.000213	0	0.019798	0.031742	0.073666	0.075385	0.134638	0.141874	0.14696	0.161178	0.199703	0.203695
207.19	0.000213	0	0.019586	0.031607	0.073455	0.075107	0.135084	0.141389	0.14736	0.160595	0.199689	0.20302
207.39	0.000212	0	0.020276	0.031473	0.072991	0.07483	0.135004	0.140907	0.14732	0.160014	0.198775	0.202346
207.59	0.000211	0	0.020805	0.031339	0.07254	0.074553	0.13524	0.140426	0.14664	0.159435	0.197633	0.201675
207.79	0.000211	0	0.020959	0.031206	0.072736	0.074278	0.134906	0.139947	0.14555	0.158858	0.19741	0.201007
207.99	0.000211	0	0.020757	0.031073	0.072897	0.074004	0.134374	0.139469	0.14558	0.158283	0.196611	0.20034
208.19	0.000211	0	0.02143	0.030941	0.07218	0.073731	0.133529	0.138993	0.14496	0.157711	0.195944	0.199676
208.39	0.000211	0	0.021934	0.03081	0.071545	0.073459	0.132378	0.138518	0.14434	0.15714	0.195251	0.199014
208.59	0.00021	0	0.022608	0.030679	0.071016	0.073188	0.132435	0.138046	0.14374	0.156572	0.195	0.198354
208.79	0.000211	0	0.022673	0.030549	0.070464	0.072918	0.132214	0.137575	0.14273	0.156005	0.194649	0.197696
208.99	0.000212	0	0.022258	0.030419	0.070626	0.072649	0.131306	0.137105	0.1418	0.155441	0.193792	0.197041
209.19	0.000212	0	0.022827	0.03029	0.070126	0.072381	0.130308	0.136637	0.14132	0.154879	0.193393	0.196387
209.39	0.000213	0	0.022826	0.030161	0.070394	0.072114	0.129869	0.136171	0.14118	0.154318	0.192581	0.195736
209.59	0.000213	0	0.023016	0.030033	0.069266	0.071848	0.129123	0.135706	0.1402	0.15376	0.192013	0.195087
209.79	0.000213	0	0.021624	0.029905	0.068889	0.071582	0.128869	0.135243	0.13942	0.153204	0.19177	0.19444
209.99	0.000214	0	0.020661	0.029778	0.067658	0.071318	0.127872	0.134781	0.13929	0.15265	0.191085	0.193795
210.19	0.000214	0	0.019723	0.029652	0.067523	0.071055	0.126656	0.134321	0.13828	0.152097	0.190241	0.193153
210.39	0.000214	0	0.019175	0.029526	0.067051	0.070793	0.126067	0.133863	0.13809	0.151547	0.190387	0.192512
210.59	0.000214	0	0.019064	0.0294	0.067932	0.070532	0.125979	0.133406	0.13796	0.150999	0.189916	0.191874
210.79	0.000213	0	0.018824	0.029275	0.06751	0.070271	0.125594	0.13295	0.13847	0.150453	0.189474	0.191238
210.99	0.000213	0	0.018855	0.029151	0.067541	0.070012	0.125417	0.132497	0.13823	0.149908	0.189416	0.190604
211.19	0.000213	0	0.018938	0.029027	0.067658	0.069754	0.125113	0.132044	0.13816	0.149366	0.189613	0.189972
211.39	0.000212	0	0.018908	0.028904	0.067396	0.069496	0.124242	0.131594	0.13745	0.148826	0.188683	0.189342
211.59	0.000211	0	0.018967	0.028781	0.067376	0.06924	0.124198	0.131145	0.13736	0.148287	0.188397	0.188714
211.79	0.000212	0	0.019075	0.028659	0.067447	0.068984	0.123549	0.130697	0.13754	0.147751	0.188407	0.188088
211.99	0.000211	0	0.019057	0.028537	0.06791	0.06873	0.123589	0.130251	0.13786	0.147216	0.188203	0.187465
212.19	0.000211	0	0.01959	0.028416	0.067801	0.068476	0.12324	0.129806	0.13733	0.146684	0.188505	0.186843
212.39	0.000211	0	0.019803	0.028295	0.067743	0.068224	0.123475	0.129363	0.13741	0.146153	0.188579	0.186223
212.59	0.000212	0	0.020827	0.028175	0.067726	0.067972	0.123879	0.128922	0.13699	0.145624	0.188672	0.185606
212.79	0.000212	0	0.021958	0.028055	0.06762	0.067721	0.123941	0.128482	0.13583	0.145097	0.188841	0.18499
212.99	0.000212	0	0.022859	0.027936	0.067261	0.067471	0.123668	0.128043	0.13554	0.144572	0.188285	0.184377
213.19	0.000212	0	0.023317	0.027817	0.067288	0.067222	0.123321	0.127606	0.13525	0.144049	0.187932	0.183766
213.39	0.000212	0	0.023316	0.027699	0.067338	0.066974	0.123273	0.127171	0.13485	0.143528	0.187343	0.183156
213.59	0.000212	0	0.02345	0.027581	0.0657	0.066727	0.122767	0.126737	0.13372	0.143009	0.187137	0.182549
213.79	0.000212	0	0.022993	0.027464	0.065794	0.066481	0.122529	0.126304	0.13285	0.142492	0.186552	0.181944
213.99	0.000213	0	0.023403	0.027348	0.065046	0.066235	0.121733	0.125873	0.13234	0.141976	0.185889	0.18134
214.19	0.000213	0	0.023877	0.027231	0.064764	0.065991	0.121259	0.125443	0.13169	0.141462	0.185501	0.180739
214.39	0.000213	0	0.023721	0.027116	0.064278	0.065747	0.121069	0.125015	0.13141	0.140951	0.185754	0.18014
214.59	0.000213	0	0.024	0.027	0.064301	0.065505	0.12082	0.124589	0.13036	0.140441	0.184555	0.179543
214.79	0.000213	0	0.024017	0.026886	0.064112	0.065263	0.120739	0.124163	0.13018	0.139933	0.184247	0.178947
214.99	0.000213	0	0.023613	0.026772	0.064261	0.065022	0.119964	0.12374	0.12962	0.139426	0.18375	0.178354
215.19	0.000214	0	0.022502	0.026658	0.063405	0.064782	0.119112	0.123317	0.12926	0.138922	0.182595	0.177762
215.39	0.000214	0	0.021907	0.026545	0.063605	0.064543	0.118104	0.122896	0.12899	0.138419	0.182048	0.177173
215.59	0.000214	0	0.021433	0.026432	0.06358	0.064305	0.117947	0.122477	0.12869	0.137919	0.181518	0.176586
215.79	0.000215	0	0.020792	0.02632	0.063684	0.064068	0.117532	0.122059	0.12796	0.13742	0.181361	0.176
215.99	0.000215	0	0.020133	0.026208	0.06462	0.063831	0.117525	0.121642	0.12749	0.136923	0.181135	0.175416
216.19	0.000215	0	0.019793	0.026096	0.064295	0.063596	0.116652	0.121227	0.12727	0.136427	0.180671	0.174835
216.39	0.000216	0	0.019749	0.025985	0.064546	0.063361	0.117064	0.120813	0.12693	0.135934	0.180597	0.174255
216.59	0.000216	0	0.01976	0.025875	0.064763	0.063127	0.116119	0.120401	0.12651	0.135442	0.179414	0.173677
216.79	0.000215	0	0.019334	0.025765	0.064784	0.062894	0.115833	0.11999	0.12574	0.134952	0.17905	0.173101
216.99	0.000214	0	0.018132	0.025656	0.064741	0.062662	0.115566	0.119581	0.12527	0.134464	0.178274	0.172527
217.19	0.000213	0	0.017182	0.025547	0.064892	0.062431	0.115468	0.119172	0.12448	0.133977	0.177737	0.171955
217.39	0.000213	0	0.016411	0.025438	0.064524	0.062201	0.115176	0.118766	0.12427	0.133493	0.177294	0.171385
217.59	0.000213	0	0.016194	0.02533	0.063993	0.061971	0.114185	0.11836	0.12419	0.13301	0.176174	0.170817
217.79	0.000213	0	0.015839	0.025223	0.064184	0.061742	0.113541	0.117956	0.12401	0.132528	0.176047	0.17025
217.99	0.000213	0	0.015579	0.025115	0.063619	0.061515	0.112955	0.117554	0.1248	0.132049	0.176122	0.169686
218.19	0.000212	0	0.015326	0.025009	0.063433	0.061288	0.111969	0.117153	0.12473	0.131571	0.176292	0.169123
218.39	0.000212	0	0.014427	0.024902	0.063477	0.061061	0.112056	0.116753	0.12459	0.131095	0.176272	0.168562
218.59	0.000211	0	0.01459	0.024797	0.062949	0.060836	0.112014	0.116354	0.12484	0.130621	0.176281	0.168003
218.79	0.000211	0	0.014057	0.024691	0.062395	0.060612	0.111493	0.115957	0.12565	0.130148	0.176057	0.167446
218.99	0.000211	0	0.01366	0.024586	0.061619	0.060388	0.110481	0.115561	0.1254	0.129678	0.176045	0.166891
219.19	0.000211	0	0.014078	0.024482	0.060738	0.060165	0.110238	0.115167	0.12531	0.129208	0.176367	0.166338
219.39	0.000211	0	0.015065	0.024378	0.061038	0.059943	0.10938	0.114774	0.12523	0.128741	0.176733	0.165786
219.59	0.000211	0	0.014867	0.024274	0.060676	0.059722	0.109718	0.114382	0.1248	0.128275	0.176795	0.165237
219.79	0.000211	0	0.015625	0.024171	0.060397	0.059502	0.109615	0.113992	0.12451	0.127811	0.176575	0.164689
219.99	0.000211	0	0.015948	0.024069	0.060324	0.059282	0.110262	0.113603	0.12425	0.127349	0.175914	0.164143
220.19	0.000211	0	0.016106	0.023966	0.060527	0.059063	0.11002	0.113215	0.12408	0.126888	0.175212	0.163598
220.39	0.000212	0	0.016369	0.023864	0.060207	0.058845	0.11028	0.112828	0.12354	0.126429	0.174496	0.163056
220.59	0.000212	0	0.016559	0.023763	0.060156	0.058628	0.109672	0.112443	0.12307	0.125972	0.172995	0.162515
220.79	0.000212	0	0.016894	0.023662	0.060181	0.058412	0.110835	0.11206	0.12255	0.125516	0.172947	0.161976
220.99	0.000212	0	0.016798	0.023562	0.060107	0.058196	0.111274	0.111677	0.12179	0.125062	0.172146	0.161439
221.19	0.000212	0	0.017115	0.023462	0.059944	0.057982	0.11155	0.111296	0.12145	0.124609	0.170973	0.160904
221.39	0.000213	0	0.016808	0.023362	0.06061	0.057768	0.111237	0.110916	0.12126	0.124159	0.170157	0.16037
221.59	0.000213	0	0.016307	0.023263	0.060559	0.057554	0.110527	0.110538	0.12073	0.123709	0.16878	0.159839
221.79	0.000215	0	0.016006	0.023164	0.060402	0.057342	0.110043	0.11016	0.12051	0.123262	0.168412	0.159309
221.99	0.000215	0	0.015493	0.023065	0.060226	0.05713	0.110104	0.109784	0.1201	0.122816	0.168143	0.15878
222.19	0.000215	0	0.015179	0.022967	0.059961	0.05692	0.109573	0.10941	0.11909	0.122372	0.168133	0.158254
222.39	0.000216	0	0.014632	0.02287	0.059812	0.05671	0.109735	0.109036	0.11881	0.121929	0.16826	0.157729
222.59	0.000216	0	0.014393	0.022773	0.059592	0.0565	0.108813	0.108664	0.11878	0.121488	0.168512	0.157206
222.79	0.000216	0	0.014017	0.022676	0.059619	0.056292	0.108208	0.108293	0.11825	0.121048	0.168464	0.156685
222.99	0.000216	0	0.01364	0.02258	0.059094	0.056084	0.107517	0.107924	0.11798	0.12061	0.168746	0.156165
223.19	0.000216	0	0.013909	0.022484	0.058652	0.055877	0.106927	0.107555	0.11767	0.120174	0.168675	0.155647
223.39	0.000216	0	0.013546	0.022388	0.058802	0.055671	0.106196	0.107188	0.11733	0.119739	0.168313	0.155131
223.59	0.000216	0	0.01259	0.022293	0.05861	0.055465	0.105532	0.106822	0.11656	0.119306	0.168514	0.154617
223.79	0.000215	0	0.012493	0.022198	0.058062	0.055261	0.104653	0.106458	0.11591	0.118874	0.168277	0.154104
223.99	0.000215	0	0.012127	0.022104	0.057771	0.055057	0.104536	0.106094	0.11581	0.118444	0.167884	0.153593
224.19	0.000215	0	0.011476	0.02201	0.057542	0.054854	0.103821	0.105732	0.11601	0.118016	0.167942	0.153084
224.39	0.000215	0	0.011749	0.021917	0.057171	0.054651	0.10327	0.105371	0.11565	0.117589	0.167481	0.152576
224.59	0.000214	0	0.011917	0.021823	0.05723	0.05445	0.103028	0.105012	0.11536	0.117164	0.167162	0.15207
224.79	0.000214	0	0.012223	0.021731	0.057588	0.054249	0.102806	0.104653	0.11523	0.11674	0.167235	0.151566
224.99	0.000214	0	0.012116	0.021638	0.056797	0.054049	0.102528	0.104296	0.11527	0.116317	0.166584	0.151064
225.19	0.000213	0	0.012148	0.021547	0.056526	0.053849	0.102307	0.10394	0.11485	0.115897	0.16629	0.150563
225.39	0.000214	0	0.011657	0.021455	0.056109	0.05365	0.10211	0.103585	0.11426	0.115477	0.165734	0.150064
225.59	0.000213	0	0.01189	0.021364	0.054874	0.053452	0.101628	0.103232	0.11437	0.115059	0.165011	0.149566
225.79	0.000213	0	0.012266	0.021273	0.054399	0.053255	0.101807	0.102879	0.11425	0.114643	0.164852	0.14907
225.99	0.000213	0	0.01191	0.021183	0.053969	0.053059	0.102053	0.102528	0.11399	0.114228	0.164811	0.148576
226.19	0.000213	0	0.01153	0.021093	0.053287	0.052863	0.101093	0.102178	0.11371	0.113815	0.164999	0.148083
226.39	0.000213	0	0.011501	0.021003	0.053469	0.052668	0.100332	0.10183	0.11413	0.113403	0.165117	0.147592
226.59	0.000213	0	0.011633	0.020914	0.053241	0.052473	0.099502	0.101482	0.11391	0.112993	0.165031	0.147103
226.79	0.000213	0	0.011563	0.020825	0.052268	0.05228	0.099389	0.101136	0.114	0.112584	0.164203	0.146615
226.99	0.000214	0	0.011481	0.020737	0.051298	0.052087	0.09917	0.100791	0.11384	0.112177	0.163336	0.146129
227.19	0.000214	0	0.011653	0.020648	0.050979	0.051895	0.098857	0.100447	0.11312	0.111771	0.16331	0.145644
227.39	0.000214	0	0.011373	0.020561	0.051026	0.051703	0.099	0.100104	0.11278	0.111367	0.162936	0.145161
227.59	0.000215	0	0.010344	0.020473	0.050673	0.051512	0.098765	0.099762	0.11176	0.110964	0.162532	0.14468
227.79	0.000216	0	0.010355	0.020386	0.050652	0.051322	0.099256	0.099422	0.11141	0.110563	0.162213	0.1442
227.99	0.000216	0	0.01024	0.0203	0.050677	0.051133	0.099712	0.099082	0.11104	0.110163	0.161412	0.143722
228.19	0.000217	0	0.00952	0.020214	0.050862	0.050944	0.10025	0.098744	0.11027	0.109764	0.161422	0.143245
228.39	0.000217	0	0.010045	0.020128	0.051365	0.050756	0.100163	0.098407	0.10929	0.109367	0.160999	0.14277
228.59	0.000217	0	0.009948	0.020042	0.051458	0.050569	0.101006	0.098071	0.10888	0.108971	0.16078	0.142297
228.79	0.000217	0	0.00983	0.019957	0.051314	0.050382	0.101265	0.097736	0.1088	0.108577	0.160775	0.141825
228.99	0.000217	0	0.010105	0.019872	0.05074	0.050196	0.102309	0.097403	0.10882	0.108184	0.160936	0.141355
229.19	0.000217	0	0.010429	0.019788	0.050507	0.050011	0.102557	0.09707	0.10824	0.107793	0.160738	0.140886
229.39	0.000217	0	0.010831	0.019704	0.050239	0.049827	0.10255	0.096739	0.10791	0.107403	0.160244	0.140419
229.59	0.000217	0	0.011362	0.01962	0.050249	0.049643	0.102269	0.096409	0.10789	0.107014	0.160307	0.139953
229.79	0.000216	0	0.011063	0.019537	0.050246	0.04946	0.102043	0.09608	0.1075	0.106627	0.159849	0.139489
229.99	0.000216	0	0.011098	0.019454	0.050091	0.049277	0.101482	0.095752	0.1074	0.106241	0.15982	0.139027
230.19	0.000216	0	0.010523	0.019371	0.049823	0.049095	0.100071	0.095425	0.10697	0.105857	0.160101	0.138566
230.39	0.000217	0	0.011611	0.019289	0.049986	0.048914	0.098995	0.095099	0.10708	0.105474	0.159548	0.138106
230.59	0.000217	0	0.011683	0.019207	0.049907	0.048734	0.098033	0.094775	0.10682	0.105093	0.158785	0.137648
230.79	0.000217	0	0.011475	0.019125	0.049833	0.048554	0.09745	0.094451	0.10703	0.104712	0.157821	0.137192
230.99	0.000217	0	0.011572	0.019044	0.049787	0.048375	0.096229	0.094129	0.10662	0.104334	0.15749	0.136737
231.19	0.000217	0	0.011205	0.018963	0.04977	0.048196	0.095431	0.093808	0.10643	0.103956	0.157214	0.136284
231.39	0.000217	0	0.010433	0.018882	0.050078	0.048018	0.094807	0.093488	0.10555	0.10358	0.155907	0.135832
231.59	0.000218	0	0.009443	0.018802	0.050194	0.047841	0.093977	0.093168	0.10488	0.103205	0.15521	0.135381
231.79	0.000218	0	0.009644	0.018722	0.05035	0.047664	0.093707	0.09285	0.10428	0.102832	0.154387	0.134933
231.99	0.000217	0	0.009048	0.018643	0.049952	0.047489	0.093107	0.092534	0.10453	0.10246	0.153602	0.134485
232.19	0.000217	0	0.009003	0.018564	0.049886	0.047313	0.093253	0.092218	0.1046	0.102089	0.153862	0.134039
232.39	0.000216	0	0.008451	0.018485	0.049252	0.047139	0.093087	0.091903	0.10417	0.10172	0.153908	0.133595
232.59	0.000216	0	0.008211	0.018406	0.048369	0.046965	0.093641	0.091589	0.10472	0.101352	0.153894	0.133152
232.79	0.000216	0	0.00801	0.018328	0.04773	0.046792	0.094136	0.091277	0.10457	0.100985	0.154299	0.13271
232.99	0.000216	0	0.008104	0.01825	0.047531	0.046619	0.094087	0.090965	0.10448	0.10062	0.154765	0.13227
233.19	0.000215	0	0.007334	0.018173	0.04656	0.046447	0.093852	0.090655	0.10382	0.100256	0.154771	0.131832
233.39	0.000214	0	0.007495	0.018095	0.046546	0.046275	0.093345	0.090345	0.10347	0.099893	0.154833	0.131394
233.59	0.000214	0	0.006969	0.018019	0.04601	0.046105	0.093474	0.090037	0.10316	0.099532	0.155155	0.130959
233.79	0.000214	0	0.00748	0.017942	0.045447	0.045935	0.092967	0.08973	0.10245	0.099172	0.15491	0.130525
233.99	0.000214	0	0.007474	0.017866	0.045175	0.045765	0.092893	0.089423	0.102	0.098813	0.155014	0.130092
234.19	0.000215	0	0.007204	0.01779	0.044995	0.045596	0.092386	0.089118	0.10148	0.098455	0.15503	0.12966
234.39	0.000216	0	0.008227	0.017714	0.045313	0.045428	0.092919	0.088814	0.10142	0.098099	0.1549	0.12923
234.59	0.000216	0	0.008058	0.017639	0.045777	0.04526	0.092609	0.088511	0.10098	0.097744	0.154297	0.128802
234.79	0.000216	0	0.008367	0.017564	0.045767	0.045093	0.091976	0.088209	0.10032	0.097391	0.15435	0.128375
234.99	0.000217	0	0.007874	0.01749	0.045603	0.044927	0.091565	0.087908	0.10012	0.097038	0.153952	0.127949
235.19	0.000217	0	0.00738	0.017415	0.046495	0.044761	0.091458	0.087608	0.0995	0.096687	0.152822	0.127525
235.39	0.000217	0	0.00754	0.017341	0.046963	0.044596	0.091098	0.087309	0.09905	0.096338	0.152019	0.127102
235.59	0.000217	0	0.007457	0.017268	0.04737	0.044431	0.091404	0.087011	0.09848	0.095989	0.151788	0.126681
235.79	0.000217	0	0.007857	0.017194	0.047538	0.044267	0.090829	0.086714	0.09847	0.095642	0.151277	0.126261
235.99	0.000216	0	0.007583	0.017121	0.047978	0.044104	0.090593	0.086418	0.09892	0.095296	0.151354	0.125842
236.19	0.000216	0	0.007368	0.017048	0.047692	0.043941	0.090675	0.086123	0.09864	0.094951	0.151569	0.125425
236.39	0.000215	0	0.006806	0.016976	0.047893	0.043779	0.090491	0.085829	0.0988	0.094608	0.151387	0.125009
236.59	0.000215	0	0.007045	0.016904	0.047276	0.043618	0.090489	0.085536	0.09907	0.094265	0.150977	0.124594
236.79	0.000216	0	0.006723	0.016832	0.047265	0.043457	0.090391	0.085244	0.09868	0.093924	0.151509	0.124181
236.99	0.000215	0	0.00667	0.016761	0.047306	0.043296	0.089633	0.084953	0.09871	0.093584	0.151602	0.123769
237.19	0.000215	0	0.006668	0.016689	0.04674	0.043136	0.089671	0.084663	0.09789	0.093246	0.151673	0.123359
237.39	0.000215	0	0.007711	0.016618	0.046554	0.042977	0.089049	0.084374	0.09792	0.092909	0.151549	0.12295
237.59	0.000215	0	0.007594	0.016548	0.045841	0.042819	0.088152	0.084086	0.09726	0.092572	0.151813	0.122542
237.79	0.000214	0	0.008343	0.016478	0.045391	0.042661	0.087427	0.083799	0.09713	0.092238	0.151741	0.122136
237.99	0.000215	0	0.007992	0.016408	0.044825	0.042503	0.087406	0.083513	0.09668	0.091904	0.151955	0.121731
238.19	0.000216	0	0.008305	0.016338	0.044412	0.042346	0.087316	0.083228	0.09624	0.091571	0.152227	0.121327
238.39	0.000216	0	0.008747	0.016268	0.043901	0.04219	0.087259	0.082944	0.09583	0.09124	0.152111	0.120925
238.59	0.000216	0	0.008548	0.016199	0.043244	0.042035	0.086412	0.082661	0.09525	0.09091	0.151683	0.120524
238.79	0.000217	0	0.00835	0.01613	0.04237	0.041879	0.085902	0.082379	0.09502	0.090581	0.151885	0.120124
238.99	0.000217	0	0.00779	0.016062	0.041762	0.041725	0.086056	0.082098	0.0951	0.090253	0.1515	0.119726
239.19	0.000216	0	0.007778	0.015994	0.041548	0.041571	0.085776	0.081817	0.09465	0.089927	0.151088	0.119329
239.39	0.000216	0	0.007944	0.015926	0.040848	0.041417	0.085971	0.081538	0.09469	0.089602	0.151174	0.118933
239.59	0.000214	0	0.007263	0.015858	0.040538	0.041265	0.085931	0.08126	0.09445	0.089277	0.151297	0.118539
239.79	0.000214	0	0.006806	0.015791	0.039961	0.041112	0.08532	0.080983	0.09517	0.088954	0.151274	0.118146
	0.000214	0	0.006223	0.015724	0.039476	0.040961	0.085612	0.080706	0.09565	0.088633	0.151174	0.117754

## Sheet: Saquinavir
	0 uM		1.75 uM		3.125 uM		6.25 uM		12.5 uM		25 uM
Time	RU	Fit	RU	Fit	RU	Fit	RU	Fit	RU	Fit	RU	Fit						Steady state kinetics
0	0.00118	0	0	0	0	0	0	0	0	0	0.01257	0.00659					Drug concentration	Replica1	Replica2	Replica3
0.2	0.00112	0	0.000652636	0.0012	0.00434	0.00418	0.0075	0.00381	0.0127	0.00572	0.01964	0.00985					0	0	0	0
0.4	0.00104	0	0.00176	0.00237	0.00932	0.00834	0.01608	0.0076	0.02725	0.0114	0.02722	0.0131					1.75	0.0586	0.0286	0.0486
0.6	0.000979216	0	0.00294	0.00351	0.01503	0.01249	0.02574	0.01136	0.04255	0.01703	0.03502	0.01632					3.13	0.4155	0.45155	0.5155
0.8	0.00089779	0	0.00432	0.00464	0.02105	0.01662	0.03603	0.0151	0.05922	0.02262	0.04272	0.01952					6.25	0.5889	0.6489	0.5389
1	0.00078419	0	0.00592	0.00574	0.02738	0.02073	0.04611	0.01881	0.07578	0.02816	0.04973	0.0227					12.5	0.6259	0.8259	0.7259
1.2	0.000671347	0	0.00762	0.00681	0.03407	0.02482	0.05615	0.0225	0.09267	0.03367	0.05613	0.02586					25	1.0539	0.90539	0.9539
1.4	0.000574601	0	0.00902	0.00787	0.04115	0.0289	0.0662	0.02617	0.10861	0.03913	0.06237	0.029
1.6	0.00050628	0	0.01033	0.00891	0.04769	0.03297	0.07568	0.02981	0.12425	0.04455	0.06714	0.03211
1.8	0.000436089	0	0.01188	0.00992	0.05382	0.03702	0.08346	0.03343	0.13768	0.04993	0.07076	0.03521
2	0.000370878	0	0.01358	0.01091	0.05918	0.04105	0.0906	0.03702	0.14833	0.05527	0.07442	0.03829
2.2	0.000313099	0	0.01521	0.01188	0.06373	0.04506	0.0954	0.04059	0.15638	0.06056	0.07685	0.04135
2.4	0.00022911	0	0.0167	0.01284	0.06862	0.04906	0.0998	0.04414	0.16298	0.06582	0.07953	0.04439
2.6	0.000185825	0	0.01786	0.01377	0.0721	0.05305	0.10432	0.04767	0.16941	0.07104	0.08228	0.04741
2.8	0.000147415	0	0.01906	0.01468	0.07559	0.05701	0.10792	0.05117	0.17412	0.07621	0.08494	0.05041
3	8.94774e-05	0	0.01968	0.01558	0.07962	0.06097	0.11153	0.05465	0.17894	0.08135	0.08728	0.05339
3.2	8.15064e-05	0	0.02085	0.01645	0.08288	0.0649	0.11443	0.05811	0.18283	0.08645	0.08955	0.05635
3.4	5.23828e-05	0	0.02144	0.01731	0.08661	0.06882	0.11693	0.06154	0.18657	0.09151	0.09116	0.05929
3.6	3.74347e-05	0	0.02225	0.01815	0.08988	0.07273	0.12018	0.06495	0.18979	0.09652	0.09296	0.06222
3.8	4.10131e-05	0	0.02283	0.01898	0.09324	0.07662	0.12287	0.06834	0.19312	0.10151	0.09438	0.06512
4	7.62691e-05	0	0.02316	0.01979	0.09627	0.08049	0.12471	0.07171	0.19623	0.10645	0.09563	0.06801
4.2	0.000102509	0	0.02351	0.02058	0.09961	0.08435	0.12652	0.07506	0.19883	0.11135	0.09649	0.07088
4.4	0.000138589	0	0.02406	0.02135	0.1028	0.08819	0.12864	0.07838	0.20183	0.11622	0.09778	0.07373
4.6	0.000161302	0	0.02404	0.02211	0.10603	0.09202	0.13068	0.08169	0.20415	0.12105	0.09906	0.07656
4.8	0.000219532	0	0.02445	0.02285	0.10993	0.09583	0.13217	0.08497	0.20714	0.12585	0.09997	0.07937
5	0.00029567	0	0.02463	0.02358	0.11342	0.09963	0.13333	0.08823	0.20947	0.1306	0.10056	0.08216
5.2	0.000309571	0	0.02425	0.0243	0.11703	0.10342	0.13542	0.09147	0.21254	0.13532	0.1025	0.08494
5.4	0.000353851	0	0.02409	0.02499	0.12026	0.10718	0.13743	0.09468	0.21525	0.14001	0.10417	0.0877
5.6	0.000456346	0	0.02409	0.02568	0.12343	0.11094	0.13883	0.09788	0.21822	0.14466	0.10534	0.09044
5.8	0.000510517	0	0.02431	0.02635	0.12647	0.11467	0.14011	0.10106	0.22014	0.14927	0.10666	0.09316
6	0.00057669	0	0.02469	0.02701	0.12959	0.1184	0.14211	0.10421	0.22211	0.15385	0.10851	0.09587
6.2	0.000628276	0	0.02459	0.02765	0.13298	0.1221	0.14326	0.10735	0.22471	0.15839	0.10977	0.09855
6.4	0.0006532	0	0.02495	0.02828	0.13594	0.1258	0.14504	0.11046	0.22691	0.1629	0.11172	0.10122
6.6	0.000672405	0	0.02523	0.0289	0.13857	0.12948	0.14748	0.11356	0.22836	0.16737	0.11359	0.10388
6.8	0.000710137	0	0.02541	0.0295	0.14125	0.13314	0.14891	0.11663	0.22976	0.17181	0.11543	0.10651
7	0.000765854	0	0.02541	0.03009	0.1444	0.13679	0.15046	0.11969	0.23163	0.17622	0.11713	0.10913
7.2	0.00078552	0	0.02587	0.03067	0.14675	0.14043	0.15218	0.12272	0.23342	0.18059	0.11915	0.11174
7.4	0.000911244	0	0.0262	0.03124	0.14926	0.14405	0.15424	0.12574	0.23561	0.18493	0.1204	0.11432
7.6	0.000993106	0	0.02645	0.0318	0.15153	0.14765	0.15625	0.12874	0.23773	0.18923	0.12242	0.11689
7.8	0.00113	0	0.02651	0.03234	0.15384	0.15124	0.15784	0.13171	0.2406	0.1935	0.12384	0.11944
8	0.00121	0	0.02656	0.03288	0.15663	0.15482	0.15914	0.13467	0.24261	0.19774	0.12441	0.12198
8.2	0.00129	0	0.02707	0.0334	0.15966	0.15839	0.16052	0.13761	0.24496	0.20195	0.1259	0.1245
8.4	0.00138	0	0.0272	0.03392	0.16255	0.16193	0.16179	0.14053	0.24783	0.20613	0.12751	0.127
8.6	0.00143	0	0.02697	0.03442	0.16604	0.16547	0.16313	0.14343	0.25011	0.21027	0.12908	0.12949
8.8	0.00144	0	0.0276	0.03491	0.16968	0.16899	0.16446	0.14631	0.25344	0.21438	0.13058	0.13196
9	0.00145	0	0.02782	0.03539	0.17206	0.1725	0.16611	0.14917	0.2561	0.21846	0.13134	0.13442
9.2	0.00145	0	0.02862	0.03586	0.1755	0.17599	0.1679	0.15201	0.25873	0.22251	0.13314	0.13685
9.4	0.00153	0	0.02914	0.03633	0.17849	0.17947	0.16972	0.15484	0.2614	0.22653	0.1338	0.13928
9.6	0.00158	0	0.02916	0.03678	0.18201	0.18294	0.17144	0.15765	0.26378	0.23051	0.13445	0.14169
9.8	0.00156	0	0.02979	0.03722	0.18491	0.18639	0.1733	0.16043	0.26567	0.23447	0.13534	0.14408
10	0.00154	0	0.03024	0.03766	0.18797	0.18983	0.17512	0.1632	0.26777	0.2384	0.13621	0.14646
10.2	0.00155	0	0.03053	0.03808	0.19082	0.19325	0.17697	0.16596	0.27024	0.24229	0.13686	0.14882
10.4	0.0016	0	0.03149	0.0385	0.19389	0.19666	0.1787	0.16869	0.27177	0.24616	0.13758	0.15117
10.6	0.00157	0	0.03198	0.03891	0.19722	0.20006	0.18028	0.17141	0.27344	0.24999	0.13921	0.1535
10.8	0.00161	0	0.03255	0.03931	0.19963	0.20344	0.18175	0.17411	0.27494	0.2538	0.14077	0.15581
11	0.00166	0	0.0327	0.0397	0.20248	0.20681	0.1834	0.17679	0.27672	0.25758	0.14248	0.15812
11.2	0.00169	0	0.03281	0.04008	0.20504	0.21017	0.18541	0.17946	0.27846	0.26133	0.14442	0.1604
11.4	0.00178	0	0.03334	0.04046	0.20756	0.21351	0.18732	0.1821	0.2803	0.26505	0.14636	0.16267
11.6	0.00185	0	0.03321	0.04083	0.21047	0.21684	0.18885	0.18473	0.28213	0.26874	0.14887	0.16493
11.8	0.00194	0	0.03307	0.04119	0.21343	0.22016	0.19125	0.18735	0.28449	0.27241	0.15055	0.16717
12	0.00202	0	0.03352	0.04154	0.21691	0.22346	0.19332	0.18994	0.28668	0.27604	0.15232	0.1694
12.2	0.00212	0	0.03322	0.04189	0.22002	0.22675	0.19507	0.19252	0.28888	0.27965	0.15506	0.17162
12.4	0.00219	0	0.03288	0.04223	0.22318	0.23003	0.1973	0.19508	0.29094	0.28323	0.15737	0.17382
12.6	0.00219	0	0.03266	0.04256	0.22587	0.2333	0.19901	0.19763	0.29321	0.28678	0.15909	0.176
12.8	0.00218	0	0.03277	0.04289	0.22866	0.23655	0.20118	0.20016	0.2953	0.29031	0.16096	0.17817
13	0.00221	0	0.03278	0.0432	0.23194	0.23979	0.20314	0.20267	0.29724	0.29381	0.1623	0.18033
13.2	0.00224	0	0.03291	0.04352	0.23562	0.24301	0.2051	0.20517	0.29921	0.29728	0.164	0.18247
13.4	0.00225	0	0.03236	0.04382	0.23836	0.24622	0.2072	0.20765	0.30165	0.30073	0.16545	0.1846
13.6	0.00224	0	0.03248	0.04412	0.24131	0.24942	0.20859	0.21011	0.3041	0.30415	0.16689	0.18672
13.8	0.00225	0	0.03307	0.04442	0.24395	0.25261	0.21005	0.21256	0.30629	0.30754	0.16855	0.18882
14	0.00226	0	0.03298	0.0447	0.2465	0.25579	0.21139	0.21499	0.30887	0.31091	0.16977	0.19091
14.2	0.00233	0	0.03316	0.04499	0.24949	0.25895	0.21243	0.21741	0.31184	0.31425	0.17112	0.19299
14.4	0.00238	0	0.03351	0.04526	0.25253	0.2621	0.21366	0.21981	0.31388	0.31756	0.17268	0.19505
14.6	0.00235	0	0.03401	0.04553	0.25481	0.26524	0.21532	0.2222	0.31597	0.32085	0.1749	0.1971
14.8	0.00237	0	0.03387	0.0458	0.25715	0.26836	0.21654	0.22457	0.31794	0.32412	0.17615	0.19913
15	0.00238	0	0.03358	0.04606	0.26006	0.27147	0.21756	0.22692	0.32054	0.32736	0.17786	0.20116
15.2	0.00242	0	0.03372	0.04631	0.26257	0.27457	0.21897	0.22926	0.32274	0.33057	0.17921	0.20317
15.4	0.00249	0	0.03412	0.04656	0.26542	0.27766	0.22035	0.23159	0.32528	0.33377	0.18027	0.20516
15.6	0.00261	0	0.03457	0.0468	0.2685	0.28074	0.22168	0.2339	0.32737	0.33693	0.1821	0.20715
15.8	0.00268	0	0.03472	0.04704	0.2715	0.2838	0.22398	0.23619	0.33026	0.34007	0.18338	0.20912
16	0.00276	0	0.03534	0.04728	0.27417	0.28685	0.22539	0.23847	0.33213	0.34319	0.18478	0.21107
16.2	0.00285	0	0.03505	0.0475	0.27706	0.28989	0.22699	0.24073	0.33391	0.34629	0.18618	0.21302
16.4	0.00289	0	0.03566	0.04773	0.28006	0.29292	0.2288	0.24298	0.33639	0.34936	0.18729	0.21495
16.6	0.00296	0	0.03607	0.04795	0.28288	0.29593	0.23046	0.24522	0.33858	0.35241	0.18801	0.21687
16.8	0.00304	0	0.03676	0.04816	0.28662	0.29893	0.23293	0.24744	0.34055	0.35543	0.18953	0.21878
17	0.00312	0	0.03758	0.04838	0.2903	0.30192	0.23498	0.24964	0.34295	0.35843	0.1908	0.22068
17.2	0.00318	0	0.03779	0.04858	0.29333	0.3049	0.2367	0.25184	0.3449	0.36141	0.1924	0.22256
17.4	0.00321	0	0.03828	0.04878	0.29612	0.30787	0.23847	0.25401	0.34734	0.36436	0.19455	0.22443
17.6	0.00329	0	0.03821	0.04898	0.29931	0.31082	0.24022	0.25618	0.35001	0.3673	0.19619	0.22629
17.8	0.00336	0	0.03812	0.04918	0.30273	0.31377	0.2426	0.25833	0.35196	0.37021	0.19807	0.22814
18	0.00338	0	0.0381	0.04937	0.30536	0.3167	0.24432	0.26046	0.354	0.37309	0.19979	0.22997
18.2	0.00341	0	0.03779	0.04955	0.30857	0.31962	0.24622	0.26258	0.35656	0.37596	0.20085	0.2318
18.4	0.00346	0	0.03805	0.04974	0.31156	0.32253	0.24833	0.26469	0.35819	0.3788	0.20253	0.23361
18.6	0.00346	0	0.038	0.04992	0.31462	0.32543	0.24981	0.26679	0.36024	0.38162	0.20412	0.23541
18.8	0.00347	0	0.03714	0.05009	0.31783	0.32831	0.25101	0.26887	0.36248	0.38443	0.20569	0.2372
19	0.00349	0	0.03676	0.05026	0.32047	0.33119	0.25236	0.27093	0.36424	0.3872	0.20773	0.23898
19.2	0.00346	0	0.0365	0.05043	0.32357	0.33405	0.25409	0.27299	0.3658	0.38996	0.20926	0.24074
19.4	0.00352	0	0.03676	0.05059	0.32634	0.3369	0.25524	0.27503	0.36768	0.3927	0.21099	0.2425
19.6	0.00354	0	0.03719	0.05076	0.32869	0.33974	0.25641	0.27706	0.36948	0.39541	0.2134	0.24424
19.8	0.00349	0	0.03672	0.05091	0.3312	0.34257	0.25751	0.27907	0.37109	0.39811	0.21437	0.24597
20	0.0035	0	0.0367	0.05107	0.33377	0.34539	0.25915	0.28107	0.37328	0.40078	0.21589	0.24769
20.2	0.00354	0	0.03684	0.05122	0.33667	0.34819	0.26049	0.28306	0.37567	0.40344	0.21747	0.2494
20.4	0.00352	0	0.03739	0.05137	0.33952	0.35099	0.262	0.28503	0.3784	0.40607	0.21875	0.2511
20.6	0.0036	0	0.03752	0.05151	0.34255	0.35377	0.26399	0.287	0.38056	0.40868	0.22046	0.25279
20.8	0.00366	0	0.03818	0.05166	0.34525	0.35654	0.26616	0.28895	0.38275	0.41128	0.22227	0.25446
21	0.00372	0	0.03849	0.0518	0.34752	0.35931	0.2682	0.29088	0.38448	0.41385	0.22418	0.25613
21.2	0.00376	0	0.03885	0.05193	0.35009	0.36206	0.2701	0.29281	0.38633	0.41641	0.22645	0.25779
21.4	0.00377	0	0.03909	0.05207	0.35228	0.3648	0.27232	0.29472	0.38895	0.41894	0.22772	0.25943
21.6	0.00382	0	0.03873	0.0522	0.35528	0.36753	0.27415	0.29662	0.39135	0.42146	0.22885	0.26106
21.8	0.00388	0	0.039	0.05233	0.3581	0.37024	0.27647	0.29851	0.39328	0.42395	0.23015	0.26269
22	0.00389	0	0.03907	0.05245	0.36049	0.37295	0.27783	0.30038	0.3953	0.42643	0.23085	0.2643
22.2	0.004	0	0.03866	0.05258	0.36364	0.37565	0.28009	0.30224	0.39701	0.42889	0.23172	0.2659
22.4	0.00405	0	0.03856	0.0527	0.36677	0.37833	0.28189	0.30409	0.39908	0.43132	0.23299	0.2675
22.6	0.00404	0	0.03873	0.05282	0.36987	0.38101	0.28334	0.30593	0.40125	0.43374	0.23415	0.26908
22.8	0.00411	0	0.03905	0.05293	0.37249	0.38367	0.28512	0.30776	0.40274	0.43615	0.23612	0.27065
23	0.00414	0	0.03862	0.05305	0.37528	0.38633	0.28658	0.30957	0.40455	0.43853	0.23783	0.27221
23.2	0.00414	0	0.0386	0.05316	0.37877	0.38897	0.28815	0.31138	0.40617	0.44089	0.23879	0.27376
23.4	0.0042	0	0.03879	0.05327	0.38133	0.3916	0.28912	0.31317	0.40824	0.44324	0.24007	0.2753
23.6	0.00421	0	0.03928	0.05337	0.38391	0.39423	0.29072	0.31495	0.4103	0.44557	0.24119	0.27684
23.8	0.00421	0	0.03872	0.05348	0.38674	0.39684	0.29217	0.31672	0.41234	0.44788	0.24196	0.27836
24	0.00427	0	0.03926	0.05358	0.38962	0.39944	0.29381	0.31847	0.41473	0.45018	0.24336	0.27987
24.2	0.00432	0	0.03956	0.05368	0.39231	0.40203	0.2946	0.32022	0.41641	0.45245	0.24462	0.28137
24.4	0.00436	0	0.03984	0.05378	0.39501	0.40461	0.29598	0.32195	0.4187	0.45471	0.24659	0.28286
24.6	0.00443	0	0.04014	0.05387	0.39803	0.40718	0.29726	0.32368	0.42067	0.45695	0.24846	0.28435
24.8	0.00443	0	0.04061	0.05397	0.40082	0.40974	0.29886	0.32539	0.42217	0.45918	0.25023	0.28582
25	0.00445	0	0.04062	0.05406	0.40356	0.41229	0.30023	0.32709	0.42426	0.46138	0.25252	0.28728
25.2	0.00441	0	0.04092	0.05415	0.40644	0.41484	0.30184	0.32878	0.42627	0.46357	0.2542	0.28874
25.4	0.00437	0	0.04055	0.05424	0.40873	0.41737	0.30287	0.33046	0.42836	0.46575	0.2555	0.29018
25.6	0.00439	0	0.0407	0.05433	0.41204	0.41989	0.3039	0.33212	0.42953	0.4679	0.25729	0.29162
25.8	0.00439	0	0.04109	0.05441	0.41475	0.4224	0.30493	0.33378	0.43133	0.47004	0.25891	0.29305
26	0.00445	0	0.04108	0.05449	0.41728	0.4249	0.30628	0.33543	0.43244	0.47217	0.26033	0.29446
26.2	0.00452	0	0.04132	0.05458	0.41975	0.42739	0.30806	0.33706	0.4344	0.47428	0.26206	0.29587
26.4	0.00457	0	0.04171	0.05466	0.42287	0.42987	0.30945	0.33869	0.43684	0.47637	0.2633	0.29727
26.6	0.00466	0	0.04247	0.05473	0.42515	0.43234	0.31076	0.3403	0.43866	0.47844	0.26469	0.29866
26.8	0.00471	0	0.04216	0.05481	0.42745	0.4348	0.31215	0.34191	0.44048	0.4805	0.26612	0.30004
27	0.00473	0	0.04168	0.05489	0.42996	0.43725	0.31373	0.3435	0.44271	0.48255	0.26661	0.30141
27.2	0.00473	0	0.04189	0.05496	0.43256	0.43969	0.31562	0.34508	0.44393	0.48458	0.26714	0.30278
27.4	0.0048	0	0.04173	0.05503	0.43448	0.44212	0.31738	0.34665	0.44625	0.48659	0.26804	0.30413
27.6	0.00485	0	0.04204	0.0551	0.43646	0.44454	0.319	0.34822	0.44842	0.48859	0.2689	0.30548
27.8	0.00483	0	0.04179	0.05517	0.43896	0.44696	0.32018	0.34977	0.45061	0.49057	0.26947	0.30681
28	0.00489	0	0.0421	0.05524	0.44148	0.44936	0.3216	0.35131	0.45272	0.49254	0.27047	0.30814
28.2	0.00491	0	0.04186	0.05531	0.44353	0.45175	0.32304	0.35284	0.45467	0.49449	0.27174	0.30946
28.4	0.00495	0	0.04213	0.05537	0.44614	0.45413	0.32425	0.35437	0.45706	0.49643	0.2731	0.31077
28.6	0.00493	0	0.04172	0.05544	0.44914	0.45651	0.32571	0.35588	0.45926	0.49835	0.2738	0.31208
28.8	0.00492	0	0.04113	0.0555	0.45177	0.45887	0.32764	0.35738	0.46116	0.50026	0.2752	0.31337
29	0.00494	0	0.04071	0.05556	0.45381	0.46123	0.32889	0.35887	0.46311	0.50215	0.2768	0.31466
29.2	0.0049	0	0.04152	0.05562	0.45611	0.46357	0.33038	0.36036	0.46458	0.50403	0.27826	0.31594
29.4	0.00497	0	0.04153	0.05568	0.45852	0.46591	0.33155	0.36183	0.46578	0.50589	0.28011	0.31721
29.6	0.00502	0	0.04173	0.05573	0.46162	0.46824	0.33302	0.3633	0.46691	0.50774	0.28218	0.31847
29.8	0.00505	0	0.04186	0.05579	0.46374	0.47056	0.33465	0.36475	0.46894	0.50958	0.28369	0.31972
30	0.00517	0	0.04226	0.05585	0.46574	0.47287	0.3369	0.36619	0.47047	0.5114	0.28482	0.32097
30.2	0.00519	0	0.04277	0.0559	0.46829	0.47516	0.33851	0.36763	0.47298	0.51321	0.28596	0.3222
30.4	0.00529	0	0.04303	0.05595	0.47087	0.47746	0.33979	0.36906	0.47468	0.515	0.28751	0.32343
30.6	0.00537	0	0.04328	0.056	0.47312	0.47974	0.34088	0.37047	0.47575	0.51678	0.28882	0.32465
30.8	0.00537	0	0.04365	0.05606	0.47563	0.48201	0.342	0.37188	0.47742	0.51855	0.29015	0.32587
31	0.00545	0	0.04425	0.05611	0.47837	0.48427	0.34316	0.37328	0.47876	0.5203	0.29149	0.32707
31.2	0.00553	0	0.04417	0.05615	0.48123	0.48653	0.34407	0.37467	0.4798	0.52204	0.293	0.32827
31.4	0.00557	0	0.04431	0.0562	0.48382	0.48877	0.34497	0.37605	0.48146	0.52377	0.29457	0.32946
31.6	0.00558	0	0.0448	0.05625	0.48641	0.49101	0.34585	0.37742	0.48306	0.52548	0.29565	0.33064
31.8	0.00555	0	0.04479	0.05629	0.48949	0.49324	0.34718	0.37879	0.48508	0.52718	0.29674	0.33182
32	0.0056	0	0.04502	0.05634	0.49152	0.49545	0.34851	0.38014	0.48708	0.52887	0.29817	0.33299
32.2	0.00557	0	0.04508	0.05638	0.49338	0.49766	0.3496	0.38149	0.48846	0.53054	0.29907	0.33415
32.4	0.00557	0	0.0454	0.05643	0.49521	0.49987	0.35073	0.38282	0.49037	0.5322	0.30008	0.3353
32.6	0.00555	0	0.04503	0.05647	0.4972	0.50206	0.35211	0.38415	0.49294	0.53385	0.30124	0.33644
32.8	0.0056	0	0.04532	0.05651	0.49884	0.50424	0.35348	0.38547	0.49469	0.53549	0.30258	0.33758
33	0.0056	0	0.04567	0.05655	0.50105	0.50642	0.35503	0.38678	0.49624	0.53711	0.30432	0.33871
33.2	0.00556	0	0.04636	0.05659	0.50346	0.50858	0.35647	0.38808	0.49792	0.53872	0.30615	0.33984
33.4	0.00562	0	0.04564	0.05663	0.50588	0.51074	0.35811	0.38938	0.49899	0.54032	0.30683	0.34095
33.6	0.00557	0	0.04534	0.05667	0.50884	0.51289	0.35994	0.39066	0.5001	0.54191	0.3082	0.34206
33.8	0.0056	0	0.04546	0.0567	0.51095	0.51503	0.36173	0.39194	0.50189	0.54348	0.30888	0.34316
34	0.00561	0	0.0451	0.05674	0.51283	0.51716	0.36336	0.39321	0.50337	0.54504	0.30966	0.34426
34.2	0.00561	0	0.04491	0.05678	0.51506	0.51929	0.36522	0.39447	0.5047	0.54659	0.31069	0.34534
34.4	0.00563	0	0.0444	0.05681	0.51703	0.5214	0.36609	0.39572	0.50609	0.54813	0.31231	0.34642
34.6	0.00566	0	0.04383	0.05685	0.51918	0.52351	0.36721	0.39696	0.50686	0.54966	0.31301	0.3475
34.8	0.00569	0	0.044	0.05688	0.52105	0.52561	0.36866	0.3982	0.50883	0.55117	0.31401	0.34856
35	0.00578	0	0.04394	0.05691	0.52296	0.5277	0.36956	0.39943	0.50975	0.55268	0.31515	0.34962
35.2	0.00585	0	0.044	0.05694	0.52531	0.52978	0.37051	0.40065	0.51084	0.55417	0.31642	0.35068
35.4	0.00588	0	0.04452	0.05698	0.52679	0.53185	0.37147	0.40186	0.51227	0.55565	0.31732	0.35172
35.6	0.00595	0	0.04494	0.05701	0.52857	0.53392	0.37294	0.40306	0.51421	0.55712	0.31784	0.35276
35.8	0.00594	0	0.04533	0.05704	0.53001	0.53597	0.37429	0.40426	0.51607	0.55858	0.31908	0.35379
36	0.00604	0	0.04606	0.05707	0.53095	0.53802	0.37579	0.40545	0.51748	0.56002	0.32003	0.35482
36.2	0.00612	0	0.04624	0.0571	0.53215	0.54006	0.37651	0.40663	0.51915	0.56146	0.32109	0.35584
36.4	0.00622	0	0.04704	0.05712	0.53375	0.5421	0.37803	0.4078	0.52113	0.56288	0.32294	0.35685
36.6	0.00629	0	0.04723	0.05715	0.53596	0.54412	0.37921	0.40897	0.52353	0.5643	0.32456	0.35786
36.8	0.00642	0	0.0477	0.05718	0.53852	0.54614	0.38044	0.41013	0.52494	0.5657	0.32576	0.35886
37	0.00645	0	0.0482	0.05721	0.54113	0.54815	0.382	0.41128	0.52631	0.56709	0.32717	0.35985
37.2	0.00653	0	0.04847	0.05723	0.54322	0.55015	0.38271	0.41242	0.52714	0.56848	0.32827	0.36084
37.4	0.00657	0	0.04853	0.05726	0.54603	0.55214	0.38433	0.41356	0.5284	0.56985	0.32863	0.36182
37.6	0.00653	0	0.0485	0.05728	0.54912	0.55412	0.38527	0.41469	0.52969	0.57121	0.32991	0.36279
37.8	0.00658	0	0.04817	0.05731	0.55131	0.5561	0.38666	0.41581	0.53128	0.57256	0.33081	0.36376
38	0.00656	0	0.04782	0.05733	0.5529	0.55807	0.38816	0.41692	0.53251	0.5739	0.33194	0.36472
38.2	0.00657	0	0.04717	0.05736	0.55534	0.56003	0.3901	0.41803	0.53357	0.57523	0.33305	0.36568
38.4	0.00655	0	0.04609	0.05738	0.55755	0.56198	0.39114	0.41913	0.53506	0.57655	0.33397	0.36663
38.6	0.0066	0	0.04576	0.0574	0.55969	0.56393	0.39261	0.42022	0.53587	0.57786	0.33471	0.36757
38.8	0.00658	0	0.04619	0.05742	0.56206	0.56587	0.39428	0.42131	0.5374	0.57916	0.33557	0.36851
39	0.00653	0	0.04639	0.05745	0.56374	0.5678	0.39535	0.42238	0.53814	0.58045	0.33689	0.36944
39.2	0.00653	0	0.04679	0.05747	0.56632	0.56972	0.39649	0.42346	0.5397	0.58172	0.338	0.37036
39.4	0.00655	0	0.04723	0.05749	0.56802	0.57163	0.39717	0.42452	0.54105	0.58299	0.3386	0.37128
39.6	0.0066	0	0.04783	0.05751	0.5701	0.57354	0.39885	0.42558	0.54235	0.58425	0.33985	0.37219
39.8	0.00662	0	0.04825	0.05753	0.57184	0.57544	0.39991	0.42663	0.54384	0.5855	0.34119	0.3731
40	0.0067	0	0.04872	0.05755	0.57381	0.57733	0.40043	0.42767	0.54566	0.58675	0.34213	0.374
40.2	0.00671	0	0.04911	0.05757	0.57559	0.57922	0.40066	0.42871	0.54777	0.58798	0.34373	0.3749
40.4	0.00677	0	0.04933	0.05759	0.57746	0.5811	0.40204	0.42974	0.54936	0.5892	0.34482	0.37579
40.6	0.00682	0	0.04976	0.0576	0.58	0.58296	0.40267	0.43076	0.55148	0.59041	0.34547	0.37667
40.8	0.00692	0	0.05022	0.05762	0.58218	0.58483	0.40343	0.43178	0.55302	0.59162	0.34656	0.37755
41	0.00696	0	0.05044	0.05764	0.58393	0.58668	0.40507	0.43279	0.55484	0.59281	0.34745	0.37842
41.2	0.00703	0	0.05024	0.05766	0.58576	0.58853	0.40589	0.43379	0.55658	0.59399	0.34873	0.37929
41.4	0.00699	0	0.05072	0.05767	0.58843	0.59037	0.4071	0.43479	0.55843	0.59517	0.34961	0.38015
41.6	0.007	0	0.05031	0.05769	0.59041	0.5922	0.40772	0.43578	0.56001	0.59634	0.35086	0.38101
41.8	0.00704	0	0.05033	0.05771	0.59249	0.59403	0.40968	0.43676	0.562	0.5975	0.35219	0.38186
42	0.0071	0	0.05006	0.05772	0.59441	0.59585	0.411	0.43774	0.56319	0.59864	0.35317	0.3827
42.2	0.00715	0	0.04907	0.05774	0.59692	0.59766	0.41306	0.43871	0.56422	0.59978	0.35379	0.38354
42.4	0.00714	0	0.04885	0.05775	0.59847	0.59946	0.41424	0.43968	0.5657	0.60092	0.35427	0.38438
42.6	0.00717	0	0.04859	0.05777	0.60049	0.60126	0.41556	0.44064	0.56647	0.60204	0.35547	0.38521
42.8	0.00718	0	0.04892	0.05778	0.60263	0.60305	0.41687	0.44159	0.5676	0.60315	0.35587	0.38603
43	0.00716	0	0.04949	0.0578	0.60418	0.60483	0.41811	0.44254	0.56874	0.60426	0.35732	0.38685
43.2	0.00728	0	0.04985	0.05781	0.60667	0.6066	0.41878	0.44348	0.57043	0.60536	0.35854	0.38766
43.4	0.0073	0	0.0503	0.05783	0.60846	0.60837	0.41965	0.44441	0.57085	0.60645	0.35908	0.38847
43.6	0.00734	0	0.05092	0.05784	0.61001	0.61013	0.42061	0.44534	0.57239	0.60753	0.35984	0.38927
43.8	0.00733	0	0.05133	0.05785	0.61129	0.61189	0.42103	0.44626	0.57385	0.6086	0.36049	0.39007
44	0.00734	0	0.05163	0.05787	0.61276	0.61364	0.42082	0.44718	0.57462	0.60966	0.36086	0.39086
44.2	0.00737	0	0.0522	0.05788	0.61424	0.61538	0.42231	0.44809	0.57581	0.61072	0.362	0.39165
44.4	0.00741	0	0.05245	0.05789	0.61598	0.61711	0.4233	0.44899	0.57654	0.61177	0.36273	0.39243
44.6	0.00746	0	0.05249	0.0579	0.61798	0.61884	0.42405	0.44989	0.57774	0.61281	0.3642	0.3932
44.8	0.00747	0	0.05296	0.05792	0.61995	0.62055	0.42507	0.45079	0.57848	0.61384	0.36596	0.39398
45	0.00747	0	0.05294	0.05793	0.62143	0.62227	0.42625	0.45167	0.57992	0.61486	0.36659	0.39474
45.2	0.00749	0	0.05319	0.05794	0.62324	0.62397	0.42702	0.45255	0.58115	0.61588	0.36819	0.39551
45.4	0.00743	0	0.05357	0.05795	0.62517	0.62567	0.42816	0.45343	0.5822	0.61689	0.36919	0.39626
45.6	0.00744	0	0.05271	0.05796	0.62697	0.62737	0.42918	0.4543	0.58352	0.61789	0.36998	0.39701
45.8	0.00743	0	0.05257	0.05797	0.62865	0.62905	0.43113	0.45516	0.58476	0.61888	0.37093	0.39776
46	0.00743	0	0.05187	0.05798	0.62986	0.63073	0.43209	0.45602	0.58577	0.61987	0.37118	0.3985
46.2	0.00746	0	0.05129	0.05799	0.63132	0.6324	0.43341	0.45687	0.58696	0.62085	0.37153	0.39924
46.4	0.00746	0	0.05073	0.058	0.6326	0.63407	0.4343	0.45772	0.58798	0.62182	0.37246	0.39998
46.6	0.00751	0	0.05042	0.05801	0.63485	0.63573	0.43584	0.45856	0.58885	0.62278	0.3738	0.4007
46.8	0.00754	0	0.05068	0.05802	0.63679	0.63738	0.43676	0.4594	0.58984	0.62374	0.37472	0.40143
47	0.00752	0	0.05106	0.05803	0.63845	0.63903	0.43765	0.46023	0.59106	0.62468	0.37665	0.40215
47.2	0.00761	0	0.05091	0.05804	0.64043	0.64067	0.43884	0.46106	0.59261	0.62563	0.37757	0.40286
47.4	0.00758	0	0.05119	0.05805	0.64194	0.6423	0.44	0.46188	0.5935	0.62656	0.37792	0.40357
47.6	0.00759	0	0.0515	0.05806	0.64344	0.64392	0.44013	0.46269	0.59505	0.62749	0.37884	0.40427
47.8	0.00758	0	0.0515	0.05807	0.64509	0.64554	0.44055	0.4635	0.59605	0.62841	0.38044	0.40498
48	0.00761	0	0.05175	0.05808	0.64714	0.64716	0.44129	0.46431	0.59715	0.62932	0.38154	0.40567
48.2	0.00766	0	0.0527	0.05809	0.64887	0.64877	0.44331	0.46511	0.5986	0.63022	0.38269	0.40636
48.4	0.00773	0	0.05305	0.05809	0.65055	0.65037	0.44402	0.4659	0.5999	0.63112	0.3837	0.40705
48.6	0.00781	0	0.05344	0.0581	0.65214	0.65196	0.4447	0.46669	0.60185	0.63202	0.3844	0.40773
48.8	0.00784	0	0.05481	0.05811	0.6541	0.65355	0.44551	0.46747	0.60338	0.6329	0.385	0.40841
49	0.00791	0	0.05508	0.05812	0.65552	0.65513	0.44655	0.46825	0.60472	0.63378	0.38591	0.40908
49.2	0.00798	0	0.05553	0.05812	0.65723	0.65671	0.44755	0.46902	0.60634	0.63465	0.38723	0.40975
49.4	0.008	0	0.05548	0.05813	0.65867	0.65827	0.44839	0.46979	0.60749	0.63552	0.38771	0.41042
49.6	0.00806	0	0.05493	0.05814	0.66043	0.65984	0.44902	0.47056	0.6081	0.63637	0.38797	0.41108
49.8	0.00806	0	0.05507	0.05815	0.6613	0.66139	0.45091	0.47132	0.60891	0.63723	0.38826	0.41174
50	0.00808	0	0.05459	0.05815	0.66284	0.66294	0.45183	0.47207	0.61022	0.63807	0.3885	0.41239
50.2	0.00813	0	0.05438	0.05816	0.66492	0.66449	0.45318	0.47282	0.61092	0.63891	0.38936	0.41304
50.4	0.00811	0	0.05402	0.05817	0.66639	0.66603	0.45416	0.47356	0.61169	0.63974	0.39	0.41368
50.6	0.00816	0	0.05404	0.05817	0.66839	0.66756	0.45486	0.4743	0.61242	0.64057	0.39073	0.41432
50.8	0.00823	0	0.05405	0.05818	0.67024	0.66909	0.45509	0.47504	0.61283	0.64139	0.39221	0.41496
51	0.00824	0	0.0544	0.05819	0.67187	0.67061	0.4555	0.47576	0.61369	0.6422	0.39342	0.41559
51.2	0.0083	0	0.05386	0.05819	0.67405	0.67212	0.45618	0.47649	0.61479	0.64301	0.3943	0.41622
51.4	0.00824	0	0.05412	0.0582	0.67571	0.67363	0.45671	0.47721	0.61542	0.64381	0.39521	0.41684
51.6	0.00823	0	0.05441	0.0582	0.67737	0.67513	0.45703	0.47793	0.61613	0.6446	0.39624	0.41746
51.8	0.00828	0	0.05424	0.05821	0.67922	0.67662	0.45783	0.47864	0.61747	0.64539	0.39736	0.41808
52	0.0083	0	0.05432	0.05822	0.68067	0.67811	0.45931	0.47934	0.61866	0.64618	0.3978	0.41869
52.2	0.00832	0	0.05433	0.05822	0.68178	0.6796	0.4606	0.48004	0.61986	0.64695	0.39801	0.41929
52.4	0.00837	0	0.05433	0.05823	0.68288	0.68108	0.4615	0.48074	0.62134	0.64772	0.39863	0.4199
52.6	0.00836	0	0.05406	0.05823	0.68423	0.68255	0.46232	0.48143	0.62299	0.64849	0.39955	0.4205
52.8	0.00837	0	0.05429	0.05824	0.68517	0.68402	0.46328	0.48212	0.62371	0.64925	0.40031	0.42109
53	0.0084	0	0.05411	0.05824	0.6862	0.68548	0.46464	0.48281	0.6252	0.65	0.40175	0.42169
53.2	0.00842	0	0.05396	0.05825	0.68723	0.68693	0.46514	0.48348	0.62662	0.65075	0.40184	0.42227
53.4	0.00848	0	0.05392	0.05825	0.68841	0.68838	0.46573	0.48416	0.62747	0.65149	0.40201	0.42286
53.6	0.0085	0	0.05406	0.05826	0.68948	0.68982	0.46654	0.48483	0.62835	0.65223	0.40217	0.42344
53.8	0.00849	0	0.05443	0.05826	0.69074	0.69126	0.46799	0.4855	0.6293	0.65296	0.40284	0.42402
54	0.00853	0	0.0547	0.05827	0.69242	0.69269	0.46879	0.48616	0.6309	0.65368	0.40405	0.42459
54.2	0.00852	0	0.05594	0.05827	0.69403	0.69412	0.46925	0.48682	0.63174	0.6544	0.40504	0.42516
54.4	0.00852	0	0.0563	0.05828	0.69516	0.69554	0.46964	0.48747	0.63255	0.65511	0.40543	0.42573
54.6	0.00862	0	0.05711	0.05828	0.69699	0.69695	0.4707	0.48812	0.63322	0.65582	0.40675	0.42629
54.8	0.00862	0	0.05775	0.05828	0.69872	0.69836	0.47123	0.48876	0.63435	0.65653	0.40865	0.42685
55	0.00864	0	0.05846	0.05829	0.70017	0.69977	0.47218	0.4894	0.63551	0.65722	0.4095	0.4274
55.2	0.00871	0	0.05881	0.05829	0.70209	0.70117	0.47322	0.49004	0.63644	0.65792	0.41095	0.42795
55.4	0.00872	0	0.05973	0.0583	0.70415	0.70256	0.47416	0.49067	0.63734	0.6586	0.41197	0.4285
55.6	0.00879	0	0.05983	0.0583	0.70606	0.70395	0.47452	0.4913	0.638	0.65928	0.41312	0.42905
55.8	0.0088	0	0.059	0.0583	0.70745	0.70533	0.47585	0.49192	0.63937	0.65996	0.4141	0.42959
56	0.0088	0	0.0581	0.05831	0.70868	0.7067	0.47699	0.49254	0.64077	0.66063	0.41465	0.43012
56.2	0.00884	0	0.05747	0.05831	0.71027	0.70807	0.4779	0.49316	0.64151	0.6613	0.41549	0.43066
56.4	0.00883	0	0.05717	0.05832	0.71181	0.70944	0.47899	0.49377	0.64235	0.66196	0.41612	0.43119
56.6	0.00882	0	0.05655	0.05832	0.71326	0.7108	0.47965	0.49438	0.64313	0.66262	0.41667	0.43172
56.8	0.00888	0	0.05634	0.05832	0.71447	0.71215	0.48002	0.49498	0.64387	0.66327	0.41698	0.43224
57	0.00893	0	0.05589	0.05833	0.71608	0.7135	0.48047	0.49558	0.64524	0.66391	0.41769	0.43276
57.2	0.00901	0	0.05596	0.05833	0.71694	0.71484	0.4802	0.49618	0.64605	0.66455	0.41734	0.43328
57.4	0.00907	0	0.05635	0.05833	0.71826	0.71618	0.48097	0.49677	0.64684	0.66519	0.41818	0.43379
57.6	0.00908	0	0.05666	0.05834	0.72007	0.71752	0.48188	0.49736	0.64755	0.66582	0.41882	0.4343
57.8	0.00908	0	0.05673	0.05834	0.72186	0.71884	0.48267	0.49795	0.64795	0.66645	0.41983	0.43481
58	0.00909	0	0.05714	0.05834	0.72354	0.72016	0.48384	0.49853	0.64853	0.66707	0.41964	0.43531
58.2	0.0091	0	0.05768	0.05834	0.72511	0.72148	0.48489	0.4991	0.649	0.66769	0.41976	0.43581
58.4	0.00915	0	0.05745	0.05835	0.72637	0.72279	0.48576	0.49968	0.64992	0.6683	0.4199	0.43631
58.6	0.00919	0	0.05762	0.05835	0.72782	0.7241	0.4868	0.50025	0.65119	0.66891	0.42084	0.4368
58.8	0.00921	0	0.05762	0.05835	0.72919	0.7254	0.48739	0.50081	0.65236	0.66951	0.42194	0.43729
59	0.00933	0	0.05786	0.05836	0.73044	0.7267	0.48805	0.50138	0.65344	0.67011	0.42257	0.43778
59.2	0.00937	0	0.05789	0.05836	0.73163	0.72799	0.48867	0.50193	0.65434	0.6707	0.42391	0.43827
59.4	0.00943	0	0.05793	0.05836	0.73338	0.72927	0.48974	0.50249	0.65558	0.67129	0.42475	0.43875
59.6	0.00951	0	0.05702	0.05836	0.73436	0.73056	0.49059	0.50304	0.65673	0.67188	0.42577	0.43923
59.8	0.00952	0	0.05667	0.05837	0.73504	0.73183	0.492	0.50359	0.65848	0.67246	0.42653	0.4397
60	0.00956	0	0.05646	0.05837	0.73605	0.7331	0.49253	0.50413	0.65965	0.67303	0.42692	0.44017
60.2	0.00955	0	0.05679	0.05837	0.73786	0.73437	0.49289	0.50467	0.66061	0.6736	0.42777	0.44064
60.4	0.00952	0	0.05698	0.05837	0.73906	0.73563	0.4936	0.50521	0.66161	0.67417	0.42798	0.44111
60.6	0.00956	0	0.05715	0.05838	0.73971	0.73688	0.49422	0.50575	0.66246	0.67473	0.42907	0.44157
60.8	0.0096	0	0.05714	0.05838	0.7405	0.73813	0.49444	0.50628	0.66349	0.67529	0.42984	0.44203
61	0.00959	0	0.0575	0.05838	0.74104	0.73938	0.49515	0.5068	0.66454	0.67584	0.43064	0.44249
61.2	0.00961	0	0.05789	0.05838	0.74211	0.74062	0.49567	0.50733	0.66536	0.67639	0.4314	0.44294
61.4	0.00958	0	0.05878	0.05839	0.74408	0.74186	0.49622	0.50785	0.66561	0.67694	0.43231	0.4434
61.6	0.00958	0	0.05917	0.05839	0.74522	0.74309	0.49662	0.50836	0.66655	0.67748	0.43255	0.44384
61.8	0.0096	0	0.05934	0.05839	0.74682	0.74431	0.49701	0.50888	0.66738	0.67802	0.43274	0.44429
62	0.0096	0	0.05963	0.05839	0.74861	0.74553	0.4975	0.50939	0.66892	0.67855	0.43241	0.44473
62.2	0.00966	0	0.05952	0.05839	0.75003	0.74675	0.49781	0.50989	0.67003	0.67908	0.43332	0.44517
62.4	0.0097	0	0.05955	0.0584	0.75103	0.74796	0.49756	0.5104	0.67071	0.67961	0.43407	0.44561
62.6	0.0097	0	0.05941	0.0584	0.75236	0.74917	0.49776	0.5109	0.67127	0.68013	0.43505	0.44604
62.8	0.00977	0	0.05922	0.0584	0.75369	0.75037	0.49827	0.51139	0.67206	0.68064	0.43572	0.44647
63	0.00985	0	0.05957	0.0584	0.75442	0.75157	0.49864	0.51189	0.67325	0.68116	0.4364	0.4469
63.2	0.00989	0	0.05966	0.0584	0.75558	0.75276	0.50006	0.51238	0.67419	0.68167	0.43758	0.44733
63.4	0.00995	0	0.05957	0.0584	0.75754	0.75395	0.50133	0.51286	0.67535	0.68217	0.43862	0.44775
63.6	0.00995	0	0.05959	0.05841	0.75919	0.75513	0.50198	0.51335	0.67601	0.68267	0.43925	0.44817
63.8	0.00995	0	0.05962	0.05841	0.76075	0.75631	0.50331	0.51383	0.67677	0.68317	0.44049	0.44859
64	0.00994	0	0.05984	0.05841	0.7626	0.75748	0.50457	0.51431	0.67765	0.68367	0.44113	0.44901
64.2	0.00992	0	0.05972	0.05841	0.76437	0.75865	0.50569	0.51478	0.67894	0.68416	0.44232	0.44942
64.4	0.00992	0	0.05927	0.05841	0.76533	0.75981	0.5072	0.51525	0.67922	0.68464	0.44307	0.44983
64.6	0.00987	0	0.05979	0.05841	0.76601	0.76097	0.50819	0.51572	0.68055	0.68512	0.44424	0.45023
64.8	0.00989	0	0.05992	0.05842	0.76711	0.76213	0.50933	0.51619	0.68097	0.6856	0.44485	0.45064
65	0.0099	0	0.06008	0.05842	0.76852	0.76328	0.51091	0.51665	0.6813	0.68608	0.44562	0.45104
65.2	0.00994	0	0.06008	0.05842	0.76995	0.76442	0.51097	0.51711	0.68212	0.68655	0.44646	0.45144
65.4	0.00998	0	0.06073	0.05842	0.77062	0.76556	0.5115	0.51757	0.68222	0.68702	0.44653	0.45184
65.6	0.01003	0	0.06042	0.05842	0.77144	0.7667	0.51229	0.51802	0.68322	0.68748	0.44732	0.45223
65.8	0.01003	0	0.06055	0.05842	0.77311	0.76783	0.51297	0.51847	0.68381	0.68794	0.44709	0.45262
66	0.01007	0	0.06088	0.05842	0.77402	0.76896	0.51352	0.51892	0.6847	0.6884	0.44764	0.45301
66.2	0.01013	0	0.06047	0.05843	0.77503	0.77008	0.51388	0.51936	0.68468	0.68885	0.44799	0.4534
66.4	0.01017	0	0.06025	0.05843	0.7757	0.7712	0.514	0.51981	0.68468	0.6893	0.448	0.45378
66.6	0.01018	0	0.06024	0.05843	0.77671	0.77232	0.51424	0.52025	0.68522	0.68975	0.44823	0.45416
66.8	0.01022	0	0.06011	0.05843	0.77737	0.77343	0.51495	0.52068	0.68574	0.69019	0.44843	0.45454
67	0.01029	0	0.06018	0.05843	0.77805	0.77453	0.51558	0.52112	0.68641	0.69063	0.44869	0.45492
67.2	0.0103	0	0.06014	0.05843	0.78009	0.77563	0.51651	0.52155	0.68693	0.69107	0.44938	0.45529
67.4	0.01029	0	0.06002	0.05843	0.78185	0.77673	0.51679	0.52197	0.68744	0.6915	0.44974	0.45566
67.6	0.01034	0	0.06079	0.05843	0.78332	0.77782	0.51788	0.5224	0.68785	0.69193	0.45038	0.45603
67.8	0.01039	0	0.06149	0.05844	0.78458	0.77891	0.51908	0.52282	0.68933	0.69236	0.4516	0.4564
68	0.01041	0	0.06166	0.05844	0.78573	0.77999	0.5198	0.52324	0.69079	0.69278	0.45175	0.45677
68.2	0.01047	0	0.06128	0.05844	0.78664	0.78107	0.51989	0.52366	0.69231	0.69321	0.45246	0.45713
68.4	0.0105	0	0.06152	0.05844	0.78783	0.78215	0.52025	0.52407	0.69339	0.69362	0.45276	0.45749
68.6	0.01055	0	0.06194	0.05844	0.78856	0.78322	0.52087	0.52448	0.69504	0.69404	0.45346	0.45784
68.8	0.01067	0	0.06178	0.05844	0.78997	0.78428	0.52205	0.52489	0.69519	0.69445	0.45393	0.4582
69	0.0107	0	0.06224	0.05844	0.79115	0.78535	0.52289	0.5253	0.69612	0.69485	0.45472	0.45855
69.2	0.01076	0	0.06272	0.05844	0.79193	0.7864	0.52276	0.5257	0.6973	0.69526	0.45539	0.4589
69.4	0.01076	0	0.06349	0.05844	0.79251	0.78746	0.52327	0.5261	0.69724	0.69566	0.45573	0.45925
69.6	0.01073	0	0.06398	0.05844	0.79341	0.78851	0.52324	0.5265	0.69817	0.69606	0.45681	0.4596
69.8	0.01071	0	0.0645	0.05845	0.79443	0.78955	0.5246	0.5269	0.69865	0.69645	0.45692	0.45994
70	0.01079	0	0.06466	0.05845	0.79528	0.79059	0.52489	0.52729	0.69883	0.69685	0.45844	0.46028
70.2	0.01078	0	0.06443	0.05845	0.79646	0.79163	0.52474	0.52768	0.69904	0.69723	0.4587	0.46062
70.4	0.01071	0	0.06461	0.05845	0.7974	0.79267	0.52529	0.52807	0.69932	0.69762	0.45964	0.46096
70.6	0.01063	0	0.06482	0.05845	0.79865	0.79369	0.52635	0.52845	0.69933	0.698	0.45996	0.4613
70.8	0.01063	0	0.06506	0.05845	0.79945	0.79472	0.52685	0.52884	0.69905	0.69838	0.46025	0.46163
71	0.01062	0	0.06537	0.05845	0.80088	0.79574	0.52756	0.52922	0.69926	0.69876	0.46029	0.46196
71.2	0.01058	0	0.06518	0.05845	0.80215	0.79676	0.52814	0.5296	0.69987	0.69914	0.46125	0.46229
71.4	0.01058	0	0.06527	0.05845	0.803	0.79777	0.52849	0.52997	0.70006	0.69951	0.46205	0.46262
71.6	0.01062	0	0.06555	0.05845	0.8035	0.79878	0.52943	0.53034	0.70094	0.69988	0.46262	0.46294
71.8	0.01062	0	0.06483	0.05845	0.80403	0.79978	0.52938	0.53072	0.7023	0.70024	0.46313	0.46326
72	0.01068	0	0.06385	0.05845	0.80536	0.80078	0.52954	0.53108	0.70295	0.70061	0.46344	0.46358
72.2	0.01074	0	0.0635	0.05845	0.80664	0.80178	0.5299	0.53145	0.70403	0.70097	0.46412	0.4639
72.4	0.01078	0	0.06324	0.05846	0.80779	0.80277	0.53111	0.53181	0.70461	0.70132	0.4647	0.46422
72.6	0.01079	0	0.06306	0.05846	0.80857	0.80376	0.53148	0.53217	0.70517	0.70168	0.46587	0.46453
72.8	0.01084	0	0.06337	0.05846	0.80995	0.80475	0.5321	0.53253	0.7063	0.70203	0.46657	0.46485
73	0.01091	0	0.06344	0.05846	0.81101	0.80573	0.53244	0.53289	0.70794	0.70238	0.46772	0.46516
73.2	0.01099	0	0.06352	0.05846	0.81217	0.8067	0.53217	0.53324	0.70881	0.70273	0.46805	0.46546
73.4	0.01105	0	0.06333	0.05846	0.81267	0.80768	0.53279	0.5336	0.70915	0.70307	0.46878	0.46577
73.6	0.01111	0	0.06321	0.05846	0.81357	0.80865	0.53316	0.53395	0.7103	0.70341	0.46961	0.46607
73.8	0.01118	0	0.06308	0.05846	0.81452	0.80961	0.53449	0.53429	0.71094	0.70375	0.46981	0.46638
74	0.01132	0	0.06374	0.05846	0.81568	0.81057	0.53442	0.53464	0.71174	0.70409	0.47056	0.46668
74.2	0.01138	0	0.06406	0.05846	0.81704	0.81153	0.53466	0.53498	0.71247	0.70442	0.47076	0.46697
74.4	0.01136	0	0.06422	0.05846	0.8182	0.81248	0.53572	0.53532	0.71291	0.70475	0.47119	0.46727
74.6	0.01139	0	0.06492	0.05846	0.81917	0.81343	0.53649	0.53566	0.7132	0.70508	0.47104	0.46757
74.8	0.01145	0	0.06544	0.05846	0.82004	0.81438	0.53663	0.536	0.71386	0.70541	0.47133	0.46786
75	0.0114	0	0.0658	0.05846	0.82166	0.81532	0.53735	0.53633	0.7144	0.70573	0.47196	0.46815
75.2	0.01143	0	0.06571	0.05846	0.82285	0.81626	0.53795	0.53666	0.7156	0.70605	0.47265	0.46844
75.4	0.01142	0	0.06581	0.05846	0.82391	0.8172	0.53846	0.53699	0.71598	0.70637	0.47283	0.46873
75.6	0.01142	0	0.0658	0.05846	0.82478	0.81813	0.53923	0.53732	0.71717	0.70669	0.47332	0.46901
75.8	0.0114	0	0.06579	0.05847	0.82565	0.81906	0.5397	0.53765	0.71812	0.707	0.4739	0.46929
76	0.0114	0	0.06571	0.05847	0.82686	0.81998	0.54028	0.53797	0.71858	0.70731	0.47451	0.46958
76.2	0.01133	0	0.06538	0.05847	0.82747	0.8209	0.5411	0.53829	0.71949	0.70762	0.47509	0.46986
76.4	0.01131	0	0.06543	0.05847	0.82813	0.82182	0.54198	0.53861	0.72013	0.70793	0.47591	0.47013
76.6	0.0113	0	0.06561	0.05847	0.82882	0.82273	0.54216	0.53893	0.72128	0.70823	0.47714	0.47041
76.8	0.01135	0	0.06523	0.05847	0.82986	0.82364	0.54333	0.53924	0.72309	0.70854	0.4776	0.47068
77	0.01132	0	0.0647	0.05847	0.83051	0.82455	0.54418	0.53955	0.72352	0.70884	0.47827	0.47096
77.2	0.01133	0	0.06422	0.05847	0.83116	0.82545	0.54469	0.53987	0.72372	0.70913	0.47825	0.47123
77.4	0.01138	0	0.0632	0.05847	0.83139	0.82635	0.54612	0.54017	0.7242	0.70943	0.47897	0.4715
77.6	0.01137	0	0.06273	0.05847	0.83184	0.82724	0.54644	0.54048	0.72504	0.70972	0.47964	0.47176
77.8	0.01143	0	0.0629	0.05847	0.83288	0.82813	0.54739	0.54079	0.72516	0.71001	0.47907	0.47203
78	0.01148	0	0.0634	0.05847	0.83422	0.82902	0.54797	0.54109	0.72538	0.7103	0.47995	0.47229
78.2	0.01146	0	0.06351	0.05847	0.83533	0.82991	0.54825	0.54139	0.72576	0.71059	0.48027	0.47256
78.4	0.01148	0	0.06384	0.05847	0.83633	0.83079	0.54929	0.54169	0.7265	0.71087	0.48089	0.47282
78.6	0.01147	0	0.06465	0.05847	0.83778	0.83166	0.5499	0.54199	0.72689	0.71115	0.48129	0.47307
78.8	0.01146	0	0.06504	0.05847	0.83949	0.83254	0.55034	0.54228	0.72718	0.71143	0.48181	0.47333
79	0.01146	0	0.06582	0.05847	0.84163	0.83341	0.55073	0.54258	0.72756	0.71171	0.4822	0.47359
79.2	0.0115	0	0.06581	0.05847	0.8429	0.83428	0.55099	0.54287	0.72833	0.71199	0.48233	0.47384
79.4	0.01156	0	0.06557	0.05847	0.84395	0.83514	0.55103	0.54316	0.72836	0.71226	0.48246	0.47409
79.6	0.0116	0	0.06598	0.05847	0.8449	0.836	0.55146	0.54344	0.7287	0.71253	0.4829	0.47434
79.8	0.01163	0	0.06602	0.05847	0.84525	0.83686	0.55188	0.54373	0.72918	0.7128	0.48315	0.47459
80	0.01166	0	0.06581	0.05847	0.84579	0.83771	0.55179	0.54401	0.72924	0.71307	0.48372	0.47484
80.2	0.0117	0	0.06607	0.05847	0.8465	0.83856	0.55235	0.5443	0.73049	0.71333	0.48459	0.47509
80.4	0.01177	0	0.06636	0.05847	0.84712	0.83941	0.55325	0.54458	0.73143	0.7136	0.48556	0.47533
80.6	0.01179	0	0.06662	0.05847	0.84825	0.84025	0.55345	0.54485	0.73227	0.71386	0.4859	0.47557
80.8	0.01184	0	0.06601	0.05847	0.8492	0.84109	0.55388	0.54513	0.73279	0.71412	0.486	0.47581
81	0.01185	0	0.06559	0.05848	0.84913	0.84193	0.55424	0.54541	0.73273	0.71437	0.48678	0.47605
81.2	0.01193	0	0.06485	0.05848	0.84988	0.84276	0.55458	0.54568	0.73327	0.71463	0.48749	0.47629
81.4	0.01192	0	0.06463	0.05848	0.85043	0.84359	0.55446	0.54595	0.73376	0.71488	0.48826	0.47653
81.6	0.01191	0	0.06488	0.05848	0.85097	0.84442	0.5545	0.54622	0.73403	0.71513	0.48942	0.47676
81.8	0.01196	0	0.06527	0.05848	0.85165	0.84524	0.55495	0.54649	0.73472	0.71538	0.48947	0.477
82	0.01189	0	0.06589	0.05848	0.85243	0.84606	0.55533	0.54675	0.73588	0.71563	0.49051	0.47723
82.2	0.01186	0	0.06622	0.05848	0.85354	0.84688	0.55532	0.54702	0.73733	0.71587	0.49094	0.47746
82.4	0.01187	0	0.06646	0.05848	0.85465	0.84769	0.55567	0.54728	0.73834	0.71612	0.49158	0.47769
82.6	0.01187	0	0.06656	0.05848	0.8555	0.8485	0.55545	0.54754	0.73918	0.71636	0.49148	0.47792
82.8	0.01186	0	0.06579	0.05848	0.85643	0.84931	0.55581	0.5478	0.74023	0.7166	0.49183	0.47814
83	0.01186	0	0.06573	0.05848	0.85756	0.85011	0.55629	0.54806	0.74057	0.71684	0.49211	0.47837
83.2	0.01185	0	0.06508	0.05848	0.85845	0.85091	0.55688	0.54831	0.74112	0.71707	0.49205	0.47859
83.4	0.01191	0	0.06456	0.05848	0.85915	0.85171	0.55768	0.54857	0.74127	0.71731	0.4917	0.47881
83.6	0.01187	0	0.06497	0.05848	0.85981	0.8525	0.55894	0.54882	0.74194	0.71754	0.49198	0.47903
83.8	0.01188	0	0.06552	0.05848	0.86047	0.85329	0.55989	0.54907	0.7429	0.71777	0.49253	0.47925
84	0.01189	0	0.06573	0.05848	0.86131	0.85408	0.56035	0.54932	0.74301	0.718	0.49302	0.47947
84.2	0.01193	0	0.06596	0.05848	0.86279	0.85487	0.56068	0.54957	0.74424	0.71823	0.49332	0.47968
84.4	0.01196	0	0.06635	0.05848	0.86413	0.85565	0.56158	0.54981	0.74441	0.71845	0.49336	0.4799
84.6	0.01199	0	0.06653	0.05848	0.86511	0.85643	0.56195	0.55006	0.74479	0.71868	0.4935	0.48011
84.8	0.01204	0	0.06651	0.05848	0.86566	0.8572	0.56255	0.5503	0.74486	0.7189	0.49397	0.48032
85	0.01208	0	0.06657	0.05848	0.86633	0.85798	0.56284	0.55054	0.74544	0.71912	0.49491	0.48053
85.2	0.01217	0	0.06687	0.05848	0.86779	0.85874	0.5632	0.55078	0.74592	0.71934	0.49602	0.48074
85.4	0.01221	0	0.0672	0.05848	0.86842	0.85951	0.56297	0.55102	0.7459	0.71956	0.49719	0.48095
85.6	0.01229	0	0.0671	0.05848	0.86854	0.86027	0.56389	0.55126	0.74657	0.71977	0.49777	0.48116
85.8	0.01237	0	0.06713	0.05848	0.86891	0.86103	0.56396	0.55149	0.7474	0.71999	0.49812	0.48136
86	0.01239	0	0.06731	0.05848	0.87002	0.86179	0.56412	0.55173	0.74811	0.7202	0.49848	0.48157
86.2	0.01249	0	0.06752	0.05848	0.87078	0.86255	0.5643	0.55196	0.74936	0.72041	0.49873	0.48177
86.4	0.01258	0	0.06746	0.05848	0.87102	0.8633	0.56541	0.55219	0.74942	0.72062	0.49902	0.48197
86.6	0.01267	0	0.06663	0.05848	0.87108	0.86405	0.5662	0.55242	0.7506	0.72083	0.49911	0.48217
86.8	0.01267	0	0.06578	0.05848	0.87202	0.86479	0.56763	0.55265	0.75054	0.72103	0.49957	0.48237
87	0.0126	0	0.06587	0.05848	0.87254	0.86553	0.56862	0.55287	0.75058	0.72124	0.49972	0.48256
87.2	0.01263	0	0.06529	0.05848	0.87318	0.86627	0.56905	0.5531	0.75132	0.72144	0.49957	0.48276
87.4	0.01266	0	0.0652	0.05848	0.87341	0.86701	0.56969	0.55332	0.75119	0.72164	0.49957	0.48296
87.6	0.01263	0	0.0657	0.05848	0.87401	0.86774	0.57021	0.55354	0.75183	0.72184	0.5	0.48315
87.8	0.01261	0	0.06635	0.05848	0.87477	0.86847	0.57004	0.55376	0.75278	0.72204	0.50039	0.48334
88	0.01258	0	0.06645	0.05848	0.87544	0.8692	0.57046	0.55398	0.75308	0.72223	0.50053	0.48353
88.2	0.01255	0	0.06696	0.05848	0.8763	0.86993	0.57068	0.5542	0.75392	0.72243	0.50066	0.48372
88.4	0.01252	0	0.06742	0.05848	0.87714	0.87065	0.57173	0.55441	0.75446	0.72262	0.50103	0.48391
88.6	0.01252	0	0.06725	0.05848	0.87798	0.87137	0.57226	0.55463	0.75505	0.72281	0.50169	0.4841
88.8	0.0125	0	0.06752	0.05848	0.87978	0.87208	0.57252	0.55484	0.7552	0.723	0.50237	0.48428
89	0.01254	0	0.06725	0.05848	0.88096	0.8728	0.5722	0.55505	0.75556	0.72319	0.50323	0.48447
89.2	0.01259	0	0.06737	0.05848	0.88213	0.87351	0.57234	0.55526	0.75573	0.72338	0.50427	0.48465
89.4	0.0126	0	0.0671	0.05848	0.88247	0.87421	0.57239	0.55547	0.7558	0.72357	0.50486	0.48484
89.6	0.01266	0	0.06731	0.05848	0.88273	0.87492	0.57273	0.55568	0.75672	0.72375	0.50494	0.48502
89.8	0.01273	0	0.06784	0.05848	0.88385	0.87562	0.57299	0.55589	0.75681	0.72394	0.50571	0.4852
90	0.01278	0	0.06739	0.05848	0.88468	0.87632	0.57337	0.55609	0.75745	0.72412	0.50611	0.48538
90.2	0.01282	0	0.0677	0.05848	0.88527	0.87702	0.57429	0.5563	0.75869	0.7243	0.50667	0.48555
90.4	0.01289	0	0.06741	0.05848	0.88578	0.87771	0.57527	0.5565	0.7585	0.72448	0.50758	0.48573
90.6	0.01292	0	0.0676	0.05848	0.88708	0.8784	0.57562	0.5567	0.75943	0.72465	0.50794	0.48591
90.8	0.01288	0	0.06741	0.05848	0.888	0.87909	0.57608	0.5569	0.75916	0.72483	0.50857	0.48608
91	0.01284	0	0.06722	0.05848	0.88861	0.87978	0.5758	0.5571	0.75968	0.72501	0.50881	0.48625
91.2	0.01295	0	0.06727	0.05848	0.88954	0.88046	0.57597	0.55729	0.76025	0.72518	0.50884	0.48643
91.4	0.01294	0	0.06757	0.05848	0.8902	0.88114	0.57659	0.55749	0.76067	0.72535	0.5089	0.4866
91.6	0.01296	0	0.06819	0.05848	0.89049	0.88182	0.57688	0.55768	0.76111	0.72552	0.50906	0.48677
91.8	0.01296	0	0.06876	0.05848	0.89104	0.88249	0.57689	0.55788	0.76208	0.72569	0.50934	0.48694
92	0.01299	0	0.06886	0.05848	0.891	0.88316	0.57771	0.55807	0.76299	0.72586	0.50957	0.4871
92.2	0.01301	0	0.06901	0.05848	0.89164	0.88383	0.57828	0.55826	0.76399	0.72603	0.50943	0.48727
92.4	0.01299	0	0.06971	0.05848	0.89233	0.8845	0.57852	0.55845	0.76452	0.7262	0.50959	0.48744
92.6	0.01304	0	0.0696	0.05848	0.89344	0.88516	0.57851	0.55864	0.76495	0.72636	0.51044	0.4876
92.8	0.01308	0	0.07003	0.05848	0.89383	0.88582	0.57883	0.55883	0.76529	0.72652	0.51081	0.48777
93	0.01313	0	0.07003	0.05848	0.89387	0.88648	0.5784	0.55901	0.7654	0.72669	0.511	0.48793
93.2	0.01321	0	0.07051	0.05848	0.89445	0.88714	0.57858	0.5592	0.76636	0.72685	0.51158	0.48809
93.4	0.01322	0	0.07119	0.05848	0.89481	0.88779	0.5791	0.55938	0.7665	0.72701	0.51212	0.48825
93.6	0.0133	0	0.07171	0.05849	0.89605	0.88844	0.5791	0.55956	0.76683	0.72716	0.51273	0.48841
93.8	0.01336	0	0.07142	0.05849	0.89718	0.88909	0.57911	0.55974	0.76702	0.72732	0.51292	0.48857
94	0.01343	0	0.07046	0.05849	0.89802	0.88974	0.5789	0.55992	0.76818	0.72748	0.51363	0.48872
94.2	0.01343	0	0.0711	0.05849	0.89928	0.89038	0.57936	0.5601	0.76894	0.72763	0.51395	0.48888
94.4	0.01348	0	0.07099	0.05849	0.90038	0.89102	0.57932	0.56028	0.76871	0.72779	0.51425	0.48904
94.6	0.01346	0	0.07127	0.05849	0.90179	0.89166	0.57948	0.56046	0.76894	0.72794	0.51459	0.48919
94.8	0.01347	0	0.07004	0.05849	0.90292	0.89229	0.57942	0.56063	0.76916	0.72809	0.51518	0.48934
95	0.0135	0	0.06938	0.05849	0.90407	0.89293	0.57993	0.56081	0.76933	0.72824	0.51549	0.4895
95.2	0.01352	0	0.06929	0.05849	0.90559	0.89356	0.58069	0.56098	0.76951	0.72839	0.51548	0.48965
95.4	0.01345	0	0.06964	0.05849	0.90593	0.89419	0.58177	0.56115	0.76991	0.72854	0.51594	0.4898
95.6	0.01347	0	0.06977	0.05849	0.90607	0.89481	0.5825	0.56132	0.76995	0.72868	0.51625	0.48995
95.8	0.01349	0	0.06931	0.05849	0.90629	0.89543	0.58249	0.56149	0.77099	0.72883	0.51609	0.4901
96	0.01349	0	0.06884	0.05849	0.90644	0.89606	0.58309	0.56166	0.77176	0.72897	0.51636	0.49024
96.2	0.01349	0	0.06931	0.05849	0.9072	0.89667	0.58409	0.56183	0.77206	0.72912	0.51597	0.49039
96.4	0.01346	0	0.07017	0.05849	0.90732	0.89729	0.58441	0.562	0.77202	0.72926	0.5163	0.49054
96.6	0.01348	0	0.0694	0.05849	0.90803	0.8979	0.58522	0.56216	0.77216	0.7294	0.51644	0.49068
96.8	0.01353	0	0.06916	0.05849	0.90827	0.89851	0.58634	0.56233	0.77262	0.72954	0.5162	0.49082
97	0.01353	0	0.06924	0.05849	0.90903	0.89912	0.58634	0.56249	0.77282	0.72968	0.51647	0.49097
97.2	0.01352	0	0.06921	0.05849	0.90988	0.89973	0.587	0.56265	0.77353	0.72982	0.51646	0.49111
97.4	0.01352	0	0.06976	0.05849	0.91153	0.90033	0.58756	0.56281	0.7738	0.72996	0.51666	0.49125
97.6	0.01357	0	0.06951	0.05849	0.91268	0.90093	0.58779	0.56297	0.77476	0.73009	0.51674	0.49139
97.8	0.01357	0	0.06904	0.05849	0.91328	0.90153	0.58808	0.56313	0.77554	0.73023	0.51773	0.49153
98	0.01356	0	0.06916	0.05849	0.91425	0.90213	0.58854	0.56329	0.77596	0.73036	0.51809	0.49167
98.2	0.01349	0	0.06977	0.05849	0.91512	0.90272	0.58886	0.56345	0.77619	0.73049	0.51874	0.4918
98.4	0.01348	0	0.06987	0.05849	0.91574	0.90331	0.58899	0.5636	0.77642	0.73063	0.51955	0.49194
98.6	0.01351	0	0.07	0.05849	0.91665	0.9039	0.58933	0.56376	0.77678	0.73076	0.52077	0.49208
98.8	0.01356	0	0.0693	0.05849	0.91749	0.90449	0.58955	0.56391	0.77773	0.73089	0.52133	0.49221
99	0.01355	0	0.0695	0.05849	0.91792	0.90507	0.5895	0.56406	0.77842	0.73101	0.52172	0.49235
99.2	0.01354	0	0.07022	0.05849	0.91823	0.90566	0.58986	0.56422	0.77883	0.73114	0.52249	0.49248
99.4	0.01353	0	0.07075	0.05849	0.91779	0.90624	0.59051	0.56437	0.78008	0.73127	0.52299	0.49261
99.6	0.01359	0	0.07084	0.05849	0.91814	0.90681	0.59056	0.56452	0.78045	0.7314	0.52367	0.49274
99.8	0.01365	0	0.07032	0.05849	0.91796	0.90739	0.59007	0.56467	0.78074	0.73152	0.52359	0.49287
100	0.01369	0	0.0706	0.05849	0.91805	0.90796	0.59082	0.56481	0.78134	0.73164	0.52478	0.493
100.2	0.01377	0	0.07082	0.05849	0.91822	0.90853	0.59166	0.56496	0.78201	0.73177	0.52473	0.49313
100.4	0.01384	0	0.07046	0.05849	0.91853	0.9091	0.59183	0.56511	0.78248	0.73189	0.52482	0.49326
100.6	0.01394	0	0.06975	0.05849	0.91929	0.90967	0.5922	0.56525	0.7824	0.73201	0.52478	0.49339
100.8	0.014	0	0.06959	0.05849	0.91972	0.91023	0.59296	0.5654	0.78328	0.73213	0.52477	0.49351
101	0.01403	0	0.06907	0.05849	0.92036	0.91079	0.59294	0.56554	0.78338	0.73225	0.52452	0.49364
101.2	0.01407	0	0.06928	0.05849	0.92139	0.91135	0.59353	0.56568	0.78377	0.73237	0.52433	0.49376
101.4	0.01408	0	0.0695	0.05849	0.92276	0.91191	0.59375	0.56582	0.78422	0.73249	0.52498	0.49389
101.6	0.01408	0	0.06915	0.05849	0.92348	0.91246	0.59399	0.56596	0.78369	0.7326	0.52573	0.49401
101.8	0.01409	0	0.06942	0.05849	0.92452	0.91302	0.59446	0.5661	0.78328	0.73272	0.52739	0.49413
102	0.01411	0	0.06986	0.05849	0.92513	0.91357	0.59481	0.56624	0.78328	0.73283	0.527	0.49425
102.2	0.01408	0	0.06979	0.05849	0.92571	0.91412	0.59525	0.56638	0.78364	0.73295	0.5276	0.49437
102.4	0.01408	0	0.07026	0.05849	0.92605	0.91466	0.59565	0.56652	0.78386	0.73306	0.52807	0.49449
102.6	0.0141	0	0.07057	0.05849	0.92643	0.91521	0.59623	0.56665	0.78386	0.73317	0.52808	0.49461
102.8	0.01414	0	0.07062	0.05849	0.92655	0.91575	0.5962	0.56679	0.78417	0.73328	0.52813	0.49473
103	0.01412	0	0.07154	0.05849	0.92644	0.91629	0.59656	0.56692	0.7843	0.73339	0.52862	0.49485
103.2	0.01416	0	0.07218	0.05849	0.92682	0.91683	0.59717	0.56706	0.7849	0.7335	0.52954	0.49497
103.4	0.01415	0	0.07292	0.05849	0.92746	0.91736	0.59707	0.56719	0.7858	0.73361	0.52969	0.49508
103.6	0.01417	0	0.07342	0.05849	0.92792	0.9179	0.59744	0.56732	0.78585	0.73372	0.53008	0.4952
103.8	0.01426	0	0.07312	0.05849	0.92818	0.91843	0.59733	0.56745	0.78647	0.73383	0.52991	0.49531
104	0.01427	0	0.07353	0.05849	0.92909	0.91896	0.59735	0.56758	0.7879	0.73393	0.53059	0.49543
104.2	0.01432	0	0.0726	0.05849	0.92971	0.91948	0.59759	0.56771	0.78856	0.73404	0.53031	0.49554
104.4	0.0143	0	0.07278	0.05849	0.93067	0.92001	0.59781	0.56784	0.78825	0.73414	0.53071	0.49565
104.6	0.01429	0	0.07238	0.05849	0.93157	0.92053	0.59804	0.56797	0.78838	0.73425	0.53055	0.49576
104.8	0.01424	0	0.0717	0.05849	0.93263	0.92105	0.59872	0.56809	0.78868	0.73435	0.53087	0.49587
105	0.01427	0	0.07152	0.05849	0.93377	0.92157	0.59901	0.56822	0.7887	0.73445	0.53081	0.49598
105.2	0.01427	0	0.07174	0.05849	0.93524	0.92209	0.59947	0.56834	0.78907	0.73455	0.53132	0.49609
105.4	0.01429	0	0.07098	0.05849	0.93614	0.9226	0.59945	0.56847	0.78916	0.73466	0.53201	0.4962
105.6	0.01434	0	0.07086	0.05849	0.93663	0.92311	0.59972	0.56859	0.78897	0.73476	0.53287	0.49631
105.8	0.01435	0	0.07105	0.05849	0.93686	0.92362	0.60075	0.56872	0.78887	0.73485	0.53372	0.49642
106	0.01435	0	0.0706	0.05849	0.93702	0.92413	0.60111	0.56884	0.78918	0.73495	0.53386	0.49653
106.2	0.01431	0	0.07063	0.05849	0.93763	0.92464	0.60197	0.56896	0.78876	0.73505	0.5347	0.49663
106.4	0.01434	0	0.07116	0.05849	0.93768	0.92514	0.60237	0.56908	0.78861	0.73515	0.53517	0.49674
106.6	0.01439	0	0.07146	0.05849	0.93794	0.92565	0.60301	0.5692	0.78829	0.73524	0.53555	0.49684
106.8	0.01449	0	0.07151	0.05849	0.93801	0.92615	0.60283	0.56932	0.78862	0.73534	0.53626	0.49695
107	0.01448	0	0.07251	0.05849	0.93842	0.92665	0.60334	0.56943	0.7896	0.73543	0.53677	0.49705
107.2	0.01455	0	0.07304	0.05849	0.93914	0.92714	0.60339	0.56955	0.79009	0.73553	0.53675	0.49715
107.4	0.01461	0	0.07359	0.05849	0.93948	0.92764	0.60336	0.56967	0.79049	0.73562	0.53665	0.49725
107.6	0.01461	0	0.07391	0.05849	0.93982	0.92813	0.60331	0.56978	0.79106	0.73571	0.53674	0.49735
107.8	0.01468	0	0.07378	0.05849	0.94037	0.92862	0.60279	0.5699	0.79192	0.73581	0.53706	0.49746
108	0.01462	0	0.07332	0.05849	0.94095	0.92911	0.60263	0.57001	0.79272	0.7359	0.53762	0.49756
108.2	0.01466	0	0.07327	0.05849	0.94146	0.9296	0.60337	0.57013	0.79313	0.73599	0.53758	0.49765
108.4	0.01464	0	0.07382	0.05849	0.9422	0.93008	0.6038	0.57024	0.79361	0.73608	0.53774	0.49775
108.6	0.01462	0	0.07329	0.05849	0.94316	0.93056	0.60376	0.57035	0.7946	0.73617	0.53723	0.49785
108.8	0.01464	0	0.07344	0.05849	0.94424	0.93104	0.60418	0.57046	0.7948	0.73625	0.53755	0.49795
109	0.01471	0	0.07366	0.05849	0.94467	0.93152	0.60452	0.57057	0.79573	0.73634	0.53719	0.49805
109.2	0.01478	0	0.0729	0.05849	0.9454	0.932	0.60462	0.57068	0.79651	0.73643	0.53752	0.49814
109.4	0.01489	0	0.07264	0.05849	0.94563	0.93248	0.60484	0.57079	0.79693	0.73652	0.53824	0.49824
109.6	0.01489	0	0.0727	0.05849	0.94578	0.93295	0.6056	0.5709	0.7974	0.7366	0.53902	0.49833
109.8	0.01486	0	0.07276	0.05849	0.94658	0.93342	0.60625	0.57101	0.79768	0.73669	0.53936	0.49843
110	0.01486	0	0.07254	0.05849	0.94701	0.93389	0.60656	0.57111	0.79851	0.73677	0.53917	0.49852
110.2	0.01489	0	0.07281	0.05849	0.94781	0.93436	0.60673	0.57122	0.79844	0.73685	0.54003	0.49861
110.4	0.01497	0	0.07219	0.05849	0.949	0.93482	0.60706	0.57133	0.79858	0.73694	0.54055	0.49871
110.6	0.01503	0	0.0723	0.05849	0.95026	0.93529	0.6075	0.57143	0.79935	0.73702	0.54088	0.4988
110.8	0.01507	0	0.07259	0.05849	0.95097	0.93575	0.60718	0.57153	0.80023	0.7371	0.54114	0.49889
111	0.01508	0	0.07287	0.05849	0.95172	0.93621	0.60743	0.57164	0.80071	0.73718	0.54138	0.49898
111.2	0.01512	0	0.07291	0.05849	0.95151	0.93667	0.60772	0.57174	0.80084	0.73726	0.5418	0.49907
111.4	0.01516	0	0.07299	0.05849	0.95204	0.93713	0.60777	0.57184	0.80155	0.73734	0.54253	0.49916
111.6	0.01513	0	0.07331	0.05849	0.95255	0.93758	0.60807	0.57194	0.80194	0.73742	0.54322	0.49925
111.8	0.01518	0	0.07321	0.05849	0.95282	0.93803	0.60852	0.57205	0.80224	0.7375	0.54379	0.49934
112	0.01511	0	0.07285	0.05849	0.95279	0.93849	0.60886	0.57215	0.80224	0.73758	0.54423	0.49943
112.2	0.01511	0	0.07343	0.05849	0.95312	0.93893	0.6089	0.57225	0.80207	0.73766	0.54399	0.49951
112.4	0.0151	0	0.07379	0.05849	0.95332	0.93938	0.60917	0.57234	0.80196	0.73774	0.54391	0.4996
112.6	0.01511	0	0.07388	0.05849	0.95375	0.93983	0.6091	0.57244	0.80186	0.73781	0.54402	0.49969
112.8	0.01514	0	0.07449	0.05849	0.95375	0.94027	0.60952	0.57254	0.80166	0.73789	0.54403	0.49977
113	0.01519	0	0.07449	0.05849	0.954	0.94071	0.60993	0.57264	0.80189	0.73796	0.54366	0.49986
113.2	0.01523	0	0.07381	0.05849	0.95375	0.94116	0.6104	0.57273	0.80241	0.73804	0.54388	0.49994
113.4	0.01526	0	0.07373	0.05849	0.95375	0.94159	0.61083	0.57283	0.803	0.73811	0.5442	0.50003
113.6	0.01526	0	0.07373	0.05849	0.95402	0.94203	0.61067	0.57292	0.80324	0.73819	0.54411	0.50011
113.8	0.01524	0	0.07367	0.05849	0.95453	0.94247	0.61032	0.57302	0.80338	0.73826	0.54356	0.50019
114	0.01526	0	0.07337	0.05849	0.9552	0.9429	0.61051	0.57311	0.80347	0.73833	0.54345	0.50028
114.2	0.01528	0	0.07342	0.05849	0.95673	0.94333	0.61008	0.57321	0.80333	0.7384	0.54416	0.50036
114.4	0.01532	0	0.07333	0.05849	0.95826	0.94376	0.61035	0.5733	0.80435	0.73847	0.54427	0.50044
114.6	0.01534	0	0.07343	0.05849	0.95887	0.94419	0.6103	0.57339	0.80558	0.73854	0.54394	0.50052
114.8	0.01537	0	0.07349	0.05849	0.95922	0.94462	0.61025	0.57348	0.80581	0.73861	0.54425	0.5006
115	0.01545	0	0.0735	0.05849	0.95983	0.94504	0.61115	0.57357	0.80612	0.73868	0.54457	0.50068
115.2	0.01551	0	0.07337	0.05849	0.96051	0.94547	0.61129	0.57366	0.80708	0.73875	0.54522	0.50076
115.4	0.01552	0	0.07282	0.05849	0.96129	0.94589	0.61209	0.57375	0.80724	0.73882	0.54559	0.50084
115.6	0.0155	0	0.07234	0.05849	0.96207	0.94631	0.61282	0.57384	0.80794	0.73889	0.54597	0.50092
115.8	0.01548	0	0.07264	0.05849	0.96251	0.94673	0.61357	0.57393	0.80811	0.73896	0.54651	0.50099
116	0.01545	0	0.0722	0.05849	0.96278	0.94714	0.61348	0.57402	0.80772	0.73902	0.54715	0.50107
116.2	0.01552	0	0.07254	0.05849	0.96329	0.94756	0.61412	0.57411	0.80821	0.73909	0.54706	0.50115
116.4	0.01555	0	0.07256	0.05849	0.96378	0.94797	0.61492	0.57419	0.80889	0.73916	0.5471	0.50122
116.6	0.01555	0	0.07221	0.05849	0.96403	0.94838	0.61524	0.57428	0.80939	0.73922	0.54753	0.5013
116.8	0.0155	0	0.07202	0.05849	0.96412	0.94879	0.61552	0.57437	0.80929	0.73929	0.54746	0.50138
117	0.01554	0	0.07199	0.05849	0.96406	0.9492	0.61597	0.57445	0.80975	0.73935	0.54783	0.50145
117.2	0.01552	0	0.07103	0.05849	0.96451	0.94961	0.61578	0.57453	0.81026	0.73942	0.54818	0.50152
117.4	0.01557	0	0.07085	0.05849	0.96524	0.95001	0.61541	0.57462	0.81033	0.73948	0.54851	0.5016
117.6	0.01558	0	0.07142	0.05849	0.96589	0.95042	0.61504	0.5747	0.81037	0.73954	0.54868	0.50167
117.8	0.01555	0	0.07176	0.05849	0.96644	0.95082	0.61484	0.57479	0.81064	0.73961	0.54873	0.50174
118	0.01554	0	0.07211	0.05849	0.96721	0.95122	0.6148	0.57487	0.81097	0.73967	0.54926	0.50182
118.2	0.01553	0	0.07272	0.05849	0.96784	0.95162	0.61457	0.57495	0.81116	0.73973	0.54969	0.50189
118.4	0.01553	0	0.07303	0.05849	0.96828	0.95202	0.6148	0.57503	0.81177	0.73979	0.55012	0.50196
118.6	0.01552	0	0.07302	0.05849	0.96862	0.95241	0.61509	0.57511	0.81147	0.73985	0.5503	0.50203
118.8	0.01553	0	0.07342	0.05849	0.9692	0.95281	0.61549	0.57519	0.81122	0.73991	0.55078	0.5021
119	0.01555	0	0.07355	0.05849	0.96971	0.9532	0.61602	0.57527	0.81139	0.73997	0.55124	0.50217
119.2	0.01551	0	0.07313	0.05849	0.97009	0.95359	0.61616	0.57535	0.8114	0.74003	0.5517	0.50224
119.4	0.01546	0	0.07286	0.05849	0.96999	0.95398	0.61708	0.57543	0.81096	0.74009	0.55198	0.50231
119.6	0.01542	0	0.07297	0.05849	0.97043	0.95437	0.61761	0.57551	0.81121	0.74015	0.50088	0.50238
119.8	0.01631	0	0.07327	0.05849	0.97048	0.95475	0.61813	0.57559	0.81076	0.74021	0.49619	0.49917
119.99	0.01628	0	0.04141	0.05849	0.93365	0.95515	0.56094	0.57567	0.71712	0.74026	0.49045	0.49598
120.19	0.01625	0	0.04119	0.05731	0.93106	0.95213	0.55572	0.57197	0.70642	0.73467	0.48433	0.49281
120.39	0.01626	0	0.04073	0.05615	0.92799	0.94911	0.55015	0.5683	0.69436	0.72911	0.47724	0.48966
120.59	0.01627	0	0.03959	0.05501	0.92423	0.9461	0.54404	0.56465	0.6817	0.7236	0.47007	0.48653
120.79	0.01625	0	0.03877	0.0539	0.9203	0.94311	0.53678	0.56102	0.66829	0.71813	0.46249	0.48342
120.99	0.01623	0	0.0376	0.05281	0.91596	0.94012	0.52942	0.55742	0.65384	0.71271	0.45515	0.48033
121.19	0.01623	0	0.03656	0.05174	0.91132	0.93714	0.52183	0.55384	0.63926	0.70732	0.4478	0.47726
121.39	0.01621	0	0.03524	0.05069	0.90608	0.93417	0.51379	0.55028	0.62466	0.70197	0.4415	0.47421
121.59	0.01622	0	0.03372	0.04967	0.9014	0.93122	0.50642	0.54675	0.61068	0.69667	0.43557	0.47118
121.79	0.01625	0	0.03222	0.04866	0.89666	0.92827	0.49946	0.54324	0.59761	0.6914	0.43134	0.46817
121.99	0.01626	0	0.03064	0.04768	0.89195	0.92533	0.49317	0.53975	0.58578	0.68618	0.42721	0.46518
122.19	0.01627	0	0.02945	0.04671	0.88753	0.92239	0.48755	0.53628	0.57624	0.68099	0.42299	0.4622
122.39	0.0162	0	0.02827	0.04577	0.88343	0.91947	0.48207	0.53284	0.56739	0.67584	0.42016	0.45925
122.59	0.01621	0	0.02763	0.04484	0.88001	0.91656	0.47747	0.52942	0.55886	0.67074	0.41748	0.45632
122.79	0.01618	0	0.02639	0.04394	0.87658	0.91366	0.47346	0.52602	0.55086	0.66567	0.41465	0.4534
122.99	0.01617	0	0.02556	0.04305	0.87325	0.91076	0.46937	0.52264	0.5442	0.66064	0.4122	0.4505
123.19	0.01615	0	0.02477	0.04218	0.87087	0.90788	0.46577	0.51928	0.53716	0.65564	0.40945	0.44762
123.39	0.01618	0	0.02388	0.04132	0.86844	0.905	0.46252	0.51595	0.53092	0.65069	0.40669	0.44476
123.59	0.01617	0	0.02315	0.04049	0.8658	0.90214	0.45963	0.51264	0.52447	0.64577	0.40379	0.44192
123.79	0.01612	0	0.02294	0.03967	0.86308	0.89928	0.45615	0.50934	0.51878	0.64089	0.40129	0.4391
123.99	0.0161	0	0.02271	0.03887	0.86014	0.89643	0.45258	0.50607	0.51357	0.63605	0.39861	0.43629
124.19	0.01611	0	0.02224	0.03808	0.85805	0.89359	0.44995	0.50282	0.50863	0.63124	0.39613	0.4335
124.39	0.01615	0	0.02203	0.03731	0.85608	0.89076	0.44762	0.49959	0.50461	0.62647	0.3939	0.43073
124.59	0.01615	0	0.02082	0.03655	0.85385	0.88794	0.44536	0.49639	0.5008	0.62173	0.39151	0.42798
124.79	0.01617	0	0.02063	0.03581	0.85174	0.88513	0.4426	0.4932	0.49733	0.61703	0.38907	0.42524
124.99	0.01618	0	0.01976	0.03509	0.84895	0.88233	0.44061	0.49003	0.49369	0.61237	0.38696	0.42253
125.19	0.01619	0	0.01964	0.03438	0.84633	0.87953	0.439	0.48688	0.49077	0.60774	0.38457	0.41983
125.39	0.0162	0	0.0191	0.03368	0.84402	0.87675	0.43661	0.48376	0.48804	0.60315	0.38278	0.41714
125.59	0.01624	0	0.01895	0.033	0.84168	0.87397	0.4352	0.48065	0.48535	0.59859	0.38095	0.41448
125.79	0.01629	0	0.0184	0.03234	0.83942	0.8712	0.43371	0.47757	0.48221	0.59407	0.37993	0.41183
125.99	0.01625	0	0.01805	0.03168	0.83699	0.86844	0.43124	0.4745	0.47892	0.58958	0.37863	0.4092
126.19	0.01621	0	0.01808	0.03104	0.83463	0.86569	0.42937	0.47145	0.47682	0.58512	0.37737	0.40658
126.39	0.01619	0	0.01794	0.03041	0.83233	0.86295	0.4279	0.46842	0.47417	0.5807	0.37715	0.40398
126.59	0.01619	0	0.0184	0.0298	0.83044	0.86021	0.42636	0.46542	0.47181	0.57631	0.37598	0.4014
126.79	0.01618	0	0.01822	0.02919	0.82852	0.85749	0.42475	0.46243	0.46944	0.57195	0.37494	0.39884
126.99	0.01621	0	0.01835	0.0286	0.82635	0.85477	0.42205	0.45946	0.46716	0.56763	0.37365	0.39629
127.19	0.01623	0	0.01721	0.02803	0.82423	0.85207	0.4206	0.45651	0.46387	0.56334	0.37172	0.39376
127.39	0.0162	0	0.0172	0.02746	0.82188	0.84937	0.41841	0.45358	0.4613	0.55908	0.36992	0.39124
127.59	0.01614	0	0.01734	0.0269	0.81942	0.84668	0.41684	0.45066	0.45839	0.55486	0.36831	0.38874
127.79	0.01609	0	0.017	0.02636	0.81692	0.844	0.41505	0.44777	0.45542	0.55067	0.36685	0.38626
127.99	0.01607	0	0.01642	0.02583	0.81457	0.84132	0.41251	0.44489	0.45284	0.5465	0.36538	0.38379
128.19	0.01609	0	0.0161	0.0253	0.81261	0.83866	0.41062	0.44204	0.4504	0.54237	0.36388	0.38134
128.39	0.01611	0	0.01565	0.02479	0.81041	0.836	0.40912	0.4392	0.44783	0.53827	0.36287	0.3789
128.59	0.01609	0	0.01433	0.02429	0.80802	0.83335	0.40713	0.43638	0.44528	0.53421	0.36125	0.37648
128.79	0.01608	0	0.01423	0.0238	0.80535	0.83071	0.40497	0.43358	0.44345	0.53017	0.35967	0.37407
128.99	0.01603	0	0.01319	0.02332	0.8023	0.82808	0.40357	0.43079	0.44107	0.52616	0.35807	0.37168
129.19	0.01601	0	0.013	0.02285	0.79996	0.82546	0.40163	0.42803	0.43956	0.52218	0.35633	0.36931
129.39	0.01605	0	0.01222	0.02238	0.79772	0.82285	0.39927	0.42528	0.43702	0.51824	0.35458	0.36695
129.59	0.01608	0	0.01186	0.02193	0.79517	0.82024	0.39808	0.42255	0.43505	0.51432	0.35261	0.3646
129.79	0.01613	0	0.01129	0.02149	0.79329	0.81764	0.39652	0.41983	0.43279	0.51043	0.3509	0.36227
129.99	0.0161	0	0.01133	0.02105	0.79042	0.81505	0.39468	0.41714	0.43092	0.50658	0.34956	0.35996
130.19	0.01609	0	0.01129	0.02063	0.7881	0.81247	0.39393	0.41446	0.42897	0.50275	0.34822	0.35766
130.39	0.0161	0	0.01166	0.02021	0.78567	0.8099	0.39252	0.4118	0.42688	0.49895	0.34743	0.35537
130.59	0.01615	0	0.01203	0.0198	0.78375	0.80733	0.39096	0.40915	0.42539	0.49518	0.3458	0.3531
130.79	0.01615	0	0.01203	0.0194	0.78178	0.80478	0.38913	0.40652	0.42324	0.49143	0.34483	0.35084
130.99	0.01618	0	0.01194	0.01901	0.77964	0.80223	0.38705	0.40391	0.42096	0.48772	0.3435	0.3486
131.19	0.01615	0	0.01131	0.01862	0.77724	0.79969	0.38549	0.40132	0.41895	0.48403	0.34203	0.34637
131.39	0.0161	0	0.01168	0.01825	0.7753	0.79715	0.38346	0.39874	0.41723	0.48038	0.34075	0.34416
131.59	0.01607	0	0.01141	0.01788	0.77294	0.79463	0.38221	0.39618	0.41504	0.47675	0.33937	0.34196
131.79	0.01603	0	0.01061	0.01752	0.77135	0.79211	0.38129	0.39364	0.41285	0.47314	0.33757	0.33977
131.99	0.016	0	0.01082	0.01716	0.76932	0.7896	0.37966	0.39111	0.41133	0.46957	0.33578	0.3376
132.19	0.01597	0	0.01082	0.01681	0.76716	0.7871	0.37819	0.3886	0.40951	0.46602	0.33428	0.33545
132.39	0.01598	0	0.01043	0.01647	0.76544	0.78461	0.37711	0.3861	0.40835	0.4625	0.33264	0.3333
132.59	0.01591	0	0.01021	0.01614	0.76339	0.78212	0.37535	0.38362	0.40706	0.459	0.33116	0.33117
132.79	0.01585	0	0.01031	0.01581	0.76139	0.77965	0.37396	0.38116	0.40554	0.45553	0.32952	0.32906
132.99	0.01584	0	0.00986	0.01549	0.75934	0.77718	0.37225	0.37871	0.40382	0.45209	0.32856	0.32695
133.19	0.0159	0	0.00971	0.01518	0.75747	0.77472	0.37082	0.37628	0.40258	0.44867	0.32694	0.32486
133.39	0.01593	0	0.00941	0.01487	0.75568	0.77226	0.36938	0.37386	0.4009	0.44528	0.32539	0.32279
133.59	0.01595	0	0.00944	0.01457	0.75351	0.76982	0.36815	0.37146	0.4006	0.44192	0.32403	0.32072
133.79	0.01599	0	0.00903	0.01428	0.75128	0.76738	0.36679	0.36908	0.39899	0.43858	0.32353	0.31867
133.99	0.01602	0	0.00911	0.01399	0.74889	0.76495	0.36559	0.36671	0.3976	0.43526	0.32258	0.31664
134.19	0.01601	0	0.00929	0.01371	0.74689	0.76252	0.36386	0.36435	0.39602	0.43197	0.32161	0.31462
134.39	0.01609	0	0.00933	0.01343	0.74466	0.76011	0.362	0.36201	0.3951	0.42871	0.32071	0.3126
134.59	0.01615	0	0.00903	0.01316	0.74252	0.7577	0.35996	0.35969	0.39324	0.42547	0.31993	0.31061
134.79	0.01617	0	0.0089	0.01289	0.74043	0.7553	0.35762	0.35738	0.39069	0.42225	0.31909	0.30862
134.99	0.01618	0	0.0083	0.01263	0.73797	0.75291	0.3556	0.35508	0.38832	0.41906	0.318	0.30665
135.19	0.01615	0	0.0076	0.01237	0.73523	0.75052	0.35342	0.3528	0.3867	0.41589	0.31623	0.30469
135.39	0.01614	0	0.00727	0.01212	0.73294	0.74815	0.35221	0.35054	0.3844	0.41275	0.31476	0.30274
135.59	0.01612	0	0.00632	0.01188	0.73063	0.74578	0.35105	0.34829	0.38258	0.40963	0.31296	0.30081
135.79	0.01614	0	0.00576	0.01164	0.72901	0.74342	0.35003	0.34605	0.38028	0.40653	0.3109	0.29889
135.99	0.01612	0	0.00547	0.0114	0.72643	0.74106	0.34814	0.34383	0.37808	0.40346	0.30874	0.29698
136.19	0.01613	0	0.00488	0.01117	0.72412	0.73871	0.34655	0.34162	0.37553	0.40041	0.30712	0.29508
136.39	0.01617	0	0.0045	0.01095	0.72236	0.73637	0.34523	0.33943	0.3743	0.39739	0.30564	0.29319
136.59	0.01614	0	0.00469	0.01073	0.71974	0.73404	0.34352	0.33725	0.37161	0.39438	0.30384	0.29132
136.79	0.01612	0	0.00493	0.01051	0.71773	0.73172	0.34167	0.33508	0.36989	0.3914	0.30214	0.28946
136.99	0.01612	0	0.00509	0.0103	0.71537	0.7294	0.3404	0.33293	0.36819	0.38844	0.30065	0.28761
137.19	0.01614	0	0.00461	0.01009	0.71275	0.72709	0.3394	0.33079	0.36666	0.38551	0.29882	0.28577
137.39	0.01611	0	0.00476	0.00988	0.71102	0.72479	0.33773	0.32867	0.3656	0.38259	0.29785	0.28394
137.59	0.01609	0	0.00458	0.00968	0.70843	0.72249	0.33681	0.32656	0.3646	0.3797	0.29652	0.28213
137.79	0.0161	0	0.00417	0.00949	0.70636	0.7202	0.33585	0.32446	0.36256	0.37683	0.29562	0.28033
137.99	0.01609	0	0.00483	0.0093	0.70403	0.71792	0.33475	0.32238	0.36136	0.37398	0.29424	0.27853
138.19	0.01604	0	0.0051	0.00911	0.70218	0.71565	0.33367	0.32031	0.36004	0.37116	0.29296	0.27675
138.39	0.01606	0	0.00489	0.00892	0.7006	0.71338	0.33269	0.31825	0.3585	0.36835	0.29151	0.27499
138.59	0.01605	0	0.00537	0.00874	0.69893	0.71112	0.33168	0.31621	0.35649	0.36557	0.29024	0.27323
138.79	0.01599	0	0.00563	0.00857	0.69699	0.70887	0.33018	0.31418	0.35441	0.36281	0.28839	0.27148
138.99	0.01592	0	0.00601	0.00839	0.69531	0.70662	0.32896	0.31216	0.35294	0.36006	0.28702	0.26975
139.19	0.01586	0	0.00595	0.00822	0.6937	0.70439	0.32802	0.31015	0.35209	0.35734	0.28532	0.26802
139.39	0.01586	0	0.00603	0.00806	0.69166	0.70215	0.32705	0.30816	0.35033	0.35464	0.28443	0.26631
139.59	0.01581	0	0.00579	0.00789	0.68971	0.69993	0.32521	0.30618	0.34838	0.35196	0.28279	0.26461
139.79	0.0158	0	0.006	0.00773	0.68815	0.69771	0.3239	0.30422	0.34579	0.3493	0.28112	0.26292
139.99	0.01576	0	0.00551	0.00758	0.68604	0.6955	0.32173	0.30226	0.34351	0.34666	0.27974	0.26124
140.19	0.01579	0	0.00569	0.00742	0.68399	0.6933	0.32004	0.30032	0.34101	0.34404	0.2786	0.25957
140.39	0.01584	0	0.00571	0.00727	0.68174	0.6911	0.31827	0.29839	0.33948	0.34144	0.2773	0.25791
140.59	0.01585	0	0.00597	0.00713	0.67936	0.68892	0.31616	0.29648	0.3373	0.33886	0.27543	0.25626
140.79	0.01582	0	0.00606	0.00698	0.67693	0.68673	0.31454	0.29457	0.33595	0.3363	0.27426	0.25462
140.99	0.01581	0	0.0058	0.00684	0.67432	0.68456	0.31316	0.29268	0.33442	0.33376	0.2732	0.253
141.19	0.01588	0	0.00553	0.0067	0.67139	0.68239	0.31084	0.2908	0.33309	0.33124	0.27213	0.25138
141.39	0.01591	0	0.00588	0.00657	0.66937	0.68023	0.3089	0.28894	0.33186	0.32873	0.27112	0.24977
141.59	0.01598	0	0.0053	0.00643	0.66684	0.67807	0.30727	0.28708	0.33072	0.32625	0.26955	0.24818
141.79	0.01601	0	0.00465	0.0063	0.66468	0.67593	0.30551	0.28524	0.32939	0.32378	0.26833	0.24659
141.99	0.01606	0	0.00464	0.00618	0.66267	0.67379	0.30431	0.2834	0.32832	0.32133	0.26745	0.24502
142.19	0.01611	0	0.00434	0.00605	0.66067	0.67165	0.30291	0.28159	0.32732	0.31891	0.26553	0.24345
142.39	0.01613	0	0.00423	0.00593	0.65931	0.66952	0.30129	0.27978	0.32592	0.3165	0.26366	0.24189
142.59	0.0161	0	0.00408	0.00581	0.65736	0.6674	0.29949	0.27798	0.32432	0.3141	0.26208	0.24035
142.79	0.01606	0	0.0035	0.00569	0.65546	0.66529	0.29781	0.2762	0.32296	0.31173	0.26068	0.23881
142.99	0.01607	0	0.00356	0.00558	0.65403	0.66318	0.2962	0.27442	0.32159	0.30937	0.25969	0.23729
143.19	0.01603	0	0.00296	0.00546	0.65228	0.66108	0.29453	0.27266	0.32037	0.30704	0.25836	0.23577
143.39	0.01603	0	0.00273	0.00535	0.65028	0.65899	0.29296	0.27091	0.31835	0.30472	0.2569	0.23426
143.59	0.01598	0	0.00239	0.00525	0.64856	0.6569	0.29149	0.26917	0.31638	0.30241	0.25521	0.23277
143.79	0.01597	0	0.00208	0.00514	0.64699	0.65482	0.29022	0.26744	0.31482	0.30013	0.25372	0.23128
143.99	0.01598	0	0.00181	0.00504	0.64506	0.65275	0.28843	0.26572	0.31284	0.29786	0.25217	0.2298
144.19	0.01598	0	0.00199	0.00493	0.64303	0.65068	0.28693	0.26402	0.31059	0.29561	0.25081	0.22833
144.39	0.016	0	0.00199	0.00483	0.6412	0.64862	0.28533	0.26232	0.30903	0.29337	0.24964	0.22687
144.59	0.01597	0	0.00246	0.00474	0.63951	0.64656	0.28356	0.26064	0.30693	0.29116	0.24834	0.22542
144.79	0.01598	0	0.00222	0.00464	0.63775	0.64452	0.28261	0.25896	0.30517	0.28896	0.24727	0.22398
144.99	0.01597	0	0.00243	0.00455	0.63546	0.64247	0.28104	0.2573	0.30338	0.28677	0.24648	0.22255
145.19	0.01598	0	0.00293	0.00445	0.6332	0.64044	0.27928	0.25565	0.30185	0.2846	0.24526	0.22113
145.39	0.01597	0	0.00268	0.00436	0.63171	0.63841	0.2776	0.25401	0.29987	0.28245	0.24385	0.21972
145.59	0.01597	0	0.00263	0.00428	0.62984	0.63639	0.27636	0.25237	0.29799	0.28032	0.24236	0.21831
145.79	0.01598	0	0.00225	0.00419	0.62771	0.63437	0.27512	0.25075	0.29645	0.2782	0.24154	0.21692
145.99	0.01604	0	0.00229	0.0041	0.626	0.63236	0.27442	0.24914	0.29445	0.2761	0.24031	0.21553
146.19	0.01602	0	0.00175	0.00402	0.6241	0.63036	0.27301	0.24754	0.29303	0.27401	0.23878	0.21415
146.39	0.01601	0	0.00143	0.00394	0.62302	0.62837	0.27174	0.24595	0.29093	0.27194	0.23709	0.21278
146.59	0.01604	0	0.000868861	0.00386	0.62071	0.62638	0.27082	0.24438	0.28946	0.26988	0.23583	0.21142
146.79	0.01604	0	0.000391949	0.00378	0.61926	0.62439	0.26929	0.24281	0.28842	0.26784	0.23496	0.21007
146.99	0.01601	0	-0.00019977	0.00371	0.61698	0.62241	0.2673	0.24125	0.2872	0.26582	0.23362	0.20873
147.19	0.016	0	-0.000808757	0.00363	0.61543	0.62044	0.26616	0.2397	0.28577	0.26381	0.23279	0.2074
147.39	0.01601	0	-0.00121	0.00356	0.6134	0.61848	0.26536	0.23816	0.28472	0.26182	0.23122	0.20607
147.59	0.01604	0	-0.00135	0.00349	0.61147	0.61652	0.26392	0.23663	0.28336	0.25984	0.22996	0.20476
147.79	0.01603	0	-0.00175	0.00341	0.60951	0.61457	0.26246	0.23511	0.28238	0.25787	0.22851	0.20345
147.99	0.016	0	-0.00191	0.00335	0.60786	0.61262	0.26109	0.2336	0.28073	0.25593	0.22658	0.20215
148.19	0.01602	0	-0.00178	0.00328	0.60609	0.61068	0.25946	0.2321	0.27978	0.25399	0.22534	0.20085
148.39	0.01599	0	-0.00158	0.00321	0.60455	0.60874	0.25819	0.23061	0.27839	0.25207	0.22411	0.19957
148.59	0.01598	0	-0.00172	0.00315	0.6025	0.60682	0.25729	0.22913	0.27704	0.25017	0.22289	0.1983
148.79	0.0159	0	-0.00195	0.00308	0.60016	0.60489	0.2567	0.22766	0.27537	0.24828	0.22159	0.19703
148.99	0.01583	0	-0.00148	0.00302	0.59752	0.60298	0.25539	0.22619	0.27379	0.2464	0.22046	0.19577
149.19	0.01577	0	-0.0014	0.00296	0.59562	0.60107	0.25399	0.22474	0.27272	0.24454	0.21881	0.19452
149.39	0.01576	0	-0.00142	0.0029	0.59403	0.59916	0.25245	0.2233	0.27062	0.24269	0.21728	0.19328
149.59	0.01583	0	-0.00137	0.00284	0.59232	0.59727	0.25119	0.22187	0.26905	0.24086	0.21569	0.19204
149.79	0.01588	0	-0.00211	0.00278	0.59078	0.59538	0.25022	0.22044	0.26768	0.23903	0.21476	0.19081
149.99	0.01586	0	-0.00209	0.00273	0.58909	0.59349	0.24917	0.21902	0.26566	0.23723	0.21312	0.18959
150.19	0.01586	0	-0.00224	0.00267	0.58734	0.59161	0.24792	0.21762	0.26406	0.23544	0.21189	0.18838
150.39	0.01588	0	-0.00216	0.00262	0.58567	0.58974	0.24655	0.21622	0.26196	0.23366	0.21025	0.18718
150.59	0.01589	0	-0.00313	0.00257	0.58369	0.58787	0.24526	0.21483	0.2607	0.23189	0.20917	0.18598
150.79	0.01588	0	-0.00363	0.00251	0.58193	0.58601	0.24336	0.21345	0.25925	0.23014	0.20818	0.18479
150.99	0.01592	0	-0.00436	0.00246	0.58002	0.58415	0.24228	0.21208	0.25789	0.2284	0.20729	0.18361
151.19	0.01596	0	-0.00473	0.00241	0.5789	0.5823	0.24125	0.21072	0.25622	0.22667	0.20668	0.18244
151.39	0.01599	0	-0.00483	0.00236	0.57728	0.58046	0.24001	0.20937	0.25486	0.22496	0.20536	0.18127
151.59	0.01602	0	-0.0049	0.00232	0.57581	0.57862	0.238	0.20802	0.25302	0.22326	0.20453	0.18012
151.79	0.016	0	-0.00492	0.00227	0.57442	0.57678	0.2369	0.20669	0.25128	0.22157	0.20327	0.17896
151.99	0.01599	0	-0.0044	0.00222	0.57322	0.57496	0.23613	0.20536	0.24958	0.2199	0.20213	0.17782
152.19	0.01601	0	-0.00415	0.00218	0.57155	0.57314	0.23489	0.20404	0.24847	0.21823	0.20097	0.17668
152.39	0.016	0	-0.00388	0.00213	0.56962	0.57132	0.23348	0.20273	0.24619	0.21659	0.19988	0.17555
152.59	0.016	0	-0.00384	0.00209	0.56727	0.56951	0.23242	0.20143	0.24475	0.21495	0.1985	0.17443
152.79	0.01598	0	-0.00359	0.00205	0.56531	0.56771	0.23151	0.20014	0.24288	0.21332	0.19731	0.17332
152.99	0.01605	0	-0.00322	0.00201	0.56373	0.56591	0.22959	0.19885	0.24178	0.21171	0.19599	0.17221
153.19	0.01609	0	-0.00294	0.00197	0.56211	0.56412	0.22838	0.19757	0.24051	0.21011	0.19452	0.17111
153.39	0.01616	0	-0.00279	0.00193	0.56032	0.56233	0.22705	0.1963	0.23907	0.20852	0.19284	0.17002
153.59	0.01625	0	-0.00351	0.00189	0.55832	0.56055	0.2257	0.19504	0.23785	0.20695	0.1911	0.16893
153.79	0.0162	0	-0.00405	0.00185	0.55624	0.55877	0.22424	0.19379	0.23665	0.20538	0.19019	0.16785
153.99	0.01618	0	-0.00471	0.00181	0.55425	0.557	0.22311	0.19255	0.23519	0.20383	0.18856	0.16678
154.19	0.01618	0	-0.00515	0.00178	0.55253	0.55524	0.22161	0.19131	0.23419	0.20229	0.18734	0.16571
154.39	0.01617	0	-0.00622	0.00174	0.55041	0.55348	0.22028	0.19008	0.23306	0.20076	0.18634	0.16465
154.59	0.01616	0	-0.00728	0.0017	0.5483	0.55173	0.21927	0.18886	0.23202	0.19924	0.18544	0.1636
154.79	0.01618	0	-0.00704	0.00167	0.54636	0.54998	0.21781	0.18765	0.23103	0.19774	0.18403	0.16256
154.99	0.0162	0	-0.00714	0.00164	0.54475	0.54824	0.21636	0.18644	0.23006	0.19624	0.18312	0.16152
155.19	0.01614	0	-0.00721	0.0016	0.54289	0.5465	0.21466	0.18525	0.22874	0.19476	0.1822	0.16048
155.39	0.0161	0	-0.00687	0.00157	0.54155	0.54477	0.21358	0.18406	0.2275	0.19329	0.18106	0.15946
155.59	0.01609	0	-0.00705	0.00154	0.5402	0.54305	0.21231	0.18287	0.22586	0.19183	0.17966	0.15844
155.79	0.01602	0	-0.00669	0.00151	0.53891	0.54133	0.21239	0.1817	0.22456	0.19038	0.17808	0.15743
155.99	0.01599	0	-0.00684	0.00148	0.5376	0.53961	0.21177	0.18053	0.22356	0.18894	0.17677	0.15642
156.19	0.01598	0	-0.00703	0.00145	0.53602	0.5379	0.21002	0.17937	0.22185	0.18751	0.17517	0.15542
156.39	0.01594	0	-0.00698	0.00142	0.53424	0.5362	0.20872	0.17822	0.22039	0.18609	0.17446	0.15443
156.59	0.01594	0	-0.00737	0.00139	0.53234	0.5345	0.2078	0.17708	0.21897	0.18469	0.17319	0.15344
156.79	0.0159	0	-0.00744	0.00136	0.53039	0.53281	0.2067	0.17594	0.21719	0.18329	0.1716	0.15246
156.99	0.01599	0	-0.00761	0.00133	0.52854	0.53112	0.20498	0.17481	0.21602	0.18191	0.17018	0.15149
157.19	0.016	0	-0.00832	0.00131	0.52633	0.52944	0.20411	0.17369	0.21507	0.18053	0.16911	0.15052
157.39	0.016	0	-0.00875	0.00128	0.52411	0.52776	0.20263	0.17257	0.2136	0.17917	0.16794	0.14956
157.59	0.01604	0	-0.00972	0.00125	0.5224	0.52609	0.20119	0.17147	0.21219	0.17781	0.16731	0.1486
157.79	0.01601	0	-0.01037	0.00123	0.52065	0.52442	0.19974	0.17036	0.21087	0.17647	0.1669	0.14765
157.99	0.01602	0	-0.0104	0.0012	0.51925	0.52276	0.19843	0.16927	0.20947	0.17514	0.16586	0.14671
158.19	0.01598	0	-0.01047	0.00118	0.51708	0.52111	0.19635	0.16818	0.20782	0.17381	0.16502	0.14577
158.39	0.01598	0	-0.01095	0.00116	0.51542	0.51946	0.19504	0.1671	0.20599	0.1725	0.16413	0.14484
158.59	0.01598	0	-0.01049	0.00113	0.5137	0.51781	0.1935	0.16603	0.20407	0.17119	0.16331	0.14391
158.79	0.016	0	-0.0099	0.00111	0.51267	0.51617	0.19154	0.16496	0.20258	0.1699	0.16205	0.14299
158.99	0.01596	0	-0.00981	0.00109	0.51135	0.51454	0.19027	0.1639	0.20121	0.16862	0.16154	0.14208
159.19	0.01591	0	-0.01011	0.00107	0.51061	0.51291	0.18931	0.16285	0.19976	0.16734	0.16064	0.14117
159.39	0.01592	0	-0.0099	0.00104	0.50998	0.51128	0.18879	0.16181	0.19866	0.16608	0.15915	0.14027
159.59	0.01588	0	-0.01029	0.00102	0.50926	0.50966	0.18802	0.16077	0.19725	0.16482	0.15794	0.13937
159.79	0.01583	0	-0.01071	0.001	0.50801	0.50805	0.18741	0.15973	0.19595	0.16358	0.15635	0.13848
159.99	0.01584	0	-0.01107	0.000981696	0.50682	0.50644	0.18551	0.15871	0.19415	0.16234	0.15529	0.1376
160.19	0.01583	0	-0.01182	0.000961837	0.50605	0.50483	0.18404	0.15769	0.19235	0.16111	0.15436	0.13672
160.39	0.01584	0	-0.01254	0.00094238	0.50446	0.50324	0.18293	0.15668	0.19138	0.1599	0.15315	0.13584
160.59	0.01591	0	-0.01257	0.000923317	0.50289	0.50164	0.1815	0.15567	0.18993	0.15869	0.15193	0.13498
160.79	0.01585	0	-0.01296	0.000904639	0.50146	0.50005	0.18006	0.15467	0.18933	0.15749	0.15062	0.13411
160.99	0.01585	0	-0.0137	0.000886339	0.50004	0.49847	0.17861	0.15368	0.18862	0.1563	0.14995	0.13326
161.19	0.01584	0	-0.0143	0.000868409	0.49841	0.49689	0.17734	0.15269	0.18766	0.15512	0.14906	0.13241
161.39	0.01591	0	-0.01398	0.000850842	0.49706	0.49532	0.17619	0.15171	0.18652	0.15394	0.14823	0.13156
161.59	0.01589	0	-0.0143	0.00083363	0.49589	0.49375	0.17496	0.15074	0.18601	0.15278	0.14721	0.13072
161.79	0.0159	0	-0.01408	0.000816766	0.49386	0.49218	0.17382	0.14977	0.18488	0.15163	0.14552	0.12988
161.99	0.01592	0	-0.01387	0.000800244	0.49247	0.49062	0.17224	0.14881	0.18351	0.15048	0.14428	0.12905
162.19	0.0159	0	-0.01442	0.000784056	0.49012	0.48907	0.17091	0.14785	0.18173	0.14934	0.14298	0.12823
162.39	0.01596	0	-0.01466	0.000768195	0.48861	0.48752	0.17024	0.1469	0.18018	0.14821	0.14232	0.12741
162.59	0.01592	0	-0.01407	0.000752655	0.48673	0.48598	0.1692	0.14596	0.17874	0.14709	0.14127	0.12659
162.79	0.01592	0	-0.01442	0.000737429	0.4857	0.48444	0.16793	0.14502	0.17763	0.14598	0.14044	0.12579
162.99	0.01591	0	-0.01473	0.000722512	0.4838	0.4829	0.1668	0.14409	0.17658	0.14488	0.13935	0.12498
163.19	0.01599	0	-0.01483	0.000707896	0.48252	0.48137	0.16593	0.14316	0.17559	0.14378	0.13818	0.12418
163.39	0.01609	0	-0.01504	0.000693576	0.48122	0.47985	0.16537	0.14225	0.17472	0.1427	0.13701	0.12339
163.59	0.01614	0	-0.01575	0.000679546	0.47969	0.47833	0.16432	0.14133	0.17341	0.14162	0.13653	0.1226
163.79	0.01619	0	-0.01574	0.000665799	0.47759	0.47682	0.16367	0.14042	0.17171	0.14055	0.13515	0.12182
163.99	0.0162	0	-0.01574	0.00065233	0.47595	0.4753	0.16267	0.13952	0.17065	0.13949	0.13455	0.12104
164.19	0.01626	0	-0.01579	0.000639134	0.47493	0.4738	0.1619	0.13863	0.16999	0.13843	0.13393	0.12027
164.39	0.01629	0	-0.01522	0.000626205	0.47301	0.4723	0.16101	0.13774	0.16887	0.13739	0.13283	0.1195
164.59	0.01628	0	-0.01478	0.000613538	0.47166	0.4708	0.16015	0.13685	0.16846	0.13635	0.13187	0.11873
164.79	0.0162	0	-0.01525	0.000601126	0.46983	0.46931	0.15919	0.13597	0.16741	0.13532	0.1312	0.11797
164.99	0.01618	0	-0.01526	0.000588966	0.46806	0.46783	0.15788	0.1351	0.16608	0.13429	0.12965	0.11722
165.19	0.01624	0	-0.0152	0.000577052	0.46688	0.46634	0.15682	0.13423	0.16491	0.13328	0.12878	0.11647
165.39	0.01619	0	-0.01507	0.000565379	0.46544	0.46487	0.15616	0.13337	0.16356	0.13227	0.12821	0.11573
165.59	0.01608	0	-0.01524	0.000553941	0.46404	0.46339	0.15481	0.13251	0.16223	0.13127	0.12707	0.11499
165.79	0.01608	0	-0.01507	0.000542736	0.4628	0.46193	0.15389	0.13166	0.16018	0.13028	0.12568	0.11425
165.99	0.01604	0	-0.01524	0.000531757	0.46148	0.46046	0.15229	0.13082	0.15788	0.1293	0.12496	0.11352
166.19	0.016	0	-0.01532	0.000521	0.45992	0.459	0.1508	0.12998	0.15599	0.12832	0.124	0.1128
166.39	0.016	0	-0.0157	0.00051046	0.45894	0.45755	0.14975	0.12914	0.1542	0.12735	0.12265	0.11208
166.59	0.01595	0	-0.0153	0.000500134	0.45783	0.4561	0.14865	0.12831	0.15289	0.12639	0.12135	0.11136
166.79	0.01598	0	-0.01573	0.000490017	0.45718	0.45466	0.14726	0.12749	0.15189	0.12543	0.12026	0.11065
166.99	0.016	0	-0.01595	0.000480104	0.45567	0.45322	0.14585	0.12667	0.15059	0.12448	0.11894	0.10994
167.19	0.01609	0	-0.01622	0.000470392	0.45503	0.45178	0.14524	0.12586	0.14973	0.12354	0.11762	0.10924
167.39	0.01613	0	-0.01681	0.000460877	0.4537	0.45035	0.14423	0.12505	0.149	0.12261	0.11652	0.10854
167.59	0.01615	0	-0.0174	0.000451554	0.4516	0.44892	0.14324	0.12425	0.1479	0.12168	0.11541	0.10785
167.79	0.01614	0	-0.01695	0.000442419	0.44973	0.4475	0.14314	0.12345	0.14689	0.12076	0.11407	0.10716
167.99	0.01618	0	-0.01731	0.000433469	0.44849	0.44609	0.14221	0.12266	0.14658	0.11985	0.11347	0.10647
168.19	0.01623	0	-0.01702	0.000424701	0.44729	0.44467	0.14105	0.12187	0.14553	0.11894	0.11285	0.10579
168.39	0.01626	0	-0.01728	0.000416109	0.44571	0.44326	0.14048	0.12109	0.14442	0.11804	0.11138	0.10512
168.59	0.01627	0	-0.01796	0.000407692	0.44349	0.44186	0.13933	0.12031	0.14375	0.11715	0.11027	0.10445
168.79	0.01629	0	-0.01801	0.000399444	0.44152	0.44046	0.13868	0.11954	0.14265	0.11627	0.10983	0.10378
168.99	0.01629	0	-0.01791	0.000391364	0.44	0.43907	0.13785	0.11877	0.14167	0.11539	0.10846	0.10311
169.19	0.01631	0	-0.01768	0.000383447	0.43838	0.43767	0.13699	0.11801	0.14062	0.11452	0.10839	0.10246
169.39	0.01619	0	-0.01773	0.00037569	0.43669	0.43629	0.13647	0.11725	0.13931	0.11365	0.10792	0.1018
169.59	0.01614	0	-0.01799	0.00036809	0.43572	0.43491	0.13471	0.11649	0.13841	0.11279	0.10706	0.10115
169.79	0.01611	0	-0.0178	0.000360644	0.43466	0.43353	0.13329	0.11575	0.13736	0.11194	0.10613	0.1005
169.99	0.01611	0	-0.01787	0.000353349	0.43337	0.43216	0.13177	0.115	0.13601	0.11109	0.10577	0.09986
170.19	0.01616	0	-0.0182	0.000346201	0.43247	0.43079	0.13086	0.11426	0.13501	0.11025	0.1049	0.09922
170.39	0.01619	0	-0.01828	0.000339198	0.43155	0.42942	0.13029	0.11353	0.13373	0.10942	0.10388	0.09859
170.59	0.01621	0	-0.01779	0.000332336	0.43075	0.42806	0.12934	0.1128	0.13294	0.10859	0.10318	0.09796
170.79	0.01622	0	-0.0171	0.000325613	0.43006	0.42671	0.12798	0.11208	0.13215	0.10777	0.10195	0.09733
170.99	0.01624	0	-0.01728	0.000319026	0.42904	0.42536	0.12673	0.11136	0.13117	0.10696	0.10005	0.09671
171.19	0.01624	0	-0.01731	0.000312573	0.42825	0.42401	0.12572	0.11064	0.13015	0.10615	0.09856	0.09609
171.39	0.0162	0	-0.01762	0.000306249	0.42669	0.42267	0.12428	0.10993	0.12865	0.10535	0.09736	0.09548
171.59	0.01617	0	-0.0177	0.000300054	0.42535	0.42133	0.12335	0.10923	0.12668	0.10455	0.09617	0.09487
171.79	0.01614	0	-0.01711	0.000293984	0.42431	0.41999	0.12212	0.10852	0.12583	0.10376	0.09506	0.09426
171.99	0.01616	0	-0.01765	0.000288037	0.42325	0.41866	0.12078	0.10783	0.12467	0.10298	0.09399	0.09366
172.19	0.01618	0	-0.01771	0.000282211	0.42195	0.41734	0.11953	0.10714	0.123	0.1022	0.09275	0.09306
172.39	0.01617	0	-0.01779	0.000276502	0.42054	0.41601	0.11847	0.10645	0.12161	0.10143	0.09124	0.09247
172.59	0.01615	0	-0.01819	0.000270908	0.41895	0.4147	0.11694	0.10576	0.12048	0.10066	0.09038	0.09188
172.79	0.01616	0	-0.01791	0.000265428	0.41752	0.41338	0.11665	0.10508	0.11923	0.0999	0.08961	0.09129
172.99	0.01616	0	-0.0183	0.000260059	0.41566	0.41207	0.11575	0.10441	0.11778	0.09914	0.08858	0.09071
173.19	0.01615	0	-0.01843	0.000254798	0.41372	0.41077	0.11439	0.10374	0.1166	0.09839	0.08788	0.09013
173.39	0.01609	0	-0.0187	0.000249644	0.41233	0.40947	0.11344	0.10307	0.11609	0.09765	0.08777	0.08955
173.59	0.01606	0	-0.01941	0.000244594	0.41133	0.40817	0.11238	0.10241	0.11563	0.09691	0.08722	0.08898
173.79	0.01607	0	-0.0194	0.000239646	0.40984	0.40688	0.11169	0.10175	0.11443	0.09618	0.08681	0.08841
173.99	0.01613	0	-0.01997	0.000234798	0.40866	0.40559	0.11095	0.1011	0.11302	0.09545	0.08694	0.08784
174.19	0.01616	0	-0.02082	0.000230048	0.40764	0.4043	0.11028	0.10045	0.11169	0.09473	0.08642	0.08728
174.39	0.0162	0	-0.02066	0.000225394	0.40636	0.40302	0.1098	0.09981	0.11079	0.09402	0.08562	0.08673
174.59	0.01623	0	-0.02038	0.000220835	0.4053	0.40175	0.10883	0.09917	0.10969	0.09331	0.08495	0.08617
174.79	0.01624	0	-0.01996	0.000216368	0.40403	0.40047	0.10828	0.09853	0.10845	0.0926	0.08411	0.08562
174.99	0.01622	0	-0.02093	0.000211991	0.40288	0.39921	0.10748	0.0979	0.10721	0.0919	0.08297	0.08507
175.19	0.0162	0	-0.02097	0.000207702	0.40154	0.39794	0.10662	0.09727	0.10601	0.09121	0.0829	0.08453
175.39	0.0162	0	-0.02105	0.000203501	0.40049	0.39668	0.10521	0.09664	0.10441	0.09052	0.08209	0.08399
175.59	0.01617	0	-0.02149	0.000199384	0.39961	0.39543	0.10406	0.09602	0.10376	0.08983	0.08129	0.08345
175.79	0.01614	0	-0.02144	0.000195351	0.39793	0.39417	0.10275	0.09541	0.10322	0.08915	0.08036	0.08292
175.99	0.0162	0	-0.02148	0.000191399	0.39642	0.39292	0.10161	0.09479	0.10176	0.08848	0.0797	0.08239
176.19	0.01621	0	-0.02127	0.000187527	0.39574	0.39168	0.10025	0.09418	0.10046	0.08781	0.07848	0.08186
176.39	0.01619	0	-0.02113	0.000183734	0.39466	0.39044	0.09897	0.09358	0.09953	0.08715	0.07734	0.08134
176.59	0.01618	0	-0.0212	0.000180017	0.39348	0.3892	0.09754	0.09298	0.09912	0.08649	0.07618	0.08082
176.79	0.01615	0	-0.02117	0.000176375	0.39209	0.38797	0.09719	0.09238	0.09813	0.08584	0.0752	0.0803
176.99	0.01612	0	-0.02099	0.000172807	0.39079	0.38674	0.09622	0.09179	0.09792	0.08519	0.07442	0.07979
177.19	0.01613	0	-0.02079	0.000169312	0.38923	0.38552	0.09521	0.0912	0.0973	0.08454	0.074	0.07928
177.39	0.01612	0	-0.02016	0.000165887	0.38789	0.38429	0.09451	0.09061	0.09713	0.0839	0.07357	0.07877
177.59	0.01609	0	-0.02038	0.000162531	0.3869	0.38308	0.09412	0.09003	0.09681	0.08327	0.0722	0.07827
177.79	0.01608	0	-0.0201	0.000159243	0.3855	0.38186	0.09297	0.08945	0.09593	0.08264	0.07149	0.07777
177.99	0.01607	0	-0.02049	0.000156022	0.3843	0.38065	0.0921	0.08888	0.09533	0.08202	0.07093	0.07727
178.19	0.01609	0	-0.02097	0.000152865	0.38336	0.37945	0.09125	0.08831	0.09446	0.0814	0.0695	0.07678
178.39	0.01612	0	-0.02117	0.000149773	0.3822	0.37825	0.09052	0.08774	0.09365	0.08078	0.0685	0.07629
178.59	0.01607	0	-0.02165	0.000146743	0.3817	0.37705	0.08922	0.08718	0.09181	0.08017	0.06783	0.0758
178.79	0.01611	0	-0.02198	0.000143775	0.38042	0.37586	0.0887	0.08662	0.09065	0.07956	0.06691	0.07532
178.99	0.01611	0	-0.02296	0.000140866	0.3792	0.37466	0.08823	0.08606	0.0895	0.07896	0.06644	0.07484
179.19	0.01612	0	-0.02323	0.000138017	0.37818	0.37348	0.08723	0.08551	0.08818	0.07837	0.06575	0.07436
179.39	0.01611	0	-0.02459	0.000135225	0.37725	0.3723	0.08579	0.08496	0.08683	0.07777	0.06483	0.07388
179.59	0.01607	0	-0.02514	0.000132489	0.37607	0.37112	0.08503	0.08441	0.08539	0.07719	0.06373	0.07341
179.79	0.01609	0	-0.02536	0.000129809	0.37469	0.36994	0.08369	0.08387	0.08401	0.0766	0.06277	0.07294
179.99	0.01615	0	-0.02599	0.000127183	0.37397	0.36877	0.08301	0.08333	0.08262	0.07602	0.06135	0.07247
180.19	0.01617	0	-0.02643	0.000124611	0.37341	0.3676	0.08233	0.0828	0.0812	0.07545	0.06033	0.07201
180.39	0.01617	0	-0.02681	0.00012209	0.37186	0.36644	0.08182	0.08227	0.07998	0.07488	0.05966	0.07155
180.59	0.01612	0	-0.02674	0.00011962	0.37033	0.36528	0.0809	0.08174	0.07935	0.07431	0.05902	0.07109
180.79	0.01614	0	-0.02673	0.0001172	0.36952	0.36412	0.0805	0.08121	0.07807	0.07375	0.05846	0.07064
180.99	0.0162	0	-0.02627	0.000114829	0.36845	0.36297	0.07968	0.08069	0.07737	0.07319	0.05823	0.07019
181.19	0.01625	0	-0.02587	0.000112506	0.36645	0.36182	0.07848	0.08017	0.07638	0.07264	0.05771	0.06974
181.39	0.01625	0	-0.02535	0.000110231	0.36568	0.36067	0.07728	0.07966	0.07588	0.07209	0.05622	0.06929
181.59	0.01627	0	-0.02471	0.000108001	0.36478	0.35953	0.07611	0.07915	0.07557	0.07155	0.05546	0.06885
181.79	0.01629	0	-0.02449	0.000105816	0.36381	0.35839	0.07444	0.07864	0.07487	0.07101	0.05478	0.06841
181.99	0.01634	0	-0.02414	0.000103675	0.36308	0.35725	0.07286	0.07813	0.07382	0.07047	0.05409	0.06797
182.19	0.01639	0	-0.02436	0.000101578	0.36286	0.35612	0.0715	0.07763	0.07236	0.06994	0.05327	0.06754
182.39	0.01639	0	-0.02454	9.95e-05	0.36284	0.35499	0.07023	0.07713	0.07125	0.06941	0.05268	0.06711
182.59	0.01634	0	-0.02463	9.75e-05	0.36223	0.35387	0.06892	0.07664	0.06969	0.06888	0.05208	0.06668
182.79	0.01635	0	-0.02496	9.55e-05	0.36033	0.35275	0.06836	0.07615	0.06853	0.06836	0.05149	0.06625
182.99	0.01628	0	-0.02558	9.36e-05	0.35925	0.35163	0.06688	0.07566	0.06789	0.06785	0.05106	0.06583
183.19	0.01617	0	-0.02599	9.17e-05	0.35852	0.35052	0.06557	0.07517	0.06651	0.06733	0.04998	0.06541
183.39	0.01614	0	-0.02667	8.99e-05	0.35739	0.34941	0.06393	0.07469	0.06589	0.06682	0.04965	0.06499
183.59	0.01618	0	-0.02627	8.8e-05	0.3562	0.3483	0.06371	0.07421	0.06533	0.06632	0.04825	0.06458
183.79	0.0162	0	-0.02651	8.63e-05	0.35479	0.3472	0.06284	0.07373	0.06489	0.06582	0.04704	0.06416
183.99	0.0162	0	-0.02695	8.45e-05	0.35386	0.3461	0.06275	0.07326	0.06356	0.06532	0.04666	0.06375
184.19	0.01624	0	-0.02656	8.28e-05	0.35199	0.345	0.0628	0.07279	0.06281	0.06483	0.04678	0.06335
184.39	0.01619	0	-0.0267	8.11e-05	0.35041	0.34391	0.06238	0.07232	0.06224	0.06434	0.04613	0.06294
184.59	0.01613	0	-0.02695	7.95e-05	0.34909	0.34282	0.06135	0.07186	0.06219	0.06385	0.04468	0.06254
184.79	0.01612	0	-0.02694	7.79e-05	0.34848	0.34173	0.06106	0.0714	0.06144	0.06337	0.04366	0.06214
184.99	0.0161	0	-0.02647	7.63e-05	0.34721	0.34065	0.06005	0.07094	0.06089	0.06289	0.04291	0.06174
185.19	0.01606	0	-0.02601	7.48e-05	0.34559	0.33957	0.05922	0.07048	0.06013	0.06241	0.04155	0.06135
185.39	0.01608	0	-0.02609	7.32e-05	0.34561	0.3385	0.05836	0.07003	0.05925	0.06194	0.03981	0.06096
185.59	0.01611	0	-0.02557	7.18e-05	0.34457	0.33743	0.0573	0.06958	0.05873	0.06147	0.0396	0.06057
185.79	0.01613	0	-0.0258	7.03e-05	0.34385	0.33636	0.05645	0.06913	0.058	0.06101	0.03865	0.06018
185.99	0.01614	0	-0.02616	6.89e-05	0.34326	0.33529	0.05598	0.06869	0.05653	0.06055	0.0377	0.05979
186.19	0.01616	0	-0.02721	6.75e-05	0.34266	0.33423	0.05523	0.06825	0.05581	0.06009	0.03699	0.05941
186.39	0.01613	0	-0.02805	6.61e-05	0.34159	0.33317	0.05434	0.06781	0.05545	0.05964	0.03605	0.05903
186.59	0.01608	0	-0.02856	6.48e-05	0.33988	0.33212	0.05306	0.06737	0.05425	0.05919	0.03542	0.05866
186.79	0.01606	0	-0.02946	6.35e-05	0.33857	0.33106	0.0527	0.06694	0.05334	0.05874	0.03477	0.05828
186.99	0.01602	0	-0.0298	6.22e-05	0.33777	0.33002	0.05163	0.06651	0.05233	0.05829	0.03448	0.05791
187.19	0.01602	0	-0.02996	6.09e-05	0.3365	0.32897	0.05101	0.06608	0.05084	0.05785	0.03357	0.05754
187.39	0.01606	0	-0.0301	5.97e-05	0.33474	0.32793	0.04969	0.06566	0.04998	0.05742	0.03313	0.05717
187.59	0.01608	0	-0.03045	5.85e-05	0.33353	0.32689	0.04933	0.06524	0.04932	0.05698	0.03202	0.0568
187.79	0.01614	0	-0.03103	5.73e-05	0.33211	0.32585	0.04867	0.06482	0.04764	0.05655	0.03131	0.05644
187.99	0.01619	0	-0.03134	5.62e-05	0.33101	0.32482	0.0479	0.0644	0.04631	0.05613	0.03115	0.05608
188.19	0.01623	0	-0.0317	5.5e-05	0.32947	0.32379	0.04738	0.06399	0.04569	0.0557	0.03005	0.05572
188.39	0.01618	0	-0.0322	5.39e-05	0.32821	0.32277	0.0458	0.06358	0.04469	0.05528	0.029	0.05537
188.59	0.01615	0	-0.03222	5.28e-05	0.32714	0.32175	0.04484	0.06317	0.04366	0.05486	0.0276	0.05501
188.79	0.01619	0	-0.03151	5.17e-05	0.32649	0.32073	0.04432	0.06276	0.04247	0.05445	0.02712	0.05466
188.99	0.01623	0	-0.0312	5.07e-05	0.3254	0.31971	0.04316	0.06236	0.04074	0.05404	0.02666	0.05431
189.19	0.01621	0	-0.0314	4.97e-05	0.32456	0.3187	0.04238	0.06196	0.03941	0.05363	0.02555	0.05396
189.39	0.01624	0	-0.03192	4.87e-05	0.32477	0.31769	0.04152	0.06156	0.03815	0.05322	0.02489	0.05362
189.59	0.0162	0	-0.03204	4.77e-05	0.32381	0.31668	0.04052	0.06117	0.03736	0.05282	0.0247	0.05328
189.79	0.01624	0	-0.03283	4.67e-05	0.32272	0.31568	0.03966	0.06077	0.03612	0.05242	0.02387	0.05294
189.99	0.01621	0	-0.03368	4.58e-05	0.32165	0.31468	0.03892	0.06038	0.03533	0.05202	0.02304	0.0526
190.19	0.01619	0	-0.03426	4.49e-05	0.32048	0.31368	0.03803	0.06	0.03554	0.05163	0.02277	0.05226
190.39	0.01618	0	-0.0345	4.39e-05	0.31932	0.31269	0.03761	0.05961	0.03478	0.05124	0.02218	0.05193
190.59	0.01617	0	-0.03397	4.31e-05	0.31845	0.3117	0.03648	0.05923	0.03405	0.05085	0.02165	0.0516
190.79	0.01613	0	-0.03377	4.22e-05	0.31753	0.31071	0.03634	0.05885	0.03373	0.05047	0.02144	0.05127
190.99	0.01615	0	-0.03328	4.13e-05	0.31583	0.30973	0.03544	0.05847	0.03293	0.05009	0.02096	0.05094
191.19	0.01617	0	-0.03359	4.05e-05	0.31461	0.30875	0.03488	0.05809	0.03257	0.04971	0.02037	0.05061
191.39	0.01617	0	-0.03379	3.97e-05	0.31272	0.30777	0.03362	0.05772	0.03207	0.04933	0.02001	0.05029
191.59	0.01617	0	-0.0339	3.89e-05	0.31152	0.30679	0.03339	0.05735	0.03183	0.04896	0.01928	0.04997
191.79	0.01622	0	-0.03409	3.81e-05	0.31019	0.30582	0.0334	0.05698	0.03105	0.04859	0.01788	0.04965
191.99	0.0162	0	-0.03365	3.73e-05	0.30895	0.30485	0.0322	0.05662	0.03013	0.04822	0.01672	0.04933
192.19	0.01617	0	-0.03393	3.66e-05	0.30767	0.30389	0.03146	0.05625	0.02949	0.04786	0.01574	0.04902
192.39	0.01617	0	-0.03374	3.58e-05	0.30619	0.30293	0.03063	0.05589	0.0285	0.0475	0.01504	0.0487
192.59	0.01617	0	-0.03354	3.51e-05	0.30551	0.30197	0.03004	0.05553	0.02753	0.04714	0.0139	0.04839
192.79	0.01619	0	-0.03346	3.44e-05	0.30448	0.30101	0.02918	0.05518	0.02645	0.04678	0.01311	0.04808
192.99	0.01619	0	-0.03388	3.37e-05	0.3035	0.30006	0.0284	0.05482	0.02535	0.04643	0.01266	0.04778
193.19	0.01621	0	-0.03406	3.3e-05	0.30305	0.29911	0.02753	0.05447	0.02403	0.04608	0.01147	0.04747
193.39	0.01621	0	-0.03438	3.23e-05	0.30297	0.29816	0.02634	0.05412	0.02282	0.04573	0.01076	0.04717
193.59	0.01618	0	-0.03432	3.17e-05	0.30158	0.29721	0.02471	0.05377	0.02202	0.04538	0.00952	0.04687
193.79	0.01624	0	-0.03497	3.1e-05	0.3007	0.29627	0.02384	0.05343	0.02083	0.04504	0.00887	0.04657
193.99	0.01622	0	-0.03503	3.04e-05	0.30009	0.29533	0.02322	0.05308	0.02034	0.0447	0.00824	0.04627
194.19	0.01616	0	-0.03504	2.98e-05	0.29944	0.2944	0.02221	0.05274	0.02013	0.04436	0.00761	0.04597
194.39	0.01619	0	-0.03507	2.92e-05	0.29871	0.29347	0.02151	0.0524	0.01917	0.04403	0.0071	0.04568
194.59	0.01618	0	-0.03454	2.86e-05	0.29761	0.29254	0.02046	0.05207	0.01864	0.04369	0.00655	0.04539
194.79	0.01618	0	-0.03469	2.8e-05	0.29618	0.29161	0.0202	0.05173	0.01806	0.04336	0.00632	0.0451
194.99	0.01622	0	-0.03498	2.75e-05	0.29495	0.29069	0.01974	0.0514	0.01712	0.04304	0.00634	0.04481
195.19	0.01619	0	-0.03552	2.69e-05	0.2941	0.28977	0.01928	0.05107	0.01678	0.04271	0.00595	0.04452
195.39	0.01617	0	-0.03528	2.64e-05	0.29282	0.28885	0.01861	0.05074	0.01605	0.04239	0.00509	0.04424
195.59	0.01616	0	-0.03521	2.58e-05	0.29202	0.28793	0.01858	0.05042	0.01498	0.04207	0.00416	0.04396
195.79	0.01617	0	-0.03556	2.53e-05	0.29112	0.28702	0.0182	0.05009	0.01413	0.04175	0.00347	0.04367
195.99	0.01621	0	-0.03517	2.48e-05	0.29021	0.28611	0.01742	0.04977	0.01302	0.04143	0.00299	0.0434
196.19	0.0162	0	-0.03573	2.43e-05	0.28933	0.28521	0.01671	0.04945	0.01207	0.04112	0.00202	0.04312
196.39	0.01622	0	-0.03623	2.38e-05	0.28877	0.2843	0.0165	0.04914	0.01137	0.04081	0.00116	0.04284
196.59	0.01624	0	-0.03631	2.33e-05	0.28812	0.2834	0.01574	0.04882	0.01045	0.0405	0.00031158	0.04257
196.79	0.01626	0	-0.0359	2.29e-05	0.28697	0.2825	0.01529	0.04851	0.00939	0.0402	-0.000658469	0.0423
196.99	0.01627	0	-0.03574	2.24e-05	0.28648	0.28161	0.01455	0.04819	0.0085	0.03989	-0.00102	0.04203
197.19	0.01624	0	-0.03577	2.19e-05	0.28562	0.28072	0.01339	0.04789	0.00674	0.03959	-0.00173	0.04176
197.39	0.01618	0	-0.03666	2.15e-05	0.28502	0.27983	0.01243	0.04758	0.00588	0.03929	-0.00238	0.04149
197.59	0.01623	0	-0.03698	2.11e-05	0.28447	0.27894	0.01179	0.04727	0.00538	0.03899	-0.00319	0.04123
197.79	0.01623	0	-0.03738	2.06e-05	0.28388	0.27806	0.01106	0.04697	0.00468	0.0387	-0.00343	0.04096
197.99	0.01616	0	-0.03763	2.02e-05	0.28297	0.27718	0.01046	0.04667	0.00407	0.03841	-0.004	0.0407
198.19	0.01609	0	-0.03768	1.98e-05	0.28198	0.2763	0.00935	0.04637	0.00354	0.03812	-0.00438	0.04044
198.39	0.01611	0	-0.03774	1.94e-05	0.28138	0.27543	0.0083	0.04607	0.00282	0.03783	-0.00464	0.04018
198.59	0.01608	0	-0.03763	1.9e-05	0.2802	0.27455	0.00754	0.04577	0.00227	0.03754	-0.00532	0.03993
198.79	0.01609	0	-0.03799	1.86e-05	0.27906	0.27368	0.00666	0.04548	0.00175	0.03726	-0.00531	0.03967
198.99	0.01607	0	-0.03829	1.82e-05	0.27831	0.27282	0.00606	0.04519	0.00112	0.03698	-0.0058	0.03942
199.19	0.01609	0	-0.03825	1.79e-05	0.27752	0.27195	0.0053	0.0449	0.000881107	0.0367	-0.00639	0.03917
199.39	0.01608	0	-0.03864	1.75e-05	0.27652	0.27109	0.00457	0.04461	-0.000284477	0.03642	-0.00682	0.03891
199.59	0.01614	0	-0.03835	1.72e-05	0.27531	0.27023	0.00331	0.04432	-0.000829151	0.03615	-0.00679	0.03867
199.79	0.01617	0	-0.03808	1.68e-05	0.27453	0.26938	0.0025	0.04404	-0.00116	0.03587	-0.00715	0.03842
199.99	0.01621	0	-0.03769	1.65e-05	0.27374	0.26852	0.0022	0.04376	-0.00203	0.0356	-0.00799	0.03817
200.19	0.01621	0	-0.03831	1.61e-05	0.27285	0.26767	0.00158	0.04347	-0.00332	0.03533	-0.00866	0.03793
200.39	0.01628	0	-0.03846	1.58e-05	0.27199	0.26682	0.00106	0.0432	-0.00443	0.03507	-0.00942	0.03769
200.59	0.01631	0	-0.03814	1.55e-05	0.27114	0.26598	0.000434027	0.04292	-0.00578	0.0348	-0.01017	0.03745
200.79	0.01626	0	-0.03794	1.52e-05	0.27003	0.26514	-0.000295651	0.04264	-0.0071	0.03454	-0.01079	0.03721
200.99	0.01625	0	-0.03838	1.49e-05	0.26924	0.2643	-0.00127	0.04237	-0.00818	0.03428	-0.01083	0.03697
201.19	0.01622	0	-0.03909	1.46e-05	0.26863	0.26346	-0.00196	0.0421	-0.00936	0.03402	-0.01125	0.03673
201.39	0.01628	0	-0.03955	1.43e-05	0.26818	0.26263	-0.00206	0.04183	-0.01037	0.03376	-0.01178	0.0365
201.59	0.01634	0	-0.03957	1.4e-05	0.26781	0.26179	-0.00279	0.04156	-0.0111	0.03351	-0.01185	0.03627
201.79	0.0163	0	-0.03952	1.37e-05	0.26675	0.26096	-0.00354	0.04129	-0.01195	0.03325	-0.01221	0.03603
201.99	0.01626	0	-0.04021	1.34e-05	0.26572	0.26014	-0.00401	0.04103	-0.01316	0.033	-0.01277	0.0358
202.19	0.01629	0	-0.04053	1.32e-05	0.26531	0.25931	-0.0051	0.04076	-0.01396	0.03275	-0.01316	0.03557
202.39	0.01629	0	-0.04071	1.29e-05	0.26471	0.25849	-0.00596	0.0405	-0.0144	0.0325	-0.01406	0.03535
202.59	0.01628	0	-0.04098	1.26e-05	0.26375	0.25767	-0.0063	0.04024	-0.01511	0.03226	-0.01491	0.03512
202.79	0.01629	0	-0.04047	1.24e-05	0.2631	0.25686	-0.0071	0.03998	-0.01545	0.03201	-0.01551	0.0349
202.99	0.01623	0	-0.04063	1.21e-05	0.26258	0.25604	-0.00781	0.03973	-0.0157	0.03177	-0.01665	0.03467
203.19	0.01618	0	-0.04057	1.19e-05	0.26195	0.25523	-0.00871	0.03947	-0.01594	0.03153	-0.01746	0.03445
203.39	0.01614	0	-0.04066	1.16e-05	0.2609	0.25443	-0.01001	0.03922	-0.01659	0.03129	-0.01818	0.03423
203.59	0.01616	0	-0.03982	1.14e-05	0.25956	0.25362	-0.01093	0.03896	-0.01637	0.03106	-0.01954	0.03401
203.79	0.01622	0	-0.03954	1.12e-05	0.25806	0.25282	-0.01107	0.03871	-0.01695	0.03082	-0.02052	0.0338
203.99	0.01618	0	-0.03967	1.09e-05	0.25703	0.25202	-0.01166	0.03847	-0.01733	0.03059	-0.02126	0.03358
204.19	0.0162	0	-0.03975	1.07e-05	0.25639	0.25122	-0.01289	0.03822	-0.01792	0.03036	-0.02215	0.03337
204.39	0.01622	0	-0.03949	1.05e-05	0.25561	0.25042	-0.01351	0.03797	-0.0184	0.03013	-0.02319	0.03315
204.59	0.0162	0	-0.03955	1.03e-05	0.2545	0.24963	-0.01438	0.03773	-0.01905	0.0299	-0.02418	0.03294
204.79	0.01621	0	-0.03983	1.01e-05	0.2532	0.24884	-0.01525	0.03749	-0.01972	0.02968	-0.02494	0.03273
204.99	0.01628	0	-0.03988	9.89e-06	0.2522	0.24805	-0.016	0.03725	-0.01963	0.02945	-0.0256	0.03252
205.19	0.01631	0	-0.03982	9.69e-06	0.25164	0.24726	-0.01644	0.03701	-0.02042	0.02923	-0.02664	0.03231
205.39	0.01637	0	-0.0404	9.49e-06	0.2502	0.24648	-0.01654	0.03677	-0.02142	0.02901	-0.02673	0.03211
205.59	0.01635	0	-0.0409	9.3e-06	0.24917	0.2457	-0.01691	0.03653	-0.02221	0.02879	-0.02707	0.0319
205.79	0.01636	0	-0.0415	9.11e-06	0.24769	0.24492	-0.01734	0.0363	-0.02313	0.02857	-0.02808	0.0317
205.99	0.01636	0	-0.04271	8.93e-06	0.24608	0.24415	-0.01755	0.03607	-0.02484	0.02835	-0.02853	0.03149
206.19	0.01639	0	-0.04307	8.74e-06	0.24542	0.24337	-0.01784	0.03583	-0.02593	0.02814	-0.02904	0.03129
206.39	0.01638	0	-0.04275	8.57e-06	0.24436	0.2426	-0.01815	0.0356	-0.02681	0.02793	-0.03032	0.03109
206.59	0.0164	0	-0.04267	8.39e-06	0.24375	0.24183	-0.01839	0.03538	-0.02837	0.02772	-0.03066	0.03089
206.79	0.01639	0	-0.04235	8.22e-06	0.24309	0.24107	-0.01893	0.03515	-0.02905	0.02751	-0.03164	0.0307
206.99	0.01634	0	-0.04334	8.06e-06	0.24267	0.2403	-0.01905	0.03492	-0.02955	0.0273	-0.03199	0.0305
207.19	0.01633	0	-0.044	7.9e-06	0.2421	0.23954	-0.01944	0.0347	-0.03053	0.02709	-0.03209	0.03031
207.39	0.01632	0	-0.04393	7.74e-06	0.24106	0.23878	-0.02012	0.03448	-0.03183	0.02689	-0.03222	0.03011
207.59	0.01627	0	-0.04399	7.58e-06	0.24004	0.23803	-0.02064	0.03425	-0.03239	0.02668	-0.03293	0.02992
207.79	0.01629	0	-0.04401	7.43e-06	0.23915	0.23727	-0.0211	0.03403	-0.03336	0.02648	-0.03285	0.02973
207.99	0.01625	0	-0.04412	7.28e-06	0.23917	0.23652	-0.02266	0.03382	-0.03345	0.02628	-0.03297	0.02954
208.19	0.01623	0	-0.04356	7.13e-06	0.23835	0.23577	-0.02351	0.0336	-0.03397	0.02608	-0.03268	0.02935
208.39	0.01626	0	-0.04368	6.98e-06	0.2373	0.23503	-0.02424	0.03338	-0.03386	0.02589	-0.03274	0.02916
208.59	0.0163	0	-0.0437	6.84e-06	0.23653	0.23428	-0.02564	0.03317	-0.0343	0.02569	-0.03341	0.02898
208.79	0.0163	0	-0.04295	6.7e-06	0.23581	0.23354	-0.0265	0.03296	-0.03418	0.0255	-0.03329	0.02879
208.99	0.01632	0	-0.04236	6.57e-06	0.2354	0.2328	-0.02741	0.03274	-0.0338	0.0253	-0.0335	0.02861
209.19	0.01632	0	-0.04223	6.44e-06	0.23522	0.23206	-0.02809	0.03253	-0.03428	0.02511	-0.03439	0.02842
209.39	0.01636	0	-0.04234	6.31e-06	0.23406	0.23133	-0.02871	0.03232	-0.03435	0.02492	-0.03448	0.02824
209.59	0.01634	0	-0.0422	6.18e-06	0.2331	0.2306	-0.02952	0.03212	-0.03507	0.02474	-0.03516	0.02806
209.79	0.01635	0	-0.04197	6.05e-06	0.23203	0.22987	-0.0307	0.03191	-0.03539	0.02455	-0.03516	0.02788
209.99	0.01638	0	-0.04201	5.93e-06	0.23095	0.22914	-0.03089	0.03171	-0.03668	0.02436	-0.03587	0.0277
210.19	0.01643	0	-0.04139	5.81e-06	0.23053	0.22841	-0.03147	0.0315	-0.0369	0.02418	-0.03679	0.02753
210.39	0.01645	0	-0.04123	5.69e-06	0.23002	0.22769	-0.03207	0.0313	-0.03742	0.024	-0.03751	0.02735
210.59	0.01649	0	-0.04139	5.58e-06	0.22963	0.22697	-0.03271	0.0311	-0.03836	0.02381	-0.03794	0.02718
210.79	0.01652	0	-0.04181	5.47e-06	0.22892	0.22625	-0.03334	0.0309	-0.0388	0.02363	-0.03876	0.027
210.99	0.01648	0	-0.04274	5.35e-06	0.22891	0.22553	-0.03338	0.0307	-0.03969	0.02346	-0.03907	0.02683
211.19	0.01646	0	-0.04364	5.25e-06	0.22862	0.22482	-0.03435	0.0305	-0.04086	0.02328	-0.03924	0.02666
211.39	0.01643	0	-0.04413	5.14e-06	0.22813	0.2241	-0.03476	0.03031	-0.04229	0.0231	-0.03986	0.02649
211.59	0.01637	0	-0.04518	5.04e-06	0.22793	0.2234	-0.03496	0.03011	-0.04273	0.02293	-0.04036	0.02632
211.79	0.01633	0	-0.04567	4.93e-06	0.22737	0.22269	-0.03512	0.02992	-0.04353	0.02275	-0.04065	0.02615
211.99	0.01634	0	-0.04575	4.83e-06	0.22666	0.22198	-0.03594	0.02973	-0.04378	0.02258	-0.04098	0.02598
212.19	0.01626	0	-0.04586	4.74e-06	0.22568	0.22128	-0.03622	0.02954	-0.04431	0.02241	-0.04182	0.02582
212.39	0.01627	0	-0.04631	4.64e-06	0.22524	0.22058	-0.03674	0.02935	-0.04485	0.02224	-0.043	0.02565
212.59	0.01626	0	-0.04633	4.55e-06	0.22466	0.21988	-0.03753	0.02916	-0.04655	0.02207	-0.04428	0.02549
212.79	0.01623	0	-0.04631	4.46e-06	0.22401	0.21918	-0.03836	0.02897	-0.04702	0.02191	-0.04474	0.02533
212.99	0.01628	0	-0.04668	4.36e-06	0.22358	0.21849	-0.03856	0.02879	-0.04752	0.02174	-0.04621	0.02516
213.19	0.0163	0	-0.04703	4.28e-06	0.22272	0.2178	-0.03926	0.0286	-0.04825	0.02158	-0.04742	0.025
213.39	0.01631	0	-0.04732	4.19e-06	0.22137	0.21711	-0.0403	0.02842	-0.04852	0.02142	-0.04804	0.02484
213.59	0.01628	0	-0.04728	4.11e-06	0.22028	0.21642	-0.04126	0.02823	-0.04877	0.02125	-0.04857	0.02469
213.79	0.01634	0	-0.04727	4.02e-06	0.21948	0.21573	-0.04231	0.02805	-0.04895	0.02109	-0.04886	0.02453
213.99	0.01643	0	-0.0474	3.94e-06	0.21859	0.21505	-0.04278	0.02787	-0.04967	0.02093	-0.04992	0.02437
214.19	0.01645	0	-0.04723	3.86e-06	0.21802	0.21437	-0.0438	0.02769	-0.04982	0.02077	-0.05047	0.02421
214.39	0.01644	0	-0.04713	3.78e-06	0.21724	0.21369	-0.04463	0.02752	-0.05042	0.02062	-0.05084	0.02406
214.59	0.01646	0	-0.04729	3.71e-06	0.21635	0.21301	-0.04549	0.02734	-0.05108	0.02046	-0.05162	0.02391
214.79	0.01648	0	-0.04786	3.63e-06	0.21527	0.21234	-0.04585	0.02716	-0.0519	0.02031	-0.05196	0.02375
214.99	0.01643	0	-0.04823	3.56e-06	0.21488	0.21167	-0.04649	0.02699	-0.05228	0.02015	-0.05252	0.0236
215.19	0.01642	0	-0.04894	3.49e-06	0.21395	0.211	-0.04722	0.02682	-0.05287	0.02	-0.05223	0.02345
215.39	0.01641	0	-0.04929	3.42e-06	0.21343	0.21033	-0.04781	0.02664	-0.05346	0.01985	-0.0529	0.0233
215.59	0.01638	0	-0.04958	3.35e-06	0.21227	0.20966	-0.04783	0.02647	-0.05368	0.0197	-0.05327	0.02315
215.79	0.01633	0	-0.04972	3.28e-06	0.21101	0.209	-0.04843	0.0263	-0.05478	0.01955	-0.054	0.023
215.99	0.01634	0	-0.04973	3.21e-06	0.2099	0.20834	-0.04888	0.02613	-0.05554	0.0194	-0.05456	0.02286
216.19	0.01633	0	-0.04992	3.15e-06	0.20982	0.20768	-0.04898	0.02597	-0.0568	0.01926	-0.05553	0.02271
216.39	0.01633	0	-0.04986	3.08e-06	0.20914	0.20702	-0.04989	0.0258	-0.05799	0.01911	-0.05577	0.02257
216.59	0.01635	0	-0.04961	3.02e-06	0.20857	0.20636	-0.05066	0.02563	-0.05885	0.01897	-0.05597	0.02242
216.79	0.01633	0	-0.04895	2.96e-06	0.20825	0.20571	-0.0512	0.02547	-0.0595	0.01882	-0.05598	0.02228
216.99	0.01638	0	-0.04933	2.9e-06	0.20722	0.20506	-0.05159	0.02531	-0.06031	0.01868	-0.05644	0.02214
217.19	0.01645	0	-0.04965	2.84e-06	0.20653	0.20441	-0.05215	0.02514	-0.06072	0.01854	-0.05624	0.02199
217.39	0.01645	0	-0.04974	2.78e-06	0.20573	0.20376	-0.05328	0.02498	-0.06058	0.0184	-0.05626	0.02185
217.59	0.01651	0	-0.04926	2.73e-06	0.205	0.20311	-0.05388	0.02482	-0.06053	0.01826	-0.05642	0.02171
217.79	0.01653	0	-0.04918	2.67e-06	0.20485	0.20247	-0.05433	0.02466	-0.06125	0.01812	-0.05604	0.02158
217.99	0.01651	0	-0.04903	2.62e-06	0.20458	0.20183	-0.05503	0.0245	-0.06191	0.01799	-0.05603	0.02144
218.19	0.01647	0	-0.04882	2.57e-06	0.20403	0.20119	-0.0554	0.02435	-0.0626	0.01785	-0.05683	0.0213
218.39	0.01644	0	-0.0486	2.51e-06	0.2037	0.20055	-0.0561	0.02419	-0.06312	0.01772	-0.05747	0.02116
218.59	0.01643	0	-0.04902	2.46e-06	0.20331	0.19992	-0.05633	0.02403	-0.06343	0.01758	-0.05884	0.02103
218.79	0.01641	0	-0.04898	2.41e-06	0.20265	0.19929	-0.05694	0.02388	-0.06406	0.01745	-0.06005	0.0209
218.99	0.01636	0	-0.04876	2.36e-06	0.20204	0.19865	-0.05764	0.02373	-0.06418	0.01732	-0.06091	0.02076
219.19	0.01636	0	-0.04917	2.32e-06	0.20108	0.19803	-0.05799	0.02357	-0.06504	0.01719	-0.06137	0.02063
219.39	0.01634	0	-0.04902	2.27e-06	0.20032	0.1974	-0.05923	0.02342	-0.0659	0.01706	-0.0625	0.0205
219.59	0.01636	0	-0.04879	2.22e-06	0.19884	0.19677	-0.05864	0.02327	-0.0675	0.01693	-0.06322	0.02037
219.79	0.01632	0	-0.04908	2.18e-06	0.1986	0.19615	-0.05862	0.02312	-0.06843	0.0168	-0.0639	0.02024
219.99	0.01636	0	-0.04901	2.13e-06	0.19774	0.19553	-0.05887	0.02297	-0.06849	0.01667	-0.06423	0.02011
220.19	0.01635	0	-0.0488	2.09e-06	0.19757	0.19491	-0.05947	0.02283	-0.06938	0.01655	-0.06507	0.01998
220.39	0.01631	0	-0.04862	2.05e-06	0.19672	0.19429	-0.06051	0.02268	-0.07	0.01642	-0.06528	0.01985
220.59	0.01635	0	-0.04865	2.01e-06	0.19573	0.19368	-0.06118	0.02253	-0.0705	0.0163	-0.065	0.01972
220.79	0.01639	0	-0.04924	1.97e-06	0.19473	0.19306	-0.06133	0.02239	-0.07212	0.01617	-0.06494	0.0196
220.99	0.01646	0	-0.04999	1.93e-06	0.19322	0.19245	-0.0626	0.02225	-0.0726	0.01605	-0.06505	0.01947
221.19	0.01649	0	-0.05077	1.89e-06	0.1923	0.19184	-0.06311	0.0221	-0.07312	0.01593	-0.06504	0.01935
221.39	0.01645	0	-0.05108	1.85e-06	0.19117	0.19123	-0.06454	0.02196	-0.07409	0.01581	-0.06508	0.01922
221.59	0.01645	0	-0.05123	1.81e-06	0.19058	0.19063	-0.06532	0.02182	-0.07462	0.01569	-0.06539	0.0191
221.79	0.01642	0	-0.05151	1.78e-06	0.19008	0.19002	-0.06546	0.02168	-0.07569	0.01557	-0.06555	0.01898
221.99	0.01646	0	-0.05156	1.74e-06	0.18982	0.18942	-0.06597	0.02154	-0.0767	0.01545	-0.06614	0.01886
222.19	0.01648	0	-0.05173	1.7e-06	0.18945	0.18882	-0.06589	0.0214	-0.077	0.01534	-0.06742	0.01874
222.39	0.01648	0	-0.05214	1.67e-06	0.18889	0.18822	-0.06675	0.02127	-0.0778	0.01522	-0.06844	0.01862
222.59	0.01648	0	-0.05225	1.64e-06	0.18804	0.18763	-0.06666	0.02113	-0.07843	0.01511	-0.06961	0.0185
222.79	0.01646	0	-0.05211	1.6e-06	0.18778	0.18703	-0.0678	0.02099	-0.07919	0.01499	-0.07069	0.01838
222.99	0.01645	0	-0.05195	1.57e-06	0.1871	0.18644	-0.06795	0.02086	-0.07949	0.01488	-0.07134	0.01826
223.19	0.01648	0	-0.05192	1.54e-06	0.1866	0.18585	-0.06877	0.02072	-0.08038	0.01477	-0.07201	0.01815
223.39	0.01647	0	-0.05146	1.51e-06	0.18594	0.18526	-0.06945	0.02059	-0.08118	0.01465	-0.07281	0.01803
223.59	0.01654	0	-0.05147	1.48e-06	0.18498	0.18468	-0.06939	0.02046	-0.08138	0.01454	-0.07326	0.01792
223.79	0.01653	0	-0.05188	1.45e-06	0.18461	0.18409	-0.07024	0.02033	-0.08144	0.01443	-0.07382	0.0178
223.99	0.01654	0	-0.05175	1.42e-06	0.18393	0.18351	-0.07084	0.0202	-0.08168	0.01432	-0.07443	0.01769
224.19	0.01648	0	-0.05188	1.39e-06	0.18367	0.18293	-0.07196	0.02007	-0.08284	0.01422	-0.07493	0.01757
224.39	0.01647	0	-0.05201	1.36e-06	0.18265	0.18235	-0.07274	0.01994	-0.08315	0.01411	-0.07501	0.01746
224.59	0.0165	0	-0.05216	1.33e-06	0.1812	0.18177	-0.07309	0.01981	-0.08372	0.014	-0.07482	0.01735
224.79	0.01653	0	-0.05251	1.31e-06	0.18023	0.18119	-0.07397	0.01968	-0.08461	0.0139	-0.07535	0.01724
224.99	0.01653	0	-0.05237	1.28e-06	0.17908	0.18062	-0.07502	0.01956	-0.0846	0.01379	-0.07569	0.01713
225.19	0.01655	0	-0.05309	1.25e-06	0.17777	0.18005	-0.07544	0.01943	-0.08441	0.01369	-0.07594	0.01702
225.39	0.01655	0	-0.05271	1.23e-06	0.17722	0.17948	-0.07575	0.01931	-0.08484	0.01358	-0.0765	0.01691
225.59	0.01655	0	-0.0527	1.2e-06	0.17655	0.17891	-0.07545	0.01918	-0.08527	0.01348	-0.07692	0.0168
225.79	0.01655	0	-0.05277	1.18e-06	0.17554	0.17834	-0.07543	0.01906	-0.08605	0.01338	-0.07724	0.0167
225.99	0.01656	0	-0.05281	1.16e-06	0.17504	0.17778	-0.07586	0.01894	-0.08629	0.01328	-0.07779	0.01659
226.19	0.01653	0	-0.05321	1.13e-06	0.1746	0.17721	-0.07645	0.01882	-0.08617	0.01318	-0.07876	0.01648
226.39	0.01653	0	-0.0535	1.11e-06	0.17429	0.17665	-0.077	0.01869	-0.08705	0.01308	-0.07961	0.01638
226.59	0.01654	0	-0.05349	1.09e-06	0.17423	0.17609	-0.07738	0.01857	-0.08747	0.01298	-0.08025	0.01627
226.79	0.01652	0	-0.05417	1.07e-06	0.1739	0.17554	-0.07807	0.01846	-0.08784	0.01288	-0.08103	0.01617
226.99	0.01654	0	-0.05427	1.04e-06	0.17387	0.17498	-0.07805	0.01834	-0.08798	0.01278	-0.08193	0.01607
227.19	0.01653	0	-0.05452	1.02e-06	0.17395	0.17443	-0.07868	0.01822	-0.08925	0.01269	-0.08249	0.01596
227.39	0.01652	0	-0.05518	1e-06	0.17339	0.17387	-0.07926	0.0181	-0.09009	0.01259	-0.0828	0.01586
227.59	0.01655	0	-0.05552	9.82e-07	0.17326	0.17332	-0.08006	0.01799	-0.09048	0.0125	-0.08323	0.01576
227.79	0.01651	0	-0.05569	9.62e-07	0.17357	0.17277	-0.08049	0.01787	-0.09146	0.0124	-0.08357	0.01566
227.99	0.01651	0	-0.05552	9.43e-07	0.17285	0.17223	-0.08072	0.01776	-0.09239	0.01231	-0.08395	0.01556
228.19	0.01645	0	-0.05547	9.24e-07	0.17233	0.17168	-0.08151	0.01764	-0.09304	0.01222	-0.08443	0.01546
228.39	0.0165	0	-0.05544	9.05e-07	0.17172	0.17114	-0.08169	0.01753	-0.09326	0.01212	-0.08492	0.01536
228.59	0.01661	0	-0.05533	8.87e-07	0.17076	0.1706	-0.08169	0.01742	-0.09386	0.01203	-0.08535	0.01526
228.79	0.01667	0	-0.05561	8.69e-07	0.17019	0.17005	-0.08258	0.0173	-0.09424	0.01194	-0.08544	0.01516
228.99	0.0167	0	-0.05544	8.51e-07	0.16946	0.16952	-0.08246	0.01719	-0.09453	0.01185	-0.08571	0.01507
229.19	0.01672	0	-0.05533	8.34e-07	0.16853	0.16898	-0.08316	0.01708	-0.09478	0.01176	-0.08632	0.01497
229.39	0.01669	0	-0.05517	8.17e-07	0.16787	0.16844	-0.08298	0.01697	-0.09572	0.01167	-0.08605	0.01488
229.59	0.0167	0	-0.05509	8e-07	0.16646	0.16791	-0.08336	0.01686	-0.09653	0.01158	-0.08565	0.01478
229.79	0.01664	0	-0.05516	7.84e-07	0.16585	0.16738	-0.08431	0.01676	-0.0966	0.0115	-0.08627	0.01469
229.99	0.01664	0	-0.05485	7.68e-07	0.16504	0.16685	-0.08478	0.01665	-0.09649	0.01141	-0.08706	0.01459
230.19	0.01664	0	-0.05485	7.53e-07	0.16488	0.16632	-0.0853	0.01654	-0.09683	0.01132	-0.08723	0.0145
230.39	0.01663	0	-0.05461	7.38e-07	0.16426	0.16579	-0.08533	0.01643	-0.09751	0.01124	-0.08729	0.01441
230.59	0.01664	0	-0.05471	7.23e-07	0.16367	0.16527	-0.08581	0.01633	-0.09817	0.01115	-0.08773	0.01431
230.79	0.01667	0	-0.05487	7.08e-07	0.16303	0.16474	-0.08596	0.01622	-0.09871	0.01107	-0.08819	0.01422
230.99	0.01669	0	-0.05447	6.94e-07	0.16322	0.16422	-0.08663	0.01612	-0.09936	0.01098	-0.08866	0.01413
231.19	0.01671	0	-0.05492	6.8e-07	0.1624	0.1637	-0.08745	0.01602	-0.1004	0.0109	-0.08894	0.01404
231.39	0.01671	0	-0.05524	6.66e-07	0.16214	0.16318	-0.08807	0.01591	-0.10075	0.01082	-0.0892	0.01395
231.59	0.01669	0	-0.05514	6.52e-07	0.16198	0.16267	-0.0886	0.01581	-0.10137	0.01074	-0.08942	0.01386
231.79	0.0167	0	-0.05537	6.39e-07	0.16125	0.16215	-0.08925	0.01571	-0.10199	0.01066	-0.08955	0.01377
231.99	0.01668	0	-0.05557	6.26e-07	0.16048	0.16164	-0.08975	0.01561	-0.10199	0.01058	-0.09057	0.01369
232.19	0.01669	0	-0.05601	6.14e-07	0.1606	0.16113	-0.09049	0.01551	-0.10226	0.0105	-0.09106	0.0136
232.39	0.01679	0	-0.05611	6.01e-07	0.16017	0.16062	-0.09124	0.01541	-0.10243	0.01042	-0.09128	0.01351
232.59	0.01683	0	-0.05611	5.89e-07	0.15987	0.16011	-0.09194	0.01531	-0.10302	0.01034	-0.09158	0.01343
232.79	0.01681	0	-0.05639	5.77e-07	0.1598	0.1596	-0.0927	0.01521	-0.10366	0.01026	-0.0921	0.01334
232.99	0.01679	0	-0.05616	5.65e-07	0.15901	0.1591	-0.09359	0.01511	-0.10446	0.01018	-0.09288	0.01325
233.19	0.01673	0	-0.05622	5.54e-07	0.15851	0.15859	-0.09436	0.01502	-0.10537	0.0101	-0.09333	0.01317
233.39	0.01673	0	-0.05606	5.43e-07	0.15773	0.15809	-0.09446	0.01492	-0.10582	0.01003	-0.09306	0.01309
233.59	0.01669	0	-0.05616	5.32e-07	0.1569	0.15759	-0.09482	0.01482	-0.10591	0.00995	-0.0939	0.013
233.79	0.01664	0	-0.0562	5.21e-07	0.15646	0.15709	-0.09566	0.01473	-0.10615	0.00988	-0.09443	0.01292
233.99	0.01664	0	-0.05615	5.11e-07	0.15539	0.15659	-0.09623	0.01464	-0.10601	0.0098	-0.0946	0.01284
234.19	0.01658	0	-0.05603	5e-07	0.15486	0.1561	-0.09729	0.01454	-0.10703	0.00973	-0.09422	0.01275
234.39	0.0166	0	-0.05594	4.9e-07	0.15393	0.1556	-0.09803	0.01445	-0.10737	0.00966	-0.09447	0.01267
234.59	0.01665	0	-0.05626	4.8e-07	0.15347	0.15511	-0.09895	0.01436	-0.10792	0.00958	-0.09488	0.01259
234.79	0.01669	0	-0.05642	4.7e-07	0.15242	0.15462	-0.09985	0.01426	-0.10852	0.00951	-0.09518	0.01251
234.99	0.01669	0	-0.05643	4.61e-07	0.15139	0.15413	-0.10108	0.01417	-0.1095	0.00944	-0.09567	0.01243
235.19	0.0167	0	-0.05657	4.52e-07	0.15052	0.15364	-0.10148	0.01408	-0.11041	0.00937	-0.09622	0.01235
235.39	0.01664	0	-0.05624	4.43e-07	0.15044	0.15315	-0.10161	0.01399	-0.11118	0.0093	-0.09666	0.01227
235.59	0.0166	0	-0.05603	4.34e-07	0.14979	0.15267	-0.10211	0.0139	-0.11203	0.00923	-0.09675	0.01219
235.79	0.01664	0	-0.05558	4.25e-07	0.14906	0.15218	-0.10257	0.01381	-0.11198	0.00916	-0.09752	0.01212
235.99	0.01665	0	-0.05583	4.16e-07	0.14854	0.1517	-0.10236	0.01372	-0.11209	0.00909	-0.09841	0.01204
236.19	0.01673	0	-0.05592	4.08e-07	0.14781	0.15122	-0.10268	0.01363	-0.1133	0.00902	-0.09849	0.01196
236.39	0.01676	0	-0.05628	4e-07	0.14771	0.15074	-0.10307	0.01355	-0.11366	0.00895	-0.09914	0.01189
236.59	0.01676	0	-0.05646	3.91e-07	0.14782	0.15027	-0.10318	0.01346	-0.11437	0.00888	-0.09985	0.01181
236.79	0.01671	0	-0.05662	3.84e-07	0.14732	0.14979	-0.10303	0.01337	-0.11543	0.00882	-0.1007	0.01173
236.99	0.01671	0	-0.05663	3.76e-07	0.14684	0.14931	-0.1033	0.01329	-0.11649	0.00875	-0.10073	0.01166
237.19	0.01671	0	-0.05689	3.68e-07	0.14674	0.14884	-0.1028	0.0132	-0.11716	0.00868	-0.10102	0.01158
237.39	0.01672	0	-0.05724	3.61e-07	0.14594	0.14837	-0.10257	0.01312	-0.11768	0.00862	-0.10103	0.01151
237.59	0.0167	0	-0.058	3.53e-07	0.14551	0.1479	-0.10263	0.01303	-0.11789	0.00855	-0.10137	0.01144
237.79	0.01673	0	-0.0583	3.46e-07	0.14497	0.14743	-0.10338	0.01295	-0.1184	0.00849	-0.10116	0.01136
237.99	0.01672	0	-0.05899	3.39e-07	0.14437	0.14696	-0.10382	0.01287	-0.11867	0.00842	-0.10132	0.01129
238.19	0.01671	0	-0.05941	3.32e-07	0.14355	0.1465	-0.10463	0.01278	-0.11969	0.00836	-0.10129	0.01122
238.39	0.01676	0	-0.06016	3.26e-07	0.14272	0.14604	-0.10506	0.0127	-0.11982	0.0083	-0.10174	0.01115
238.59	0.01677	0	-0.06061	3.19e-07	0.14191	0.14557	-0.10561	0.01262	-0.12032	0.00823	-0.10199	0.01108
238.79	0.01679	0	-0.06099	3.13e-07	0.14076	0.14511	-0.10628	0.01254	-0.12092	0.00817	-0.10232	0.01101
238.99	0.01679	0	-0.06102	3.06e-07	0.13991	0.14465	-0.10666	0.01246	-0.12132	0.00811	-0.10249	0.01094
239.19	0.01678	0	-0.06108	3e-07	0.13937	0.14419	-0.10664	0.01238	-0.12148	0.00805	-0.10252	0.01087
239.39	0.01677	0	-0.06103	2.94e-07	0.1387	0.14374	-0.10673	0.0123	-0.1216	0.00799	-0.10271	0.0108
239.59	0.01681	0	-0.06101	2.88e-07	0.13777	0.14328	-0.10689	0.01222	-0.12173	0.00793
239.79	0	0	-0.06105	2.82e-07	0.1369	0.14283	-0.10687	0.01214	-0.1216	0.00787
