# Supplementary material for: Drug targeting Nsp1-ribosomal complex shows antiviral activity against SARS-CoV-2
Source: eLife journal article supplement (doi:10.7554/elife.74877), 2022-03-24
Supplement: supp [file Figure 1 source data 3_Nano-DSF.xlsx]

## Sheet: Montelukast
Temperature	0 uM	2uM	4uM	8uM	16 uM
20	0.660758	0.629423	0.730059	0.669287	0.723306
20.011	0.660758	0.629423	0.730059	0.669287	0.723306
20.022	0.660758	0.629423	0.730059	0.669287	0.723306
20.033	0.660758	0.629423	0.730059	0.669287	0.723306
20.043	0.660758	0.629423	0.730059	0.669578	0.723306
20.054	0.660758	0.629423	0.730059	0.669578	0.723306
20.065	0.660758	0.629423	0.730059	0.669578	0.723306
20.076	0.660758	0.629423	0.730059	0.669578	0.723306
20.087	0.660758	0.629423	0.730059	0.669578	0.723306
20.098	0.660758	0.629423	0.730059	0.669578	0.723306
20.108	0.660758	0.629423	0.730059	0.669578	0.723306
20.119	0.660758	0.629423	0.730059	0.669578	0.723306
20.13	0.660758	0.629423	0.730059	0.669578	0.723306
20.141	0.660758	0.629423	0.730059	0.669578	0.723306
20.152	0.660758	0.629423	0.730059	0.669578	0.723306
20.163	0.660758	0.629423	0.730059	0.669578	0.723306
20.174	0.660758	0.629423	0.730059	0.669578	0.723306
20.184	0.660758	0.629423	0.730059	0.669869	0.723306
20.195	0.660758	0.629423	0.730059	0.669869	0.723306
20.206	0.660758	0.629423	0.730059	0.669869	0.723306
20.217	0.660758	0.629423	0.730059	0.669869	0.723306
20.228	0.660758	0.629423	0.730059	0.669869	0.723306
20.239	0.660758	0.629423	0.730059	0.669869	0.723306
20.25	0.660758	0.629423	0.730059	0.669869	0.723306
20.26	0.660758	0.629423	0.730059	0.669869	0.723306
20.271	0.660758	0.629423	0.730059	0.669869	0.723306
20.282	0.660758	0.629423	0.730059	0.669869	0.723306
20.293	0.660758	0.629423	0.730059	0.669869	0.723306
20.304	0.660758	0.629423	0.730059	0.669869	0.723306
20.315	0.660758	0.629423	0.730059	0.669869	0.723306
20.325	0.660758	0.629423	0.730059	0.67016	0.723306
20.336	0.660758	0.629423	0.730059	0.67016	0.723306
20.347	0.660758	0.629423	0.730059	0.67016	0.723306
20.358	0.660758	0.629423	0.730059	0.67016	0.723306
20.369	0.660758	0.629423	0.730059	0.67016	0.723306
20.38	0.660758	0.629423	0.730059	0.67016	0.723306
20.391	0.660758	0.629423	0.730059	0.67016	0.723306
20.401	0.660758	0.629423	0.730059	0.67016	0.723306
20.412	0.660758	0.629423	0.730059	0.67016	0.723306
20.423	0.660758	0.629423	0.730059	0.67016	0.723306
20.434	0.660758	0.629423	0.730059	0.67016	0.723306
20.445	0.660758	0.629423	0.730059	0.67016	0.723306
20.456	0.660758	0.629423	0.730059	0.670451	0.723306
20.466	0.660758	0.629423	0.730059	0.670451	0.723306
20.477	0.660758	0.629423	0.730059	0.670451	0.723306
20.488	0.660758	0.629423	0.730059	0.670451	0.723306
20.499	0.660758	0.629423	0.730059	0.670451	0.723306
20.51	0.660758	0.629423	0.730059	0.670451	0.723306
20.521	0.660758	0.629423	0.730059	0.670451	0.723306
20.532	0.660758	0.629423	0.730059	0.670451	0.723306
20.542	0.660758	0.629423	0.730059	0.670451	0.723306
20.553	0.660758	0.629423	0.730059	0.670451	0.723306
20.564	0.660758	0.629423	0.730059	0.670451	0.723306
20.575	0.660758	0.629423	0.730059	0.670451	0.723306
20.586	0.660758	0.629423	0.730059	0.670451	0.723306
20.597	0.660758	0.629423	0.730059	0.670742	0.723306
20.607	0.660758	0.629423	0.730059	0.670742	0.723306
20.618	0.660758	0.629423	0.730059	0.670742	0.723306
20.629	0.660758	0.629423	0.730059	0.670742	0.723306
20.64	0.660758	0.629423	0.730059	0.670742	0.723306
20.651	0.660758	0.629423	0.730059	0.670742	0.723306
20.662	0.660758	0.629423	0.730059	0.670742	0.723306
20.673	0.660758	0.629423	0.730059	0.670742	0.723306
20.683	0.660758	0.629423	0.730059	0.670742	0.723306
20.694	0.660758	0.629423	0.730059	0.670742	0.723306
20.705	0.660758	0.629423	0.730059	0.670742	0.723306
20.716	0.660758	0.629423	0.730059	0.670742	0.723306
20.727	0.660758	0.629423	0.730059	0.671033	0.723306
20.738	0.660758	0.629423	0.730059	0.671033	0.723306
20.749	0.660758	0.629423	0.730059	0.671033	0.723306
20.759	0.660758	0.629423	0.730059	0.671033	0.723306
20.77	0.660758	0.629423	0.730059	0.671033	0.723306
20.781	0.660758	0.629423	0.730059	0.671033	0.723306
20.792	0.660758	0.629423	0.730059	0.671033	0.723306
20.803	0.660758	0.629423	0.730059	0.671033	0.723096
20.814	0.660758	0.629423	0.730059	0.671033	0.723096
20.824	0.660758	0.629423	0.730059	0.671033	0.723096
20.835	0.660758	0.629423	0.730059	0.671033	0.723096
20.846	0.660758	0.629423	0.730059	0.671033	0.723096
20.857	0.660758	0.629423	0.730059	0.671325	0.723096
20.868	0.660758	0.629423	0.730059	0.671325	0.723096
20.879	0.660758	0.629423	0.730059	0.671325	0.723096
20.89	0.660758	0.629423	0.730059	0.671325	0.723096
20.9	0.660758	0.629423	0.730059	0.671325	0.723096
20.911	0.660758	0.629423	0.730059	0.671325	0.723096
20.922	0.660758	0.629423	0.730059	0.671325	0.723096
20.933	0.660758	0.629423	0.730059	0.671325	0.723096
20.944	0.660758	0.629423	0.730059	0.671325	0.723096
20.955	0.660758	0.629423	0.730059	0.671325	0.723096
20.965	0.660758	0.629423	0.730059	0.671325	0.723096
20.976	0.660758	0.629423	0.730059	0.671325	0.723096
20.987	0.660758	0.629423	0.729639	0.671616	0.723306
20.998	0.660758	0.629423	0.729639	0.671616	0.723306
21.009	0.660758	0.629423	0.729639	0.671616	0.723306
21.02	0.660758	0.629423	0.729639	0.671616	0.723306
21.031	0.660758	0.629423	0.729639	0.671616	0.723306
21.041	0.660758	0.629423	0.729639	0.671616	0.723306
21.052	0.660758	0.629423	0.729639	0.671616	0.723306
21.063	0.660758	0.629423	0.729639	0.671616	0.723306
21.074	0.660758	0.629423	0.729639	0.671616	0.723306
21.085	0.660758	0.629423	0.729639	0.671616	0.723306
21.096	0.660758	0.629423	0.729639	0.671616	0.723306
21.106	0.660758	0.629423	0.729639	0.671616	0.723306
21.117	0.660758	0.629423	0.729639	0.671907	0.723306
21.128	0.660758	0.629423	0.729639	0.671907	0.723306
21.139	0.660758	0.629423	0.729639	0.671907	0.723306
21.15	0.660758	0.629423	0.729639	0.671907	0.723306
21.161	0.660758	0.629423	0.729639	0.671907	0.723306
21.172	0.660758	0.629423	0.729639	0.671907	0.723306
21.182	0.660758	0.629423	0.729639	0.671907	0.723306
21.193	0.660758	0.629423	0.729639	0.671907	0.723306
21.204	0.660758	0.629423	0.729639	0.671907	0.723306
21.215	0.660758	0.629423	0.729639	0.671907	0.723306
21.226	0.660758	0.629423	0.729639	0.671907	0.723306
21.237	0.660758	0.629423	0.729639	0.671907	0.723306
21.248	0.660758	0.629423	0.729639	0.672198	0.723306
21.258	0.660758	0.629423	0.729639	0.672198	0.723306
21.269	0.660758	0.629423	0.729639	0.672198	0.723306
21.28	0.660758	0.629423	0.729639	0.672198	0.723306
21.291	0.660758	0.629423	0.729639	0.672198	0.723306
21.302	0.660758	0.629423	0.729639	0.672198	0.723306
21.313	0.660758	0.629423	0.729639	0.672198	0.723306
21.323	0.660758	0.629423	0.729639	0.672198	0.723306
21.334	0.660758	0.629423	0.729639	0.672198	0.723306
21.345	0.660758	0.629423	0.729639	0.672198	0.723306
21.356	0.660758	0.629423	0.729639	0.672198	0.723306
21.367	0.660758	0.629423	0.729639	0.672198	0.723306
21.378	0.660758	0.629423	0.729639	0.672489	0.723306
21.389	0.660758	0.629423	0.729639	0.672489	0.723306
21.399	0.660758	0.629423	0.729639	0.672489	0.723306
21.41	0.660758	0.629423	0.729639	0.672489	0.723306
21.421	0.660758	0.629423	0.729639	0.672489	0.723306
21.432	0.660758	0.629423	0.729639	0.672489	0.723306
21.443	0.660758	0.629423	0.729639	0.672489	0.723306
21.454	0.660758	0.629423	0.729639	0.672489	0.723306
21.464	0.660758	0.629423	0.729639	0.672489	0.723306
21.475	0.660758	0.629423	0.729639	0.672489	0.723306
21.486	0.660758	0.629423	0.729639	0.672489	0.723306
21.497	0.660758	0.629423	0.729639	0.672489	0.723306
21.508	0.660758	0.629423	0.729639	0.67278	0.723306
21.519	0.660758	0.629423	0.729639	0.67278	0.723306
21.53	0.660758	0.629423	0.729639	0.67278	0.723306
21.54	0.660758	0.629423	0.729639	0.67278	0.723306
21.551	0.660758	0.629423	0.729639	0.67278	0.723306
21.562	0.660758	0.629423	0.729639	0.67278	0.723306
21.573	0.660758	0.629423	0.729639	0.67278	0.723306
21.584	0.660758	0.629423	0.729639	0.67278	0.723306
21.595	0.660758	0.629423	0.729639	0.67278	0.723306
21.605	0.660758	0.629423	0.729639	0.67278	0.723306
21.616	0.660758	0.629423	0.729639	0.67278	0.723306
21.627	0.660758	0.629423	0.729639	0.67278	0.723306
21.638	0.660758	0.629423	0.729639	0.673071	0.723306
21.649	0.660758	0.629423	0.729639	0.673071	0.723306
21.66	0.660758	0.629423	0.729639	0.673071	0.723306
21.671	0.660758	0.629423	0.729639	0.673071	0.723306
21.681	0.660758	0.629423	0.729639	0.673071	0.723306
21.692	0.660758	0.629423	0.729639	0.673071	0.723306
21.703	0.660758	0.629423	0.729639	0.673071	0.723306
21.714	0.660758	0.629423	0.729639	0.673071	0.723306
21.725	0.660758	0.629423	0.729639	0.673071	0.723306
21.736	0.660758	0.629423	0.729639	0.673071	0.723306
21.747	0.660758	0.629423	0.729639	0.673071	0.723306
21.757	0.660758	0.629423	0.729639	0.673071	0.723306
21.768	0.660758	0.629423	0.729639	0.673362	0.723306
21.779	0.660758	0.629423	0.729639	0.673362	0.723306
21.79	0.660758	0.629423	0.729639	0.673362	0.723096
21.801	0.660758	0.629423	0.729639	0.673362	0.723096
21.812	0.660758	0.629423	0.729639	0.673362	0.723096
21.822	0.660758	0.629423	0.729219	0.673362	0.723096
21.833	0.660758	0.629423	0.729219	0.673362	0.723096
21.844	0.660758	0.629423	0.729219	0.673362	0.723096
21.855	0.660758	0.629423	0.729219	0.673362	0.723096
21.866	0.660758	0.629423	0.729219	0.673362	0.723096
21.877	0.660758	0.629423	0.729219	0.673362	0.723096
21.888	0.660758	0.629423	0.729219	0.673362	0.723096
21.898	0.660758	0.629423	0.729219	0.673654	0.723096
21.909	0.660758	0.629423	0.729219	0.673654	0.723096
21.92	0.660758	0.629423	0.729219	0.673654	0.723096
21.931	0.660758	0.629423	0.729219	0.673654	0.723096
21.942	0.660758	0.629423	0.729219	0.673654	0.723096
21.953	0.660758	0.629423	0.729219	0.673654	0.723096
21.963	0.660758	0.629423	0.729219	0.673654	0.723096
21.974	0.660758	0.629423	0.729219	0.673654	0.723096
21.985	0.660758	0.629423	0.729219	0.673654	0.723096
21.996	0.660758	0.629423	0.729219	0.673654	0.723096
22.007	0.660758	0.629423	0.729219	0.673654	0.723096
22.018	0.660758	0.629423	0.729219	0.673654	0.723096
22.029	0.660758	0.629423	0.729219	0.673654	0.723096
22.039	0.660758	0.629423	0.729219	0.673945	0.723096
22.05	0.660758	0.629423	0.729219	0.673945	0.723096
22.061	0.660758	0.629423	0.729219	0.673945	0.723096
22.072	0.660758	0.629423	0.729219	0.673945	0.723096
22.083	0.660758	0.629423	0.729219	0.673945	0.723096
22.094	0.660758	0.629423	0.729219	0.673945	0.723096
22.105	0.660758	0.629423	0.729219	0.673945	0.723096
22.115	0.660758	0.629423	0.729219	0.673945	0.723096
22.126	0.660758	0.629423	0.729219	0.673945	0.723096
22.137	0.660758	0.629423	0.729219	0.673945	0.723096
22.148	0.660758	0.629423	0.729219	0.673945	0.723096
22.159	0.660758	0.629423	0.729219	0.673945	0.723096
22.17	0.660758	0.629423	0.729219	0.673945	0.723096
22.18	0.660758	0.629423	0.729219	0.674236	0.723096
22.191	0.660758	0.629423	0.729219	0.674236	0.723096
22.202	0.660758	0.629423	0.729219	0.674236	0.723096
22.213	0.660758	0.629423	0.729219	0.674236	0.723096
22.224	0.660758	0.629423	0.729219	0.674236	0.723096
22.235	0.660758	0.629423	0.729219	0.674236	0.723096
22.246	0.660758	0.629423	0.729219	0.674236	0.723096
22.256	0.660758	0.629423	0.729219	0.674236	0.723096
22.267	0.660758	0.629423	0.729219	0.674236	0.723096
22.278	0.660758	0.629423	0.729219	0.674236	0.723096
22.289	0.660758	0.629423	0.729219	0.674236	0.723096
22.3	0.660758	0.629423	0.729219	0.674236	0.723096
22.311	0.660758	0.629423	0.729219	0.674236	0.723096
22.321	0.660758	0.629423	0.729219	0.674527	0.723096
22.332	0.660758	0.629423	0.729219	0.674527	0.723096
22.343	0.660758	0.629423	0.729219	0.674527	0.723096
22.354	0.660758	0.629423	0.729219	0.674527	0.723096
22.365	0.660758	0.629423	0.729219	0.674527	0.723096
22.376	0.660758	0.629423	0.729219	0.674527	0.723096
22.387	0.660758	0.629423	0.729219	0.674527	0.723096
22.397	0.660758	0.629423	0.729219	0.674527	0.723096
22.408	0.660758	0.629423	0.729219	0.674527	0.723096
22.419	0.660758	0.629423	0.729219	0.674527	0.723096
22.43	0.660758	0.629423	0.729219	0.674527	0.723096
22.441	0.660758	0.629423	0.729219	0.674527	0.723096
22.452	0.660758	0.629423	0.728799	0.674527	0.723096
22.462	0.660758	0.629423	0.728799	0.674527	0.723096
22.473	0.660758	0.629423	0.728799	0.674818	0.723096
22.484	0.660758	0.629423	0.728799	0.674818	0.723096
22.495	0.660758	0.629423	0.728799	0.674818	0.723096
22.506	0.660758	0.629423	0.728799	0.674818	0.723096
22.517	0.660758	0.629423	0.728799	0.674818	0.722887
22.528	0.660758	0.629423	0.728799	0.674818	0.722887
22.538	0.660758	0.629423	0.728799	0.674818	0.722887
22.549	0.660758	0.629423	0.728799	0.674818	0.722887
22.56	0.660758	0.629423	0.728799	0.674818	0.722887
22.571	0.660758	0.629423	0.728799	0.674818	0.722887
22.582	0.660758	0.629423	0.728799	0.674818	0.722887
22.593	0.660758	0.629423	0.728799	0.674818	0.722887
22.604	0.660758	0.629423	0.728799	0.674818	0.722887
22.614	0.660758	0.629423	0.728799	0.674818	0.722887
22.625	0.660758	0.629423	0.728799	0.675109	0.722887
22.636	0.660758	0.629423	0.728799	0.675109	0.722887
22.647	0.660758	0.629423	0.728799	0.675109	0.722887
22.658	0.660758	0.629423	0.728799	0.675109	0.722887
22.669	0.660758	0.629423	0.728799	0.675109	0.722887
22.679	0.660758	0.629423	0.728799	0.675109	0.722887
22.69	0.660758	0.629423	0.728799	0.675109	0.722887
22.701	0.660758	0.629423	0.728799	0.675109	0.722887
22.712	0.660758	0.629423	0.728799	0.675109	0.722887
22.723	0.660758	0.629423	0.728799	0.675109	0.722887
22.734	0.660758	0.629423	0.728799	0.675109	0.722887
22.745	0.660758	0.629423	0.728799	0.675109	0.722887
22.755	0.660758	0.629423	0.728799	0.675109	0.722887
22.766	0.660758	0.629423	0.728799	0.675109	0.722887
22.777	0.660758	0.629423	0.728799	0.675109	0.722887
22.788	0.660758	0.629423	0.728799	0.6754	0.722887
22.799	0.660758	0.629423	0.728799	0.6754	0.722887
22.81	0.660758	0.629423	0.728799	0.6754	0.722887
22.82	0.660758	0.629423	0.728799	0.6754	0.722887
22.831	0.660758	0.629423	0.728799	0.6754	0.722887
22.842	0.660758	0.629423	0.728799	0.6754	0.722887
22.853	0.660758	0.629423	0.728799	0.6754	0.722887
22.864	0.660758	0.629423	0.728799	0.6754	0.722887
22.875	0.660758	0.629423	0.728799	0.6754	0.722887
22.886	0.660758	0.629423	0.728799	0.6754	0.722887
22.896	0.660758	0.629423	0.728799	0.6754	0.722887
22.907	0.660758	0.629423	0.728799	0.6754	0.722887
22.918	0.660758	0.629423	0.728799	0.6754	0.722887
22.929	0.660758	0.629423	0.728799	0.6754	0.722887
22.94	0.660758	0.629423	0.728799	0.675691	0.722887
22.951	0.660758	0.629423	0.72838	0.675691	0.722887
22.961	0.660758	0.629423	0.72838	0.675691	0.722887
22.972	0.660758	0.629423	0.72838	0.675691	0.722887
22.983	0.660758	0.629423	0.72838	0.675691	0.722887
22.994	0.660758	0.629423	0.72838	0.675691	0.722887
23.005	0.660758	0.629423	0.72838	0.675691	0.722887
23.016	0.660758	0.629423	0.72838	0.675691	0.722887
23.027	0.660758	0.629423	0.72838	0.675691	0.722887
23.037	0.660758	0.629423	0.72838	0.675691	0.722887
23.048	0.660758	0.629423	0.72838	0.675691	0.722887
23.059	0.660758	0.629423	0.72838	0.675691	0.722887
23.07	0.660758	0.629423	0.72838	0.675691	0.722887
23.081	0.660758	0.629423	0.72838	0.675691	0.722887
23.092	0.660758	0.629423	0.72838	0.675691	0.722677
23.103	0.660758	0.629423	0.72838	0.675691	0.722677
23.113	0.660758	0.629423	0.72838	0.675691	0.722677
23.124	0.660758	0.629423	0.72796	0.675691	0.722677
23.135	0.660758	0.629423	0.72796	0.6754	0.722677
23.146	0.660758	0.629423	0.72796	0.6754	0.722677
23.157	0.660758	0.629423	0.72796	0.6754	0.722677
23.168	0.660758	0.629423	0.72796	0.6754	0.722677
23.178	0.660758	0.629423	0.72796	0.6754	0.722677
23.189	0.660758	0.629423	0.72796	0.6754	0.722677
23.2	0.660758	0.629423	0.72796	0.6754	0.722677
23.211	0.660758	0.629423	0.72796	0.6754	0.722677
23.222	0.660758	0.629423	0.72796	0.6754	0.722677
23.233	0.660758	0.629423	0.72796	0.6754	0.722677
23.244	0.660758	0.629423	0.72754	0.6754	0.722677
23.254	0.660758	0.629423	0.72754	0.6754	0.722677
23.265	0.660758	0.629423	0.72754	0.6754	0.722677
23.276	0.660758	0.629423	0.72754	0.6754	0.722677
23.287	0.660758	0.629423	0.72754	0.6754	0.722677
23.298	0.660758	0.629423	0.72754	0.6754	0.722677
23.309	0.660758	0.629423	0.72754	0.675109	0.722677
23.319	0.660758	0.629423	0.72754	0.675109	0.722677
23.33	0.660758	0.629423	0.72754	0.675109	0.722677
23.341	0.660758	0.629423	0.72754	0.675109	0.722677
23.352	0.660758	0.629423	0.72712	0.675109	0.722677
23.363	0.660758	0.629423	0.72712	0.675109	0.722677
23.374	0.660758	0.629423	0.72712	0.675109	0.722677
23.385	0.660758	0.629423	0.72712	0.675109	0.722677
23.395	0.660758	0.629423	0.72712	0.675109	0.722677
23.406	0.660758	0.629423	0.72712	0.675109	0.722677
23.417	0.660758	0.629423	0.72712	0.674818	0.722677
23.428	0.660758	0.629423	0.72712	0.674818	0.722677
23.439	0.660758	0.629423	0.7267	0.674818	0.722677
23.45	0.660758	0.629423	0.7267	0.674818	0.722677
23.46	0.660758	0.629423	0.7267	0.674818	0.722677
23.471	0.660758	0.629423	0.7267	0.674818	0.722677
23.482	0.660758	0.629423	0.7267	0.674818	0.722677
23.493	0.660758	0.630043	0.7267	0.674818	0.722677
23.504	0.660758	0.630043	0.7267	0.674527	0.722677
23.515	0.660758	0.630043	0.7267	0.674527	0.722677
23.526	0.660758	0.630043	0.72628	0.674527	0.722677
23.536	0.660758	0.630043	0.72628	0.674527	0.722677
23.547	0.660758	0.630043	0.72628	0.674527	0.722677
23.558	0.660758	0.630043	0.72628	0.674527	0.722677
23.569	0.660758	0.630043	0.72628	0.674527	0.722467
23.58	0.660758	0.630043	0.72628	0.674527	0.722467
23.591	0.660758	0.630043	0.72628	0.674236	0.722467
23.602	0.660758	0.630043	0.725861	0.674236	0.722467
23.612	0.660758	0.630043	0.725861	0.674236	0.722467
23.623	0.660758	0.630043	0.725861	0.674236	0.722467
23.634	0.660758	0.630043	0.725861	0.674236	0.722467
23.645	0.660758	0.630043	0.725861	0.674236	0.722467
23.656	0.660758	0.630043	0.725861	0.673945	0.722467
23.667	0.660758	0.630043	0.725441	0.673945	0.722467
23.677	0.660758	0.630043	0.725441	0.673945	0.722467
23.688	0.660758	0.630043	0.725441	0.673945	0.722467
23.699	0.660758	0.630043	0.725441	0.673945	0.722467
23.71	0.660758	0.630043	0.725441	0.673945	0.722467
23.721	0.660758	0.630043	0.725441	0.673654	0.722467
23.732	0.660758	0.630043	0.725441	0.673654	0.722467
23.743	0.660758	0.630043	0.725021	0.673654	0.722467
23.753	0.660758	0.630043	0.725021	0.673654	0.722467
23.764	0.660758	0.630043	0.725021	0.673654	0.722467
23.775	0.660758	0.630043	0.725021	0.673362	0.722467
23.786	0.660758	0.630043	0.725021	0.673362	0.722467
23.797	0.660758	0.630043	0.724601	0.673362	0.722467
23.808	0.660758	0.630043	0.724601	0.673362	0.722467
23.818	0.660758	0.630043	0.724601	0.673362	0.722467
23.829	0.660758	0.630043	0.724601	0.673071	0.722467
23.84	0.660758	0.630043	0.724601	0.673071	0.722467
23.851	0.660758	0.630043	0.724601	0.673071	0.722467
23.862	0.660758	0.630043	0.724181	0.673071	0.722467
23.873	0.660758	0.630043	0.724181	0.673071	0.722467
23.884	0.660758	0.630043	0.724181	0.67278	0.722467
23.894	0.660758	0.630043	0.724181	0.67278	0.722467
23.905	0.660758	0.630043	0.724181	0.67278	0.722467
23.916	0.660758	0.630043	0.723762	0.67278	0.722467
23.927	0.660758	0.630043	0.723762	0.67278	0.722467
23.938	0.660758	0.630043	0.723762	0.672489	0.722467
23.949	0.660758	0.630043	0.723762	0.672489	0.722467
23.96	0.660758	0.630043	0.723762	0.672489	0.722467
23.97	0.660758	0.630043	0.723762	0.672489	0.722467
23.981	0.660758	0.630043	0.723342	0.672489	0.722257
23.992	0.660758	0.630043	0.723342	0.672198	0.722257
24.003	0.660758	0.630043	0.723342	0.672198	0.722257
24.014	0.660758	0.630043	0.723342	0.672198	0.722257
24.025	0.661369	0.630043	0.723342	0.672198	0.722257
24.035	0.661369	0.630043	0.722922	0.671907	0.722257
24.046	0.661369	0.630043	0.722922	0.671907	0.722257
24.057	0.661369	0.630043	0.722922	0.671907	0.722257
24.068	0.661369	0.630043	0.722922	0.671907	0.722257
24.079	0.661369	0.630043	0.722922	0.671616	0.722257
24.09	0.661369	0.630043	0.722502	0.671616	0.722257
24.101	0.661369	0.630043	0.722502	0.671616	0.722257
24.111	0.661369	0.630043	0.722502	0.671616	0.722257
24.122	0.661369	0.630043	0.722502	0.671325	0.722047
24.133	0.661369	0.630043	0.722082	0.671325	0.722047
24.144	0.661369	0.630664	0.722082	0.671325	0.722047
24.155	0.661369	0.630664	0.722082	0.671325	0.722047
24.166	0.661369	0.630664	0.722082	0.671033	0.722047
24.176	0.661369	0.630664	0.722082	0.671033	0.722047
24.187	0.661369	0.630664	0.721662	0.671033	0.722047
24.198	0.661369	0.630664	0.721662	0.671033	0.722047
24.209	0.661369	0.630664	0.721662	0.670742	0.722047
24.22	0.661369	0.630664	0.721662	0.670742	0.722047
24.231	0.661369	0.630664	0.721662	0.670742	0.721838
24.242	0.661369	0.630664	0.721243	0.670742	0.721838
24.252	0.661369	0.630664	0.721243	0.670451	0.721838
24.263	0.661369	0.630664	0.721243	0.670451	0.721838
24.274	0.661369	0.630664	0.721243	0.670451	0.721838
24.285	0.661369	0.630664	0.720823	0.670451	0.721838
24.296	0.661369	0.630664	0.720823	0.67016	0.721838
24.307	0.661369	0.630664	0.720823	0.67016	0.721838
24.317	0.661369	0.630664	0.720823	0.67016	0.721838
24.328	0.66198	0.630664	0.720823	0.669869	0.721628
24.339	0.66198	0.630664	0.720403	0.669869	0.721628
24.35	0.66198	0.630664	0.720403	0.669869	0.721628
24.361	0.66198	0.630664	0.720403	0.669869	0.721628
24.372	0.66198	0.630664	0.720403	0.669578	0.721628
24.383	0.66198	0.630664	0.719983	0.669578	0.721628
24.393	0.66198	0.630664	0.719983	0.669578	0.721628
24.404	0.66198	0.630664	0.719983	0.669287	0.721418
24.415	0.66198	0.630664	0.719983	0.669287	0.721418
24.426	0.66198	0.630664	0.719983	0.669287	0.721418
24.437	0.66198	0.630664	0.719563	0.669287	0.721418
24.448	0.66198	0.630664	0.719563	0.668996	0.721418
24.459	0.66198	0.631285	0.719563	0.668996	0.721418
24.469	0.66198	0.631285	0.719563	0.668996	0.721418
24.48	0.66198	0.631285	0.719144	0.668705	0.721208
24.491	0.66198	0.631285	0.719144	0.668705	0.721208
24.502	0.66198	0.631285	0.719144	0.668705	0.721208
24.513	0.66198	0.631285	0.719144	0.668413	0.721208
24.524	0.66198	0.631285	0.718724	0.668413	0.721208
24.534	0.66198	0.631285	0.718724	0.668413	0.721208
24.545	0.662592	0.631285	0.718724	0.668413	0.721208
24.556	0.662592	0.631285	0.718724	0.668122	0.720999
24.567	0.662592	0.631285	0.718724	0.668122	0.720999
24.578	0.662592	0.631285	0.718304	0.668122	0.720999
24.589	0.662592	0.631285	0.718304	0.667831	0.720999
24.6	0.662592	0.631285	0.718304	0.667831	0.720999
24.61	0.662592	0.631285	0.718304	0.667831	0.720999
24.621	0.662592	0.631285	0.717884	0.66754	0.720789
24.632	0.662592	0.631285	0.717884	0.66754	0.720789
24.643	0.662592	0.631285	0.717884	0.66754	0.720789
24.654	0.662592	0.631285	0.717884	0.667249	0.720789
24.665	0.662592	0.631285	0.717464	0.667249	0.720789
24.675	0.662592	0.631906	0.717464	0.667249	0.720579
24.686	0.662592	0.631906	0.717464	0.666958	0.720579
24.697	0.662592	0.631906	0.717464	0.666958	0.720579
24.708	0.662592	0.631906	0.717464	0.666958	0.720579
24.719	0.662592	0.631906	0.717045	0.666667	0.720579
24.73	0.662592	0.631906	0.717045	0.666667	0.720369
24.741	0.663203	0.631906	0.717045	0.666667	0.720369
24.751	0.663203	0.631906	0.717045	0.666376	0.720369
24.762	0.663203	0.631906	0.716625	0.666376	0.720369
24.773	0.663203	0.631906	0.716625	0.666376	0.720369
24.784	0.663203	0.631906	0.716625	0.666084	0.720159
24.795	0.663203	0.631906	0.716625	0.666084	0.720159
24.806	0.663203	0.631906	0.716205	0.666084	0.720159
24.816	0.663203	0.631906	0.716205	0.665793	0.720159
24.827	0.663203	0.631906	0.716205	0.665793	0.720159
24.838	0.663203	0.632526	0.716205	0.665793	0.71995
24.849	0.663203	0.632526	0.715785	0.665502	0.71995
24.86	0.663203	0.632526	0.715785	0.665502	0.71995
24.871	0.663203	0.632526	0.715785	0.665502	0.71995
24.882	0.663203	0.632526	0.715785	0.665211	0.71974
24.892	0.663203	0.632526	0.715785	0.665211	0.71974
24.903	0.663203	0.632526	0.715365	0.66492	0.71974
24.914	0.663814	0.632526	0.715365	0.66492	0.71974
24.925	0.663814	0.632526	0.715365	0.66492	0.71953
24.936	0.663814	0.632526	0.715365	0.664629	0.71953
24.947	0.663814	0.632526	0.714945	0.664629	0.71953
24.958	0.663814	0.632526	0.714945	0.664629	0.71953
24.968	0.663814	0.632526	0.714945	0.664338	0.71932
24.979	0.663814	0.633147	0.714945	0.664338	0.71932
24.99	0.663814	0.633147	0.714526	0.664338	0.71932
25.001	0.663814	0.633147	0.714526	0.664047	0.71932
25.012	0.663814	0.633147	0.714526	0.664047	0.719111
25.023	0.663814	0.633147	0.714526	0.663755	0.719111
25.033	0.663814	0.633147	0.714106	0.663755	0.719111
25.044	0.663814	0.633147	0.714106	0.663755	0.719111
25.055	0.663814	0.633147	0.714106	0.663464	0.718901
25.066	0.663814	0.633147	0.714106	0.663464	0.718901
25.077	0.664425	0.633147	0.714106	0.663173	0.718901
25.088	0.664425	0.633147	0.713686	0.663173	0.718901
25.099	0.664425	0.633768	0.713686	0.663173	0.718691
25.109	0.664425	0.633768	0.713686	0.662882	0.718691
25.12	0.664425	0.633768	0.713686	0.662882	0.718691
25.131	0.664425	0.633768	0.713266	0.662591	0.718481
25.142	0.664425	0.633768	0.713266	0.662591	0.718481
25.153	0.664425	0.633768	0.713266	0.662591	0.718481
25.164	0.664425	0.633768	0.713266	0.6623	0.718481
25.174	0.664425	0.633768	0.712846	0.6623	0.718271
25.185	0.664425	0.633768	0.712846	0.6623	0.718271
25.196	0.664425	0.633768	0.712846	0.662009	0.718271
25.207	0.664425	0.634389	0.712846	0.662009	0.718062
25.218	0.665037	0.634389	0.712846	0.661718	0.718062
25.229	0.665037	0.634389	0.712427	0.661718	0.718062
25.24	0.665037	0.634389	0.712427	0.661426	0.717852
25.25	0.665037	0.634389	0.712427	0.661426	0.717852
25.261	0.665037	0.634389	0.712427	0.661426	0.717852
25.272	0.665037	0.634389	0.712007	0.661135	0.717642
25.283	0.665037	0.634389	0.712007	0.661135	0.717642
25.294	0.665037	0.634389	0.712007	0.660844	0.717642
25.305	0.665037	0.634389	0.712007	0.660844	0.717432
25.315	0.665037	0.635009	0.712007	0.660844	0.717432
25.326	0.665037	0.635009	0.711587	0.660553	0.717432
25.337	0.665037	0.635009	0.711587	0.660553	0.717223
25.348	0.665037	0.635009	0.711587	0.660262	0.717223
25.359	0.665648	0.635009	0.711587	0.660262	0.717223
25.37	0.665648	0.635009	0.711167	0.660262	0.717013
25.381	0.665648	0.635009	0.711167	0.659971	0.717013
25.391	0.665648	0.635009	0.711167	0.659971	0.717013
25.402	0.665648	0.63563	0.711167	0.65968	0.716803
25.413	0.665648	0.63563	0.710747	0.65968	0.716803
25.424	0.665648	0.63563	0.710747	0.659389	0.716803
25.435	0.665648	0.63563	0.710747	0.659389	0.716593
25.446	0.665648	0.63563	0.710747	0.659389	0.716593
25.457	0.665648	0.63563	0.710747	0.659098	0.716593
25.467	0.665648	0.63563	0.710327	0.659098	0.716383
25.478	0.665648	0.63563	0.710327	0.658806	0.716383
25.489	0.666259	0.636251	0.710327	0.658806	0.716174
25.5	0.666259	0.636251	0.710327	0.658515	0.716174
25.511	0.666259	0.636251	0.710327	0.658515	0.716174
25.522	0.666259	0.636251	0.709908	0.658515	0.715964
25.532	0.666259	0.636251	0.709908	0.658224	0.715964
25.543	0.666259	0.636251	0.709908	0.658224	0.715964
25.554	0.666259	0.636251	0.709908	0.657933	0.715754
25.565	0.666259	0.636872	0.709488	0.657933	0.715754
25.576	0.666259	0.636872	0.709488	0.657642	0.715544
25.587	0.666259	0.636872	0.709488	0.657642	0.715544
25.598	0.666259	0.636872	0.709488	0.657642	0.715544
25.608	0.66687	0.636872	0.709488	0.657351	0.715335
25.619	0.66687	0.636872	0.709068	0.657351	0.715335
25.63	0.66687	0.636872	0.709068	0.65706	0.715125
25.641	0.66687	0.637492	0.709068	0.65706	0.715125
25.652	0.66687	0.637492	0.709068	0.656769	0.715125
25.663	0.66687	0.637492	0.709068	0.656769	0.714915
25.673	0.66687	0.637492	0.708648	0.656769	0.714915
25.684	0.66687	0.637492	0.708648	0.656477	0.714705
25.695	0.66687	0.637492	0.708648	0.656477	0.714705
25.706	0.66687	0.638113	0.708648	0.656186	0.714495
25.717	0.66687	0.638113	0.708648	0.656186	0.714495
25.728	0.667482	0.638113	0.708228	0.655895	0.714495
25.739	0.667482	0.638113	0.708228	0.655895	0.714286
25.749	0.667482	0.638113	0.708228	0.655895	0.714286
25.76	0.667482	0.638113	0.708228	0.655604	0.714076
25.771	0.667482	0.638734	0.708228	0.655604	0.714076
25.782	0.667482	0.638734	0.707809	0.655313	0.713866
25.793	0.667482	0.638734	0.707809	0.655313	0.713866
25.804	0.667482	0.638734	0.707809	0.655313	0.713866
25.815	0.667482	0.638734	0.707809	0.655022	0.713656
25.825	0.667482	0.638734	0.707809	0.655022	0.713656
25.836	0.668093	0.639354	0.707389	0.654731	0.713447
25.847	0.668093	0.639354	0.707389	0.654731	0.713447
25.858	0.668093	0.639354	0.707389	0.65444	0.713237
25.869	0.668093	0.639354	0.707389	0.65444	0.713237
25.88	0.668093	0.639354	0.707389	0.65444	0.713027
25.89	0.668093	0.639354	0.706969	0.654148	0.713027
25.901	0.668093	0.639975	0.706969	0.654148	0.713027
25.912	0.668093	0.639975	0.706969	0.653857	0.712817
25.923	0.668093	0.639975	0.706969	0.653857	0.712817
25.934	0.668704	0.639975	0.706969	0.653857	0.712608
25.945	0.668704	0.639975	0.706969	0.653566	0.712608
25.956	0.668704	0.639975	0.706549	0.653566	0.712398
25.966	0.668704	0.640596	0.706549	0.653275	0.712398
25.977	0.668704	0.640596	0.706549	0.653275	0.712188
25.988	0.668704	0.640596	0.706549	0.653275	0.712188
25.999	0.668704	0.640596	0.706549	0.652984	0.711978
26.01	0.668704	0.640596	0.706129	0.652984	0.711978
26.021	0.669315	0.641217	0.706129	0.652693	0.711768
26.031	0.669315	0.641217	0.706129	0.652693	0.711768
26.042	0.669315	0.641217	0.706129	0.652693	0.711768
26.053	0.669315	0.641217	0.706129	0.652402	0.711559
26.064	0.669315	0.641217	0.706129	0.652402	0.711559
26.075	0.669315	0.641837	0.705709	0.652402	0.711349
26.086	0.669315	0.641837	0.705709	0.652111	0.711349
26.097	0.669315	0.641837	0.705709	0.652111	0.711139
26.107	0.669315	0.641837	0.705709	0.65182	0.711139
26.118	0.669927	0.641837	0.705709	0.65182	0.710929
26.129	0.669927	0.642458	0.705709	0.65182	0.710929
26.14	0.669927	0.642458	0.705709	0.651528	0.71072
26.151	0.669927	0.642458	0.70529	0.651528	0.71072
26.162	0.669927	0.642458	0.70529	0.651528	0.71051
26.172	0.669927	0.642458	0.70529	0.651237	0.71051
26.183	0.669927	0.643079	0.70529	0.651237	0.7103
26.194	0.670538	0.643079	0.70529	0.651237	0.7103
26.205	0.670538	0.643079	0.70529	0.650946	0.71009
26.216	0.670538	0.643079	0.70487	0.650946	0.71009
26.227	0.670538	0.643079	0.70487	0.650946	0.70988
26.238	0.670538	0.6437	0.70487	0.650655	0.70988
26.248	0.670538	0.6437	0.70487	0.650655	0.709671
26.259	0.670538	0.6437	0.70487	0.650655	0.709671
26.27	0.671149	0.6437	0.70487	0.650364	0.709461
26.281	0.671149	0.64432	0.70487	0.650364	0.709461
26.292	0.671149	0.64432	0.70487	0.650364	0.709251
26.303	0.671149	0.64432	0.70445	0.650073	0.709251
26.314	0.671149	0.64432	0.70445	0.650073	0.709041
26.324	0.671149	0.64432	0.70445	0.650073	0.709041
26.335	0.671149	0.644941	0.70445	0.649782	0.708832
26.346	0.67176	0.644941	0.70445	0.649782	0.708832
26.357	0.67176	0.644941	0.70445	0.649782	0.708622
26.368	0.67176	0.644941	0.70445	0.649491	0.708622
26.379	0.67176	0.645562	0.70445	0.649491	0.708412
26.389	0.67176	0.645562	0.70403	0.649491	0.708412
26.4	0.67176	0.645562	0.70403	0.649491	0.708202
26.411	0.672372	0.645562	0.70403	0.649199	0.708202
26.422	0.672372	0.646182	0.70403	0.649199	0.707992
26.433	0.672372	0.646182	0.70403	0.649199	0.707992
26.444	0.672372	0.646182	0.70403	0.649199	0.707783
26.455	0.672372	0.646182	0.70403	0.648908	0.707783
26.465	0.672372	0.646182	0.70403	0.648908	0.707573
26.476	0.672372	0.646803	0.70403	0.648908	0.707573
26.487	0.672983	0.646803	0.70361	0.648908	0.707363
26.498	0.672983	0.646803	0.70361	0.648617	0.707363
26.509	0.672983	0.646803	0.70361	0.648617	0.707153
26.52	0.672983	0.647424	0.70361	0.648617	0.707153
26.53	0.672983	0.647424	0.70361	0.648617	0.706944
26.541	0.673594	0.647424	0.70361	0.648326	0.706944
26.552	0.673594	0.647424	0.70361	0.648326	0.706734
26.563	0.673594	0.648045	0.70361	0.648326	0.706734
26.574	0.673594	0.648045	0.70361	0.648326	0.706524
26.585	0.673594	0.648045	0.70361	0.648326	0.706524
26.596	0.673594	0.648045	0.70361	0.648035	0.706314
26.606	0.674205	0.648665	0.703191	0.648035	0.706314
26.617	0.674205	0.648665	0.703191	0.648035	0.706104
26.628	0.674205	0.648665	0.703191	0.648035	0.706104
26.639	0.674205	0.648665	0.703191	0.648035	0.705895
26.65	0.674205	0.649286	0.703191	0.648035	0.705895
26.661	0.674205	0.649286	0.703191	0.647744	0.705685
26.671	0.674817	0.649286	0.703191	0.647744	0.705685
26.682	0.674817	0.649286	0.703191	0.647744	0.705475
26.693	0.674817	0.649907	0.703191	0.647744	0.705475
26.704	0.674817	0.649907	0.703191	0.647744	0.705265
26.715	0.674817	0.649907	0.703191	0.647744	0.705265
26.726	0.675428	0.650528	0.703191	0.647744	0.705056
26.737	0.675428	0.650528	0.703191	0.647453	0.705056
26.747	0.675428	0.650528	0.703191	0.647453	0.704846
26.758	0.675428	0.650528	0.703191	0.647453	0.704846
26.769	0.675428	0.651148	0.703191	0.647453	0.704636
26.78	0.676039	0.651148	0.703191	0.647453	0.704636
26.791	0.676039	0.651148	0.703191	0.647453	0.704426
26.802	0.676039	0.651148	0.702771	0.647453	0.704426
26.813	0.676039	0.651769	0.702771	0.647453	0.704216
26.823	0.676039	0.651769	0.702771	0.647453	0.704216
26.834	0.67665	0.651769	0.702771	0.647453	0.704007
26.845	0.67665	0.65239	0.702771	0.647453	0.704007
26.856	0.67665	0.65239	0.702771	0.647162	0.703797
26.867	0.67665	0.65239	0.702771	0.647162	0.703797
26.878	0.67665	0.65239	0.702771	0.647162	0.703587
26.888	0.677262	0.653011	0.702771	0.647162	0.703587
26.899	0.677262	0.653011	0.702771	0.647162	0.703377
26.91	0.677262	0.653011	0.702771	0.647162	0.703377
26.921	0.677262	0.653011	0.702771	0.647162	0.703168
26.932	0.677873	0.653631	0.702771	0.647162	0.703168
26.943	0.677873	0.653631	0.702771	0.647162	0.702958
26.954	0.677873	0.653631	0.702771	0.647162	0.702958
26.964	0.677873	0.654252	0.702771	0.647162	0.702748
26.975	0.677873	0.654252	0.702771	0.647162	0.702748
26.986	0.678484	0.654252	0.702771	0.647162	0.702538
26.997	0.678484	0.654252	0.702771	0.647162	0.702538
27.008	0.678484	0.654873	0.702771	0.647162	0.702329
27.019	0.678484	0.654873	0.702771	0.647162	0.702329
27.029	0.678484	0.654873	0.702771	0.647162	0.702119
27.04	0.679095	0.655493	0.702771	0.647162	0.702119
27.051	0.679095	0.655493	0.702771	0.647162	0.701909
27.062	0.679095	0.655493	0.702771	0.647162	0.701909
27.073	0.679095	0.656114	0.702771	0.647453	0.701699
27.084	0.679707	0.656114	0.702771	0.647453	0.701699
27.095	0.679707	0.656114	0.702771	0.647453	0.701489
27.105	0.679707	0.656114	0.702771	0.647453	0.701489
27.116	0.679707	0.656735	0.702771	0.647453	0.70128
27.127	0.680318	0.656735	0.702771	0.647453	0.70128
27.138	0.680318	0.656735	0.702771	0.647453	0.70107
27.149	0.680318	0.657356	0.702771	0.647453	0.70107
27.16	0.680318	0.657356	0.703191	0.647453	0.70086
27.17	0.680318	0.657356	0.703191	0.647453	0.70086
27.181	0.680929	0.657976	0.703191	0.647453	0.70065
27.192	0.680929	0.657976	0.703191	0.647744	0.70065
27.203	0.680929	0.657976	0.703191	0.647744	0.700441
27.214	0.680929	0.658597	0.703191	0.647744	0.700441
27.225	0.68154	0.658597	0.703191	0.647744	0.700231
27.236	0.68154	0.658597	0.703191	0.647744	0.700231
27.246	0.68154	0.658597	0.703191	0.647744	0.700021
27.257	0.68154	0.659218	0.703191	0.647744	0.700021
27.268	0.682152	0.659218	0.703191	0.648035	0.699811
27.279	0.682152	0.659218	0.703191	0.648035	0.699811
27.29	0.682152	0.659839	0.703191	0.648035	0.699601
27.301	0.682152	0.659839	0.703191	0.648035	0.699601
27.312	0.682763	0.659839	0.703191	0.648035	0.699392
27.322	0.682763	0.660459	0.703191	0.648035	0.699392
27.333	0.682763	0.660459	0.70361	0.648326	0.699182
27.344	0.682763	0.660459	0.70361	0.648326	0.699182
27.355	0.683374	0.66108	0.70361	0.648326	0.699182
27.366	0.683374	0.66108	0.70361	0.648326	0.698972
27.377	0.683374	0.66108	0.70361	0.648326	0.698972
27.387	0.683374	0.661701	0.70361	0.648617	0.698762
27.398	0.683985	0.661701	0.70361	0.648617	0.698762
27.409	0.683985	0.661701	0.70361	0.648617	0.698553
27.42	0.683985	0.662322	0.70361	0.648617	0.698553
27.431	0.683985	0.662322	0.70361	0.648908	0.698343
27.442	0.684597	0.662322	0.70361	0.648908	0.698343
27.453	0.684597	0.662942	0.70403	0.648908	0.698133
27.463	0.684597	0.662942	0.70403	0.648908	0.698133
27.474	0.684597	0.662942	0.70403	0.649199	0.697923
27.485	0.685208	0.663563	0.70403	0.649199	0.697923
27.496	0.685208	0.663563	0.70403	0.649199	0.697713
27.507	0.685208	0.663563	0.70403	0.649199	0.697713
27.518	0.685208	0.664184	0.70403	0.649491	0.697504
27.528	0.685819	0.664184	0.70403	0.649491	0.697504
27.539	0.685819	0.664184	0.70445	0.649491	0.697294
27.55	0.685819	0.664804	0.70445	0.649782	0.697294
27.561	0.68643	0.664804	0.70445	0.649782	0.697294
27.572	0.68643	0.664804	0.70445	0.649782	0.697084
27.583	0.68643	0.665425	0.70445	0.650073	0.697084
27.594	0.68643	0.665425	0.70445	0.650073	0.696874
27.604	0.687042	0.665425	0.70445	0.650073	0.696874
27.615	0.687042	0.666046	0.70445	0.650364	0.696665
27.626	0.687042	0.666046	0.70487	0.650364	0.696665
27.637	0.687042	0.666667	0.70487	0.650364	0.696455
27.648	0.687653	0.666667	0.70487	0.650655	0.696455
27.659	0.687653	0.666667	0.70487	0.650655	0.696245
27.669	0.687653	0.667287	0.70487	0.650655	0.696245
27.68	0.688264	0.667287	0.70487	0.650946	0.696035
27.691	0.688264	0.667287	0.70529	0.650946	0.696035
27.702	0.688264	0.667908	0.70529	0.650946	0.696035
27.713	0.688264	0.667908	0.70529	0.651237	0.695825
27.724	0.688875	0.667908	0.70529	0.651237	0.695825
27.735	0.688875	0.668529	0.70529	0.651237	0.695616
27.745	0.688875	0.668529	0.70529	0.651528	0.695616
27.756	0.688875	0.668529	0.705709	0.651528	0.695406
27.767	0.689487	0.66915	0.705709	0.65182	0.695406
27.778	0.689487	0.66915	0.705709	0.65182	0.695196
27.789	0.689487	0.66977	0.705709	0.65182	0.695196
27.8	0.690098	0.66977	0.705709	0.652111	0.694986
27.811	0.690098	0.66977	0.706129	0.652111	0.694986
27.821	0.690098	0.670391	0.706129	0.652111	0.694986
27.832	0.690098	0.670391	0.706129	0.652402	0.694777
27.843	0.690709	0.670391	0.706129	0.652402	0.694777
27.854	0.690709	0.671012	0.706129	0.652693	0.694567
27.865	0.690709	0.671012	0.706129	0.652693	0.694567
27.876	0.69132	0.671012	0.706549	0.652984	0.694357
27.886	0.69132	0.671633	0.706549	0.652984	0.694357
27.897	0.69132	0.671633	0.706549	0.652984	0.694147
27.908	0.69132	0.672253	0.706549	0.653275	0.694147
27.919	0.691932	0.672253	0.706969	0.653275	0.694147
27.93	0.691932	0.672253	0.706969	0.653566	0.693937
27.941	0.691932	0.672874	0.706969	0.653566	0.693937
27.952	0.692543	0.672874	0.706969	0.653857	0.693728
27.962	0.692543	0.672874	0.706969	0.653857	0.693728
27.973	0.692543	0.673495	0.707389	0.653857	0.693518
27.984	0.692543	0.673495	0.707389	0.654148	0.693518
27.995	0.693154	0.674115	0.707389	0.654148	0.693308
28.006	0.693154	0.674115	0.707389	0.65444	0.693308
28.017	0.693154	0.674115	0.707809	0.65444	0.693308
28.027	0.693765	0.674736	0.707809	0.654731	0.693098
28.038	0.693765	0.674736	0.707809	0.654731	0.693098
28.049	0.693765	0.674736	0.707809	0.655022	0.692889
28.06	0.693765	0.675357	0.708228	0.655022	0.692889
28.071	0.694377	0.675357	0.708228	0.655313	0.692679
28.082	0.694377	0.675978	0.708228	0.655313	0.692679
28.093	0.694377	0.675978	0.708228	0.655604	0.692679
28.103	0.694988	0.675978	0.708648	0.655604	0.692469
28.114	0.694988	0.676598	0.708648	0.655895	0.692469
28.125	0.694988	0.676598	0.708648	0.655895	0.692259
28.136	0.694988	0.676598	0.708648	0.656186	0.692259
28.147	0.695599	0.677219	0.709068	0.656186	0.69205
28.158	0.695599	0.677219	0.709068	0.656477	0.69205
28.169	0.695599	0.67784	0.709068	0.656477	0.69205
28.179	0.69621	0.67784	0.709068	0.656769	0.69184
28.19	0.69621	0.67784	0.709488	0.656769	0.69184
28.201	0.69621	0.678461	0.709488	0.65706	0.69163
28.212	0.696822	0.678461	0.709488	0.65706	0.69163
28.223	0.696822	0.679081	0.709908	0.657351	0.69163
28.234	0.696822	0.679081	0.709908	0.657351	0.69142
28.244	0.697433	0.679081	0.709908	0.657642	0.69142
28.255	0.697433	0.679702	0.709908	0.657642	0.69121
28.266	0.697433	0.679702	0.710327	0.657933	0.69121
28.277	0.697433	0.679702	0.710327	0.657933	0.69121
28.288	0.698044	0.680323	0.710327	0.658224	0.691001
28.299	0.698044	0.680323	0.710747	0.658224	0.691001
28.31	0.698044	0.680944	0.710747	0.658515	0.690791
28.32	0.698655	0.680944	0.710747	0.658515	0.690791
28.331	0.698655	0.680944	0.711167	0.658806	0.690791
28.342	0.698655	0.681564	0.711167	0.658806	0.690581
28.353	0.699267	0.681564	0.711167	0.659098	0.690581
28.364	0.699267	0.682185	0.711587	0.659098	0.690371
28.375	0.699267	0.682185	0.711587	0.659389	0.690371
28.385	0.699878	0.682185	0.711587	0.65968	0.690371
28.396	0.699878	0.682806	0.712007	0.65968	0.690162
28.407	0.699878	0.682806	0.712007	0.659971	0.690162
28.418	0.699878	0.683426	0.712007	0.659971	0.689952
28.429	0.700489	0.683426	0.712427	0.660262	0.689952
28.44	0.700489	0.683426	0.712427	0.660262	0.689952
28.451	0.700489	0.684047	0.712427	0.660553	0.689742
28.461	0.7011	0.684047	0.712846	0.660553	0.689742
28.472	0.7011	0.684668	0.712846	0.660844	0.689742
28.483	0.7011	0.684668	0.712846	0.660844	0.689532
28.494	0.701711	0.684668	0.713266	0.661135	0.689532
28.505	0.701711	0.685289	0.713266	0.661426	0.689322
28.516	0.701711	0.685289	0.713266	0.661426	0.689322
28.526	0.702323	0.685909	0.713686	0.661718	0.689322
28.537	0.702323	0.685909	0.713686	0.661718	0.689113
28.548	0.702323	0.685909	0.713686	0.662009	0.689113
28.559	0.702934	0.68653	0.714106	0.662009	0.689113
28.57	0.702934	0.68653	0.714106	0.6623	0.688903
28.581	0.702934	0.687151	0.714106	0.6623	0.688903
28.592	0.703545	0.687151	0.714526	0.662591	0.688903
28.602	0.703545	0.687151	0.714526	0.662882	0.688693
28.613	0.703545	0.687772	0.714945	0.662882	0.688693
28.624	0.704156	0.687772	0.714945	0.663173	0.688693
28.635	0.704156	0.688392	0.714945	0.663173	0.688483
28.646	0.704156	0.688392	0.715365	0.663464	0.688483
28.657	0.704768	0.688392	0.715365	0.663464	0.688483
28.668	0.704768	0.689013	0.715365	0.663755	0.688274
28.678	0.704768	0.689013	0.715785	0.664047	0.688274
28.689	0.705379	0.689634	0.715785	0.664047	0.688274
28.7	0.705379	0.689634	0.716205	0.664338	0.688064
28.711	0.705379	0.689634	0.716205	0.664338	0.688064
28.722	0.70599	0.690255	0.716205	0.664629	0.688064
28.733	0.70599	0.690255	0.716625	0.664629	0.687854
28.743	0.70599	0.690875	0.716625	0.66492	0.687854
28.754	0.706601	0.690875	0.717045	0.665211	0.687854
28.765	0.706601	0.690875	0.717045	0.665211	0.687644
28.776	0.706601	0.691496	0.717045	0.665502	0.687644
28.787	0.707213	0.691496	0.717464	0.665502	0.687644
28.798	0.707213	0.692117	0.717464	0.665793	0.687434
28.809	0.707213	0.692117	0.717884	0.665793	0.687434
28.819	0.707824	0.692117	0.717884	0.666084	0.687434
28.83	0.707824	0.692737	0.717884	0.666376	0.687225
28.841	0.707824	0.692737	0.718304	0.666376	0.687225
28.852	0.708435	0.693358	0.718304	0.666667	0.687225
28.863	0.708435	0.693358	0.718724	0.666667	0.687015
28.874	0.709046	0.693979	0.718724	0.666958	0.687015
28.884	0.709046	0.693979	0.719144	0.667249	0.687015
28.895	0.709046	0.693979	0.719144	0.667249	0.687015
28.906	0.709658	0.6946	0.719144	0.66754	0.686805
28.917	0.709658	0.6946	0.719563	0.66754	0.686805
28.928	0.709658	0.69522	0.719563	0.667831	0.686805
28.939	0.710269	0.69522	0.719983	0.668122	0.686595
28.95	0.710269	0.69522	0.719983	0.668122	0.686595
28.96	0.710269	0.695841	0.720403	0.668413	0.686595
28.971	0.71088	0.695841	0.720403	0.668413	0.686595
28.982	0.71088	0.696462	0.720403	0.668705	0.686386
28.993	0.71088	0.696462	0.720823	0.668705	0.686386
29.004	0.711491	0.697083	0.720823	0.668996	0.686386
29.015	0.711491	0.697083	0.721243	0.669287	0.686176
29.025	0.712103	0.697083	0.721243	0.669287	0.686176
29.036	0.712103	0.697703	0.721662	0.669578	0.686176
29.047	0.712103	0.697703	0.721662	0.669578	0.686176
29.058	0.712714	0.698324	0.722082	0.669869	0.685966
29.069	0.712714	0.698324	0.722082	0.67016	0.685966
29.08	0.712714	0.698324	0.722502	0.67016	0.685966
29.091	0.713325	0.698945	0.722502	0.670451	0.685966
29.101	0.713325	0.698945	0.722502	0.670451	0.685756
29.112	0.713325	0.699565	0.722922	0.670742	0.685756
29.123	0.713936	0.699565	0.722922	0.671033	0.685756
29.134	0.713936	0.700186	0.723342	0.671033	0.685546
29.145	0.714548	0.700186	0.723342	0.671325	0.685546
29.156	0.714548	0.700186	0.723762	0.671325	0.685546
29.167	0.714548	0.700807	0.723762	0.671616	0.685546
29.177	0.715159	0.700807	0.724181	0.671907	0.685337
29.188	0.715159	0.701428	0.724181	0.671907	0.685337
29.199	0.715159	0.701428	0.724601	0.672198	0.685337
29.21	0.71577	0.702048	0.724601	0.672489	0.685337
29.221	0.71577	0.702048	0.725021	0.672489	0.685127
29.232	0.716381	0.702048	0.725021	0.67278	0.685127
29.242	0.716381	0.702669	0.725441	0.67278	0.685127
29.253	0.716381	0.702669	0.725441	0.673071	0.685127
29.264	0.716993	0.70329	0.725861	0.673362	0.684917
29.275	0.716993	0.70329	0.725861	0.673362	0.684917
29.286	0.716993	0.70329	0.72628	0.673654	0.684917
29.297	0.717604	0.703911	0.72628	0.673654	0.684917
29.308	0.717604	0.703911	0.7267	0.673945	0.684707
29.318	0.718215	0.704531	0.7267	0.674236	0.684707
29.329	0.718215	0.704531	0.72712	0.674236	0.684707
29.34	0.718215	0.705152	0.72712	0.674527	0.684707
29.351	0.718826	0.705152	0.72754	0.674527	0.684707
29.362	0.718826	0.705152	0.72754	0.674818	0.684498
29.373	0.719438	0.705773	0.72796	0.675109	0.684498
29.383	0.719438	0.705773	0.72796	0.675109	0.684498
29.394	0.719438	0.706394	0.72838	0.6754	0.684498
29.405	0.720049	0.706394	0.72838	0.6754	0.684288
29.416	0.720049	0.707014	0.728799	0.675691	0.684288
29.427	0.720049	0.707014	0.728799	0.675983	0.684288
29.438	0.72066	0.707014	0.729219	0.675983	0.684288
29.449	0.72066	0.707635	0.729219	0.676274	0.684078
29.459	0.721271	0.707635	0.729639	0.676274	0.684078
29.47	0.721271	0.708256	0.729639	0.676565	0.684078
29.481	0.721271	0.708256	0.730059	0.676856	0.684078
29.492	0.721883	0.708876	0.730059	0.676856	0.684078
29.503	0.721883	0.708876	0.730479	0.677147	0.683868
29.514	0.721883	0.708876	0.730479	0.677438	0.683868
29.524	0.722494	0.709497	0.730898	0.677438	0.683868
29.535	0.722494	0.709497	0.730898	0.677729	0.683868
29.546	0.723105	0.710118	0.731318	0.677729	0.683658
29.557	0.723105	0.710118	0.731318	0.67802	0.683658
29.568	0.723105	0.710739	0.731738	0.678311	0.683658
29.579	0.723716	0.710739	0.731738	0.678311	0.683658
29.59	0.723716	0.711359	0.732158	0.678603	0.683658
29.6	0.724328	0.711359	0.732158	0.678603	0.683449
29.611	0.724328	0.711359	0.732578	0.678894	0.683449
29.622	0.724328	0.71198	0.732997	0.679185	0.683449
29.633	0.724939	0.71198	0.732997	0.679185	0.683449
29.644	0.724939	0.712601	0.733417	0.679476	0.683239
29.655	0.724939	0.712601	0.733417	0.679476	0.683239
29.666	0.72555	0.713222	0.733837	0.679767	0.683239
29.676	0.72555	0.713222	0.733837	0.680058	0.683239
29.687	0.726161	0.713222	0.734257	0.680058	0.683029
29.698	0.726161	0.713842	0.734257	0.680349	0.683029
29.709	0.726161	0.713842	0.734677	0.680349	0.683029
29.72	0.726773	0.714463	0.734677	0.68064	0.683029
29.731	0.726773	0.714463	0.735097	0.68064	0.683029
29.741	0.726773	0.715084	0.735097	0.680932	0.682819
29.752	0.727384	0.715084	0.735516	0.681223	0.682819
29.763	0.727384	0.715705	0.735936	0.681223	0.682819
29.774	0.727995	0.715705	0.735936	0.681514	0.682819
29.785	0.727995	0.715705	0.736356	0.681514	0.68261
29.796	0.727995	0.716325	0.736356	0.681805	0.68261
29.807	0.728606	0.716325	0.736776	0.682096	0.68261
29.817	0.728606	0.716946	0.736776	0.682096	0.68261
29.828	0.729218	0.716946	0.737196	0.682387	0.68261
29.839	0.729218	0.717567	0.737196	0.682387	0.6824
29.85	0.729218	0.717567	0.737615	0.682678	0.6824
29.861	0.729829	0.717567	0.738035	0.682678	0.6824
29.872	0.729829	0.718187	0.738035	0.682969	0.6824
29.882	0.729829	0.718187	0.738455	0.683261	0.68219
29.893	0.73044	0.718808	0.738455	0.683261	0.68219
29.904	0.73044	0.718808	0.738875	0.683552	0.68219
29.915	0.731051	0.719429	0.738875	0.683552	0.68219
29.926	0.731051	0.719429	0.739295	0.683843	0.68219
29.937	0.731051	0.72005	0.739715	0.683843	0.68198
29.948	0.731663	0.72005	0.739715	0.684134	0.68198
29.958	0.731663	0.72005	0.740134	0.684425	0.68198
29.969	0.731663	0.72067	0.740134	0.684425	0.68198
29.98	0.732274	0.72067	0.740554	0.684716	0.681771
29.991	0.732274	0.721291	0.740554	0.684716	0.681771
30.002	0.732885	0.721291	0.740974	0.685007	0.681771
30.013	0.732885	0.721912	0.741394	0.685007	0.681771
30.024	0.732885	0.721912	0.741394	0.685298	0.681561
30.034	0.733496	0.721912	0.741814	0.685298	0.681561
30.045	0.733496	0.722533	0.741814	0.68559	0.681561
30.056	0.733496	0.722533	0.742233	0.68559	0.681561
30.067	0.734108	0.723153	0.742233	0.685881	0.681351
30.078	0.734108	0.723153	0.742653	0.685881	0.681351
30.089	0.734108	0.723774	0.743073	0.686172	0.681351
30.099	0.734719	0.723774	0.743073	0.686463	0.681351
30.11	0.734719	0.724395	0.743493	0.686463	0.681141
30.121	0.73533	0.724395	0.743493	0.686754	0.681141
30.132	0.73533	0.724395	0.743913	0.686754	0.681141
30.143	0.73533	0.725016	0.743913	0.687045	0.681141
30.154	0.735941	0.725016	0.744332	0.687045	0.680931
30.165	0.735941	0.725636	0.744752	0.687336	0.680931
30.175	0.735941	0.725636	0.744752	0.687336	0.680931
30.186	0.736553	0.726257	0.745172	0.687627	0.680931
30.197	0.736553	0.726257	0.745172	0.687627	0.680722
30.208	0.736553	0.726257	0.745592	0.687918	0.680722
30.219	0.737164	0.726878	0.745592	0.687918	0.680722
30.23	0.737164	0.726878	0.746012	0.68821	0.680722
30.24	0.737775	0.727498	0.746432	0.68821	0.680512
30.251	0.737775	0.727498	0.746432	0.688501	0.680512
30.262	0.737775	0.728119	0.746851	0.688501	0.680512
30.273	0.738386	0.728119	0.746851	0.688792	0.680512
30.284	0.738386	0.728119	0.747271	0.688792	0.680302
30.295	0.738386	0.72874	0.747271	0.689083	0.680302
30.306	0.738998	0.72874	0.747691	0.689083	0.680302
30.316	0.738998	0.729361	0.748111	0.689374	0.680092
30.327	0.738998	0.729361	0.748111	0.689374	0.680092
30.338	0.739609	0.729981	0.748531	0.689665	0.680092
30.349	0.739609	0.729981	0.748531	0.689665	0.680092
30.36	0.739609	0.729981	0.74895	0.689665	0.679883
30.371	0.74022	0.730602	0.74895	0.689956	0.679883
30.381	0.74022	0.730602	0.74937	0.689956	0.679883
30.392	0.74022	0.731223	0.74979	0.690247	0.679673
30.403	0.740831	0.731223	0.74979	0.690247	0.679673
30.414	0.740831	0.731844	0.75021	0.690539	0.679673
30.425	0.740831	0.731844	0.75021	0.690539	0.679673
30.436	0.741443	0.731844	0.75063	0.69083	0.679463
30.447	0.741443	0.732464	0.75105	0.69083	0.679463
30.457	0.741443	0.732464	0.75105	0.69083	0.679463
30.468	0.742054	0.733085	0.751469	0.691121	0.679253
30.479	0.742054	0.733085	0.751469	0.691121	0.679253
30.49	0.742054	0.733706	0.751889	0.691412	0.679253
30.501	0.742665	0.733706	0.751889	0.691412	0.679043
30.512	0.742665	0.733706	0.752309	0.691703	0.679043
30.523	0.742665	0.734327	0.752729	0.691703	0.679043
30.533	0.743276	0.734327	0.752729	0.691703	0.679043
30.544	0.743276	0.734947	0.753149	0.691994	0.678834
30.555	0.743276	0.734947	0.753149	0.691994	0.678834
30.566	0.743888	0.734947	0.753568	0.692285	0.678834
30.577	0.743888	0.735568	0.753568	0.692285	0.678624
30.588	0.743888	0.735568	0.753988	0.692285	0.678624
30.598	0.744499	0.736189	0.754408	0.692576	0.678624
30.609	0.744499	0.736189	0.754408	0.692576	0.678414
30.62	0.744499	0.736809	0.754828	0.692868	0.678414
30.631	0.74511	0.736809	0.754828	0.692868	0.678414
30.642	0.74511	0.736809	0.755248	0.692868	0.678204
30.653	0.74511	0.73743	0.755248	0.693159	0.678204
30.664	0.745721	0.73743	0.755668	0.693159	0.678204
30.674	0.745721	0.738051	0.755668	0.693159	0.677995
30.685	0.745721	0.738051	0.756087	0.69345	0.677995
30.696	0.746333	0.738051	0.756507	0.69345	0.677995
30.707	0.746333	0.738672	0.756507	0.693741	0.677785
30.718	0.746333	0.738672	0.756927	0.693741	0.677785
30.729	0.746944	0.739292	0.756927	0.693741	0.677575
30.739	0.746944	0.739292	0.757347	0.694032	0.677575
30.75	0.746944	0.739292	0.757347	0.694032	0.677575
30.761	0.747555	0.739913	0.757767	0.694032	0.677365
30.772	0.747555	0.739913	0.758186	0.694323	0.677365
30.783	0.747555	0.740534	0.758186	0.694323	0.677365
30.794	0.747555	0.740534	0.758606	0.694323	0.677155
30.805	0.748166	0.740534	0.758606	0.694614	0.677155
30.815	0.748166	0.741155	0.759026	0.694614	0.677155
30.826	0.748166	0.741155	0.759026	0.694614	0.676946
30.837	0.748778	0.741775	0.759446	0.694614	0.676946
30.848	0.748778	0.741775	0.759446	0.694905	0.676736
30.859	0.748778	0.741775	0.759866	0.694905	0.676736
30.87	0.748778	0.742396	0.759866	0.694905	0.676736
30.88	0.749389	0.742396	0.760285	0.695197	0.676526
30.891	0.749389	0.742396	0.760705	0.695197	0.676526
30.902	0.749389	0.743017	0.760705	0.695197	0.676526
30.913	0.75	0.743017	0.761125	0.695488	0.676316
30.924	0.75	0.743637	0.761125	0.695488	0.676316
30.935	0.75	0.743637	0.761545	0.695488	0.676107
30.946	0.750611	0.743637	0.761545	0.695488	0.676107
30.956	0.750611	0.744258	0.761965	0.695779	0.676107
30.967	0.750611	0.744258	0.761965	0.695779	0.675897
30.978	0.750611	0.744258	0.762385	0.695779	0.675897
30.989	0.751222	0.744879	0.762385	0.695779	0.675687
31	0.751222	0.744879	0.762804	0.69607	0.675687
31.011	0.751222	0.7455	0.762804	0.69607	0.675687
31.022	0.751222	0.7455	0.763224	0.69607	0.675477
31.032	0.751834	0.7455	0.763224	0.69607	0.675477
31.043	0.751834	0.74612	0.763644	0.696361	0.675267
31.054	0.751834	0.74612	0.763644	0.696361	0.675267
31.065	0.752445	0.74612	0.764064	0.696361	0.675267
31.076	0.752445	0.746741	0.764064	0.696361	0.675058
31.087	0.752445	0.746741	0.764484	0.696361	0.675058
31.097	0.752445	0.747362	0.764484	0.696652	0.674848
31.108	0.753056	0.747362	0.764903	0.696652	0.674848
31.119	0.753056	0.747362	0.764903	0.696652	0.674638
31.13	0.753056	0.747983	0.765323	0.696652	0.674638
31.141	0.753056	0.747983	0.765323	0.696652	0.674638
31.152	0.753667	0.747983	0.765743	0.696943	0.674428
31.163	0.753667	0.748603	0.765743	0.696943	0.674428
31.173	0.753667	0.748603	0.766163	0.696943	0.674219
31.184	0.753667	0.748603	0.766163	0.696943	0.674219
31.195	0.754279	0.749224	0.766583	0.696943	0.674009
31.206	0.754279	0.749224	0.766583	0.697234	0.674009
31.217	0.754279	0.749224	0.767003	0.697234	0.673799
31.228	0.754279	0.749845	0.767003	0.697234	0.673799
31.238	0.75489	0.749845	0.767422	0.697234	0.673799
31.249	0.75489	0.750466	0.767422	0.697234	0.673589
31.26	0.75489	0.750466	0.767842	0.697234	0.673589
31.271	0.75489	0.750466	0.767842	0.697234	0.673379
31.282	0.755501	0.751086	0.768262	0.697525	0.673379
31.293	0.755501	0.751086	0.768262	0.697525	0.67317
31.304	0.755501	0.751086	0.768682	0.697525	0.67317
31.314	0.755501	0.751707	0.768682	0.697525	0.67296
31.325	0.756112	0.751707	0.769102	0.697525	0.67296
31.336	0.756112	0.751707	0.769102	0.697525	0.67275
31.347	0.756112	0.752328	0.769102	0.697525	0.67275
31.358	0.756112	0.752328	0.769521	0.697525	0.67275
31.369	0.756724	0.752328	0.769521	0.697817	0.67254
31.379	0.756724	0.752948	0.769941	0.697817	0.67254
31.39	0.756724	0.752948	0.769941	0.697817	0.672331
31.401	0.756724	0.752948	0.770361	0.697817	0.672331
31.412	0.756724	0.753569	0.770361	0.697817	0.672121
31.423	0.757335	0.753569	0.770361	0.697817	0.672121
31.434	0.757335	0.753569	0.770781	0.697817	0.671911
31.445	0.757335	0.75419	0.770781	0.697817	0.671911
31.455	0.757335	0.75419	0.771201	0.697817	0.671701
31.466	0.757335	0.75419	0.771201	0.697817	0.671701
31.477	0.757946	0.75419	0.77162	0.697817	0.671492
31.488	0.757946	0.754811	0.77162	0.697817	0.671492
31.499	0.757946	0.754811	0.77162	0.698108	0.671282
31.51	0.757946	0.754811	0.77204	0.698108	0.671282
31.521	0.758557	0.755431	0.77204	0.698108	0.671072
31.531	0.758557	0.755431	0.77204	0.698108	0.671072
31.542	0.758557	0.755431	0.77246	0.698108	0.670862
31.553	0.758557	0.756052	0.77246	0.698108	0.670862
31.564	0.758557	0.756052	0.77288	0.698108	0.670652
31.575	0.759169	0.756052	0.77288	0.698108	0.670652
31.586	0.759169	0.756673	0.77288	0.698108	0.670443
31.596	0.759169	0.756673	0.7733	0.698108	0.670443
31.607	0.759169	0.756673	0.7733	0.698108	0.670233
31.618	0.759169	0.757294	0.7733	0.698108	0.670233
31.629	0.75978	0.757294	0.77372	0.698108	0.670023
31.64	0.75978	0.757294	0.77372	0.698108	0.670023
31.651	0.75978	0.757294	0.774139	0.698108	0.669813
31.662	0.75978	0.757914	0.774139	0.698108	0.669813
31.672	0.75978	0.757914	0.774139	0.698108	0.669604
31.683	0.75978	0.757914	0.774559	0.698108	0.669604
31.694	0.760391	0.758535	0.774559	0.698108	0.669394
31.705	0.760391	0.758535	0.774559	0.698108	0.669394
31.716	0.760391	0.758535	0.774979	0.698108	0.669184
31.727	0.760391	0.758535	0.774979	0.698108	0.669184
31.737	0.760391	0.759156	0.774979	0.698108	0.668974
31.748	0.761002	0.759156	0.774979	0.698108	0.668764
31.759	0.761002	0.759156	0.775399	0.698108	0.668764
31.77	0.761002	0.759777	0.775399	0.698108	0.668555
31.781	0.761002	0.759777	0.775399	0.698108	0.668555
31.792	0.761002	0.759777	0.775819	0.698108	0.668345
31.803	0.761002	0.759777	0.775819	0.698108	0.668345
31.813	0.761002	0.760397	0.775819	0.698108	0.668135
31.824	0.761614	0.760397	0.776238	0.698108	0.668135
31.835	0.761614	0.760397	0.776238	0.697817	0.667925
31.846	0.761614	0.760397	0.776238	0.697817	0.667925
31.857	0.761614	0.761018	0.776238	0.697817	0.667716
31.868	0.761614	0.761018	0.776658	0.697817	0.667506
31.879	0.761614	0.761018	0.776658	0.697817	0.667506
31.889	0.762225	0.761639	0.776658	0.697817	0.667296
31.9	0.762225	0.761639	0.776658	0.697817	0.667296
31.911	0.762225	0.761639	0.777078	0.697817	0.667086
31.922	0.762225	0.761639	0.777078	0.697817	0.667086
31.933	0.762225	0.762259	0.777078	0.697817	0.666876
31.944	0.762225	0.762259	0.777078	0.697817	0.666667
31.954	0.762225	0.762259	0.777498	0.697817	0.666667
31.965	0.762836	0.762259	0.777498	0.697817	0.666457
31.976	0.762836	0.76288	0.777498	0.697525	0.666457
31.987	0.762836	0.76288	0.777498	0.697525	0.666247
31.998	0.762836	0.76288	0.777498	0.697525	0.666037
32.009	0.762836	0.76288	0.777918	0.697525	0.666037
32.02	0.762836	0.763501	0.777918	0.697525	0.665828
32.03	0.762836	0.763501	0.777918	0.697525	0.665828
32.041	0.762836	0.763501	0.777918	0.697525	0.665618
32.052	0.763447	0.763501	0.777918	0.697525	0.665408
32.063	0.763447	0.764122	0.778338	0.697234	0.665408
32.074	0.763447	0.764122	0.778338	0.697234	0.665198
32.085	0.763447	0.764122	0.778338	0.697234	0.665198
32.095	0.763447	0.764122	0.778338	0.697234	0.664988
32.106	0.763447	0.764742	0.778338	0.697234	0.664779
32.117	0.763447	0.764742	0.778757	0.697234	0.664779
32.128	0.763447	0.764742	0.778757	0.697234	0.664569
32.139	0.763447	0.764742	0.778757	0.696943	0.664569
32.15	0.764059	0.764742	0.778757	0.696943	0.664359
32.161	0.764059	0.765363	0.778757	0.696943	0.664149
32.171	0.764059	0.765363	0.778757	0.696943	0.664149
32.182	0.764059	0.765363	0.778757	0.696943	0.66394
32.193	0.764059	0.765363	0.779177	0.696943	0.66373
32.204	0.764059	0.765984	0.779177	0.696652	0.66373
32.215	0.764059	0.765984	0.779177	0.696652	0.66352
32.226	0.764059	0.765984	0.779177	0.696652	0.66352
32.236	0.764059	0.765984	0.779177	0.696652	0.66331
32.247	0.764059	0.765984	0.779177	0.696652	0.6631
32.258	0.764059	0.766605	0.779177	0.696652	0.6631
32.269	0.764059	0.766605	0.779177	0.696361	0.662891
32.28	0.76467	0.766605	0.779177	0.696361	0.662681
32.291	0.76467	0.766605	0.779597	0.696361	0.662681
32.302	0.76467	0.766605	0.779597	0.696361	0.662471
32.312	0.76467	0.767225	0.779597	0.696361	0.662261
32.323	0.76467	0.767225	0.779597	0.69607	0.662261
32.334	0.76467	0.767225	0.779597	0.69607	0.662052
32.345	0.76467	0.767225	0.779597	0.69607	0.661842
32.356	0.76467	0.767225	0.779597	0.69607	0.661842
32.367	0.76467	0.767846	0.779597	0.695779	0.661632
32.378	0.76467	0.767846	0.779597	0.695779	0.661422
32.388	0.76467	0.767846	0.779597	0.695779	0.661422
32.399	0.76467	0.767846	0.779597	0.695779	0.661213
32.41	0.76467	0.767846	0.779597	0.695488	0.661003
32.421	0.76467	0.767846	0.779597	0.695488	0.661003
32.432	0.76467	0.768467	0.779597	0.695488	0.660793
32.443	0.76467	0.768467	0.779597	0.695488	0.660583
32.453	0.76467	0.768467	0.780017	0.695197	0.660373
32.464	0.76467	0.768467	0.780017	0.695197	0.660373
32.475	0.765281	0.768467	0.780017	0.695197	0.660164
32.486	0.765281	0.769088	0.780017	0.695197	0.659954
32.497	0.765281	0.769088	0.780017	0.694905	0.659954
32.508	0.765281	0.769088	0.780017	0.694905	0.659744
32.519	0.765281	0.769088	0.780017	0.694905	0.659534
32.529	0.765281	0.769088	0.780017	0.694905	0.659325
32.54	0.765281	0.769088	0.780017	0.694614	0.659325
32.551	0.765281	0.769088	0.780017	0.694614	0.659115
32.562	0.765281	0.769708	0.780017	0.694614	0.658905
32.573	0.765281	0.769708	0.780017	0.694323	0.658905
32.584	0.765281	0.769708	0.780017	0.694323	0.658695
32.594	0.765281	0.769708	0.780017	0.694323	0.658485
32.605	0.765281	0.769708	0.780017	0.694323	0.658276
32.616	0.765281	0.769708	0.779597	0.694032	0.658276
32.627	0.765281	0.770329	0.779597	0.694032	0.658066
32.638	0.765281	0.770329	0.779597	0.694032	0.657856
32.649	0.765281	0.770329	0.779597	0.693741	0.657646
32.66	0.765281	0.770329	0.779597	0.693741	0.657646
32.67	0.765281	0.770329	0.779597	0.693741	0.657437
32.681	0.765281	0.770329	0.779597	0.69345	0.657227
32.692	0.765281	0.770329	0.779597	0.69345	0.657017
32.703	0.765281	0.770329	0.779597	0.69345	0.657017
32.714	0.765281	0.77095	0.779597	0.693159	0.656807
32.725	0.765281	0.77095	0.779597	0.693159	0.656597
32.735	0.765281	0.77095	0.779597	0.693159	0.656388
32.746	0.765281	0.77095	0.779597	0.692868	0.656388
32.757	0.765281	0.77095	0.779597	0.692868	0.656178
32.768	0.765281	0.77095	0.779597	0.692868	0.655968
32.779	0.765281	0.77095	0.779597	0.692576	0.655758
32.79	0.76467	0.77095	0.779177	0.692576	0.655549
32.801	0.76467	0.77157	0.779177	0.692285	0.655549
32.811	0.76467	0.77157	0.779177	0.692285	0.655339
32.822	0.76467	0.77157	0.779177	0.692285	0.655129
32.833	0.76467	0.77157	0.779177	0.691994	0.654919
32.844	0.76467	0.77157	0.779177	0.691994	0.654709
32.855	0.76467	0.77157	0.779177	0.691703	0.654709
32.866	0.76467	0.77157	0.779177	0.691703	0.6545
32.877	0.76467	0.77157	0.779177	0.691703	0.65429
32.887	0.76467	0.77157	0.778757	0.691412	0.65408
32.898	0.76467	0.77157	0.778757	0.691412	0.65387
32.909	0.76467	0.772191	0.778757	0.691121	0.65387
32.92	0.76467	0.772191	0.778757	0.691121	0.653661
32.931	0.76467	0.772191	0.778757	0.691121	0.653451
32.942	0.76467	0.772191	0.778757	0.69083	0.653241
32.952	0.76467	0.772191	0.778757	0.69083	0.653031
32.963	0.76467	0.772191	0.778338	0.690539	0.652821
32.974	0.764059	0.772191	0.778338	0.690539	0.652821
32.985	0.764059	0.772191	0.778338	0.690539	0.652612
32.996	0.764059	0.772191	0.778338	0.690247	0.652402
33.007	0.764059	0.772191	0.778338	0.690247	0.652192
33.018	0.764059	0.772191	0.778338	0.689956	0.651982
33.028	0.764059	0.772191	0.777918	0.689956	0.651773
33.039	0.764059	0.772191	0.777918	0.689665	0.651773
33.05	0.764059	0.772191	0.777918	0.689665	0.651563
33.061	0.764059	0.772812	0.777918	0.689374	0.651353
33.072	0.764059	0.772812	0.777918	0.689374	0.651143
33.083	0.764059	0.772812	0.777498	0.689083	0.650934
33.093	0.763447	0.772812	0.777498	0.689083	0.650724
33.104	0.763447	0.772812	0.777498	0.688792	0.650514
33.115	0.763447	0.772812	0.777498	0.688792	0.650514
33.126	0.763447	0.772812	0.777498	0.688792	0.650304
33.137	0.763447	0.772812	0.777078	0.688501	0.650094
33.148	0.763447	0.772812	0.777078	0.688501	0.649885
33.159	0.763447	0.772812	0.777078	0.68821	0.649675
33.169	0.763447	0.772812	0.777078	0.68821	0.649465
33.18	0.763447	0.772812	0.776658	0.687918	0.649255
33.191	0.762836	0.772812	0.776658	0.687918	0.649046
33.202	0.762836	0.772812	0.776658	0.687627	0.648836
33.213	0.762836	0.772812	0.776658	0.687627	0.648836
33.224	0.762836	0.772812	0.776238	0.687336	0.648626
33.234	0.762836	0.772812	0.776238	0.687045	0.648416
33.245	0.762836	0.772812	0.776238	0.687045	0.648206
33.256	0.762836	0.772812	0.776238	0.686754	0.647997
33.267	0.762225	0.772812	0.775819	0.686754	0.647787
33.278	0.762225	0.772812	0.775819	0.686463	0.647577
33.289	0.762225	0.772812	0.775819	0.686463	0.647367
33.3	0.762225	0.772812	0.775819	0.686172	0.647158
33.31	0.762225	0.772812	0.775399	0.686172	0.646948
33.321	0.762225	0.772812	0.775399	0.685881	0.646738
33.332	0.761614	0.772812	0.775399	0.685881	0.646528
33.343	0.761614	0.772812	0.775399	0.68559	0.646318
33.354	0.761614	0.772812	0.774979	0.68559	0.646318
33.365	0.761614	0.772812	0.774979	0.685298	0.646109
33.376	0.761614	0.772812	0.774979	0.685007	0.645899
33.386	0.761614	0.772812	0.774559	0.685007	0.645689
33.397	0.761002	0.772812	0.774559	0.684716	0.645479
33.408	0.761002	0.772812	0.774559	0.684716	0.64527
33.419	0.761002	0.772812	0.774139	0.684425	0.64506
33.43	0.761002	0.772812	0.774139	0.684134	0.64485
33.441	0.761002	0.772812	0.774139	0.684134	0.64464
33.451	0.760391	0.772812	0.77372	0.683843	0.64443
33.462	0.760391	0.772812	0.77372	0.683843	0.644221
33.473	0.760391	0.772812	0.77372	0.683552	0.644011
33.484	0.760391	0.772812	0.7733	0.683552	0.643801
33.495	0.760391	0.772812	0.7733	0.683261	0.643591
33.506	0.75978	0.772812	0.7733	0.682969	0.643382
33.517	0.75978	0.772812	0.77288	0.682969	0.643172
33.527	0.75978	0.772812	0.77288	0.682678	0.642962
33.538	0.75978	0.772812	0.77288	0.682387	0.642752
33.549	0.75978	0.772812	0.77246	0.682387	0.642542
33.56	0.759169	0.772812	0.77246	0.682096	0.642333
33.571	0.759169	0.772812	0.77246	0.682096	0.642123
33.582	0.759169	0.772812	0.77204	0.681805	0.641913
33.592	0.759169	0.772812	0.77204	0.681514	0.641703
33.603	0.758557	0.772812	0.77204	0.681514	0.641494
33.614	0.758557	0.772191	0.77162	0.681223	0.641284
33.625	0.758557	0.772191	0.77162	0.680932	0.641074
33.636	0.758557	0.772191	0.771201	0.680932	0.640864
33.647	0.758557	0.772191	0.771201	0.68064	0.640654
33.658	0.757946	0.772191	0.771201	0.680349	0.640445
33.668	0.757946	0.772191	0.770781	0.680349	0.640235
33.679	0.757946	0.772191	0.770781	0.680058	0.640025
33.69	0.757946	0.772191	0.770781	0.679767	0.639815
33.701	0.757335	0.772191	0.770361	0.679767	0.639606
33.712	0.757335	0.772191	0.770361	0.679476	0.639396
33.723	0.757335	0.772191	0.769941	0.679185	0.639186
33.734	0.757335	0.772191	0.769941	0.679185	0.638976
33.744	0.756724	0.772191	0.769941	0.678894	0.638767
33.755	0.756724	0.772191	0.769521	0.678603	0.638557
33.766	0.756724	0.77157	0.769521	0.678603	0.638347
33.777	0.756724	0.77157	0.769102	0.678311	0.638137
33.788	0.756112	0.77157	0.769102	0.67802	0.637927
33.799	0.756112	0.77157	0.768682	0.67802	0.637718
33.809	0.756112	0.77157	0.768682	0.677729	0.637508
33.82	0.755501	0.77157	0.768682	0.677438	0.637298
33.831	0.755501	0.77157	0.768262	0.677438	0.637088
33.842	0.755501	0.77157	0.768262	0.677147	0.636879
33.853	0.755501	0.77157	0.767842	0.676856	0.636669
33.864	0.75489	0.77157	0.767842	0.676565	0.636459
33.875	0.75489	0.77095	0.767422	0.676565	0.636249
33.885	0.75489	0.77095	0.767422	0.676274	0.636039
33.896	0.754279	0.77095	0.767003	0.675983	0.63583
33.907	0.754279	0.77095	0.767003	0.675983	0.63562
33.918	0.754279	0.77095	0.767003	0.675691	0.63541
33.929	0.754279	0.77095	0.766583	0.6754	0.6352
33.94	0.753667	0.77095	0.766583	0.675109	0.634991
33.95	0.753667	0.77095	0.766163	0.675109	0.634781
33.961	0.753667	0.77095	0.766163	0.674818	0.634571
33.972	0.753056	0.770329	0.765743	0.674527	0.634361
33.983	0.753056	0.770329	0.765743	0.674527	0.633942
33.994	0.753056	0.770329	0.765323	0.674236	0.633732
34.005	0.752445	0.770329	0.765323	0.673945	0.633522
34.016	0.752445	0.770329	0.764903	0.673654	0.633312
34.026	0.752445	0.770329	0.764903	0.673654	0.633103
34.037	0.751834	0.770329	0.764484	0.673362	0.632893
34.048	0.751834	0.769708	0.764484	0.673071	0.632683
34.059	0.751834	0.769708	0.764064	0.67278	0.632473
34.07	0.751222	0.769708	0.764064	0.67278	0.632263
34.081	0.751222	0.769708	0.763644	0.672489	0.632054
34.091	0.751222	0.769708	0.763644	0.672198	0.631844
34.102	0.750611	0.769708	0.763224	0.671907	0.631634
34.113	0.750611	0.769708	0.763224	0.671616	0.631424
34.124	0.750611	0.769088	0.762804	0.671616	0.631005
34.135	0.75	0.769088	0.762804	0.671325	0.630795
34.146	0.75	0.769088	0.762385	0.671033	0.630585
34.157	0.75	0.769088	0.762385	0.670742	0.630375
34.167	0.749389	0.769088	0.761965	0.670742	0.630166
34.178	0.749389	0.769088	0.761965	0.670451	0.629956
34.189	0.749389	0.768467	0.761545	0.67016	0.629746
34.2	0.748778	0.768467	0.761545	0.669869	0.629536
34.211	0.748778	0.768467	0.761125	0.669578	0.629327
34.222	0.748778	0.768467	0.760705	0.669578	0.629117
34.233	0.748166	0.768467	0.760705	0.669287	0.628697
34.243	0.748166	0.768467	0.760285	0.668996	0.628488
34.254	0.747555	0.767846	0.760285	0.668705	0.628278
34.265	0.747555	0.767846	0.759866	0.668413	0.628068
34.276	0.747555	0.767846	0.759866	0.668413	0.627858
34.287	0.746944	0.767846	0.759446	0.668122	0.627648
34.298	0.746944	0.767846	0.759446	0.667831	0.627439
34.308	0.746944	0.767846	0.759026	0.66754	0.627229
34.319	0.746333	0.767225	0.759026	0.667249	0.626809
34.33	0.746333	0.767225	0.758606	0.667249	0.6266
34.341	0.745721	0.767225	0.758186	0.666958	0.62639
34.352	0.745721	0.767225	0.758186	0.666667	0.62618
34.363	0.745721	0.767225	0.757767	0.666376	0.62597
34.374	0.74511	0.766605	0.757767	0.666084	0.62576
34.384	0.74511	0.766605	0.757347	0.665793	0.625551
34.395	0.744499	0.766605	0.757347	0.665793	0.625131
34.406	0.744499	0.766605	0.756927	0.665502	0.624921
34.417	0.744499	0.766605	0.756507	0.665211	0.624712
34.428	0.743888	0.765984	0.756507	0.66492	0.624502
34.439	0.743888	0.765984	0.756087	0.664629	0.624292
34.449	0.743276	0.765984	0.756087	0.664338	0.624082
34.46	0.743276	0.765984	0.755668	0.664338	0.623872
34.471	0.743276	0.765363	0.755248	0.664047	0.623453
34.482	0.742665	0.765363	0.755248	0.663755	0.623243
34.493	0.742665	0.765363	0.754828	0.663464	0.623033
34.504	0.742054	0.765363	0.754828	0.663173	0.622824
34.515	0.742054	0.765363	0.754408	0.662882	0.622614
34.525	0.742054	0.764742	0.753988	0.662882	0.622404
34.536	0.741443	0.764742	0.753988	0.662591	0.621984
34.547	0.741443	0.764742	0.753568	0.6623	0.621775
34.558	0.740831	0.764742	0.753568	0.662009	0.621565
34.569	0.740831	0.764122	0.753149	0.661718	0.621355
34.58	0.74022	0.764122	0.752729	0.661426	0.621145
34.59	0.74022	0.764122	0.752729	0.661135	0.620936
34.601	0.74022	0.764122	0.752309	0.661135	0.620516
34.612	0.739609	0.763501	0.752309	0.660844	0.620306
34.623	0.739609	0.763501	0.751889	0.660553	0.620096
34.634	0.738998	0.763501	0.751469	0.660262	0.619887
34.645	0.738998	0.763501	0.751469	0.659971	0.619677
34.656	0.738386	0.76288	0.75105	0.65968	0.619257
34.666	0.738386	0.76288	0.75063	0.659389	0.619048
34.677	0.737775	0.76288	0.75063	0.659389	0.618838
34.688	0.737775	0.76288	0.75021	0.659098	0.618628
34.699	0.737164	0.762259	0.75021	0.658806	0.618418
34.71	0.737164	0.762259	0.74979	0.658515	0.618209
34.721	0.737164	0.762259	0.74937	0.658224	0.617789
34.732	0.736553	0.762259	0.74937	0.657933	0.617579
34.742	0.736553	0.761639	0.74895	0.657642	0.617369
34.753	0.735941	0.761639	0.748531	0.657351	0.61716
34.764	0.735941	0.761639	0.748531	0.65706	0.61695
34.775	0.73533	0.761639	0.748111	0.65706	0.61653
34.786	0.73533	0.761018	0.747691	0.656769	0.616321
34.797	0.734719	0.761018	0.747691	0.656477	0.616111
34.807	0.734719	0.761018	0.747271	0.656186	0.615901
34.818	0.734108	0.760397	0.747271	0.655895	0.615481
34.829	0.734108	0.760397	0.746851	0.655604	0.615272
34.84	0.733496	0.760397	0.746432	0.655313	0.615062
34.851	0.733496	0.760397	0.746432	0.655022	0.614852
34.862	0.732885	0.759777	0.746012	0.655022	0.614642
34.873	0.732885	0.759777	0.745592	0.654731	0.614223
34.883	0.732274	0.759777	0.745592	0.65444	0.614013
34.894	0.732274	0.759156	0.745172	0.654148	0.613803
34.905	0.731663	0.759156	0.744752	0.653857	0.613593
34.916	0.731663	0.759156	0.744752	0.653566	0.613174
34.927	0.731051	0.759156	0.744332	0.653275	0.612964
34.938	0.731051	0.758535	0.743913	0.652984	0.612754
34.948	0.73044	0.758535	0.743913	0.652693	0.612545
34.959	0.73044	0.758535	0.743493	0.652402	0.612335
34.97	0.729829	0.757914	0.743073	0.652402	0.611915
34.981	0.729829	0.757914	0.743073	0.652111	0.611705
34.992	0.729218	0.757914	0.742653	0.65182	0.611496
35.003	0.729218	0.757294	0.742233	0.651528	0.611286
35.014	0.728606	0.757294	0.742233	0.651237	0.610866
35.024	0.728606	0.757294	0.741814	0.650946	0.610657
35.035	0.727995	0.756673	0.741394	0.650655	0.610447
35.046	0.727995	0.756673	0.741394	0.650364	0.610237
35.057	0.727384	0.756673	0.740974	0.650073	0.609817
35.068	0.727384	0.756052	0.740554	0.650073	0.609608
35.079	0.726773	0.756052	0.740554	0.649782	0.609398
35.089	0.726773	0.756052	0.740134	0.649491	0.609188
35.1	0.726161	0.755431	0.739715	0.649199	0.608769
35.111	0.72555	0.755431	0.739715	0.648908	0.608559
35.122	0.72555	0.755431	0.739295	0.648617	0.608349
35.133	0.724939	0.754811	0.738875	0.648326	0.608139
35.144	0.724939	0.754811	0.738455	0.648035	0.60772
35.155	0.724328	0.754811	0.738455	0.647744	0.60751
35.165	0.724328	0.75419	0.738035	0.647453	0.6073
35.176	0.723716	0.75419	0.737615	0.647453	0.60709
35.187	0.723716	0.75419	0.737615	0.647162	0.606671
35.198	0.723105	0.753569	0.737196	0.64687	0.606461
35.209	0.722494	0.753569	0.736776	0.646579	0.606251
35.22	0.722494	0.753569	0.736776	0.646288	0.606042
35.231	0.721883	0.752948	0.736356	0.645997	0.605622
35.241	0.721883	0.752948	0.735936	0.645706	0.605412
35.252	0.721271	0.752328	0.735936	0.645415	0.605202
35.263	0.721271	0.752328	0.735516	0.645124	0.604993
35.274	0.72066	0.752328	0.735097	0.644833	0.604573
35.285	0.720049	0.751707	0.734677	0.644833	0.604363
35.296	0.720049	0.751707	0.734677	0.644541	0.604154
35.306	0.719438	0.751707	0.734257	0.64425	0.603944
35.317	0.719438	0.751086	0.733837	0.643959	0.603524
35.328	0.718826	0.751086	0.733837	0.643668	0.603314
35.339	0.718826	0.750466	0.733417	0.643377	0.603105
35.35	0.718215	0.750466	0.732997	0.643086	0.602685
35.361	0.717604	0.750466	0.732578	0.642795	0.602475
35.372	0.717604	0.749845	0.732578	0.642504	0.602266
35.382	0.716993	0.749845	0.732158	0.642213	0.602056
35.393	0.716993	0.749845	0.731738	0.642213	0.601636
35.404	0.716381	0.749224	0.731738	0.641921	0.601426
35.415	0.71577	0.749224	0.731318	0.64163	0.601217
35.426	0.71577	0.748603	0.730898	0.641339	0.601007
35.437	0.715159	0.748603	0.730479	0.641048	0.600587
35.447	0.715159	0.748603	0.730479	0.640757	0.600378
35.458	0.714548	0.747983	0.730059	0.640466	0.600168
35.469	0.713936	0.747983	0.729639	0.640175	0.599748
35.48	0.713936	0.747362	0.729639	0.639884	0.599538
35.491	0.713325	0.747362	0.729219	0.639592	0.599329
35.502	0.712714	0.746741	0.728799	0.639592	0.598909
35.513	0.712714	0.746741	0.72838	0.639301	0.598699
35.523	0.712103	0.746741	0.72838	0.63901	0.59849
35.534	0.712103	0.74612	0.72796	0.638719	0.59828
35.545	0.711491	0.74612	0.72754	0.638428	0.59786
35.556	0.71088	0.7455	0.72754	0.638137	0.597651
35.567	0.71088	0.7455	0.72712	0.637846	0.597441
35.578	0.710269	0.7455	0.7267	0.637555	0.597021
35.589	0.709658	0.744879	0.72628	0.637263	0.596811
35.599	0.709658	0.744879	0.72628	0.637263	0.596602
35.61	0.709046	0.744258	0.725861	0.636972	0.596392
35.621	0.708435	0.744258	0.725441	0.636681	0.595972
35.632	0.708435	0.743637	0.725021	0.63639	0.595763
35.643	0.707824	0.743637	0.725021	0.636099	0.595553
35.654	0.707213	0.743017	0.724601	0.635808	0.595133
35.664	0.707213	0.743017	0.724181	0.635517	0.594923
35.675	0.706601	0.743017	0.723762	0.635226	0.594714
35.686	0.70599	0.742396	0.723762	0.634934	0.594294
35.697	0.70599	0.742396	0.723342	0.634934	0.594084
35.708	0.705379	0.741775	0.722922	0.634643	0.593875
35.719	0.704768	0.741775	0.722502	0.634352	0.593455
35.73	0.704768	0.741155	0.722502	0.634061	0.593245
35.74	0.704156	0.741155	0.722082	0.63377	0.593035
35.751	0.703545	0.740534	0.721662	0.633479	0.592616
35.762	0.703545	0.740534	0.721243	0.633188	0.592406
35.773	0.702934	0.739913	0.721243	0.632897	0.592196
35.784	0.702323	0.739913	0.720823	0.632897	0.591777
35.795	0.702323	0.739913	0.720403	0.632606	0.591567
35.805	0.701711	0.739292	0.719983	0.632314	0.591357
35.816	0.7011	0.739292	0.719983	0.632023	0.590938
35.827	0.7011	0.738672	0.719563	0.631732	0.590728
35.838	0.700489	0.738672	0.719144	0.631441	0.590518
35.849	0.699878	0.738051	0.718724	0.63115	0.590099
35.86	0.699878	0.738051	0.718724	0.630859	0.589889
35.871	0.699267	0.73743	0.718304	0.630859	0.589679
35.881	0.698655	0.73743	0.717884	0.630568	0.589259
35.892	0.698044	0.736809	0.717464	0.630277	0.58905
35.903	0.698044	0.736809	0.717464	0.629985	0.58884
35.914	0.697433	0.736189	0.717045	0.629694	0.58842
35.925	0.696822	0.736189	0.716625	0.629403	0.588211
35.936	0.696822	0.735568	0.716205	0.629112	0.588001
35.946	0.69621	0.735568	0.716205	0.628821	0.587581
35.957	0.695599	0.734947	0.715785	0.628821	0.587372
35.968	0.694988	0.734947	0.715365	0.62853	0.587162
35.979	0.694988	0.734327	0.714945	0.628239	0.586742
35.99	0.694377	0.734327	0.714526	0.627948	0.586532
36.001	0.693765	0.733706	0.714526	0.627656	0.586323
36.012	0.693154	0.733706	0.714106	0.627365	0.585903
36.022	0.693154	0.733085	0.713686	0.627074	0.585693
36.033	0.692543	0.733085	0.713266	0.626783	0.585274
36.044	0.691932	0.732464	0.713266	0.626783	0.585064
36.055	0.69132	0.732464	0.712846	0.626492	0.584854
36.066	0.69132	0.731844	0.712427	0.626201	0.584435
36.077	0.690709	0.731844	0.712007	0.62591	0.584225
36.088	0.690098	0.731223	0.711587	0.625619	0.584015
36.098	0.689487	0.731223	0.711587	0.625328	0.583596
36.109	0.689487	0.730602	0.711167	0.625036	0.583386
36.12	0.688875	0.730602	0.710747	0.625036	0.583176
36.131	0.688264	0.729981	0.710327	0.624745	0.582756
36.142	0.687653	0.729361	0.709908	0.624454	0.582547
36.153	0.687653	0.729361	0.709908	0.624163	0.582127
36.163	0.687042	0.72874	0.709488	0.623872	0.581917
36.174	0.68643	0.72874	0.709068	0.623581	0.581708
36.185	0.685819	0.728119	0.708648	0.62329	0.581288
36.196	0.685819	0.728119	0.708228	0.62329	0.581078
36.207	0.685208	0.727498	0.708228	0.622999	0.580659
36.218	0.684597	0.727498	0.707809	0.622707	0.580449
36.229	0.683985	0.726878	0.707389	0.622416	0.580239
36.239	0.683374	0.726878	0.706969	0.622125	0.57982
36.25	0.683374	0.726257	0.706549	0.621834	0.57961
36.261	0.682763	0.725636	0.706549	0.621543	0.57919
36.272	0.682152	0.725636	0.706129	0.621543	0.57898
36.283	0.68154	0.725016	0.705709	0.621252	0.578771
36.294	0.680929	0.725016	0.70529	0.620961	0.578351
36.304	0.680929	0.724395	0.70487	0.62067	0.578141
36.315	0.680318	0.724395	0.70487	0.620378	0.577722
36.326	0.679707	0.723774	0.70445	0.620087	0.577512
36.337	0.679095	0.723774	0.70403	0.619796	0.577302
36.348	0.678484	0.723153	0.70361	0.619505	0.576883
36.359	0.678484	0.722533	0.703191	0.619505	0.576673
36.37	0.677873	0.722533	0.702771	0.619214	0.576253
36.38	0.677262	0.721912	0.702771	0.618923	0.576044
36.391	0.67665	0.721912	0.702351	0.618632	0.575834
36.402	0.676039	0.721291	0.701931	0.618341	0.575414
36.413	0.676039	0.721291	0.701511	0.618049	0.575205
36.424	0.675428	0.72067	0.701092	0.618049	0.574785
36.435	0.674817	0.72005	0.700672	0.617758	0.574575
36.445	0.674205	0.72005	0.700672	0.617467	0.574156
36.456	0.673594	0.719429	0.700252	0.617176	0.573946
36.467	0.672983	0.719429	0.699832	0.616885	0.573736
36.478	0.672983	0.718808	0.699412	0.616594	0.573317
36.489	0.672372	0.718187	0.698992	0.616303	0.573107
36.5	0.67176	0.718187	0.698573	0.616303	0.572687
36.511	0.671149	0.717567	0.698573	0.616012	0.572477
36.521	0.670538	0.717567	0.698153	0.615721	0.572058
36.532	0.669927	0.716946	0.697733	0.615429	0.571848
36.543	0.669927	0.716325	0.697313	0.615138	0.571429
36.554	0.669315	0.716325	0.696893	0.614847	0.571219
36.565	0.668704	0.715705	0.696474	0.614556	0.571009
36.576	0.668093	0.715705	0.696054	0.614556	0.570589
36.587	0.667482	0.715084	0.696054	0.614265	0.57038
36.597	0.66687	0.714463	0.695634	0.613974	0.56996
36.608	0.666259	0.714463	0.695214	0.613683	0.56975
36.619	0.666259	0.713842	0.694794	0.613392	0.569331
36.63	0.665648	0.713222	0.694374	0.6131	0.569121
36.641	0.665037	0.713222	0.693955	0.612809	0.568701
36.652	0.664425	0.712601	0.693535	0.612518	0.568492
36.662	0.663814	0.712601	0.693535	0.612518	0.568072
36.673	0.663203	0.71198	0.693115	0.612227	0.567862
36.684	0.662592	0.711359	0.692695	0.611936	0.567653
36.695	0.66198	0.711359	0.692275	0.611645	0.567233
36.706	0.66198	0.710739	0.691856	0.611354	0.567023
36.717	0.661369	0.710118	0.691436	0.611063	0.566604
36.728	0.660758	0.710118	0.691016	0.610771	0.566394
36.738	0.660147	0.709497	0.690596	0.610771	0.565974
36.749	0.659535	0.709497	0.690176	0.61048	0.565765
36.76	0.658924	0.708876	0.690176	0.610189	0.565345
36.771	0.658313	0.708256	0.689757	0.609898	0.565135
36.782	0.657702	0.708256	0.689337	0.609607	0.564716
36.793	0.657702	0.707635	0.688917	0.609316	0.564506
36.803	0.65709	0.707014	0.688497	0.609025	0.564086
36.814	0.656479	0.707014	0.688077	0.608734	0.563877
36.825	0.655868	0.706394	0.687657	0.608734	0.563457
36.836	0.655257	0.705773	0.687238	0.608443	0.563247
36.847	0.654645	0.705773	0.686818	0.608151	0.562828
36.858	0.654034	0.705152	0.686818	0.60786	0.562618
36.869	0.653423	0.704531	0.686398	0.607569	0.562198
36.879	0.652812	0.704531	0.685978	0.607278	0.561989
36.89	0.6522	0.703911	0.685558	0.606987	0.561569
36.901	0.651589	0.70329	0.685139	0.606696	0.561359
36.912	0.651589	0.70329	0.684719	0.606696	0.56094
36.923	0.650978	0.702669	0.684299	0.606405	0.56073
36.934	0.650367	0.702048	0.683879	0.606114	0.56031
36.944	0.649756	0.702048	0.683459	0.605822	0.560101
36.955	0.649144	0.701428	0.683039	0.605531	0.559681
36.966	0.648533	0.700807	0.68262	0.60524	0.559471
36.977	0.647922	0.700807	0.68262	0.604949	0.559052
36.988	0.647311	0.700186	0.6822	0.604658	0.558842
36.999	0.646699	0.699565	0.68178	0.604367	0.558422
37.01	0.646088	0.699565	0.68136	0.604367	0.558213
37.02	0.645477	0.698945	0.68094	0.604076	0.557793
37.031	0.644866	0.698324	0.680521	0.603785	0.557583
37.042	0.644254	0.697703	0.680101	0.603493	0.557164
37.053	0.643643	0.697703	0.679681	0.603202	0.556954
37.064	0.643643	0.697083	0.679261	0.602911	0.556535
37.075	0.643032	0.696462	0.678841	0.60262	0.556325
37.086	0.642421	0.696462	0.678421	0.602329	0.555905
37.096	0.641809	0.695841	0.678002	0.602038	0.555695
37.107	0.641198	0.69522	0.677582	0.601747	0.555276
37.118	0.640587	0.6946	0.677162	0.601456	0.555066
37.129	0.639976	0.6946	0.676742	0.601456	0.554647
37.14	0.639364	0.693979	0.676322	0.601164	0.554437
37.151	0.638753	0.693358	0.676322	0.600873	0.554017
37.161	0.638142	0.693358	0.675903	0.600582	0.553807
37.172	0.637531	0.692737	0.675483	0.600291	0.553388
37.183	0.636919	0.692117	0.675063	0.6	0.552968
37.194	0.636308	0.691496	0.674643	0.599709	0.552759
37.205	0.635697	0.691496	0.674223	0.599418	0.552339
37.216	0.635086	0.690875	0.673804	0.599127	0.552129
37.227	0.634474	0.690255	0.673384	0.598836	0.55171
37.237	0.633863	0.689634	0.672964	0.598544	0.5515
37.248	0.633252	0.689634	0.672544	0.598253	0.55108
37.259	0.632641	0.689013	0.672124	0.597962	0.550871
37.27	0.632029	0.688392	0.671704	0.597671	0.550451
37.281	0.631418	0.688392	0.671285	0.59738	0.550241
37.292	0.630807	0.687772	0.670865	0.597089	0.549822
37.302	0.630196	0.687151	0.670445	0.596798	0.549612
37.313	0.629584	0.68653	0.670025	0.596507	0.549192
37.324	0.628973	0.68653	0.669605	0.596507	0.548983
37.335	0.628362	0.685909	0.669186	0.596215	0.548563
37.346	0.627751	0.685289	0.668766	0.595924	0.548143
37.357	0.627139	0.684668	0.668346	0.595633	0.547934
37.368	0.626528	0.684047	0.667926	0.595342	0.547514
37.378	0.625917	0.684047	0.667506	0.595051	0.547304
37.389	0.625306	0.683426	0.667086	0.59476	0.546885
37.4	0.624694	0.682806	0.666667	0.594469	0.546675
37.411	0.624083	0.682185	0.666247	0.594178	0.546256
37.422	0.623472	0.682185	0.665827	0.593886	0.546046
37.433	0.622861	0.681564	0.665407	0.593595	0.545626
37.444	0.622249	0.680944	0.664987	0.593304	0.545416
37.454	0.621638	0.680323	0.664568	0.593013	0.544997
37.465	0.621027	0.680323	0.664148	0.592722	0.544577
37.476	0.620416	0.679702	0.663728	0.592431	0.544368
37.487	0.619804	0.679081	0.663308	0.59214	0.543948
37.498	0.619193	0.678461	0.662888	0.591849	0.543738
37.509	0.618582	0.67784	0.662469	0.591557	0.543319
37.519	0.617971	0.67784	0.662049	0.591266	0.543109
37.53	0.617359	0.677219	0.661629	0.590684	0.542689
37.541	0.616748	0.676598	0.661209	0.590393	0.54248
37.552	0.616137	0.675978	0.660789	0.590102	0.54206
37.563	0.615526	0.675357	0.660369	0.589811	0.54164
37.574	0.614914	0.675357	0.65995	0.58952	0.541431
37.585	0.614303	0.674736	0.65953	0.589229	0.541011
37.595	0.613692	0.674115	0.65911	0.588937	0.540801
37.606	0.613081	0.673495	0.65869	0.588646	0.540382
37.617	0.612469	0.672874	0.65827	0.588355	0.540172
37.628	0.611858	0.672874	0.657851	0.588064	0.539752
37.639	0.611247	0.672253	0.657431	0.587773	0.539543
37.65	0.610636	0.671633	0.657011	0.587482	0.539123
37.66	0.610024	0.671012	0.656591	0.587191	0.538704
37.671	0.609413	0.670391	0.656171	0.5869	0.538494
37.682	0.608802	0.670391	0.655751	0.586608	0.538074
37.693	0.608191	0.66977	0.655332	0.586026	0.537864
37.704	0.607579	0.66915	0.654912	0.585735	0.537445
37.715	0.606968	0.668529	0.654072	0.585444	0.537235
37.726	0.606357	0.667908	0.653652	0.585153	0.536816
37.736	0.605746	0.667287	0.653233	0.584862	0.536396
37.747	0.605134	0.667287	0.652813	0.584571	0.536186
37.758	0.604523	0.666667	0.652393	0.584279	0.535767
37.769	0.603912	0.666046	0.651973	0.583988	0.535557
37.78	0.602689	0.665425	0.651553	0.583406	0.535137
37.791	0.602078	0.664804	0.651134	0.583115	0.534928
37.801	0.601467	0.664184	0.650714	0.582824	0.534508
37.812	0.600856	0.664184	0.650294	0.582533	0.534089
37.823	0.600244	0.663563	0.649874	0.582242	0.533879
37.834	0.599633	0.662942	0.649454	0.581951	0.533459
37.845	0.599022	0.662322	0.649034	0.581659	0.533249
37.856	0.598411	0.661701	0.648615	0.581077	0.53283
37.867	0.5978	0.66108	0.648195	0.580786	0.53241
37.877	0.597188	0.660459	0.647355	0.580495	0.532201
37.888	0.596577	0.660459	0.646935	0.580204	0.531781
37.899	0.595966	0.659839	0.646516	0.579913	0.531571
37.91	0.595355	0.659218	0.646096	0.57933	0.531152
37.921	0.594743	0.658597	0.645676	0.579039	0.530732
37.932	0.593521	0.657976	0.645256	0.578748	0.530522
37.943	0.59291	0.657356	0.644836	0.578457	0.530103
37.953	0.592298	0.656735	0.644416	0.578166	0.529893
37.964	0.591687	0.656735	0.643997	0.577584	0.529473
37.975	0.591076	0.656114	0.643577	0.577293	0.529054
37.986	0.590465	0.655493	0.643157	0.577001	0.528844
37.997	0.589853	0.654873	0.642317	0.57671	0.528425
38.008	0.589242	0.654252	0.641898	0.576128	0.528215
38.018	0.588631	0.653631	0.641478	0.575837	0.527795
38.029	0.58802	0.653011	0.641058	0.575546	0.527376
38.04	0.587408	0.65239	0.640638	0.575255	0.527166
38.051	0.586186	0.651769	0.640218	0.574672	0.526746
38.062	0.585575	0.651769	0.639798	0.574381	0.526537
38.073	0.584963	0.651148	0.639379	0.57409	0.526117
38.084	0.584352	0.650528	0.638959	0.573508	0.525698
38.094	0.583741	0.649907	0.638119	0.573217	0.525488
38.105	0.58313	0.649286	0.637699	0.572926	0.525068
38.116	0.582518	0.648665	0.63728	0.572344	0.524858
38.127	0.581907	0.648045	0.63686	0.572052	0.524439
38.138	0.581296	0.647424	0.63644	0.571761	0.524019
38.149	0.580073	0.646803	0.63602	0.57147	0.52381
38.159	0.579462	0.646803	0.6356	0.570888	0.52339
38.17	0.578851	0.646182	0.635181	0.570597	0.52297
38.181	0.57824	0.645562	0.634341	0.570015	0.522761
38.192	0.577628	0.644941	0.633921	0.569723	0.522341
38.203	0.577017	0.64432	0.633501	0.569432	0.522131
38.214	0.576406	0.6437	0.633081	0.56885	0.521712
38.225	0.575795	0.643079	0.632662	0.568559	0.521292
38.235	0.574572	0.642458	0.632242	0.568268	0.521082
38.246	0.573961	0.641837	0.631402	0.567686	0.520663
38.257	0.57335	0.641217	0.630982	0.567394	0.520243
38.268	0.572738	0.640596	0.630563	0.566812	0.520034
38.279	0.572127	0.639975	0.630143	0.566521	0.519614
38.29	0.571516	0.639975	0.629723	0.56623	0.519404
38.3	0.570905	0.639354	0.629303	0.565648	0.518985
38.311	0.569682	0.638734	0.628883	0.565357	0.518565
38.322	0.569071	0.638113	0.628044	0.564774	0.518355
38.333	0.56846	0.637492	0.627624	0.564483	0.517936
38.344	0.567848	0.636872	0.627204	0.563901	0.517516
38.355	0.567237	0.636251	0.626784	0.56361	0.517306
38.366	0.566626	0.63563	0.626364	0.563319	0.516887
38.376	0.566015	0.635009	0.625525	0.562737	0.516467
38.387	0.564792	0.634389	0.625105	0.562445	0.516258
38.398	0.564181	0.633768	0.624685	0.561863	0.515838
38.409	0.56357	0.633147	0.624265	0.561572	0.515419
38.42	0.562958	0.632526	0.623846	0.56099	0.515209
38.431	0.562347	0.631906	0.623426	0.560699	0.514789
38.442	0.561736	0.631285	0.622586	0.560116	0.514579
38.452	0.560513	0.630664	0.622166	0.559825	0.51416
38.463	0.559902	0.630043	0.621746	0.559243	0.51374
38.474	0.559291	0.629423	0.621327	0.558661	0.513531
38.485	0.55868	0.628802	0.620907	0.55837	0.513111
38.496	0.558068	0.628802	0.620067	0.557787	0.512691
38.507	0.557457	0.628181	0.619647	0.557496	0.512482
38.517	0.556235	0.627561	0.619228	0.556914	0.512062
38.528	0.555623	0.62694	0.618808	0.556623	0.511643
38.539	0.555012	0.626319	0.618388	0.556041	0.511433
38.55	0.554401	0.625698	0.617548	0.55575	0.511013
38.561	0.55379	0.625078	0.617128	0.555167	0.510594
38.572	0.553178	0.624457	0.616709	0.554585	0.510384
38.583	0.551956	0.623836	0.616289	0.554294	0.509964
38.593	0.551345	0.623215	0.615449	0.553712	0.509545
38.604	0.550733	0.622595	0.615029	0.553421	0.509335
38.615	0.550122	0.621974	0.61461	0.552838	0.508915
38.626	0.549511	0.621353	0.61419	0.552256	0.508496
38.637	0.548289	0.620732	0.61377	0.551965	0.508286
38.648	0.547677	0.620112	0.61293	0.551383	0.507867
38.658	0.547066	0.619491	0.61251	0.550801	0.507447
38.669	0.546455	0.61887	0.612091	0.550509	0.507027
38.68	0.545844	0.61825	0.611671	0.549927	0.506818
38.691	0.544621	0.617629	0.610831	0.549345	0.506398
38.702	0.54401	0.617008	0.610411	0.549054	0.505979
38.713	0.543399	0.616387	0.609992	0.548472	0.505769
38.724	0.542787	0.615767	0.609572	0.547889	0.505349
38.734	0.542176	0.615146	0.608732	0.547307	0.50493
38.745	0.540954	0.614525	0.608312	0.547016	0.50472
38.756	0.540342	0.613904	0.607893	0.546434	0.5043
38.767	0.539731	0.613284	0.607473	0.545852	0.503881
38.778	0.53912	0.612663	0.606633	0.54556	0.503671
38.789	0.538509	0.612042	0.606213	0.544978	0.503252
38.799	0.537286	0.611421	0.605793	0.544396	0.502832
38.81	0.536675	0.610801	0.604954	0.543814	0.502412
38.821	0.536064	0.61018	0.604534	0.543523	0.502203
38.832	0.535452	0.609559	0.604114	0.54294	0.501783
38.843	0.53423	0.608939	0.603694	0.542358	0.501364
38.854	0.533619	0.608318	0.602855	0.541776	0.501154
38.865	0.533007	0.607697	0.602435	0.541194	0.500734
38.875	0.532396	0.607076	0.602015	0.540902	0.500315
38.886	0.531785	0.606456	0.601595	0.54032	0.500105
38.897	0.530562	0.605835	0.600756	0.539738	0.499685
38.908	0.529951	0.605214	0.600336	0.539156	0.499266
38.919	0.52934	0.604593	0.599916	0.538574	0.498846
38.93	0.528729	0.603352	0.599076	0.537991	0.498636
38.941	0.527506	0.602731	0.598657	0.5377	0.498217
38.951	0.526895	0.60211	0.598237	0.537118	0.497797
38.962	0.526284	0.60149	0.597397	0.536536	0.497588
38.973	0.525672	0.600869	0.596977	0.535953	0.497168
38.984	0.52445	0.600248	0.596558	0.535371	0.496748
38.995	0.523839	0.599628	0.596138	0.534789	0.496329
39.006	0.523227	0.599007	0.595298	0.534207	0.496119
39.016	0.522616	0.598386	0.594878	0.533624	0.4957
39.027	0.522005	0.597765	0.594458	0.533042	0.49528
39.038	0.520782	0.597145	0.593619	0.532751	0.49507
39.049	0.520171	0.596524	0.593199	0.532169	0.494651
39.06	0.51956	0.595903	0.592779	0.531587	0.494231
39.071	0.518949	0.595282	0.59194	0.531004	0.493812
39.082	0.517726	0.594662	0.59152	0.530422	0.493602
39.092	0.517115	0.594041	0.5911	0.52984	0.493182
39.103	0.516504	0.59342	0.59026	0.529258	0.492763
39.114	0.515892	0.5928	0.58984	0.528675	0.492343
39.125	0.51467	0.591558	0.589421	0.528093	0.492133
39.136	0.514059	0.590937	0.588581	0.527511	0.491714
39.147	0.513447	0.590317	0.588161	0.526929	0.491294
39.157	0.512836	0.589696	0.587741	0.526346	0.490875
39.168	0.511614	0.589075	0.586902	0.525764	0.490665
39.179	0.511002	0.588454	0.586482	0.525182	0.490245
39.19	0.510391	0.587834	0.586062	0.5246	0.489826
39.201	0.50978	0.587213	0.585223	0.524017	0.489616
39.212	0.508557	0.586592	0.584803	0.523435	0.489197
39.223	0.507946	0.585971	0.583963	0.522853	0.488777
39.233	0.507335	0.585351	0.583543	0.522271	0.488357
39.244	0.506112	0.58473	0.583123	0.521689	0.488148
39.255	0.505501	0.583489	0.582284	0.521106	0.487728
39.266	0.50489	0.582868	0.581864	0.520233	0.487309
39.277	0.504279	0.582247	0.581444	0.519651	0.486889
39.288	0.503056	0.581626	0.580605	0.519068	0.486469
39.298	0.502445	0.581006	0.580185	0.518486	0.48626
39.309	0.501834	0.580385	0.579345	0.517904	0.48584
39.32	0.501222	0.579764	0.578925	0.517322	0.485421
39.331	0.5	0.579143	0.578505	0.516739	0.485001
39.342	0.499389	0.578523	0.577666	0.516157	0.484791
39.353	0.498778	0.577902	0.577246	0.515575	0.484372
39.364	0.498166	0.57666	0.576406	0.514702	0.483952
39.374	0.496944	0.57604	0.575987	0.514119	0.483533
39.385	0.496333	0.575419	0.575567	0.513537	0.483323
39.396	0.495721	0.574798	0.574727	0.512955	0.482903
39.407	0.494499	0.574178	0.574307	0.512373	0.482484
39.418	0.493888	0.573557	0.573468	0.51179	0.482064
39.429	0.493276	0.572936	0.573048	0.510917	0.481854
39.44	0.492665	0.572315	0.572208	0.510335	0.481435
39.45	0.491443	0.571074	0.571788	0.509753	0.481015
39.461	0.490831	0.570453	0.571369	0.50917	0.480596
39.472	0.49022	0.569832	0.570529	0.508588	0.480176
39.483	0.488998	0.569212	0.570109	0.507715	0.479966
39.494	0.488386	0.568591	0.56927	0.507132	0.479547
39.505	0.487775	0.56797	0.56885	0.50655	0.479127
39.515	0.487164	0.567349	0.56801	0.505968	0.478708
39.526	0.485941	0.566108	0.56759	0.505095	0.478498
39.537	0.48533	0.565487	0.56717	0.504512	0.478078
39.548	0.484719	0.564867	0.566331	0.50393	0.477659
39.559	0.483496	0.564246	0.565911	0.503348	0.477239
39.57	0.482885	0.563625	0.565071	0.502475	0.47682
39.581	0.482274	0.563004	0.564652	0.501892	0.47661
39.591	0.481663	0.562384	0.563812	0.50131	0.47619
39.602	0.48044	0.561142	0.563392	0.500437	0.475771
39.613	0.479829	0.560521	0.562552	0.499854	0.475351
39.624	0.479218	0.559901	0.562133	0.499272	0.474932
39.635	0.477995	0.55928	0.561293	0.49869	0.474722
39.646	0.477384	0.558659	0.560873	0.497817	0.474302
39.656	0.476773	0.558038	0.560034	0.497234	0.473883
39.667	0.47555	0.556797	0.559614	0.496652	0.473463
39.678	0.474939	0.556176	0.558774	0.495779	0.473044
39.689	0.474328	0.555556	0.558354	0.495197	0.472834
39.7	0.473105	0.554935	0.557515	0.494323	0.472415
39.711	0.472494	0.554314	0.557095	0.493741	0.471995
39.722	0.471883	0.553693	0.556255	0.493159	0.471575
39.732	0.471271	0.552452	0.555835	0.492285	0.471156
39.743	0.470049	0.551831	0.554996	0.491703	0.470946
39.754	0.469438	0.55121	0.554576	0.491121	0.470527
39.765	0.468826	0.55059	0.553736	0.490247	0.470107
39.776	0.467604	0.549969	0.553317	0.489665	0.469687
39.787	0.466993	0.548727	0.552477	0.488792	0.469268
39.798	0.466381	0.548107	0.552057	0.48821	0.468848
39.808	0.465159	0.547486	0.551217	0.487627	0.468639
39.819	0.464548	0.546865	0.550798	0.486754	0.468219
39.83	0.463936	0.546245	0.549958	0.486172	0.467799
39.841	0.462714	0.545003	0.549538	0.485298	0.46738
39.852	0.462103	0.544382	0.548699	0.484716	0.46696
39.863	0.461491	0.543762	0.547859	0.483843	0.466751
39.873	0.460269	0.543141	0.547439	0.483261	0.466331
39.884	0.459658	0.54252	0.546599	0.482387	0.465911
39.895	0.459046	0.541279	0.54618	0.481805	0.465492
39.906	0.457824	0.540658	0.54534	0.480932	0.465072
39.917	0.457213	0.540037	0.54492	0.480349	0.464653
39.928	0.456601	0.539417	0.544081	0.479476	0.464443
39.939	0.45599	0.538796	0.543241	0.478894	0.464023
39.949	0.454768	0.537554	0.542821	0.47802	0.463604
39.96	0.454156	0.536934	0.541982	0.477438	0.463184
39.971	0.453545	0.536313	0.541562	0.476565	0.462765
39.982	0.452323	0.535692	0.540722	0.475983	0.462345
39.993	0.451711	0.534451	0.539882	0.475109	0.461926
40.004	0.4511	0.53383	0.539463	0.474527	0.461716
40.014	0.449878	0.533209	0.538623	0.473654	0.461296
40.025	0.449267	0.532588	0.538203	0.473071	0.460877
40.036	0.448655	0.531347	0.537364	0.472198	0.460457
40.047	0.447433	0.530726	0.536524	0.471616	0.460038
40.058	0.446822	0.530106	0.536104	0.470742	0.459618
40.069	0.44621	0.529485	0.535264	0.469869	0.459408
40.08	0.444988	0.528243	0.534845	0.469287	0.458989
40.09	0.444377	0.527623	0.534005	0.468413	0.458569
40.101	0.443154	0.527002	0.533165	0.467831	0.45815
40.112	0.442543	0.526381	0.532746	0.466958	0.45773
40.123	0.441932	0.52514	0.531906	0.466084	0.457311
40.134	0.440709	0.524519	0.531066	0.465502	0.456891
40.145	0.440098	0.523898	0.530647	0.464629	0.456681
40.155	0.439487	0.523277	0.529807	0.464047	0.456262
40.166	0.438264	0.522036	0.528967	0.463173	0.455842
40.177	0.437653	0.521415	0.528547	0.4623	0.455423
40.188	0.437042	0.520795	0.527708	0.461718	0.455003
40.199	0.435819	0.520174	0.527288	0.460844	0.454584
40.21	0.435208	0.518932	0.526448	0.459971	0.454164
40.221	0.434597	0.518312	0.525609	0.459389	0.453744
40.231	0.433374	0.517691	0.525189	0.458515	0.453535
40.242	0.432763	0.51707	0.524349	0.457642	0.453115
40.253	0.432152	0.515829	0.52351	0.45706	0.452696
40.264	0.430929	0.515208	0.52267	0.456186	0.452276
40.275	0.430318	0.514587	0.52225	0.455313	0.451857
40.286	0.429707	0.513346	0.521411	0.454731	0.451437
40.297	0.428484	0.512725	0.520571	0.453857	0.451017
40.307	0.427873	0.512104	0.520151	0.452984	0.450598
40.318	0.42665	0.511484	0.519312	0.452402	0.450178
40.329	0.426039	0.510242	0.518472	0.451528	0.449969
40.34	0.425428	0.509621	0.518052	0.450655	0.449549
40.351	0.424205	0.509001	0.517212	0.449782	0.449129
40.362	0.423594	0.507759	0.516373	0.449199	0.44871
40.372	0.422983	0.507138	0.515533	0.448326	0.44829
40.383	0.42176	0.506518	0.515113	0.447453	0.447871
40.394	0.421149	0.505276	0.514274	0.44687	0.447451
40.405	0.419927	0.504655	0.513434	0.445997	0.447032
40.416	0.419315	0.504035	0.513014	0.445124	0.446612
40.427	0.418704	0.502793	0.512175	0.44425	0.446193
40.438	0.417482	0.502173	0.511335	0.443668	0.445773
40.448	0.41687	0.501552	0.510495	0.442795	0.445563
40.459	0.416259	0.500931	0.510076	0.441921	0.445144
40.47	0.415037	0.49969	0.509236	0.441048	0.444724
40.481	0.414425	0.499069	0.508396	0.440175	0.444305
40.492	0.413203	0.498448	0.507557	0.439592	0.443885
40.503	0.412592	0.497207	0.507137	0.438719	0.443465
40.513	0.41198	0.496586	0.506297	0.437846	0.443046
40.524	0.410758	0.495965	0.505458	0.436972	0.442626
40.535	0.410147	0.494724	0.504618	0.43639	0.442207
40.546	0.409535	0.494103	0.504198	0.435517	0.441787
40.557	0.408313	0.493482	0.503359	0.434643	0.441368
40.568	0.407702	0.492241	0.502519	0.43377	0.440948
40.579	0.406479	0.49162	0.501679	0.432897	0.440529
40.589	0.405868	0.490999	0.50084	0.432314	0.440109
40.6	0.405257	0.489758	0.50042	0.431441	0.43969
40.611	0.404034	0.489137	0.49958	0.430568	0.43927
40.622	0.403423	0.487896	0.498741	0.429694	0.43885
40.633	0.4022	0.487275	0.497901	0.428821	0.438431
40.644	0.401589	0.486654	0.497061	0.428239	0.438221
40.654	0.400978	0.485413	0.496641	0.427365	0.437802
40.665	0.399756	0.484792	0.495802	0.426492	0.437382
40.676	0.399144	0.484171	0.494962	0.425619	0.436962
40.687	0.397922	0.48293	0.494123	0.424745	0.436543
40.698	0.397311	0.482309	0.493283	0.423872	0.436123
40.709	0.396699	0.481688	0.492863	0.42329	0.435704
40.72	0.395477	0.480447	0.492024	0.422416	0.435284
40.73	0.394866	0.479826	0.491184	0.421543	0.434865
40.741	0.393643	0.478585	0.490344	0.42067	0.434445
40.752	0.393032	0.477964	0.489505	0.419796	0.434026
40.763	0.392421	0.477343	0.488665	0.418923	0.433606
40.774	0.391198	0.476102	0.488245	0.418341	0.433186
40.785	0.390587	0.475481	0.487406	0.417467	0.432767
40.796	0.389364	0.47486	0.486566	0.416594	0.432347
40.806	0.388753	0.473619	0.485726	0.415721	0.431928
40.817	0.387531	0.472998	0.484887	0.414847	0.431508
40.828	0.386919	0.471757	0.484047	0.413974	0.431089
40.839	0.386308	0.471136	0.483627	0.4131	0.430669
40.85	0.385086	0.470515	0.482788	0.412518	0.43025
40.861	0.384474	0.469274	0.481948	0.411645	0.42983
40.871	0.383252	0.468653	0.481108	0.410771	0.429411
40.882	0.382641	0.467412	0.480269	0.409898	0.428991
40.893	0.381418	0.466791	0.479429	0.409025	0.428571
40.904	0.380807	0.46617	0.478589	0.408151	0.427942
40.915	0.380196	0.464929	0.47775	0.407278	0.427523
40.926	0.378973	0.464308	0.47733	0.406405	0.427103
40.937	0.378362	0.463066	0.47649	0.405822	0.426683
40.947	0.377139	0.462446	0.475651	0.404949	0.426264
40.958	0.376528	0.461825	0.474811	0.404076	0.425844
40.969	0.375306	0.460583	0.473971	0.403202	0.425425
40.98	0.374694	0.459963	0.473132	0.402329	0.425005
40.991	0.374083	0.458721	0.472292	0.401456	0.424586
41.002	0.372861	0.458101	0.471453	0.400582	0.424166
41.012	0.372249	0.456859	0.470613	0.399709	0.423747
41.023	0.371027	0.456238	0.469773	0.399127	0.423327
41.034	0.370416	0.455618	0.469353	0.398253	0.422907
41.045	0.369193	0.454376	0.468514	0.39738	0.422488
41.056	0.368582	0.453755	0.467674	0.396507	0.422068
41.067	0.367359	0.452514	0.466835	0.395633	0.421649
41.078	0.366748	0.451893	0.465995	0.39476	0.421229
41.088	0.365526	0.450652	0.465155	0.393886	0.4206
41.099	0.364914	0.450031	0.464316	0.393013	0.42018
41.11	0.364303	0.44941	0.463476	0.392431	0.419761
41.121	0.363081	0.448169	0.462636	0.391557	0.419341
41.132	0.362469	0.447548	0.461797	0.390684	0.418922
41.143	0.361247	0.446307	0.460957	0.389811	0.418502
41.153	0.360636	0.445686	0.460118	0.388937	0.418083
41.164	0.359413	0.444444	0.459278	0.388064	0.417663
41.175	0.358802	0.443824	0.458438	0.387191	0.417244
41.186	0.357579	0.442582	0.457599	0.386608	0.416824
41.197	0.356968	0.441962	0.457179	0.385735	0.416195
41.208	0.355746	0.44072	0.456339	0.384862	0.415775
41.219	0.355134	0.440099	0.4555	0.383988	0.415356
41.229	0.353912	0.438858	0.45466	0.383115	0.414936
41.24	0.353301	0.438237	0.45382	0.382242	0.414516
41.251	0.352689	0.437616	0.452981	0.381368	0.414097
41.262	0.351467	0.436375	0.452141	0.380495	0.413677
41.273	0.350856	0.435754	0.451301	0.379913	0.413258
41.284	0.349633	0.434513	0.450462	0.379039	0.412628
41.295	0.349022	0.433892	0.449622	0.378166	0.412209
41.305	0.3478	0.432651	0.448783	0.377293	0.411789
41.316	0.347188	0.43203	0.447943	0.376419	0.41137
41.327	0.345966	0.430788	0.447103	0.375546	0.41095
41.338	0.345355	0.430168	0.446264	0.374672	0.410531
41.349	0.344132	0.428926	0.445424	0.37409	0.410111
41.36	0.343521	0.428305	0.444584	0.373217	0.409482
41.37	0.342298	0.427064	0.443745	0.372344	0.409062
41.381	0.341687	0.426443	0.442905	0.37147	0.408643
41.392	0.340465	0.425202	0.442065	0.370597	0.408223
41.403	0.339853	0.424581	0.441226	0.369723	0.407804
41.414	0.338631	0.42334	0.440386	0.36885	0.407384
41.425	0.33802	0.422719	0.439547	0.368268	0.406965
41.436	0.336797	0.421477	0.438707	0.367394	0.406335
41.446	0.336186	0.420857	0.437867	0.366521	0.405916
41.457	0.334963	0.419615	0.437028	0.365648	0.405496
41.468	0.334352	0.418994	0.436188	0.364774	0.405077
41.479	0.33313	0.417753	0.435348	0.363901	0.404657
41.49	0.332518	0.417132	0.434509	0.363028	0.404237
41.501	0.331296	0.415891	0.433669	0.362445	0.403608
41.511	0.330685	0.41527	0.43283	0.361572	0.403189
41.522	0.329462	0.414029	0.43199	0.360699	0.402769
41.533	0.328851	0.413408	0.43073	0.359825	0.402349
41.544	0.327628	0.412166	0.429891	0.358952	0.40193
41.555	0.327017	0.411546	0.429051	0.358079	0.401301
41.566	0.325795	0.410304	0.428212	0.357496	0.400881
41.577	0.325183	0.409683	0.427372	0.356623	0.400462
41.587	0.323961	0.408442	0.426532	0.35575	0.400042
41.598	0.32335	0.407821	0.425693	0.354876	0.399622
41.609	0.322127	0.40658	0.424853	0.354003	0.398993
41.62	0.321516	0.405959	0.424013	0.353421	0.398574
41.631	0.320293	0.404718	0.423174	0.352547	0.398154
41.642	0.319682	0.403476	0.422334	0.351674	0.397734
41.653	0.31846	0.402855	0.421495	0.350801	0.397315
41.663	0.317848	0.401614	0.420655	0.349927	0.396686
41.674	0.316626	0.400993	0.419815	0.349345	0.396266
[truncated: 3,533 more rows]

## Sheet: Saquinavir
Temperature	0uM	2 uM	4uM	8uM	16 uM
20	0.522804	0.473653	0.580122	0.634278	0.637627
20.021	0.522804	0.473653	0.580122	0.634278	0.637627
20.043	0.522804	0.473653	0.580122	0.634278	0.637627
20.064	0.522804	0.473653	0.580122	0.634278	0.637627
20.086	0.522804	0.473653	0.580122	0.634278	0.637627
20.107	0.522804	0.473653	0.580122	0.634278	0.637627
20.129	0.522804	0.473653	0.580122	0.634278	0.637627
20.15	0.522804	0.473653	0.580122	0.634278	0.637627
20.172	0.522804	0.473653	0.580122	0.634278	0.637627
20.193	0.522804	0.473653	0.580122	0.634278	0.637627
20.215	0.522804	0.473653	0.580122	0.634278	0.637627
20.236	0.522804	0.473653	0.580122	0.634278	0.637627
20.258	0.522804	0.473653	0.580122	0.634278	0.637627
20.279	0.522804	0.473653	0.580122	0.634278	0.637627
20.3	0.522804	0.473653	0.580122	0.634278	0.637627
20.322	0.522804	0.473653	0.580122	0.634278	0.637627
20.343	0.522804	0.473653	0.580122	0.634278	0.637627
20.365	0.522804	0.473653	0.580122	0.634278	0.637627
20.386	0.522804	0.473653	0.580122	0.634278	0.637627
20.408	0.522804	0.473653	0.580122	0.634278	0.637627
20.429	0.522804	0.473653	0.580122	0.634278	0.637627
20.451	0.522804	0.473653	0.580122	0.634278	0.637627
20.472	0.522804	0.473653	0.580122	0.634278	0.637627
20.494	0.522804	0.473653	0.580122	0.634278	0.637627
20.515	0.522804	0.473653	0.580122	0.634278	0.637627
20.536	0.522804	0.473653	0.580122	0.634278	0.637627
20.558	0.522804	0.473653	0.580122	0.634278	0.637627
20.579	0.522804	0.473653	0.580122	0.634278	0.637627
20.601	0.522804	0.473653	0.580122	0.634278	0.637627
20.622	0.522804	0.473653	0.580122	0.634278	0.637627
20.644	0.522804	0.473653	0.580122	0.634278	0.637627
20.665	0.522804	0.473653	0.580122	0.634278	0.637627
20.687	0.522804	0.473653	0.580122	0.634278	0.637627
20.708	0.522804	0.473653	0.580122	0.634278	0.637627
20.73	0.522804	0.473653	0.580122	0.634278	0.637966
20.751	0.522804	0.473653	0.580122	0.634278	0.637966
20.773	0.522804	0.473653	0.580122	0.634278	0.637966
20.794	0.522804	0.473653	0.580122	0.634278	0.637966
20.815	0.522804	0.473653	0.580122	0.634278	0.637966
20.837	0.522804	0.473653	0.580122	0.634278	0.637966
20.858	0.522804	0.473653	0.580122	0.634278	0.637966
20.88	0.522804	0.473653	0.580122	0.634278	0.637966
20.901	0.522804	0.473653	0.580122	0.634278	0.637966
20.923	0.522804	0.473653	0.580122	0.634278	0.637966
20.944	0.522804	0.473653	0.580122	0.634278	0.637966
20.966	0.522804	0.473653	0.580122	0.634278	0.637966
20.987	0.522804	0.473653	0.580122	0.634278	0.637966
21.009	0.522804	0.473653	0.580122	0.634278	0.637966
21.03	0.522804	0.473653	0.580122	0.634278	0.637966
21.052	0.522804	0.473653	0.580122	0.634278	0.637966
21.073	0.522804	0.473653	0.580122	0.634278	0.637966
21.094	0.522804	0.473653	0.580122	0.634278	0.637966
21.116	0.522804	0.473653	0.580122	0.634278	0.637966
21.137	0.522804	0.473653	0.580122	0.634278	0.637966
21.159	0.522804	0.473653	0.580122	0.634278	0.637966
21.18	0.522804	0.473653	0.580122	0.634278	0.637966
21.202	0.522804	0.473653	0.580122	0.634278	0.637966
21.223	0.522804	0.473653	0.580122	0.634278	0.637966
21.245	0.522804	0.473653	0.580122	0.634278	0.637966
21.266	0.522804	0.473653	0.580122	0.634278	0.637966
21.288	0.522804	0.473653	0.580122	0.634278	0.637966
21.309	0.522804	0.473653	0.580122	0.634278	0.637966
21.33	0.522804	0.473653	0.580122	0.634278	0.637966
21.352	0.522804	0.473653	0.580122	0.634278	0.637966
21.373	0.522804	0.473653	0.580122	0.634278	0.637966
21.395	0.522804	0.473653	0.580122	0.634278	0.637966
21.416	0.522804	0.473653	0.580122	0.634278	0.637966
21.438	0.522804	0.473653	0.580122	0.634278	0.637966
21.459	0.522804	0.473653	0.580122	0.634278	0.637966
21.481	0.522804	0.473653	0.580122	0.634278	0.637966
21.502	0.522804	0.473653	0.580122	0.634278	0.637966
21.524	0.522804	0.473653	0.580122	0.634278	0.637966
21.545	0.522804	0.473653	0.580122	0.634278	0.637966
21.567	0.522804	0.473653	0.580122	0.634278	0.637966
21.588	0.522804	0.473653	0.580122	0.634278	0.637966
21.609	0.522804	0.473653	0.580122	0.634278	0.637966
21.631	0.522804	0.473653	0.580122	0.634278	0.637966
21.652	0.522804	0.473653	0.580122	0.634278	0.637966
21.674	0.522804	0.473653	0.580122	0.634278	0.637966
21.695	0.522804	0.473653	0.580122	0.634278	0.637966
21.717	0.522804	0.473653	0.580122	0.634278	0.637966
21.738	0.522804	0.473653	0.580122	0.634278	0.637966
21.76	0.522804	0.473653	0.580122	0.634278	0.637966
21.781	0.522804	0.473653	0.580122	0.634278	0.637966
21.803	0.522804	0.473653	0.580122	0.634278	0.637966
21.824	0.522804	0.473653	0.580122	0.634278	0.637966
21.845	0.522804	0.473653	0.580122	0.634278	0.637966
21.867	0.522804	0.473653	0.580122	0.634278	0.637966
21.888	0.522804	0.473653	0.580122	0.634278	0.637966
21.91	0.522804	0.473653	0.580122	0.634278	0.637966
21.931	0.522804	0.473653	0.580122	0.634278	0.637966
21.953	0.522804	0.474245	0.580122	0.634278	0.637966
21.974	0.522804	0.474245	0.580122	0.634278	0.637966
21.996	0.522804	0.474245	0.580122	0.634278	0.637966
22.017	0.522804	0.474245	0.580122	0.634278	0.637966
22.039	0.522804	0.474245	0.580122	0.634278	0.637966
22.06	0.522804	0.474245	0.580122	0.634278	0.637966
22.082	0.522804	0.474245	0.580122	0.634278	0.637966
22.103	0.522804	0.474245	0.580122	0.634278	0.637966
22.124	0.522804	0.474245	0.580122	0.634278	0.637966
22.146	0.522804	0.474245	0.580122	0.634278	0.637966
22.167	0.522804	0.474245	0.580122	0.634278	0.637966
22.189	0.522804	0.474245	0.580122	0.634278	0.637966
22.21	0.522804	0.474245	0.580122	0.634278	0.637966
22.232	0.522804	0.474245	0.580122	0.634278	0.637966
22.253	0.522804	0.474245	0.580122	0.634278	0.637966
22.275	0.522804	0.474245	0.580122	0.634278	0.637966
22.296	0.522804	0.474245	0.580122	0.634278	0.637966
22.318	0.522804	0.474245	0.580122	0.634278	0.637966
22.339	0.522804	0.474245	0.580122	0.634278	0.637966
22.361	0.522804	0.474245	0.580122	0.634278	0.637966
22.382	0.522804	0.474245	0.580122	0.634278	0.637966
22.403	0.522804	0.474245	0.580122	0.634278	0.637966
22.425	0.522804	0.474245	0.580122	0.634278	0.637966
22.446	0.522804	0.474245	0.580122	0.634278	0.637966
22.468	0.522804	0.474245	0.580122	0.634278	0.637966
22.489	0.522804	0.474245	0.580122	0.634278	0.637966
22.511	0.522804	0.474245	0.580122	0.634278	0.637966
22.532	0.522804	0.474245	0.580122	0.634278	0.637966
22.554	0.522804	0.474245	0.580122	0.634278	0.637966
22.575	0.522804	0.474245	0.580122	0.634278	0.637966
22.597	0.522804	0.474245	0.580122	0.634278	0.637966
22.618	0.522804	0.474245	0.580122	0.634278	0.637966
22.639	0.522804	0.474245	0.580122	0.634278	0.637966
22.661	0.522804	0.474245	0.580122	0.634278	0.637966
22.682	0.522804	0.474245	0.580122	0.634278	0.637966
22.704	0.522804	0.474245	0.580122	0.634278	0.637966
22.725	0.522804	0.474245	0.580122	0.634278	0.637966
22.747	0.522804	0.474245	0.580122	0.634278	0.637966
22.768	0.522804	0.474245	0.580122	0.634278	0.637966
22.79	0.522804	0.474245	0.580122	0.634278	0.637966
22.811	0.522804	0.474245	0.580122	0.634278	0.637966
22.833	0.522804	0.474245	0.580122	0.634278	0.637966
22.854	0.522804	0.474245	0.580122	0.634278	0.637966
22.876	0.522804	0.474245	0.580122	0.634278	0.637627
22.897	0.522804	0.474245	0.580122	0.634278	0.637627
22.918	0.522804	0.474245	0.580122	0.634278	0.637627
22.94	0.522804	0.474245	0.580122	0.634278	0.637627
22.961	0.522804	0.474245	0.580122	0.634278	0.637627
22.983	0.522804	0.474245	0.580122	0.634278	0.637627
23.004	0.522804	0.474245	0.580122	0.634278	0.637627
23.026	0.522804	0.474245	0.580122	0.634278	0.637627
23.047	0.522804	0.474245	0.580122	0.634278	0.637627
23.069	0.522804	0.474245	0.580122	0.634278	0.637627
23.09	0.522804	0.474837	0.580122	0.634278	0.637627
23.112	0.522804	0.474837	0.580122	0.634278	0.637627
23.133	0.522804	0.474837	0.580122	0.634278	0.637627
23.155	0.522804	0.474837	0.580122	0.634278	0.637288
23.176	0.522804	0.474837	0.580122	0.634278	0.637288
23.197	0.522804	0.474837	0.580122	0.634278	0.637288
23.219	0.522804	0.474837	0.580122	0.634278	0.637288
23.24	0.522804	0.474837	0.580122	0.634278	0.637288
23.262	0.522804	0.474837	0.580122	0.634278	0.637288
23.283	0.522804	0.474837	0.580122	0.634278	0.636949
23.305	0.522804	0.475429	0.580122	0.634278	0.636949
23.326	0.522804	0.475429	0.580122	0.634278	0.636949
23.348	0.522804	0.475429	0.580122	0.634278	0.636949
23.369	0.522804	0.475429	0.580122	0.634278	0.636949
23.391	0.522804	0.475429	0.580122	0.634278	0.636949
23.412	0.522804	0.475429	0.580122	0.634278	0.63661
23.433	0.522804	0.475429	0.580122	0.634278	0.63661
23.455	0.522804	0.475429	0.580122	0.634278	0.63661
23.476	0.522804	0.476021	0.580122	0.634278	0.63661
23.498	0.522804	0.476021	0.580122	0.634278	0.63661
23.519	0.522804	0.476021	0.580122	0.634278	0.63661
23.541	0.522804	0.476021	0.580122	0.634278	0.636271
23.562	0.522804	0.476021	0.580122	0.634278	0.636271
23.584	0.522804	0.476021	0.580122	0.634278	0.636271
23.605	0.522804	0.476613	0.580122	0.634278	0.636271
23.627	0.522804	0.476613	0.580122	0.634278	0.636271
23.648	0.522804	0.476613	0.580122	0.634278	0.635932
23.67	0.522804	0.476613	0.580122	0.634278	0.635932
23.691	0.522804	0.476613	0.580122	0.634278	0.635932
23.712	0.522804	0.476613	0.580122	0.634278	0.635932
23.734	0.522804	0.477205	0.580122	0.634278	0.635932
23.755	0.522804	0.477205	0.580122	0.634278	0.635593
23.777	0.522804	0.477205	0.580122	0.634278	0.635593
23.798	0.522804	0.477205	0.580122	0.634278	0.635593
23.82	0.522804	0.477798	0.580122	0.634278	0.635593
23.841	0.522804	0.477798	0.580122	0.634278	0.635593
23.863	0.522804	0.477798	0.580122	0.634278	0.635254
23.884	0.522804	0.477798	0.580122	0.634278	0.635254
23.906	0.522804	0.477798	0.580122	0.634278	0.635254
23.927	0.522804	0.47839	0.580122	0.634278	0.635254
23.948	0.522804	0.47839	0.580122	0.634278	0.634915
23.97	0.522804	0.47839	0.580122	0.634278	0.634915
23.991	0.522804	0.478982	0.580122	0.634278	0.634915
24.013	0.522804	0.478982	0.580122	0.634278	0.634915
24.034	0.522804	0.478982	0.580122	0.634278	0.634915
24.056	0.522804	0.478982	0.580122	0.634278	0.634576
24.077	0.522804	0.479574	0.580122	0.634278	0.634576
24.099	0.522804	0.479574	0.580122	0.634278	0.634576
24.12	0.522804	0.479574	0.580122	0.634278	0.634576
24.142	0.522804	0.480166	0.580122	0.634278	0.634237
24.163	0.522804	0.480166	0.580122	0.634278	0.634237
24.185	0.522804	0.480166	0.580122	0.634278	0.634237
24.206	0.522804	0.480166	0.580122	0.634278	0.634237
24.227	0.522804	0.480758	0.580122	0.634278	0.633898
24.249	0.522804	0.480758	0.580122	0.634278	0.633898
24.27	0.522804	0.480758	0.580122	0.634278	0.633898
24.292	0.522804	0.48135	0.580122	0.634278	0.633898
24.313	0.522804	0.48135	0.580122	0.634278	0.633559
24.335	0.522804	0.481942	0.580122	0.634278	0.633559
24.356	0.522804	0.481942	0.580122	0.634278	0.633559
24.378	0.522804	0.481942	0.580122	0.634278	0.63322
24.399	0.522804	0.482534	0.580122	0.634278	0.63322
24.421	0.522804	0.482534	0.580122	0.634278	0.63322
24.442	0.522804	0.483126	0.580122	0.634278	0.63322
24.464	0.522804	0.483126	0.580122	0.634278	0.632881
24.485	0.522804	0.483126	0.580122	0.634278	0.632881
24.506	0.522804	0.483718	0.580122	0.634278	0.632881
24.528	0.522804	0.483718	0.580122	0.634278	0.632881
24.549	0.522804	0.48431	0.580122	0.634278	0.632542
24.571	0.522804	0.48431	0.580122	0.634278	0.632542
24.592	0.522804	0.484902	0.580122	0.634278	0.632542
24.614	0.522804	0.484902	0.580122	0.634278	0.632203
24.635	0.522804	0.485494	0.580122	0.634278	0.632203
24.657	0.522804	0.485494	0.580122	0.634278	0.632203
24.678	0.522804	0.486086	0.580122	0.634278	0.631864
24.7	0.522804	0.486086	0.580122	0.634278	0.631864
24.721	0.522804	0.486679	0.580122	0.634278	0.631864
24.742	0.522804	0.486679	0.580122	0.634278	0.631525
24.764	0.522804	0.487271	0.580122	0.634278	0.631525
24.785	0.522804	0.487271	0.580798	0.634278	0.631525
24.807	0.522804	0.487863	0.580798	0.634278	0.631525
24.828	0.522804	0.487863	0.580798	0.634278	0.631186
24.85	0.522804	0.488455	0.580798	0.634278	0.631186
24.871	0.522804	0.488455	0.580798	0.634278	0.631186
24.893	0.522804	0.489047	0.580798	0.634278	0.630847
24.914	0.522804	0.489639	0.580798	0.634278	0.630847
24.936	0.522804	0.489639	0.580798	0.634278	0.630847
24.957	0.522804	0.490231	0.580798	0.634278	0.630508
24.979	0.522804	0.490231	0.580798	0.634278	0.630508
25	0.522804	0.490823	0.580798	0.634278	0.630508
25.021	0.522804	0.491415	0.580798	0.634278	0.630169
25.043	0.522804	0.491415	0.580798	0.634278	0.630169
25.064	0.522804	0.492007	0.580798	0.634278	0.630169
25.086	0.522804	0.492599	0.580798	0.634278	0.629831
25.107	0.522804	0.492599	0.580798	0.634278	0.629831
25.129	0.522804	0.493191	0.580798	0.634278	0.629831
25.15	0.522804	0.493783	0.580798	0.634278	0.629492
25.172	0.522804	0.494375	0.580798	0.634278	0.629492
25.193	0.522804	0.494375	0.580798	0.634278	0.629492
25.215	0.522804	0.494967	0.580798	0.634278	0.629492
25.236	0.522804	0.49556	0.580798	0.634278	0.629153
25.258	0.522804	0.49556	0.580798	0.634278	0.629153
25.279	0.522804	0.496152	0.580798	0.634278	0.629153
25.3	0.522804	0.496744	0.580798	0.634278	0.628814
25.322	0.522804	0.497336	0.580798	0.634278	0.628814
25.343	0.522804	0.497928	0.580798	0.634278	0.628814
25.365	0.522804	0.497928	0.580798	0.634278	0.628475
25.386	0.522804	0.49852	0.580798	0.634278	0.628475
25.408	0.522804	0.499112	0.581474	0.634953	0.628475
25.429	0.522804	0.499704	0.581474	0.634953	0.628475
25.451	0.522804	0.500296	0.581474	0.634953	0.628136
25.472	0.522804	0.500296	0.581474	0.634953	0.628136
25.494	0.522804	0.500888	0.581474	0.634953	0.628136
25.515	0.522804	0.50148	0.581474	0.634953	0.628136
25.536	0.522804	0.502072	0.581474	0.634953	0.627797
25.558	0.522804	0.502664	0.581474	0.634953	0.627797
25.579	0.522804	0.503256	0.581474	0.634953	0.627797
25.601	0.522804	0.503848	0.581474	0.634953	0.627797
25.622	0.522804	0.50444	0.581474	0.634953	0.627458
25.644	0.522804	0.50444	0.58215	0.634953	0.627458
25.665	0.522804	0.505033	0.58215	0.634953	0.627458
25.687	0.522804	0.505625	0.58215	0.634953	0.627458
25.708	0.522804	0.506217	0.58215	0.634953	0.627458
25.73	0.523649	0.506809	0.58215	0.634953	0.627119
25.751	0.523649	0.507401	0.58215	0.634953	0.627119
25.773	0.523649	0.507993	0.58215	0.634953	0.627119
25.794	0.523649	0.508585	0.58215	0.634953	0.627119
25.815	0.523649	0.509177	0.58215	0.635628	0.627119
25.837	0.523649	0.509769	0.582826	0.635628	0.627119
25.858	0.523649	0.510361	0.582826	0.635628	0.627119
25.88	0.523649	0.510953	0.582826	0.635628	0.62678
25.901	0.523649	0.511545	0.582826	0.635628	0.62678
25.923	0.523649	0.512137	0.582826	0.635628	0.62678
25.944	0.523649	0.512729	0.582826	0.635628	0.62678
25.966	0.523649	0.513321	0.583502	0.635628	0.62678
25.987	0.523649	0.513914	0.583502	0.635628	0.62678
26.009	0.523649	0.514506	0.583502	0.635628	0.62678
26.03	0.523649	0.515098	0.583502	0.635628	0.62678
26.052	0.523649	0.51569	0.583502	0.635628	0.62678
26.073	0.523649	0.516282	0.583502	0.636302	0.62678
26.094	0.523649	0.517466	0.584178	0.636302	0.62678
26.116	0.523649	0.518058	0.584178	0.636302	0.62678
26.137	0.523649	0.51865	0.584178	0.636302	0.62678
26.159	0.523649	0.519242	0.584178	0.636302	0.62678
26.18	0.524493	0.519834	0.584178	0.636302	0.627119
26.202	0.524493	0.520426	0.584178	0.636302	0.627119
26.223	0.524493	0.521018	0.584855	0.636302	0.627119
26.245	0.524493	0.52161	0.584855	0.636302	0.627119
26.266	0.524493	0.522202	0.584855	0.636977	0.627119
26.288	0.524493	0.522795	0.584855	0.636977	0.627119
26.309	0.524493	0.523979	0.585531	0.636977	0.627458
26.33	0.524493	0.524571	0.585531	0.636977	0.627458
26.352	0.524493	0.525163	0.585531	0.636977	0.627458
26.373	0.524493	0.525755	0.585531	0.636977	0.627458
26.395	0.524493	0.526347	0.585531	0.636977	0.627797
26.416	0.525338	0.526939	0.586207	0.637652	0.627797
26.438	0.525338	0.528123	0.586207	0.637652	0.627797
26.459	0.525338	0.528715	0.586207	0.637652	0.627797
26.481	0.525338	0.529307	0.586207	0.637652	0.628136
26.502	0.525338	0.529899	0.586883	0.637652	0.628136
26.524	0.525338	0.530491	0.586883	0.637652	0.628475
26.545	0.525338	0.531676	0.586883	0.638327	0.628475
26.567	0.526182	0.532268	0.586883	0.638327	0.628475
26.588	0.526182	0.53286	0.587559	0.638327	0.628814
26.609	0.526182	0.533452	0.587559	0.638327	0.628814
26.631	0.526182	0.534636	0.587559	0.638327	0.629153
26.652	0.526182	0.535228	0.587559	0.639001	0.629153
26.674	0.526182	0.53582	0.588235	0.639001	0.629492
26.695	0.526182	0.536412	0.588235	0.639001	0.629492
26.717	0.527027	0.537596	0.588235	0.639001	0.629831
26.738	0.527027	0.538188	0.588911	0.639001	0.630169
26.76	0.527027	0.53878	0.588911	0.639676	0.630169
26.781	0.527027	0.539372	0.588911	0.639676	0.630508
26.803	0.527027	0.540557	0.588911	0.639676	0.630508
26.824	0.527872	0.541149	0.589588	0.639676	0.630847
26.845	0.527872	0.541741	0.589588	0.639676	0.631186
26.867	0.527872	0.542925	0.589588	0.640351	0.631525
26.888	0.527872	0.543517	0.590264	0.640351	0.631525
26.91	0.527872	0.544109	0.590264	0.640351	0.631864
26.931	0.528716	0.545293	0.590264	0.640351	0.632203
26.953	0.528716	0.545885	0.59094	0.641026	0.632542
26.974	0.528716	0.546477	0.59094	0.641026	0.632542
26.996	0.528716	0.547661	0.59094	0.641026	0.632881
27.017	0.529561	0.548253	0.591616	0.641026	0.63322
27.039	0.529561	0.548845	0.591616	0.6417	0.633559
27.06	0.529561	0.55003	0.591616	0.6417	0.633898
27.082	0.529561	0.550622	0.592292	0.6417	0.634237
27.103	0.530405	0.551214	0.592292	0.6417	0.634576
27.124	0.530405	0.552398	0.592292	0.642375	0.634576
27.146	0.530405	0.55299	0.592968	0.642375	0.634915
27.167	0.530405	0.554174	0.592968	0.642375	0.635254
27.189	0.53125	0.554766	0.592968	0.642375	0.635593
27.21	0.53125	0.555358	0.593644	0.64305	0.635932
27.232	0.53125	0.556542	0.593644	0.64305	0.636271
27.253	0.532095	0.557134	0.593644	0.64305	0.63661
27.275	0.532095	0.558319	0.59432	0.643725	0.636949
27.296	0.532095	0.558911	0.59432	0.643725	0.637627
27.318	0.532939	0.559503	0.59432	0.643725	0.637966
27.339	0.532939	0.560687	0.594997	0.643725	0.638305
27.361	0.532939	0.561279	0.594997	0.644399	0.638644
27.382	0.532939	0.562463	0.595673	0.644399	0.638983
27.403	0.533784	0.563055	0.595673	0.644399	0.639322
27.425	0.533784	0.564239	0.595673	0.645074	0.639661
27.446	0.533784	0.564831	0.596349	0.645074	0.64
27.468	0.534628	0.566015	0.596349	0.645074	0.640678
27.489	0.534628	0.566607	0.597025	0.645749	0.641017
27.511	0.535473	0.5672	0.597025	0.645749	0.641356
27.532	0.535473	0.568384	0.597025	0.645749	0.641695
27.554	0.535473	0.568976	0.597701	0.646424	0.642373
27.575	0.536318	0.57016	0.597701	0.646424	0.642712
27.597	0.536318	0.570752	0.598377	0.646424	0.643051
27.618	0.536318	0.571936	0.598377	0.647099	0.643729
27.639	0.537162	0.572528	0.599053	0.647099	0.644068
27.661	0.537162	0.573712	0.599053	0.647099	0.644407
27.682	0.538007	0.574304	0.599053	0.647773	0.645085
27.704	0.538007	0.575488	0.59973	0.647773	0.645424
27.725	0.538007	0.576081	0.59973	0.647773	0.645763
27.747	0.538851	0.577265	0.600406	0.648448	0.646441
27.768	0.538851	0.577857	0.600406	0.648448	0.64678
27.79	0.539696	0.579041	0.601082	0.648448	0.647458
27.811	0.539696	0.579633	0.601082	0.649123	0.647797
27.833	0.540541	0.580817	0.601758	0.649123	0.648475
27.854	0.540541	0.582001	0.601758	0.649123	0.648814
27.876	0.540541	0.582593	0.602434	0.649798	0.649492
27.897	0.541385	0.583777	0.602434	0.649798	0.649831
27.918	0.541385	0.584369	0.602434	0.649798	0.650508
27.94	0.54223	0.585554	0.60311	0.650472	0.650847
27.961	0.54223	0.586146	0.60311	0.650472	0.651525
27.983	0.543074	0.58733	0.603786	0.651147	0.651864
28.004	0.543074	0.587922	0.603786	0.651147	0.652542
28.026	0.543919	0.589106	0.604462	0.651147	0.65322
28.047	0.543919	0.589698	0.604462	0.651822	0.653559
28.069	0.544764	0.590882	0.605139	0.651822	0.654237
28.09	0.544764	0.592066	0.605139	0.652497	0.654576
28.112	0.545608	0.592658	0.605815	0.652497	0.655254
28.133	0.545608	0.593843	0.605815	0.652497	0.655932
28.155	0.546453	0.594435	0.606491	0.653171	0.65661
28.176	0.546453	0.595619	0.607167	0.653171	0.656949
28.197	0.547297	0.596211	0.607167	0.653846	0.657627
28.219	0.547297	0.597395	0.607843	0.653846	0.658305
28.24	0.548142	0.598579	0.607843	0.653846	0.658644
28.262	0.548142	0.599171	0.608519	0.654521	0.659322
28.283	0.548986	0.600355	0.608519	0.654521	0.66
28.305	0.548986	0.600947	0.609195	0.655196	0.660678
28.326	0.549831	0.602131	0.609195	0.655196	0.661356
28.348	0.549831	0.602724	0.609872	0.65587	0.662034
28.369	0.550676	0.603908	0.609872	0.65587	0.662373
28.391	0.550676	0.605092	0.610548	0.65587	0.663051
28.412	0.55152	0.605684	0.611224	0.656545	0.663729
28.433	0.55152	0.606868	0.611224	0.656545	0.664407
28.455	0.552365	0.60746	0.6119	0.65722	0.665085
28.476	0.553209	0.608644	0.6119	0.65722	0.665763
28.498	0.553209	0.609236	0.612576	0.657895	0.666441
28.519	0.554054	0.61042	0.612576	0.657895	0.667119
28.541	0.554054	0.611012	0.613252	0.65857	0.667797
28.562	0.554899	0.612197	0.613928	0.65857	0.668475
28.584	0.554899	0.613381	0.613928	0.65857	0.668814
28.605	0.555743	0.613973	0.614604	0.659244	0.669492
28.627	0.556588	0.615157	0.614604	0.659244	0.670169
28.648	0.556588	0.615749	0.615281	0.659919	0.670847
28.67	0.557432	0.616933	0.615281	0.659919	0.671525
28.691	0.557432	0.617525	0.615957	0.660594	0.672203
28.712	0.558277	0.618709	0.616633	0.660594	0.672881
28.734	0.559122	0.619301	0.616633	0.661269	0.673559
28.755	0.559122	0.620485	0.617309	0.661269	0.674237
28.777	0.559966	0.62167	0.617309	0.661943	0.675254
28.798	0.559966	0.622262	0.617985	0.661943	0.675932
28.82	0.560811	0.623446	0.618661	0.662618	0.67661
28.841	0.561655	0.624038	0.618661	0.662618	0.677288
28.863	0.561655	0.625222	0.619337	0.663293	0.677966
28.884	0.5625	0.625814	0.620014	0.663293	0.678644
28.906	0.563345	0.626998	0.620014	0.663968	0.679322
28.927	0.563345	0.62759	0.62069	0.663968	0.68
28.948	0.564189	0.628774	0.62069	0.664642	0.680678
28.97	0.564189	0.629366	0.621366	0.664642	0.681356
28.991	0.565034	0.630551	0.622042	0.665317	0.682034
29.013	0.565878	0.631143	0.622042	0.665317	0.682712
29.034	0.565878	0.632327	0.622718	0.665992	0.68339
29.056	0.566723	0.632919	0.622718	0.665992	0.684068
29.077	0.567568	0.634103	0.623394	0.666667	0.684746
29.099	0.567568	0.634695	0.62407	0.666667	0.685763
29.12	0.568412	0.635879	0.62407	0.667341	0.686441
29.142	0.568412	0.636471	0.624746	0.667341	0.687119
29.163	0.569257	0.637655	0.625423	0.668016	0.687797
29.185	0.570101	0.638247	0.625423	0.668016	0.688475
29.206	0.570101	0.639432	0.626099	0.668691	0.689153
29.227	0.570946	0.640024	0.626099	0.668691	0.689831
29.249	0.571791	0.641208	0.626775	0.669366	0.690508
29.27	0.571791	0.6418	0.627451	0.67004	0.691186
29.292	0.572635	0.642984	0.627451	0.67004	0.691864
29.313	0.57348	0.643576	0.628127	0.670715	0.692542
29.335	0.57348	0.64476	0.628803	0.670715	0.69322
29.356	0.574324	0.645352	0.628803	0.67139	0.693898
29.378	0.575169	0.646536	0.629479	0.67139	0.694576
29.399	0.575169	0.647128	0.629479	0.672065	0.695254
29.421	0.576014	0.648313	0.630156	0.672065	0.695932
29.442	0.576858	0.648905	0.630832	0.67274	0.69661
29.464	0.576858	0.650089	0.630832	0.67274	0.697288
29.485	0.577703	0.650681	0.631508	0.673414	0.697966
29.506	0.577703	0.651865	0.632184	0.674089	0.698644
29.528	0.578547	0.652457	0.632184	0.674089	0.699322
29.549	0.579392	0.653641	0.63286	0.674764	0.7
29.571	0.579392	0.654233	0.63286	0.674764	0.700678
29.592	0.580236	0.654825	0.633536	0.675439	0.701356
29.614	0.581081	0.656009	0.634212	0.675439	0.702034
29.635	0.581081	0.656602	0.634212	0.676113	0.702712
29.657	0.581926	0.657786	0.634888	0.676788	0.703051
29.678	0.58277	0.658378	0.635565	0.676788	0.703729
29.7	0.58277	0.659562	0.635565	0.677463	0.704407
29.721	0.583615	0.660154	0.636241	0.677463	0.705085
29.742	0.584459	0.661338	0.636241	0.678138	0.705763
29.764	0.584459	0.66193	0.636917	0.678138	0.706441
29.785	0.585304	0.663114	0.637593	0.678812	0.70678
29.807	0.585304	0.663706	0.637593	0.679487	0.707458
29.828	0.586149	0.664298	0.638269	0.679487	0.708136
29.85	0.586993	0.665483	0.638945	0.680162	0.708814
29.871	0.586993	0.666075	0.638945	0.680162	0.709153
29.893	0.587838	0.667259	0.639621	0.680837	0.709831
29.914	0.588682	0.667851	0.639621	0.680837	0.710508
29.936	0.588682	0.669035	0.640297	0.681511	0.710847
29.957	0.589527	0.669627	0.640974	0.682186	0.711525
29.979	0.589527	0.670811	0.640974	0.682186	0.712203
30	0.590372	0.671403	0.64165	0.682861	0.712542
30.021	0.591216	0.671995	0.642326	0.682861	0.71322
30.043	0.591216	0.673179	0.642326	0.683536	0.713559
30.064	0.592061	0.673771	0.643002	0.683536	0.714237
30.086	0.592061	0.674956	0.643002	0.684211	0.714576
30.107	0.592905	0.675548	0.643678	0.684211	0.715254
30.129	0.59375	0.676732	0.644354	0.684885	0.715593
30.15	0.59375	0.677324	0.644354	0.68556	0.716271
30.172	0.594595	0.677916	0.64503	0.68556	0.71661
30.193	0.594595	0.6791	0.645707	0.686235	0.716949
30.215	0.595439	0.679692	0.645707	0.686235	0.717627
30.236	0.595439	0.680876	0.646383	0.68691	0.717966
30.258	0.596284	0.681468	0.646383	0.68691	0.718644
30.279	0.597128	0.68206	0.647059	0.687584	0.718983
30.3	0.597128	0.683245	0.647735	0.688259	0.719322
30.322	0.597973	0.683837	0.647735	0.688259	0.719661
30.343	0.597973	0.684429	0.648411	0.688934	0.720339
30.365	0.598818	0.685613	0.649087	0.688934	0.720678
30.386	0.598818	0.686205	0.649087	0.689609	0.721017
30.408	0.599662	0.687389	0.649763	0.689609	0.721356
30.429	0.600507	0.687981	0.649763	0.690283	0.721695
30.451	0.600507	0.688573	0.650439	0.690958	0.722373
30.472	0.601351	0.689757	0.651116	0.690958	0.722712
30.494	0.601351	0.690349	0.651116	0.691633	0.723051
30.515	0.602196	0.690941	0.651792	0.691633	0.72339
30.536	0.602196	0.692126	0.652468	0.692308	0.723729
30.558	0.603041	0.692718	0.652468	0.692308	0.724068
30.579	0.603041	0.69331	0.653144	0.692982	0.724407
30.601	0.603885	0.693902	0.653144	0.692982	0.724746
30.622	0.603885	0.695086	0.65382	0.693657	0.725085
30.644	0.60473	0.695678	0.654496	0.694332	0.725424
30.665	0.60473	0.69627	0.654496	0.694332	0.725763
30.687	0.605574	0.697454	0.655172	0.695007	0.726102
30.708	0.605574	0.698046	0.655849	0.695007	0.726441
30.73	0.606419	0.698638	0.655849	0.695682	0.72678
30.751	0.606419	0.69923	0.656525	0.695682	0.72678
30.773	0.607264	0.700414	0.656525	0.696356	0.727119
30.794	0.607264	0.701007	0.657201	0.696356	0.727458
30.815	0.608108	0.701599	0.657877	0.697031	0.727797
30.837	0.608108	0.702191	0.657877	0.697706	0.728136
30.858	0.608953	0.702783	0.658553	0.697706	0.728136
30.88	0.608953	0.703375	0.658553	0.698381	0.728475
30.901	0.609797	0.704559	0.659229	0.698381	0.728814
30.923	0.609797	0.705151	0.659905	0.699055	0.728814
30.944	0.610642	0.705743	0.659905	0.699055	0.729153
30.966	0.610642	0.706335	0.660581	0.69973	0.729492
30.987	0.611486	0.706927	0.660581	0.69973	0.729492
31.009	0.611486	0.707519	0.661258	0.700405	0.729831
31.03	0.612331	0.708111	0.661934	0.700405	0.730169
31.052	0.612331	0.708703	0.661934	0.70108	0.730169
31.073	0.613176	0.709295	0.66261	0.701754	0.730508
31.094	0.613176	0.71048	0.66261	0.701754	0.730508
31.116	0.613176	0.711072	0.663286	0.702429	0.730847
31.137	0.61402	0.711664	0.663962	0.702429	0.730847
31.159	0.61402	0.712256	0.663962	0.703104	0.731186
31.18	0.614865	0.712848	0.664638	0.703104	0.731186
31.202	0.614865	0.71344	0.664638	0.703779	0.731186
31.223	0.615709	0.714032	0.665314	0.703779	0.731525
31.245	0.615709	0.714624	0.665314	0.704453	0.731525
31.266	0.615709	0.714624	0.665991	0.704453	0.731525
31.288	0.616554	0.715216	0.666667	0.705128	0.731864
31.309	0.616554	0.715808	0.666667	0.705128	0.731864
31.33	0.617399	0.7164	0.667343	0.705803	0.731864
31.352	0.617399	0.716992	0.667343	0.705803	0.732203
31.373	0.617399	0.717584	0.668019	0.706478	0.732203
31.395	0.618243	0.718176	0.668019	0.706478	0.732203
31.416	0.618243	0.718769	0.668695	0.707152	0.732203
31.438	0.619088	0.719361	0.668695	0.707152	0.732203
31.459	0.619088	0.719361	0.669371	0.707827	0.732542
31.481	0.619088	0.719953	0.670047	0.707827	0.732542
31.502	0.619932	0.720545	0.670047	0.708502	0.732542
31.524	0.619932	0.721137	0.670723	0.708502	0.732542
31.545	0.619932	0.721729	0.670723	0.709177	0.732542
31.567	0.620777	0.721729	0.6714	0.709177	0.732542
31.588	0.620777	0.722321	0.6714	0.709852	0.732542
31.609	0.620777	0.722913	0.672076	0.709852	0.732542
31.631	0.621622	0.722913	0.672076	0.710526	0.732542
31.652	0.621622	0.723505	0.672752	0.710526	0.732542
31.674	0.622466	0.724097	0.672752	0.711201	0.732542
31.695	0.622466	0.724689	0.673428	0.711201	0.732542
31.717	0.622466	0.724689	0.673428	0.711876	0.732542
31.738	0.623311	0.725281	0.674104	0.711876	0.732542
31.76	0.623311	0.725281	0.674104	0.712551	0.732542
31.781	0.623311	0.725873	0.67478	0.712551	0.732203
31.803	0.623311	0.726465	0.67478	0.713225	0.732203
31.824	0.624155	0.726465	0.675456	0.713225	0.732203
31.845	0.624155	0.727057	0.675456	0.7139	0.732203
31.867	0.624155	0.727057	0.675456	0.7139	0.732203
31.888	0.625	0.727649	0.676133	0.7139	0.732203
31.91	0.625	0.728242	0.676133	0.714575	0.731864
31.931	0.625	0.728242	0.676809	0.714575	0.731864
31.953	0.625845	0.728834	0.676809	0.71525	0.731864
31.974	0.625845	0.728834	0.677485	0.71525	0.731864
31.996	0.625845	0.729426	0.677485	0.715924	0.731525
32.017	0.625845	0.729426	0.677485	0.715924	0.731525
32.039	0.626689	0.729426	0.678161	0.715924	0.731525
32.06	0.626689	0.730018	0.678161	0.716599	0.731186
32.082	0.626689	0.730018	0.678837	0.716599	0.731186
32.103	0.626689	0.73061	0.678837	0.717274	0.731186
32.124	0.627534	0.73061	0.678837	0.717274	0.730847
32.146	0.627534	0.731202	0.679513	0.717274	0.730847
32.167	0.627534	0.731202	0.679513	0.717949	0.730508
32.189	0.627534	0.731202	0.680189	0.717949	0.730508
32.21	0.628378	0.731794	0.680189	0.718623	0.730508
32.232	0.628378	0.731794	0.680189	0.718623	0.730169
32.253	0.628378	0.731794	0.680865	0.718623	0.730169
32.275	0.628378	0.732386	0.680865	0.719298	0.729831
32.296	0.628378	0.732386	0.680865	0.719298	0.729831
32.318	0.629223	0.732386	0.681542	0.719298	0.729492
32.339	0.629223	0.732386	0.681542	0.719973	0.729492
32.361	0.629223	0.732978	0.681542	0.719973	0.729153
32.382	0.629223	0.732978	0.682218	0.719973	0.729153
32.403	0.629223	0.732978	0.682218	0.720648	0.728814
32.425	0.630068	0.732978	0.682218	0.720648	0.728814
32.446	0.630068	0.73357	0.682218	0.720648	0.728475
32.468	0.630068	0.73357	0.682894	0.721323	0.728136
32.489	0.630068	0.73357	0.682894	0.721323	0.728136
32.511	0.630068	0.73357	0.682894	0.721323	0.727797
32.532	0.630912	0.73357	0.682894	0.721323	0.727797
32.554	0.630912	0.73357	0.68357	0.721997	0.727458
32.575	0.630912	0.734162	0.68357	0.721997	0.727119
32.597	0.630912	0.734162	0.68357	0.721997	0.727119
32.618	0.630912	0.734162	0.68357	0.722672	0.72678
32.639	0.630912	0.734162	0.684246	0.722672	0.72678
32.661	0.630912	0.734162	0.684246	0.722672	0.726441
32.682	0.631757	0.734162	0.684246	0.722672	0.726102
32.704	0.631757	0.734162	0.684246	0.723347	0.726102
32.725	0.631757	0.734162	0.684246	0.723347	0.725763
32.747	0.631757	0.734162	0.684922	0.723347	0.725424
32.768	0.631757	0.734162	0.684922	0.723347	0.725424
32.79	0.631757	0.734162	0.684922	0.723347	0.725085
32.811	0.631757	0.734162	0.684922	0.724022	0.724746
32.833	0.631757	0.734162	0.684922	0.724022	0.724746
32.854	0.632601	0.734162	0.684922	0.724022	0.724407
32.876	0.632601	0.734162	0.685598	0.724022	0.724068
32.897	0.632601	0.734162	0.685598	0.724022	0.724068
32.918	0.632601	0.734162	0.685598	0.724022	0.723729
32.94	0.632601	0.734162	0.685598	0.724696	0.72339
32.961	0.632601	0.734162	0.685598	0.724696	0.72339
32.983	0.632601	0.73357	0.685598	0.724696	0.723051
33.004	0.632601	0.73357	0.685598	0.724696	0.722712
33.026	0.632601	0.73357	0.685598	0.724696	0.722712
33.047	0.632601	0.73357	0.685598	0.724696	0.722373
33.069	0.632601	0.73357	0.686275	0.724696	0.722034
33.09	0.632601	0.732978	0.686275	0.724696	0.722034
33.112	0.632601	0.732978	0.686275	0.725371	0.721695
33.133	0.632601	0.732978	0.686275	0.725371	0.721356
33.155	0.632601	0.732978	0.686275	0.725371	0.721356
33.176	0.632601	0.732386	0.686275	0.725371	0.721017
33.197	0.632601	0.732386	0.686275	0.725371	0.720678
33.219	0.632601	0.732386	0.686275	0.725371	0.720339
33.24	0.632601	0.732386	0.686275	0.725371	0.720339
33.262	0.632601	0.731794	0.686275	0.725371	0.72
33.283	0.632601	0.731794	0.686275	0.725371	0.719661
33.305	0.632601	0.731794	0.686275	0.725371	0.719661
33.326	0.632601	0.731202	0.686275	0.725371	0.719322
33.348	0.632601	0.731202	0.686275	0.725371	0.718983
33.369	0.632601	0.73061	0.686275	0.725371	0.718983
33.391	0.632601	0.73061	0.686275	0.725371	0.718644
33.412	0.632601	0.73061	0.686275	0.725371	0.718305
33.433	0.632601	0.730018	0.686275	0.725371	0.718305
33.455	0.632601	0.730018	0.686275	0.725371	0.717966
33.476	0.632601	0.729426	0.686275	0.725371	0.717627
33.498	0.632601	0.729426	0.685598	0.725371	0.717627
33.519	0.632601	0.728834	0.685598	0.725371	0.717288
33.541	0.632601	0.728834	0.685598	0.725371	0.716949
33.562	0.632601	0.728242	0.685598	0.725371	0.716949
33.584	0.632601	0.728242	0.685598	0.725371	0.71661
33.605	0.632601	0.727649	0.685598	0.725371	0.716271
33.627	0.632601	0.727057	0.685598	0.725371	0.716271
33.648	0.631757	0.727057	0.685598	0.725371	0.715932
33.67	0.631757	0.726465	0.685598	0.725371	0.715593
33.691	0.631757	0.726465	0.684922	0.724696	0.715593
33.712	0.631757	0.725873	0.684922	0.724696	0.715254
33.734	0.631757	0.725281	0.684922	0.724696	0.714915
33.755	0.631757	0.725281	0.684922	0.724696	0.714915
33.777	0.631757	0.724689	0.684922	0.724696	0.714576
33.798	0.630912	0.724097	0.684922	0.724696	0.714576
33.82	0.630912	0.724097	0.684246	0.724696	0.714237
33.841	0.630912	0.723505	0.684246	0.724696	0.713898
33.863	0.630912	0.722913	0.684246	0.724022	0.713898
33.884	0.630912	0.722913	0.684246	0.724022	0.713559
33.906	0.630912	0.722321	0.68357	0.724022	0.71322
33.927	0.630068	0.721729	0.68357	0.724022	0.71322
33.948	0.630068	0.721137	0.68357	0.724022	0.712881
33.97	0.630068	0.721137	0.68357	0.723347	0.712881
33.991	0.630068	0.720545	0.682894	0.723347	0.712542
34.013	0.629223	0.719953	0.682894	0.723347	0.712203
34.034	0.629223	0.719361	0.682894	0.723347	0.712203
34.056	0.629223	0.718769	0.682894	0.723347	0.711864
34.077	0.629223	0.718769	0.682218	0.722672	0.711864
34.099	0.628378	0.718176	0.682218	0.722672	0.711525
34.12	0.628378	0.717584	0.682218	0.722672	0.711186
34.142	0.628378	0.716992	0.681542	0.722672	0.711186
34.163	0.627534	0.7164	0.681542	0.721997	0.710847
34.185	0.627534	0.715808	0.681542	0.721997	0.710847
34.206	0.627534	0.715808	0.680865	0.721997	0.710508
34.227	0.627534	0.715216	0.680865	0.721997	0.710169
34.249	0.626689	0.714624	0.680865	0.721323	0.710169
34.27	0.626689	0.714032	0.680189	0.721323	0.709831
34.292	0.626689	0.71344	0.680189	0.721323	0.709831
34.313	0.625845	0.712848	0.679513	0.720648	0.709492
34.335	0.625845	0.712256	0.679513	0.720648	0.709492
34.356	0.625	0.711664	0.679513	0.720648	0.709153
34.378	0.625	0.711072	0.678837	0.719973	0.709153
34.399	0.625	0.71048	0.678837	0.719973	0.708814
34.421	0.624155	0.709888	0.678161	0.719973	0.708475
34.442	0.624155	0.709295	0.678161	0.719298	0.708475
34.464	0.623311	0.708703	0.677485	0.719298	0.708136
34.485	0.623311	0.708703	0.677485	0.719298	0.708136
34.506	0.623311	0.708111	0.676809	0.718623	0.707797
34.528	0.622466	0.707519	0.676809	0.718623	0.707797
34.549	0.622466	0.706927	0.676809	0.718623	0.707458
34.571	0.621622	0.706335	0.676133	0.717949	0.707458
34.592	0.621622	0.705743	0.676133	0.717949	0.707119
34.614	0.620777	0.705151	0.675456	0.717274	0.707119
34.635	0.620777	0.704559	0.675456	0.717274	0.70678
34.657	0.619932	0.703967	0.67478	0.717274	0.70678
34.678	0.619932	0.703375	0.674104	0.716599	0.706441
34.7	0.619088	0.702783	0.674104	0.716599	0.706441
34.721	0.619088	0.702191	0.673428	0.715924	0.706102
34.742	0.618243	0.701599	0.673428	0.715924	0.706102
34.764	0.618243	0.701007	0.672752	0.71525	0.705763
34.785	0.617399	0.700414	0.672752	0.71525	0.705763
34.807	0.617399	0.69923	0.672076	0.714575	0.705424
34.828	0.616554	0.698638	0.672076	0.714575	0.705424
34.85	0.615709	0.698046	0.6714	0.7139	0.705085
34.871	0.615709	0.697454	0.670723	0.7139	0.705085
34.893	0.614865	0.696862	0.670723	0.713225	0.704746
34.914	0.614865	0.69627	0.670047	0.713225	0.704746
34.936	0.61402	0.695678	0.670047	0.712551	0.704407
34.957	0.613176	0.695086	0.669371	0.712551	0.704407
34.979	0.613176	0.694494	0.668695	0.711876	0.704068
35	0.612331	0.693902	0.668695	0.711876	0.704068
35.021	0.612331	0.69331	0.668019	0.711201	0.703729
35.043	0.611486	0.692718	0.667343	0.711201	0.703729
35.064	0.610642	0.692126	0.667343	0.710526	0.70339
35.086	0.610642	0.691533	0.666667	0.710526	0.70339
35.107	0.609797	0.690941	0.666667	0.709852	0.703051
35.129	0.608953	0.690349	0.665991	0.709852	0.703051
35.15	0.608108	0.689757	0.665314	0.709177	0.703051
35.172	0.608108	0.689165	0.664638	0.708502	0.702712
35.193	0.607264	0.688573	0.664638	0.708502	0.702712
35.215	0.606419	0.687389	0.663962	0.707827	0.702373
35.236	0.606419	0.686797	0.663286	0.707827	0.702373
35.258	0.605574	0.686205	0.663286	0.707152	0.702034
35.279	0.60473	0.685613	0.66261	0.706478	0.702034
35.3	0.603885	0.685021	0.661934	0.706478	0.702034
35.322	0.603885	0.684429	0.661934	0.705803	0.701695
35.343	0.603041	0.683837	0.661258	0.705128	0.701695
35.365	0.602196	0.683245	0.660581	0.705128	0.701356
35.386	0.601351	0.682652	0.659905	0.704453	0.701356
35.408	0.601351	0.68206	0.659905	0.703779	0.701017
35.429	0.600507	0.681468	0.659229	0.703779	0.701017
35.451	0.599662	0.680876	0.658553	0.703104	0.701017
35.472	0.598818	0.680284	0.657877	0.702429	0.700678
35.494	0.597973	0.6791	0.657877	0.702429	0.700678
35.515	0.597128	0.678508	0.657201	0.701754	0.700339
35.536	0.597128	0.677916	0.656525	0.70108	0.700339
35.558	0.596284	0.677324	0.655849	0.70108	0.700339
35.579	0.595439	0.676732	0.655172	0.700405	0.7
35.601	0.594595	0.67614	0.655172	0.69973	0.7
35.622	0.59375	0.675548	0.654496	0.69973	0.699661
35.644	0.592905	0.674956	0.65382	0.699055	0.699661
35.665	0.592061	0.674364	0.653144	0.698381	0.699661
35.687	0.592061	0.673771	0.652468	0.697706	0.699322
35.708	0.591216	0.673179	0.652468	0.697706	0.699322
35.73	0.590372	0.672587	0.651792	0.697031	0.698983
35.751	0.589527	0.671403	0.651116	0.696356	0.698983
35.773	0.588682	0.670811	0.650439	0.695682	0.698983
35.794	0.587838	0.670219	0.649763	0.695682	0.698644
35.815	0.586993	0.669627	0.649763	0.695007	0.698644
35.837	0.586149	0.669035	0.649087	0.694332	0.698305
35.858	0.585304	0.668443	0.648411	0.693657	0.698305
35.88	0.584459	0.667851	0.647735	0.692982	0.698305
35.901	0.583615	0.667259	0.647059	0.692982	0.697966
35.923	0.58277	0.666667	0.646383	0.692308	0.697966
35.944	0.581926	0.666075	0.645707	0.691633	0.697627
35.966	0.581081	0.665483	0.645707	0.690958	0.697627
35.987	0.580236	0.664298	0.64503	0.690283	0.697627
36.009	0.579392	0.663706	0.644354	0.690283	0.697288
36.03	0.578547	0.663114	0.643678	0.689609	0.697288
36.052	0.577703	0.662522	0.643002	0.688934	0.696949
36.073	0.576858	0.66193	0.642326	0.688259	0.696949
36.094	0.576014	0.661338	0.64165	0.687584	0.69661
36.116	0.575169	0.660746	0.640974	0.68691	0.69661
36.137	0.574324	0.660154	0.640297	0.686235	0.69661
36.159	0.57348	0.659562	0.640297	0.686235	0.696271
36.18	0.572635	0.65897	0.639621	0.68556	0.696271
36.202	0.571791	0.658378	0.638945	0.684885	0.695932
36.223	0.570946	0.657786	0.638269	0.684211	0.695932
36.245	0.570101	0.656602	0.637593	0.683536	0.695593
36.266	0.569257	0.656009	0.636917	0.682861	0.695593
36.288	0.568412	0.655417	0.636241	0.682186	0.695254
36.309	0.567568	0.654825	0.635565	0.681511	0.695254
36.33	0.566723	0.654233	0.634888	0.680837	0.694915
36.352	0.565878	0.653641	0.634212	0.680162	0.694915
36.373	0.565034	0.653049	0.633536	0.680162	0.694576
36.395	0.563345	0.652457	0.63286	0.679487	0.694576
36.416	0.5625	0.651865	0.632184	0.678812	0.694237
36.438	0.561655	0.651273	0.631508	0.678138	0.694237
36.459	0.560811	0.650681	0.630832	0.677463	0.693898
36.481	0.559966	0.650089	0.630156	0.676788	0.693898
36.502	0.559122	0.648905	0.629479	0.676113	0.693559
36.524	0.558277	0.648313	0.628803	0.675439	0.693559
36.545	0.557432	0.647721	0.628127	0.674764	0.69322
36.567	0.555743	0.647128	0.627451	0.674089	0.69322
36.588	0.554899	0.646536	0.626775	0.673414	0.692881
36.609	0.554054	0.645944	0.626099	0.67274	0.692542
36.631	0.553209	0.645352	0.625423	0.672065	0.692542
36.652	0.552365	0.64476	0.624746	0.67139	0.692203
36.674	0.550676	0.644168	0.62407	0.670715	0.692203
36.695	0.549831	0.643576	0.623394	0.67004	0.691864
36.717	0.548986	0.642984	0.622718	0.669366	0.691525
36.738	0.548142	0.642392	0.622042	0.668691	0.691525
36.76	0.547297	0.6418	0.621366	0.668016	0.691186
36.781	0.545608	0.640616	0.62069	0.667341	0.690847
36.803	0.544764	0.640024	0.620014	0.666667	0.690847
36.824	0.543919	0.639432	0.619337	0.665317	0.690508
36.845	0.543074	0.63884	0.618661	0.664642	0.690169
36.867	0.541385	0.638247	0.617985	0.663968	0.690169
36.888	0.540541	0.637655	0.617309	0.663293	0.689831
36.91	0.539696	0.637063	0.616633	0.662618	0.689492
36.931	0.538851	0.636471	0.615957	0.661943	0.689492
36.953	0.537162	0.635879	0.615281	0.661269	0.689153
36.974	0.536318	0.635287	0.614604	0.660594	0.688814
36.996	0.535473	0.634695	0.613928	0.659919	0.688814
37.017	0.534628	0.634103	0.613252	0.659244	0.688475
37.039	0.532939	0.633511	0.612576	0.657895	0.688136
37.06	0.532095	0.632919	0.6119	0.65722	0.687797
37.082	0.53125	0.632327	0.611224	0.656545	0.687797
37.103	0.529561	0.631143	0.609872	0.65587	0.687458
37.124	0.528716	0.630551	0.609195	0.655196	0.687119
37.146	0.527872	0.629959	0.608519	0.654521	0.68678
37.167	0.526182	0.629366	0.607843	0.653171	0.68678
37.189	0.525338	0.628774	0.607167	0.652497	0.686441
37.21	0.524493	0.628182	0.606491	0.651822	0.686102
37.232	0.522804	0.62759	0.605815	0.651147	0.685763
37.253	0.521959	0.626998	0.605139	0.649798	0.685763
37.275	0.521115	0.626406	0.604462	0.649123	0.685424
37.296	0.519426	0.625814	0.60311	0.648448	0.685085
37.318	0.518581	0.625222	0.602434	0.647773	0.684746
37.339	0.517736	0.62463	0.601758	0.647099	0.684407
37.361	0.516047	0.624038	0.601082	0.645749	0.684068
37.382	0.515203	0.623446	0.600406	0.645074	0.684068
37.403	0.514358	0.622262	0.59973	0.644399	0.683729
37.425	0.512669	0.62167	0.599053	0.64305	0.68339
37.446	0.511824	0.621078	0.597701	0.642375	0.683051
37.468	0.510135	0.620485	0.597025	0.6417	0.682712
37.489	0.509291	0.619893	0.596349	0.641026	0.682373
37.511	0.508446	0.619301	0.595673	0.639676	0.682034
37.532	0.506757	0.618709	0.594997	0.639001	0.681695
37.554	0.505912	0.618117	0.59432	0.638327	0.681356
37.575	0.504223	0.617525	0.592968	0.636977	0.681356
37.597	0.503378	0.616933	0.592292	0.636302	0.681017
37.618	0.502534	0.616341	0.591616	0.635628	0.680678
37.639	0.500845	0.615749	0.59094	0.634278	0.680339
37.661	0.5	0.614565	0.590264	0.633603	0.68
37.682	0.498311	0.613973	0.588911	0.632928	0.679661
37.704	0.497466	0.613381	0.588235	0.631579	0.679322
37.725	0.495777	0.612789	0.587559	0.630904	0.678983
37.747	0.494932	0.612197	0.586883	0.629555	0.678644
37.768	0.494088	0.611604	0.585531	0.62888	0.678305
37.79	0.492399	0.611012	0.584855	0.628205	0.677966
37.811	0.491554	0.61042	0.584178	0.626856	0.677627
37.833	0.489865	0.609236	0.583502	0.626181	0.677288
37.854	0.48902	0.608644	0.58215	0.624831	0.676949
37.876	0.487331	0.608052	0.581474	0.624157	0.676271
37.897	0.486486	0.60746	0.580798	0.622807	0.675932
37.918	0.484797	0.606868	0.580122	0.622132	0.675593
37.94	0.483953	0.606276	0.578769	0.620783	0.675254
37.961	0.482264	0.605684	0.578093	0.620108	0.674915
37.983	0.481419	0.6045	0.577417	0.619433	0.674576
38.004	0.47973	0.603908	0.576065	0.618084	0.674237
38.026	0.478885	0.603316	0.575389	0.617409	0.673559
38.047	0.477196	0.602724	0.574713	0.616059	0.67322
38.069	0.476351	0.602131	0.57336	0.615385	0.672881
38.09	0.474662	0.601539	0.572684	0.614035	0.672542
38.112	0.473818	0.600355	0.572008	0.61336	0.672203
38.133	0.472128	0.599763	0.570656	0.612011	0.671525
38.155	0.471284	0.599171	0.56998	0.610661	0.671186
38.176	0.469595	0.598579	0.568627	0.609987	0.670847
38.197	0.46875	0.597987	0.567951	0.608637	0.670169
38.219	0.467061	0.596803	0.567275	0.607962	0.669831
38.24	0.466216	0.596211	0.565923	0.606613	0.669492
38.262	0.464527	0.595619	0.565247	0.605938	0.668814
38.283	0.463682	0.595027	0.563895	0.604588	0.668475
38.305	0.461993	0.593843	0.563218	0.603239	0.667797
38.326	0.461149	0.59325	0.562542	0.602564	0.667458
38.348	0.459459	0.592658	0.56119	0.601215	0.66678
38.369	0.45777	0.592066	0.560514	0.60054	0.666441
38.391	0.456926	0.590882	0.559162	0.59919	0.665763
38.412	0.455236	0.59029	0.558485	0.597841	0.665424
38.433	0.454392	0.589698	0.557133	0.597166	0.664746
38.455	0.452703	0.588514	0.556457	0.595816	0.664407
38.476	0.451858	0.587922	0.555105	0.595142	0.663729
38.498	0.450169	0.58733	0.554429	0.593792	0.66339
38.519	0.44848	0.586738	0.553076	0.592443	0.662712
38.541	0.447635	0.585554	0.5524	0.591768	0.662034
38.562	0.445946	0.584962	0.551048	0.590418	0.661695
38.584	0.445101	0.584369	0.550372	0.589069	0.661017
38.605	0.443412	0.583185	0.54902	0.588394	0.660339
38.627	0.441723	0.582593	0.547667	0.587045	0.659661
38.648	0.440878	0.582001	0.546991	0.585695	0.659322
38.67	0.439189	0.580817	0.545639	0.584345	0.658644
38.691	0.4375	0.580225	0.544963	0.583671	0.657966
38.712	0.436655	0.579041	0.543611	0.582321	0.657288
38.734	0.434966	0.578449	0.542258	0.580972	0.65661
38.755	0.433277	0.577857	0.541582	0.580297	0.655932
38.777	0.432432	0.576673	0.54023	0.578947	0.655593
38.798	0.430743	0.576081	0.538878	0.577598	0.654915
38.82	0.429899	0.574896	0.538201	0.576248	0.654237
38.841	0.428209	0.574304	0.536849	0.575574	0.653559
38.863	0.42652	0.573712	0.535497	0.574224	0.652881
38.884	0.425676	0.572528	0.534821	0.572874	0.652203
38.906	0.423986	0.571936	0.533469	0.571525	0.651525
38.927	0.422297	0.570752	0.532116	0.570175	0.650508
38.948	0.421453	0.57016	0.530764	0.569501	0.649831
38.97	0.419764	0.568976	0.530088	0.568151	0.649153
38.991	0.418074	0.568384	0.528736	0.566802	0.648475
39.013	0.416385	0.5672	0.527383	0.565452	0.647797
39.034	0.415541	0.566607	0.526031	0.564103	0.647119
39.056	0.413851	0.565423	0.525355	0.562753	0.646102
39.077	0.412162	0.564831	0.524003	0.562078	0.645424
39.099	0.411318	0.563647	0.52265	0.560729	0.644746
39.12	0.409628	0.563055	0.521298	0.559379	0.644068
39.142	0.407939	0.561871	0.519946	0.55803	0.643051
39.163	0.40625	0.561279	0.51927	0.55668	0.642373
39.185	0.405405	0.560095	0.517918	0.555331	0.641356
39.206	0.403716	0.559503	0.516565	0.553981	0.640678
39.227	0.402027	0.558319	0.515213	0.553306	0.64
39.249	0.400338	0.557134	0.513861	0.551957	0.638983
39.27	0.399493	0.556542	0.512508	0.550607	0.638305
39.292	0.397804	0.555358	0.511156	0.549258	0.637288
39.313	0.396115	0.554766	0.509804	0.547908	0.63661
39.335	0.394426	0.553582	0.508452	0.546559	0.635593
39.356	0.393581	0.552398	0.507776	0.545209	0.634576
39.378	0.391892	0.551806	0.506423	0.54386	0.633898
39.399	0.390203	0.550622	0.505071	0.54251	0.632881
39.421	0.388514	0.549438	0.503719	0.541161	0.632203
39.442	0.387669	0.548845	0.502366	0.539811	0.631186
39.464	0.38598	0.547661	0.501014	0.538462	0.630169
39.485	0.384291	0.546477	0.499662	0.537112	0.629153
39.506	0.382601	0.545885	0.49831	0.535762	0.628475
39.528	0.380912	0.544701	0.496957	0.534413	0.627458
39.549	0.380068	0.543517	0.495605	0.533063	0.626441
39.571	0.378378	0.542925	0.494253	0.531714	0.625424
39.592	0.376689	0.541741	0.492901	0.530364	0.624407
39.614	0.375	0.540557	0.491548	0.529015	0.62339
39.635	0.373311	0.539964	0.48952	0.527665	0.622373
39.657	0.372466	0.53878	0.488168	0.526316	0.621695
39.678	0.370777	0.537596	0.486815	0.524966	0.620678
39.7	0.369088	0.536412	0.485463	0.523617	0.619661
39.721	0.367399	0.53582	0.484111	0.522267	0.618644
39.742	0.365709	0.534636	0.482759	0.520918	0.617627
39.764	0.36402	0.533452	0.481406	0.519568	0.616271
39.785	0.363176	0.532268	0.480054	0.518219	0.615254
39.807	0.361486	0.531676	0.478702	0.516869	0.614237
39.828	0.359797	0.530491	0.476673	0.51552	0.61322
39.85	0.358108	0.529307	0.475321	0.51417	0.612203
39.871	0.356419	0.528123	0.473969	0.512821	0.611186
39.893	0.35473	0.526939	0.472617	0.511471	0.609831
39.914	0.353885	0.526347	0.471264	0.509447	0.608814
39.936	0.352196	0.525163	0.469912	0.508097	0.607797
39.957	0.350507	0.523979	0.467884	0.506748	0.60678
39.979	0.348818	0.522795	0.466531	0.505398	0.605424
40	0.347128	0.52161	0.465179	0.504049	0.604407
40.021	0.345439	0.520426	0.463827	0.502699	0.60339
40.043	0.34375	0.519834	0.461799	0.50135	0.602034
40.064	0.342905	0.51865	0.460446	0.5	0.601017
40.086	0.341216	0.517466	0.459094	0.497976	0.599661
40.107	0.339527	0.516282	0.457742	0.496626	0.598644
40.129	0.337838	0.515098	0.455713	0.495277	0.597288
40.15	0.336149	0.513914	0.454361	0.493927	0.596271
40.172	0.334459	0.512729	0.453009	0.492578	0.594915
40.193	0.33277	0.511545	0.45098	0.490553	0.593898
40.215	0.331081	0.510361	0.449628	0.489204	0.592542
40.236	0.329392	0.509177	0.448276	0.487854	0.591525
40.258	0.328547	0.507993	0.446247	0.486505	0.590169
40.279	0.326858	0.506809	0.444895	0.485155	0.588814
40.3	0.325169	0.506217	0.443543	0.483131	0.587797
40.322	0.32348	0.505033	0.441515	0.481781	0.586441
40.343	0.321791	0.503848	0.440162	0.480432	0.585085
40.365	0.320101	0.502664	0.438134	0.479082	0.584068
40.386	0.318412	0.50148	0.436782	0.477733	0.582712
40.408	0.316723	0.500296	0.435429	0.475709	0.581356
40.429	0.315034	0.499112	0.433401	0.474359	0.58
40.451	0.313345	0.497928	0.432049	0.473009	0.578644
40.472	0.3125	0.496744	0.43002	0.47166	0.577288
40.494	0.310811	0.49556	0.428668	0.469636	0.576271
40.515	0.309122	0.493783	0.42664	0.468286	0.574915
40.536	0.307432	0.492599	0.425287	0.466937	0.573559
40.558	0.305743	0.491415	0.423259	0.465587	0.572203
40.579	0.304054	0.490231	0.421907	0.463563	0.570847
40.601	0.302365	0.489047	0.419878	0.462213	0.569492
40.622	0.300676	0.487863	0.418526	0.460864	0.568136
40.644	0.298986	0.486679	0.416498	0.458839	0.56678
40.665	0.297297	0.485494	0.415145	0.45749	0.565424
40.687	0.295608	0.48431	0.413117	0.45614	0.564068
40.708	0.293919	0.483126	0.411765	0.454116	0.562373
40.73	0.293074	0.481942	0.409736	0.452767	0.561017
40.751	0.291385	0.480758	0.408384	0.451417	0.559661
40.773	0.289696	0.478982	0.406356	0.450067	0.558305
40.794	0.288007	0.477798	0.405003	0.448043	0.556949
40.815	0.286318	0.476613	0.402975	0.446694	0.555593
40.837	0.284628	0.475429	0.400947	0.445344	0.553898
40.858	0.282939	0.474245	0.399594	0.44332	0.552542
40.88	0.28125	0.473061	0.397566	0.44197	0.551186
40.901	0.279561	0.471285	0.396214	0.440621	0.549492
40.923	0.277872	0.470101	0.394185	0.438596	0.548136
40.944	0.276182	0.468917	0.392157	0.437247	0.54678
40.966	0.274493	0.467732	0.390805	0.435223	0.545085
40.987	0.272804	0.466548	0.388776	0.433873	0.543729
41.009	0.271115	0.464772	0.386748	0.432524	0.542373
41.03	0.269426	0.463588	0.385396	0.430499	0.540678
41.052	0.267736	0.462404	0.383367	0.42915	0.539322
41.073	0.266047	0.46122	0.381339	0.4278	0.537627
41.094	0.264358	0.460036	0.379986	0.425776	0.536271
41.116	0.262669	0.458259	0.377958	0.424426	0.534576
41.137	0.26098	0.457075	0.37593	0.423077	0.53322
41.159	0.260135	0.455891	0.374577	0.421053	0.531525
41.18	0.258446	0.454115	0.372549	0.419703	0.530169
41.202	0.256757	0.452931	0.370521	0.417679	0.528475
41.223	0.255068	0.451747	0.368492	0.416329	0.52678
41.245	0.253378	0.450562	0.36714	0.41498	0.525424
41.266	0.251689	0.448786	0.365112	0.412955	0.523729
41.288	0.25	0.447602	0.363083	0.411606	0.522034
41.309	0.248311	0.446418	0.361731	0.409582	0.520678
41.33	0.246622	0.444642	0.359703	0.408232	0.518983
41.352	0.244932	0.443458	0.357674	0.406883	0.517288
41.373	0.243243	0.442274	0.355646	0.404858	0.515932
41.395	0.241554	0.440497	0.353617	0.403509	0.514237
41.416	0.239865	0.439313	0.352265	0.401484	0.512542
41.438	0.238176	0.438129	0.350237	0.400135	0.510847
41.459	0.236486	0.436353	0.348208	0.398785	0.509153
41.481	0.234797	0.435169	0.34618	0.396761	0.507797
41.502	0.233108	0.433393	0.344828	0.395412	0.506102
41.524	0.231419	0.432208	0.342799	0.393387	0.504407
41.545	0.22973	0.431024	0.340771	0.392038	0.502712
41.567	0.228041	0.429248	0.338742	0.390688	0.501017
41.588	0.226351	0.428064	0.336714	0.388664	0.499322
41.609	0.224662	0.426288	0.334686	0.387314	0.497627
41.631	0.222973	0.425104	0.333333	0.38529	0.495932
41.652	0.221284	0.423327	0.331305	0.383941	0.494237
41.674	0.219595	0.422143	0.329277	0.381916	0.492542
41.695	0.217905	0.420367	0.327248	0.380567	0.490847
41.717	0.217061	0.419183	0.32522	0.378543	0.489153
41.738	0.215372	0.417407	0.323867	0.377193	0.487458
41.76	0.213682	0.416223	0.321839	0.375843	0.485763
41.781	0.211993	0.414446	0.319811	0.373819	0.484068
41.803	0.210304	0.413262	0.317782	0.37247	0.482373
41.824	0.208615	0.411486	0.315754	0.370445	0.480678
41.845	0.206926	0.410302	0.313725	0.369096	0.478983
41.867	0.205236	0.408526	0.312373	0.367072	0.477288
41.888	0.203547	0.407342	0.310345	0.365722	0.475254
41.91	0.201858	0.405565	0.308316	0.363698	0.473559
41.931	0.200169	0.404381	0.306288	0.362348	0.471864
41.953	0.19848	0.402605	0.30426	0.360999	0.470169
41.974	0.196791	0.401421	0.302231	0.358974	0.468475
41.996	0.195101	0.399645	0.300203	0.357625	0.466441
42.017	0.193412	0.397869	0.298851	0.355601	0.464746
42.039	0.191723	0.396684	0.296822	0.354251	0.463051
42.06	0.190034	0.394908	0.294794	0.352227	0.461356
42.082	0.188345	0.393724	0.292765	0.350877	0.459322
42.103	0.186655	0.391948	0.290737	0.348853	0.457627
42.124	0.185811	0.390172	0.288709	0.347503	0.455932
42.146	0.184122	0.388988	0.287356	0.345479	0.454237
42.167	0.182432	0.387211	0.285328	0.34413	0.452203
42.189	0.180743	0.385435	0.2833	0.34278	0.450508
42.21	0.179054	0.384251	0.281271	0.340756	0.448814
42.232	0.177365	0.382475	0.279243	0.339406	0.44678
42.253	0.175676	0.380699	0.277214	0.337382	0.445085
42.275	0.173986	0.379515	0.275862	0.336032	0.44339
42.296	0.172297	0.377738	0.273834	0.334008	0.441356
42.318	0.170608	0.375962	0.271805	0.332659	0.439661
42.339	0.168919	0.374778	0.269777	0.330634	0.437966
42.361	0.16723	0.373002	0.267748	0.329285	0.435932
42.382	0.166385	0.371226	0.26572	0.32726	0.434237
42.403	0.164696	0.370041	0.264368	0.325911	0.432542
42.425	0.163007	0.368265	0.262339	0.324561	0.430508
42.446	0.161318	0.366489	0.260311	0.322537	0.428814
42.468	0.159628	0.364713	0.258283	0.321188	0.42678
42.489	0.157939	0.363529	0.256254	0.319163	0.425085
42.511	0.15625	0.361753	0.254902	0.317814	0.42339
42.532	0.154561	0.359976	0.252874	0.315789	0.421356
42.554	0.153716	0.3582	0.250845	0.31444	0.419661
42.575	0.152027	0.357016	0.248817	0.312416	0.417627
42.597	0.150338	0.35524	0.246788	0.311066	0.415932
42.618	0.148649	0.353464	0.245436	0.309042	0.413898
42.639	0.146959	0.351687	0.243408	0.307692	0.412203
42.661	0.14527	0.349911	0.241379	0.306343	0.410508
42.682	0.143581	0.348727	0.239351	0.304318	0.408475
42.704	0.142736	0.346951	0.237999	0.302969	0.40678
42.725	0.141047	0.345175	0.23597	0.300945	0.404746
42.747	0.139358	0.343398	0.233942	0.299595	0.403051
42.768	0.137669	0.341622	0.231913	0.297571	0.401017
42.79	0.13598	0.340438	0.230561	0.296221	0.399322
42.811	0.135135	0.338662	0.228533	0.294197	0.397627
42.833	0.133446	0.336886	0.226504	0.292848	0.395593
42.854	0.131757	0.33511	0.224476	0.291498	0.393898
42.876	0.130068	0.333333	0.223124	0.289474	0.391864
42.897	0.128378	0.331557	0.221095	0.288124	0.390169
42.918	0.127534	0.329781	0.219067	0.2861	0.388136
42.94	0.125845	0.328597	0.217039	0.28475	0.386441
42.961	0.124155	0.326821	0.215686	0.282726	0.384407
42.983	0.122466	0.325044	0.213658	0.281377	0.382712
43.004	0.121622	0.323268	0.211629	0.280027	0.381017
43.026	0.119932	0.321492	0.210277	0.278003	0.378983
43.047	0.118243	0.319716	0.208249	0.276653	0.377288
43.069	0.116554	0.31794	0.20622	0.274629	0.375254
43.09	0.115709	0.316163	0.204868	0.273279	0.373559
43.112	0.11402	0.314387	0.20284	0.271255	0.371525
43.133	0.112331	0.312611	0.200811	0.269906	0.369831
43.155	0.111486	0.311427	0.199459	0.268556	0.368136
43.176	0.109797	0.309651	0.197431	0.266532	0.366102
43.197	0.108108	0.307874	0.195402	0.265182	0.364407
43.219	0.106419	0.306098	0.19405	0.263158	0.362373
43.24	0.105574	0.304322	0.192022	0.261808	0.360678
43.262	0.103885	0.302546	0.189993	0.260459	0.358983
43.283	0.102196	0.30077	0.188641	0.258435	0.356949
43.305	0.101351	0.298993	0.186613	0.257085	0.355254
43.326	0.0996622	0.297217	0.184584	0.255061	0.35322
43.348	0.097973	0.295441	0.183232	0.253711	0.351525
43.369	0.0971284	0.293665	0.181204	0.252362	0.349831
43.391	0.0954392	0.291889	0.179851	0.250337	0.347797
43.412	0.0945946	0.290112	0.177823	0.248988	0.346102
43.433	0.0929054	0.288336	0.175794	0.246964	0.344068
43.455	0.0912162	0.28656	0.174442	0.245614	0.342373
43.476	0.0903716	0.284784	0.172414	0.244265	0.340678
43.498	0.0886824	0.283008	0.171062	0.24224	0.338644
43.519	0.0878378	0.281231	0.169033	0.240891	0.336949
43.541	0.0861486	0.279455	0.167681	0.239541	0.335254
43.562	0.0844595	0.277679	0.165652	0.237517	0.33322
43.584	0.0836149	0.275903	0.1643	0.236167	0.331525
43.605	0.0819257	0.274127	0.162272	0.234143	0.329831
43.627	0.0810811	0.272351	0.16092	0.232794	0.327797
43.648	0.0793919	0.270574	0.158891	0.231444	0.326102
43.67	0.0785473	0.268798	0.157539	0.22942	0.324407
43.691	0.0768581	0.267022	0.15551	0.22807	0.322373
43.712	0.0760135	0.265246	0.154158	0.226721	0.320678
43.734	0.0743243	0.26347	0.15213	0.224696	0.318983
43.755	0.0734797	0.261693	0.150778	0.223347	0.316949
43.777	0.0717905	0.259917	0.148749	0.221997	0.315254
43.798	0.0709459	0.258141	0.147397	0.219973	0.313559
43.82	0.0692568	0.255773	0.145368	0.218623	0.311864
43.841	0.0684122	0.253996	0.144016	0.217274	0.309831
43.863	0.066723	0.25222	0.141988	0.21525	0.308136
43.884	0.0658784	0.250444	0.140636	0.2139	0.306441
43.906	0.0650338	0.248668	0.139283	0.212551	0.304746
43.927	0.0633446	0.246892	0.137255	0.210526	0.303051
43.948	0.0625	0.245115	0.135903	0.209177	0.301356
43.97	0.0608108	0.243339	0.133874	0.207827	0.299322
43.991	0.0599662	0.241563	0.132522	0.206478	0.297627
44.013	0.0591216	0.239787	0.13117	0.204453	0.295932
44.034	0.0574324	0.238011	0.129141	0.203104	0.294237
44.056	0.0565878	0.236234	0.127789	0.201754	0.292542
44.077	0.0557432	0.234458	0.126437	0.19973	0.290847
44.099	0.0540541	0.232682	0.124408	0.198381	0.289153
44.12	0.0532095	0.230314	0.123056	0.197031	0.287458
44.142	0.0523649	0.228538	0.121704	0.195682	0.285763
44.163	0.0506757	0.226761	0.119675	0.193657	0.284068
44.185	0.0498311	0.224985	0.118323	0.192308	0.282373
44.206	0.0489865	0.223209	0.116971	0.190958	0.280678
44.227	0.0481419	0.221433	0.115619	0.189609	0.278983
44.249	0.0464527	0.219657	0.11359	0.187584	0.277288
44.27	0.0456081	0.21788	0.112238	0.186235	0.275593
44.292	0.0447635	0.216104	0.110886	0.184885	0.273898
44.313	0.0439189	0.214328	0.109533	0.183536	0.272203
44.335	0.0422297	0.212552	0.107505	0.181511	0.270508
44.356	0.0413851	0.210776	0.106153	0.180162	0.268814
44.378	0.0405405	0.208999	0.104801	0.178812	0.267119
44.399	0.0396959	0.207223	0.103448	0.177463	0.265424
44.421	0.0388514	0.204855	0.102096	0.176113	0.264068
44.442	0.0380068	0.203079	0.100744	0.174089	0.262373
44.464	0.0363176	0.201303	0.0987153	0.17274	0.260678
44.485	0.035473	0.199526	0.0973631	0.17139	0.258983
44.506	0.0346284	0.19775	0.0960108	0.17004	0.257288
44.528	0.0337838	0.195974	0.0946586	0.168691	0.255932
44.549	0.0329392	0.194198	0.0933063	0.167341	0.254237
44.571	0.0320946	0.192422	0.091954	0.165317	0.252542
44.592	0.03125	0.190645	0.0906018	0.163968	0.251186
44.614	0.0304054	0.188869	0.0892495	0.162618	0.249492
44.635	0.0295608	0.187093	0.0878972	0.161269	0.247797
44.657	0.0287162	0.185317	0.086545	0.159919	0.246441
44.678	0.0278716	0.183541	0.0851927	0.15857	0.244746
44.7	0.027027	0.181764	0.0838404	0.15722	0.243051
44.721	0.0261824	0.179988	0.0824882	0.15587	0.241695
44.742	0.0253378	0.178212	0.0811359	0.153846	0.24
44.764	0.0244932	0.176436	0.0797836	0.152497	0.238644
44.785	0.0236486	0.17466	0.0784314	0.151147	0.236949
44.807	0.0228041	0.172883	0.0770791	0.149798	0.235593
44.828	0.0219595	0.171107	0.0757268	0.148448	0.233898
44.85	0.0211149	0.169331	0.0743746	0.147099	0.232542
44.871	0.0211149	0.167555	0.0730223	0.145749	0.230847
44.893	0.0202703	0.165779	0.07167	0.144399	0.229492
44.914	0.0194257	0.164002	0.0709939	0.14305	0.228136
44.936	0.0185811	0.162226	0.0696416	0.1417	0.226441
44.957	0.0177365	0.16045	0.0682894	0.140351	0.225085
44.979	0.0168919	0.158674	0.0669371	0.139001	0.22339
45	0.0168919	0.156898	0.0655849	0.137652	0.222034
45.021	0.0160473	0.155121	0.0642326	0.136302	0.220678
45.043	0.0152027	0.153345	0.0635565	0.134953	0.219322
45.064	0.0143581	0.151569	0.0622042	0.133603	0.217627
45.086	0.0143581	0.149793	0.0608519	0.132254	0.216271
45.107	0.0135135	0.148017	0.0594997	0.130904	0.214915
45.129	0.0126689	0.14624	0.0588235	0.129555	0.213559
45.15	0.0126689	0.144464	0.0574713	0.128205	0.211864
45.172	0.0118243	0.14328	0.056119	0.126856	0.210508
45.193	0.0109797	0.141504	0.0554429	0.125506	0.209153
45.215	0.0109797	0.139728	0.0540906	0.124157	0.207797
45.236	0.0101351	0.137951	0.0527383	0.122807	0.206441
45.258	0.00929054	0.136175	0.0520622	0.121457	0.205085
45.279	0.00929054	0.134399	0.0507099	0.120108	0.203729
45.3	0.00844595	0.132623	0.0500338	0.118758	0.202373
45.322	0.00844595	0.131439	0.0486815	0.117409	0.201017
45.343	0.00760135	0.129663	0.0480054	0.116734	0.199661
45.365	0.00760135	0.127886	0.0466531	0.115385	0.198305
45.386	0.00675676	0.12611	0.0453009	0.114035	0.196949
45.408	0.00675676	0.124334	0.0446247	0.112686	0.195593
45.429	0.00591216	0.12315	0.0439486	0.111336	0.194237
45.451	0.00591216	0.121374	0.0425963	0.109987	0.192881
45.472	0.00506757	0.119597	0.0419202	0.108637	0.191525
45.494	0.00506757	0.117821	0.040568	0.107962	0.190169
45.515	0.00422297	0.116637	0.0398918	0.106613	0.188814
45.536	0.00422297	0.114861	0.0385396	0.105263	0.187458
45.558	0.00422297	0.113085	0.0378634	0.103914	0.186102
45.579	0.00337838	0.111308	0.0371873	0.102564	0.185085
45.601	0.00337838	0.110124	0.035835	0.101215	0.183729
45.622	0.00253378	0.108348	0.0351589	0.10054	0.182373
45.644	0.00253378	0.106572	0.0344828	0.0991903	0.181017
45.665	0.00253378	0.105388	0.0331305	0.0978408	0.179661
45.687	0.00253378	0.103612	0.0324544	0.0964912	0.178644
45.708	0.00168919	0.102427	0.0317782	0.0958165	0.177288
45.73	0.00168919	0.100651	0.030426	0.0944669	0.175932
45.751	0.00168919	0.0988751	0.0297498	0.0931174	0.174915
45.773	0.00168919	0.0976909	0.0290737	0.0917679	0.173559
45.794	0.000844595	0.0959147	0.0283976	0.0910931	0.172203
45.815	0.000844595	0.0947306	0.0277214	0.0897436	0.170847
45.837	0.000844595	0.0929544	0.0263692	0.0883941	0.169831
45.858	0.000844595	0.0917703	0.025693	0.0870445	0.168475
45.88	0.000844595	0.0899941	0.0250169	0.0863698	0.167458
45.901	0	0.0888099	0.0243408	0.0850202	0.166102
45.923	0	0.0870337	0.0236646	0.0836707	0.164746
45.944	0	0.0858496	0.0229885	0.082996	0.163729
45.966	0	0.0846655	0.0223124	0.0816464	0.162373
45.987	0	0.0828893	0.0216362	0.0802969	0.161356
46.009	0	0.0817052	0.0209601	0.0796221	0.16
46.03	0	0.080521	0.020284	0.0782726	0.158983
46.052	0	0.0787448	0.0196078	0.0775978	0.157627
46.073	0	0.0775607	0.0189317	0.0762483	0.15661
46.094	0	0.0763766	0.0182556	0.0748988	0.155254
46.116	0	0.0746004	0.0175794	0.074224	0.154237
46.137	0	0.0734162	0.0169033	0.0728745	0.152881
46.159	0	0.0722321	0.0162272	0.0721997	0.151864
46.18	0	0.0704559	0.015551	0.0708502	0.150508
46.202	0	0.0692718	0.0148749	0.0701754	0.149492
46.223	0	0.0680876	0.0141988	0.0688259	0.148136
46.245	0.000844595	0.0669035	0.0135227	0.0674764	0.147119
46.266	0.000844595	0.0657194	0.0135227	0.0668016	0.146102
46.288	0.000844595	0.0645352	0.0128465	0.0654521	0.144746
46.309	0.000844595	0.062759	0.0121704	0.0647773	0.143729
46.33	0.000844595	0.0615749	0.0114943	0.0634278	0.142373
46.352	0.000844595	0.0603908	0.0114943	0.062753	0.141356
46.373	0.00168919	0.0592066	0.0108181	0.0614035	0.140339
46.395	0.00168919	0.0580225	0.010142	0.0607287	0.138983
46.416	0.00168919	0.0568384	0.00946586	0.0593792	0.137966
46.438	0.00168919	0.0556542	0.00946586	0.0587045	0.136949
46.459	0.00253378	0.0544701	0.00878972	0.0580297	0.135932
46.481	0.00253378	0.053286	0.00811359	0.0566802	0.134576
46.502	0.00253378	0.0521018	0.00811359	0.0560054	0.133559
46.524	0.00337838	0.0509177	0.00743746	0.0546559	0.132542
46.545	0.00337838	0.0497336	0.00676133	0.0539811	0.131186
46.567	0.00337838	0.0485494	0.00676133	0.0526316	0.130169
46.588	0.00422297	0.0473653	0.00608519	0.0519568	0.129153
46.609	0.00422297	0.0467732	0.00608519	0.0512821	0.128136
46.631	0.00506757	0.0455891	0.00540906	0.0499325	0.127119
46.652	0.00506757	0.044405	0.00540906	0.0492578	0.125763
46.674	0.00506757	0.0432208	0.00473293	0.048583	0.124746
46.695	0.00591216	0.0420367	0.00473293	0.0472335	0.123729
46.717	0.00591216	0.0414446	0.0040568	0.0465587	0.122712
46.738	0.00675676	0.0402605	0.0040568	0.0458839	0.121695
46.76	0.00675676	0.0390764	0.00338066	0.0445344	0.120339
46.781	0.00760135	0.0378922	0.00338066	0.0438596	0.119322
46.803	0.00760135	0.0373002	0.00338066	0.0431849	0.118305
46.824	0.00844595	0.036116	0.00270453	0.0418354	0.117288
46.845	0.00929054	0.0349319	0.00270453	0.0411606	0.116271
46.867	0.00929054	0.0343398	0.00270453	0.0404858	0.115254
46.888	0.0101351	0.0331557	0.0020284	0.0398111	0.114237
46.91	0.0101351	0.0325636	0.0020284	0.0384615	0.11322
46.931	0.0109797	0.0313795	0.0020284	0.0377868	0.111864
46.953	0.0118243	0.0307874	0.00135227	0.037112	0.110847
46.974	0.0118243	0.0296033	0.00135227	0.0364372	0.109831
46.996	0.0126689	0.0284192	0.00135227	0.0357625	0.108814
47.017	0.0135135	0.0278271	0.00135227	0.0350877	0.107797
47.039	0.0143581	0.0272351	0.000676133	0.0337382	0.10678
47.06	0.0143581	0.0260509	0.000676133	0.0330634	0.105763
47.082	0.0152027	0.0254589	0.000676133	0.0323887	0.104746
47.103	0.0160473	0.0242747	0.000676133	0.0317139	0.103729
47.124	0.0168919	0.0236827	0.000676133	0.0310391	0.102712
47.146	0.0168919	0.0230906	0.000676133	0.0303644	0.101695
47.167	0.0177365	0.0219065	0.000676133	0.0296896	0.100678
47.189	0.0185811	0.0213144	0	0.0290148	0.099661
47.21	0.0194257	0.0207223	0	0.0283401	0.0986441
47.232	0.0202703	0.0195382	0	0.0276653	0.0976271
47.253	0.0211149	0.0189461	0	0.0263158	0.0966102
47.275	0.0219595	0.0183541	0	0.025641	0.0955932
47.296	0.0228041	0.017762	0	0.0249663	0.0945763
47.318	0.0228041	0.0171699	0	0.0242915	0.0938983
47.339	0.0236486	0.0159858	0	0.0236167	0.0928814
47.361	0.0244932	0.0153937	0	0.0236167	0.0918644
47.382	0.0253378	0.0148017	0.000676133	0.022942	0.0908475
47.403	0.0261824	0.0142096	0.000676133	0.0222672	0.0898305
47.425	0.027027	0.0136175	0.000676133	0.0215924	0.0888136
47.446	0.0278716	0.0130255	0.000676133	0.0209177	0.0877966
47.468	0.0295608	0.0124334	0.000676133	0.0202429	0.0871186
47.489	0.0304054	0.0118413	0.000676133	0.0195682	0.0861017
47.511	0.03125	0.0112493	0.000676133	0.0188934	0.0850847
47.532	0.0320946	0.0106572	0.00135227	0.0182186	0.0840678
47.554	0.0329392	0.0100651	0.00135227	0.0175439	0.0830508
47.575	0.0337838	0.00947306	0.00135227	0.0175439	0.0823729
47.597	0.0346284	0.00947306	0.00135227	0.0168691	0.0813559
47.618	0.035473	0.00888099	0.0020284	0.0161943	0.080339
47.639	0.0371622	0.00828893	0.0020284	0.0155196	0.079322
47.661	0.0380068	0.00769686	0.0020284	0.0148448	0.0786441
47.682	0.0388514	0.0071048	0.00270453	0.0148448	0.0776271
47.704	0.0396959	0.0071048	0.00270453	0.01417	0.0766102
47.725	0.0405405	0.00651273	0.00270453	0.0134953	0.0759322
47.747	0.0422297	0.00592066	0.00338066	0.0128205	0.0749153
47.768	0.0430743	0.0053286	0.00338066	0.0128205	0.0738983
47.79	0.0439189	0.0053286	0.00338066	0.0121457	0.0732203
47.811	0.0456081	0.00473653	0.0040568	0.011471	0.0722034
47.833	0.0464527	0.00414446	0.0040568	0.011471	0.0715254
47.854	0.0472973	0.00414446	0.00473293	0.0107962	0.0705085
47.876	0.0489865	0.0035524	0.00473293	0.0101215	0.0694915
47.897	0.0498311	0.0035524	0.00540906	0.0101215	0.0688136
47.918	0.0506757	0.00296033	0.00540906	0.00944669	0.0677966
47.94	0.0523649	0.00296033	0.00608519	0.00877193	0.0671186
47.961	0.0532095	0.00236827	0.00608519	0.00877193	0.0661017
47.983	0.0548986	0.00236827	0.00676133	0.00809717	0.0654237
48.004	0.0557432	0.0017762	0.00676133	0.00809717	0.0644068
48.026	0.0565878	0.0017762	0.00743746	0.0074224	0.0637288
48.047	0.058277	0.0017762	0.00811359	0.0074224	0.0627119
48.069	0.0591216	0.00118413	0.00811359	0.00674764	0.0620339
48.09	0.0608108	0.00118413	0.00878972	0.00607287	0.0610169
48.112	0.0616554	0.00118413	0.00946586	0.00607287	0.060339
48.133	0.0633446	0.000592066	0.00946586	0.00607287	0.059661
48.155	0.0650338	0.000592066	0.010142	0.00539811	0.0586441
48.176	0.0658784	0.000592066	0.0108181	0.00539811	0.0579661
48.197	0.0675676	0.000592066	0.0114943	0.00472335	0.0569492
48.219	0.0684122	0	0.0114943	0.00472335	0.0562712
48.24	0.0701014	0	0.0121704	0.00404858	0.0555932
48.262	0.0717905	0	0.0128465	0.00404858	0.0545763
48.283	0.0726351	0	0.0135227	0.00337382	0.0538983
48.305	0.0743243	0	0.0141988	0.00337382	0.0532203
48.326	0.0751689	0	0.0141988	0.00337382	0.0522034
48.348	0.0768581	0	0.0148749	0.00269906	0.0515254
48.369	0.0785473	0	0.015551	0.00269906	0.0508475
48.391	0.0802365	0	0.0162272	0.00269906	0.0501695
48.412	0.0810811	0	0.0169033	0.00202429	0.0491525
48.433	0.0827703	0	0.0175794	0.00202429	0.0484746
48.455	0.0844595	0	0.0182556	0.00202429	0.0477966
48.476	0.0861486	0	0.0189317	0.00202429	0.0471186
48.498	0.0869932	0	0.0196078	0.00134953	0.0464407
48.519	0.0886824	0	0.020284	0.00134953	0.0454237
48.541	0.0903716	0	0.0209601	0.00134953	0.0447458
48.562	0.0920608	0	0.0216362	0.00134953	0.0440678
48.584	0.09375	0.000592066	0.0223124	0.000674764	0.0433898
48.605	0.0945946	0.000592066	0.0229885	0.000674764	0.0427119
48.627	0.0962838	0.000592066	0.0236646	0.000674764	0.0420339
48.648	0.097973	0.000592066	0.0243408	0.000674764	0.0413559
48.67	0.0996622	0.00118413	0.0250169	0.000674764	0.040678
48.691	0.101351	0.00118413	0.025693	0.000674764	0.04
48.712	0.103041	0.00118413	0.0263692	0	0.0389831
48.734	0.10473	0.00118413	0.0277214	0	0.0383051
48.755	0.106419	0.0017762	0.0283976	0	0.0376271
48.777	0.108108	0.0017762	0.0290737	0	0.0369492
48.798	0.109797	0.0017762	0.0297498	0	0.0362712
48.82	0.111486	0.00236827	0.030426	0	0.0359322
48.841	0.113176	0.00236827	0.0311021	0	0.0352542
48.863	0.114865	0.00296033	0.0324544	0	0.0345763
48.884	0.116554	0.00296033	0.0331305	0	0.0338983
48.906	0.118243	0.0035524	0.0338066	0	0.0332203
48.927	0.119932	0.0035524	0.0351589	0	0.0325424
48.948	0.121622	0.00414446	0.035835	0	0.0318644
48.97	0.123311	0.00414446	0.0365112	0	0.0311864
48.991	0.125	0.00473653	0.0371873	0	0.0305085
49.013	0.126689	0.00473653	0.0385396	0	0.0301695
49.034	0.128378	0.0053286	0.0392157	0	0.0294915
49.056	0.130068	0.0053286	0.0398918	0	0.0288136
49.077	0.131757	0.00592066	0.0412441	0	0.0281356
49.099	0.134291	0.00592066	0.0419202	0	0.0274576
49.12	0.13598	0.00651273	0.0432725	0	0.0271186
49.142	0.137669	0.0071048	0.0439486	0	0.0264407
49.163	0.139358	0.0071048	0.0453009	0.000674764	0.0257627
49.185	0.141047	0.00769686	0.045977	0.000674764	0.0254237
49.206	0.142736	0.00828893	0.0466531	0.000674764	0.0247458
49.227	0.14527	0.00828893	0.0480054	0.000674764	0.0240678
49.249	0.146959	0.00888099	0.0486815	0.000674764	0.0237288
49.27	0.148649	0.00947306	0.0500338	0.000674764	0.0230508
49.292	0.150338	0.0100651	0.0507099	0.00134953	0.0223729
49.313	0.152872	0.0100651	0.0520622	0.00134953	0.0220339
49.335	0.154561	0.0106572	0.0527383	0.00134953	0.0213559
49.356	0.15625	0.0112493	0.0540906	0.00134953	0.0210169
49.378	0.157939	0.0118413	0.0554429	0.00202429	0.020339
49.399	0.160473	0.0118413	0.056119	0.00202429	0.02
49.421	0.162162	0.0124334	0.0574713	0.00202429	0.019322
49.442	0.163851	0.0130255	0.0581474	0.00202429	0.0189831
49.464	0.166385	0.0136175	0.0594997	0.00269906	0.0183051
49.485	0.168074	0.0142096	0.0608519	0.00269906	0.0179661
49.506	0.169764	0.0148017	0.0615281	0.00269906	0.0172881
49.528	0.172297	0.0148017	0.0628803	0.00337382	0.0169492
49.549	0.173986	0.0153937	0.0642326	0.00337382	0.0166102
49.571	0.175676	0.0159858	0.0649087	0.00337382	0.0159322
49.592	0.178209	0.0165779	0.066261	0.00404858	0.0155932
49.614	0.179899	0.0171699	0.0676133	0.00404858	0.0152542
49.635	0.182432	0.017762	0.0682894	0.00472335	0.0145763
49.657	0.184122	0.0183541	0.0696416	0.00472335	0.0142373
49.678	0.185811	0.0189461	0.0709939	0.00472335	0.0138983
49.7	0.188345	0.0195382	0.0723462	0.00539811	0.0135593
49.721	0.190034	0.0201303	0.0730223	0.00539811	0.0128814
49.742	0.192568	0.0207223	0.0743746	0.00607287	0.0125424
49.764	0.194257	0.0213144	0.0757268	0.00607287	0.0122034
49.785	0.196791	0.0219065	0.0770791	0.00674764	0.0118644
49.807	0.19848	0.0224985	0.0784314	0.00674764	0.0115254
49.828	0.201014	0.0230906	0.0797836	0.0074224	0.0111864
49.85	0.202703	0.0236827	0.0804598	0.0074224	0.0105085
49.871	0.205236	0.0242747	0.081812	0.00809717	0.0101695
49.893	0.206926	0.0248668	0.0831643	0.00809717	0.00983051
49.914	0.209459	0.0254589	0.0845166	0.00877193	0.00949153
49.936	0.211149	0.026643	0.0858688	0.00877193	0.00915254
49.957	0.213682	0.0272351	0.0872211	0.00944669	0.00881356
49.979	0.215372	0.0278271	0.0885734	0.0101215	0.00847458
50	0.217905	0.0284192	0.0899256	0.0101215	0.00813559
50.021	0.220439	0.0290112	0.0912779	0.0107962	0.00813559
50.043	0.222128	0.0296033	0.0926302	0.011471	0.00779661
50.064	0.224662	0.0301954	0.0939824	0.011471	0.00745763
50.086	0.226351	0.0313795	0.0953347	0.0121457	0.00711864
50.107	0.228885	0.0319716	0.096687	0.0121457	0.00677966
50.129	0.231419	0.0325636	0.0980392	0.0128205	0.00644068
50.15	0.233108	0.0331557	0.0993915	0.0134953	0.00610169
50.172	0.235642	0.0337478	0.100744	0.01417	0.00610169
50.193	0.237331	0.0349319	0.102096	0.01417	0.00576271
50.215	0.239865	0.035524	0.103448	0.0148448	0.00542373
50.236	0.242399	0.036116	0.104801	0.0155196	0.00508475
50.258	0.244088	0.0367081	0.106153	0.0155196	0.00508475
50.279	0.246622	0.0378922	0.107505	0.0161943	0.00474576
50.3	0.249155	0.0384843	0.109533	0.0168691	0.00440678
50.322	0.250845	0.0390764	0.110886	0.0175439	0.00440678
50.343	0.253378	0.0402605	0.112238	0.0182186	0.0040678
50.365	0.255912	0.0408526	0.11359	0.0182186	0.00372881
50.386	0.257601	0.0414446	0.114943	0.0188934	0.00372881
50.408	0.260135	0.0426288	0.116971	0.0195682	0.00338983
50.429	0.262669	0.0432208	0.118323	0.0202429	0.00338983
50.451	0.265203	0.044405	0.119675	0.0209177	0.00305085
50.472	0.266892	0.044997	0.121028	0.0215924	0.00271186
50.494	0.269426	0.0455891	0.12238	0.0215924	0.00271186
50.515	0.271959	0.0467732	0.124408	0.0222672	0.00237288
50.536	0.274493	0.0473653	0.125761	0.022942	0.00237288
50.558	0.276182	0.0485494	0.127113	0.0236167	0.00237288
50.579	0.278716	0.0491415	0.129141	0.0242915	0.0020339
50.601	0.28125	0.0503256	0.130494	0.0249663	0.0020339
50.622	0.283784	0.0509177	0.131846	0.025641	0.00169492
50.644	0.285473	0.0515098	0.133874	0.0263158	0.00169492
50.665	0.288007	0.0526939	0.135227	0.0269906	0.00135593
50.687	0.290541	0.053286	0.136579	0.0276653	0.00135593
50.708	0.293074	0.0544701	0.138607	0.0283401	0.00135593
50.73	0.295608	0.0556542	0.139959	0.0290148	0.00101695
50.751	0.297297	0.0562463	0.141312	0.0296896	0.00101695
50.773	0.299831	0.0574304	0.14334	0.0303644	0.00101695
50.794	0.302365	0.0580225	0.144692	0.0310391	0.00101695
50.815	0.304899	0.0592066	0.146721	0.0317139	0.000677966
50.837	0.307432	0.0597987	0.148073	0.0323887	0.000677966
50.858	0.309966	0.0609828	0.150101	0.0330634	0.000677966
50.88	0.311655	0.062167	0.151454	0.0337382	0.000677966
50.901	0.314189	0.062759	0.153482	0.034413	0.000338983
50.923	0.316723	0.0639432	0.154834	0.0350877	0.000338983
50.944	0.319257	0.0645352	0.156863	0.0357625	0.000338983
50.966	0.321791	0.0657194	0.158215	0.0364372	0.000338983
50.987	0.324324	0.0669035	0.160243	0.037112	0.000338983
51.009	0.326858	0.0674956	0.161596	0.0384615	0.000338983
51.03	0.328547	0.0686797	0.163624	0.0391363	0.000338983
51.052	0.331081	0.0698638	0.164976	0.0398111	0
51.073	0.333615	0.0704559	0.167005	0.0404858	0
51.094	0.336149	0.07164	0.168357	0.0411606	0
51.116	0.338682	0.0728242	0.170385	0.0418354	0
51.137	0.341216	0.0740083	0.172414	0.0431849	0
51.159	0.34375	0.0746004	0.173766	0.0438596	0
51.18	0.346284	0.0757845	0.175794	0.0445344	0
51.202	0.348818	0.0769686	0.177147	0.0452092	0
51.223	0.351351	0.0781528	0.179175	0.0458839	0
51.245	0.353885	0.0787448	0.181204	0.0472335	0
51.266	0.355574	0.079929	0.182556	0.0479082	0
51.288	0.358108	0.0811131	0.184584	0.048583	0
51.309	0.360642	0.0822972	0.186613	0.0492578	0
51.33	0.363176	0.0834813	0.187965	0.0506073	0.000338983
51.352	0.365709	0.0840734	0.189993	0.0512821	0.000338983
51.373	0.368243	0.0852575	0.192022	0.0519568	0.000338983
51.395	0.370777	0.0864417	0.193374	0.0526316	0.000338983
51.416	0.373311	0.0876258	0.195402	0.0539811	0.000338983
51.438	0.375845	0.0888099	0.197431	0.0546559	0.000338983
51.459	0.378378	0.0899941	0.199459	0.0553306	0.000338983
51.481	0.380912	0.0911782	0.200811	0.0566802	0.000677966
51.502	0.383446	0.0917703	0.20284	0.0573549	0.000677966
51.524	0.38598	0.0929544	0.204868	0.0580297	0.000677966
51.545	0.388514	0.0941385	0.206897	0.0593792	0.000677966
51.567	0.391047	0.0953227	0.208249	0.060054	0.00101695
51.588	0.393581	0.0965068	0.210277	0.0607287	0.00101695
51.609	0.396115	0.0976909	0.212306	0.0620783	0.00101695
51.631	0.398649	0.0988751	0.214334	0.062753	0.00135593
51.652	0.401182	0.100059	0.216362	0.0641026	0.00135593
51.674	0.403716	0.101243	0.217715	0.0647773	0.00135593
51.695	0.40625	0.102427	0.219743	0.0654521	0.00169492
51.717	0.408784	0.103612	0.221771	0.0668016	0.00169492
51.738	0.411318	0.104796	0.2238	0.0674764	0.00169492
51.76	0.413851	0.10598	0.225828	0.0688259	0.0020339
51.781	0.416385	0.107164	0.227857	0.0695007	0.0020339
51.803	0.418919	0.108348	0.229885	0.0701754	0.00237288
51.824	0.421453	0.109532	0.231237	0.071525	0.00237288
51.845	0.423142	0.110716	0.233266	0.0721997	0.00271186
51.867	0.425676	0.111901	0.235294	0.0735493	0.00271186
51.888	0.428209	0.113085	0.237323	0.074224	0.00305085
51.91	0.430743	0.114269	0.239351	0.0755735	0.00305085
51.931	0.433277	0.115453	0.241379	0.0762483	0.00338983
51.953	0.435811	0.116637	0.243408	0.0775978	0.00338983
51.974	0.438345	0.117821	0.245436	0.0782726	0.00372881
51.996	0.440878	0.119005	0.247465	0.0796221	0.00372881
52.017	0.443412	0.120189	0.249493	0.0802969	0.0040678
52.039	0.445946	0.121374	0.251521	0.0816464	0.0040678
52.06	0.44848	0.122558	0.25355	0.0823212	0.00440678
52.082	0.451014	0.123742	0.255578	0.0836707	0.00474576
52.103	0.453547	0.124926	0.25693	0.0843455	0.00474576
52.124	0.456081	0.12611	0.258959	0.085695	0.00508475
52.146	0.458615	0.127886	0.260987	0.0870445	0.00542373
52.167	0.461149	0.12907	0.263016	0.0877193	0.00542373
52.189	0.463682	0.130255	0.265044	0.0890688	0.00576271
52.21	0.466216	0.131439	0.267072	0.0897436	0.00610169
52.232	0.46875	0.132623	0.269101	0.0910931	0.00644068
52.253	0.471284	0.133807	0.271129	0.0924426	0.00644068
52.275	0.473818	0.134991	0.273158	0.0931174	0.00677966
52.296	0.476351	0.136767	0.275186	0.0944669	0.00711864
52.318	0.478885	0.137951	0.277214	0.0951417	0.00745763
52.339	0.481419	0.139136	0.279243	0.0964912	0.00779661
52.361	0.483953	0.14032	0.281271	0.0978408	0.00779661
52.382	0.486486	0.141504	0.2833	0.0985155	0.00813559
52.403	0.48902	0.14328	0.285328	0.099865	0.00847458
52.425	0.491554	0.144464	0.287356	0.101215	0.00881356
52.446	0.494088	0.145648	0.289385	0.101889	0.00915254
52.468	0.496622	0.146832	0.291413	0.103239	0.00949153
52.489	0.499155	0.148609	0.294118	0.104588	0.00983051
52.511	0.501689	0.149793	0.296146	0.105263	0.0101695
52.532	0.504223	0.150977	0.298174	0.106613	0.0105085
52.554	0.506757	0.152161	0.300203	0.107962	0.0108475
52.575	0.509291	0.153937	0.302231	0.108637	0.0111864
52.597	0.511824	0.155121	0.30426	0.109987	0.0115254
52.618	0.514358	0.156306	0.306288	0.111336	0.0118644
52.639	0.516892	0.158082	0.308316	0.112011	0.0125424
52.661	0.519426	0.159266	0.310345	0.11336	0.0128814
52.682	0.521115	0.16045	0.312373	0.11471	0.0132203
52.704	0.523649	0.162226	0.314402	0.116059	0.0135593
52.725	0.526182	0.16341	0.31643	0.116734	0.0138983
52.747	0.528716	0.164594	0.318458	0.118084	0.0145763
52.768	0.53125	0.166371	0.320487	0.119433	0.0149153
52.79	0.533784	0.167555	0.322515	0.120783	0.0152542
52.811	0.536318	0.168739	0.324544	0.121457	0.0159322
52.833	0.538851	0.170515	0.326572	0.122807	0.0162712
52.854	0.541385	0.171699	0.3286	0.124157	0.0166102
52.876	0.543919	0.173475	0.330629	0.125506	0.0172881
52.897	0.546453	0.17466	0.332657	0.126181	0.0176271
52.918	0.548142	0.175844	0.334686	0.12753	0.0179661
52.94	0.550676	0.17762	0.336714	0.12888	0.0186441
52.961	0.553209	0.178804	0.338742	0.130229	0.0189831
52.983	0.555743	0.18058	0.341447	0.131579	0.019661
53.004	0.558277	0.181764	0.343475	0.132254	0.02
53.026	0.560811	0.183541	0.345504	0.133603	0.020678
53.047	0.563345	0.184725	0.347532	0.134953	0.0213559
53.069	0.565034	0.186501	0.349561	0.136302	0.0216949
53.09	0.567568	0.187685	0.351589	0.137652	0.0223729
53.112	0.570101	0.189461	0.353617	0.139001	0.0230508
53.133	0.572635	0.190645	0.355646	0.140351	0.0233898
53.155	0.575169	0.192422	0.357674	0.141026	0.0240678
53.176	0.577703	0.193606	0.359703	0.142375	0.0247458
53.197	0.579392	0.195382	0.361731	0.143725	0.0250847
53.219	0.581926	0.196566	0.363759	0.145074	0.0257627
53.24	0.584459	0.198342	0.365788	0.146424	0.0264407
53.262	0.586993	0.199526	0.367816	0.147773	0.0271186
53.283	0.589527	0.201303	0.369844	0.149123	0.0277966
53.305	0.591216	0.202487	0.371873	0.150472	0.0284746
53.326	0.59375	0.204263	0.373901	0.151147	0.0291525
53.348	0.596284	0.206039	0.37593	0.152497	0.0294915
53.369	0.598818	0.207223	0.377958	0.153846	0.0301695
53.391	0.600507	0.208999	0.379986	0.155196	0.0308475
53.412	0.603041	0.210184	0.381339	0.156545	0.0315254
53.433	0.605574	0.21196	0.383367	0.157895	0.0322034
53.455	0.608108	0.213736	0.385396	0.159244	0.0332203
53.476	0.609797	0.21492	0.387424	0.160594	0.0338983
53.498	0.612331	0.216696	0.389452	0.161943	0.0345763
53.519	0.614865	0.21788	0.391481	0.163293	0.0352542
53.541	0.617399	0.219657	0.393509	0.164642	0.0359322
53.562	0.619088	0.221433	0.395538	0.165992	0.0366102
53.584	0.621622	0.222617	0.397566	0.167341	0.0372881
53.605	0.624155	0.224393	0.399594	0.168691	0.0383051
53.627	0.625845	0.226169	0.401623	0.17004	0.0389831
53.648	0.628378	0.227353	0.403651	0.17139	0.039661
53.67	0.630912	0.22913	0.405003	0.17274	0.040339
53.691	0.632601	0.230906	0.407032	0.174089	0.0413559
53.712	0.635135	0.23209	0.40906	0.175439	0.0420339
53.734	0.637669	0.233866	0.411089	0.176788	0.0430508
53.755	0.639358	0.235642	0.413117	0.178138	0.0437288
53.777	0.641892	0.236827	0.415145	0.179487	0.0444068
53.798	0.643581	0.238603	0.416498	0.180837	0.0454237
53.82	0.646115	0.240379	0.418526	0.182186	0.0461017
53.841	0.648649	0.241563	0.420554	0.183536	0.0471186
53.863	0.650338	0.243339	0.422583	0.184885	0.0477966
53.884	0.652872	0.245115	0.424611	0.186235	0.0488136
53.906	0.654561	0.246892	0.425963	0.187584	0.0494915
53.927	0.657095	0.248076	0.427992	0.188934	0.0505085
53.948	0.658784	0.249852	0.43002	0.190283	0.0511864
53.97	0.661318	0.251628	0.432049	0.191633	0.0522034
53.991	0.663851	0.253404	0.434077	0.192982	0.0532203
54.013	0.665541	0.254589	0.435429	0.194332	0.0538983
54.034	0.668074	0.256365	0.437458	0.195682	0.0549153
54.056	0.669764	0.258141	0.439486	0.197031	0.0559322
54.077	0.672297	0.259917	0.440838	0.198381	0.0566102
54.099	0.673986	0.261101	0.442867	0.19973	0.0576271
54.12	0.67652	0.262877	0.444895	0.20108	0.0586441
54.142	0.678209	0.264654	0.446247	0.202429	0.059661
54.163	0.679899	0.26643	0.448276	0.203779	0.060678
54.185	0.682432	0.267614	0.450304	0.205128	0.0613559
54.206	0.684122	0.26939	0.451657	0.206478	0.0623729
54.227	0.686655	0.271166	0.453685	0.207827	0.0633898
54.249	0.688345	0.272943	0.455713	0.209852	0.0644068
54.27	0.690878	0.274127	0.457066	0.211201	0.0654237
54.292	0.692568	0.275903	0.459094	0.212551	0.0664407
54.313	0.694257	0.277679	0.461122	0.2139	0.0674576
54.335	0.696791	0.279455	0.462475	0.21525	0.0684746
54.356	0.69848	0.280639	0.464503	0.216599	0.0694915
54.378	0.701014	0.282416	0.465855	0.217949	0.0705085
54.399	0.702703	0.284192	0.467884	0.219298	0.0715254
54.421	0.704392	0.285968	0.469912	0.220648	0.0725424
54.442	0.706926	0.287744	0.471264	0.221997	0.0735593
54.464	0.708615	0.288928	0.473293	0.223347	0.0745763
54.485	0.710304	0.290705	0.474645	0.225371	0.0759322
54.506	0.711993	0.292481	0.476673	0.226721	0.0769492
54.528	0.714527	0.294257	0.478026	0.22807	0.0779661
54.549	0.716216	0.295441	0.480054	0.22942	0.0789831
54.571	0.717905	0.297217	0.481406	0.230769	0.08
54.592	0.720439	0.298993	0.483435	0.232119	0.0813559
54.614	0.722128	0.30077	0.484787	0.233468	0.0823729
54.635	0.723818	0.302546	0.486815	0.234818	0.0833898
54.657	0.725507	0.30373	0.488168	0.236167	0.0847458
54.678	0.727196	0.305506	0.48952	0.238192	0.0857627
54.7	0.72973	0.307282	0.491548	0.239541	0.0867797
54.721	0.731419	0.309059	0.492901	0.240891	0.0881356
54.742	0.733108	0.310243	0.494929	0.24224	0.0891525
54.764	0.734797	0.312019	0.496281	0.24359	0.0905085
54.785	0.736486	0.313795	0.49831	0.244939	0.0915254
54.807	0.73902	0.315571	0.499662	0.246289	0.0928814
54.828	0.740709	0.316755	0.501014	0.248313	0.0942373
54.85	0.742399	0.318532	0.503043	0.249663	0.0952542
54.871	0.744088	0.320308	0.504395	0.251012	0.0966102
54.893	0.745777	0.322084	0.505747	0.252362	0.0976271
54.914	0.747466	0.323268	0.507776	0.253711	0.0989831
54.936	0.749155	0.325044	0.509128	0.255061	0.100339
54.957	0.750845	0.326821	0.51048	0.25641	0.101695
54.979	0.752534	0.328597	0.512508	0.258435	0.102712
55	0.754223	0.329781	0.513861	0.259784	0.104068
55.021	0.755912	0.331557	0.515213	0.261134	0.105424
55.043	0.757601	0.333333	0.516565	0.262483	0.10678
55.064	0.759291	0.33511	0.518594	0.263833	0.108136
55.086	0.76098	0.336294	0.519946	0.265182	0.109492
55.107	0.762669	0.33807	0.521298	0.267206	0.110508
55.129	0.764358	0.339846	0.52265	0.268556	0.111864
55.15	0.766047	0.341622	0.524003	0.269906	0.11322
55.172	0.767736	0.342806	0.526031	0.271255	0.114576
55.193	0.769426	0.344583	0.527383	0.272605	0.115932
55.215	0.771115	0.346359	0.528736	0.274629	0.117627
55.236	0.772804	0.348135	0.530088	0.275978	0.118983
55.258	0.774493	0.349319	0.53144	0.277328	0.120339
55.279	0.776182	0.351095	0.532792	0.278677	0.121695
55.3	0.777872	0.352872	0.534821	0.280027	0.123051
55.322	0.779561	0.354648	0.536173	0.281377	0.124407
55.343	0.78125	0.355832	0.537525	0.283401	0.125763
55.365	0.782939	0.357608	0.538878	0.28475	0.127458
55.386	0.783784	0.359384	0.54023	0.2861	0.128814
55.408	0.785473	0.36116	0.541582	0.287449	0.130169
55.429	0.787162	0.362345	0.542934	0.289474	0.131864
55.451	0.788851	0.364121	0.544287	0.290823	0.13322
55.472	0.790541	0.365897	0.545639	0.292173	0.134576
55.494	0.79223	0.367673	0.546991	0.293522	0.136271
55.515	0.793074	0.368857	0.548343	0.294872	0.137627
55.536	0.794764	0.370634	0.549696	0.296896	0.139322
55.558	0.796453	0.37241	0.551048	0.298246	0.140678
55.579	0.798142	0.374186	0.5524	0.299595	0.142373
55.601	0.798986	0.37537	0.553753	0.300945	0.143729
55.622	0.800676	0.377146	0.555105	0.302969	0.145424
55.644	0.802365	0.378922	0.556457	0.304318	0.14678
55.665	0.804054	0.380699	0.557809	0.305668	0.148475
55.687	0.804899	0.381883	0.559162	0.307018	0.149831
55.708	0.806588	0.383659	0.560514	0.309042	0.151525
55.73	0.808277	0.385435	0.561866	0.310391	0.15322
55.751	0.809122	0.386619	0.563218	0.311741	0.154576
55.773	0.810811	0.388396	0.564571	0.313765	0.156271
55.794	0.8125	0.390172	0.565923	0.315115	0.157966
55.815	0.813345	0.391948	0.567275	0.316464	0.159322
55.837	0.815034	0.393132	0.567951	0.317814	0.161017
55.858	0.816723	0.394908	0.569304	0.319838	0.162712
55.88	0.817568	0.396684	0.570656	0.321188	0.164068
55.901	0.819257	0.398461	0.572008	0.322537	0.165763
55.923	0.820946	0.399645	0.57336	0.323887	0.167458
55.944	0.821791	0.401421	0.574713	0.325911	0.169153
55.966	0.82348	0.403197	0.575389	0.32726	0.170847
55.987	0.824324	0.404973	0.576741	0.32861	0.172542
56.009	0.826014	0.406157	0.578093	0.330634	0.173898
56.03	0.826858	0.407934	0.579446	0.331984	0.175593
56.052	0.828547	0.40971	0.580798	0.333333	0.177288
56.073	0.830236	0.411486	0.581474	0.335358	0.178983
56.094	0.831081	0.41267	0.582826	0.336707	0.180678
56.116	0.83277	0.414446	0.584178	0.338057	0.182373
56.137	0.833615	0.416223	0.585531	0.340081	0.184068
56.159	0.835304	0.417999	0.586207	0.34143	0.185763
56.18	0.836149	0.419183	0.587559	0.34278	0.187458
56.202	0.837838	0.420959	0.588911	0.344804	0.188814
56.223	0.838682	0.422735	0.590264	0.346154	0.190508
56.245	0.840372	0.424512	0.59094	0.347503	0.192203
56.266	0.841216	0.425696	0.592292	0.349528	0.193898
56.288	0.842061	0.427472	0.593644	0.350877	0.195593
56.309	0.84375	0.429248	0.59432	0.352227	0.197288
56.33	0.844595	0.431024	0.595673	0.354251	0.198983
56.352	0.846284	0.432208	0.597025	0.355601	0.200678
56.373	0.847128	0.433985	0.597701	0.35695	0.202373
56.395	0.848818	0.435761	0.599053	0.358974	0.204068
56.416	0.849662	0.437537	0.600406	0.360324	0.205763
56.438	0.850507	0.438721	0.601082	0.361673	0.207458
56.459	0.852196	0.440497	0.602434	0.363698	0.209153
56.481	0.853041	0.442274	0.603786	0.365047	0.210847
56.502	0.85473	0.44405	0.604462	0.366397	0.212542
56.524	0.855574	0.445234	0.605815	0.368421	0.214576
56.545	0.856419	0.44701	0.606491	0.369771	0.216271
56.567	0.858108	0.448786	0.607843	0.37112	0.217966
56.588	0.858953	0.450562	0.609195	0.373144	0.219661
56.609	0.859797	0.451747	0.609872	0.374494	0.221356
56.631	0.861486	0.453523	0.611224	0.375843	0.223051
56.652	0.862331	0.455299	0.6119	0.377868	0.224746
56.674	0.863176	0.457075	0.613252	0.379217	0.226441
56.695	0.864865	0.458259	0.613928	0.381242	0.228136
56.717	0.865709	0.460036	0.615281	0.382591	0.229831
56.738	0.866554	0.461812	0.615957	0.383941	0.231525
56.76	0.867399	0.463588	0.617309	0.385965	0.23322
56.781	0.869088	0.465364	0.618661	0.387314	0.235254
56.803	0.869932	0.466548	0.619337	0.388664	0.236949
56.824	0.870777	0.468324	0.62069	0.390688	0.238644
56.845	0.871622	0.470101	0.621366	0.392038	0.240339
56.867	0.873311	0.471877	0.622718	0.393387	0.242034
56.888	0.874155	0.473061	0.623394	0.395412	0.243729
56.91	0.875	0.474837	0.624746	0.396761	0.245424
56.931	0.875845	0.476613	0.625423	0.398785	0.247119
56.953	0.876689	0.47839	0.626775	0.400135	0.248814
56.974	0.878378	0.479574	0.627451	0.401484	0.250847
56.996	0.879223	0.48135	0.628803	0.403509	0.252542
57.017	0.880068	0.483126	0.629479	0.404858	0.254237
57.039	0.880912	0.484902	0.630156	0.406208	0.255932
57.06	0.881757	0.486679	0.631508	0.408232	0.257627
57.082	0.883446	0.487863	0.632184	0.409582	0.259322
57.103	0.884291	0.489639	0.633536	0.411606	0.261017
57.124	0.885135	0.491415	0.634212	0.412955	0.263051
57.146	0.88598	0.493191	0.635565	0.414305	0.264746
57.167	0.886824	0.494375	0.636241	0.416329	0.266441
57.189	0.887669	0.496152	0.636917	0.417679	0.268136
57.21	0.888514	0.497928	0.638269	0.419028	0.269831
57.232	0.889358	0.499704	0.638945	0.421053	0.271525
57.253	0.890203	0.500888	0.640297	0.422402	0.273559
57.275	0.891047	0.502664	0.640974	0.424426	0.275254
57.296	0.892736	0.50444	0.64165	0.425776	0.276949
57.318	0.893581	0.506217	0.643002	0.427126	0.278644
57.339	0.894426	0.507401	0.643678	0.42915	0.280339
57.361	0.89527	0.509177	0.64503	0.430499	0.282034
57.382	0.896115	0.510953	0.645707	0.432524	0.284068
57.403	0.896959	0.512729	0.646383	0.433873	0.285763
57.425	0.897804	0.514506	0.647735	0.435223	0.287458
57.446	0.898649	0.51569	0.648411	0.437247	0.289153
57.468	0.899493	0.517466	0.649087	0.438596	0.290847
57.489	0.900338	0.519242	0.650439	0.439946	0.292881
57.511	0.901182	0.520426	0.651116	0.44197	0.294576
57.532	0.902027	0.522202	0.651792	0.44332	0.296271
57.554	0.902872	0.523979	0.653144	0.445344	0.297966
57.575	0.903716	0.525755	0.65382	0.446694	0.299661
57.597	0.904561	0.526939	0.654496	0.448043	0.301695
57.618	0.905405	0.528715	0.655172	0.450067	0.30339
57.639	0.90625	0.530491	0.656525	0.451417	0.305085
57.661	0.90625	0.532268	0.657201	0.452767	0.30678
57.682	0.907095	0.533452	0.657877	0.454791	0.308475
57.704	0.907939	0.535228	0.659229	0.45614	0.310508
57.725	0.908784	0.537004	0.659905	0.45749	0.312203
57.747	0.909628	0.53878	0.660581	0.459514	0.313898
57.768	0.910473	0.539964	0.661258	0.460864	0.315593
57.79	0.911318	0.541741	0.66261	0.462888	0.317627
57.811	0.912162	0.543517	0.663286	0.464238	0.319322
57.833	0.913007	0.544701	0.663962	0.465587	0.321017
57.854	0.913007	0.546477	0.664638	0.467611	0.322712
57.876	0.913851	0.548253	0.665314	0.468961	0.324746
57.897	0.914696	0.549438	0.666667	0.47031	0.326441
57.918	0.915541	0.551214	0.667343	0.472335	0.328136
57.94	0.916385	0.55299	0.668019	0.473684	0.329831
57.961	0.91723	0.554174	0.668695	0.475034	0.331864
57.983	0.91723	0.55595	0.669371	0.477058	0.333559
58.004	0.918074	0.557726	0.670723	0.478408	0.335254
58.026	0.918919	0.558911	0.6714	0.480432	0.336949
58.047	0.919764	0.560687	0.672076	0.481781	0.338983
58.069	0.920608	0.562463	0.672752	0.483131	0.340678
58.09	0.920608	0.563647	0.673428	0.485155	0.342373
58.112	0.921453	0.565423	0.674104	0.486505	0.344068
58.133	0.922297	0.5672	0.67478	0.487854	0.346102
58.155	0.923142	0.568384	0.676133	0.489879	0.347797
58.176	0.923142	0.57016	0.676809	0.491228	0.349492
58.197	0.923986	0.571936	0.677485	0.492578	0.351525
58.219	0.924831	0.57312	0.678161	0.494602	0.35322
58.24	0.924831	0.574896	0.678837	0.495951	0.354915
58.262	0.925676	0.576081	0.679513	0.497301	0.35661
58.283	0.92652	0.577857	0.680189	0.499325	0.358644
58.305	0.92652	0.579633	0.680865	0.500675	0.360339
58.326	0.927365	0.580817	0.681542	0.502024	0.362034
58.348	0.928209	0.582593	0.682218	0.504049	0.363729
58.369	0.928209	0.583777	0.682894	0.505398	0.365763
58.391	0.929054	0.585554	0.68357	0.506748	0.367458
58.412	0.929899	0.58733	0.684922	0.508772	0.369153
58.433	0.929899	0.588514	0.685598	0.510121	0.371186
58.455	0.930743	0.59029	0.686275	0.511471	0.372881
58.476	0.931588	0.591474	0.686951	0.513495	0.374576
58.498	0.931588	0.59325	0.687627	0.514845	0.376271
58.519	0.932432	0.594435	0.688303	0.516194	0.377966
58.541	0.932432	0.596211	0.688979	0.518219	0.38
58.562	0.933277	0.597395	0.689655	0.519568	0.381695
58.584	0.934122	0.599171	0.690331	0.520918	0.38339
58.605	0.934122	0.600355	0.691007	0.522942	0.385085
58.627	0.934966	0.602131	0.691684	0.524291	0.387119
58.648	0.934966	0.603316	0.69236	0.525641	0.388814
58.67	0.935811	0.605092	0.693036	0.526991	0.390508
58.691	0.935811	0.606276	0.693712	0.529015	0.392203
58.712	0.936655	0.608052	0.694388	0.530364	0.393898
58.734	0.936655	0.609236	0.695064	0.531714	0.395593
58.755	0.9375	0.611012	0.69574	0.533738	0.397627
58.777	0.9375	0.612197	0.696416	0.535088	0.399322
58.798	0.938345	0.613973	0.696416	0.536437	0.401017
58.82	0.938345	0.615157	0.697093	0.538462	0.402712
58.841	0.939189	0.616933	0.697769	0.539811	0.404407
58.863	0.939189	0.618117	0.698445	0.541161	0.406102
58.884	0.940034	0.619301	0.699121	0.54251	0.407797
58.906	0.940034	0.621078	0.699797	0.544534	0.409492
58.927	0.940034	0.622262	0.700473	0.545884	0.411186
58.948	0.940878	0.624038	0.701149	0.547233	0.412881
58.97	0.940878	0.625222	0.701826	0.548583	0.414576
58.991	0.941723	0.626406	0.702502	0.550607	0.416271
59.013	0.941723	0.628182	0.703178	0.551957	0.417966
59.034	0.941723	0.629366	0.703854	0.553306	0.419661
59.056	0.942568	0.630551	0.70453	0.555331	0.421356
59.077	0.942568	0.632327	0.70453	0.55668	0.423051
59.099	0.943412	0.633511	0.705206	0.55803	0.424746
59.12	0.943412	0.634695	0.705882	0.559379	0.426441
59.142	0.943412	0.636471	0.706558	0.561404	0.428136
59.163	0.944257	0.637655	0.707235	0.562753	0.429831
59.185	0.944257	0.63884	0.707911	0.564103	0.431525
59.206	0.944257	0.640616	0.708587	0.565452	0.432881
59.227	0.945101	0.6418	0.709263	0.567476	0.434576
59.249	0.945101	0.642984	0.709263	0.568826	0.436271
59.27	0.945101	0.644168	0.709939	0.570175	0.437966
59.292	0.945101	0.645944	0.710615	0.571525	0.439661
59.313	0.945946	0.647128	0.711291	0.572874	0.441356
59.335	0.945946	0.648313	0.711968	0.574899	0.442712
59.356	0.945946	0.649497	0.712644	0.576248	0.444407
59.378	0.946791	0.650681	0.71332	0.577598	0.446102
59.399	0.946791	0.652457	0.71332	0.578947	0.447797
59.421	0.946791	0.653641	0.713996	0.580972	0.449153
59.442	0.946791	0.654825	0.714672	0.582321	0.450847
59.464	0.946791	0.656009	0.715348	0.583671	0.452542
59.485	0.947635	0.657194	0.716024	0.58502	0.454237
59.506	0.947635	0.658378	0.7167	0.58637	0.455593
59.528	0.947635	0.659562	0.7167	0.588394	0.457288
59.549	0.947635	0.661338	0.717377	0.589744	0.458983
59.571	0.947635	0.662522	0.718053	0.591093	0.460339
59.592	0.94848	0.663706	0.718729	0.592443	0.462034
59.614	0.94848	0.66489	0.719405	0.593792	0.463729
59.635	0.94848	0.666075	0.719405	0.595142	0.465085
59.657	0.94848	0.667259	0.720081	0.597166	0.46678
59.678	0.94848	0.668443	0.720757	0.598516	0.468136
59.7	0.94848	0.669627	0.721433	0.599865	0.469831
59.721	0.949324	0.670811	0.72211	0.601215	0.471525
59.742	0.949324	0.671995	0.722786	0.602564	0.472881
59.764	0.949324	0.673179	0.722786	0.604588	0.474576
59.785	0.949324	0.674364	0.723462	0.605938	0.475932
59.807	0.949324	0.675548	0.724138	0.607287	0.477627
59.828	0.949324	0.676732	0.724814	0.608637	0.479322
59.85	0.949324	0.677916	0.72549	0.609987	0.480678
59.871	0.949324	0.6791	0.72549	0.611336	0.482373
59.893	0.949324	0.680284	0.726166	0.61336	0.483729
59.914	0.949324	0.681468	0.726842	0.61471	0.485424
59.936	0.949324	0.682652	0.727519	0.616059	0.48678
59.957	0.949324	0.683837	0.727519	0.617409	0.488475
59.979	0.950169	0.685021	0.728195	0.618758	0.489831
60	0.950169	0.685613	0.728871	0.620108	0.491525
60.021	0.950169	0.686797	0.729547	0.621457	0.492881
60.043	0.950169	0.687981	0.730223	0.623482	0.494576
60.064	0.950169	0.689165	0.730223	0.624831	0.495932
60.086	0.950169	0.690349	0.730899	0.626181	0.497627
60.107	0.950169	0.691533	0.731575	0.62753	0.498983
60.129	0.950169	0.692718	0.732252	0.62888	0.500678
60.15	0.950169	0.69331	0.732928	0.630229	0.502373
60.172	0.950169	0.694494	0.732928	0.631579	0.503729
60.193	0.950169	0.695678	0.733604	0.632928	0.505424
60.215	0.950169	0.696862	0.73428	0.634278	0.50678
60.236	0.950169	0.698046	0.734956	0.636302	0.508475
60.258	0.950169	0.698638	0.734956	0.637652	0.509831
60.279	0.950169	0.699822	0.735632	0.639001	0.511525
60.3	0.950169	0.701007	0.736308	0.640351	0.512881
60.322	0.950169	0.702191	0.736984	0.6417	0.514576
60.343	0.949324	0.702783	0.737661	0.64305	0.515932
60.365	0.949324	0.703967	0.737661	0.644399	0.517288
60.386	0.949324	0.705151	0.738337	0.645749	0.518983
60.408	0.949324	0.705743	0.739013	0.647099	0.520339
60.429	0.949324	0.706927	0.739689	0.648448	0.522034
60.451	0.949324	0.708111	0.740365	0.649798	0.52339
60.472	0.949324	0.709295	0.740365	0.651147	0.525085
60.494	0.949324	0.709888	0.741041	0.652497	0.526441
60.515	0.949324	0.711072	0.741717	0.654521	0.528136
60.536	0.949324	0.712256	0.742394	0.65587	0.529492
60.558	0.949324	0.712848	0.742394	0.65722	0.531186
60.579	0.949324	0.714032	0.74307	0.65857	0.532542
60.601	0.949324	0.714624	0.743746	0.659919	0.534237
60.622	0.949324	0.715808	0.744422	0.661269	0.535593
60.644	0.94848	0.716992	0.745098	0.662618	0.537288
60.665	0.94848	0.717584	0.745098	0.663968	0.538644
60.687	0.94848	0.718769	0.745774	0.665317	0.540339
60.708	0.94848	0.719361	0.74645	0.666667	0.541695
60.73	0.94848	0.720545	0.747126	0.668016	0.54339
60.751	0.94848	0.721729	0.747803	0.669366	0.544746
60.773	0.94848	0.722321	0.747803	0.670715	0.546102
60.794	0.94848	0.723505	0.748479	0.672065	0.547797
60.815	0.94848	0.724097	0.749155	0.673414	0.549153
60.837	0.947635	0.725281	0.749831	0.674764	0.550847
60.858	0.947635	0.725873	0.750507	0.676113	0.552203
60.88	0.947635	0.727057	0.751183	0.677463	0.553898
60.901	0.947635	0.727649	0.751183	0.678812	0.555254
60.923	0.947635	0.728834	0.751859	0.680162	0.55661
60.944	0.947635	0.729426	0.752535	0.681511	0.558305
60.966	0.947635	0.73061	0.753212	0.682861	0.559661
60.987	0.946791	0.731202	0.753888	0.684211	0.561356
61.009	0.946791	0.732386	0.753888	0.68556	0.562712
61.03	0.946791	0.732978	0.754564	0.68691	0.564068
61.052	0.946791	0.734162	0.75524	0.688259	0.565763
61.073	0.946791	0.734754	0.755916	0.689609	0.567119
61.094	0.946791	0.735938	0.756592	0.690958	0.568814
61.116	0.945946	0.73653	0.757268	0.692308	0.570169
61.137	0.945946	0.737715	0.757268	0.693657	0.571525
61.159	0.945946	0.738307	0.757945	0.695007	0.57322
61.18	0.945946	0.739491	0.758621	0.696356	0.574576
61.202	0.945946	0.740083	0.759297	0.697031	0.575932
61.223	0.945946	0.740675	0.759973	0.698381	0.577627
61.245	0.945946	0.741859	0.760649	0.69973	0.578983
61.266	0.945101	0.742451	0.760649	0.70108	0.580339
61.288	0.945101	0.743635	0.761325	0.702429	0.582034
61.309	0.945101	0.744227	0.762001	0.703779	0.58339
61.33	0.945101	0.744819	0.762677	0.705128	0.584746
61.352	0.945101	0.746004	0.763354	0.706478	0.586102
61.373	0.944257	0.746596	0.76403	0.707827	0.587797
61.395	0.944257	0.74778	0.764706	0.709177	0.589153
61.416	0.944257	0.748372	0.764706	0.710526	0.590508
61.438	0.944257	0.748964	0.765382	0.711876	0.592203
61.459	0.944257	0.750148	0.766058	0.713225	0.593559
61.481	0.944257	0.75074	0.766734	0.714575	0.594915
61.502	0.943412	0.751924	0.76741	0.715924	0.596271
61.524	0.943412	0.752516	0.768087	0.716599	0.597966
61.545	0.943412	0.753108	0.768763	0.717949	0.599322
61.567	0.943412	0.754292	0.768763	0.719298	0.600678
61.588	0.943412	0.754885	0.769439	0.720648	0.602034
61.609	0.942568	0.755477	0.770115	0.721997	0.60339
61.631	0.942568	0.756661	0.770791	0.723347	0.605085
61.652	0.942568	0.757253	0.771467	0.724696	0.606441
61.674	0.942568	0.757845	0.772143	0.726046	0.607797
61.695	0.942568	0.759029	0.772819	0.727395	0.609153
61.717	0.942568	0.759621	0.772819	0.728745	0.610508
61.738	0.941723	0.760805	0.773496	0.72942	0.611864
61.76	0.941723	0.761397	0.774172	0.730769	0.613559
61.781	0.941723	0.761989	0.774848	0.732119	0.614915
61.803	0.941723	0.763173	0.775524	0.733468	0.616271
61.824	0.941723	0.763766	0.7762	0.734818	0.617627
61.845	0.940878	0.764358	0.776876	0.736167	0.618983
61.867	0.940878	0.765542	0.776876	0.737517	0.620339
61.888	0.940878	0.766134	0.777552	0.738866	0.621695
61.91	0.940878	0.766726	0.778229	0.739541	0.623051
61.931	0.940878	0.76791	0.778905	0.740891	0.624746
61.953	0.940878	0.768502	0.779581	0.74224	0.626102
61.974	0.940034	0.769094	0.780257	0.74359	0.627458
61.996	0.940034	0.770278	0.780933	0.744939	0.628814
62.017	0.940034	0.77087	0.781609	0.746289	0.630169
62.039	0.940034	0.771462	0.781609	0.747638	0.631525
62.06	0.940034	0.772647	0.782285	0.748988	0.632881
62.082	0.939189	0.773239	0.782961	0.749663	0.634237
62.103	0.939189	0.773831	0.783638	0.751012	0.635593
62.124	0.939189	0.775015	0.784314	0.752362	0.636949
62.146	0.939189	0.775607	0.78499	0.753711	0.638305
62.167	0.939189	0.776199	0.785666	0.755061	0.639661
62.189	0.939189	0.776791	0.786342	0.75641	0.641017
62.21	0.938345	0.777975	0.787018	0.757085	0.642373
62.232	0.938345	0.778567	0.787018	0.758435	0.643729
62.253	0.938345	0.779159	0.787694	0.759784	0.645085
62.275	0.938345	0.780343	0.788371	0.761134	0.646441
62.296	0.938345	0.780935	0.789047	0.762483	0.647797
62.318	0.9375	0.781528	0.789723	0.763833	0.649153
62.339	0.9375	0.782712	0.790399	0.764507	0.650508
62.361	0.9375	0.783304	0.791075	0.765857	0.651864
62.382	0.9375	0.783896	0.791751	0.767206	0.65322
62.403	0.9375	0.78508	0.792427	0.768556	0.654576
62.425	0.9375	0.785672	0.793103	0.769906	0.655932
62.446	0.936655	0.786264	0.793103	0.77058	0.657288
62.468	0.936655	0.786856	0.79378	0.77193	0.658644
62.489	0.936655	0.78804	0.794456	0.773279	0.66
62.511	0.936655	0.788632	0.795132	0.774629	0.661017
62.532	0.936655	0.789224	0.795808	0.775304	0.662373
62.554	0.936655	0.790409	0.796484	0.776653	0.663729
62.575	0.936655	0.791001	0.79716	0.778003	0.665085
62.597	0.935811	0.791593	0.797836	0.779352	0.666441
62.618	0.935811	0.792777	0.798513	0.780027	0.667797
62.639	0.935811	0.793369	0.799189	0.781377	0.669153
62.661	0.935811	0.793961	0.799189	0.782726	0.670169
62.682	0.935811	0.794553	0.799865	0.784076	0.671525
62.704	0.935811	0.795737	0.800541	0.78475	0.672881
62.725	0.935811	0.796329	0.801217	0.7861	0.674237
62.747	0.934966	0.796921	0.801893	0.787449	0.675593
62.768	0.934966	0.797513	0.802569	0.788799	0.676949
62.79	0.934966	0.798697	0.803245	0.789474	0.677966
62.811	0.934966	0.79929	0.803922	0.790823	0.679322
62.833	0.934966	0.799882	0.804598	0.792173	0.680678
62.854	0.934966	0.801066	0.805274	0.792848	0.682034
62.876	0.934966	0.801658	0.80595	0.794197	0.683051
[truncated: 3,533 more rows]
