# Supplementary material for: Drug targeting Nsp1-ribosomal complex shows antiviral activity against SARS-CoV-2
Source: eLife journal article supplement (doi:10.7554/elife.74877), 2022-03-24
Supplement: supp [file Figure 1 source data 4_RMSD Binding energy.xlsx]

## Sheet: Montelukast
Time	Replica_1	Replica_2	Replica_3
0	0.000493	0.0004877	0.0004895
0.01	0.096407	0.0915001	0.0777274
0.02	0.089599	0.100194	0.116131
0.03	0.09688	0.103404	0.0906856
0.04	0.105224	0.113028	0.0934861
0.05	0.098701	0.124619	0.0880922
0.06	0.103171	0.136659	0.137017
0.07	0.086829	0.148878	0.128011
0.08	0.09808	0.157811	0.184477
0.09	0.108833	0.151797	0.215444
0.1	0.119934	0.186152	0.191802
0.11	0.150331	0.176755	0.168817
0.12	0.136393	0.212991	0.173199
0.13	0.122176	0.210266	0.153156
0.14	0.141016	0.224796	0.169938
0.15	0.150976	0.222622	0.144332
0.16	0.180212	0.231839	0.165814
0.17	0.17976	0.182626	0.155218
0.18	0.137623	0.183138	0.181539
0.19	0.138367	0.1944	0.167211
0.2	0.124904	0.183551	0.186041
0.21	0.105943	0.194374	0.260784
0.22	0.098811	0.160349	0.275309
0.23	0.119363	0.17022	0.311465
0.24	0.136928	0.186395	0.245165
0.25	0.154059	0.178659	0.226394
0.26	0.174878	0.162055	0.246801
0.27	0.167486	0.145986	0.228416
0.28	0.171338	0.132935	0.207472
0.29	0.173367	0.151354	0.233353
0.3	0.148172	0.203483	0.218874
0.31	0.143942	0.181998	0.18926
0.32	0.148698	0.187146	0.248807
0.33	0.155084	0.202462	0.277628
0.34	0.128538	0.157693	0.251072
0.35	0.158322	0.186773	0.230822
0.36	0.170139	0.237306	0.242932
0.37	0.190958	0.216561	0.236535
0.38	0.203999	0.20936	0.224713
0.39	0.2206	0.206545	0.190259
0.4	0.233382	0.200234	0.184178
0.41	0.241086	0.21065	0.1856
0.42	0.265287	0.194201	0.152987
0.43	0.276256	0.190486	0.192629
0.44	0.264838	0.190467	0.158001
0.45	0.237822	0.18374	0.200692
0.46	0.204885	0.178208	0.187288
0.47	0.223935	0.14046	0.164755
0.48	0.222726	0.172963	0.219733
0.49	0.224027	0.162804	0.253242
0.5	0.191551	0.129764	0.226772
0.51	0.178559	0.135179	0.232812
0.52	0.197989	0.13625	0.247106
0.53	0.228295	0.131085	0.206152
0.54	0.19603	0.172037	0.23114
0.55	0.224362	0.162439	0.238319
0.56	0.229384	0.172386	0.25337
0.57	0.23843	0.136797	0.252846
0.58	0.268152	0.145419	0.26807
0.59	0.291357	0.149773	0.235184
0.6	0.288776	0.159948	0.198807
0.61	0.33742	0.180357	0.223736
0.62	0.357969	0.182064	0.216324
0.63	0.376141	0.165892	0.218576
0.64	0.369273	0.139501	0.1832
0.65	0.387842	0.140035	0.228206
0.66	0.376543	0.127512	0.264382
0.67	0.368967	0.171162	0.277832
0.68	0.371668	0.194784	0.240145
0.69	0.376916	0.2209	0.247436
0.7	0.431705	0.218272	0.207744
0.71	0.4458	0.212363	0.252256
0.72	0.465703	0.227774	0.220658
0.73	0.40936	0.199861	0.273614
0.74	0.458856	0.207747	0.280548
0.75	0.464282	0.192415	0.28009
0.76	0.406733	0.218593	0.288721
0.77	0.40225	0.238592	0.309203
0.78	0.401417	0.227255	0.27549
0.79	0.364848	0.253337	0.260684
0.8	0.402922	0.220501	0.272006
0.81	0.396209	0.169923	0.28356
0.82	0.38845	0.193963	0.254032
0.83	0.419634	0.21335	0.240271
0.84	0.393998	0.205128	0.229861
0.85	0.364796	0.18772	0.252796
0.86	0.410805	0.203666	0.198298
0.87	0.446912	0.20475	0.263219
0.88	0.417794	0.223963	0.240755
0.89	0.409671	0.269352	0.232381
0.9	0.412933	0.259921	0.234004
0.91	0.382846	0.212931	0.227902
0.92	0.403315	0.234827	0.207964
0.93	0.381772	0.23463	0.222196
0.94	0.334896	0.208355	0.209562
0.95	0.344404	0.197865	0.186191
0.96	0.329186	0.251577	0.256275
0.97	0.321827	0.272581	0.255299
0.98	0.303984	0.27341	0.279386
0.99	0.317271	0.261991	0.334653
1	0.319553	0.285355	0.327819
1.01	0.309955	0.283096	0.318713
1.02	0.312538	0.28806	0.335885
1.03	0.307046	0.263177	0.275075
1.04	0.33527	0.277234	0.308993
1.05	0.299642	0.264484	0.367031
1.06	0.319171	0.280953	0.346794
1.07	0.302341	0.311567	0.297823
1.08	0.297062	0.301741	0.300529
1.09	0.312481	0.298715	0.308114
1.1	0.331756	0.309242	0.316665
1.11	0.330167	0.248843	0.317889
1.12	0.362333	0.252684	0.310237
1.13	0.328029	0.233127	0.321912
1.14	0.332002	0.265978	0.308983
1.15	0.327265	0.269537	0.297664
1.16	0.35435	0.276249	0.318673
1.17	0.358245	0.254321	0.327483
1.18	0.356344	0.288493	0.304536
1.19	0.31779	0.341751	0.293654
1.2	0.299867	0.299153	0.309317
1.21	0.331609	0.319776	0.304076
1.22	0.357193	0.291248	0.251925
1.23	0.400764	0.293348	0.309633
1.24	0.384367	0.259965	0.254676
1.25	0.400793	0.221139	0.210764
1.26	0.444474	0.213087	0.218986
1.27	0.39483	0.237869	0.230112
1.28	0.416044	0.243466	0.227129
1.29	0.428577	0.219135	0.192563
1.3	0.497867	0.246667	0.18449
1.31	0.519785	0.226027	0.175119
1.32	0.502333	0.24491	0.177099
1.33	0.485822	0.250791	0.180847
1.34	0.502173	0.277556	0.172713
1.35	0.489359	0.293705	0.170375
1.36	0.484928	0.279435	0.16605
1.37	0.46226	0.255985	0.136064
1.38	0.419642	0.256725	0.170706
1.39	0.452061	0.269218	0.166164
1.4	0.460074	0.267372	0.172864
1.41	0.477639	0.245827	0.181104
1.42	0.508291	0.264969	0.210676
1.43	0.43848	0.279193	0.219621
1.44	0.444109	0.314567	0.262005
1.45	0.485508	0.303671	0.287595
1.46	0.476978	0.278442	0.307749
1.47	0.430753	0.269038	0.306148
1.48	0.422584	0.267612	0.306603
1.49	0.414414	0.266552	0.26446
1.5	0.425465	0.270324	0.261603
1.51	0.409698	0.302955	0.254314
1.52	0.463625	0.297804	0.303923
1.53	0.409523	0.304392	0.283167
1.54	0.409393	0.288682	0.251489
1.55	0.408295	0.278996	0.251361
1.56	0.447479	0.326273	0.290519
1.57	0.474293	0.346298	0.262828
1.58	0.466699	0.345617	0.256355
1.59	0.450171	0.314311	0.252109
1.6	0.515788	0.339991	0.25673
1.61	0.525567	0.326738	0.229184
1.62	0.514443	0.316847	0.226468
1.63	0.492743	0.291118	0.241193
1.64	0.476152	0.283983	0.232317
1.65	0.539388	0.294349	0.221557
1.66	0.538551	0.302216	0.223175
1.67	0.49098	0.363616	0.226755
1.68	0.513438	0.317169	0.227667
1.69	0.467746	0.341802	0.205569
1.7	0.505209	0.367863	0.192745
1.71	0.52845	0.383643	0.212942
1.72	0.546539	0.362223	0.213373
1.73	0.492832	0.382809	0.201206
1.74	0.536928	0.365155	0.206028
1.75	0.556868	0.338255	0.231211
1.76	0.553483	0.339598	0.230447
1.77	0.534746	0.359627	0.242226
1.78	0.51846	0.364906	0.2166
1.79	0.572562	0.377871	0.202925
1.8	0.578456	0.355527	0.201995
1.81	0.551326	0.34737	0.235552
1.82	0.547231	0.363703	0.253325
1.83	0.544777	0.319671	0.246977
1.84	0.596085	0.333975	0.215064
1.85	0.624921	0.315588	0.24431
1.86	0.603554	0.338619	0.253317
1.87	0.516694	0.351461	0.211399
1.88	0.479009	0.343337	0.227468
1.89	0.432665	0.335109	0.223422
1.9	0.462385	0.280721	0.219184
1.91	0.524543	0.337599	0.239041
1.92	0.555188	0.35621	0.222524
1.93	0.581553	0.386358	0.220326
1.94	0.592597	0.326059	0.205925
1.95	0.531118	0.281716	0.206326
1.96	0.529872	0.281223	0.219108
1.97	0.519489	0.262241	0.230038
1.98	0.522583	0.225842	0.227423
1.99	0.554518	0.243168	0.271006
2	0.526654	0.18147	0.233312
2.01	0.579948	0.226132	0.231133
2.02	0.591511	0.257239	0.257223
2.03	0.592241	0.223518	0.276138
2.04	0.59767	0.223283	0.262368
2.05	0.58968	0.201912	0.229208
2.06	0.603642	0.240924	0.22698
2.07	0.494304	0.231801	0.216646
2.08	0.517825	0.212334	0.224594
2.09	0.547954	0.242055	0.207535
2.1	0.508258	0.272235	0.229002
2.11	0.557182	0.23289	0.24638
2.12	0.585167	0.204427	0.235734
2.13	0.614082	0.17314	0.243336
2.14	0.547553	0.18662	0.228077
2.15	0.515704	0.194203	0.257795
2.16	0.540065	0.210885	0.283005
2.17	0.527341	0.278192	0.283908
2.18	0.528824	0.31951	0.290017
2.19	0.589612	0.30545	0.286591
2.2	0.555528	0.300535	0.293534
2.21	0.531748	0.278197	0.274374
2.22	0.519492	0.260006	0.265571
2.23	0.574536	0.243562	0.255373
2.24	0.597119	0.261261	0.25518
2.25	0.559868	0.317523	0.273197
2.26	0.586761	0.323973	0.238626
2.27	0.55948	0.364324	0.256416
2.28	0.535373	0.39503	0.262796
2.29	0.542478	0.360698	0.218945
2.3	0.554027	0.376136	0.233322
2.31	0.581406	0.370747	0.247653
2.32	0.483574	0.369853	0.235122
2.33	0.519761	0.327441	0.249544
2.34	0.466427	0.335381	0.253358
2.35	0.469975	0.333597	0.228403
2.36	0.490389	0.333216	0.258068
2.37	0.457696	0.34488	0.263774
2.38	0.447776	0.377241	0.235541
2.39	0.431488	0.404623	0.25989
2.4	0.437561	0.355273	0.265243
2.41	0.421472	0.367697	0.272398
2.42	0.415622	0.376777	0.255994
2.43	0.460795	0.366132	0.251047
2.44	0.488804	0.367684	0.265284
2.45	0.453608	0.369298	0.258375
2.46	0.485402	0.362741	0.270024
2.47	0.488013	0.346961	0.286055
2.48	0.476307	0.356492	0.275173
2.49	0.484962	0.372856	0.261643
2.5	0.482792	0.317157	0.248985
2.51	0.46546	0.337918	0.233871
2.52	0.486082	0.365994	0.245195
2.53	0.476386	0.32016	0.223789
2.54	0.513834	0.328323	0.269608
2.55	0.476514	0.39338	0.261085
2.56	0.442738	0.38231	0.248849
2.57	0.44754	0.369542	0.277766
2.58	0.454826	0.305235	0.283665
2.59	0.469041	0.327869	0.268797
2.6	0.438325	0.290278	0.255324
2.61	0.459999	0.349966	0.250843
2.62	0.403819	0.341349	0.268446
2.63	0.417798	0.323651	0.288022
2.64	0.455736	0.311866	0.306912
2.65	0.490738	0.303572	0.270691
2.66	0.457161	0.336708	0.277973
2.67	0.502802	0.295225	0.283661
2.68	0.505583	0.305787	0.266496
2.69	0.54144	0.342357	0.270975
2.7	0.4943	0.261914	0.26792
2.71	0.49971	0.339555	0.275777
2.72	0.517207	0.348437	0.279159
2.73	0.480391	0.329944	0.288404
2.74	0.45939	0.337687	0.301293
2.75	0.457231	0.308653	0.273999
2.76	0.45158	0.296185	0.298693
2.77	0.397777	0.361194	0.335512
2.78	0.368049	0.395391	0.334534
2.79	0.373318	0.382274	0.321675
2.8	0.381577	0.368206	0.337145
2.81	0.381097	0.371401	0.314143
2.82	0.34876	0.34073	0.343368
2.83	0.359089	0.332243	0.302303
2.84	0.389402	0.315833	0.338613
2.85	0.397099	0.316792	0.352911
2.86	0.404089	0.31122	0.364045
2.87	0.401391	0.316053	0.325083
2.88	0.436911	0.309112	0.350843
2.89	0.423351	0.367612	0.362469
2.9	0.435386	0.376506	0.379215
2.91	0.359075	0.398288	0.376695
2.92	0.407768	0.366771	0.410355
2.93	0.428553	0.333771	0.414432
2.94	0.422557	0.384499	0.397989
2.95	0.428456	0.361362	0.372248
2.96	0.415493	0.355736	0.411797
2.97	0.414109	0.38862	0.386436
2.98	0.417128	0.385627	0.431641
2.99	0.452563	0.344577	0.413808
3	0.494567	0.301968	0.397894
3.01	0.485733	0.296569	0.41554
3.02	0.492935	0.269367	0.374461
3.03	0.508472	0.265074	0.380222
3.04	0.526198	0.296953	0.401198
3.05	0.483575	0.292029	0.375581
3.06	0.498367	0.257435	0.366332
3.07	0.5023	0.267623	0.345911
3.08	0.489904	0.258879	0.302041
3.09	0.483265	0.270102	0.359335
3.1	0.473862	0.312933	0.328905
3.11	0.480749	0.259902	0.331332
3.12	0.49602	0.294431	0.323257
3.13	0.485778	0.301719	0.338659
3.14	0.484985	0.289187	0.348986
3.15	0.447792	0.321285	0.341368
3.16	0.425252	0.324593	0.36488
3.17	0.435304	0.298588	0.348203
3.18	0.433274	0.324974	0.345
3.19	0.410358	0.337411	0.380632
3.2	0.440508	0.315038	0.322549
3.21	0.424168	0.298453	0.33582
3.22	0.471806	0.323832	0.320688
3.23	0.527335	0.325791	0.34147
3.24	0.43127	0.32663	0.347892
3.25	0.436587	0.30208	0.323693
3.26	0.404723	0.330258	0.32105
3.27	0.404811	0.344192	0.325348
3.28	0.432738	0.334824	0.382543
3.29	0.44674	0.341908	0.389721
3.3	0.386035	0.299215	0.405992
3.31	0.420811	0.313316	0.388087
3.32	0.373944	0.311466	0.421494
3.33	0.386656	0.343608	0.445579
3.34	0.409734	0.330125	0.464084
3.35	0.453574	0.335357	0.417045
3.36	0.448486	0.335646	0.395282
3.37	0.414224	0.330691	0.414111
3.38	0.428967	0.305725	0.434048
3.39	0.41468	0.309227	0.388766
3.4	0.402912	0.291938	0.435484
3.41	0.437582	0.316993	0.434604
3.42	0.439958	0.281479	0.456887
3.43	0.416677	0.279596	0.416566
3.44	0.46416	0.277366	0.40469
3.45	0.412286	0.320908	0.401269
3.46	0.420431	0.318986	0.412805
3.47	0.427769	0.343579	0.397106
3.48	0.429346	0.34008	0.37336
3.49	0.451932	0.338956	0.38508
3.5	0.49521	0.366733	0.341329
3.51	0.498878	0.395032	0.323373
3.52	0.46	0.400475	0.349151
3.53	0.474429	0.365484	0.346301
3.54	0.462058	0.331936	0.351981
3.55	0.475146	0.318905	0.396133
3.56	0.477107	0.332492	0.388055
3.57	0.49718	0.350961	0.392617
3.58	0.539757	0.356544	0.361721
3.59	0.537638	0.382584	0.327671
3.6	0.526863	0.432157	0.331894
3.61	0.530277	0.424437	0.341174
3.62	0.526008	0.520957	0.364126
3.63	0.557133	0.468002	0.356797
3.64	0.565583	0.497854	0.385499
3.65	0.550976	0.482063	0.377715
3.66	0.541347	0.469299	0.406303
3.67	0.527252	0.480513	0.380047
3.68	0.535973	0.447187	0.400157
3.69	0.566776	0.425477	0.426161
3.7	0.536966	0.473647	0.453545
3.71	0.512279	0.519255	0.459368
3.72	0.49315	0.556172	0.454936
3.73	0.501678	0.564871	0.449329
3.74	0.515966	0.583125	0.450513
3.75	0.523081	0.584196	0.425031
3.76	0.570701	0.482781	0.386998
3.77	0.525353	0.574744	0.413396
3.78	0.532453	0.544195	0.436072
3.79	0.546725	0.549392	0.437321
3.8	0.576004	0.510789	0.468571
3.81	0.588913	0.496364	0.466742
3.82	0.532284	0.494943	0.490075
3.83	0.511364	0.488423	0.44461
3.84	0.522688	0.542333	0.458906
3.85	0.495933	0.492949	0.444664
3.86	0.530509	0.498402	0.457064
3.87	0.553336	0.54488	0.399136
3.88	0.530839	0.541844	0.393688
3.89	0.518826	0.544141	0.387129
3.9	0.54226	0.639952	0.387495
3.91	0.507901	0.694817	0.454208
3.92	0.518697	0.697401	0.448471
3.93	0.542212	0.653993	0.462862
3.94	0.486889	0.630315	0.484919
3.95	0.576604	0.636785	0.464835
3.96	0.572624	0.644695	0.479494
3.97	0.580288	0.681472	0.471616
3.98	0.597186	0.69975	0.47836
3.99	0.616036	0.619525	0.442102
4	0.598508	0.580577	0.468713
4.01	0.602505	0.55662	0.443613
4.02	0.581741	0.531408	0.45995
4.03	0.585071	0.534342	0.446727
4.04	0.570421	0.566596	0.424674
4.05	0.559242	0.5318	0.429931
4.06	0.574923	0.558172	0.44258
4.07	0.558359	0.581329	0.406249
4.08	0.54504	0.64869	0.472207
4.09	0.533328	0.61007	0.471573
4.1	0.504408	0.622167	0.463478
4.11	0.509698	0.664847	0.414988
4.12	0.517517	0.654949	0.418893
4.13	0.5117	0.647164	0.40794
4.14	0.501821	0.668456	0.410887
4.15	0.537918	0.566658	0.402209
4.16	0.511774	0.611566	0.427429
4.17	0.538945	0.650296	0.421689
4.18	0.495507	0.603309	0.432045
4.19	0.539865	0.665436	0.450885
4.2	0.552012	0.644926	0.459429
4.21	0.52068	0.575377	0.473257
4.22	0.534098	0.57627	0.487122
4.23	0.477717	0.5301	0.506044
4.24	0.513257	0.492081	0.503783
4.25	0.500704	0.511004	0.452243
4.26	0.540491	0.537462	0.439713
4.27	0.563723	0.563458	0.488717
4.28	0.553497	0.537675	0.471447
4.29	0.512148	0.503566	0.4543
4.3	0.547214	0.498903	0.466122
4.31	0.519797	0.520579	0.47547
4.32	0.47793	0.555821	0.482137
4.33	0.461023	0.478934	0.485472
4.34	0.498568	0.574454	0.470889
4.35	0.460905	0.578977	0.485955
4.36	0.464087	0.593207	0.464844
4.37	0.469159	0.587039	0.461466
4.38	0.486165	0.573759	0.490402
4.39	0.528186	0.539485	0.434954
4.4	0.501581	0.576216	0.415906
4.41	0.500611	0.631438	0.40888
4.42	0.507519	0.65422	0.442144
4.43	0.505118	0.657513	0.433999
4.44	0.51692	0.652553	0.439248
4.45	0.50177	0.631005	0.461168
4.46	0.494559	0.679952	0.449173
4.47	0.480535	0.663106	0.438173
4.48	0.49639	0.658134	0.475355
4.49	0.471925	0.644246	0.443222
4.5	0.466103	0.583256	0.464693
4.51	0.452172	0.550319	0.494154
4.52	0.459127	0.624668	0.484689
4.53	0.491366	0.624184	0.494774
4.54	0.504096	0.639321	0.544116
4.55	0.457445	0.665242	0.487288
4.56	0.484149	0.706789	0.480286
4.57	0.507934	0.681746	0.521547
4.58	0.462138	0.676065	0.508327
4.59	0.468446	0.616725	0.504704
4.6	0.414867	0.65561	0.532011
4.61	0.413268	0.613896	0.518879
4.62	0.413511	0.598315	0.462957
4.63	0.44325	0.53222	0.507787
4.64	0.430274	0.594596	0.479806
4.65	0.436832	0.587582	0.516131
4.66	0.453448	0.63455	0.502529
4.67	0.400822	0.597441	0.522889
4.68	0.428458	0.657741	0.498314
4.69	0.430982	0.583254	0.532706
4.7	0.418582	0.606039	0.531639
4.71	0.418635	0.565764	0.569229
4.72	0.447111	0.570071	0.545477
4.73	0.419179	0.619186	0.545126
4.74	0.481818	0.65326	0.561737
4.75	0.501549	0.663403	0.571113
4.76	0.484786	0.671943	0.573359
4.77	0.461515	0.645367	0.566044
4.78	0.473563	0.649568	0.584942
4.79	0.438781	0.667661	0.553807
4.8	0.442172	0.67136	0.528853
4.81	0.449039	0.595292	0.548636
4.82	0.44771	0.612963	0.531854
4.83	0.486181	0.60033	0.541329
4.84	0.475547	0.645318	0.517772
4.85	0.499574	0.669254	0.520893
4.86	0.517808	0.642882	0.565833
4.87	0.505084	0.590613	0.542115
4.88	0.49735	0.585013	0.540116
4.89	0.525291	0.606501	0.554034
4.9	0.522857	0.623119	0.537822
4.91	0.555198	0.643566	0.539724
4.92	0.523867	0.63521	0.506806
4.93	0.520575	0.647095	0.482691
4.94	0.515856	0.649514	0.422811
4.95	0.560184	0.623096	0.467103
4.96	0.541593	0.613488	0.445814
4.97	0.540181	0.572161	0.486048
4.98	0.564312	0.61301	0.48517
4.99	0.559536	0.608698	0.499904
5	0.554911	0.589461	0.472373
5.01	0.508966	0.584807	0.449656
5.02	0.547739	0.595665	0.501942
5.03	0.552633	0.603233	0.508425
5.04	0.545047	0.606128	0.515662
5.05	0.545761	0.59548	0.491512
5.06	0.558384	0.570055	0.485457
5.07	0.533316	0.63638	0.50553
5.08	0.531694	0.645135	0.50924
5.09	0.543986	0.632161	0.528567
5.1	0.550057	0.622207	0.529381
5.11	0.524573	0.616016	0.503437
5.12	0.534548	0.625214	0.476097
5.13	0.545804	0.632483	0.465109
5.14	0.521437	0.685391	0.488479
5.15	0.548965	0.680187	0.466848
5.16	0.54315	0.607976	0.434158
5.17	0.55451	0.627264	0.44529
5.18	0.536438	0.641743	0.46043
5.19	0.557206	0.683054	0.44022
5.2	0.536431	0.672321	0.433546
5.21	0.564565	0.657354	0.422147
5.22	0.570205	0.667542	0.467378
5.23	0.614015	0.67454	0.510381
5.24	0.602329	0.645345	0.492727
5.25	0.600319	0.610132	0.472157
5.26	0.580411	0.625056	0.471885
5.27	0.568171	0.614602	0.491357
5.28	0.558221	0.605761	0.483747
5.29	0.566398	0.65579	0.522663
5.3	0.539706	0.633555	0.496426
5.31	0.515332	0.5884	0.509487
5.32	0.54503	0.60189	0.520224
5.33	0.532284	0.596557	0.547525
5.34	0.553997	0.570575	0.519023
5.35	0.522253	0.568725	0.50654
5.36	0.533549	0.585259	0.500739
5.37	0.538013	0.614057	0.48887
5.38	0.526363	0.575037	0.508252
5.39	0.52667	0.629481	0.522716
5.4	0.536001	0.583451	0.473008
5.41	0.531029	0.552694	0.501921
5.42	0.56323	0.547637	0.5029
5.43	0.5266	0.545947	0.491354
5.44	0.511989	0.588539	0.505135
5.45	0.536502	0.612086	0.538638
5.46	0.518666	0.579875	0.516099
5.47	0.571749	0.584844	0.46571
5.48	0.521178	0.57267	0.468916
5.49	0.514447	0.555835	0.477845
5.5	0.520233	0.553963	0.47834
5.51	0.512537	0.574392	0.470772
5.52	0.52247	0.569361	0.4942
5.53	0.550093	0.569167	0.489573
5.54	0.545489	0.583216	0.491713
5.55	0.558323	0.535731	0.516583
5.56	0.551852	0.522928	0.528778
5.57	0.519403	0.525673	0.549859
5.58	0.519762	0.499752	0.545833
5.59	0.544416	0.522731	0.512403
5.6	0.532973	0.512273	0.506191
5.61	0.531539	0.488114	0.599803
5.62	0.545489	0.502205	0.568387
5.63	0.557257	0.521829	0.528177
5.64	0.538416	0.527845	0.500853
5.65	0.54463	0.520937	0.52015
5.66	0.554427	0.499755	0.530168
5.67	0.555864	0.454655	0.500548
5.68	0.568607	0.443227	0.523867
5.69	0.570819	0.484911	0.548022
5.7	0.567302	0.45532	0.565509
5.71	0.584922	0.490258	0.557923
5.72	0.566561	0.526722	0.538343
5.73	0.562645	0.519083	0.520695
5.74	0.541193	0.565556	0.492331
5.75	0.586625	0.532084	0.499639
5.76	0.556039	0.574269	0.515514
5.77	0.532802	0.564298	0.530187
5.78	0.574985	0.562862	0.575822
5.79	0.547679	0.605067	0.535698
5.8	0.560318	0.568003	0.530595
5.81	0.567573	0.537085	0.497784
5.82	0.571073	0.550446	0.479532
5.83	0.605775	0.553117	0.458297
5.84	0.618557	0.565706	0.475561
5.85	0.62231	0.57867	0.459431
5.86	0.606427	0.596035	0.426556
5.87	0.573262	0.551628	0.453345
5.88	0.574634	0.596869	0.42958
5.89	0.604198	0.552684	0.425489
5.9	0.607513	0.5705	0.448763
5.91	0.632041	0.582077	0.447551
5.92	0.612073	0.559874	0.416511
5.93	0.588326	0.577373	0.437478
5.94	0.607551	0.568369	0.396556
5.95	0.580509	0.64993	0.412291
5.96	0.535284	0.642639	0.394347
5.97	0.567821	0.64568	0.420429
5.98	0.56913	0.634563	0.427971
5.99	0.599228	0.647515	0.438743
6	0.604036	0.59738	0.423999
6.01	0.590678	0.539732	0.456475
6.02	0.59695	0.576382	0.436053
6.03	0.598108	0.646492	0.399032
6.04	0.553527	0.592085	0.426223
6.05	0.546851	0.593323	0.43441
6.06	0.546448	0.594557	0.456731
6.07	0.591771	0.563957	0.417339
6.08	0.608551	0.601466	0.41529
6.09	0.629196	0.581206	0.423238
6.1	0.603348	0.657608	0.408993
6.11	0.593037	0.588614	0.451464
6.12	0.634781	0.514656	0.468858
6.13	0.613784	0.500536	0.451422
6.14	0.604222	0.53206	0.45065
6.15	0.591334	0.526697	0.435684
6.16	0.623628	0.485405	0.422791
6.17	0.626637	0.48952	0.420164
6.18	0.63192	0.476673	0.409332
6.19	0.63954	0.483376	0.421628
6.2	0.624695	0.496807	0.444672
6.21	0.617701	0.524448	0.43044
6.22	0.637743	0.45828	0.43624
6.23	0.63932	0.469042	0.457856
6.24	0.658108	0.5	0.432893
6.25	0.67136	0.444124	0.409803
6.26	0.661851	0.422171	0.427428
6.27	0.65076	0.410259	0.419627
6.28	0.652128	0.378868	0.446121
6.29	0.653874	0.401228	0.397877
6.3	0.639186	0.442245	0.365586
6.31	0.633122	0.432284	0.378253
6.32	0.62527	0.401334	0.377023
6.33	0.624212	0.413401	0.386402
6.34	0.641383	0.394481	0.359334
6.35	0.655522	0.397706	0.361658
6.36	0.66321	0.373557	0.37492
6.37	0.657244	0.386588	0.37626
6.38	0.652322	0.383247	0.395067
6.39	0.66504	0.341182	0.364946
6.4	0.683019	0.339484	0.368781
6.41	0.672444	0.397282	0.380312
6.42	0.657007	0.429447	0.391123
6.43	0.678599	0.430599	0.387912
6.44	0.693629	0.403139	0.40618
6.45	0.641047	0.389919	0.414368
6.46	0.639619	0.425772	0.393404
6.47	0.635738	0.452362	0.41306
6.48	0.630023	0.47706	0.403079
6.49	0.632467	0.459433	0.401434
6.5	0.656981	0.465374	0.450362
6.51	0.684067	0.446752	0.426347
6.52	0.691679	0.489404	0.397953
6.53	0.668038	0.518725	0.371833
6.54	0.690999	0.512664	0.372248
6.55	0.689452	0.496357	0.364771
6.56	0.696709	0.513299	0.412683
6.57	0.685518	0.550324	0.429917
6.58	0.670969	0.54409	0.395335
6.59	0.665787	0.525017	0.439299
6.6	0.675466	0.490063	0.451975
6.61	0.677198	0.476885	0.44121
6.62	0.679925	0.473787	0.459703
6.63	0.681819	0.489285	0.443543
6.64	0.688277	0.492067	0.463973
6.65	0.693808	0.490316	0.519996
6.66	0.684762	0.476576	0.473154
6.67	0.672222	0.476254	0.503354
6.68	0.691688	0.446228	0.461548
6.69	0.687052	0.495252	0.456997
6.7	0.683349	0.48011	0.449788
6.71	0.690731	0.469302	0.470088
6.72	0.69351	0.456549	0.391925
6.73	0.694152	0.495822	0.403091
6.74	0.68735	0.525591	0.437626
6.75	0.66011	0.544492	0.462167
6.76	0.680083	0.573798	0.477146
6.77	0.695656	0.621667	0.464651
6.78	0.72694	0.62475	0.477607
6.79	0.713814	0.613504	0.514693
6.8	0.682892	0.612304	0.512071
6.81	0.693381	0.563668	0.475953
6.82	0.704209	0.558069	0.497439
6.83	0.679169	0.563883	0.531449
6.84	0.709615	0.536382	0.476036
6.85	0.673096	0.577345	0.495891
6.86	0.662265	0.580412	0.472345
6.87	0.694933	0.579293	0.490082
6.88	0.665089	0.522025	0.494005
6.89	0.679937	0.456164	0.47678
6.9	0.703465	0.512599	0.477025
6.91	0.707186	0.517619	0.488826
6.92	0.709717	0.460692	0.463871
6.93	0.705366	0.477436	0.478438
6.94	0.72725	0.518607	0.49782
6.95	0.673913	0.538959	0.505092
6.96	0.67666	0.520378	0.484399
6.97	0.710233	0.527483	0.479488
6.98	0.683259	0.501826	0.534351
6.99	0.664491	0.538016	0.499685
7	0.696764	0.507962	0.507224
7.01	0.685355	0.521935	0.517799
7.02	0.681605	0.528904	0.560691
7.03	0.708518	0.486266	0.532019
7.04	0.707697	0.496209	0.501447
7.05	0.669128	0.480539	0.5109
7.06	0.657937	0.462078	0.536807
7.07	0.679795	0.476767	0.508318
7.08	0.658459	0.531219	0.494127
7.09	0.647752	0.517564	0.511301
7.1	0.652799	0.528913	0.484574
7.11	0.633874	0.559685	0.493614
7.12	0.633741	0.505541	0.501578
7.13	0.664667	0.493102	0.500888
7.14	0.658171	0.508273	0.474278
7.15	0.632392	0.528979	0.463282
7.16	0.691384	0.53385	0.48022
7.17	0.697669	0.51937	0.474001
7.18	0.706628	0.489219	0.460865
7.19	0.710679	0.464185	0.471413
7.2	0.725128	0.47079	0.473998
7.21	0.667734	0.527711	0.49694
7.22	0.662735	0.481962	0.493855
7.23	0.694426	0.451808	0.448946
7.24	0.723112	0.438715	0.445824
7.25	0.708207	0.443484	0.463425
7.26	0.69185	0.451046	0.516385
7.27	0.697817	0.493073	0.495759
7.28	0.710978	0.510647	0.445606
7.29	0.694922	0.478431	0.441433
7.3	0.733338	0.452069	0.426036
7.31	0.7131	0.502151	0.449211
7.32	0.715885	0.532384	0.448051
7.33	0.713552	0.566288	0.442629
7.34	0.692112	0.534876	0.443144
7.35	0.728706	0.536366	0.463976
7.36	0.681422	0.52298	0.438426
7.37	0.68821	0.517989	0.468086
7.38	0.687632	0.520565	0.428759
7.39	0.716891	0.474046	0.484314
7.4	0.722266	0.516548	0.452365
7.41	0.717372	0.522492	0.460397
7.42	0.693882	0.491632	0.453888
7.43	0.694002	0.504567	0.412853
7.44	0.690145	0.493465	0.422949
7.45	0.718356	0.504534	0.450599
7.46	0.729312	0.580668	0.428755
7.47	0.735363	0.556768	0.446274
7.48	0.689948	0.555594	0.43238
7.49	0.732985	0.544048	0.451429
7.5	0.714579	0.532162	0.477092
7.51	0.700989	0.537171	0.500241
7.52	0.726074	0.538099	0.484565
7.53	0.700174	0.505153	0.518474
7.54	0.740353	0.545647	0.53296
7.55	0.739749	0.512555	0.50551
7.56	0.690056	0.568518	0.52684
7.57	0.710627	0.566057	0.546825
7.58	0.69468	0.523184	0.520474
7.59	0.696533	0.506057	0.504459
7.6	0.699953	0.479709	0.51658
7.61	0.684761	0.511626	0.550683
7.62	0.719524	0.526695	0.523156
7.63	0.713006	0.575172	0.520494
7.64	0.710023	0.529023	0.523842
7.65	0.715269	0.530574	0.496157
7.66	0.696081	0.57038	0.492202
7.67	0.682581	0.567322	0.508515
7.68	0.687882	0.578082	0.514576
7.69	0.708277	0.567569	0.514624
7.7	0.71886	0.566352	0.531511
7.71	0.738284	0.592889	0.546938
7.72	0.743947	0.587929	0.503486
7.73	0.726431	0.636103	0.503535
7.74	0.688368	0.613285	0.503772
7.75	0.698851	0.620363	0.520848
7.76	0.697134	0.621448	0.49559
7.77	0.693708	0.629394	0.532165
7.78	0.687067	0.630707	0.514656
7.79	0.669973	0.611233	0.521184
7.8	0.707446	0.583968	0.559032
7.81	0.747897	0.604742	0.549679
7.82	0.695997	0.587646	0.553917
7.83	0.710817	0.595952	0.52302
7.84	0.691783	0.580427	0.513512
7.85	0.720681	0.552208	0.515738
7.86	0.72965	0.553826	0.477105
7.87	0.716621	0.561772	0.453899
7.88	0.754158	0.585063	0.47277
7.89	0.698161	0.561631	0.469446
7.9	0.700011	0.570847	0.474337
7.91	0.753488	0.582022	0.467784
7.92	0.70117	0.56882	0.472488
7.93	0.683761	0.573276	0.47118
7.94	0.703305	0.550596	0.489717
7.95	0.698424	0.599983	0.503312
7.96	0.698899	0.57022	0.482271
7.97	0.709527	0.598739	0.496782
7.98	0.682364	0.579316	0.488003
7.99	0.667928	0.557336	0.501608
8	0.735839	0.548853	0.507775
8.01	0.686381	0.529529	0.516193
8.02	0.711603	0.534161	0.512012
8.03	0.670905	0.575445	0.484261
8.04	0.679946	0.545071	0.494472
8.05	0.694339	0.537309	0.468062
8.06	0.697746	0.518757	0.470548
8.07	0.695253	0.53715	0.47754
8.08	0.695055	0.524644	0.481669
8.09	0.717666	0.585181	0.448552
8.1	0.722032	0.565096	0.426237
8.11	0.711567	0.639908	0.434514
8.12	0.736526	0.627818	0.422615
8.13	0.744424	0.647702	0.405467
8.14	0.722147	0.599613	0.426769
8.15	0.729507	0.614351	0.418612
8.16	0.685266	0.628882	0.395139
8.17	0.713941	0.599106	0.398526
8.18	0.707077	0.601633	0.422832
8.19	0.677549	0.589484	0.407767
8.2	0.670891	0.605116	0.423905
8.21	0.677868	0.600466	0.471145
8.22	0.701279	0.621872	0.457959
8.23	0.701969	0.638732	0.447651
8.24	0.709795	0.645737	0.421771
8.25	0.689003	0.645752	0.41971
8.26	0.713476	0.614235	0.410397
8.27	0.68646	0.629733	0.441376
8.28	0.700321	0.596972	0.489039
8.29	0.705768	0.624944	0.485137
8.3	0.67818	0.650776	0.47339
8.31	0.70225	0.664431	0.482737
8.32	0.673138	0.619852	0.449103
8.33	0.659349	0.598175	0.443882
8.34	0.664251	0.605217	0.458898
8.35	0.670258	0.640865	0.49047
8.36	0.666921	0.67276	0.456346
8.37	0.690175	0.647442	0.434517
8.38	0.680808	0.671513	0.462483
8.39	0.680425	0.699209	0.442836
8.4	0.660096	0.683083	0.440178
8.41	0.652305	0.69133	0.411887
8.42	0.658687	0.690753	0.421313
8.43	0.658998	0.676944	0.431826
8.44	0.667681	0.705582	0.421666
8.45	0.676424	0.644144	0.424463
8.46	0.693112	0.644598	0.43302
8.47	0.663102	0.626568	0.415591
8.48	0.645347	0.636755	0.410894
8.49	0.703115	0.612821	0.432586
8.5	0.688523	0.675373	0.410635
8.51	0.669942	0.686637	0.448164
8.52	0.684964	0.649717	0.420281
8.53	0.693947	0.689371	0.418048
8.54	0.680827	0.685346	0.395712
8.55	0.687723	0.682932	0.420106
8.56	0.693532	0.69528	0.438649
8.57	0.656195	0.678496	0.393021
8.58	0.646326	0.706086	0.418085
8.59	0.618817	0.644714	0.396144
8.6	0.642521	0.665443	0.400572
8.61	0.63516	0.678089	0.453734
8.62	0.648358	0.665708	0.479047
8.63	0.676042	0.621294	0.500671
8.64	0.692142	0.62133	0.483886
8.65	0.701262	0.624517	0.551637
8.66	0.689871	0.644017	0.579506
8.67	0.680395	0.620996	0.520001
8.68	0.663319	0.592489	0.535339
8.69	0.706331	0.648414	0.500594
8.7	0.675306	0.604072	0.557612
8.71	0.736358	0.619196	0.58127
8.72	0.726158	0.625329	0.546551
8.73	0.700372	0.618011	0.539266
8.74	0.664305	0.650502	0.542531
8.75	0.65763	0.656676	0.527117
8.76	0.694031	0.651499	0.512884
8.77	0.664886	0.627765	0.513569
8.78	0.65508	0.593891	0.511356
8.79	0.646017	0.606234	0.516115
8.8	0.663121	0.584973	0.487757
8.81	0.669296	0.554002	0.503004
8.82	0.662494	0.562841	0.509782
8.83	0.642916	0.547498	0.48731
8.84	0.644247	0.581613	0.510965
8.85	0.602741	0.618399	0.525953
8.86	0.597401	0.627451	0.511845
8.87	0.604853	0.636969	0.54061
8.88	0.58855	0.59603	0.536964
8.89	0.604338	0.611662	0.512439
8.9	0.613761	0.6567	0.543612
8.91	0.61508	0.643902	0.547345
8.92	0.625136	0.588136	0.512788
8.93	0.632137	0.601285	0.520324
8.94	0.635903	0.62227	0.521745
8.95	0.625479	0.628454	0.541149
8.96	0.66017	0.669369	0.535344
8.97	0.629072	0.645111	0.540164
8.98	0.643037	0.659441	0.554979
8.99	0.649604	0.659067	0.511016
9	0.658227	0.649114	0.508245
9.01	0.65785	0.61025	0.555638
9.02	0.60694	0.633655	0.556315
9.03	0.636984	0.60235	0.544259
9.04	0.622941	0.607784	0.559414
9.05	0.603967	0.604371	0.561149
9.06	0.609818	0.607854	0.579783
9.07	0.597712	0.585734	0.566329
9.08	0.586287	0.567223	0.52547
9.09	0.626188	0.554763	0.541458
9.1	0.667593	0.52812	0.547689
9.11	0.662882	0.544913	0.52717
9.12	0.651357	0.570998	0.500671
9.13	0.639515	0.546983	0.474106
9.14	0.652605	0.606997	0.484931
9.15	0.639198	0.569847	0.4665
9.16	0.669501	0.56277	0.448752
9.17	0.720518	0.582579	0.489049
9.18	0.671196	0.588112	0.472626
9.19	0.629362	0.54708	0.488534
9.2	0.639671	0.597917	0.501817
9.21	0.614265	0.571269	0.487423
9.22	0.635076	0.593248	0.476127
9.23	0.643244	0.575958	0.508081
9.24	0.642398	0.543795	0.542111
9.25	0.662914	0.586066	0.501576
9.26	0.645628	0.591871	0.520838
9.27	0.634803	0.60571	0.520145
9.28	0.644788	0.639767	0.505141
9.29	0.671684	0.651468	0.531468
9.3	0.684381	0.637949	0.516728
9.31	0.702683	0.642547	0.540331
9.32	0.683961	0.603609	0.532031
9.33	0.746366	0.638402	0.523474
9.34	0.70964	0.615298	0.533583
9.35	0.747014	0.580251	0.509587
9.36	0.728591	0.657801	0.516722
9.37	0.685611	0.6214	0.503215
9.38	0.695523	0.603953	0.50525
9.39	0.688242	0.654802	0.507947
9.4	0.660863	0.649195	0.501785
9.41	0.662208	0.617589	0.543955
9.42	0.681308	0.598665	0.547204
9.43	0.676998	0.565959	0.538991
9.44	0.678734	0.544942	0.508879
9.45	0.694365	0.59049	0.485137
9.46	0.658851	0.568414	0.473362
9.47	0.681423	0.551561	0.499091
9.48	0.66106	0.522536	0.476943
9.49	0.649186	0.522188	0.508333
9.5	0.620271	0.537258	0.506403
9.51	0.636805	0.530542	0.506585
9.52	0.596008	0.510509	0.482259
9.53	0.608105	0.518587	0.490961
9.54	0.579436	0.533577	0.496805
9.55	0.625176	0.513812	0.516509
9.56	0.656146	0.516781	0.540995
9.57	0.652705	0.52235	0.534102
9.58	0.669304	0.576179	0.488778
9.59	0.687104	0.541348	0.450547
9.6	0.704234	0.534685	0.4552
9.61	0.694466	0.476648	0.467275
9.62	0.711918	0.500705	0.514887
9.63	0.744571	0.522879	0.495415
9.64	0.702468	0.5281	0.47016
9.65	0.685955	0.514252	0.500512
9.66	0.707031	0.513247	0.510523
9.67	0.710769	0.507095	0.519194
9.68	0.677259	0.542027	0.547813
9.69	0.668782	0.545433	0.492966
9.7	0.681707	0.534502	0.54645
9.71	0.657765	0.517332	0.537085
9.72	0.649108	0.544606	0.524574
9.73	0.670896	0.573232	0.504562
9.74	0.679049	0.515357	0.503746
9.75	0.681386	0.568144	0.481481
9.76	0.649704	0.59804	0.478991
9.77	0.627527	0.568885	0.515269
9.78	0.63399	0.55473	0.516876
9.79	0.639793	0.575343	0.538314
9.8	0.635745	0.551834	0.516419
9.81	0.634773	0.570982	0.512125
9.82	0.627144	0.578887	0.533166
9.83	0.64179	0.588627	0.555168
9.84	0.65398	0.583706	0.524147
9.85	0.647957	0.589355	0.531673
9.86	0.668997	0.620475	0.520321
9.87	0.645341	0.602804	0.544201
9.88	0.638933	0.57946	0.513636
9.89	0.61403	0.591868	0.559785
9.9	0.615408	0.586922	0.573401
9.91	0.618663	0.585531	0.556838
9.92	0.627025	0.57799	0.575489
9.93	0.631939	0.554536	0.557261
9.94	0.61079	0.568434	0.550939
9.95	0.656652	0.55172	0.516633
9.96	0.637904	0.520787	0.520383
9.97	0.666019	0.553079	0.503506
9.98	0.65938	0.534178	0.533352
9.99	0.650315	0.546077	0.506049
10	0.623812	0.588265	0.521551
10.01	0.63081	0.589411	0.501483
10.02	0.658623	0.581057	0.52135
10.03	0.604976	0.612452	0.542474
10.04	0.634316	0.597378	0.520904
10.05	0.643173	0.60883	0.511828
10.06	0.635886	0.57158	0.509598
10.07	0.644076	0.593046	0.513696
10.08	0.627761	0.601512	0.521087
10.09	0.610773	0.588395	0.516375
10.1	0.641941	0.602902	0.496052
10.11	0.638045	0.612452	0.465029
10.12	0.657175	0.604244	0.495593
10.13	0.641762	0.628744	0.491439
10.14	0.614491	0.645063	0.48476
10.15	0.642642	0.650125	0.468511
10.16	0.659411	0.626099	0.494336
10.17	0.673501	0.638115	0.455694
10.18	0.684732	0.662451	0.457612
10.19	0.68569	0.61231	0.471497
10.2	0.674093	0.630357	0.50752
10.21	0.691741	0.6259	0.495567
10.22	0.690727	0.605218	0.502929
10.23	0.653407	0.594894	0.497332
10.24	0.663639	0.632351	0.447237
10.25	0.669006	0.629874	0.465026
10.26	0.673075	0.590303	0.480032
10.27	0.64299	0.59191	0.442046
10.28	0.678206	0.577292	0.437243
10.29	0.644757	0.531213	0.42694
10.3	0.653573	0.538507	0.402088
10.31	0.666275	0.571059	0.472254
10.32	0.681579	0.573522	0.457569
10.33	0.705805	0.579384	0.497224
10.34	0.68554	0.57654	0.507005
10.35	0.687817	0.591437	0.536379
10.36	0.678018	0.580557	0.52921
10.37	0.679477	0.599415	0.534329
10.38	0.675806	0.579342	0.51861
10.39	0.660667	0.569895	0.486012
10.4	0.670196	0.618867	0.533869
10.41	0.689866	0.598544	0.527551
10.42	0.66808	0.650838	0.522808
10.43	0.697923	0.609023	0.521739
10.44	0.702529	0.626946	0.525592
10.45	0.703649	0.630305	0.50313
10.46	0.692216	0.654833	0.473954
10.47	0.683741	0.676304	0.484122
10.48	0.711799	0.635864	0.460856
10.49	0.699838	0.619915	0.463278
10.5	0.678349	0.568997	0.443016
10.51	0.678718	0.62169	0.472639
10.52	0.691778	0.600491	0.508915
10.53	0.703489	0.579199	0.47747
10.54	0.683138	0.596293	0.487351
10.55	0.679484	0.60858	0.475213
10.56	0.676732	0.60385	0.483328
10.57	0.686533	0.617431	0.456193
10.58	0.677891	0.599997	0.476697
10.59	0.662616	0.577268	0.495957
10.6	0.692276	0.573505	0.494921
10.61	0.686044	0.571874	0.490358
10.62	0.649087	0.583903	0.500596
10.63	0.679793	0.558673	0.517717
10.64	0.652079	0.591499	0.526598
10.65	0.672373	0.582272	0.521896
10.66	0.651652	0.583341	0.495882
10.67	0.653949	0.598913	0.488511
10.68	0.679135	0.580967	0.56057
10.69	0.67648	0.567336	0.501337
10.7	0.670137	0.594063	0.517129
10.71	0.648839	0.563164	0.502106
10.72	0.650354	0.559383	0.530263
10.73	0.644459	0.579991	0.520801
10.74	0.643338	0.57837	0.555196
10.75	0.658277	0.588205	0.562853
10.76	0.651173	0.591356	0.544813
10.77	0.648112	0.604341	0.522159
10.78	0.667417	0.601667	0.514632
10.79	0.661176	0.652676	0.530382
10.8	0.650428	0.680077	0.496655
10.81	0.668145	0.668424	0.526611
10.82	0.650428	0.686586	0.514762
10.83	0.633423	0.718085	0.545809
10.84	0.658125	0.722085	0.52443
10.85	0.650919	0.733935	0.497946
10.86	0.677041	0.713446	0.486589
10.87	0.706926	0.699148	0.498843
10.88	0.667924	0.730544	0.552918
10.89	0.691585	0.718554	0.593589
10.9	0.718807	0.692107	0.600179
10.91	0.676304	0.670518	0.569035
10.92	0.647634	0.653749	0.553778
10.93	0.644382	0.693333	0.496273
10.94	0.619556	0.684508	0.505314
10.95	0.658574	0.64517	0.490391
10.96	0.664367	0.637802	0.480014
10.97	0.694075	0.649525	0.494996
10.98	0.641308	0.630436	0.464987
10.99	0.679548	0.653388	0.487119
11	0.629213	0.668026	0.472167
11.01	0.626893	0.647283	0.473029
11.02	0.628446	0.630069	0.49244
11.03	0.627371	0.608564	0.498462
11.04	0.602127	0.608479	0.510196
11.05	0.647353	0.599124	0.493893
11.06	0.629554	0.605668	0.500014
11.07	0.690118	0.558782	0.500741
11.08	0.667238	0.612531	0.496133
11.09	0.669992	0.598476	0.502645
11.1	0.659445	0.655312	0.481712
11.11	0.670516	0.644244	0.494802
11.12	0.598183	0.636201	0.481453
11.13	0.599908	0.630128	0.478778
11.14	0.623276	0.629717	0.492917
11.15	0.626774	0.617419	0.482073
11.16	0.646791	0.59972	0.471711
11.17	0.66198	0.625529	0.474599
11.18	0.675257	0.599458	0.481114
11.19	0.665238	0.602341	0.483617
11.2	0.682863	0.592946	0.437153
11.21	0.649964	0.589811	0.497088
11.22	0.640396	0.589785	0.496975
11.23	0.645122	0.586039	0.485672
11.24	0.662388	0.587008	0.463663
11.25	0.669623	0.597585	0.4918
11.26	0.657346	0.602448	0.482458
11.27	0.647784	0.630058	0.510015
11.28	0.604767	0.674491	0.517942
11.29	0.600183	0.662175	0.453359
11.3	0.606277	0.646124	0.506918
11.31	0.649854	0.626196	0.486118
11.32	0.675019	0.636226	0.460186
11.33	0.678507	0.601013	0.455797
11.34	0.682569	0.653898	0.469946
11.35	0.664471	0.67401	0.491877
11.36	0.66176	0.661126	0.52352
11.37	0.662166	0.701022	0.509599
11.38	0.662514	0.729608	0.47684
11.39	0.636558	0.732513	0.480638
11.4	0.663954	0.695005	0.499319
11.41	0.677774	0.725309	0.529658
11.42	0.675826	0.73915	0.505615
11.43	0.676944	0.724864	0.528268
11.44	0.67722	0.690755	0.520863
11.45	0.664148	0.689438	0.546964
11.46	0.648421	0.704869	0.538884
11.47	0.633976	0.715544	0.526888
11.48	0.630288	0.699457	0.538497
11.49	0.633044	0.674959	0.550336
11.5	0.628733	0.708013	0.540145
11.51	0.631602	0.703275	0.56738
11.52	0.638862	0.698975	0.586098
11.53	0.664982	0.702419	0.568756
11.54	0.683738	0.721853	0.577758
11.55	0.696383	0.738518	0.555782
11.56	0.694872	0.73768	0.569603
11.57	0.685667	0.742231	0.587426
11.58	0.685038	0.732559	0.50775
11.59	0.707373	0.723628	0.507
11.6	0.657623	0.756627	0.538811
11.61	0.714249	0.752483	0.525387
11.62	0.697803	0.779374	0.527654
11.63	0.674853	0.755396	0.509453
11.64	0.690423	0.745853	0.530932
11.65	0.694765	0.723123	0.544241
11.66	0.686559	0.731837	0.52194
11.67	0.664916	0.742565	0.523166
11.68	0.677539	0.779067	0.530329
11.69	0.689706	0.75453	0.510633
11.7	0.671179	0.738454	0.493953
11.71	0.696223	0.732963	0.539873
11.72	0.68005	0.73693	0.538454
11.73	0.645052	0.771183	0.52674
11.74	0.663813	0.758797	0.531328
11.75	0.611427	0.74253	0.501095
11.76	0.646219	0.766143	0.512937
11.77	0.657926	0.740222	0.527485
11.78	0.634639	0.755652	0.557343
11.79	0.618728	0.748783	0.559153
11.8	0.648407	0.770953	0.555003
11.81	0.651351	0.769734	0.565109
11.82	0.680566	0.769632	0.519525
11.83	0.659625	0.779034	0.528583
11.84	0.673632	0.753753	0.545246
11.85	0.661375	0.743857	0.543418
11.86	0.641732	0.723722	0.551467
11.87	0.645517	0.715608	0.547648
11.88	0.644607	0.78839	0.540642
11.89	0.649068	0.810421	0.523055
11.9	0.66069	0.826114	0.548547
11.91	0.680034	0.798617	0.519961
11.92	0.647323	0.802152	0.554719
11.93	0.6649	0.813933	0.549671
11.94	0.675936	0.797969	0.490642
11.95	0.653842	0.786023	0.515426
11.96	0.626281	0.800043	0.480229
11.97	0.625849	0.821633	0.52672
11.98	0.649567	0.820094	0.544743
11.99	0.65543	0.78889	0.527117
12	0.664398	0.784129	0.527409
12.01	0.684957	0.788542	0.526946
12.02	0.669027	0.771355	0.518032
12.03	0.657499	0.785134	0.514571
12.04	0.639542	0.773615	0.517333
12.05	0.64639	0.767801	0.510298
12.06	0.638007	0.762943	0.497305
12.07	0.654669	0.729816	0.542587
12.08	0.6602	0.713013	0.565857
12.09	0.646511	0.711814	0.565854
12.1	0.639103	0.658992	0.540524
12.11	0.676459	0.673887	0.556298
12.12	0.672907	0.738036	0.542951
12.13	0.662696	0.667284	0.542605
12.14	0.677265	0.716702	0.549312
12.15	0.692471	0.686359	0.552675
12.16	0.672432	0.687133	0.572371
12.17	0.667853	0.684008	0.571366
12.18	0.665298	0.739652	0.584488
12.19	0.683754	0.734431	0.570506
12.2	0.672652	0.725862	0.562602
12.21	0.709932	0.713206	0.559696
12.22	0.696922	0.704732	0.563312
12.23	0.69405	0.745959	0.576193
12.24	0.668169	0.721571	0.549967
12.25	0.651361	0.710789	0.561851
12.26	0.661569	0.70941	0.556656
12.27	0.642115	0.72598	0.524093
12.28	0.648997	0.750474	0.580597
12.29	0.65673	0.766841	0.570616
12.3	0.628322	0.770143	0.559914
12.31	0.606194	0.78467	0.530864
12.32	0.631795	0.807555	0.535107
12.33	0.666526	0.783719	0.556207
12.34	0.631166	0.741871	0.54523
12.35	0.621814	0.735559	0.539383
12.36	0.578895	0.71013	0.547144
12.37	0.56886	0.749371	0.561469
12.38	0.623533	0.738483	0.573739
12.39	0.582888	0.753454	0.557822
12.4	0.581814	0.735651	0.511524
12.41	0.563101	0.721574	0.540723
12.42	0.577697	0.717626	0.527521
12.43	0.560746	0.688963	0.523953
12.44	0.557137	0.694047	0.545727
12.45	0.566249	0.724779	0.559197
12.46	0.524864	0.719014	0.541566
12.47	0.542861	0.738301	0.551752
12.48	0.553224	0.734976	0.558816
12.49	0.58503	0.707651	0.551428
12.5	0.599838	0.726583	0.55525
12.51	0.581182	0.714742	0.55142
12.52	0.536572	0.709467	0.555666
12.53	0.538383	0.68181	0.547024
12.54	0.568211	0.691113	0.551898
12.55	0.553903	0.678502	0.530746
12.56	0.533697	0.704095	0.52
12.57	0.529227	0.723618	0.543132
12.58	0.549747	0.746349	0.513222
12.59	0.541873	0.722997	0.492484
12.6	0.526767	0.695078	0.498883
12.61	0.560035	0.68498	0.555243
12.62	0.553039	0.694949	0.527097
12.63	0.558839	0.684477	0.540382
12.64	0.509421	0.701522	0.546732
12.65	0.51044	0.715971	0.546041
12.66	0.534309	0.720939	0.526263
12.67	0.567246	0.722653	0.493301
12.68	0.588336	0.721468	0.500886
12.69	0.543584	0.743458	0.505264
12.7	0.559955	0.724507	0.486769
12.71	0.555939	0.746794	0.482933
12.72	0.617713	0.74619	0.499152
12.73	0.569823	0.690442	0.513646
12.74	0.569591	0.728344	0.506851
12.75	0.58657	0.692143	0.490496
12.76	0.577228	0.716403	0.493795
12.77	0.568673	0.693647	0.511833
12.78	0.554165	0.674605	0.473053
12.79	0.600275	0.725817	0.475948
12.8	0.610381	0.702921	0.465353
12.81	0.610276	0.756874	0.495543
12.82	0.613576	0.727814	0.482906
12.83	0.624266	0.700476	0.441178
12.84	0.613591	0.725003	0.471241
12.85	0.623297	0.694055	0.454783
12.86	0.576163	0.713768	0.498971
12.87	0.610247	0.714243	0.451343
12.88	0.571333	0.716806	0.439857
12.89	0.547604	0.678534	0.498041
12.9	0.558055	0.687598	0.470249
12.91	0.556809	0.68233	0.465473
12.92	0.590835	0.679018	0.465077
12.93	0.598502	0.674793	0.427245
12.94	0.588971	0.691484	0.427968
12.95	0.604222	0.693101	0.465728
12.96	0.560002	0.760488	0.475342
12.97	0.572914	0.702949	0.488689
12.98	0.554816	0.688958	0.522595
12.99	0.526654	0.735226	0.511383
13	0.547129	0.774601	0.484015
13.01	0.55142	0.748137	0.479396
13.02	0.541945	0.732696	0.452474
13.03	0.548941	0.76107	0.452378
13.04	0.556022	0.760899	0.478615
13.05	0.572561	0.719253	0.50827
13.06	0.554446	0.74918	0.535469
13.07	0.553331	0.766074	0.503063
13.08	0.598363	0.795071	0.474201
13.09	0.604615	0.75866	0.466205
13.1	0.610674	0.758729	0.468631
13.11	0.604988	0.739941	0.487049
13.12	0.596279	0.751522	0.472052
13.13	0.554197	0.728094	0.478663
13.14	0.586926	0.776671	0.469645
13.15	0.587397	0.766941	0.492524
13.16	0.575971	0.798909	0.473322
13.17	0.634894	0.770968	0.467048
13.18	0.608667	0.755036	0.488212
13.19	0.617304	0.761394	0.468415
13.2	0.578457	0.720566	0.446916
13.21	0.591066	0.738123	0.430115
13.22	0.620099	0.70968	0.464085
13.23	0.603914	0.727514	0.472581
13.24	0.604762	0.774075	0.442506
13.25	0.618997	0.735608	0.461565
13.26	0.59265	0.750765	0.445313
13.27	0.587604	0.74669	0.441961
13.28	0.636376	0.722297	0.457316
13.29	0.591935	0.693145	0.417783
13.3	0.624813	0.682643	0.412413
13.31	0.637894	0.716988	0.393455
13.32	0.637531	0.719298	0.423444
13.33	0.636932	0.700257	0.465205
13.34	0.622612	0.688146	0.457081
13.35	0.595513	0.717845	0.467493
13.36	0.634635	0.728771	0.464087
13.37	0.641222	0.780519	0.464098
13.38	0.619054	0.772311	0.468241
13.39	0.635861	0.710582	0.456892
13.4	0.603139	0.707498	0.459389
13.41	0.603557	0.699514	0.468557
13.42	0.580972	0.696555	0.464038
13.43	0.599895	0.752206	0.43684
13.44	0.56228	0.737368	0.46839
13.45	0.573541	0.702078	0.49364
13.46	0.575529	0.7178	0.461883
13.47	0.586054	0.661765	0.457536
13.48	0.60498	0.676695	0.455179
13.49	0.614442	0.692434	0.418267
13.5	0.589674	0.653461	0.452254
13.51	0.62019	0.685292	0.438155
13.52	0.567705	0.653207	0.406771
13.53	0.63007	0.648838	0.42681
13.54	0.614103	0.698492	0.425064
13.55	0.567303	0.691855	0.412486
13.56	0.578086	0.665275	0.412346
13.57	0.569791	0.657867	0.418346
13.58	0.600042	0.665505	0.429498
13.59	0.571181	0.714607	0.423416
13.6	0.550218	0.681844	0.447046
13.61	0.568028	0.714947	0.469113
13.62	0.56547	0.726944	0.436559
13.63	0.55041	0.765761	0.40199
13.64	0.54569	0.741766	0.435449
13.65	0.565847	0.720411	0.416592
13.66	0.567232	0.709196	0.419206
13.67	0.553861	0.713538	0.419073
13.68	0.533228	0.709029	0.415955
13.69	0.551785	0.716642	0.432802
13.7	0.545968	0.7033	0.433837
13.71	0.557658	0.718333	0.446453
13.72	0.568857	0.719185	0.440504
13.73	0.543152	0.734096	0.440575
13.74	0.513808	0.709035	0.427281
13.75	0.539866	0.737734	0.445396
13.76	0.531643	0.702383	0.439019
13.77	0.54005	0.716706	0.439939
13.78	0.572202	0.72198	0.454138
13.79	0.592774	0.717324	0.433521
13.8	0.578251	0.746367	0.425455
13.81	0.565523	0.783938	0.437816
13.82	0.565549	0.776032	0.408442
13.83	0.587602	0.800582	0.403094
13.84	0.596389	0.818018	0.405273
13.85	0.586558	0.783411	0.404663
13.86	0.588233	0.771382	0.423775
13.87	0.596094	0.735718	0.428974
13.88	0.56995	0.75477	0.431915
13.89	0.574952	0.734347	0.436816
13.9	0.52171	0.754015	0.425824
13.91	0.532316	0.725998	0.437684
13.92	0.52413	0.704925	0.423078
13.93	0.554915	0.72887	0.419157
13.94	0.557912	0.722104	0.412816
13.95	0.515305	0.704413	0.40248
13.96	0.505936	0.730313	0.38449
13.97	0.505541	0.776345	0.398315
13.98	0.57994	0.742457	0.427797
13.99	0.546385	0.709266	0.400454
14	0.56814	0.693699	0.392453
14.01	0.55497	0.721419	0.410617
14.02	0.555754	0.739404	0.400728
14.03	0.555692	0.744694	0.421333
14.04	0.612594	0.737311	0.411525
14.05	0.594415	0.703982	0.391586
14.06	0.567043	0.687834	0.420311
14.07	0.54001	0.741656	0.449442
14.08	0.586239	0.738462	0.425836
14.09	0.593817	0.743886	0.422329
14.1	0.616648	0.733189	0.440667
14.11	0.608777	0.750141	0.428358
14.12	0.609509	0.735978	0.410721
14.13	0.617834	0.736371	0.407953
14.14	0.638449	0.691473	0.434103
14.15	0.623989	0.691155	0.482947
14.16	0.571531	0.701987	0.472237
14.17	0.592029	0.71762	0.473533
14.18	0.620445	0.68463	0.470565
14.19	0.608726	0.664922	0.453479
14.2	0.635521	0.670949	0.455718
14.21	0.610332	0.663534	0.48399
14.22	0.594378	0.640025	0.480724
14.23	0.593624	0.660285	0.484708
14.24	0.633603	0.68387	0.492931
14.25	0.607932	0.731088	0.502996
14.26	0.566659	0.763295	0.511894
14.27	0.518244	0.732873	0.529491
14.28	0.486863	0.731812	0.487704
14.29	0.512587	0.709239	0.528446
14.3	0.529539	0.751092	0.50673
14.31	0.571825	0.742125	0.466266
14.32	0.524035	0.732749	0.462965
14.33	0.5223	0.715011	0.464128
14.34	0.507137	0.743406	0.47185
14.35	0.525475	0.756789	0.45992
14.36	0.492919	0.775523	0.489573
14.37	0.485656	0.781107	0.473815
14.38	0.500939	0.745385	0.46363
14.39	0.491463	0.70912	0.473914
14.4	0.475383	0.730275	0.474815
14.41	0.516963	0.698743	0.484807
14.42	0.530882	0.709182	0.463105
14.43	0.555115	0.726602	0.458661
14.44	0.571223	0.761516	0.458589
14.45	0.558163	0.757979	0.473559
14.46	0.522346	0.743662	0.473162
14.47	0.518717	0.742938	0.440171
14.48	0.513146	0.761815	0.447564
14.49	0.497591	0.788506	0.445014
14.5	0.502863	0.750128	0.463916
14.51	0.479796	0.74679	0.466495
14.52	0.470737	0.79473	0.4613
14.53	0.528431	0.802071	0.467145
14.54	0.545263	0.743046	0.50624
14.55	0.580211	0.792251	0.490266
14.56	0.600297	0.818407	0.507063
14.57	0.609788	0.80588	0.478122
14.58	0.599918	0.775328	0.453988
14.59	0.596625	0.772475	0.461582
14.6	0.601968	0.750807	0.42742
14.61	0.62561	0.789683	0.414855
14.62	0.640184	0.773745	0.445541
14.63	0.609525	0.780456	0.438214
14.64	0.566056	0.74124	0.458166
14.65	0.588479	0.769697	0.476428
14.66	0.608449	0.768801	0.492962
14.67	0.582407	0.787833	0.484127
14.68	0.599216	0.78221	0.494952
14.69	0.582745	0.748275	0.471305
14.7	0.582377	0.763816	0.471753
14.71	0.555206	0.748684	0.456265
14.72	0.574852	0.766013	0.464853
14.73	0.599467	0.792548	0.465629
14.74	0.598258	0.755553	0.435124
14.75	0.569501	0.733657	0.429074
14.76	0.593126	0.742485	0.444757
14.77	0.564749	0.728113	0.410108
14.78	0.579186	0.730583	0.403167
14.79	0.584712	0.760798	0.44296
14.8	0.58446	0.770113	0.458707
14.81	0.556075	0.774363	0.465649
14.82	0.552985	0.74746	0.445834
14.83	0.55922	0.742547	0.451342
14.84	0.554867	0.738251	0.480188
14.85	0.55872	0.773962	0.468082
14.86	0.580117	0.778728	0.463072
14.87	0.556461	0.777507	0.46209
14.88	0.591973	0.735355	0.494952
14.89	0.60119	0.744111	0.480512
14.9	0.606566	0.743684	0.486393
14.91	0.547485	0.73934	0.509844
14.92	0.568782	0.741779	0.48851
14.93	0.55422	0.724967	0.503434
14.94	0.57428	0.746556	0.526834
14.95	0.589677	0.744866	0.494594
14.96	0.612681	0.713327	0.476352
14.97	0.59518	0.71877	0.493253
14.98	0.570297	0.739725	0.481561
14.99	0.561339	0.740412	0.465448
15	0.563856	0.738759	0.451883
15.01	0.538182	0.76287	0.44196
15.02	0.555117	0.740007	0.455491
15.03	0.568397	0.742562	0.493127
15.04	0.538956	0.739038	0.471146
15.05	0.509078	0.741644	0.482386
15.06	0.538631	0.750111	0.504133
15.07	0.53835	0.76148	0.500007
15.08	0.534648	0.767958	0.493596
15.09	0.520797	0.729143	0.494708
15.1	0.524085	0.721443	0.461671
15.11	0.572316	0.706724	0.484283
15.12	0.538699	0.751036	0.490927
15.13	0.555218	0.733436	0.509186
15.14	0.560923	0.712092	0.491116
15.15	0.605686	0.738798	0.50258
15.16	0.590609	0.742661	0.481874
15.17	0.591187	0.750577	0.480041
15.18	0.596784	0.761065	0.482052
15.19	0.591307	0.762008	0.499767
15.2	0.575505	0.775194	0.53407
15.21	0.590226	0.779504	0.50766
15.22	0.58389	0.75982	0.506016
15.23	0.58347	0.769573	0.498994
15.24	0.54321	0.758584	0.474372
15.25	0.568348	0.825928	0.505189
15.26	0.599805	0.782621	0.473859
15.27	0.531406	0.818453	0.498127
15.28	0.547643	0.770752	0.499267
15.29	0.54625	0.779456	0.517632
15.3	0.554758	0.796845	0.506401
15.31	0.586669	0.769696	0.511269
15.32	0.573025	0.778785	0.504634
15.33	0.56051	0.814241	0.502264
15.34	0.567844	0.830061	0.520154
15.35	0.556088	0.853438	0.500783
15.36	0.55382	0.789809	0.494912
15.37	0.577346	0.787085	0.454769
15.38	0.582394	0.773072	0.459165
15.39	0.602982	0.765978	0.46608
15.4	0.611805	0.802752	0.443857
15.41	0.558712	0.788175	0.453123
15.42	0.57489	0.783476	0.469307
15.43	0.54919	0.765342	0.436905
15.44	0.551154	0.741394	0.440244
15.45	0.560025	0.786125	0.440735
15.46	0.519924	0.798297	0.442896
15.47	0.49274	0.778205	0.443068
15.48	0.549671	0.774572	0.443111
15.49	0.545559	0.727383	0.474387
15.5	0.561769	0.757118	0.447278
15.51	0.517995	0.721894	0.461113
15.52	0.569844	0.745542	0.452022
15.53	0.543168	0.751209	0.468577
15.54	0.554771	0.742442	0.474062
15.55	0.525317	0.726749	0.468785
15.56	0.57229	0.72126	0.471675
15.57	0.599347	0.759782	0.458076
15.58	0.628307	0.759788	0.440162
15.59	0.594712	0.741733	0.430117
15.6	0.645692	0.736323	0.423659
15.61	0.554007	0.702038	0.446866
15.62	0.536202	0.733326	0.435357
15.63	0.541153	0.761438	0.391589
15.64	0.528686	0.755345	0.438893
15.65	0.545231	0.730985	0.423227
15.66	0.563011	0.75309	0.432676
15.67	0.552516	0.755685	0.421438
15.68	0.514153	0.778209	0.436748
15.69	0.54559	0.773947	0.437187
15.7	0.533928	0.741962	0.445356
15.71	0.560311	0.752966	0.434439
15.72	0.565255	0.755568	0.427138
15.73	0.592836	0.76518	0.417766
15.74	0.577318	0.722834	0.426592
15.75	0.556117	0.763019	0.445035
15.76	0.555973	0.758847	0.455662
15.77	0.519717	0.773776	0.476703
15.78	0.57079	0.765095	0.486026
15.79	0.566265	0.766087	0.485829
15.8	0.565016	0.753192	0.477096
15.81	0.58267	0.75237	0.479669
15.82	0.572628	0.717932	0.48793
15.83	0.564201	0.714619	0.518054
15.84	0.597874	0.706601	0.501417
15.85	0.60139	0.740107	0.476146
15.86	0.589448	0.731546	0.490897
15.87	0.604022	0.76614	0.527109
15.88	0.587071	0.773464	0.528311
15.89	0.569002	0.767403	0.509432
15.9	0.541891	0.730196	0.512036
15.91	0.548249	0.727551	0.506898
15.92	0.549369	0.767383	0.512825
15.93	0.548999	0.743676	0.522428
15.94	0.562172	0.759343	0.514877
15.95	0.525845	0.734106	0.487149
15.96	0.536815	0.743575	0.495641
15.97	0.55073	0.740427	0.484223
15.98	0.54192	0.760233	0.517467
15.99	0.563817	0.770172	0.505494
16	0.588629	0.7863	0.516663
16.01	0.592331	0.767598	0.476849
16.02	0.564088	0.760385	0.489154
16.03	0.593702	0.744223	0.489542
16.04	0.595792	0.733463	0.487323
16.05	0.591555	0.723112	0.491787
16.06	0.552941	0.725765	0.499202
16.07	0.598034	0.734194	0.519655
16.08	0.619602	0.744758	0.494767
16.09	0.566729	0.747355	0.457768
16.1	0.56397	0.781671	0.465837
16.11	0.548765	0.758161	0.471921
16.12	0.566443	0.768775	0.502169
16.13	0.530126	0.750506	0.468419
16.14	0.553994	0.756791	0.429184
16.15	0.540572	0.761313	0.456415
16.16	0.575184	0.744113	0.508352
16.17	0.575154	0.742264	0.493544
16.18	0.543098	0.745474	0.487921
16.19	0.596698	0.753399	0.527458
16.2	0.569353	0.747781	0.546182
16.21	0.585686	0.745853	0.491125
16.22	0.561815	0.691473	0.503965
16.23	0.589219	0.678381	0.503841
16.24	0.571888	0.725252	0.477204
16.25	0.556742	0.744251	0.473496
16.26	0.561811	0.730191	0.507003
16.27	0.585507	0.761828	0.504588
16.28	0.553761	0.756219	0.508547
16.29	0.532528	0.796493	0.498606
16.3	0.521422	0.799024	0.480955
16.31	0.55042	0.781034	0.502111
16.32	0.553209	0.793032	0.495832
16.33	0.579416	0.775962	0.51491
16.34	0.572657	0.789318	0.492588
16.35	0.581111	0.761636	0.514599
16.36	0.629308	0.813297	0.499477
16.37	0.616953	0.797647	0.522732
16.38	0.594045	0.821568	0.522783
16.39	0.58931	0.809729	0.537899
16.4	0.581183	0.803504	0.496866
16.41	0.620758	0.796013	0.485455
16.42	0.571454	0.764482	0.504841
16.43	0.582051	0.774012	0.51744
16.44	0.551214	0.800918	0.48333
16.45	0.607319	0.800241	0.486888
16.46	0.575092	0.768198	0.453927
16.47	0.542096	0.81642	0.482209
16.48	0.600622	0.808284	0.476272
16.49	0.621908	0.791598	0.484785
16.5	0.651053	0.774049	0.482937
16.51	0.642824	0.777368	0.476683
16.52	0.633446	0.751778	0.493433
16.53	0.644766	0.764618	0.46641
16.54	0.634242	0.746635	0.477654
16.55	0.619206	0.753706	0.490246
16.56	0.642689	0.735644	0.471831
16.57	0.684702	0.743661	0.457225
16.58	0.686061	0.717415	0.462346
16.59	0.648515	0.732558	0.459431
16.6	0.669462	0.775264	0.451533
16.61	0.636747	0.758169	0.48793
16.62	0.672828	0.722725	0.442127
16.63	0.668663	0.73336	0.445837
16.64	0.668173	0.733278	0.45482
16.65	0.687192	0.721626	0.45058
16.66	0.705992	0.76703	0.450323
16.67	0.686577	0.759602	0.451543
16.68	0.676386	0.726287	0.468336
16.69	0.680753	0.733387	0.468979
16.7	0.706771	0.787019	0.46603
16.71	0.69083	0.806605	0.470311
16.72	0.662352	0.792129	0.461343
16.73	0.66353	0.791897	0.454953
16.74	0.644395	0.820475	0.440176
16.75	0.633553	0.825951	0.445881
16.76	0.621418	0.821857	0.458016
16.77	0.611647	0.801921	0.44422
16.78	0.637057	0.822898	0.456332
16.79	0.648763	0.819143	0.435926
16.8	0.623942	0.807295	0.468666
16.81	0.649121	0.799077	0.481778
16.82	0.632595	0.796474	0.4855
16.83	0.602601	0.807838	0.48594
16.84	0.609783	0.816977	0.460709
16.85	0.626951	0.818522	0.464057
16.86	0.629025	0.832672	0.441906
16.87	0.602566	0.816957	0.449258
16.88	0.614506	0.810976	0.434481
16.89	0.6053	0.783783	0.478084
16.9	0.609511	0.798602	0.482905
16.91	0.618316	0.816074	0.446366
16.92	0.568009	0.812819	0.436938
16.93	0.575427	0.805669	0.434816
16.94	0.576299	0.798538	0.440572
16.95	0.584139	0.813593	0.419331
16.96	0.576462	0.825446	0.42773
16.97	0.572711	0.846141	0.426094
16.98	0.564122	0.838015	0.430351
16.99	0.584255	0.810165	0.432255
17	0.586718	0.800766	0.436001
17.01	0.601676	0.828324	0.443263
17.02	0.58179	0.803083	0.431729
17.03	0.568833	0.775586	0.421931
17.04	0.583799	0.796026	0.416045
17.05	0.602936	0.767943	0.462382
17.06	0.593852	0.763836	0.476187
17.07	0.595355	0.765219	0.434276
17.08	0.571139	0.775535	0.446615
17.09	0.589282	0.785264	0.41127
17.1	0.580699	0.781332	0.417342
17.11	0.609641	0.774149	0.434229
17.12	0.599373	0.782133	0.415798
17.13	0.572646	0.76457	0.429918
17.14	0.586826	0.813737	0.463258
17.15	0.584981	0.810078	0.419389
17.16	0.610681	0.821297	0.43981
17.17	0.578683	0.793989	0.463434
17.18	0.605103	0.748528	0.472255
17.19	0.593232	0.755882	0.457724
17.2	0.61685	0.750587	0.423678
17.21	0.624922	0.758779	0.412889
17.22	0.620659	0.710182	0.436368
17.23	0.593412	0.727186	0.44369
17.24	0.609647	0.704979	0.448438
17.25	0.594597	0.713273	0.476284
17.26	0.622555	0.734267	0.494429
17.27	0.592676	0.754851	0.484328
17.28	0.620575	0.780033	0.47922
17.29	0.612797	0.777238	0.504024
17.3	0.587956	0.786065	0.507481
17.31	0.594241	0.798392	0.502573
17.32	0.585275	0.806849	0.490192
17.33	0.632485	0.79293	0.498684
17.34	0.612122	0.809035	0.490156
17.35	0.605016	0.776468	0.504866
17.36	0.611654	0.798486	0.496357
17.37	0.624174	0.772356	0.501223
17.38	0.644096	0.783811	0.489836
17.39	0.671131	0.795031	0.511148
17.4	0.661982	0.739905	0.488866
17.41	0.658911	0.711802	0.502798
17.42	0.658382	0.765777	0.517879
17.43	0.646608	0.74924	0.529785
17.44	0.665708	0.776583	0.518372
17.45	0.69108	0.748556	0.502794
17.46	0.694286	0.74642	0.518439
17.47	0.671114	0.724987	0.507748
17.48	0.672603	0.754955	0.508436
17.49	0.658375	0.75435	0.508547
17.5	0.654054	0.78678	0.516075
17.51	0.647838	0.77858	0.515788
17.52	0.634798	0.795475	0.530712
17.53	0.684143	0.776084	0.516047
17.54	0.689128	0.820226	0.50625
17.55	0.649695	0.784647	0.505558
17.56	0.646593	0.786476	0.546841
17.57	0.626714	0.790193	0.532898
17.58	0.636308	0.772297	0.546671
17.59	0.665016	0.823719	0.541984
17.6	0.668323	0.79402	0.550489
17.61	0.653947	0.797341	0.561057
17.62	0.678357	0.758215	0.519488
17.63	0.674111	0.770334	0.518542
17.64	0.640409	0.780769	0.543681
17.65	0.627652	0.786997	0.552114
17.66	0.646787	0.803274	0.584365
17.67	0.646761	0.731802	0.57519
17.68	0.601825	0.762092	0.561154
17.69	0.634966	0.758574	0.581137
17.7	0.630133	0.771517	0.597214
17.71	0.646532	0.75591	0.584006
17.72	0.632719	0.788816	0.564536
17.73	0.625182	0.760907	0.561063
17.74	0.641838	0.782401	0.527267
17.75	0.611086	0.786994	0.535926
17.76	0.627945	0.798516	0.520888
17.77	0.61841	0.816043	0.540253
17.78	0.643573	0.807709	0.532325
17.79	0.666077	0.804088	0.521713
17.8	0.656931	0.775494	0.50886
17.81	0.66166	0.794399	0.507701
17.82	0.646965	0.788164	0.483866
17.83	0.649084	0.777639	0.494123
17.84	0.645637	0.767451	0.4805
17.85	0.63598	0.78078	0.488315
17.86	0.590927	0.810897	0.483735
17.87	0.630043	0.791836	0.493163
17.88	0.634482	0.788937	0.45884
17.89	0.664139	0.765706	0.451791
17.9	0.617038	0.767445	0.4364
17.91	0.64957	0.745046	0.412999
17.92	0.628582	0.770908	0.43062
17.93	0.588618	0.734964	0.431123
17.94	0.600758	0.740562	0.459935
17.95	0.632603	0.753213	0.428526
17.96	0.619854	0.742162	0.424992
17.97	0.624372	0.739442	0.46035
17.98	0.63225	0.744067	0.474293
17.99	0.641012	0.736526	0.51104
18	0.649033	0.746213	0.484275
18.01	0.60786	0.75589	0.460398
18.02	0.605897	0.763467	0.449777
18.03	0.618631	0.743627	0.46651
18.04	0.612792	0.755197	0.486484
18.05	0.608472	0.739716	0.46505
18.06	0.615671	0.721526	0.477784
18.07	0.601606	0.745436	0.477034
18.08	0.630135	0.769251	0.508428
18.09	0.643904	0.78203	0.527348
18.1	0.666981	0.750893	0.514369
18.11	0.695696	0.74642	0.490889
18.12	0.663404	0.766867	0.484894
18.13	0.630635	0.736954	0.437209
18.14	0.644944	0.724496	0.445126
18.15	0.628933	0.758102	0.443514
18.16	0.621676	0.7621	0.453302
18.17	0.622024	0.744305	0.448927
18.18	0.642875	0.759529	0.480266
18.19	0.669661	0.735081	0.438301
18.2	0.642199	0.727836	0.455814
18.21	0.616001	0.721327	0.451207
18.22	0.586243	0.741824	0.43078
18.23	0.6261	0.756879	0.446325
18.24	0.604717	0.737874	0.441122
18.25	0.628035	0.73766	0.442044
18.26	0.629959	0.756833	0.456775
18.27	0.611805	0.762136	0.45774
18.28	0.61347	0.770104	0.500771
18.29	0.615558	0.749098	0.477576
18.3	0.604942	0.749796	0.464763
18.31	0.603174	0.748009	0.471837
18.32	0.637743	0.752892	0.485244
18.33	0.642168	0.764575	0.480947
18.34	0.6493	0.770901	0.469276
18.35	0.666237	0.754177	0.471585
18.36	0.688181	0.750365	0.483426
18.37	0.691063	0.757414	0.481636
18.38	0.687003	0.753568	0.491356
18.39	0.702475	0.746384	0.462457
18.4	0.673593	0.758557	0.447173
18.41	0.693018	0.7731	0.416658
18.42	0.703237	0.776434	0.429281
18.43	0.698408	0.765177	0.437506
18.44	0.714136	0.757806	0.403072
18.45	0.693732	0.744904	0.414924
18.46	0.657602	0.740597	0.438384
18.47	0.704964	0.758231	0.462204
18.48	0.680992	0.742085	0.439964
18.49	0.702732	0.772425	0.442541
18.5	0.708895	0.790959	0.427503
18.51	0.692973	0.76965	0.417096
18.52	0.709181	0.787184	0.414868
18.53	0.712982	0.763366	0.456124
18.54	0.696596	0.789983	0.460498
18.55	0.660751	0.78341	0.440226
18.56	0.683139	0.760909	0.47892
18.57	0.659225	0.768377	0.475239
18.58	0.638726	0.775133	0.452539
18.59	0.649036	0.758	0.434109
18.6	0.618086	0.742301	0.420813
18.61	0.626179	0.734017	0.43189
18.62	0.621913	0.75514	0.430712
18.63	0.608533	0.741437	0.441532
18.64	0.59822	0.744595	0.450416
18.65	0.585597	0.739641	0.468678
18.66	0.59205	0.713954	0.460381
18.67	0.580345	0.737478	0.471102
18.68	0.625568	0.775522	0.425992
18.69	0.599506	0.75703	0.43228
18.7	0.61882	0.780829	0.395608
18.71	0.605884	0.765952	0.428638
18.72	0.574607	0.759398	0.399073
18.73	0.59394	0.758369	0.428844
18.74	0.561766	0.779021	0.452925
18.75	0.619875	0.757618	0.415371
18.76	0.638547	0.735383	0.446916
18.77	0.601414	0.772992	0.420832
18.78	0.594875	0.740246	0.438309
18.79	0.581293	0.766114	0.439509
18.8	0.612589	0.776205	0.433288
18.81	0.604476	0.773749	0.429852
18.82	0.61185	0.755366	0.434096
18.83	0.605827	0.754545	0.442162
18.84	0.607926	0.769173	0.40923
18.85	0.620009	0.767431	0.434485
18.86	0.62168	0.775657	0.451817
18.87	0.596565	0.779115	0.443351
18.88	0.608093	0.729204	0.455319
18.89	0.582707	0.730095	0.462321
18.9	0.580479	0.752123	0.496668
18.91	0.55991	0.750937	0.466806
18.92	0.580762	0.758299	0.466971
18.93	0.57823	0.746155	0.470183
18.94	0.602206	0.737916	0.454991
18.95	0.585018	0.757768	0.437793
18.96	0.61537	0.728681	0.473794
18.97	0.59528	0.757158	0.454504
18.98	0.636217	0.74752	0.456414
18.99	0.628155	0.747808	0.481805
19	0.618341	0.745061	0.478264
19.01	0.592282	0.741126	0.45212
19.02	0.58315	0.746034	0.460695
19.03	0.608577	0.750175	0.479185
19.04	0.612096	0.768533	0.515169
19.05	0.595751	0.762694	0.48131
19.06	0.647373	0.752804	0.472394
19.07	0.642695	0.77886	0.481837
19.08	0.609391	0.735793	0.453155
19.09	0.593905	0.742702	0.463973
19.1	0.580681	0.770305	0.477558
19.11	0.582364	0.786681	0.469214
19.12	0.580078	0.803284	0.425872
19.13	0.579169	0.790311	0.454979
19.14	0.600279	0.785741	0.434613
19.15	0.656839	0.77616	0.402662
19.16	0.626881	0.794967	0.418275
19.17	0.564501	0.80883	0.422603
19.18	0.619198	0.787113	0.46434
19.19	0.623766	0.783593	0.450968
19.2	0.634066	0.772744	0.436064
19.21	0.628663	0.754979	0.448228
19.22	0.610833	0.755728	0.421048
19.23	0.584762	0.752554	0.425453
19.24	0.59354	0.764606	0.400627
19.25	0.602668	0.763093	0.435453
19.26	0.596252	0.772269	0.423285
19.27	0.59309	0.765661	0.459198
19.28	0.615088	0.770264	0.437252
19.29	0.593442	0.763739	0.459747
19.3	0.572161	0.75676	0.437275
19.31	0.598253	0.754277	0.416172
19.32	0.545967	0.776751	0.391987
19.33	0.569079	0.764484	0.405998
19.34	0.581998	0.778645	0.398704
19.35	0.604267	0.784217	0.393461
19.36	0.589821	0.784685	0.410491
19.37	0.622068	0.756543	0.407682
19.38	0.592524	0.728667	0.42039
19.39	0.58992	0.750744	0.440572
19.4	0.647743	0.753408	0.427958
19.41	0.627224	0.761756	0.399706
19.42	0.60815	0.73773	0.394217
19.43	0.61535	0.747801	0.413833
19.44	0.618343	0.746808	0.429827
19.45	0.621678	0.73416	0.419192
19.46	0.624329	0.750919	0.378666
19.47	0.599191	0.748782	0.388148
19.48	0.610523	0.764908	0.399885
19.49	0.631584	0.758736	0.442112
19.5	0.622783	0.743861	0.426432
19.51	0.620761	0.769065	0.447696
19.52	0.598064	0.750541	0.450632
19.53	0.612429	0.77101	0.402816
19.54	0.597693	0.811471	0.434569
19.55	0.60861	0.790392	0.473317
19.56	0.623707	0.796039	0.449535
19.57	0.589529	0.816837	0.407867
19.58	0.627508	0.794681	0.419134
19.59	0.632189	0.786453	0.415385
19.6	0.648645	0.78608	0.39749
19.61	0.623602	0.772094	0.394169
19.62	0.622867	0.761099	0.386626
19.63	0.6219	0.75555	0.382719
19.64	0.603162	0.762065	0.382621
19.65	0.606713	0.779724	0.365569
19.66	0.590074	0.776391	0.367345
19.67	0.598353	0.773704	0.358687
19.68	0.598575	0.770161	0.360554
19.69	0.578057	0.744891	0.40618
19.7	0.625225	0.782399	0.362768
19.71	0.572014	0.810825	0.361989
19.72	0.594253	0.780789	0.406989
19.73	0.596809	0.783175	0.358229
19.74	0.635552	0.798019	0.32215
19.75	0.617893	0.83235	0.350124
19.76	0.636676	0.831142	0.35742
19.77	0.60091	0.825256	0.332083
19.78	0.60435	0.805944	0.334453
19.79	0.60416	0.821002	0.323031
19.8	0.573995	0.796764	0.324488
19.81	0.580502	0.808421	0.34039
19.82	0.591875	0.769845	0.354412
19.83	0.615333	0.781513	0.320288
19.84	0.623089	0.767212	0.351854
19.85	0.606701	0.757913	0.344581
19.86	0.617214	0.762576	0.363102
19.87	0.623397	0.749561	0.340101
19.88	0.628308	0.770152	0.33997
19.89	0.646049	0.790116	0.359161
19.9	0.662214	0.781029	0.343821
19.91	0.633291	0.77287	0.361894
19.92	0.627584	0.745133	0.352962
19.93	0.650349	0.762682	0.345884
19.94	0.603611	0.762309	0.358586
19.95	0.616197	0.786193	0.330584
19.96	0.614979	0.769246	0.33061
19.97	0.60236	0.775624	0.352263
19.98	0.583629	0.778049	0.33855
[truncated: 48,002 more rows]

## Sheet: Saquinavir
Time	Replica_1	Replica_2	Replica_3
0	0.0004804	0.0004972	0.0004904
0.01	0.0911913	0.0936819	0.097771
0.02	0.0943494	0.104219	0.117959
0.03	0.0979171	0.145139	0.125585
0.04	0.134982	0.14179	0.123641
0.05	0.129628	0.12458	0.141817
0.06	0.146005	0.171956	0.141476
0.07	0.160167	0.16157	0.13241
0.08	0.167561	0.204276	0.133996
0.09	0.196752	0.217047	0.183955
0.1	0.233116	0.194049	0.153754
0.11	0.208259	0.169691	0.152662
0.12	0.215355	0.165973	0.15578
0.13	0.209531	0.189679	0.198433
0.14	0.20127	0.201972	0.217355
0.15	0.201578	0.176212	0.208365
0.16	0.206213	0.170559	0.198683
0.17	0.201613	0.199809	0.183213
0.18	0.228039	0.182475	0.205496
0.19	0.260854	0.192906	0.203503
0.2	0.243239	0.170653	0.15832
0.21	0.228192	0.174603	0.153032
0.22	0.191718	0.187249	0.140456
0.23	0.177562	0.203989	0.175094
0.24	0.159784	0.205667	0.167371
0.25	0.185592	0.261509	0.194995
0.26	0.212259	0.246805	0.191312
0.27	0.204544	0.233396	0.203786
0.28	0.205139	0.220423	0.225116
0.29	0.204287	0.244663	0.281035
0.3	0.244654	0.239246	0.262633
0.31	0.239331	0.218441	0.309029
0.32	0.226276	0.187907	0.316016
0.33	0.208023	0.215051	0.32938
0.34	0.210759	0.201328	0.319714
0.35	0.210365	0.203702	0.309352
0.36	0.212202	0.209939	0.283275
0.37	0.221308	0.192276	0.26055
0.38	0.214486	0.203991	0.299827
0.39	0.210327	0.194477	0.273583
0.4	0.227701	0.191761	0.288269
0.41	0.25678	0.197434	0.31321
0.42	0.25943	0.181335	0.307915
0.43	0.232204	0.191373	0.357095
0.44	0.23918	0.192444	0.26712
0.45	0.226576	0.223042	0.267808
0.46	0.215345	0.229778	0.219448
0.47	0.2558	0.222883	0.289873
0.48	0.219683	0.237774	0.244504
0.49	0.228662	0.221493	0.215946
0.5	0.20221	0.188152	0.222271
0.51	0.221972	0.189161	0.217981
0.52	0.235111	0.224345	0.300408
0.53	0.25892	0.208456	0.314684
0.54	0.221711	0.209953	0.314655
0.55	0.265321	0.191891	0.294801
0.56	0.291697	0.198463	0.358397
0.57	0.256315	0.219522	0.296513
0.58	0.27385	0.193859	0.273077
0.59	0.283233	0.221791	0.29471
0.6	0.287221	0.23601	0.293067
0.61	0.273087	0.209986	0.292521
0.62	0.265236	0.209951	0.327298
0.63	0.270088	0.242513	0.322139
0.64	0.268507	0.238494	0.298456
0.65	0.281792	0.235158	0.311855
0.66	0.278307	0.24562	0.326405
0.67	0.264663	0.237922	0.34488
0.68	0.278967	0.254099	0.333249
0.69	0.261574	0.286168	0.343523
0.7	0.262351	0.276637	0.353908
0.71	0.264018	0.27567	0.322817
0.72	0.274494	0.278978	0.30557
0.73	0.277086	0.293081	0.288917
0.74	0.26104	0.285195	0.309239
0.75	0.277725	0.309195	0.305547
0.76	0.249965	0.319173	0.31306
0.77	0.257902	0.340994	0.334065
0.78	0.280241	0.333102	0.340444
0.79	0.266066	0.346051	0.3233
0.8	0.274981	0.33553	0.289432
0.81	0.287156	0.325048	0.27953
0.82	0.266179	0.327469	0.298517
0.83	0.251874	0.339173	0.307863
0.84	0.262614	0.377057	0.317778
0.85	0.249744	0.429658	0.306339
0.86	0.247528	0.392173	0.322808
0.87	0.270116	0.416779	0.27159
0.88	0.255213	0.394941	0.280875
0.89	0.260334	0.352243	0.265133
0.9	0.275945	0.390741	0.293665
0.91	0.28316	0.398961	0.321762
0.92	0.289192	0.392721	0.358404
0.93	0.322386	0.381146	0.329157
0.94	0.323323	0.386996	0.34252
0.95	0.309465	0.424463	0.311259
0.96	0.325844	0.406703	0.30694
0.97	0.272853	0.398551	0.314963
0.98	0.284809	0.36743	0.335558
0.99	0.326255	0.387339	0.323371
1	0.340824	0.381853	0.348785
1.01	0.326962	0.399122	0.356665
1.02	0.318635	0.369942	0.332444
1.03	0.314995	0.409104	0.358115
1.04	0.314895	0.393102	0.284014
1.05	0.32677	0.429208	0.282204
1.06	0.319313	0.407371	0.299485
1.07	0.330889	0.395526	0.307784
1.08	0.310399	0.367891	0.299512
1.09	0.320381	0.357276	0.302617
1.1	0.352892	0.359094	0.309526
1.11	0.348072	0.410328	0.263396
1.12	0.362833	0.407859	0.226234
1.13	0.374264	0.382541	0.260076
1.14	0.373036	0.414107	0.226624
1.15	0.340389	0.397552	0.236055
1.16	0.374144	0.393568	0.250329
1.17	0.322614	0.366928	0.228464
1.18	0.331043	0.361067	0.278155
1.19	0.303403	0.393232	0.291863
1.2	0.337015	0.37477	0.255633
1.21	0.337138	0.400149	0.214928
1.22	0.349399	0.402936	0.245829
1.23	0.34305	0.418343	0.245139
1.24	0.338776	0.431809	0.225655
1.25	0.334716	0.443255	0.272075
1.26	0.369735	0.458665	0.285236
1.27	0.377066	0.438987	0.277999
1.28	0.385472	0.449702	0.265484
1.29	0.357278	0.463965	0.238134
1.3	0.37257	0.449675	0.280133
1.31	0.415831	0.435833	0.251744
1.32	0.419828	0.453042	0.232338
1.33	0.393771	0.466935	0.26334
1.34	0.399596	0.460947	0.234481
1.35	0.361037	0.470728	0.22524
1.36	0.390751	0.462758	0.249417
1.37	0.332247	0.460564	0.268433
1.38	0.328713	0.483744	0.267024
1.39	0.325569	0.428217	0.265771
1.4	0.311295	0.452433	0.295341
1.41	0.29898	0.426878	0.287247
1.42	0.317511	0.452195	0.302032
1.43	0.355696	0.437478	0.313757
1.44	0.348762	0.446572	0.315499
1.45	0.362044	0.435425	0.28656
1.46	0.337995	0.444934	0.247901
1.47	0.371231	0.443627	0.258743
1.48	0.389694	0.394806	0.276423
1.49	0.410992	0.397095	0.241718
1.5	0.429556	0.393934	0.225614
1.51	0.419051	0.39872	0.253591
1.52	0.411186	0.403049	0.24596
1.53	0.432064	0.392163	0.244
1.54	0.459192	0.372989	0.314699
1.55	0.453936	0.407448	0.336127
1.56	0.476233	0.391738	0.343409
1.57	0.476419	0.408636	0.330785
1.58	0.475858	0.380276	0.354976
1.59	0.483261	0.391156	0.322879
1.6	0.493973	0.375388	0.339808
1.61	0.453974	0.379816	0.300755
1.62	0.459692	0.386418	0.298642
1.63	0.482719	0.387281	0.324812
1.64	0.498741	0.404865	0.304439
1.65	0.482625	0.41576	0.28842
1.66	0.436337	0.395857	0.298665
1.67	0.466196	0.38895	0.269301
1.68	0.470612	0.41766	0.254821
1.69	0.455865	0.407582	0.262511
1.7	0.434668	0.397211	0.256331
1.71	0.401618	0.407844	0.243459
1.72	0.390978	0.408092	0.230136
1.73	0.400835	0.396011	0.26095
1.74	0.387403	0.415633	0.258484
1.75	0.390097	0.406854	0.261431
1.76	0.397471	0.393424	0.258669
1.77	0.41357	0.36582	0.214988
1.78	0.436206	0.389288	0.267095
1.79	0.44214	0.415579	0.233171
1.8	0.435971	0.402658	0.245339
1.81	0.458589	0.402361	0.257149
1.82	0.413809	0.381842	0.308915
1.83	0.394652	0.385897	0.302468
1.84	0.398394	0.394383	0.314123
1.85	0.419616	0.417189	0.323722
1.86	0.406861	0.394083	0.312198
1.87	0.390382	0.375164	0.277175
1.88	0.351403	0.387168	0.25789
1.89	0.339963	0.396446	0.284852
1.9	0.375013	0.400915	0.272344
1.91	0.322122	0.403075	0.2958
1.92	0.34679	0.39435	0.29199
1.93	0.32709	0.370575	0.304115
1.94	0.315236	0.357719	0.256382
1.95	0.34957	0.385128	0.286492
1.96	0.333056	0.396392	0.310532
1.97	0.36305	0.373874	0.30992
1.98	0.379446	0.393659	0.348132
1.99	0.383969	0.373888	0.372394
2	0.368683	0.388375	0.331356
2.01	0.372903	0.423097	0.346985
2.02	0.372818	0.406792	0.335044
2.03	0.378976	0.393085	0.338722
2.04	0.355533	0.396523	0.293199
2.05	0.362715	0.399899	0.323949
2.06	0.373293	0.40877	0.337077
2.07	0.386541	0.399719	0.321235
2.08	0.401313	0.431573	0.325374
2.09	0.406783	0.420362	0.344907
2.1	0.428115	0.410278	0.342811
2.11	0.423989	0.400241	0.371636
2.12	0.381995	0.406289	0.335971
2.13	0.397752	0.382777	0.349259
2.14	0.379556	0.4019	0.357214
2.15	0.40351	0.376175	0.28785
2.16	0.399489	0.369032	0.329315
2.17	0.371464	0.40039	0.303402
2.18	0.397543	0.395782	0.286834
2.19	0.394696	0.442549	0.271106
2.2	0.425636	0.444492	0.259812
2.21	0.416688	0.438411	0.25568
2.22	0.412171	0.41337	0.324122
2.23	0.42073	0.429227	0.315844
2.24	0.441717	0.419	0.315742
2.25	0.412554	0.406104	0.288049
2.26	0.387339	0.417295	0.294685
2.27	0.413083	0.425661	0.323206
2.28	0.437442	0.41836	0.327151
2.29	0.431703	0.412222	0.368962
2.3	0.413679	0.385459	0.376945
2.31	0.455522	0.404454	0.326128
2.32	0.429149	0.43941	0.314653
2.33	0.434593	0.473426	0.323367
2.34	0.442689	0.451693	0.291996
2.35	0.423881	0.446441	0.331319
2.36	0.444009	0.468258	0.325417
2.37	0.411347	0.459769	0.306082
2.38	0.426414	0.471261	0.266578
2.39	0.400054	0.433804	0.218916
2.4	0.420554	0.406785	0.228423
2.41	0.418942	0.452712	0.242331
2.42	0.456369	0.441673	0.224486
2.43	0.440474	0.465538	0.20406
2.44	0.439509	0.454163	0.252367
2.45	0.462598	0.443509	0.252161
2.46	0.453833	0.453439	0.287232
2.47	0.486248	0.45173	0.286069
2.48	0.460147	0.423901	0.242397
2.49	0.45597	0.444612	0.23676
2.5	0.461841	0.422341	0.232067
2.51	0.436552	0.417662	0.226481
2.52	0.429079	0.435589	0.223291
2.53	0.44708	0.405892	0.20896
2.54	0.498812	0.417068	0.282758
2.55	0.523638	0.421241	0.236243
2.56	0.513084	0.406356	0.227836
2.57	0.475316	0.409104	0.175564
2.58	0.469133	0.386645	0.196812
2.59	0.503968	0.387675	0.212554
2.6	0.519608	0.385346	0.19219
2.61	0.552232	0.3871	0.199372
2.62	0.515573	0.387547	0.175653
2.63	0.501903	0.382979	0.185215
2.64	0.450404	0.398299	0.203339
2.65	0.489019	0.411348	0.219322
2.66	0.484516	0.401692	0.237224
2.67	0.439229	0.375248	0.24807
2.68	0.446147	0.410741	0.256942
2.69	0.421071	0.397151	0.289002
2.7	0.518544	0.394221	0.336368
2.71	0.507733	0.42564	0.322262
2.72	0.469032	0.393125	0.306293
2.73	0.524053	0.39323	0.318494
2.74	0.523887	0.386056	0.312738
2.75	0.488297	0.422907	0.316358
2.76	0.501329	0.426003	0.318149
2.77	0.511986	0.406246	0.276904
2.78	0.545212	0.409287	0.275082
2.79	0.464282	0.40832	0.289889
2.8	0.486327	0.43204	0.293508
2.81	0.507039	0.414178	0.234732
2.82	0.481328	0.422077	0.242275
2.83	0.500851	0.402674	0.219621
2.84	0.509482	0.416915	0.224198
2.85	0.52098	0.442009	0.238035
2.86	0.485851	0.426838	0.212321
2.87	0.474509	0.405899	0.233202
2.88	0.496825	0.416311	0.250232
2.89	0.500995	0.406251	0.241228
2.9	0.492127	0.425963	0.272888
2.91	0.540077	0.392707	0.2628
2.92	0.53934	0.398591	0.287132
2.93	0.594782	0.397413	0.269171
2.94	0.595302	0.396928	0.258416
2.95	0.587289	0.397318	0.238634
2.96	0.576966	0.403417	0.23714
2.97	0.580694	0.419322	0.209233
2.98	0.559928	0.392315	0.244761
2.99	0.560168	0.411839	0.262643
3	0.580767	0.409047	0.245652
3.01	0.620615	0.414321	0.263416
3.02	0.620766	0.406217	0.275302
3.03	0.609311	0.435891	0.300037
3.04	0.574269	0.434583	0.291169
3.05	0.603866	0.399947	0.293057
3.06	0.571451	0.382747	0.319267
3.07	0.571612	0.407661	0.298158
3.08	0.569283	0.387855	0.330354
3.09	0.58985	0.393832	0.339238
3.1	0.614391	0.452747	0.367413
3.11	0.588129	0.45596	0.344161
3.12	0.583436	0.449622	0.343721
3.13	0.581256	0.420402	0.348301
3.14	0.561353	0.427787	0.332584
3.15	0.574049	0.414291	0.341598
3.16	0.563311	0.4233	0.319959
3.17	0.585461	0.439542	0.334612
3.18	0.575248	0.443966	0.315357
3.19	0.560516	0.412534	0.314274
3.2	0.5407	0.398566	0.274538
3.21	0.553089	0.422929	0.309374
3.22	0.561917	0.429614	0.33225
3.23	0.548885	0.413342	0.343847
3.24	0.515514	0.423737	0.301739
3.25	0.524696	0.408681	0.330928
3.26	0.532947	0.4282	0.318675
3.27	0.517462	0.427388	0.31025
3.28	0.52147	0.416488	0.307097
3.29	0.54232	0.38995	0.328879
3.3	0.530422	0.397147	0.334602
3.31	0.521531	0.395394	0.330491
3.32	0.524623	0.405513	0.294769
3.33	0.539997	0.417107	0.314751
3.34	0.545509	0.389328	0.324475
3.35	0.527121	0.400589	0.320162
3.36	0.534469	0.396537	0.315519
3.37	0.528135	0.374319	0.31504
3.38	0.5453	0.366956	0.31463
3.39	0.523598	0.402652	0.325864
3.4	0.513315	0.402333	0.34075
3.41	0.518858	0.394219	0.341345
3.42	0.53028	0.397105	0.326471
3.43	0.50707	0.413289	0.324001
3.44	0.512485	0.422865	0.295393
3.45	0.523603	0.440589	0.313966
3.46	0.54544	0.41901	0.326442
3.47	0.538386	0.414646	0.31225
3.48	0.537339	0.402029	0.341224
3.49	0.544288	0.422183	0.341096
3.5	0.54728	0.404738	0.313848
3.51	0.539496	0.448378	0.366574
3.52	0.541199	0.446295	0.334722
3.53	0.568439	0.450304	0.318894
3.54	0.531335	0.454512	0.308285
3.55	0.55932	0.460457	0.332524
3.56	0.563779	0.47733	0.316269
3.57	0.56231	0.479108	0.322847
3.58	0.558653	0.480109	0.320879
3.59	0.559626	0.461719	0.314381
3.6	0.560413	0.447445	0.301103
3.61	0.563478	0.450005	0.355805
3.62	0.56175	0.451686	0.369339
3.63	0.576786	0.425162	0.302246
3.64	0.580819	0.462542	0.316807
3.65	0.590528	0.491451	0.318021
3.66	0.560088	0.491071	0.316163
3.67	0.564268	0.5216	0.324782
3.68	0.57559	0.499655	0.320874
3.69	0.568492	0.523686	0.359533
3.7	0.543111	0.505672	0.354909
3.71	0.53681	0.49184	0.367822
3.72	0.556871	0.48711	0.36609
3.73	0.556793	0.453775	0.306322
3.74	0.550075	0.422687	0.381903
3.75	0.557182	0.429614	0.382431
3.76	0.56712	0.425773	0.319584
3.77	0.564377	0.424032	0.340418
3.78	0.575061	0.427418	0.352066
3.79	0.548233	0.45932	0.345893
3.8	0.563329	0.446336	0.381604
3.81	0.56413	0.436066	0.379294
3.82	0.562353	0.445365	0.377511
3.83	0.588442	0.420997	0.382727
3.84	0.598136	0.431649	0.361156
3.85	0.574843	0.422623	0.351158
3.86	0.56448	0.43746	0.361369
3.87	0.562103	0.443257	0.368734
3.88	0.569991	0.415556	0.323572
3.89	0.595544	0.432608	0.357905
3.9	0.572437	0.44441	0.330705
3.91	0.557899	0.440305	0.300012
3.92	0.585966	0.395004	0.286485
3.93	0.584916	0.387879	0.315528
3.94	0.571888	0.412539	0.306588
3.95	0.56951	0.411674	0.344815
3.96	0.551242	0.37804	0.355207
3.97	0.567252	0.415847	0.300703
3.98	0.606562	0.421384	0.300591
3.99	0.570199	0.43332	0.283083
4	0.585682	0.426481	0.242311
4.01	0.573504	0.391948	0.254142
4.02	0.588598	0.381675	0.262966
4.03	0.599459	0.392925	0.26265
4.04	0.583717	0.388072	0.246818
4.05	0.6083	0.407253	0.250198
4.06	0.608115	0.431195	0.273374
4.07	0.592951	0.434161	0.268688
4.08	0.603049	0.418662	0.292456
4.09	0.584666	0.391558	0.299921
4.1	0.576921	0.365275	0.295857
4.11	0.59825	0.379531	0.29344
4.12	0.602436	0.398115	0.32719
4.13	0.619317	0.407617	0.327437
4.14	0.609124	0.395255	0.310594
4.15	0.607284	0.401081	0.288942
4.16	0.600642	0.406808	0.274309
4.17	0.580927	0.400944	0.277647
4.18	0.559744	0.375011	0.295706
4.19	0.580385	0.384349	0.273623
4.2	0.602765	0.39663	0.286245
4.21	0.550111	0.385907	0.299342
4.22	0.583934	0.377781	0.310555
4.23	0.573849	0.383599	0.329445
4.24	0.607325	0.356536	0.334977
4.25	0.560872	0.394623	0.320309
4.26	0.568081	0.383906	0.334562
4.27	0.563598	0.369592	0.341945
4.28	0.564221	0.391516	0.356615
4.29	0.569461	0.357102	0.381213
4.3	0.59236	0.380815	0.392024
4.31	0.579263	0.39279	0.390398
4.32	0.611145	0.364134	0.372785
4.33	0.58262	0.352684	0.343371
4.34	0.540158	0.372978	0.378971
4.35	0.576921	0.348828	0.344103
4.36	0.552305	0.368949	0.326476
4.37	0.578043	0.385352	0.319592
4.38	0.580129	0.392025	0.303406
4.39	0.641576	0.420027	0.310925
4.4	0.615589	0.377824	0.303629
4.41	0.566752	0.368221	0.309936
4.42	0.5756	0.350225	0.309008
4.43	0.540093	0.364637	0.326274
4.44	0.568069	0.369855	0.325842
4.45	0.577454	0.365648	0.29807
4.46	0.565133	0.381095	0.280689
4.47	0.581244	0.360638	0.296266
4.48	0.55791	0.406589	0.263558
4.49	0.587486	0.384627	0.280423
4.5	0.632802	0.380757	0.283925
4.51	0.630642	0.402204	0.305742
4.52	0.578608	0.385316	0.288168
4.53	0.53503	0.420945	0.278704
4.54	0.552385	0.427109	0.315212
4.55	0.559548	0.446298	0.321389
4.56	0.585203	0.455063	0.308019
4.57	0.581976	0.441693	0.300348
4.58	0.576659	0.418737	0.308862
4.59	0.569252	0.420368	0.319065
4.6	0.589133	0.416071	0.313199
4.61	0.54577	0.409102	0.330957
4.62	0.548711	0.389391	0.346249
4.63	0.573896	0.403563	0.322324
4.64	0.573503	0.386722	0.312748
4.65	0.555617	0.434016	0.301823
4.66	0.557743	0.421436	0.300064
4.67	0.550587	0.429647	0.307903
4.68	0.523336	0.442458	0.293067
4.69	0.54384	0.437371	0.277195
4.7	0.555147	0.446451	0.287692
4.71	0.537292	0.448543	0.292749
4.72	0.583802	0.476026	0.288162
4.73	0.59799	0.460662	0.320848
4.74	0.590307	0.456468	0.312271
4.75	0.599054	0.455436	0.282418
4.76	0.566296	0.449843	0.299341
4.77	0.553867	0.443797	0.304321
4.78	0.553961	0.419633	0.303986
4.79	0.580911	0.414868	0.2774
4.8	0.603798	0.396791	0.281693
4.81	0.593198	0.432649	0.310988
4.82	0.633381	0.43524	0.346936
4.83	0.615918	0.447109	0.309125
4.84	0.593793	0.439696	0.278212
4.85	0.564082	0.45256	0.300397
4.86	0.564189	0.457947	0.335359
4.87	0.542315	0.447137	0.330411
4.88	0.567541	0.452861	0.335936
4.89	0.53307	0.463386	0.328639
4.9	0.525938	0.458827	0.35159
4.91	0.54343	0.446844	0.340867
4.92	0.523291	0.449357	0.332267
4.93	0.559585	0.432939	0.326599
4.94	0.522407	0.432643	0.322834
4.95	0.540422	0.431163	0.336174
4.96	0.563679	0.426882	0.326419
4.97	0.532857	0.443031	0.32395
4.98	0.554811	0.425849	0.332668
4.99	0.586918	0.422954	0.342141
5	0.552813	0.431886	0.371355
5.01	0.539819	0.440292	0.382574
5.02	0.498327	0.422849	0.408757
5.03	0.500678	0.427988	0.445887
5.04	0.506207	0.412273	0.398496
5.05	0.486504	0.378717	0.412154
5.06	0.482737	0.391081	0.390019
5.07	0.506251	0.417828	0.419308
5.08	0.524275	0.405756	0.430183
5.09	0.521433	0.376441	0.464389
5.1	0.561639	0.372346	0.458933
5.11	0.534448	0.350289	0.414255
5.12	0.552115	0.399604	0.435203
5.13	0.539099	0.404402	0.441477
5.14	0.521404	0.414291	0.453928
5.15	0.538476	0.459337	0.444577
5.16	0.555892	0.433632	0.472924
5.17	0.527624	0.416211	0.487149
5.18	0.559334	0.42247	0.438342
5.19	0.5563	0.391297	0.435686
5.2	0.547283	0.37898	0.451798
5.21	0.539024	0.361725	0.431308
5.22	0.523979	0.390194	0.461887
5.23	0.52999	0.388362	0.438725
5.24	0.524901	0.409226	0.43066
5.25	0.500642	0.407799	0.408065
5.26	0.531772	0.420836	0.396837
5.27	0.521	0.426627	0.419794
5.28	0.534961	0.420845	0.440715
5.29	0.550625	0.435929	0.404368
5.3	0.535575	0.399495	0.435113
5.31	0.511113	0.39775	0.382907
5.32	0.51763	0.421276	0.378665
5.33	0.513782	0.409128	0.401079
5.34	0.52647	0.392408	0.381698
5.35	0.479676	0.382787	0.33369
5.36	0.494502	0.392937	0.319165
5.37	0.492571	0.375677	0.343765
5.38	0.473973	0.432179	0.38477
5.39	0.561462	0.408289	0.374525
5.4	0.5055	0.394323	0.394422
5.41	0.509434	0.391034	0.370722
5.42	0.544989	0.379572	0.383737
5.43	0.532076	0.415721	0.416247
5.44	0.489284	0.379341	0.416145
5.45	0.488234	0.381606	0.411966
5.46	0.465924	0.408824	0.415292
5.47	0.506159	0.423131	0.393415
5.48	0.512976	0.393081	0.404097
5.49	0.503848	0.423806	0.395434
5.5	0.507062	0.409888	0.379082
5.51	0.520802	0.421983	0.41519
5.52	0.493456	0.42623	0.409885
5.53	0.521226	0.408738	0.370899
5.54	0.511953	0.385429	0.3687
5.55	0.519723	0.430934	0.359648
5.56	0.494074	0.407729	0.350747
5.57	0.489648	0.441548	0.390566
5.58	0.508466	0.44373	0.384752
5.59	0.517753	0.432927	0.371513
5.6	0.511955	0.41203	0.38608
5.61	0.457742	0.443315	0.361339
5.62	0.472412	0.43989	0.402353
5.63	0.482879	0.437028	0.408542
5.64	0.474631	0.442491	0.415215
5.65	0.468334	0.442333	0.42581
5.66	0.486246	0.447576	0.46388
5.67	0.491741	0.424696	0.42336
5.68	0.498094	0.415097	0.440363
5.69	0.491379	0.412072	0.451975
5.7	0.515102	0.418173	0.462259
5.71	0.535239	0.427102	0.45449
5.72	0.526002	0.411751	0.494078
5.73	0.497036	0.410282	0.477183
5.74	0.484929	0.422692	0.446469
5.75	0.482799	0.427839	0.459483
5.76	0.49438	0.421216	0.480076
5.77	0.521688	0.427633	0.486554
5.78	0.503895	0.429933	0.495831
5.79	0.519989	0.420106	0.481799
5.8	0.506419	0.441984	0.495483
5.81	0.521149	0.446171	0.504505
5.82	0.515471	0.451408	0.566742
5.83	0.54878	0.434596	0.508761
5.84	0.496864	0.435749	0.517408
5.85	0.499684	0.410119	0.52044
5.86	0.479869	0.445661	0.48768
5.87	0.48332	0.432808	0.521957
5.88	0.495152	0.437773	0.550795
5.89	0.557558	0.438253	0.528557
5.9	0.549318	0.46085	0.501712
5.91	0.559604	0.451473	0.523964
5.92	0.563278	0.424416	0.535751
5.93	0.539032	0.437308	0.49688
5.94	0.554537	0.447631	0.469838
5.95	0.550875	0.446972	0.538167
5.96	0.507525	0.448514	0.549407
5.97	0.520731	0.472127	0.560889
5.98	0.484787	0.434986	0.574264
5.99	0.481344	0.435155	0.606734
6	0.500174	0.437353	0.592318
6.01	0.492664	0.422315	0.506924
6.02	0.536111	0.430644	0.514934
6.03	0.489968	0.440104	0.520836
6.04	0.524258	0.463416	0.552881
6.05	0.527586	0.444202	0.543416
6.06	0.522194	0.44654	0.559429
6.07	0.506034	0.454653	0.530759
6.08	0.51784	0.478612	0.50721
6.09	0.521578	0.463836	0.534821
6.1	0.542983	0.431027	0.517156
6.11	0.559295	0.455337	0.517127
6.12	0.549145	0.429571	0.504914
6.13	0.565792	0.442025	0.543724
6.14	0.54209	0.435865	0.548713
6.15	0.559795	0.438162	0.517532
6.16	0.549938	0.438244	0.484291
6.17	0.551045	0.41918	0.492486
6.18	0.52836	0.423332	0.512649
6.19	0.543117	0.41802	0.513942
6.2	0.544247	0.487579	0.528507
6.21	0.549627	0.49104	0.557437
6.22	0.537637	0.500223	0.537017
6.23	0.51722	0.523903	0.544438
6.24	0.514438	0.494155	0.514696
6.25	0.515172	0.492451	0.476515
6.26	0.49047	0.492577	0.501349
6.27	0.534635	0.478743	0.51096
6.28	0.481249	0.465536	0.514399
6.29	0.48801	0.479625	0.515524
6.3	0.491707	0.458923	0.533661
6.31	0.487437	0.436984	0.541063
6.32	0.479576	0.437363	0.539449
6.33	0.474502	0.438774	0.545711
6.34	0.479723	0.454474	0.527905
6.35	0.478193	0.44909	0.555133
6.36	0.493148	0.437607	0.545381
6.37	0.492597	0.426738	0.552453
6.38	0.502001	0.439343	0.545836
6.39	0.534263	0.451617	0.564902
6.4	0.536168	0.452337	0.599551
6.41	0.513267	0.423686	0.577302
6.42	0.504637	0.441709	0.575334
6.43	0.520274	0.456824	0.595593
6.44	0.514563	0.455519	0.557191
6.45	0.488513	0.438312	0.545523
6.46	0.510804	0.45424	0.569209
6.47	0.512788	0.473633	0.59393
6.48	0.529873	0.482989	0.582114
6.49	0.500399	0.490084	0.555176
6.5	0.499507	0.486088	0.572272
6.51	0.48456	0.481374	0.556823
6.52	0.507335	0.451917	0.574753
6.53	0.508661	0.453173	0.556018
6.54	0.583992	0.42401	0.563389
6.55	0.546258	0.46287	0.574711
6.56	0.491778	0.455225	0.539639
6.57	0.468947	0.444812	0.570608
6.58	0.478459	0.422865	0.530178
6.59	0.472139	0.444253	0.52595
6.6	0.500873	0.456168	0.550849
6.61	0.532079	0.466453	0.567446
6.62	0.47502	0.46022	0.549152
6.63	0.496427	0.450144	0.559241
6.64	0.474942	0.462312	0.561335
6.65	0.508067	0.461847	0.542097
6.66	0.544269	0.446162	0.556598
6.67	0.479242	0.454062	0.551048
6.68	0.510357	0.448285	0.571464
6.69	0.488851	0.441008	0.531136
6.7	0.507427	0.439648	0.611953
6.71	0.4806	0.448501	0.578777
6.72	0.536449	0.465573	0.563057
6.73	0.501798	0.467385	0.58633
6.74	0.509686	0.458103	0.583434
6.75	0.52576	0.468936	0.592028
6.76	0.521504	0.445328	0.558183
6.77	0.495333	0.455313	0.584529
6.78	0.504511	0.456457	0.594333
6.79	0.517695	0.464575	0.554969
6.8	0.461496	0.450718	0.546519
6.81	0.472515	0.45357	0.564252
6.82	0.480068	0.462026	0.564618
6.83	0.495593	0.461552	0.549183
6.84	0.467596	0.458438	0.548527
6.85	0.428382	0.478301	0.565632
6.86	0.431881	0.447499	0.598221
6.87	0.42148	0.474592	0.554115
6.88	0.434262	0.499168	0.545922
6.89	0.435776	0.445929	0.563842
6.9	0.449634	0.451992	0.574557
6.91	0.477214	0.448822	0.57409
6.92	0.479783	0.443826	0.586233
6.93	0.460051	0.44784	0.586694
6.94	0.483941	0.461171	0.584255
6.95	0.478987	0.464663	0.559181
6.96	0.493859	0.459729	0.557981
6.97	0.507972	0.459044	0.548036
6.98	0.529445	0.451539	0.55782
6.99	0.530396	0.433874	0.549287
7	0.479647	0.441213	0.568665
7.01	0.53257	0.471124	0.534742
7.02	0.513471	0.440165	0.566191
7.03	0.520343	0.462152	0.567752
7.04	0.544747	0.451896	0.565084
7.05	0.542649	0.401264	0.553755
7.06	0.536425	0.449627	0.54494
7.07	0.534279	0.427415	0.593807
7.08	0.514865	0.458598	0.575016
7.09	0.522323	0.440668	0.554222
7.1	0.53027	0.461009	0.528844
7.11	0.51751	0.469537	0.56759
7.12	0.506925	0.462826	0.531414
7.13	0.539883	0.487432	0.535832
7.14	0.544589	0.48322	0.532254
7.15	0.63189	0.479074	0.50564
7.16	0.551481	0.471376	0.48456
7.17	0.530877	0.462081	0.507403
7.18	0.57692	0.468822	0.477689
7.19	0.555637	0.465813	0.493859
7.2	0.568287	0.489958	0.510387
7.21	0.565534	0.495546	0.535062
7.22	0.57479	0.474474	0.51806
7.23	0.578296	0.475351	0.497928
7.24	0.588477	0.48383	0.530403
7.25	0.590699	0.467463	0.484624
7.26	0.560377	0.497757	0.430724
7.27	0.507258	0.50838	0.42072
7.28	0.506037	0.473633	0.414627
7.29	0.501851	0.483829	0.418532
7.3	0.480283	0.476636	0.425036
7.31	0.508828	0.493179	0.407727
7.32	0.51849	0.467397	0.430901
7.33	0.520371	0.454035	0.435064
7.34	0.508379	0.453394	0.43708
7.35	0.512766	0.473474	0.405752
7.36	0.484411	0.454365	0.375679
7.37	0.527536	0.467378	0.388902
7.38	0.521422	0.458182	0.397455
7.39	0.5299	0.461763	0.393479
7.4	0.529658	0.448185	0.387657
7.41	0.497354	0.44558	0.417919
7.42	0.45643	0.450663	0.392173
7.43	0.489788	0.466716	0.395416
7.44	0.481414	0.47255	0.355002
7.45	0.503672	0.476324	0.37018
7.46	0.493226	0.447568	0.349903
7.47	0.547544	0.453651	0.358548
7.48	0.5361	0.456687	0.385168
7.49	0.545209	0.463906	0.388231
7.5	0.523573	0.46689	0.399441
7.51	0.519406	0.44776	0.429658
7.52	0.542416	0.446594	0.376289
7.53	0.563	0.45391	0.365343
7.54	0.571796	0.437743	0.38519
7.55	0.567569	0.445048	0.394053
7.56	0.572867	0.459444	0.368733
7.57	0.562895	0.451604	0.379558
7.58	0.554867	0.453685	0.388745
7.59	0.51349	0.444133	0.395492
7.6	0.550509	0.44934	0.397386
7.61	0.548807	0.450479	0.429463
7.62	0.495201	0.44625	0.445088
7.63	0.4942	0.424038	0.438595
7.64	0.468806	0.446993	0.415417
7.65	0.50619	0.441318	0.406491
7.66	0.502471	0.459172	0.388452
7.67	0.514926	0.439862	0.375005
7.68	0.555057	0.439723	0.376605
7.69	0.544235	0.452969	0.398556
7.7	0.537021	0.44336	0.406294
7.71	0.506596	0.464903	0.396538
7.72	0.525087	0.468698	0.407873
7.73	0.5078	0.483819	0.364795
7.74	0.50657	0.461711	0.368464
7.75	0.524081	0.455605	0.372132
7.76	0.490425	0.463471	0.401298
7.77	0.513134	0.458811	0.420222
7.78	0.525007	0.444626	0.40176
7.79	0.510394	0.443237	0.392491
7.8	0.522269	0.42403	0.397679
7.81	0.512441	0.449358	0.364492
7.82	0.50182	0.453782	0.379917
7.83	0.535296	0.472459	0.381155
7.84	0.467935	0.471883	0.381884
7.85	0.51598	0.431689	0.384944
7.86	0.501972	0.45788	0.366302
7.87	0.497565	0.431617	0.368196
7.88	0.541607	0.452165	0.364081
7.89	0.506156	0.439386	0.349309
7.9	0.52533	0.446821	0.361027
7.91	0.54578	0.46917	0.328929
7.92	0.55157	0.452827	0.364633
7.93	0.518884	0.456129	0.361314
7.94	0.501887	0.45568	0.371361
7.95	0.504076	0.444679	0.364935
7.96	0.485208	0.454159	0.376764
7.97	0.501576	0.480404	0.374405
7.98	0.527026	0.461296	0.376738
7.99	0.555426	0.465897	0.357702
8	0.583174	0.446297	0.389144
8.01	0.603349	0.471258	0.368234
8.02	0.577196	0.431841	0.386357
8.03	0.626304	0.398449	0.417901
8.04	0.629777	0.407512	0.412616
8.05	0.61815	0.436109	0.389709
8.06	0.606958	0.439765	0.368257
8.07	0.582552	0.464239	0.375859
8.08	0.565264	0.451476	0.383856
8.09	0.567349	0.446208	0.378763
8.1	0.570317	0.455918	0.367496
8.11	0.594494	0.444304	0.382327
8.12	0.576543	0.465032	0.423048
8.13	0.612401	0.450288	0.4075
8.14	0.586542	0.442606	0.411217
8.15	0.56669	0.43467	0.38415
8.16	0.556484	0.444946	0.377292
8.17	0.569268	0.450687	0.358042
8.18	0.553686	0.448188	0.367081
8.19	0.555495	0.456903	0.365159
8.2	0.518461	0.443389	0.377656
8.21	0.502741	0.459993	0.338226
8.22	0.482722	0.456092	0.30959
8.23	0.493461	0.442434	0.34968
8.24	0.49847	0.455564	0.338842
8.25	0.515744	0.452844	0.331765
8.26	0.499711	0.459809	0.313099
8.27	0.56341	0.446762	0.326377
8.28	0.531354	0.43257	0.327286
8.29	0.519217	0.452536	0.316058
8.3	0.555283	0.453012	0.306778
8.31	0.593036	0.453493	0.31454
8.32	0.614363	0.4583	0.314156
8.33	0.562329	0.465409	0.312714
8.34	0.530129	0.471275	0.306108
8.35	0.535517	0.468194	0.293291
8.36	0.55472	0.450601	0.282749
8.37	0.556585	0.461848	0.290139
8.38	0.557292	0.440546	0.275667
8.39	0.56158	0.444066	0.294071
8.4	0.579123	0.455115	0.289127
8.41	0.604595	0.422308	0.262965
8.42	0.605783	0.448366	0.287768
8.43	0.573896	0.443123	0.267594
8.44	0.55383	0.46511	0.275081
8.45	0.603701	0.447659	0.268271
8.46	0.543256	0.464307	0.278315
8.47	0.586817	0.456511	0.289276
8.48	0.57987	0.439677	0.298938
8.49	0.595554	0.442029	0.29978
8.5	0.600965	0.433762	0.295583
8.51	0.568476	0.447972	0.279754
8.52	0.587121	0.436416	0.326107
8.53	0.588296	0.445186	0.327794
8.54	0.578534	0.451932	0.334691
8.55	0.627054	0.454362	0.330663
8.56	0.644621	0.452427	0.313027
8.57	0.653642	0.469645	0.305217
8.58	0.640949	0.484776	0.299635
8.59	0.638905	0.466593	0.309414
8.6	0.605334	0.467893	0.289447
8.61	0.614269	0.450348	0.290032
8.62	0.618843	0.43004	0.279329
8.63	0.626794	0.41021	0.27967
8.64	0.631619	0.438472	0.290378
8.65	0.676249	0.426156	0.314494
8.66	0.680143	0.39884	0.297198
8.67	0.669825	0.425706	0.302422
8.68	0.672402	0.427666	0.31589
8.69	0.674342	0.394686	0.323889
8.7	0.677048	0.417578	0.317591
8.71	0.598612	0.422196	0.305053
8.72	0.602328	0.419845	0.332742
8.73	0.581327	0.421539	0.321897
8.74	0.550875	0.436336	0.335557
8.75	0.565026	0.456157	0.331742
8.76	0.555143	0.448042	0.313553
8.77	0.565282	0.464366	0.330753
8.78	0.523801	0.451612	0.334247
8.79	0.557424	0.444701	0.363881
8.8	0.557635	0.446877	0.365069
8.81	0.528808	0.465526	0.360507
8.82	0.559019	0.470802	0.359997
8.83	0.516034	0.45236	0.356882
8.84	0.513646	0.435318	0.355353
8.85	0.504787	0.428296	0.370797
8.86	0.494592	0.437983	0.361748
8.87	0.483932	0.444835	0.364933
8.88	0.521228	0.445929	0.360646
8.89	0.491946	0.467341	0.399744
8.9	0.509035	0.436868	0.38373
8.91	0.561803	0.46372	0.401235
8.92	0.532251	0.453453	0.40613
8.93	0.535817	0.449481	0.406635
8.94	0.542451	0.463684	0.390445
8.95	0.551437	0.442233	0.414493
8.96	0.535642	0.437995	0.419527
8.97	0.521377	0.453651	0.403691
8.98	0.511922	0.484581	0.447876
8.99	0.536767	0.492029	0.460511
9	0.499222	0.4616	0.442228
9.01	0.490502	0.450827	0.424664
9.02	0.507773	0.471235	0.438214
9.03	0.519358	0.454191	0.449157
9.04	0.489201	0.429461	0.469636
9.05	0.513071	0.445755	0.458898
9.06	0.533479	0.466686	0.491521
9.07	0.549141	0.475338	0.492537
9.08	0.535133	0.4529	0.475755
9.09	0.522063	0.468125	0.47154
9.1	0.535499	0.42013	0.447195
9.11	0.555571	0.436013	0.437087
9.12	0.550671	0.425387	0.437931
9.13	0.561028	0.450729	0.427497
9.14	0.575126	0.443857	0.429389
9.15	0.604976	0.440156	0.413078
9.16	0.580141	0.454125	0.406206
9.17	0.581334	0.447392	0.418244
9.18	0.607048	0.44912	0.43831
9.19	0.608664	0.468706	0.449925
9.2	0.627099	0.470696	0.383022
9.21	0.632295	0.455831	0.397434
9.22	0.607958	0.440233	0.423742
9.23	0.610308	0.471114	0.438078
9.24	0.608523	0.455176	0.420755
9.25	0.616289	0.468127	0.441493
9.26	0.614264	0.455432	0.439359
9.27	0.610558	0.451172	0.395182
9.28	0.61475	0.474082	0.402495
9.29	0.576533	0.44388	0.414487
9.3	0.572069	0.454439	0.383918
9.31	0.606017	0.450166	0.368702
9.32	0.596486	0.49513	0.368972
9.33	0.593696	0.502825	0.397149
9.34	0.611274	0.474544	0.405605
9.35	0.621893	0.447368	0.401521
9.36	0.610418	0.481032	0.415268
9.37	0.620332	0.462316	0.404074
9.38	0.593391	0.459947	0.422306
9.39	0.565308	0.487255	0.417715
9.4	0.577935	0.456946	0.42839
9.41	0.604172	0.44462	0.393294
9.42	0.635423	0.488885	0.402544
9.43	0.663037	0.493264	0.420751
9.44	0.625747	0.500622	0.412678
9.45	0.629389	0.485801	0.437621
9.46	0.637841	0.482098	0.465121
9.47	0.648249	0.489482	0.467681
9.48	0.697541	0.520893	0.444507
9.49	0.663987	0.491335	0.406705
9.5	0.662195	0.479739	0.418299
9.51	0.659063	0.46866	0.424733
9.52	0.648275	0.464902	0.427099
9.53	0.650095	0.47804	0.458232
9.54	0.632334	0.492971	0.441547
9.55	0.681403	0.469832	0.423953
9.56	0.656368	0.474651	0.443453
9.57	0.640814	0.476393	0.426869
9.58	0.633828	0.47427	0.430799
9.59	0.644707	0.497548	0.387943
9.6	0.659364	0.483577	0.389595
9.61	0.65282	0.500688	0.412126
9.62	0.623348	0.512588	0.404196
9.63	0.661357	0.466372	0.408875
9.64	0.668412	0.474854	0.392711
9.65	0.676135	0.479807	0.365077
9.66	0.648249	0.479337	0.35409
9.67	0.655723	0.464553	0.363697
9.68	0.63659	0.474969	0.336656
9.69	0.636158	0.476251	0.309592
9.7	0.621614	0.489149	0.32059
9.71	0.634661	0.469913	0.333153
9.72	0.656055	0.447843	0.329682
9.73	0.66761	0.471426	0.337522
9.74	0.621735	0.455722	0.332767
9.75	0.595781	0.446237	0.325072
9.76	0.606824	0.471142	0.325841
9.77	0.588128	0.471983	0.334632
9.78	0.55961	0.453892	0.353135
9.79	0.551751	0.429794	0.316787
9.8	0.576684	0.415581	0.309728
9.81	0.579343	0.430599	0.315969
9.82	0.574605	0.432675	0.310754
9.83	0.626966	0.463735	0.326465
9.84	0.632769	0.460809	0.320473
9.85	0.621064	0.438267	0.343054
9.86	0.631018	0.433343	0.33289
9.87	0.62397	0.469185	0.317245
9.88	0.586778	0.436933	0.311468
9.89	0.580323	0.45867	0.315959
9.9	0.574121	0.453703	0.320173
9.91	0.585921	0.443743	0.310917
9.92	0.593	0.465001	0.300347
9.93	0.591191	0.467073	0.308777
9.94	0.601183	0.497147	0.308137
9.95	0.595611	0.468806	0.331273
9.96	0.597683	0.467153	0.375063
9.97	0.591069	0.464827	0.400383
9.98	0.630872	0.442581	0.378932
9.99	0.600722	0.472722	0.374413
10	0.641975	0.477416	0.40346
10.01	0.646727	0.48825	0.439799
10.02	0.656074	0.487146	0.404737
10.03	0.644636	0.477526	0.430727
10.04	0.635782	0.462523	0.395513
10.05	0.672054	0.462564	0.380904
10.06	0.666671	0.476753	0.398022
10.07	0.65794	0.489015	0.401552
10.08	0.657411	0.479986	0.389507
10.09	0.673716	0.445023	0.376004
10.1	0.668019	0.481416	0.390065
10.11	0.665751	0.462967	0.407442
10.12	0.682545	0.451268	0.391796
10.13	0.667837	0.461859	0.403864
10.14	0.64188	0.471441	0.403967
10.15	0.642566	0.451597	0.370054
10.16	0.647673	0.43993	0.358026
10.17	0.647905	0.434176	0.34188
10.18	0.62127	0.460069	0.336057
10.19	0.603027	0.476852	0.361173
10.2	0.600333	0.480587	0.346795
10.21	0.605336	0.481619	0.32291
10.22	0.610091	0.469033	0.343328
10.23	0.612514	0.481046	0.339355
10.24	0.630422	0.46118	0.328924
10.25	0.630329	0.460255	0.326733
10.26	0.628486	0.46404	0.33117
10.27	0.597006	0.44864	0.318258
10.28	0.603402	0.441892	0.326803
10.29	0.649705	0.457642	0.356565
10.3	0.642119	0.444736	0.350281
10.31	0.637508	0.44416	0.376238
10.32	0.63871	0.446686	0.380709
10.33	0.680746	0.431236	0.378862
10.34	0.702624	0.429721	0.379166
10.35	0.696838	0.434329	0.406563
10.36	0.688469	0.445832	0.392447
10.37	0.68325	0.406542	0.383955
10.38	0.671669	0.41771	0.373737
10.39	0.678712	0.415147	0.365115
10.4	0.681208	0.424843	0.360961
10.41	0.647882	0.399659	0.372551
10.42	0.629538	0.404915	0.364717
10.43	0.619657	0.408377	0.359922
10.44	0.596869	0.411662	0.370979
10.45	0.631783	0.424462	0.382104
10.46	0.593481	0.412654	0.372171
10.47	0.570784	0.399737	0.345107
10.48	0.624243	0.381831	0.357135
10.49	0.569592	0.416916	0.378955
10.5	0.614965	0.407213	0.388701
10.51	0.579892	0.411896	0.376318
10.52	0.59544	0.400131	0.378915
10.53	0.601826	0.40857	0.374259
10.54	0.622495	0.40661	0.340617
10.55	0.620534	0.418529	0.355753
10.56	0.596658	0.42209	0.330337
10.57	0.60195	0.417381	0.37477
10.58	0.626842	0.453178	0.349355
10.59	0.603325	0.422836	0.31046
10.6	0.62602	0.424004	0.338783
10.61	0.605644	0.43002	0.311983
10.62	0.618783	0.406209	0.349703
10.63	0.602488	0.460755	0.346322
10.64	0.617242	0.455252	0.3316
10.65	0.615683	0.44657	0.334759
10.66	0.615851	0.437886	0.342789
10.67	0.595344	0.449589	0.369346
10.68	0.577177	0.475635	0.352771
10.69	0.60997	0.468775	0.375979
10.7	0.599985	0.443482	0.373312
10.71	0.570406	0.432349	0.403418
10.72	0.550255	0.44551	0.383282
10.73	0.539436	0.476038	0.370046
10.74	0.551542	0.460033	0.362865
10.75	0.544748	0.473038	0.369215
10.76	0.561202	0.475926	0.369905
10.77	0.551623	0.463405	0.387319
10.78	0.545917	0.471147	0.404289
10.79	0.521677	0.473188	0.398516
10.8	0.499758	0.464518	0.370141
10.81	0.52928	0.461704	0.39919
10.82	0.522372	0.459296	0.322669
10.83	0.487001	0.448721	0.397405
10.84	0.484532	0.44704	0.390567
10.85	0.514161	0.472581	0.393827
10.86	0.509507	0.463465	0.373105
10.87	0.523855	0.453102	0.373852
10.88	0.546966	0.457292	0.363715
10.89	0.565852	0.453866	0.371695
10.9	0.548312	0.448793	0.362034
10.91	0.583835	0.416719	0.356845
10.92	0.583641	0.441339	0.36153
10.93	0.566243	0.46232	0.387636
10.94	0.585265	0.463504	0.370537
10.95	0.572749	0.459061	0.370796
10.96	0.571325	0.465495	0.350638
10.97	0.588174	0.465494	0.374772
10.98	0.568784	0.464556	0.355616
10.99	0.546989	0.433531	0.354578
11	0.546827	0.434935	0.371408
11.01	0.531773	0.436199	0.396724
11.02	0.550417	0.425187	0.388184
11.03	0.520918	0.414775	0.420913
11.04	0.551254	0.424248	0.411992
11.05	0.565182	0.444193	0.424157
11.06	0.559551	0.422614	0.394293
11.07	0.582487	0.391251	0.409845
11.08	0.582254	0.380432	0.434552
11.09	0.556807	0.360117	0.412591
11.1	0.592453	0.389856	0.417973
11.11	0.578649	0.383015	0.419352
11.12	0.572898	0.381527	0.416258
11.13	0.592089	0.415246	0.425012
11.14	0.572988	0.430433	0.448425
11.15	0.570994	0.428984	0.418424
11.16	0.607417	0.428751	0.431692
11.17	0.621855	0.416866	0.47123
11.18	0.601968	0.434208	0.459818
11.19	0.567146	0.458317	0.446772
11.2	0.603275	0.448746	0.457442
11.21	0.58595	0.445357	0.427509
11.22	0.598835	0.436829	0.442731
11.23	0.618773	0.441721	0.441888
11.24	0.582595	0.441896	0.411
11.25	0.57533	0.4367	0.419351
11.26	0.569967	0.428645	0.427025
11.27	0.562508	0.417701	0.396456
11.28	0.574216	0.446713	0.400217
11.29	0.598344	0.423434	0.391572
11.3	0.632869	0.438528	0.394894
11.31	0.608379	0.408109	0.360146
11.32	0.580586	0.441447	0.369597
11.33	0.613493	0.452038	0.380267
11.34	0.581948	0.407278	0.413022
11.35	0.568828	0.446814	0.391985
11.36	0.563079	0.459025	0.415147
11.37	0.584023	0.430094	0.389827
11.38	0.573838	0.425788	0.397754
11.39	0.558124	0.435385	0.4372
11.4	0.584686	0.431988	0.405359
11.41	0.579305	0.432386	0.394053
11.42	0.573659	0.453534	0.379387
11.43	0.551474	0.446941	0.367961
11.44	0.569677	0.458844	0.372714
11.45	0.541634	0.444162	0.383533
11.46	0.561495	0.461795	0.3695
11.47	0.530557	0.414627	0.373945
11.48	0.545886	0.44066	0.360168
11.49	0.538374	0.459486	0.37933
11.5	0.545443	0.462948	0.371837
11.51	0.540493	0.475981	0.396826
11.52	0.524852	0.44683	0.43564
11.53	0.526231	0.464114	0.418367
11.54	0.539106	0.442942	0.456564
11.55	0.531494	0.451604	0.453398
11.56	0.533637	0.446908	0.466038
11.57	0.541541	0.474893	0.445762
11.58	0.529606	0.455168	0.452058
11.59	0.53372	0.439271	0.452421
11.6	0.529918	0.451081	0.502175
11.61	0.554807	0.470247	0.474782
11.62	0.571252	0.471406	0.497295
11.63	0.603608	0.461036	0.452292
11.64	0.574151	0.465151	0.459366
11.65	0.564796	0.441597	0.479436
11.66	0.587866	0.453546	0.503745
11.67	0.593274	0.449477	0.503849
11.68	0.60249	0.443621	0.486675
11.69	0.593949	0.440276	0.505754
11.7	0.574714	0.459022	0.485347
11.71	0.580864	0.450041	0.474608
11.72	0.59664	0.437078	0.49649
11.73	0.60118	0.426482	0.501881
11.74	0.589487	0.441439	0.489032
11.75	0.587829	0.437339	0.504714
11.76	0.588012	0.457089	0.500965
11.77	0.607972	0.479847	0.476596
11.78	0.599021	0.475433	0.518802
11.79	0.602839	0.463179	0.495549
11.8	0.582455	0.470483	0.481129
11.81	0.58745	0.458122	0.491092
11.82	0.572724	0.479781	0.490845
11.83	0.597406	0.445247	0.499742
11.84	0.57427	0.455667	0.530753
11.85	0.565116	0.463883	0.472249
11.86	0.571686	0.440098	0.497215
11.87	0.570761	0.451025	0.489986
11.88	0.576573	0.472879	0.46844
11.89	0.564071	0.444935	0.495246
11.9	0.58041	0.440883	0.499008
11.91	0.584399	0.438388	0.472616
11.92	0.605941	0.445175	0.470888
11.93	0.559096	0.442567	0.469682
11.94	0.597319	0.453251	0.483542
11.95	0.614948	0.4424	0.479352
11.96	0.628704	0.444699	0.476434
11.97	0.645483	0.452237	0.480437
11.98	0.610708	0.444718	0.483995
11.99	0.617489	0.454344	0.471682
12	0.59024	0.465796	0.480969
12.01	0.587647	0.435926	0.471625
12.02	0.609637	0.441248	0.472819
12.03	0.603846	0.448919	0.453223
12.04	0.617952	0.465858	0.454169
12.05	0.59812	0.478094	0.452963
12.06	0.564225	0.467099	0.458295
12.07	0.571806	0.469631	0.487405
12.08	0.575121	0.469926	0.485009
12.09	0.580207	0.474606	0.452006
12.1	0.562485	0.477395	0.409928
12.11	0.573825	0.476797	0.41849
12.12	0.597931	0.474468	0.407948
12.13	0.564214	0.484396	0.43462
12.14	0.574203	0.506608	0.412923
12.15	0.564707	0.517407	0.406039
12.16	0.581782	0.497164	0.44357
12.17	0.57593	0.501872	0.439411
12.18	0.592709	0.5245	0.439527
12.19	0.583391	0.506946	0.43385
12.2	0.568787	0.475918	0.426719
12.21	0.59056	0.475548	0.443691
12.22	0.568589	0.462468	0.491204
12.23	0.612935	0.465846	0.471865
12.24	0.588546	0.47571	0.483625
12.25	0.546179	0.461825	0.517169
12.26	0.569149	0.4606	0.518308
12.27	0.543373	0.464879	0.486769
12.28	0.552135	0.464645	0.500389
12.29	0.558624	0.460027	0.508428
12.3	0.552074	0.471624	0.519871
12.31	0.545834	0.455941	0.539857
12.32	0.564867	0.455828	0.546012
12.33	0.552585	0.463317	0.549212
12.34	0.563031	0.4444	0.519494
12.35	0.595391	0.470772	0.537632
12.36	0.599285	0.459656	0.54737
12.37	0.58317	0.459794	0.532707
12.38	0.57133	0.452956	0.505791
12.39	0.563831	0.429624	0.511121
12.4	0.573736	0.469669	0.521163
12.41	0.582357	0.458105	0.546397
12.42	0.562416	0.456989	0.560698
12.43	0.586998	0.44831	0.533214
12.44	0.560908	0.462792	0.530914
12.45	0.568676	0.471102	0.545329
12.46	0.571275	0.455914	0.516058
12.47	0.540056	0.468169	0.470896
12.48	0.568695	0.448293	0.490829
12.49	0.527129	0.450366	0.467849
12.5	0.562659	0.449847	0.434495
12.51	0.56292	0.461027	0.446168
12.52	0.55858	0.461886	0.478986
12.53	0.557619	0.46348	0.469707
12.54	0.552818	0.468073	0.462419
12.55	0.576863	0.467661	0.433756
12.56	0.589611	0.466066	0.443723
12.57	0.588835	0.458769	0.4541
12.58	0.553756	0.463071	0.441012
12.59	0.552442	0.461633	0.452678
12.6	0.549952	0.437401	0.444095
12.61	0.593385	0.436749	0.414354
12.62	0.548064	0.444432	0.420163
12.63	0.57316	0.433338	0.455794
12.64	0.578503	0.444342	0.427871
12.65	0.589623	0.414009	0.417247
12.66	0.607057	0.429889	0.43435
12.67	0.607743	0.417431	0.424805
12.68	0.62674	0.431778	0.417025
12.69	0.615109	0.40405	0.42171
12.7	0.611427	0.409363	0.423982
12.71	0.601797	0.417724	0.440657
12.72	0.620276	0.429128	0.417158
12.73	0.619035	0.428914	0.416366
12.74	0.605859	0.436474	0.439403
12.75	0.597963	0.450584	0.460751
12.76	0.599827	0.440951	0.468857
12.77	0.60552	0.437609	0.469192
12.78	0.60105	0.442602	0.454483
12.79	0.607651	0.472942	0.439458
12.8	0.582309	0.425752	0.45018
12.81	0.617224	0.445026	0.466861
12.82	0.573591	0.420467	0.43748
12.83	0.581572	0.433676	0.465545
12.84	0.567246	0.401326	0.474473
12.85	0.596256	0.398311	0.444672
12.86	0.581434	0.416549	0.448056
12.87	0.597888	0.418225	0.426181
12.88	0.586062	0.42184	0.425629
12.89	0.585933	0.44563	0.420928
12.9	0.582681	0.43136	0.41168
12.91	0.579753	0.458719	0.43166
12.92	0.616474	0.430671	0.435515
12.93	0.595231	0.425644	0.438553
12.94	0.590433	0.440913	0.419585
12.95	0.59514	0.467117	0.407813
12.96	0.6033	0.471918	0.400085
12.97	0.59615	0.464264	0.403809
12.98	0.577897	0.479139	0.400152
12.99	0.595649	0.476536	0.407974
13	0.614612	0.457004	0.421516
13.01	0.611915	0.437502	0.42632
13.02	0.58324	0.452313	0.416095
13.03	0.600143	0.472319	0.407028
13.04	0.584186	0.468531	0.421041
13.05	0.563469	0.484857	0.40591
13.06	0.535508	0.503645	0.398409
13.07	0.540282	0.469313	0.404951
13.08	0.578935	0.451322	0.422503
13.09	0.589329	0.458869	0.445857
13.1	0.601443	0.463676	0.409901
13.11	0.649845	0.471129	0.427458
13.12	0.626399	0.468513	0.433599
13.13	0.61986	0.438016	0.429998
13.14	0.667433	0.45721	0.414768
13.15	0.655873	0.420718	0.41072
13.16	0.668268	0.411099	0.401787
13.17	0.671481	0.441837	0.424359
13.18	0.656269	0.456736	0.416903
13.19	0.640715	0.463145	0.389649
13.2	0.65485	0.441016	0.388383
13.21	0.630863	0.43197	0.411704
13.22	0.648515	0.458248	0.39634
13.23	0.650657	0.461909	0.396696
13.24	0.677524	0.45307	0.377929
13.25	0.653748	0.463688	0.404469
13.26	0.677313	0.450474	0.407367
13.27	0.677448	0.458152	0.369522
13.28	0.678498	0.466943	0.365705
13.29	0.675898	0.453112	0.379611
13.3	0.690651	0.455461	0.371571
13.31	0.693208	0.485988	0.387522
13.32	0.66161	0.46937	0.393882
13.33	0.67338	0.495477	0.381695
13.34	0.684918	0.494213	0.37955
13.35	0.679396	0.490009	0.383826
13.36	0.686632	0.495468	0.398235
13.37	0.688642	0.487271	0.421155
13.38	0.674472	0.469978	0.420583
13.39	0.655151	0.484826	0.436945
13.4	0.660118	0.481638	0.435069
13.41	0.641201	0.488933	0.451879
13.42	0.647955	0.469884	0.457698
13.43	0.680155	0.497195	0.461077
13.44	0.682366	0.477884	0.446826
13.45	0.661395	0.491171	0.45397
13.46	0.69205	0.492327	0.473899
13.47	0.675891	0.491474	0.478986
13.48	0.649433	0.483676	0.49303
13.49	0.658966	0.498428	0.473335
13.5	0.654029	0.530899	0.463593
13.51	0.668255	0.487272	0.469111
13.52	0.674393	0.505774	0.455096
13.53	0.692338	0.504174	0.440184
13.54	0.679818	0.510576	0.468219
13.55	0.683275	0.504316	0.437278
13.56	0.676653	0.493801	0.444423
13.57	0.676229	0.491003	0.437043
13.58	0.65627	0.497257	0.420348
13.59	0.629756	0.496523	0.433457
13.6	0.647449	0.500461	0.422494
13.61	0.665114	0.504114	0.425245
13.62	0.609378	0.518117	0.457908
13.63	0.628722	0.509721	0.444479
13.64	0.662778	0.502079	0.445475
13.65	0.666389	0.505994	0.474896
13.66	0.664771	0.48967	0.455423
13.67	0.665552	0.514964	0.461651
13.68	0.652833	0.526519	0.484933
13.69	0.653712	0.518466	0.464091
13.7	0.642237	0.490433	0.493725
13.71	0.671052	0.512627	0.495353
13.72	0.682763	0.498375	0.487966
13.73	0.669628	0.508609	0.515009
13.74	0.66507	0.503151	0.493923
13.75	0.653906	0.489259	0.491587
13.76	0.643187	0.502881	0.477847
13.77	0.667837	0.497772	0.465006
13.78	0.671539	0.522164	0.463382
13.79	0.686501	0.544558	0.475741
13.8	0.699097	0.53109	0.47653
13.81	0.680437	0.500065	0.469608
13.82	0.669628	0.515479	0.475323
13.83	0.672445	0.498107	0.499733
13.84	0.707255	0.46926	0.521105
13.85	0.723922	0.445009	0.50751
13.86	0.697684	0.435489	0.503571
13.87	0.717933	0.398475	0.527179
13.88	0.690631	0.398086	0.551616
13.89	0.705376	0.385551	0.55694
13.9	0.646653	0.367042	0.550685
13.91	0.656246	0.368155	0.551828
13.92	0.647546	0.344862	0.557123
13.93	0.634358	0.3369	0.543614
13.94	0.62558	0.366791	0.546466
13.95	0.605434	0.388286	0.57068
13.96	0.63553	0.36898	0.524876
13.97	0.630427	0.330877	0.487038
13.98	0.601106	0.343364	0.513189
13.99	0.618316	0.355353	0.520565
14	0.633985	0.358878	0.554311
14.01	0.58545	0.370747	0.536937
14.02	0.59956	0.349784	0.515328
14.03	0.607713	0.357654	0.495211
14.04	0.580645	0.377009	0.476677
14.05	0.601151	0.36865	0.499085
14.06	0.643317	0.36979	0.488605
14.07	0.611938	0.368565	0.490885
14.08	0.614667	0.354651	0.503366
14.09	0.604056	0.375861	0.524468
14.1	0.610777	0.356074	0.501719
14.11	0.611155	0.34383	0.490317
14.12	0.605296	0.342101	0.480002
14.13	0.623566	0.34477	0.503154
14.14	0.631977	0.355435	0.485313
14.15	0.58409	0.364023	0.523132
14.16	0.555698	0.357244	0.544631
14.17	0.601486	0.336264	0.521726
14.18	0.591651	0.365608	0.524316
14.19	0.586017	0.362249	0.513531
14.2	0.575379	0.381917	0.529541
14.21	0.576098	0.37575	0.520986
14.22	0.576067	0.376932	0.513399
14.23	0.590503	0.386109	0.512148
14.24	0.582106	0.373773	0.523287
14.25	0.595074	0.363915	0.520966
14.26	0.591252	0.351739	0.51726
14.27	0.584053	0.352066	0.521605
14.28	0.612541	0.367543	0.502462
14.29	0.607882	0.387514	0.488864
14.3	0.622439	0.373864	0.492145
14.31	0.663763	0.358287	0.511559
14.32	0.677657	0.3655	0.524813
14.33	0.634555	0.36173	0.511423
14.34	0.645185	0.360531	0.513254
14.35	0.64618	0.353858	0.517562
14.36	0.649674	0.346389	0.521319
14.37	0.642514	0.361226	0.517466
14.38	0.63745	0.378273	0.508748
14.39	0.627437	0.363177	0.508398
14.4	0.655624	0.372358	0.516269
14.41	0.632562	0.357309	0.526445
14.42	0.63608	0.333798	0.525631
14.43	0.647083	0.346123	0.508799
14.44	0.676343	0.365647	0.484481
14.45	0.656515	0.362262	0.488879
14.46	0.673454	0.371124	0.510235
14.47	0.680827	0.366877	0.505994
14.48	0.637988	0.347717	0.51238
14.49	0.651403	0.38614	0.496138
14.5	0.629181	0.369195	0.530459
14.51	0.627777	0.350114	0.539086
14.52	0.624615	0.348475	0.552306
14.53	0.640932	0.334765	0.573962
14.54	0.626959	0.365971	0.560332
14.55	0.640854	0.392773	0.56558
14.56	0.654233	0.357816	0.572131
14.57	0.662666	0.391753	0.568258
14.58	0.650914	0.377521	0.564357
14.59	0.64026	0.362363	0.586877
14.6	0.6357	0.373491	0.545913
14.61	0.610228	0.360555	0.548673
14.62	0.592027	0.39464	0.570851
14.63	0.631072	0.368714	0.544461
14.64	0.629279	0.361654	0.54953
14.65	0.628174	0.354368	0.56229
14.66	0.635439	0.331957	0.593243
14.67	0.629873	0.327118	0.595351
14.68	0.641451	0.340112	0.579239
14.69	0.622109	0.336035	0.549279
14.7	0.614168	0.346609	0.549234
14.71	0.58843	0.351895	0.53301
14.72	0.640512	0.342545	0.525839
14.73	0.613352	0.372438	0.52797
14.74	0.646709	0.357379	0.539407
14.75	0.651372	0.348874	0.555754
14.76	0.621932	0.373139	0.553643
14.77	0.654613	0.342176	0.573987
14.78	0.627312	0.341745	0.601642
14.79	0.641804	0.37209	0.621716
14.8	0.633423	0.392898	0.553475
14.81	0.625204	0.387863	0.615183
14.82	0.631124	0.3766	0.6006
14.83	0.66335	0.37825	0.579978
14.84	0.66927	0.358417	0.587464
14.85	0.695401	0.319864	0.583039
14.86	0.665064	0.342006	0.587967
14.87	0.676935	0.306542	0.573735
14.88	0.703886	0.336627	0.593451
14.89	0.683335	0.320963	0.598648
14.9	0.696981	0.338935	0.592491
14.91	0.687398	0.355568	0.591801
14.92	0.664239	0.373248	0.597143
14.93	0.699254	0.404595	0.59063
14.94	0.718607	0.398482	0.60217
14.95	0.673806	0.376214	0.59226
14.96	0.663374	0.387387	0.579613
14.97	0.661426	0.395286	0.56824
14.98	0.620862	0.389299	0.552869
14.99	0.658142	0.390254	0.602175
15	0.608819	0.384377	0.576354
15.01	0.612352	0.382467	0.596314
15.02	0.61555	0.375163	0.604471
15.03	0.628102	0.451778	0.596815
15.04	0.628475	0.388558	0.621775
15.05	0.613254	0.418614	0.635453
15.06	0.590303	0.422126	0.607488
15.07	0.561766	0.401421	0.629782
15.08	0.532008	0.396284	0.650306
15.09	0.570027	0.375841	0.626105
15.1	0.558646	0.375106	0.6161
15.11	0.578451	0.400261	0.600627
15.12	0.588054	0.445667	0.629638
15.13	0.580008	0.407743	0.649882
15.14	0.554217	0.408838	0.623723
15.15	0.578241	0.440462	0.602428
15.16	0.594553	0.455592	0.624055
15.17	0.59523	0.44266	0.584974
15.18	0.581614	0.412727	0.601899
15.19	0.580431	0.440716	0.593338
15.2	0.543084	0.405985	0.585566
15.21	0.550605	0.41341	0.6031
15.22	0.518625	0.422883	0.589919
15.23	0.502742	0.411384	0.596532
15.24	0.506404	0.381026	0.619037
15.25	0.491934	0.378583	0.610926
15.26	0.523899	0.363614	0.590033
15.27	0.537336	0.358808	0.608021
15.28	0.563397	0.383039	0.639654
15.29	0.585562	0.374868	0.619077
15.3	0.565625	0.356351	0.618444
15.31	0.567383	0.340106	0.610741
15.32	0.491804	0.362836	0.641127
15.33	0.521526	0.358461	0.636627
15.34	0.534859	0.343553	0.619336
15.35	0.558869	0.354034	0.612459
15.36	0.575381	0.34921	0.609089
15.37	0.567872	0.366169	0.610314
15.38	0.613209	0.350231	0.612267
15.39	0.576495	0.342039	0.623122
15.4	0.563794	0.372793	0.611644
15.41	0.560564	0.338836	0.607289
15.42	0.564166	0.340268	0.589398
15.43	0.559111	0.346605	0.626889
15.44	0.502266	0.354047	0.633771
15.45	0.535062	0.366399	0.649271
15.46	0.51901	0.363187	0.615977
15.47	0.535867	0.367721	0.610025
15.48	0.568624	0.355782	0.629174
15.49	0.55444	0.304766	0.625227
15.5	0.552095	0.321408	0.623357
15.51	0.556754	0.327346	0.629654
15.52	0.560035	0.332905	0.633194
15.53	0.5625	0.317006	0.620373
15.54	0.565266	0.310209	0.612319
15.55	0.567	0.33093	0.624907
15.56	0.595047	0.341967	0.622463
15.57	0.607703	0.33858	0.591841
15.58	0.595852	0.358189	0.606395
15.59	0.630954	0.337412	0.61909
15.6	0.591583	0.350772	0.639506
15.61	0.595949	0.351231	0.647902
15.62	0.628538	0.323006	0.650168
15.63	0.604496	0.356733	0.650945
15.64	0.605604	0.342199	0.638393
15.65	0.603161	0.340307	0.652699
15.66	0.594617	0.326371	0.64273
15.67	0.596435	0.33181	0.650932
15.68	0.634388	0.332502	0.650915
15.69	0.623544	0.344396	0.662451
15.7	0.595747	0.336241	0.679743
15.71	0.589751	0.334963	0.646406
15.72	0.605383	0.344717	0.647632
15.73	0.611136	0.337823	0.628668
15.74	0.56734	0.33221	0.623475
15.75	0.591237	0.356029	0.608016
15.76	0.619383	0.333259	0.635272
15.77	0.613904	0.334391	0.603515
15.78	0.635852	0.319808	0.603628
15.79	0.616344	0.326174	0.622998
15.8	0.646238	0.349963	0.6341
15.81	0.596397	0.332104	0.608857
15.82	0.612181	0.324788	0.637839
15.83	0.618215	0.366774	0.607342
15.84	0.579978	0.337532	0.607518
15.85	0.556495	0.335035	0.629339
15.86	0.575836	0.358088	0.627436
15.87	0.578653	0.330718	0.642804
15.88	0.562098	0.325777	0.635986
15.89	0.548945	0.360296	0.649254
15.9	0.525675	0.339991	0.650371
15.91	0.558013	0.341325	0.648319
15.92	0.536356	0.341976	0.64983
15.93	0.559436	0.345886	0.641054
15.94	0.546471	0.336539	0.630413
15.95	0.537639	0.331931	0.641112
15.96	0.551483	0.331987	0.647981
15.97	0.490997	0.312062	0.63626
15.98	0.524378	0.31208	0.645513
15.99	0.52326	0.368587	0.612009
16	0.506552	0.364887	0.626858
16.01	0.518566	0.372588	0.649363
16.02	0.507718	0.381271	0.662906
16.03	0.459273	0.41674	0.665268
16.04	0.46922	0.381732	0.679605
16.05	0.482928	0.355555	0.652244
16.06	0.468498	0.343162	0.662662
16.07	0.494333	0.384339	0.653734
16.08	0.475882	0.384457	0.660347
16.09	0.443663	0.373045	0.627102
16.1	0.453306	0.372929	0.622134
16.11	0.46657	0.353152	0.656895
16.12	0.457673	0.352073	0.671354
16.13	0.492598	0.34457	0.663975
16.14	0.498529	0.35465	0.639816
16.15	0.493086	0.346604	0.61266
16.16	0.49578	0.375263	0.619395
16.17	0.495495	0.366176	0.629154
16.18	0.5145	0.352049	0.619372
16.19	0.471213	0.346576	0.64055
16.2	0.518426	0.351824	0.672434
16.21	0.540897	0.35983	0.677685
16.22	0.530161	0.361502	0.665448
16.23	0.510759	0.36393	0.647356
16.24	0.473039	0.362106	0.651221
16.25	0.475462	0.333667	0.654456
16.26	0.460724	0.336912	0.656159
16.27	0.466768	0.356045	0.612159
16.28	0.478455	0.349322	0.620112
16.29	0.453672	0.353212	0.608556
16.3	0.483918	0.320371	0.634662
16.31	0.484563	0.318743	0.643266
16.32	0.478335	0.32901	0.632849
16.33	0.493911	0.323597	0.63462
16.34	0.489979	0.298622	0.66005
16.35	0.518631	0.350411	0.694365
16.36	0.523182	0.364179	0.698173
16.37	0.516872	0.320219	0.670025
16.38	0.521692	0.339585	0.671238
16.39	0.514575	0.348118	0.673683
16.4	0.479928	0.33446	0.673123
16.41	0.509517	0.344934	0.650455
16.42	0.506785	0.372536	0.668647
16.43	0.532853	0.374371	0.637717
16.44	0.515477	0.341438	0.653235
16.45	0.486248	0.320901	0.660906
16.46	0.469961	0.360895	0.648205
16.47	0.484039	0.354708	0.675468
16.48	0.494281	0.339163	0.637184
16.49	0.496295	0.348581	0.635664
16.5	0.47084	0.337985	0.64772
16.51	0.489351	0.320674	0.636448
16.52	0.517883	0.329367	0.649355
16.53	0.522886	0.346208	0.627709
16.54	0.546918	0.321576	0.640741
16.55	0.540216	0.31485	0.634395
16.56	0.524518	0.334651	0.633765
16.57	0.518624	0.335218	0.630289
16.58	0.533632	0.320983	0.634599
16.59	0.523048	0.304497	0.629344
16.6	0.520417	0.315705	0.626339
16.61	0.501799	0.319254	0.65054
16.62	0.511315	0.35635	0.671564
16.63	0.515577	0.345028	0.65268
16.64	0.52088	0.382045	0.676796
16.65	0.555781	0.416714	0.659216
16.66	0.532271	0.34098	0.666522
16.67	0.523395	0.322022	0.652413
16.68	0.542757	0.332242	0.631507
16.69	0.538244	0.35544	0.632794
16.7	0.534767	0.368336	0.617749
16.71	0.552633	0.372242	0.622961
16.72	0.554054	0.338484	0.64332
16.73	0.558513	0.400241	0.646831
16.74	0.544843	0.373987	0.639123
16.75	0.53029	0.377604	0.645904
16.76	0.539499	0.384774	0.647297
16.77	0.530099	0.379474	0.652143
16.78	0.520474	0.361587	0.635685
16.79	0.539971	0.356558	0.614106
16.8	0.500744	0.404338	0.613402
16.81	0.512583	0.418711	0.628668
16.82	0.509189	0.451891	0.631047
16.83	0.490328	0.464465	0.633099
16.84	0.487403	0.448611	0.64312
16.85	0.479135	0.431982	0.6398
16.86	0.495388	0.435077	0.642632
16.87	0.541717	0.414122	0.643052
16.88	0.54891	0.446911	0.665229
16.89	0.578801	0.423554	0.639913
16.9	0.562278	0.410659	0.628931
16.91	0.547748	0.404706	0.61706
16.92	0.546683	0.407896	0.614189
16.93	0.572998	0.410884	0.632203
16.94	0.568647	0.426625	0.620833
16.95	0.547147	0.441256	0.623858
16.96	0.544627	0.424494	0.621873
16.97	0.517193	0.43515	0.655366
16.98	0.547342	0.427522	0.638332
16.99	0.53368	0.445227	0.621225
17	0.535957	0.424325	0.630856
17.01	0.566657	0.460991	0.615784
17.02	0.558348	0.473902	0.603271
17.03	0.534997	0.467918	0.618291
17.04	0.515893	0.437469	0.631183
17.05	0.548212	0.418894	0.610544
17.06	0.569084	0.437001	0.625242
17.07	0.566365	0.433623	0.601123
17.08	0.5377	0.435851	0.596214
17.09	0.55746	0.425326	0.568676
17.1	0.516534	0.403172	0.594148
17.11	0.538937	0.373808	0.576593
17.12	0.55794	0.353592	0.550173
17.13	0.575845	0.349905	0.565744
17.14	0.549829	0.360118	0.552504
17.15	0.60902	0.361269	0.562773
17.16	0.563588	0.332727	0.556019
17.17	0.550971	0.323744	0.564578
17.18	0.542883	0.3096	0.578981
17.19	0.579303	0.298169	0.57891
17.2	0.587852	0.312108	0.569697
17.21	0.571777	0.296399	0.576775
17.22	0.574585	0.336283	0.562413
17.23	0.563705	0.337937	0.578357
17.24	0.557574	0.344658	0.589705
17.25	0.534522	0.355126	0.588998
17.26	0.540783	0.375055	0.586672
17.27	0.539758	0.389282	0.576193
17.28	0.572665	0.34915	0.583739
17.29	0.541274	0.356348	0.569981
17.3	0.541616	0.299748	0.579172
17.31	0.554816	0.300611	0.566507
17.32	0.529157	0.306232	0.581104
17.33	0.544427	0.326831	0.582562
17.34	0.524951	0.35121	0.597216
17.35	0.502147	0.366429	0.59928
17.36	0.505994	0.370403	0.591295
17.37	0.491122	0.344686	0.591826
17.38	0.496512	0.344608	0.595142
17.39	0.482102	0.350596	0.584681
17.4	0.484733	0.322945	0.593238
17.41	0.498491	0.333965	0.606665
17.42	0.512869	0.319234	0.600372
17.43	0.504605	0.301176	0.583846
17.44	0.498881	0.318763	0.574936
17.45	0.530194	0.3147	0.575959
17.46	0.536876	0.320265	0.573581
17.47	0.529474	0.316609	0.600038
17.48	0.482679	0.309685	0.589227
17.49	0.464321	0.338096	0.593721
17.5	0.472058	0.33963	0.573356
17.51	0.485897	0.344154	0.547691
17.52	0.462735	0.346948	0.559287
17.53	0.470674	0.343499	0.57459
17.54	0.524321	0.329709	0.567483
17.55	0.502562	0.356975	0.571131
17.56	0.500613	0.331528	0.550657
17.57	0.538313	0.341959	0.569193
17.58	0.529733	0.366508	0.55939
17.59	0.585519	0.366312	0.570676
17.6	0.566233	0.334243	0.558346
17.61	0.547424	0.329058	0.546358
17.62	0.572694	0.351453	0.55508
17.63	0.494486	0.355756	0.55117
17.64	0.545351	0.333858	0.55187
17.65	0.556245	0.349155	0.538977
17.66	0.572732	0.37169	0.54391
17.67	0.597222	0.325196	0.546061
17.68	0.559264	0.347751	0.542997
17.69	0.613838	0.346715	0.547447
17.7	0.620928	0.369833	0.55283
17.71	0.612808	0.361751	0.538976
17.72	0.619547	0.363006	0.559674
17.73	0.588526	0.362139	0.56172
17.74	0.627949	0.357612	0.558405
17.75	0.631598	0.348885	0.544309
17.76	0.648956	0.350282	0.523869
17.77	0.638853	0.348349	0.534267
17.78	0.674167	0.365445	0.535901
17.79	0.654404	0.402547	0.551454
17.8	0.617801	0.381273	0.544182
17.81	0.658411	0.366241	0.532466
17.82	0.63206	0.380864	0.541421
17.83	0.635282	0.374721	0.539053
17.84	0.639498	0.356465	0.526177
17.85	0.635235	0.351214	0.535886
17.86	0.626094	0.35266	0.540477
17.87	0.623796	0.353507	0.548857
17.88	0.598022	0.36676	0.543826
17.89	0.626184	0.335862	0.544922
17.9	0.690737	0.341777	0.569985
17.91	0.658851	0.352708	0.569518
17.92	0.689113	0.363939	0.564258
17.93	0.698538	0.372742	0.565075
17.94	0.689084	0.357979	0.5528
17.95	0.67074	0.369144	0.580794
17.96	0.680226	0.367134	0.566562
17.97	0.692259	0.374092	0.561599
17.98	0.661271	0.381305	0.544099
17.99	0.707204	0.359523	0.543432
18	0.687344	0.36178	0.551727
18.01	0.689429	0.375748	0.552177
18.02	0.640953	0.384917	0.545723
18.03	0.631808	0.377557	0.532729
18.04	0.627627	0.390516	0.570663
18.05	0.667736	0.389749	0.564914
18.06	0.647722	0.370422	0.596917
18.07	0.664894	0.355417	0.565316
18.08	0.677331	0.363036	0.548503
18.09	0.635606	0.333466	0.570699
18.1	0.666841	0.337941	0.567439
18.11	0.638742	0.307779	0.560561
18.12	0.657553	0.334859	0.584696
18.13	0.639527	0.33912	0.592748
18.14	0.617989	0.345951	0.578842
18.15	0.61174	0.354323	0.564607
18.16	0.595453	0.350437	0.587675
18.17	0.577073	0.354918	0.595849
18.18	0.579654	0.35108	0.606018
18.19	0.619684	0.362756	0.586297
18.2	0.567827	0.354675	0.604221
18.21	0.557993	0.325978	0.604405
18.22	0.569753	0.343003	0.595118
18.23	0.595781	0.371142	0.593409
18.24	0.554385	0.399259	0.571976
18.25	0.580344	0.363906	0.577705
18.26	0.568505	0.382154	0.583028
18.27	0.532046	0.38447	0.587804
18.28	0.535712	0.361665	0.593386
18.29	0.578617	0.361355	0.61067
18.3	0.591283	0.357846	0.586944
18.31	0.53577	0.361204	0.590324
18.32	0.520789	0.330991	0.578856
18.33	0.584433	0.372304	0.577751
18.34	0.586026	0.371477	0.590017
18.35	0.581982	0.357305	0.604927
18.36	0.614361	0.365702	0.606643
18.37	0.579644	0.350267	0.618881
18.38	0.608968	0.362126	0.616585
18.39	0.586008	0.355491	0.621481
18.4	0.561751	0.37537	0.619616
18.41	0.570237	0.35948	0.610231
18.42	0.545539	0.357124	0.625361
18.43	0.573472	0.356634	0.629232
18.44	0.510679	0.367265	0.608026
18.45	0.514829	0.387756	0.593093
18.46	0.505545	0.360981	0.603503
18.47	0.530991	0.392089	0.601345
18.48	0.544051	0.36119	0.597217
18.49	0.539124	0.377924	0.607563
18.5	0.577241	0.384823	0.612022
18.51	0.522365	0.339178	0.614314
18.52	0.556802	0.350278	0.617926
18.53	0.55875	0.355477	0.607235
18.54	0.546671	0.332189	0.601877
18.55	0.538549	0.323272	0.612151
18.56	0.516178	0.380069	0.609742
18.57	0.503149	0.346871	0.602577
18.58	0.560709	0.347267	0.602153
18.59	0.559142	0.351017	0.603593
18.6	0.507926	0.370336	0.596518
18.61	0.489071	0.354044	0.590894
18.62	0.507052	0.344467	0.599545
18.63	0.507036	0.372994	0.595889
18.64	0.448702	0.364257	0.602766
18.65	0.513828	0.354988	0.616345
18.66	0.513421	0.355894	0.587688
18.67	0.487647	0.356396	0.587106
18.68	0.509785	0.369369	0.578391
18.69	0.545167	0.371452	0.581075
18.7	0.517262	0.381722	0.587955
18.71	0.512395	0.369329	0.611854
18.72	0.510756	0.359903	0.602893
18.73	0.488781	0.350562	0.588554
18.74	0.492232	0.350732	0.59153
18.75	0.535226	0.359335	0.593535
18.76	0.532896	0.376385	0.59736
18.77	0.526882	0.355683	0.608115
18.78	0.485288	0.370498	0.618751
18.79	0.538984	0.384965	0.623823
18.8	0.487884	0.357366	0.631561
18.81	0.478355	0.366408	0.610255
18.82	0.469332	0.346447	0.609788
18.83	0.488862	0.309059	0.615274
18.84	0.521625	0.371727	0.612973
18.85	0.532798	0.403471	0.615197
18.86	0.503897	0.395215	0.610002
18.87	0.512048	0.429741	0.620596
18.88	0.492235	0.429729	0.621135
18.89	0.490332	0.403265	0.625121
18.9	0.51826	0.390572	0.611202
18.91	0.497031	0.423747	0.628242
18.92	0.504166	0.410942	0.588451
18.93	0.526171	0.364033	0.605421
18.94	0.512959	0.367152	0.578438
18.95	0.549916	0.356615	0.611374
18.96	0.504247	0.345736	0.613779
18.97	0.500937	0.340823	0.614222
18.98	0.531997	0.363961	0.637742
18.99	0.522942	0.358165	0.653197
19	0.512526	0.374924	0.663652
19.01	0.48698	0.382945	0.662062
19.02	0.541776	0.383246	0.662443
19.03	0.488743	0.364285	0.669219
19.04	0.495274	0.333415	0.645229
19.05	0.466994	0.341669	0.651052
19.06	0.488343	0.358252	0.653097
19.07	0.48886	0.338958	0.659016
19.08	0.481783	0.361661	0.672339
19.09	0.469593	0.381985	0.647603
19.1	0.455977	0.392922	0.63188
19.11	0.44448	0.395923	0.630423
19.12	0.462141	0.384164	0.644597
19.13	0.470152	0.378152	0.640516
19.14	0.474412	0.365804	0.620875
19.15	0.489063	0.37753	0.637078
19.16	0.490472	0.380447	0.666282
19.17	0.496609	0.371958	0.666175
19.18	0.503653	0.389566	0.648482
19.19	0.495269	0.35393	0.663458
19.2	0.506532	0.37015	0.651327
19.21	0.503342	0.337554	0.695159
19.22	0.489079	0.322143	0.668435
19.23	0.499841	0.320094	0.644414
19.24	0.485357	0.319341	0.669244
19.25	0.50326	0.326825	0.704825
19.26	0.479852	0.325553	0.698559
19.27	0.506167	0.315011	0.68526
19.28	0.525696	0.323386	0.673948
19.29	0.488686	0.301765	0.676459
19.3	0.488952	0.308332	0.683972
19.31	0.462334	0.306289	0.696646
19.32	0.453275	0.350294	0.678982
19.33	0.475494	0.346009	0.681736
19.34	0.51811	0.375788	0.688628
19.35	0.500077	0.381791	0.711232
19.36	0.500744	0.35177	0.71886
19.37	0.492823	0.351961	0.698932
19.38	0.496666	0.34101	0.67254
19.39	0.504904	0.340527	0.662082
19.4	0.538087	0.32394	0.678412
19.41	0.58893	0.332831	0.669774
19.42	0.55711	0.335366	0.656905
19.43	0.515119	0.336649	0.646771
19.44	0.548834	0.328135	0.659969
19.45	0.489194	0.317171	0.673616
19.46	0.486426	0.340701	0.683608
19.47	0.502486	0.297442	0.68584
19.48	0.512394	0.32146	0.655818
19.49	0.551906	0.329714	0.639867
19.5	0.510667	0.313327	0.654853
19.51	0.51714	0.316726	0.655726
19.52	0.493015	0.320297	0.654161
19.53	0.475195	0.345378	0.635981
19.54	0.492624	0.37952	0.660919
19.55	0.529734	0.385016	0.680417
19.56	0.545051	0.381908	0.709655
19.57	0.546945	0.38488	0.705241
19.58	0.548205	0.378639	0.710069
19.59	0.503795	0.355907	0.676341
19.6	0.523783	0.345792	0.702876
19.61	0.542214	0.327155	0.705712
19.62	0.535465	0.311888	0.732396
19.63	0.547298	0.341767	0.726285
19.64	0.555572	0.345396	0.734932
19.65	0.557157	0.348968	0.743314
19.66	0.585113	0.331776	0.756355
19.67	0.56097	0.351586	0.748135
19.68	0.56275	0.356352	0.754989
19.69	0.56085	0.330684	0.737894
19.7	0.575281	0.35604	0.75438
19.71	0.579037	0.339542	0.800395
19.72	0.588653	0.348042	0.791056
19.73	0.585783	0.351758	0.79214
19.74	0.588265	0.344588	0.789857
19.75	0.593741	0.35943	0.782077
19.76	0.570829	0.356467	0.768487
19.77	0.590148	0.364297	0.754472
19.78	0.559433	0.363	0.763106
19.79	0.560209	0.360759	0.741007
19.8	0.546728	0.361091	0.732361
19.81	0.572972	0.361314	0.73242
19.82	0.59078	0.361997	0.742111
19.83	0.55768	0.352638	0.758181
19.84	0.581253	0.382756	0.758403
19.85	0.596814	0.387779	0.767853
19.86	0.560578	0.387652	0.75795
19.87	0.556374	0.378267	0.725287
19.88	0.533947	0.382832	0.740864
19.89	0.514825	0.374816	0.730472
19.9	0.521755	0.368248	0.724837
19.91	0.570076	0.389531	0.746811
19.92	0.536793	0.332782	0.73499
19.93	0.529114	0.338764	0.744964
19.94	0.491856	0.340925	0.757775
19.95	0.514144	0.350129	0.738673
19.96	0.514089	0.344593	0.698517
19.97	0.521204	0.348777	0.692855
19.98	0.49377	0.340849	0.722538
[truncated: 48,002 more rows]

## Sheet: Binding energy
		Montelukast_binding energy				Saquinavir_binding energy
		Kcal/mol				Kcal/mol
Replica_1		-76.6				-35.3
Replica_2		-114.9				-50.2
Average		-95.75				-42.75
Stddv		19.15				7.45
Stder		13.5411				5.26795
