# Supplementary material for: Drug targeting Nsp1-ribosomal complex shows antiviral activity against SARS-CoV-2
Source: eLife journal article supplement (doi:10.7554/elife.74877), 2022-03-24
Supplement: supp [file Figure 1-supplement 1-source data_Nano-DSF screening.xlsx]

## Sheet: Nsp1_screening
Temperature	Cloxacillin	Perindoprin	Bosentine	Dopexamine	Nicardipin	Saquinavir	Montelukast	Lidoflazine	Doripenem	Mupirocin	Verapmil	Formoterol	Nsp1
20	0.675532	0.68206	0.776643	0.65753	0.663384	0.650173	0.714133	0.785528	0.725079	1	0.861561	0.947055	0.675532
20.022	0.675532	0.68206	0.776643	0.65753	0.663384	0.650403	0.714133	0.785528	0.725079	1	0.861561	0.947055	0.675532
20.043	0.675532	0.68206	0.776643	0.65753	0.663384	0.650863	0.714133	0.785528	0.725079	1	0.861561	0.947055	0.675532
20.065	0.675532	0.68206	0.776643	0.65753	0.663384	0.651093	0.7144	0.785528	0.725079	1	0.861561	0.947055	0.675532
20.087	0.675532	0.68206	0.776643	0.65753	0.663384	0.651323	0.7144	0.785528	0.725079	1	0.860088	0.947055	0.675532
20.109	0.675532	0.68206	0.776643	0.65753	0.663384	0.651784	0.7144	0.785528	0.725079	1	0.860088	0.947055	0.675532
20.13	0.675532	0.68206	0.776643	0.65753	0.66316	0.652014	0.714667	0.785528	0.725079	1	0.860088	0.947055	0.675532
20.152	0.675532	0.68206	0.776643	0.65753	0.66316	0.652244	0.714667	0.785528	0.725079	1	0.858616	0.947055	0.675532
20.174	0.675532	0.68206	0.776643	0.65753	0.66316	0.652704	0.714667	0.785528	0.725079	1	0.858616	0.947055	0.675532
20.196	0.675532	0.68206	0.776643	0.65753	0.66316	0.652934	0.714935	0.785528	0.725079	1	0.858616	0.947055	0.675532
20.217	0.675532	0.68206	0.776643	0.65753	0.66316	0.653165	0.714935	0.785528	0.725079	1	0.858616	0.947055	0.675532
20.239	0.675532	0.68206	0.776643	0.65753	0.66316	0.653395	0.714935	0.785528	0.725079	1	0.857143	0.947055	0.675532
20.261	0.675532	0.68206	0.776643	0.65753	0.66316	0.653855	0.714935	0.785528	0.725079	1	0.857143	0.947055	0.675532
20.283	0.675532	0.68206	0.776643	0.65753	0.66316	0.654085	0.715202	0.785528	0.725079	1	0.857143	0.947055	0.675532
20.304	0.675532	0.68206	0.776643	0.65753	0.66316	0.654315	0.715202	0.785528	0.725079	1	0.85567	0.947055	0.675532
20.326	0.675532	0.68206	0.776643	0.65753	0.662936	0.654776	0.715202	0.785528	0.725079	1	0.85567	0.947055	0.675532
20.348	0.675532	0.68206	0.776643	0.65753	0.662936	0.655006	0.715469	0.785528	0.725079	1	0.85567	0.947055	0.675532
20.37	0.675532	0.68206	0.776643	0.657831	0.662936	0.655236	0.715469	0.785528	0.725079	1	0.85567	0.947055	0.675532
20.391	0.675532	0.68206	0.776643	0.657831	0.662936	0.655466	0.715469	0.785528	0.725603	1	0.854197	0.947055	0.675532
20.413	0.675532	0.68206	0.776643	0.657831	0.662936	0.655926	0.715736	0.785528	0.725603	1	0.854197	0.947055	0.675532
20.435	0.675532	0.68206	0.776643	0.657831	0.662936	0.656157	0.715736	0.785528	0.725603	1	0.854197	0.947055	0.675532
20.457	0.675532	0.68206	0.776643	0.657831	0.662936	0.656387	0.715736	0.785528	0.725603	1	0.854197	0.947055	0.675532
20.478	0.675532	0.68206	0.776643	0.657831	0.662936	0.656617	0.716003	0.785528	0.725603	1	0.852725	0.947055	0.675532
20.5	0.675532	0.68206	0.776643	0.657831	0.662936	0.656847	0.716003	0.785528	0.725603	1	0.852725	0.947055	0.675532
20.522	0.675532	0.68206	0.776643	0.657831	0.662936	0.657307	0.716003	0.785528	0.725603	1	0.852725	0.947055	0.675532
20.544	0.675532	0.68206	0.776643	0.657831	0.662713	0.657537	0.71627	0.785528	0.725603	1	0.852725	0.947055	0.675532
20.565	0.675532	0.68206	0.776643	0.657831	0.662713	0.657768	0.71627	0.785528	0.725603	1	0.851252	0.947055	0.675532
20.587	0.675532	0.68206	0.776643	0.657831	0.662713	0.657998	0.71627	0.785528	0.725603	1	0.851252	0.947055	0.675532
20.609	0.675532	0.68206	0.776643	0.657831	0.662713	0.658228	0.71627	0.785528	0.725603	1	0.851252	0.947055	0.675532
20.631	0.675532	0.68206	0.776643	0.657831	0.662713	0.658688	0.716538	0.785528	0.725603	1	0.851252	0.947055	0.675532
20.652	0.675532	0.68206	0.776643	0.657831	0.662713	0.658918	0.716538	0.785528	0.725603	1	0.849779	0.947055	0.675532
20.674	0.675532	0.68206	0.776643	0.657831	0.662713	0.659148	0.716538	0.785528	0.725603	1	0.849779	0.947055	0.675532
20.696	0.675532	0.68206	0.776643	0.657831	0.662713	0.659379	0.716805	0.785528	0.725603	1	0.849779	0.947055	0.675532
20.718	0.675532	0.68206	0.776643	0.657831	0.662713	0.659609	0.716805	0.785528	0.725603	1	0.849779	0.947055	0.675532
20.739	0.675532	0.68206	0.776643	0.657831	0.662713	0.659839	0.716805	0.785528	0.725603	1	0.849779	0.947055	0.675532
20.761	0.675532	0.68206	0.776643	0.657831	0.662713	0.660299	0.717072	0.785528	0.725603	1	0.848306	0.947055	0.675532
20.783	0.675532	0.68206	0.776643	0.657831	0.662489	0.660529	0.717072	0.785528	0.725603	1	0.848306	0.947055	0.675532
20.805	0.675532	0.68206	0.776643	0.657831	0.662489	0.660759	0.717072	0.785528	0.725603	1	0.848306	0.947055	0.675532
20.826	0.675532	0.68206	0.776643	0.658133	0.662489	0.66099	0.717339	0.785528	0.725603	1	0.848306	0.947055	0.675532
20.848	0.675532	0.68206	0.776643	0.658133	0.662489	0.66122	0.717339	0.785528	0.725603	1	0.846834	0.947055	0.676064
20.87	0.675532	0.68206	0.776643	0.658133	0.662489	0.66145	0.717339	0.785528	0.725603	1	0.846834	0.947055	0.676064
20.892	0.675532	0.68206	0.776643	0.658133	0.662489	0.66168	0.717606	0.785528	0.725603	1	0.846834	0.947055	0.676064
20.913	0.675532	0.68206	0.776643	0.658133	0.662489	0.66191	0.717606	0.785528	0.725603	1	0.846834	0.947055	0.676064
20.935	0.675532	0.68206	0.776643	0.658133	0.662489	0.662371	0.717606	0.785528	0.725603	1	0.846834	0.947055	0.676064
20.957	0.675532	0.68206	0.776643	0.658133	0.662489	0.662601	0.717873	0.785528	0.725603	1	0.845361	0.947055	0.676064
20.979	0.675532	0.68206	0.776643	0.658133	0.662489	0.662831	0.717873	0.785528	0.725603	1	0.845361	0.947055	0.676064
21	0.675532	0.68206	0.776643	0.658133	0.662489	0.663061	0.717873	0.785528	0.725603	1	0.845361	0.947055	0.676064
21.022	0.675532	0.68206	0.776643	0.658133	0.662489	0.663291	0.717873	0.785528	0.725603	1	0.845361	0.947055	0.676064
21.044	0.675532	0.68206	0.776643	0.658133	0.662489	0.663521	0.718141	0.785528	0.725603	1	0.845361	0.947055	0.676064
21.066	0.675532	0.68206	0.776643	0.658133	0.662265	0.663751	0.718141	0.785528	0.725603	1	0.843888	0.947055	0.676064
21.087	0.675532	0.68206	0.776643	0.658133	0.662265	0.663982	0.718141	0.785528	0.725603	1	0.843888	0.947055	0.676064
21.109	0.675532	0.68206	0.776643	0.658133	0.662265	0.664212	0.718408	0.785528	0.725603	1	0.843888	0.947055	0.676064
21.131	0.675532	0.68206	0.776643	0.658133	0.662265	0.664442	0.718408	0.785528	0.725603	1	0.843888	0.947055	0.676064
21.153	0.675532	0.68206	0.776643	0.658133	0.662265	0.664672	0.718408	0.785528	0.725603	1	0.843888	0.947055	0.676064
21.174	0.676064	0.68206	0.776643	0.658133	0.662265	0.664902	0.718675	0.785528	0.725603	1	0.843888	0.947055	0.676064
21.196	0.676064	0.68206	0.776643	0.658133	0.662265	0.665132	0.718675	0.785528	0.725603	1	0.842415	0.947055	0.676064
21.218	0.676064	0.68206	0.776643	0.658434	0.662265	0.665362	0.718675	0.785528	0.725603	1	0.842415	0.947055	0.676064
21.24	0.676064	0.68206	0.776643	0.658434	0.662265	0.665593	0.718942	0.785528	0.725603	1	0.842415	0.947055	0.676064
21.261	0.676064	0.68206	0.776643	0.658434	0.662265	0.665823	0.718942	0.785528	0.725603	1	0.842415	0.947055	0.676064
21.283	0.676064	0.68206	0.776643	0.658434	0.662265	0.666053	0.718942	0.785528	0.725603	1	0.842415	0.947055	0.676064
21.305	0.676064	0.68206	0.776643	0.658434	0.662265	0.666283	0.718942	0.785528	0.725603	1	0.842415	0.947055	0.676064
21.327	0.676064	0.68206	0.776643	0.658434	0.662265	0.666513	0.719209	0.785528	0.725603	1	0.840943	0.947055	0.676064
21.348	0.676064	0.68206	0.776643	0.658434	0.662265	0.666743	0.719209	0.785528	0.725603	1	0.840943	0.947055	0.676064
21.37	0.676064	0.68206	0.776643	0.658434	0.662265	0.666974	0.719209	0.785528	0.725603	1	0.840943	0.947055	0.676064
21.392	0.676064	0.68206	0.776643	0.658434	0.662265	0.667204	0.719476	0.785528	0.725603	1	0.840943	0.947055	0.676064
21.414	0.676064	0.68206	0.776643	0.658434	0.662041	0.667434	0.719476	0.785528	0.725603	1	0.840943	0.947055	0.676064
21.435	0.676064	0.68206	0.776643	0.658434	0.662041	0.667664	0.719476	0.785528	0.725603	1	0.840943	0.947055	0.676064
21.457	0.676064	0.68206	0.776643	0.658434	0.662041	0.667894	0.719744	0.785528	0.725603	1	0.83947	0.947055	0.676064
21.479	0.676064	0.68206	0.776643	0.658434	0.662041	0.668124	0.719744	0.785528	0.725603	1	0.83947	0.947055	0.676064
21.501	0.676064	0.68206	0.776643	0.658434	0.662041	0.668354	0.719744	0.785528	0.725603	1	0.83947	0.947055	0.676064
21.522	0.676064	0.68206	0.776643	0.658434	0.662041	0.668585	0.720011	0.785528	0.725603	1	0.83947	0.947055	0.676064
21.544	0.676064	0.68206	0.776643	0.658735	0.662041	0.668815	0.720011	0.785528	0.725603	1	0.83947	0.947055	0.676064
21.566	0.676064	0.68206	0.776643	0.658735	0.662041	0.669045	0.720011	0.785528	0.725603	1	0.83947	0.947055	0.676064
21.588	0.676064	0.68206	0.776643	0.658735	0.662041	0.669275	0.720011	0.785528	0.725603	1	0.83947	0.947055	0.676064
21.609	0.676064	0.68206	0.776643	0.658735	0.662041	0.669505	0.720278	0.785528	0.725603	1	0.83947	0.947055	0.676064
21.631	0.676064	0.68206	0.776643	0.658735	0.662041	0.669735	0.720278	0.785528	0.725603	1	0.837997	0.947055	0.676064
21.653	0.676064	0.68206	0.776643	0.658735	0.662041	0.669965	0.720278	0.785528	0.725603	1	0.837997	0.947055	0.676064
21.675	0.676064	0.68206	0.776643	0.658735	0.662041	0.670196	0.720545	0.785528	0.725603	1	0.837997	0.947055	0.676064
21.696	0.676064	0.68206	0.776643	0.658735	0.662041	0.670426	0.720545	0.785528	0.725603	1	0.837997	0.947055	0.676064
21.718	0.676064	0.68206	0.776643	0.658735	0.662041	0.670656	0.720545	0.785528	0.725603	1	0.837997	0.947055	0.676064
21.74	0.676064	0.68206	0.776643	0.658735	0.662041	0.670886	0.720545	0.785528	0.725603	1	0.837997	0.947055	0.676064
21.762	0.676064	0.68206	0.776643	0.658735	0.662041	0.671116	0.720812	0.785528	0.725603	1	0.837997	0.947055	0.676064
21.783	0.676064	0.68206	0.776643	0.658735	0.662041	0.671346	0.720812	0.785528	0.725603	1	0.837997	0.947055	0.676064
21.805	0.676064	0.68206	0.776643	0.658735	0.662041	0.671577	0.720812	0.785528	0.725603	1	0.836524	0.947055	0.676064
21.827	0.676064	0.68206	0.776643	0.659036	0.662041	0.671807	0.721079	0.785528	0.725603	1	0.836524	0.947055	0.676064
21.848	0.676064	0.68206	0.776643	0.659036	0.662041	0.671807	0.721079	0.785528	0.725603	1	0.836524	0.947055	0.676596
21.87	0.676064	0.68206	0.776643	0.659036	0.662041	0.672037	0.721079	0.785528	0.725603	1	0.836524	0.947055	0.676596
21.892	0.676064	0.68206	0.776643	0.659036	0.662041	0.672267	0.721079	0.785528	0.725603	1	0.836524	0.947055	0.676596
21.914	0.676064	0.68206	0.776643	0.659036	0.662041	0.672497	0.721347	0.785528	0.725603	1	0.836524	0.947055	0.676596
21.935	0.676064	0.68206	0.776643	0.659036	0.662041	0.672727	0.721347	0.785528	0.725603	1	0.836524	0.947055	0.676596
21.957	0.676064	0.682652	0.776643	0.659036	0.662041	0.672957	0.721347	0.785528	0.725603	1	0.836524	0.947055	0.676596
21.979	0.676064	0.682652	0.776643	0.659036	0.662041	0.673188	0.721614	0.785528	0.726128	1	0.836524	0.947055	0.676596
22.001	0.676064	0.682652	0.776643	0.659036	0.662041	0.673418	0.721614	0.785528	0.726128	1	0.836524	0.947055	0.676596
22.022	0.676064	0.682652	0.776643	0.659036	0.662041	0.673648	0.721614	0.785528	0.726128	1	0.835052	0.947055	0.676596
22.044	0.676064	0.682652	0.776643	0.659036	0.662041	0.673878	0.721614	0.785528	0.726128	1	0.835052	0.947055	0.676596
22.066	0.676064	0.682652	0.776643	0.659036	0.662041	0.674108	0.721881	0.785528	0.726128	1	0.835052	0.947055	0.676596
22.088	0.676064	0.682652	0.776643	0.659337	0.662041	0.674338	0.721881	0.785528	0.726128	1	0.835052	0.947055	0.676596
22.109	0.676064	0.682652	0.776643	0.659337	0.662041	0.674568	0.721881	0.785528	0.726128	1	0.835052	0.947055	0.676596
22.131	0.676064	0.682652	0.776643	0.659337	0.662041	0.674799	0.721881	0.785528	0.726128	1	0.835052	0.947055	0.676596
22.153	0.676064	0.682652	0.776643	0.659337	0.662041	0.674799	0.722148	0.785528	0.726128	1	0.835052	0.947055	0.676596
22.175	0.676596	0.682652	0.776643	0.659337	0.662041	0.675029	0.722148	0.785528	0.726128	1	0.835052	0.947055	0.676596
22.196	0.676596	0.682652	0.776643	0.659337	0.662041	0.675259	0.722148	0.785528	0.726128	1	0.835052	0.947055	0.676596
22.218	0.676596	0.682652	0.776643	0.659337	0.662041	0.675489	0.722415	0.785528	0.726128	1	0.835052	0.947055	0.676596
22.24	0.676596	0.682652	0.776643	0.659337	0.662041	0.675719	0.722415	0.785528	0.726128	1	0.835052	0.947055	0.676596
22.262	0.676596	0.682652	0.776643	0.659337	0.662041	0.675949	0.722415	0.785528	0.726128	1	0.835052	0.947055	0.676596
22.283	0.676596	0.682652	0.776643	0.659337	0.662041	0.67618	0.722415	0.785528	0.726128	1	0.833579	0.947055	0.676596
22.305	0.676596	0.682652	0.776643	0.659337	0.662041	0.67641	0.722682	0.785528	0.726128	1	0.833579	0.947055	0.676596
22.327	0.676596	0.682652	0.776643	0.659639	0.662041	0.67664	0.722682	0.785528	0.726128	1	0.833579	0.947055	0.676596
22.349	0.676596	0.682652	0.776643	0.659639	0.662041	0.67687	0.722682	0.785528	0.726128	1	0.833579	0.947055	0.676596
22.37	0.676596	0.682652	0.776643	0.659639	0.662041	0.6771	0.722682	0.785528	0.726128	1	0.833579	0.947055	0.676596
22.392	0.676596	0.682652	0.776643	0.659639	0.662041	0.67733	0.72295	0.785528	0.726128	1	0.833579	0.947055	0.676596
22.414	0.676596	0.682652	0.776643	0.659639	0.662041	0.67756	0.72295	0.785528	0.726128	1	0.833579	0.947055	0.676596
22.436	0.676596	0.682652	0.776643	0.659639	0.662041	0.677791	0.72295	0.785528	0.726128	1	0.833579	0.947055	0.676596
22.457	0.676596	0.682652	0.776643	0.659639	0.662041	0.678021	0.72295	0.785528	0.726128	1	0.833579	0.94646	0.676596
22.479	0.676596	0.682652	0.776643	0.659639	0.662041	0.678251	0.723217	0.785528	0.726128	1	0.833579	0.94646	0.676596
22.501	0.676596	0.682652	0.776643	0.659639	0.662041	0.678481	0.723217	0.785528	0.726128	1	0.833579	0.94646	0.676596
22.523	0.676596	0.682652	0.776643	0.659639	0.662265	0.678711	0.723217	0.785528	0.726128	1	0.833579	0.94646	0.676596
22.544	0.676596	0.682652	0.776643	0.65994	0.662265	0.678941	0.723217	0.785528	0.726128	1	0.833579	0.94646	0.677128
22.566	0.676596	0.682652	0.776643	0.65994	0.662265	0.679171	0.723484	0.785528	0.726128	1	0.832106	0.94646	0.677128
22.588	0.676596	0.682652	0.776643	0.65994	0.662265	0.679402	0.723484	0.785528	0.726128	1	0.832106	0.94646	0.677128
22.61	0.676596	0.682652	0.776643	0.65994	0.662265	0.679632	0.723484	0.785528	0.726128	1	0.832106	0.94646	0.677128
22.631	0.676596	0.682652	0.776643	0.65994	0.662265	0.679862	0.723484	0.785528	0.726128	1	0.832106	0.94646	0.677128
22.653	0.676596	0.682652	0.776643	0.65994	0.662265	0.680092	0.723751	0.785528	0.726128	1	0.832106	0.94646	0.677128
22.675	0.676596	0.682652	0.776643	0.65994	0.662265	0.680552	0.723751	0.785528	0.726128	1	0.832106	0.94646	0.677128
22.697	0.676596	0.682652	0.776643	0.65994	0.662265	0.680783	0.723751	0.785528	0.726128	1	0.832106	0.94646	0.677128
22.718	0.676596	0.682652	0.776643	0.65994	0.662265	0.681013	0.723751	0.785528	0.726128	1	0.832106	0.94646	0.677128
22.74	0.676596	0.682652	0.776643	0.660241	0.662265	0.681243	0.724018	0.785528	0.726128	1	0.832106	0.94646	0.677128
22.762	0.676596	0.682652	0.776643	0.660241	0.662265	0.681473	0.724018	0.785528	0.726128	1	0.832106	0.94646	0.677128
22.784	0.676596	0.682652	0.776643	0.660241	0.662265	0.681703	0.724018	0.785528	0.726128	1	0.832106	0.94646	0.677128
22.805	0.676596	0.682652	0.776643	0.660241	0.662265	0.681933	0.724018	0.785528	0.726128	1	0.832106	0.94646	0.677128
22.827	0.676596	0.682652	0.776643	0.660241	0.662265	0.682163	0.724285	0.785528	0.726128	1	0.832106	0.94646	0.677128
22.849	0.676596	0.682652	0.776643	0.660241	0.662265	0.682394	0.724285	0.785528	0.726128	1	0.830633	0.94646	0.677128
22.871	0.677128	0.682652	0.776643	0.660241	0.662265	0.682624	0.724285	0.785528	0.726128	1	0.830633	0.94646	0.677128
22.892	0.677128	0.682652	0.776643	0.660241	0.662265	0.683084	0.724285	0.785528	0.726128	1	0.830633	0.94646	0.677128
22.914	0.677128	0.682652	0.776643	0.660241	0.662489	0.683314	0.724552	0.785528	0.726653	1	0.830633	0.94646	0.677128
22.936	0.677128	0.682652	0.776643	0.660542	0.662489	0.683544	0.724552	0.785528	0.726653	1	0.830633	0.94646	0.677128
22.958	0.677128	0.682652	0.776643	0.660542	0.662489	0.683774	0.724552	0.785528	0.726653	1	0.830633	0.94646	0.677128
22.979	0.677128	0.682652	0.776643	0.660542	0.662489	0.684005	0.724552	0.785528	0.726653	1	0.830633	0.94646	0.677128
23.001	0.677128	0.682652	0.776643	0.660542	0.662489	0.684235	0.724552	0.785528	0.726653	1	0.830633	0.94646	0.677128
23.023	0.677128	0.683245	0.776643	0.660542	0.662489	0.684465	0.72482	0.785528	0.726653	1	0.832106	0.94646	0.67766
23.045	0.677128	0.683245	0.776643	0.660843	0.662713	0.684695	0.72482	0.785528	0.726653	1	0.832106	0.94646	0.67766
23.066	0.677128	0.683245	0.776643	0.660843	0.662713	0.684925	0.72482	0.785528	0.726653	1	0.832106	0.94646	0.67766
23.088	0.677128	0.683245	0.776643	0.660843	0.662936	0.685155	0.72482	0.785528	0.726653	1	0.832106	0.94646	0.67766
23.11	0.677128	0.683245	0.776643	0.661145	0.662936	0.685386	0.72482	0.785528	0.726653	1	0.833579	0.94646	0.67766
23.132	0.677128	0.683245	0.776643	0.661145	0.662936	0.685616	0.72482	0.785528	0.726653	1	0.833579	0.94646	0.67766
23.153	0.677128	0.683245	0.776643	0.661145	0.66316	0.685846	0.72482	0.785528	0.726653	1	0.833579	0.94646	0.678191
23.175	0.677128	0.683245	0.776643	0.661446	0.66316	0.686076	0.72482	0.785528	0.727177	1	0.833579	0.94646	0.678191
23.197	0.677128	0.683245	0.776643	0.661446	0.663384	0.686306	0.72482	0.785528	0.727177	1	0.835052	0.94646	0.678191
23.219	0.677128	0.683837	0.776643	0.661446	0.663384	0.686536	0.725087	0.785528	0.727177	1	0.835052	0.94646	0.678191
23.24	0.677128	0.683837	0.776643	0.661747	0.663384	0.686766	0.725087	0.785528	0.727177	1	0.835052	0.94646	0.678191
23.262	0.677128	0.683837	0.776643	0.661747	0.663608	0.686997	0.725087	0.785528	0.727177	1	0.836524	0.94646	0.678723
23.284	0.677128	0.683837	0.776643	0.662048	0.663608	0.687227	0.725087	0.785528	0.727177	1	0.836524	0.94646	0.678723
23.306	0.677128	0.683837	0.777281	0.662048	0.663832	0.687687	0.725087	0.785528	0.727177	1	0.836524	0.94646	0.678723
23.327	0.677128	0.683837	0.777281	0.662048	0.663832	0.687917	0.725087	0.785528	0.727177	1	0.837997	0.94646	0.678723
23.349	0.67766	0.684429	0.777281	0.662349	0.664056	0.688147	0.725087	0.785528	0.727702	1	0.837997	0.94646	0.679255
23.371	0.67766	0.684429	0.777281	0.662349	0.664056	0.688377	0.725087	0.785528	0.727702	1	0.837997	0.94646	0.679255
23.393	0.67766	0.684429	0.777281	0.662651	0.664279	0.688608	0.725354	0.785528	0.727702	1	0.83947	0.94646	0.679255
23.414	0.67766	0.684429	0.777281	0.662651	0.664279	0.689068	0.725354	0.785528	0.727702	1	0.83947	0.94646	0.679255
23.436	0.67766	0.684429	0.777281	0.662952	0.664279	0.689298	0.725354	0.785528	0.727702	1	0.83947	0.94646	0.679787
23.458	0.67766	0.685021	0.777281	0.662952	0.664503	0.689528	0.725354	0.785528	0.727702	1	0.83947	0.94646	0.679787
23.48	0.678191	0.685021	0.777281	0.662952	0.664503	0.689758	0.725354	0.785528	0.728227	1	0.840943	0.94646	0.679787
23.501	0.678191	0.685021	0.777281	0.663253	0.664727	0.690219	0.725354	0.785528	0.728227	1	0.840943	0.94646	0.680319
23.523	0.678191	0.685021	0.777281	0.663253	0.664727	0.690449	0.725354	0.785528	0.728227	1	0.842415	0.94646	0.680319
23.545	0.678191	0.685021	0.777281	0.663554	0.664951	0.690679	0.725621	0.785528	0.728227	1	0.842415	0.94646	0.680319
23.567	0.678191	0.685613	0.777281	0.663554	0.664951	0.690909	0.725621	0.785528	0.728227	1	0.842415	0.94646	0.680851
23.588	0.678723	0.685613	0.777281	0.663855	0.665175	0.691369	0.725621	0.785528	0.728751	1	0.843888	0.94646	0.680851
23.61	0.678723	0.685613	0.777281	0.663855	0.665175	0.6916	0.725621	0.785528	0.728751	1	0.843888	0.94646	0.680851
23.632	0.678723	0.685613	0.777281	0.664157	0.665398	0.69183	0.725621	0.785528	0.728751	1	0.843888	0.94646	0.681383
23.653	0.678723	0.686205	0.777281	0.664458	0.665398	0.69229	0.725621	0.785528	0.728751	1	0.845361	0.94646	0.681383
23.675	0.679255	0.686205	0.77792	0.664458	0.665622	0.69252	0.725888	0.785528	0.728751	1	0.845361	0.94646	0.681383
23.697	0.679255	0.686205	0.77792	0.664759	0.665846	0.69275	0.725888	0.785528	0.729276	1	0.845361	0.945866	0.681915
23.719	0.679255	0.686797	0.77792	0.664759	0.665846	0.693211	0.725888	0.785528	0.729276	1	0.846834	0.945866	0.681915
23.74	0.679255	0.686797	0.77792	0.66506	0.66607	0.693441	0.725888	0.785528	0.729276	1	0.846834	0.945866	0.682447
23.762	0.679787	0.686797	0.77792	0.66506	0.66607	0.693901	0.725888	0.785528	0.729276	1	0.848306	0.945866	0.682447
23.784	0.679787	0.687389	0.77792	0.665361	0.666294	0.694131	0.726155	0.785528	0.729801	1	0.848306	0.945866	0.682447
23.806	0.679787	0.687389	0.77792	0.665663	0.666294	0.694361	0.726155	0.785528	0.729801	1	0.848306	0.945866	0.682979
23.827	0.680319	0.687389	0.77792	0.665663	0.666517	0.694822	0.726155	0.785528	0.729801	1	0.849779	0.945866	0.682979
23.849	0.680319	0.687981	0.77792	0.665964	0.666517	0.695052	0.726155	0.785528	0.729801	1	0.849779	0.945866	0.683511
23.871	0.680319	0.687981	0.77792	0.665964	0.666741	0.695512	0.726423	0.785528	0.730325	1	0.849779	0.945866	0.683511
23.893	0.680851	0.687981	0.778558	0.666265	0.666741	0.695742	0.726423	0.785528	0.730325	1	0.851252	0.945866	0.684043
23.914	0.680851	0.688573	0.778558	0.666566	0.666965	0.696203	0.726423	0.785528	0.730325	1	0.851252	0.945866	0.684043
23.936	0.680851	0.688573	0.778558	0.666566	0.667189	0.696433	0.726423	0.785528	0.730325	1	0.852725	0.945866	0.684043
23.958	0.681383	0.689165	0.778558	0.666867	0.667189	0.696663	0.72669	0.785528	0.73085	1	0.852725	0.945866	0.684574
23.98	0.681383	0.689165	0.778558	0.667169	0.667413	0.697123	0.72669	0.785528	0.73085	1	0.852725	0.945866	0.684574
24.001	0.681383	0.689165	0.778558	0.667169	0.667413	0.697353	0.72669	0.785528	0.73085	1	0.854197	0.945866	0.685106
24.023	0.681915	0.689757	0.778558	0.66747	0.667637	0.697814	0.72669	0.785528	0.73085	1	0.854197	0.945866	0.685106
24.045	0.681915	0.689757	0.778558	0.667771	0.66786	0.698044	0.726957	0.785528	0.731375	1	0.85567	0.945271	0.685638
24.067	0.682447	0.690349	0.778558	0.668072	0.66786	0.698504	0.726957	0.785528	0.731375	1	0.85567	0.945271	0.685638
24.088	0.682447	0.690349	0.779196	0.668072	0.668084	0.698734	0.726957	0.785528	0.731375	1	0.857143	0.945271	0.68617
24.11	0.682447	0.690941	0.779196	0.668373	0.668084	0.699194	0.727224	0.785528	0.731899	1	0.857143	0.945271	0.68617
24.132	0.682979	0.690941	0.779196	0.668675	0.668308	0.699425	0.727224	0.785528	0.731899	1	0.857143	0.945271	0.686702
24.154	0.682979	0.691533	0.779196	0.668976	0.668532	0.699885	0.727224	0.785528	0.731899	1	0.858616	0.945271	0.686702
24.175	0.683511	0.691533	0.779196	0.668976	0.668532	0.700115	0.727491	0.785528	0.732424	1	0.858616	0.945271	0.687234
24.197	0.683511	0.692126	0.779196	0.669277	0.668756	0.700575	0.727491	0.785528	0.732424	1	0.860088	0.945271	0.687766
24.219	0.684043	0.692126	0.779834	0.669578	0.668756	0.701036	0.727491	0.785528	0.732424	1	0.860088	0.945271	0.687766
24.241	0.684043	0.692718	0.779834	0.66988	0.668979	0.701266	0.727758	0.785528	0.732949	1	0.860088	0.945271	0.688298
24.262	0.684043	0.692718	0.779834	0.670181	0.669203	0.701726	0.727758	0.785528	0.732949	1	0.861561	0.945271	0.688298
24.284	0.684574	0.69331	0.779834	0.670181	0.669203	0.701956	0.728026	0.785528	0.732949	1	0.861561	0.945271	0.68883
24.306	0.684574	0.69331	0.779834	0.670482	0.669427	0.702417	0.728026	0.785528	0.733473	1	0.863034	0.945271	0.68883
24.328	0.685106	0.693902	0.779834	0.670783	0.669651	0.702647	0.728026	0.785528	0.733473	1	0.863034	0.944676	0.689362
24.349	0.685106	0.693902	0.779834	0.671084	0.669651	0.703107	0.728293	0.785528	0.733473	1	0.863034	0.944676	0.689894
24.371	0.685638	0.694494	0.780472	0.671386	0.669875	0.703567	0.728293	0.785528	0.733998	1	0.864507	0.944676	0.689894
24.393	0.685638	0.695086	0.780472	0.671687	0.670098	0.703797	0.72856	0.785528	0.733998	1	0.864507	0.944676	0.690426
24.415	0.68617	0.695086	0.780472	0.671988	0.670098	0.704258	0.72856	0.785528	0.734523	1	0.865979	0.944676	0.690426
24.436	0.68617	0.695678	0.780472	0.672289	0.670322	0.704488	0.728827	0.785528	0.734523	1	0.865979	0.944676	0.690957
24.458	0.686702	0.695678	0.780472	0.67259	0.670546	0.704948	0.728827	0.785528	0.734523	1	0.865979	0.944676	0.691489
24.48	0.686702	0.69627	0.78111	0.67259	0.670546	0.705409	0.729094	0.785528	0.735047	1	0.867452	0.944676	0.691489
24.502	0.687234	0.696862	0.78111	0.672892	0.67077	0.705639	0.729094	0.785528	0.735047	1	0.867452	0.944676	0.692021
24.523	0.687766	0.696862	0.78111	0.673193	0.670994	0.706099	0.729361	0.785528	0.735572	1	0.868925	0.944676	0.692553
24.545	0.687766	0.697454	0.78111	0.673494	0.671218	0.706559	0.729361	0.785528	0.735572	1	0.868925	0.944676	0.692553
24.567	0.688298	0.698046	0.78111	0.673795	0.671218	0.706789	0.729629	0.785528	0.735572	1	0.868925	0.944081	0.693085
24.589	0.688298	0.698046	0.781749	0.674096	0.671441	0.70725	0.729629	0.785528	0.736097	1	0.870398	0.944081	0.693617
24.61	0.68883	0.698638	0.781749	0.674398	0.671665	0.70771	0.729896	0.785528	0.736097	1	0.870398	0.944081	0.693617
24.632	0.68883	0.69923	0.781749	0.675	0.671665	0.70794	0.729896	0.785528	0.736621	1	0.87187	0.944081	0.694149
24.654	0.689362	0.699822	0.781749	0.675301	0.671889	0.7084	0.730163	0.785528	0.736621	1	0.87187	0.944081	0.694681
24.676	0.689894	0.699822	0.781749	0.675602	0.672113	0.708861	0.73043	0.785528	0.736621	1	0.87187	0.944081	0.694681
24.697	0.689894	0.700414	0.782387	0.675904	0.672337	0.709091	0.73043	0.785528	0.737146	1	0.873343	0.944081	0.695213
24.719	0.690426	0.701007	0.782387	0.676205	0.672337	0.709551	0.730697	0.785528	0.737146	1	0.873343	0.944081	0.695745
24.741	0.690426	0.701007	0.782387	0.676506	0.67256	0.710012	0.730697	0.785528	0.737671	1	0.874816	0.944081	0.695745
24.763	0.690957	0.701599	0.782387	0.676807	0.672784	0.710472	0.730964	0.785528	0.737671	1	0.874816	0.944081	0.696277
24.784	0.691489	0.702191	0.783025	0.677108	0.673008	0.710702	0.731232	0.785528	0.738195	1	0.874816	0.943486	0.696809
24.806	0.691489	0.702783	0.783025	0.67741	0.673008	0.711162	0.731232	0.785528	0.738195	1	0.876289	0.943486	0.69734
24.828	0.692021	0.703375	0.783025	0.678012	0.673232	0.711623	0.731499	0.785528	0.73872	1	0.876289	0.943486	0.69734
24.85	0.692553	0.703375	0.783025	0.678313	0.673456	0.712083	0.731766	0.785528	0.73872	1	0.876289	0.943486	0.697872
24.871	0.692553	0.703967	0.783663	0.678614	0.673679	0.712543	0.731766	0.785528	0.739244	1	0.877761	0.943486	0.698404
24.893	0.693085	0.704559	0.783663	0.678916	0.673679	0.712773	0.732033	0.785528	0.739244	1	0.877761	0.943486	0.698404
24.915	0.693617	0.705151	0.783663	0.679217	0.673903	0.713234	0.7323	0.785528	0.739244	1	0.879234	0.943486	0.698936
24.937	0.693617	0.705743	0.783663	0.679819	0.674127	0.713694	0.732567	0.785528	0.739769	1	0.879234	0.943486	0.699468
24.958	0.694149	0.706335	0.784301	0.68012	0.674351	0.714154	0.732567	0.785528	0.739769	1	0.879234	0.943486	0.7
24.98	0.694681	0.706335	0.784301	0.680422	0.674575	0.714614	0.732835	0.785528	0.740294	1	0.880707	0.942891	0.700532
25.002	0.694681	0.706927	0.784301	0.680723	0.674575	0.715075	0.733102	0.785528	0.740294	1	0.880707	0.942891	0.700532
25.024	0.695213	0.707519	0.784301	0.681325	0.674799	0.715535	0.733369	0.785528	0.740818	1	0.880707	0.942891	0.701064
25.045	0.695745	0.708111	0.784939	0.681627	0.675022	0.715995	0.733636	0.785528	0.740818	1	0.88218	0.942891	0.701596
25.067	0.695745	0.708703	0.784939	0.681928	0.675246	0.716226	0.733636	0.785528	0.741343	1	0.88218	0.942891	0.702128
25.089	0.696277	0.709295	0.784939	0.68253	0.675246	0.716686	0.733903	0.785528	0.741868	1	0.883652	0.942891	0.70266
25.111	0.696809	0.709888	0.785578	0.682831	0.67547	0.717146	0.73417	0.785528	0.741868	1	0.883652	0.942891	0.70266
25.132	0.69734	0.71048	0.785578	0.683133	0.675694	0.717606	0.734438	0.785528	0.742392	1	0.883652	0.942891	0.703191
25.154	0.69734	0.711072	0.785578	0.683735	0.675918	0.718067	0.734705	0.785528	0.742392	1	0.885125	0.942891	0.703723
25.176	0.697872	0.711664	0.786216	0.684036	0.676141	0.718527	0.734972	0.785528	0.742917	1	0.885125	0.942891	0.704255
25.198	0.698404	0.712256	0.786216	0.684639	0.676141	0.718987	0.735239	0.785528	0.742917	1	0.885125	0.942296	0.704787
25.219	0.698404	0.712848	0.786216	0.68494	0.676365	0.719448	0.735239	0.785528	0.743442	1	0.886598	0.942296	0.704787
25.241	0.698936	0.71344	0.786854	0.685241	0.676589	0.719908	0.735506	0.785528	0.743442	1	0.886598	0.942296	0.705319
25.263	0.699468	0.714032	0.786854	0.685843	0.676813	0.720368	0.735773	0.785528	0.743966	1	0.886598	0.942296	0.705851
25.285	0.7	0.714624	0.786854	0.686145	0.676813	0.720829	0.736041	0.785528	0.743966	1	0.886598	0.942296	0.706383
25.306	0.700532	0.715216	0.787492	0.686747	0.677037	0.721289	0.736308	0.785528	0.744491	1	0.888071	0.942296	0.706915
25.328	0.700532	0.715808	0.787492	0.687048	0.677261	0.721749	0.736575	0.785528	0.745016	1	0.888071	0.942296	0.707447
25.35	0.701064	0.7164	0.787492	0.687651	0.677484	0.722209	0.736842	0.785528	0.745016	1	0.888071	0.942296	0.707979
25.372	0.701596	0.716992	0.78813	0.687952	0.677484	0.72267	0.737109	0.78618	0.74554	1	0.889543	0.942296	0.708511
25.393	0.702128	0.717584	0.78813	0.688554	0.677708	0.72313	0.737376	0.78618	0.74554	1	0.889543	0.941701	0.708511
25.415	0.70266	0.718176	0.78813	0.688855	0.677932	0.72382	0.737644	0.78618	0.746065	1	0.889543	0.941701	0.709043
25.437	0.70266	0.718769	0.788768	0.689458	0.677932	0.724281	0.738178	0.78618	0.746065	1	0.889543	0.941701	0.709574
25.458	0.703191	0.719361	0.788768	0.689759	0.678156	0.724741	0.738445	0.78618	0.74659	1	0.891016	0.941701	0.710106
25.48	0.703723	0.719953	0.788768	0.690361	0.67838	0.725201	0.738712	0.78618	0.747114	1	0.891016	0.941701	0.710638
25.502	0.704255	0.721137	0.789407	0.690663	0.67838	0.725662	0.738979	0.78618	0.747114	1	0.891016	0.941701	0.71117
25.524	0.704787	0.721729	0.789407	0.691265	0.678603	0.726122	0.739247	0.78618	0.747639	1	0.891016	0.941701	0.711702
25.545	0.704787	0.722321	0.790045	0.691867	0.678827	0.726582	0.739514	0.78618	0.747639	1	0.892489	0.941701	0.712234
25.567	0.705319	0.722913	0.790045	0.692169	0.678827	0.727043	0.739781	0.78618	0.748164	1	0.892489	0.941701	0.712766
25.589	0.705851	0.723505	0.790045	0.692771	0.679051	0.727503	0.740048	0.78618	0.748688	1	0.892489	0.941106	0.713298
25.611	0.706383	0.724097	0.790683	0.693072	0.679275	0.727963	0.740582	0.78618	0.748688	1	0.892489	0.941106	0.71383
25.632	0.706915	0.725281	0.790683	0.693675	0.679275	0.728654	0.74085	0.78618	0.749213	1	0.893962	0.941106	0.714362
25.654	0.707447	0.725873	0.791321	0.694277	0.679499	0.729114	0.741117	0.78618	0.749738	1	0.893962	0.941106	0.714362
25.676	0.707979	0.726465	0.791321	0.694578	0.679499	0.729574	0.741384	0.78618	0.749738	1	0.893962	0.941106	0.714894
25.698	0.708511	0.727057	0.791321	0.695181	0.679722	0.730035	0.741918	0.78618	0.750262	1	0.893962	0.941106	0.715426
25.719	0.708511	0.727649	0.791959	0.695482	0.679722	0.730495	0.742185	0.78618	0.750262	1	0.893962	0.941106	0.715957
25.741	0.709043	0.728834	0.791959	0.696084	0.679946	0.730955	0.742453	0.78618	0.750787	1	0.893962	0.941106	0.716489
25.763	0.709574	0.729426	0.792597	0.696687	0.679946	0.731646	0.74272	0.786832	0.751312	1	0.895434	0.941106	0.717021
25.785	0.710106	0.730018	0.792597	0.696988	0.68017	0.732106	0.743254	0.786832	0.751312	1	0.895434	0.941106	0.717553
25.806	0.710638	0.73061	0.793235	0.69759	0.680394	0.732566	0.743521	0.786832	0.751836	1	0.895434	0.941106	0.718085
25.828	0.71117	0.731794	0.793235	0.698193	0.680394	0.733026	0.743788	0.786832	0.752361	1	0.895434	0.940512	0.718617
25.85	0.711702	0.732386	0.793874	0.698494	0.680394	0.733487	0.744323	0.786832	0.752361	1	0.895434	0.940512	0.719149
25.872	0.712234	0.732978	0.793874	0.699096	0.680618	0.733947	0.74459	0.786832	0.752886	1	0.895434	0.940512	0.719681
25.893	0.712766	0.734162	0.793874	0.699699	0.680618	0.734638	0.745124	0.786832	0.75341	1	0.895434	0.940512	0.720213
25.915	0.713298	0.734754	0.794512	0.7	0.680842	0.735098	0.745391	0.786832	0.75341	1	0.895434	0.940512	0.720745
25.937	0.71383	0.735346	0.794512	0.700602	0.680842	0.735558	0.745659	0.786832	0.753935	1	0.896907	0.940512	0.721277
25.959	0.714362	0.73653	0.79515	0.701205	0.681065	0.736018	0.746193	0.786832	0.75446	1	0.896907	0.940512	0.721809
25.98	0.714362	0.737123	0.79515	0.701506	0.681065	0.736479	0.74646	0.787484	0.754984	1	0.896907	0.940512	0.72234
26.002	0.714894	0.737715	0.795788	0.702108	0.681065	0.737169	0.746994	0.787484	0.754984	1	0.896907	0.940512	0.722872
26.024	0.715426	0.738899	0.795788	0.702711	0.681289	0.737629	0.747262	0.787484	0.755509	1	0.896907	0.940512	0.723404
26.046	0.715957	0.739491	0.796426	0.703313	0.681289	0.73809	0.747796	0.787484	0.756034	1	0.896907	0.940512	0.723936
26.067	0.716489	0.740083	0.796426	0.703614	0.681513	0.73855	0.748063	0.787484	0.756034	1	0.896907	0.939917	0.724468
26.089	0.717021	0.741267	0.797064	0.704217	0.681513	0.73901	0.748597	0.787484	0.756558	1	0.896907	0.939917	0.725
26.111	0.717553	0.741859	0.797064	0.704819	0.681513	0.739471	0.748865	0.787484	0.757083	1	0.896907	0.939917	0.726064
26.133	0.718085	0.742451	0.797703	0.70512	0.681737	0.740161	0.749399	0.787484	0.757083	1	0.896907	0.939917	0.726596
26.154	0.718617	0.743635	0.797703	0.705723	0.681737	0.740621	0.749666	0.788136	0.757608	1	0.896907	0.939917	0.727128
26.176	0.719149	0.744227	0.798341	0.706325	0.681737	0.741082	0.7502	0.788136	0.758132	1	0.896907	0.939917	0.72766
26.198	0.719681	0.744819	0.798341	0.706627	0.681961	0.741542	0.750468	0.788136	0.758657	1	0.896907	0.939917	0.728191
26.22	0.720213	0.746004	0.798979	0.707229	0.681961	0.742002	0.751002	0.788136	0.758657	1	0.896907	0.939917	0.728723
26.241	0.720745	0.746596	0.798979	0.707831	0.681961	0.742463	0.751269	0.788136	0.759182	1	0.896907	0.939917	0.729255
26.263	0.721277	0.74778	0.799617	0.708434	0.682184	0.742923	0.751803	0.788136	0.759706	1	0.896907	0.939917	0.729787
26.285	0.721809	0.748372	0.799617	0.708735	0.682184	0.743383	0.752338	0.788136	0.759706	1	0.896907	0.939917	0.730319
26.307	0.72234	0.748964	0.800255	0.709337	0.682184	0.743843	0.752605	0.788787	0.760231	1	0.896907	0.939917	0.730851
26.328	0.722872	0.750148	0.800255	0.70994	0.682408	0.744304	0.753139	0.788787	0.760756	1	0.896907	0.939917	0.731383
26.35	0.723404	0.75074	0.800893	0.710241	0.682408	0.744994	0.753406	0.788787	0.76128	1	0.896907	0.939917	0.731915
26.372	0.723936	0.751924	0.801532	0.710843	0.682408	0.745455	0.753941	0.788787	0.76128	1	0.896907	0.939917	0.732447
26.394	0.724468	0.752516	0.801532	0.711446	0.682632	0.745915	0.754475	0.788787	0.761805	1	0.896907	0.939917	0.733511
26.415	0.725	0.753108	0.80217	0.711747	0.682632	0.746145	0.754742	0.788787	0.762329	1	0.896907	0.939917	0.734043
26.437	0.726064	0.754292	0.80217	0.712349	0.682632	0.746605	0.755277	0.789439	0.762854	1	0.896907	0.939917	0.734574
26.459	0.726596	0.754885	0.802808	0.712952	0.682856	0.747066	0.755811	0.789439	0.762854	1	0.896907	0.939322	0.735106
26.481	0.727128	0.756069	0.802808	0.713253	0.682856	0.747526	0.756078	0.789439	0.763379	1	0.896907	0.939322	0.735638
26.502	0.72766	0.756661	0.803446	0.713855	0.682856	0.747986	0.756612	0.789439	0.763903	1	0.896907	0.939322	0.73617
26.524	0.728191	0.757845	0.803446	0.714458	0.68308	0.748446	0.757147	0.789439	0.763903	1	0.896907	0.939322	0.736702
26.546	0.728723	0.758437	0.804084	0.714759	0.68308	0.748907	0.757414	0.790091	0.764428	1	0.896907	0.939322	0.737234
26.568	0.729255	0.759029	0.804084	0.715361	0.68308	0.749367	0.757948	0.790091	0.764953	1	0.896907	0.939322	0.737766
26.589	0.729787	0.760213	0.804722	0.715964	0.683303	0.749597	0.758483	0.790091	0.765477	1	0.89838	0.939322	0.738298
26.611	0.730319	0.760805	0.805361	0.716265	0.683303	0.750058	0.75875	0.790091	0.765477	1	0.89838	0.939322	0.73883
26.633	0.730851	0.761989	0.805361	0.716867	0.683303	0.750518	0.759284	0.790091	0.766002	1	0.89838	0.939322	0.739894
26.655	0.731383	0.762581	0.805999	0.71747	0.683527	0.750978	0.759818	0.790743	0.766527	1	0.89838	0.939322	0.740426
26.676	0.731915	0.763173	0.805999	0.717771	0.683527	0.751208	0.760353	0.790743	0.767051	1	0.89838	0.939322	0.740957
26.698	0.732447	0.764358	0.806637	0.718373	0.683751	0.751669	0.76062	0.790743	0.767051	1	0.89838	0.939322	0.741489
26.72	0.733511	0.76495	0.806637	0.718976	0.683751	0.752129	0.761154	0.790743	0.767576	1	0.89838	0.939322	0.742021
26.742	0.734043	0.766134	0.807275	0.719277	0.683751	0.752359	0.761688	0.791395	0.768101	1	0.89838	0.939322	0.742553
26.763	0.734574	0.766726	0.807275	0.71988	0.683975	0.752819	0.762223	0.791395	0.768101	1	0.89838	0.939322	0.743085
26.785	0.735106	0.76791	0.807913	0.720482	0.683975	0.753049	0.76249	0.791395	0.768625	1	0.89838	0.939322	0.743617
26.807	0.735638	0.768502	0.808551	0.720783	0.684199	0.75351	0.763024	0.791395	0.76915	1	0.89838	0.939322	0.744149
26.829	0.73617	0.769094	0.808551	0.721386	0.684199	0.75374	0.763559	0.792047	0.769675	1	0.89838	0.939322	0.744681
26.85	0.736702	0.770278	0.80919	0.721687	0.684199	0.7542	0.763826	0.792047	0.769675	1	0.89838	0.939322	0.745213
26.872	0.737234	0.77087	0.80919	0.722289	0.684423	0.75443	0.76436	0.792047	0.770199	1	0.89838	0.939917	0.745745
26.894	0.737766	0.771462	0.809828	0.722892	0.684423	0.754891	0.764894	0.792047	0.770724	1	0.89838	0.939917	0.746277
26.916	0.738298	0.772647	0.809828	0.723193	0.684646	0.755121	0.765429	0.792699	0.771249	1	0.89838	0.939917	0.746809
26.937	0.73883	0.773239	0.810466	0.723795	0.684646	0.755351	0.765696	0.792699	0.771249	1	0.89838	0.939917	0.74734
26.959	0.739894	0.774423	0.810466	0.724096	0.68487	0.755811	0.76623	0.792699	0.771773	1	0.899853	0.939917	0.748404
26.981	0.740426	0.775015	0.811104	0.724699	0.68487	0.756041	0.766765	0.793351	0.772298	1	0.899853	0.939917	0.748936
27.003	0.740957	0.775607	0.811742	0.725301	0.685094	0.756272	0.767299	0.793351	0.772298	1	0.899853	0.939917	0.749468
27.024	0.741489	0.776791	0.811742	0.725602	0.685094	0.756502	0.767566	0.793351	0.772823	1	0.899853	0.939917	0.75
27.046	0.742021	0.777383	0.81238	0.726205	0.685318	0.756962	0.7681	0.793351	0.773347	1	0.899853	0.939917	0.750532
27.068	0.742553	0.777975	0.81238	0.726506	0.685318	0.757192	0.768635	0.794003	0.773872	1	0.899853	0.939917	0.751064
27.09	0.743085	0.779159	0.813019	0.727108	0.685542	0.757422	0.769169	0.794003	0.773872	1	0.899853	0.939917	0.751596
27.111	0.743617	0.779751	0.813019	0.72741	0.685542	0.757652	0.769436	0.794003	0.774397	1	0.901325	0.939917	0.752128
27.133	0.744149	0.780343	0.813657	0.728012	0.685765	0.757883	0.769971	0.794654	0.774921	1	0.901325	0.939917	0.75266
27.155	0.744681	0.781528	0.813657	0.728313	0.685989	0.758113	0.770505	0.794654	0.774921	1	0.901325	0.939917	0.753191
27.177	0.745213	0.78212	0.814295	0.728916	0.685989	0.758343	0.770772	0.794654	0.775446	1	0.901325	0.939917	0.753723
27.198	0.745745	0.782712	0.814933	0.729217	0.686213	0.758573	0.771306	0.795306	0.775971	1	0.901325	0.939917	0.754255
27.22	0.746277	0.783304	0.814933	0.729819	0.686213	0.758803	0.771841	0.795306	0.775971	1	0.901325	0.939917	0.754255
27.242	0.746809	0.784488	0.815571	0.730422	0.686437	0.759033	0.772108	0.795306	0.776495	1	0.902798	0.940512	0.754787
27.264	0.74734	0.78508	0.815571	0.730723	0.686661	0.759033	0.772642	0.795958	0.77702	1	0.902798	0.940512	0.755319
27.285	0.748404	0.785672	0.816209	0.731325	0.686661	0.759264	0.773177	0.795958	0.77702	1	0.902798	0.940512	0.755851
27.307	0.748936	0.786856	0.816209	0.731627	0.686885	0.759494	0.773444	0.795958	0.777545	1	0.902798	0.940512	0.756383
27.329	0.749468	0.787448	0.816847	0.732229	0.686885	0.759724	0.773978	0.79661	0.778069	1	0.904271	0.940512	0.756915
27.35	0.75	0.78804	0.816847	0.73253	0.687108	0.759954	0.774512	0.79661	0.778594	1	0.904271	0.940512	0.757447
27.372	0.750532	0.788632	0.817486	0.733133	0.687332	0.759954	0.77478	0.79661	0.778594	1	0.904271	0.940512	0.757979
27.394	0.751064	0.789224	0.817486	0.733434	0.687332	0.760184	0.775314	0.797262	0.779119	1	0.905744	0.940512	0.758511
27.416	0.751596	0.790409	0.818124	0.733735	0.687556	0.760414	0.775848	0.797262	0.779643	1	0.905744	0.940512	0.759043
27.437	0.752128	0.791001	0.818762	0.734337	0.68778	0.760414	0.776115	0.797262	0.779643	1	0.905744	0.941106	0.759574
27.459	0.75266	0.791593	0.818762	0.734639	0.688004	0.760644	0.77665	0.797914	0.780168	1	0.905744	0.941106	0.759574
27.481	0.753191	0.792185	0.8194	0.735241	0.688004	0.760644	0.776917	0.797914	0.780693	1	0.907216	0.941106	0.760106
27.503	0.753723	0.792777	0.8194	0.735542	0.688227	0.760875	0.777451	0.797914	0.780693	1	0.907216	0.941106	0.760638
27.524	0.754255	0.793961	0.820038	0.736145	0.688451	0.760875	0.777718	0.798566	0.781217	1	0.907216	0.941106	0.76117
27.546	0.754255	0.794553	0.820038	0.736446	0.688451	0.761105	0.778253	0.798566	0.781742	1	0.908689	0.941106	0.761702
27.568	0.754787	0.795145	0.820676	0.736747	0.688675	0.761105	0.77852	0.799218	0.781742	1	0.908689	0.941106	0.762234
27.59	0.755319	0.795737	0.820676	0.737349	0.688899	0.761335	0.779054	0.799218	0.782267	1	0.908689	0.941106	0.762234
27.611	0.755851	0.796329	0.821315	0.737651	0.689123	0.761335	0.779321	0.799218	0.782267	1	0.910162	0.941701	0.762766
27.633	0.756383	0.796921	0.821315	0.738253	0.689346	0.761565	0.779856	0.79987	0.782791	1	0.910162	0.941701	0.763298
27.655	0.756915	0.797513	0.821953	0.738554	0.689346	0.761565	0.780123	0.79987	0.783316	1	0.910162	0.941701	0.76383
27.677	0.757447	0.798697	0.821953	0.738855	0.68957	0.761795	0.780657	0.800522	0.783316	1	0.911635	0.941701	0.76383
27.698	0.757979	0.79929	0.822591	0.739458	0.689794	0.761795	0.780924	0.800522	0.783841	1	0.911635	0.941701	0.764362
27.72	0.758511	0.799882	0.822591	0.739759	0.690018	0.761795	0.781459	0.800522	0.784365	1	0.913108	0.941701	0.764894
27.742	0.759043	0.800474	0.823229	0.74006	0.690242	0.762025	0.781726	0.801173	0.784365	1	0.913108	0.942296	0.765426
27.764	0.759574	0.801066	0.823229	0.740663	0.690466	0.762025	0.781993	0.801173	0.78489	1	0.913108	0.942296	0.765426
27.785	0.759574	0.801658	0.823867	0.740964	0.690466	0.762025	0.782527	0.801825	0.785414	1	0.91458	0.942296	0.765957
27.807	0.760106	0.80225	0.823867	0.741265	0.690689	0.762255	0.782795	0.801825	0.785414	1	0.91458	0.942296	0.766489
27.829	0.760638	0.802842	0.824505	0.741566	0.690913	0.762255	0.783062	0.801825	0.785939	1	0.91458	0.942296	0.766489
27.851	0.76117	0.803434	0.824505	0.742169	0.691137	0.762255	0.783596	0.802477	0.786464	1	0.916053	0.942296	0.767021
27.872	0.761702	0.804026	0.825144	0.74247	0.691361	0.762255	0.783863	0.802477	0.786464	1	0.916053	0.942891	0.767553
27.894	0.762234	0.804618	0.825144	0.742771	0.691585	0.762486	0.78413	0.803129	0.786988	1	0.917526	0.942891	0.767553
27.916	0.762234	0.80521	0.825782	0.743373	0.691808	0.762486	0.784665	0.803129	0.786988	1	0.917526	0.942891	0.768085
27.938	0.762766	0.805802	0.825782	0.743675	0.691808	0.762486	0.784932	0.803781	0.787513	1	0.917526	0.942891	0.768617
27.959	0.763298	0.806394	0.82642	0.743976	0.692032	0.762716	0.785199	0.803781	0.788038	1	0.918999	0.942891	0.768617
27.981	0.76383	0.806986	0.82642	0.744277	0.692256	0.762716	0.785466	0.803781	0.788038	1	0.918999	0.943486	0.769149
28.003	0.76383	0.807578	0.827058	0.744578	0.69248	0.762716	0.785733	0.804433	0.788562	1	0.920471	0.943486	0.769149
28.025	0.764362	0.808171	0.827058	0.745181	0.692704	0.762716	0.786268	0.804433	0.788562	1	0.920471	0.943486	0.769681
28.046	0.764894	0.808763	0.827696	0.745482	0.692927	0.762946	0.786535	0.805085	0.789087	1	0.920471	0.943486	0.769681
28.068	0.765426	0.809355	0.827696	0.745783	0.693151	0.762946	0.786802	0.805085	0.789612	1	0.921944	0.943486	0.770213
28.09	0.765426	0.809947	0.828334	0.746084	0.693375	0.762946	0.787069	0.805737	0.789612	1	0.921944	0.944081	0.770745
28.112	0.765957	0.810539	0.828334	0.746386	0.693599	0.763176	0.787336	0.805737	0.790136	1	0.921944	0.944081	0.770745
28.133	0.766489	0.811131	0.828973	0.746687	0.693823	0.763176	0.787604	0.805737	0.790136	1	0.923417	0.944081	0.771277
28.155	0.766489	0.811723	0.828973	0.746988	0.694047	0.763176	0.787871	0.806389	0.790661	1	0.923417	0.944081	0.771277
28.177	0.767021	0.811723	0.828973	0.747289	0.694047	0.763406	0.788138	0.806389	0.791186	1	0.92489	0.944676	0.771809
28.199	0.767553	0.812315	0.829611	0.74759	0.69427	0.763406	0.788405	0.80704	0.791186	1	0.92489	0.944676	0.771809
28.22	0.767553	0.812907	0.829611	0.747892	0.694494	0.763406	0.788672	0.80704	0.79171	1	0.92489	0.944676	0.771809
28.242	0.768085	0.813499	0.830249	0.748193	0.694718	0.763636	0.788939	0.807692	0.79171	1	0.926362	0.944676	0.77234
28.264	0.768617	0.814091	0.830249	0.748795	0.694942	0.763636	0.789207	0.807692	0.792235	1	0.926362	0.944676	0.77234
28.286	0.768617	0.814683	0.830887	0.749096	0.695166	0.763636	0.789474	0.808344	0.792235	1	0.926362	0.945271	0.772872
28.307	0.769149	0.815275	0.830887	0.749398	0.695389	0.763867	0.789474	0.808344	0.79276	1	0.927835	0.945271	0.772872
28.329	0.769149	0.815867	0.831525	0.749398	0.695613	0.763867	0.789741	0.808996	0.793284	1	0.927835	0.945271	0.773404
28.351	0.769681	0.815867	0.831525	0.749699	0.695837	0.763867	0.790008	0.808996	0.793284	1	0.927835	0.945866	0.773404
28.373	0.769681	0.816459	0.832163	0.75	0.695837	0.764097	0.790275	0.808996	0.793809	1	0.929308	0.945866	0.773404
28.394	0.770213	0.817052	0.832163	0.750301	0.696061	0.764097	0.790542	0.809648	0.793809	1	0.929308	0.945866	0.773936
28.416	0.770745	0.817644	0.832163	0.750602	0.696285	0.764327	0.790542	0.809648	0.794334	1	0.929308	0.945866	0.773936
28.438	0.770745	0.818236	0.832802	0.750904	0.696509	0.764327	0.79081	0.8103	0.794334	1	0.930781	0.94646	0.774468
28.46	0.771277	0.818236	0.832802	0.751205	0.696732	0.764557	0.791077	0.8103	0.794858	1	0.930781	0.94646	0.774468
28.481	0.771277	0.818828	0.83344	0.751506	0.696956	0.764557	0.791077	0.810952	0.794858	1	0.930781	0.94646	0.774468
28.503	0.771809	0.81942	0.83344	0.751807	0.69718	0.764557	0.791344	0.810952	0.795383	1	0.932253	0.94646	0.775
28.525	0.771809	0.820012	0.834078	0.752108	0.69718	0.764787	0.791611	0.811604	0.795383	1	0.932253	0.947055	0.775
28.547	0.771809	0.820012	0.834078	0.752108	0.697404	0.764787	0.791611	0.811604	0.795908	1	0.932253	0.947055	0.775
28.568	0.77234	0.820604	0.834078	0.75241	0.697628	0.765017	0.791878	0.812256	0.795908	1	0.933726	0.947055	0.775532
28.59	0.77234	0.821196	0.834716	0.752711	0.697851	0.765017	0.791878	0.812256	0.796432	1	0.933726	0.94765	0.775532
28.612	0.772872	0.821788	0.834716	0.753012	0.698075	0.765247	0.792145	0.812256	0.796957	1	0.933726	0.94765	0.775532
28.634	0.772872	0.821788	0.835354	0.753012	0.698075	0.765247	0.792145	0.812907	0.796957	1	0.935199	0.94765	0.775532
28.655	0.773404	0.82238	0.835354	0.753313	0.698299	0.765478	0.792413	0.812907	0.797482	1	0.935199	0.948245	0.776064
28.677	0.773404	0.822972	0.835354	0.753614	0.698523	0.765478	0.792413	0.813559	0.797482	1	0.935199	0.948245	0.776064
28.699	0.773404	0.823564	0.835992	0.753916	0.698747	0.765708	0.79268	0.813559	0.798006	1	0.935199	0.948245	0.776064
28.721	0.773936	0.823564	0.835992	0.753916	0.69897	0.765708	0.79268	0.814211	0.798006	1	0.936672	0.94884	0.776064
28.742	0.773936	0.824156	0.836631	0.754217	0.69897	0.765938	0.79268	0.814211	0.798531	1	0.936672	0.94884	0.776596
28.764	0.774468	0.824748	0.836631	0.754217	0.699194	0.765938	0.792947	0.814863	0.798531	1	0.936672	0.94884	0.776596
28.786	0.774468	0.824748	0.836631	0.754518	0.699418	0.766168	0.792947	0.814863	0.799056	1	0.938144	0.949435	0.776596
28.808	0.774468	0.82534	0.837269	0.754819	0.699418	0.766398	0.792947	0.815515	0.799056	1	0.938144	0.949435	0.776596
28.829	0.775	0.825933	0.837269	0.754819	0.699642	0.766398	0.793214	0.815515	0.799056	1	0.938144	0.949435	0.777128
28.851	0.775	0.825933	0.837907	0.75512	0.699866	0.766628	0.793214	0.815515	0.79958	1	0.938144	0.95003	0.777128
28.873	0.775	0.826525	0.837907	0.75512	0.70009	0.766628	0.793214	0.816167	0.79958	1	0.939617	0.95003	0.777128
28.895	0.775532	0.826525	0.837907	0.755422	0.70009	0.766858	0.793214	0.816167	0.800105	1	0.939617	0.95003	0.777128
28.916	0.775532	0.827117	0.838545	0.755422	0.700313	0.766858	0.793481	0.816819	0.800105	1	0.939617	0.950625	0.777128
28.938	0.775532	0.827709	0.838545	0.755723	0.700537	0.767089	0.793481	0.816819	0.80063	1	0.939617	0.950625	0.777128
28.96	0.775532	0.827709	0.839183	0.755723	0.700537	0.767319	0.793481	0.817471	0.80063	1	0.94109	0.950625	0.77766
28.982	0.776064	0.828301	0.839183	0.756024	0.700761	0.767319	0.793481	0.817471	0.801154	1	0.94109	0.95122	0.77766
29.003	0.776064	0.828893	0.839183	0.756024	0.700985	0.767549	0.793481	0.818123	0.801154	1	0.94109	0.95122	0.77766
29.025	0.776064	0.828893	0.839821	0.756325	0.700985	0.767549	0.793481	0.818123	0.801679	1	0.94109	0.951814	0.77766
29.047	0.776064	0.829485	0.839821	0.756325	0.701209	0.767779	0.793481	0.818123	0.801679	1	0.942563	0.951814	0.77766
29.069	0.776596	0.829485	0.839821	0.756627	0.701432	0.768009	0.793481	0.818774	0.802204	1	0.942563	0.951814	0.77766
29.09	0.776596	0.830077	0.840459	0.756627	0.701432	0.768009	0.793481	0.818774	0.802204	1	0.942563	0.952409	0.77766
29.112	0.776596	0.830077	0.840459	0.756627	0.701656	0.768239	0.793481	0.819426	0.802204	1	0.942563	0.952409	0.778191
29.134	0.776596	0.830669	0.840459	0.756928	0.70188	0.768239	0.793481	0.819426	0.802728	1	0.942563	0.953004	0.778191
29.155	0.777128	0.830669	0.841098	0.756928	0.70188	0.76847	0.793481	0.820078	0.802728	1	0.944035	0.953004	0.778191
29.177	0.777128	0.831261	0.841098	0.757229	0.702104	0.7687	0.793481	0.820078	0.803253	1	0.944035	0.953004	0.778191
29.199	0.777128	0.831261	0.841098	0.757229	0.702104	0.7687	0.793481	0.820078	0.803253	1	0.944035	0.953599	0.778191
29.221	0.777128	0.831853	0.841736	0.757229	0.702328	0.76893	0.793481	0.82073	0.803778	1	0.944035	0.953599	0.778191
29.242	0.777128	0.831853	0.841736	0.757229	0.702328	0.76893	0.793481	0.82073	0.803778	1	0.944035	0.954194	0.778191
29.264	0.777128	0.832445	0.841736	0.75753	0.702551	0.76916	0.793481	0.821382	0.803778	1	0.945508	0.954194	0.778191
29.286	0.77766	0.832445	0.842374	0.75753	0.702775	0.76939	0.793481	0.821382	0.804302	1	0.945508	0.954194	0.778191
29.308	0.77766	0.833037	0.842374	0.75753	0.702775	0.76939	0.793481	0.822034	0.804302	1	0.945508	0.954789	0.778191
29.329	0.77766	0.833037	0.842374	0.757831	0.702999	0.76962	0.793481	0.822034	0.804827	1	0.945508	0.954789	0.778191
29.351	0.77766	0.833629	0.843012	0.757831	0.702999	0.76985	0.793481	0.822034	0.804827	1	0.945508	0.955384	0.778191
29.373	0.77766	0.833629	0.843012	0.757831	0.703223	0.76985	0.793481	0.822686	0.805352	1	0.945508	0.955384	0.778191
29.395	0.77766	0.834221	0.843012	0.757831	0.703223	0.770081	0.793481	0.822686	0.805352	1	0.946981	0.955979	0.778723
29.416	0.77766	0.834221	0.84365	0.757831	0.703447	0.770311	0.793481	0.823338	0.805352	1	0.946981	0.955979	0.778723
29.438	0.778191	0.834813	0.84365	0.758133	0.703447	0.770311	0.793214	0.823338	0.805876	1	0.946981	0.956573	0.778723
29.46	0.778191	0.834813	0.84365	0.758133	0.703671	0.770541	0.793214	0.823338	0.805876	1	0.946981	0.956573	0.778723
29.482	0.778191	0.835406	0.844288	0.758133	0.703671	0.770771	0.793214	0.82399	0.806401	1	0.946981	0.956573	0.778723
29.503	0.778191	0.835406	0.844288	0.758133	0.703894	0.770771	0.793214	0.82399	0.806401	1	0.946981	0.957168	0.778723
29.525	0.778191	0.835406	0.844288	0.758133	0.703894	0.771001	0.793214	0.82399	0.806401	1	0.946981	0.957168	0.778723
29.547	0.778191	0.835998	0.844927	0.758434	0.704118	0.771231	0.793214	0.824641	0.806925	1	0.948454	0.957763	0.778723
29.569	0.778191	0.835998	0.844927	0.758434	0.704118	0.771231	0.792947	0.824641	0.806925	1	0.948454	0.957763	0.778723
29.59	0.778191	0.83659	0.844927	0.758434	0.704118	0.771461	0.792947	0.825293	0.806925	1	0.948454	0.958358	0.778723
29.612	0.778191	0.83659	0.845565	0.758434	0.704342	0.771692	0.792947	0.825293	0.80745	1	0.948454	0.958358	0.778723
29.634	0.778191	0.83659	0.845565	0.758434	0.704342	0.771922	0.792947	0.825293	0.80745	1	0.948454	0.958953	0.778723
29.656	0.778191	0.837182	0.845565	0.758434	0.704566	0.771922	0.792947	0.825945	0.807975	1	0.948454	0.958953	0.778723
29.677	0.778191	0.837182	0.845565	0.758434	0.704566	0.772152	0.79268	0.825945	0.807975	1	0.948454	0.959548	0.778723
29.699	0.778191	0.837774	0.846203	0.758735	0.704566	0.772382	0.79268	0.825945	0.807975	1	0.949926	0.959548	0.778723
29.721	0.778723	0.837774	0.846203	0.758735	0.70479	0.772382	0.79268	0.826597	0.808499	1	0.949926	0.960143	0.778723
29.743	0.778723	0.837774	0.846203	0.758735	0.70479	0.772612	0.79268	0.826597	0.808499	1	0.949926	0.960143	0.778723
29.764	0.778723	0.838366	0.846203	0.758735	0.70479	0.772842	0.79268	0.826597	0.808499	1	0.949926	0.960738	0.778191
29.786	0.778723	0.838366	0.846841	0.758735	0.705013	0.773072	0.792413	0.827249	0.809024	1	0.949926	0.960738	0.778191
29.808	0.778723	0.838366	0.846841	0.758735	0.705013	0.773072	0.792413	0.827249	0.809024	1	0.949926	0.961333	0.778191
29.83	0.778723	0.838958	0.846841	0.758735	0.705013	0.773303	0.792413	0.827249	0.809024	1	0.949926	0.961333	0.778191
29.851	0.778723	0.838958	0.847479	0.758735	0.705013	0.773533	0.792413	0.827901	0.809549	1	0.949926	0.961927	0.778191
29.873	0.778723	0.838958	0.847479	0.758735	0.705237	0.773763	0.792145	0.827901	0.809549	1	0.949926	0.961927	0.778191
29.895	0.778723	0.83955	0.847479	0.758735	0.705237	0.773763	0.792145	0.827901	0.809549	1	0.951399	0.961927	0.778191
29.917	0.778723	0.83955	0.847479	0.759036	0.705237	0.773993	0.792145	0.828553	0.810073	1	0.951399	0.962522	0.778191
29.938	0.778723	0.83955	0.848117	0.759036	0.705237	0.774223	0.792145	0.828553	0.810073	1	0.951399	0.962522	0.778191
29.96	0.778723	0.840142	0.848117	0.759036	0.705237	0.774453	0.792145	0.828553	0.810073	1	0.951399	0.963117	0.778191
29.982	0.778723	0.840142	0.848117	0.759036	0.705237	0.774684	0.791878	0.828553	0.810598	1	0.951399	0.963117	0.778191
30.004	0.778723	0.840142	0.848117	0.759036	0.705461	0.774684	0.791878	0.829205	0.810598	1	0.951399	0.963712	0.778191
30.025	0.778723	0.840142	0.848756	0.759036	0.705461	0.774914	0.791878	0.829205	0.810598	1	0.951399	0.963712	0.778191
30.047	0.778723	0.840734	0.848756	0.759036	0.705461	0.775144	0.791878	0.829205	0.810598	1	0.951399	0.964307	0.778191
30.069	0.778723	0.840734	0.848756	0.759036	0.705461	0.775374	0.791611	0.829205	0.811123	1	0.951399	0.964307	0.778191
30.091	0.778191	0.840734	0.848756	0.759036	0.705461	0.775604	0.791611	0.829857	0.811123	1	0.951399	0.964902	0.77766
30.112	0.778191	0.841326	0.849394	0.759036	0.705461	0.775604	0.791611	0.829857	0.811123	1	0.952872	0.964902	0.77766
30.134	0.778191	0.841326	0.849394	0.759036	0.705461	0.775834	0.791611	0.829857	0.811647	1	0.952872	0.965497	0.77766
30.156	0.778191	0.841326	0.849394	0.759036	0.705461	0.776064	0.791611	0.829857	0.811647	1	0.952872	0.965497	0.77766
30.178	0.778191	0.841326	0.849394	0.759036	0.705461	0.776295	0.791344	0.830508	0.811647	1	0.952872	0.966092	0.77766
30.199	0.778191	0.841918	0.850032	0.759036	0.705461	0.776525	0.791344	0.830508	0.811647	1	0.952872	0.966092	0.77766
30.221	0.778191	0.841918	0.850032	0.759036	0.705237	0.776525	0.791344	0.830508	0.812172	1	0.952872	0.966686	0.77766
30.243	0.778191	0.841918	0.850032	0.759036	0.705237	0.776755	0.791344	0.830508	0.812172	1	0.952872	0.966686	0.77766
30.265	0.778191	0.84251	0.850032	0.759036	0.705237	0.776985	0.791077	0.83116	0.812172	1	0.952872	0.967281	0.77766
30.286	0.778191	0.84251	0.85067	0.759036	0.705237	0.777215	0.791077	0.83116	0.812172	1	0.952872	0.967281	0.777128
30.308	0.778191	0.84251	0.85067	0.759036	0.705237	0.777445	0.791077	0.83116	0.812172	1	0.952872	0.967876	0.777128
30.33	0.778191	0.84251	0.85067	0.759036	0.705013	0.777445	0.791077	0.83116	0.812697	0.999119	0.952872	0.967876	0.777128
30.352	0.778191	0.843102	0.85067	0.759036	0.705013	0.777675	0.791077	0.83116	0.812697	0.999119	0.952872	0.967876	0.777128
30.373	0.778191	0.843102	0.851308	0.759036	0.705013	0.777906	0.79081	0.831812	0.812697	0.999119	0.952872	0.968471	0.777128
30.395	0.778191	0.843102	0.851308	0.759036	0.705013	0.778136	0.79081	0.831812	0.812697	0.999119	0.952872	0.968471	0.777128
30.417	0.77766	0.843102	0.851308	0.759036	0.70479	0.778136	0.79081	0.831812	0.812697	0.999119	0.952872	0.969066	0.777128
30.439	0.77766	0.843694	0.851308	0.759036	0.70479	0.778366	0.79081	0.831812	0.813221	0.999119	0.952872	0.969066	0.776596
30.46	0.77766	0.843694	0.851308	0.759036	0.704566	0.778596	0.790542	0.831812	0.813221	0.999119	0.954345	0.969661	0.776596
30.482	0.77766	0.843694	0.851946	0.759036	0.704566	0.778826	0.790542	0.831812	0.813221	0.999119	0.954345	0.969661	0.776596
30.504	0.77766	0.843694	0.851946	0.759036	0.704566	0.778826	0.790542	0.832464	0.813221	0.999119	0.954345	0.969661	0.776596
30.526	0.77766	0.843694	0.851946	0.759036	0.704342	0.779056	0.790275	0.832464	0.813221	0.999119	0.954345	0.970256	0.776596
30.547	0.77766	0.844287	0.851946	0.759036	0.704342	0.779287	0.790275	0.832464	0.813221	0.999119	0.954345	0.970256	0.776596
30.569	0.77766	0.844287	0.852585	0.759036	0.704118	0.779287	0.790275	0.832464	0.813221	0.999119	0.954345	0.970851	0.776596
30.591	0.77766	0.844287	0.852585	0.759036	0.704118	0.779517	0.790275	0.832464	0.813746	0.999119	0.954345	0.970851	0.776064
30.613	0.777128	0.844287	0.852585	0.759036	0.703894	0.779747	0.790008	0.832464	0.813746	0.999119	0.954345	0.971446	0.776064
30.634	0.777128	0.844879	0.852585	0.759036	0.703894	0.779747	0.790008	0.832464	0.813746	0.999119	0.954345	0.971446	0.776064
30.656	0.777128	0.844879	0.853223	0.759036	0.703671	0.779977	0.790008	0.833116	0.813746	0.999119	0.952872	0.971446	0.776064
30.678	0.777128	0.844879	0.853223	0.759036	0.703447	0.779977	0.789741	0.833116	0.813746	0.998238	0.952872	0.97204	0.776064
30.7	0.777128	0.844879	0.853223	0.759036	0.703447	0.780207	0.789741	0.833116	0.813746	0.998238	0.952872	0.97204	0.775532
30.721	0.777128	0.844879	0.853223	0.759036	0.703223	0.780207	0.789741	0.833116	0.813746	0.998238	0.952872	0.97204	0.775532
30.743	0.777128	0.845471	0.853861	0.759036	0.702999	0.780437	0.789474	0.833116	0.813746	0.998238	0.952872	0.972635	0.775532
30.765	0.776596	0.845471	0.853861	0.759036	0.702999	0.780437	0.789474	0.833116	0.813746	0.998238	0.952872	0.972635	0.775532
30.787	0.776596	0.845471	0.853861	0.759036	0.702775	0.780667	0.789474	0.833116	0.814271	0.998238	0.952872	0.972635	0.775532
30.808	0.776596	0.845471	0.853861	0.759036	0.702551	0.780667	0.789207	0.833116	0.814271	0.998238	0.952872	0.97323	0.775
30.83	0.776596	0.845471	0.854499	0.759036	0.702328	0.780898	0.789207	0.833116	0.814271	0.998238	0.952872	0.97323	0.775
30.852	0.776596	0.845471	0.854499	0.759036	0.702328	0.780898	0.789207	0.833116	0.814271	0.998238	0.952872	0.97323	0.775
30.874	0.776596	0.846063	0.854499	0.758735	0.702104	0.781128	0.788939	0.833116	0.814271	0.998238	0.952872	0.973825	0.775
30.895	0.776596	0.846063	0.854499	0.758735	0.70188	0.781128	0.788939	0.833768	0.814271	0.998238	0.952872	0.973825	0.775
30.917	0.776064	0.846063	0.855137	0.758735	0.701656	0.781128	0.788939	0.833768	0.814271	0.997357	0.952872	0.973825	0.775
30.939	0.776064	0.846063	0.855137	0.758735	0.701432	0.781358	0.788672	0.833768	0.814271	0.997357	0.952872	0.97442	0.774468
30.96	0.776064	0.846063	0.855137	0.758735	0.701209	0.781358	0.788672	0.833768	0.814271	0.997357	0.952872	0.97442	0.774468
30.982	0.776064	0.846063	0.855137	0.758735	0.700985	0.781358	0.788405	0.833768	0.814271	0.997357	0.951399	0.97442	0.774468
31.004	0.776064	0.846655	0.855775	0.758735	0.700985	0.781358	0.788405	0.833768	0.814271	0.997357	0.951399	0.97442	0.774468
31.026	0.775532	0.846655	0.855775	0.758735	0.700761	0.781588	0.788405	0.833768	0.814271	0.997357	0.951399	0.975015	0.774468
31.047	0.775532	0.846655	0.855775	0.758735	0.700537	0.781588	0.788138	0.833768	0.814271	0.997357	0.951399	0.975015	0.773936
31.069	0.775532	0.846655	0.855775	0.758735	0.700313	0.781588	0.788138	0.833768	0.814271	0.997357	0.951399	0.975015	0.773936
31.091	0.775532	0.846655	0.856414	0.758434	0.70009	0.781588	0.787871	0.833768	0.814271	0.996476	0.951399	0.975015	0.773936
31.113	0.775532	0.846655	0.856414	0.758434	0.699866	0.781588	0.787871	0.833768	0.814271	0.996476	0.951399	0.97561	0.773936
31.134	0.775	0.846655	0.856414	0.758434	0.699642	0.781818	0.787604	0.833768	0.814271	0.996476	0.951399	0.97561	0.773936
31.156	0.775	0.846655	0.856414	0.758434	0.699418	0.781818	0.787604	0.833768	0.814271	0.996476	0.951399	0.97561	0.773936
31.178	0.775	0.846655	0.857052	0.758434	0.699194	0.781818	0.787336	0.833768	0.814271	0.996476	0.951399	0.97561	0.773404
31.2	0.775	0.847247	0.857052	0.758434	0.69897	0.781818	0.787336	0.833768	0.814271	0.996476	0.949926	0.976205	0.773404
31.221	0.775	0.847247	0.857052	0.758434	0.698747	0.781818	0.787336	0.833768	0.814271	0.996476	0.949926	0.976205	0.773404
31.243	0.775	0.847247	0.857052	0.758434	0.698523	0.781818	0.787069	0.833768	0.814271	0.996476	0.949926	0.976205	0.773404
31.265	0.774468	0.847247	0.85769	0.758133	0.698299	0.781818	0.787069	0.833768	0.814271	0.995595	0.949926	0.976205	0.773404
31.287	0.774468	0.847247	0.85769	0.758133	0.698075	0.781818	0.786802	0.833768	0.814271	0.995595	0.949926	0.976205	0.773404
31.308	0.774468	0.847247	0.85769	0.758133	0.697851	0.781818	0.786802	0.833768	0.814271	0.995595	0.949926	0.976205	0.772872
31.33	0.774468	0.847247	0.85769	0.758133	0.697628	0.781818	0.786535	0.833768	0.814271	0.995595	0.949926	0.9768	0.772872
31.352	0.774468	0.847247	0.858328	0.758133	0.697404	0.781818	0.786535	0.833768	0.814271	0.995595	0.949926	0.9768	0.772872
31.374	0.773936	0.847247	0.858328	0.758133	0.69718	0.782048	0.786268	0.833768	0.814271	0.995595	0.949926	0.9768	0.772872
31.395	0.773936	0.847247	0.858328	0.758133	0.696956	0.782048	0.786268	0.833768	0.814271	0.994714	0.949926	0.9768	0.772872
31.417	0.773936	0.847247	0.858328	0.757831	0.696732	0.782048	0.786001	0.833116	0.814271	0.994714	0.949926	0.9768	0.772872
31.439	0.773936	0.847247	0.858966	0.757831	0.696509	0.782048	0.786001	0.833116	0.814271	0.994714	0.949926	0.9768	0.772872
31.461	0.773936	0.847247	0.858966	0.757831	0.696285	0.782048	0.785733	0.833116	0.814271	0.994714	0.948454	0.9768	0.772872
31.482	0.773936	0.847247	0.858966	0.757831	0.696061	0.782048	0.785733	0.833116	0.813746	0.994714	0.948454	0.977394	0.77234
31.504	0.773404	0.847247	0.858966	0.757831	0.695837	0.782048	0.785733	0.833116	0.813746	0.994714	0.948454	0.977394	0.77234
31.526	0.773404	0.847247	0.859604	0.757831	0.695613	0.782048	0.785466	0.833116	0.813746	0.993833	0.948454	0.977394	0.77234
31.548	0.773404	0.847247	0.859604	0.75753	0.695389	0.782048	0.785466	0.833116	0.813746	0.993833	0.948454	0.977394	0.77234
31.569	0.773404	0.847247	0.859604	0.75753	0.695166	0.782048	0.785199	0.833116	0.813746	0.993833	0.948454	0.977394	0.77234
31.591	0.773404	0.847247	0.859604	0.75753	0.694942	0.782048	0.785199	0.833116	0.813746	0.993833	0.948454	0.977394	0.77234
31.613	0.773404	0.847247	0.860243	0.75753	0.694718	0.782048	0.784932	0.833116	0.813746	0.993833	0.948454	0.977394	0.77234
31.635	0.772872	0.847247	0.860243	0.75753	0.694494	0.782048	0.784932	0.833116	0.813746	0.992952	0.948454	0.977394	0.77234
31.656	0.772872	0.847247	0.860243	0.75753	0.69427	0.782278	0.784665	0.833116	0.813746	0.992952	0.948454	0.977394	0.77234
31.678	0.772872	0.847247	0.860243	0.757229	0.694047	0.782278	0.784665	0.832464	0.813746	0.992952	0.948454	0.977394	0.77234
31.7	0.772872	0.847247	0.860881	0.757229	0.693823	0.782278	0.784398	0.832464	0.813746	0.992952	0.948454	0.977394	0.77234
31.722	0.772872	0.847247	0.860881	0.757229	0.693823	0.782278	0.784398	0.832464	0.813746	0.992952	0.949926	0.977394	0.77234
31.743	0.772872	0.847247	0.860881	0.757229	0.693599	0.782278	0.784398	0.832464	0.813746	0.99207	0.949926	0.977394	0.77234
31.765	0.772872	0.847247	0.860881	0.757229	0.693375	0.782509	0.78413	0.832464	0.813221	0.99207	0.949926	0.977989	0.77234
31.787	0.772872	0.847247	0.861519	0.757229	0.693151	0.782509	0.78413	0.832464	0.813221	0.99207	0.949926	0.977989	0.77234
31.809	0.77234	0.847247	0.861519	0.757229	0.692927	0.782509	0.783863	0.832464	0.813221	0.99207	0.949926	0.977989	0.77234
31.83	0.77234	0.847247	0.861519	0.756928	0.692704	0.782739	0.783863	0.831812	0.813221	0.991189	0.949926	0.977989	0.77234
31.852	0.77234	0.846655	0.861519	0.756928	0.692704	0.782739	0.783596	0.831812	0.813221	0.991189	0.949926	0.977989	0.77234
31.874	0.77234	0.846655	0.861519	0.756928	0.69248	0.782739	0.783596	0.831812	0.813221	0.991189	0.949926	0.977989	0.77234
31.896	0.77234	0.846655	0.862157	0.756928	0.692256	0.782969	0.783596	0.831812	0.813221	0.991189	0.949926	0.977989	0.77234
31.917	0.77234	0.846655	0.862157	0.756928	0.692032	0.782969	0.783329	0.831812	0.813221	0.990308	0.951399	0.977989	0.77234
31.939	0.77234	0.846655	0.862157	0.756928	0.691808	0.783199	0.783329	0.831812	0.813221	0.990308	0.951399	0.977989	0.77234
31.961	0.77234	0.846655	0.862157	0.756928	0.691808	0.783199	0.783062	0.83116	0.813221	0.990308	0.951399	0.977989	0.77234
31.983	0.77234	0.846655	0.862795	0.756627	0.691585	0.783429	0.783062	0.83116	0.812697	0.990308	0.951399	0.977989	0.77234
32.004	0.77234	0.846655	0.862795	0.756627	0.691361	0.783659	0.783062	0.83116	0.812697	0.989427	0.951399	0.977989	0.77234
32.026	0.77234	0.846063	0.862795	0.756627	0.691361	0.783659	0.782795	0.83116	0.812697	0.989427	0.952872	0.977989	0.77234
32.048	0.77234	0.846063	0.862795	0.756627	0.691137	0.78389	0.782795	0.83116	0.812697	0.989427	0.952872	0.977989	0.77234
32.07	0.77234	0.846063	0.863433	0.756627	0.690913	0.78412	0.782527	0.83116	0.812697	0.989427	0.952872	0.977394	0.77234
32.091	0.77234	0.846063	0.863433	0.756627	0.690913	0.78412	0.782527	0.830508	0.812697	0.988546	0.952872	0.977394	0.77234
32.113	0.77234	0.846063	0.863433	0.756627	0.690689	0.78435	0.782527	0.830508	0.812697	0.988546	0.954345	0.977394	0.77234
32.135	0.77234	0.846063	0.863433	0.756627	0.690466	0.78458	0.78226	0.830508	0.812697	0.988546	0.954345	0.977394	0.77234
32.157	0.77234	0.845471	0.863433	0.756627	0.690466	0.78481	0.78226	0.830508	0.812697	0.987665	0.954345	0.977394	0.77234
32.178	0.77234	0.845471	0.864071	0.756325	0.690242	0.78504	0.78226	0.830508	0.812172	0.987665	0.955817	0.977394	0.77234
32.2	0.77234	0.845471	0.864071	0.756325	0.690242	0.78527	0.781993	0.829857	0.812172	0.987665	0.955817	0.977394	0.77234
32.222	0.77234	0.845471	0.864071	0.756325	0.690018	0.785501	0.781993	0.829857	0.812172	0.987665	0.955817	0.977394	0.772872
32.244	0.77234	0.845471	0.864071	0.756325	0.690018	0.785731	0.781993	0.829857	0.812172	0.986784	0.95729	0.977394	0.772872
32.265	0.77234	0.844879	0.86471	0.756325	0.689794	0.785961	0.781726	0.829857	0.812172	0.986784	0.95729	0.977394	0.772872
32.287	0.77234	0.844879	0.86471	0.756325	0.689794	0.786191	0.781726	0.829205	0.812172	0.986784	0.958763	0.977394	0.772872
32.309	0.77234	0.844879	0.86471	0.756325	0.68957	0.786421	0.781726	0.829205	0.812172	0.985903	0.958763	0.977394	0.772872
32.331	0.77234	0.844879	0.86471	0.756325	0.68957	0.786651	0.781459	0.829205	0.812172	0.985903	0.958763	0.977394	0.772872
32.352	0.77234	0.844879	0.86471	0.756325	0.689346	0.786881	0.781459	0.829205	0.811647	0.985903	0.960236	0.977394	0.772872
32.374	0.77234	0.844287	0.865348	0.756325	0.689346	0.787112	0.781459	0.828553	0.811647	0.985022	0.960236	0.9768	0.772872
32.396	0.77234	0.844287	0.865348	0.756325	0.689123	0.787572	0.781192	0.828553	0.811647	0.985022	0.961708	0.9768	0.772872
32.418	0.77234	0.844287	0.865348	0.756325	0.689123	0.787802	0.781192	0.828553	0.811647	0.985022	0.961708	0.9768	0.773404
32.439	0.77234	0.844287	0.865348	0.756325	0.688899	0.788032	0.781192	0.828553	0.811647	0.984141	0.963181	0.9768	0.773404
32.461	0.77234	0.843694	0.865348	0.756325	0.688899	0.788262	0.781192	0.827901	0.811647	0.984141	0.963181	0.9768	0.773404
32.483	0.77234	0.843694	0.865986	0.756325	0.688899	0.788723	0.780924	0.827901	0.811647	0.984141	0.964654	0.9768	0.773404
32.505	0.77234	0.843694	0.865986	0.756325	0.688675	0.788953	0.780924	0.827901	0.811647	0.98326	0.964654	0.9768	0.773404
32.526	0.77234	0.843102	0.865986	0.756325	0.688675	0.789183	0.780924	0.827901	0.811123	0.98326	0.964654	0.976205	0.773404
32.548	0.772872	0.843102	0.865986	0.756325	0.688675	0.789643	0.780924	0.827249	0.811123	0.98326	0.966127	0.976205	0.773404
32.57	0.772872	0.843102	0.865986	0.756325	0.688451	0.789873	0.780657	0.827249	0.811123	0.982379	0.967599	0.976205	0.773404
32.592	0.772872	0.843102	0.865986	0.756325	0.688451	0.790104	0.780657	0.827249	0.811123	0.982379	0.967599	0.976205	0.773936
32.613	0.772872	0.84251	0.866624	0.756325	0.688451	0.790564	0.780657	0.826597	0.811123	0.981498	0.969072	0.976205	0.773936
32.635	0.772872	0.84251	0.866624	0.756325	0.688451	0.790794	0.780657	0.826597	0.811123	0.981498	0.969072	0.976205	0.773936
32.657	0.772872	0.84251	0.866624	0.756325	0.688227	0.791024	0.780657	0.826597	0.811123	0.981498	0.970545	0.97561	0.773936
32.679	0.772872	0.841918	0.866624	0.756325	0.688227	0.791484	0.78039	0.826597	0.810598	0.980617	0.970545	0.97561	0.773936
32.7	0.772872	0.841918	0.866624	0.756325	0.688227	0.791715	0.78039	0.825945	0.810598	0.980617	0.972018	0.97561	0.773936
32.722	0.772872	0.841918	0.867262	0.756325	0.688227	0.792175	0.78039	0.825945	0.810598	0.979736	0.972018	0.97561	0.773936
32.744	0.773404	0.841326	0.867262	0.756325	0.688004	0.792405	0.78039	0.825945	0.810598	0.979736	0.97349	0.97561	0.774468
32.765	0.773404	0.841326	0.867262	0.756325	0.688004	0.792865	0.78039	0.825293	0.810598	0.979736	0.97349	0.97561	0.774468
32.787	0.773404	0.841326	0.867262	0.756325	0.688004	0.793096	0.78039	0.825293	0.810598	0.978855	0.974963	0.975015	0.774468
32.809	0.773404	0.840734	0.867262	0.756325	0.688004	0.793326	0.780123	0.825293	0.810073	0.978855	0.974963	0.975015	0.774468
32.831	0.773404	0.840734	0.867262	0.756325	0.688004	0.793786	0.780123	0.824641	0.810073	0.977974	0.976436	0.975015	0.774468
32.852	0.773404	0.840734	0.867262	0.756325	0.68778	0.794016	0.780123	0.824641	0.810073	0.977974	0.976436	0.975015	0.774468
32.874	0.773404	0.840142	0.8679	0.756325	0.68778	0.794246	0.780123	0.824641	0.810073	0.977093	0.977909	0.97442	0.774468
32.896	0.773404	0.840142	0.8679	0.756325	0.68778	0.794707	0.780123	0.82399	0.810073	0.977093	0.979381	0.97442	0.774468
32.918	0.773936	0.840142	0.8679	0.756325	0.68778	0.794937	0.780123	0.82399	0.810073	0.977093	0.979381	0.97442	0.775
32.939	0.773936	0.83955	0.8679	0.756325	0.68778	0.795397	0.780123	0.82399	0.809549	0.976211	0.980854	0.97442	0.775
32.961	0.773936	0.83955	0.8679	0.756325	0.68778	0.795627	0.779856	0.823338	0.809549	0.976211	0.980854	0.973825	0.775
32.983	0.773936	0.838958	0.8679	0.756325	0.687556	0.795857	0.779856	0.823338	0.809549	0.97533	0.982327	0.973825	0.775
33.005	0.773936	0.838958	0.8679	0.756325	0.687556	0.796087	0.779856	0.822686	0.809549	0.97533	0.982327	0.973825	0.775
33.026	0.773936	0.838958	0.868539	0.756325	0.687556	0.796548	0.779856	0.822686	0.809549	0.974449	0.9838	0.973825	0.775
33.048	0.773936	0.838366	0.868539	0.756325	0.687556	0.796778	0.779856	0.822686	0.809549	0.974449	0.9838	0.97323	0.775
33.07	0.774468	0.838366	0.868539	0.756325	0.687556	0.797008	0.779856	0.822034	0.809024	0.973568	0.985272	0.97323	0.775
33.092	0.774468	0.838366	0.868539	0.756325	0.687556	0.797238	0.779856	0.822034	0.809024	0.973568	0.985272	0.97323	0.775
33.113	0.774468	0.837774	0.868539	0.756325	0.687556	0.797468	0.779856	0.822034	0.809024	0.972687	0.986745	0.972635	0.775532
33.135	0.774468	0.837774	0.868539	0.756325	0.687556	0.797929	0.779589	0.821382	0.809024	0.972687	0.986745	0.972635	0.775532
33.157	0.774468	0.837182	0.868539	0.756325	0.687556	0.798159	0.779589	0.821382	0.809024	0.971806	0.988218	0.972635	0.775532
33.179	0.774468	0.837182	0.868539	0.756325	0.687556	0.798389	0.779589	0.82073	0.808499	0.971806	0.988218	0.97204	0.775532
33.2	0.774468	0.83659	0.869177	0.756325	0.687332	0.798619	0.779589	0.82073	0.808499	0.970925	0.988218	0.97204	0.775532
33.222	0.774468	0.83659	0.869177	0.756325	0.687332	0.798849	0.779589	0.82073	0.808499	0.970925	0.989691	0.97204	0.775532
33.244	0.775	0.83659	0.869177	0.756325	0.687332	0.799079	0.779589	0.820078	0.808499	0.970044	0.989691	0.971446	0.775532
33.266	0.775	0.835998	0.869177	0.756325	0.687332	0.79931	0.779589	0.820078	0.808499	0.969163	0.991163	0.971446	0.775532
33.287	0.775	0.835998	0.869177	0.756325	0.687332	0.79931	0.779321	0.819426	0.807975	0.969163	0.991163	0.971446	0.775532
33.309	0.775	0.835406	0.869177	0.756325	0.687332	0.79954	0.779321	0.819426	0.807975	0.968282	0.992636	0.970851	0.775532
33.331	0.775	0.835406	0.869177	0.756325	0.687332	0.79977	0.779321	0.818774	0.807975	0.968282	0.992636	0.970851	0.775532
33.353	0.775	0.834813	0.869177	0.756325	0.687332	0.8	0.779321	0.818774	0.807975	0.967401	0.992636	0.970851	0.775532
33.374	0.775	0.834813	0.869177	0.756325	0.687332	0.80023	0.779321	0.818123	0.807975	0.967401	0.994109	0.970256	0.775532
33.396	0.775	0.834221	0.869177	0.756325	0.687332	0.80023	0.779321	0.818123	0.80745	0.96652	0.994109	0.970256	0.775532
33.418	0.775	0.834221	0.869815	0.756325	0.687332	0.80046	0.779054	0.818123	0.80745	0.965639	0.994109	0.969661	0.775532
33.44	0.775532	0.833629	0.869815	0.756325	0.687108	0.80046	0.779054	0.817471	0.80745	0.965639	0.995582	0.969661	0.775532
33.461	0.775532	0.833629	0.869815	0.756325	0.687108	0.80069	0.779054	0.817471	0.80745	0.964758	0.995582	0.969661	0.775532
33.483	0.775532	0.833037	0.869815	0.756325	0.687108	0.80069	0.779054	0.816819	0.806925	0.964758	0.995582	0.969066	0.775532
33.505	0.775532	0.833037	0.869815	0.756325	0.687108	0.800921	0.779054	0.816819	0.806925	0.963877	0.995582	0.969066	0.775532
33.527	0.775532	0.832445	0.869815	0.756325	0.687108	0.800921	0.778787	0.816167	0.806925	0.962996	0.997054	0.968471	0.775532
33.548	0.775532	0.832445	0.869815	0.756325	0.687108	0.801151	0.778787	0.816167	0.806925	0.962996	0.997054	0.968471	0.775532
33.57	0.775532	0.831853	0.869815	0.756325	0.687108	0.801151	0.778787	0.815515	0.806401	0.962115	0.997054	0.967876	0.775532
33.592	0.775532	0.831853	0.869815	0.756325	0.687108	0.801151	0.778787	0.815515	0.806401	0.961233	0.997054	0.967876	0.775532
33.614	0.775532	0.831261	0.869815	0.756325	0.686885	0.801381	0.77852	0.814863	0.806401	0.961233	0.998527	0.967876	0.775532
33.635	0.775532	0.831261	0.869815	0.756325	0.686885	0.801381	0.77852	0.814863	0.806401	0.960352	0.998527	0.967281	0.775532
33.657	0.775532	0.830669	0.869815	0.756325	0.686885	0.801381	0.77852	0.814211	0.806401	0.959471	0.998527	0.967281	0.775532
33.679	0.775532	0.830669	0.869815	0.756325	0.686885	0.801381	0.77852	0.814211	0.805876	0.959471	0.998527	0.966686	0.775532
33.701	0.775532	0.830077	0.869815	0.756325	0.686885	0.801381	0.778253	0.813559	0.805876	0.95859	0.998527	0.966686	0.775532
33.722	0.775532	0.830077	0.869815	0.756325	0.686885	0.801381	0.778253	0.813559	0.805876	0.957709	0.998527	0.966092	0.775532
33.744	0.775532	0.829485	0.870453	0.756024	0.686661	0.801381	0.778253	0.812907	0.805876	0.957709	0.998527	0.966092	0.775532
33.766	0.775532	0.829485	0.870453	0.756024	0.686661	0.801381	0.777986	0.812907	0.805352	0.956828	1	0.965497	0.775532
33.788	0.775532	0.828893	0.870453	0.756024	0.686661	0.801381	0.777986	0.812256	0.805352	0.955947	1	0.965497	0.775532
33.809	0.775532	0.828893	0.870453	0.756024	0.686661	0.801381	0.777986	0.812256	0.805352	0.955066	1	0.964902	0.775
33.831	0.775532	0.828301	0.870453	0.756024	0.686661	0.801381	0.777986	0.811604	0.804827	0.955066	1	0.964902	0.775
33.853	0.775532	0.828301	0.870453	0.756024	0.686437	0.801381	0.777718	0.811604	0.804827	0.954185	1	0.964307	0.775
33.875	0.775532	0.827709	0.870453	0.756024	0.686437	0.801381	0.777718	0.810952	0.804827	0.953304	1	0.964307	0.775
33.896	0.775532	0.827117	0.870453	0.756024	0.686437	0.801381	0.777718	0.8103	0.804827	0.953304	1	0.963712	0.775
33.918	0.775532	0.827117	0.870453	0.755723	0.686437	0.801381	0.777451	0.8103	0.804302	0.952423	1	0.963712	0.775
33.94	0.775532	0.826525	0.870453	0.755723	0.686213	0.801151	0.777451	0.809648	0.804302	0.951542	1	0.963117	0.775
33.962	0.775532	0.826525	0.870453	0.755723	0.686213	0.801151	0.777451	0.809648	0.804302	0.950661	0.998527	0.963117	0.775
33.983	0.775532	0.825933	0.870453	0.755723	0.686213	0.801151	0.777184	0.808996	0.804302	0.950661	0.998527	0.962522	0.775
34.005	0.775532	0.825933	0.870453	0.755723	0.685989	0.801151	0.777184	0.808996	0.803778	0.94978	0.998527	0.962522	0.774468
34.027	0.775532	0.82534	0.870453	0.755723	0.685989	0.800921	0.776917	0.808344	0.803778	0.948899	0.998527	0.961927	0.774468
34.049	0.775532	0.82534	0.870453	0.755422	0.685989	0.800921	0.776917	0.807692	0.803778	0.948018	0.998527	0.961927	0.774468
34.07	0.775532	0.824748	0.870453	0.755422	0.685989	0.800921	0.776917	0.807692	0.803253	0.947137	0.998527	0.961333	0.774468
34.092	0.775532	0.824156	0.870453	0.755422	0.685765	0.800921	0.77665	0.80704	0.803253	0.947137	0.997054	0.961333	0.774468
34.114	0.775532	0.824156	0.870453	0.755422	0.685765	0.80069	0.77665	0.80704	0.803253	0.946256	0.997054	0.960738	0.774468
34.136	0.775	0.823564	0.870453	0.755422	0.685542	0.80069	0.77665	0.806389	0.803253	0.945374	0.997054	0.960738	0.774468
34.157	0.775	0.823564	0.870453	0.75512	0.685542	0.80069	0.776383	0.806389	0.802728	0.944493	0.997054	0.960143	0.773936
34.179	0.775	0.822972	0.870453	0.75512	0.685542	0.80069	0.776383	0.805737	0.802728	0.943612	0.995582	0.959548	0.773936
34.201	0.775	0.822972	0.870453	0.75512	0.685318	0.80046	0.776383	0.805085	0.802728	0.943612	0.995582	0.959548	0.773936
34.223	0.775	0.82238	0.870453	0.75512	0.685318	0.80046	0.776115	0.805085	0.802204	0.942731	0.995582	0.958953	0.773936
34.244	0.775	0.821788	0.870453	0.75512	0.685094	0.80046	0.776115	0.804433	0.802204	0.94185	0.994109	0.958953	0.773936
34.266	0.775	0.821788	0.870453	0.754819	0.685094	0.80046	0.775848	0.804433	0.802204	0.940969	0.994109	0.958358	0.773936
34.288	0.775	0.821196	0.869815	0.754819	0.685094	0.80023	0.775848	0.803781	0.801679	0.940088	0.994109	0.958358	0.773404
34.31	0.775	0.821196	0.869815	0.754819	0.68487	0.80023	0.775848	0.803129	0.801679	0.939207	0.992636	0.957763	0.773404
34.331	0.774468	0.820604	0.869815	0.754819	0.68487	0.80023	0.775581	0.803129	0.801679	0.938326	0.992636	0.957168	0.773404
34.353	0.774468	0.820012	0.869815	0.754518	0.684646	0.80023	0.775581	0.802477	0.801154	0.938326	0.992636	0.957168	0.773404
34.375	0.774468	0.820012	0.869815	0.754518	0.684646	0.80023	0.775581	0.801825	0.801154	0.937445	0.991163	0.956573	0.773404
34.397	0.774468	0.81942	0.869815	0.754518	0.684423	0.80023	0.775314	0.801825	0.801154	0.936564	0.991163	0.956573	0.772872
34.418	0.774468	0.81942	0.869815	0.754518	0.684423	0.80023	0.775314	0.801173	0.80063	0.935683	0.989691	0.955979	0.772872
34.44	0.774468	0.818828	0.869815	0.754217	0.684199	0.8	0.775047	0.801173	0.80063	0.934802	0.989691	0.955384	0.772872
34.462	0.774468	0.818236	0.869815	0.754217	0.683975	0.8	0.775047	0.800522	0.80063	0.933921	0.988218	0.955384	0.772872
34.484	0.773936	0.818236	0.869815	0.754217	0.683975	0.8	0.775047	0.79987	0.800105	0.93304	0.988218	0.954789	0.772872
34.505	0.773936	0.817644	0.869815	0.754217	0.683751	0.80023	0.77478	0.79987	0.800105	0.932159	0.986745	0.954789	0.77234
34.527	0.773936	0.817644	0.869177	0.753916	0.683751	0.80023	0.77478	0.799218	0.800105	0.931278	0.986745	0.954194	0.77234
34.549	0.773936	0.817052	0.869177	0.753916	0.683527	0.80023	0.77478	0.798566	0.79958	0.931278	0.985272	0.953599	0.77234
34.57	0.773936	0.817052	0.869177	0.753916	0.683303	0.80023	0.774512	0.798566	0.79958	0.930396	0.985272	0.953599	0.77234
34.592	0.773936	0.816459	0.869177	0.753916	0.683303	0.80023	0.774512	0.797914	0.79958	0.929515	0.9838	0.953004	0.77234
34.614	0.773404	0.815867	0.869177	0.753614	0.68308	0.80023	0.774512	0.797262	0.799056	0.928634	0.982327	0.952409	0.771809
34.636	0.773404	0.815867	0.869177	0.753614	0.682856	0.80046	0.774245	0.797262	0.799056	0.927753	0.982327	0.952409	0.771809
34.657	0.773404	0.815275	0.869177	0.753614	0.682632	0.80046	0.774245	0.79661	0.799056	0.926872	0.980854	0.951814	0.771809
34.679	0.773404	0.815275	0.868539	0.753313	0.682632	0.80046	0.774245	0.795958	0.798531	0.925991	0.980854	0.951814	0.771809
34.701	0.773404	0.814683	0.868539	0.753313	0.682408	0.80069	0.773978	0.795958	0.798531	0.92511	0.979381	0.95122	0.771277
34.723	0.772872	0.814091	0.868539	0.753313	0.682184	0.80069	0.773978	0.795306	0.798006	0.924229	0.977909	0.950625	0.771277
34.744	0.772872	0.814091	0.868539	0.753313	0.681961	0.80069	0.773978	0.794654	0.798006	0.923348	0.977909	0.950625	0.771277
34.766	0.772872	0.813499	0.868539	0.753012	0.681737	0.800921	0.773711	0.794654	0.798006	0.922467	0.976436	0.95003	0.771277
34.788	0.772872	0.813499	0.8679	0.753012	0.681737	0.801151	0.773711	0.794003	0.797482	0.921586	0.976436	0.949435	0.770745
34.81	0.772872	0.812907	0.8679	0.753012	0.681513	0.801151	0.773711	0.793351	0.797482	0.920705	0.974963	0.949435	0.770745
34.831	0.77234	0.812315	0.8679	0.752711	0.681289	0.801381	0.773444	0.792699	0.796957	0.919824	0.97349	0.94884	0.770745
34.853	0.77234	0.812315	0.8679	0.752711	0.681065	0.801381	0.773444	0.792699	0.796957	0.918943	0.97349	0.948245	0.770745
34.875	0.77234	0.811723	0.8679	0.752711	0.680842	0.801611	0.773444	0.792047	0.796432	0.918062	0.972018	0.948245	0.770213
34.897	0.77234	0.811723	0.867262	0.75241	0.680618	0.801841	0.773444	0.791395	0.796432	0.917181	0.970545	0.94765	0.770213
34.918	0.77234	0.811131	0.867262	0.75241	0.680394	0.802071	0.773177	0.791395	0.796432	0.9163	0.970545	0.947055	0.770213
34.94	0.771809	0.810539	0.867262	0.75241	0.68017	0.802301	0.773177	0.790743	0.795908	0.915419	0.969072	0.947055	0.770213
34.962	0.771809	0.810539	0.867262	0.752108	0.679946	0.802532	0.773177	0.790091	0.795908	0.914537	0.967599	0.94646	0.769681
34.984	0.771809	0.809947	0.866624	0.752108	0.679499	0.802532	0.772909	0.789439	0.795383	0.913656	0.967599	0.945866	0.769681
35.005	0.771809	0.809947	0.866624	0.752108	0.679275	0.802762	0.772909	0.789439	0.795383	0.912775	0.966127	0.945866	0.769681
35.027	0.771277	0.809355	0.866624	0.751807	0.679051	0.802992	0.772909	0.788787	0.794858	0.911894	0.966127	0.945271	0.769149
35.049	0.771277	0.809355	0.866624	0.751807	0.678827	0.803222	0.772642	0.788136	0.794858	0.911013	0.964654	0.944676	0.769149
35.071	0.771277	0.808763	0.865986	0.751807	0.678603	0.803682	0.772642	0.788136	0.794334	0.910132	0.963181	0.944081	0.769149
35.092	0.771277	0.808171	0.865986	0.751506	0.67838	0.803913	0.772642	0.787484	0.794334	0.909251	0.963181	0.944081	0.768617
35.114	0.770745	0.808171	0.865986	0.751506	0.677932	0.804143	0.772642	0.786832	0.793809	0.90837	0.961708	0.943486	0.768617
35.136	0.770745	0.807578	0.865348	0.751506	0.677708	0.804373	0.772375	0.78618	0.793809	0.906608	0.960236	0.942891	0.768617
35.158	0.770745	0.807578	0.865348	0.751205	0.677484	0.804603	0.772375	0.78618	0.793284	0.905727	0.960236	0.942891	0.768085
35.179	0.770745	0.806986	0.865348	0.751205	0.677037	0.804833	0.772375	0.785528	0.793284	0.904846	0.958763	0.942296	0.768085
35.201	0.770213	0.806986	0.86471	0.751205	0.676813	0.805293	0.772108	0.784876	0.79276	0.903965	0.958763	0.941701	0.768085
35.223	0.770213	0.806394	0.86471	0.750904	0.676365	0.805524	0.772108	0.784224	0.79276	0.903084	0.95729	0.941106	0.767553
35.245	0.770213	0.805802	0.86471	0.750904	0.676141	0.805754	0.771841	0.783572	0.792235	0.902203	0.95729	0.941106	0.767553
35.266	0.770213	0.805802	0.864071	0.750602	0.675918	0.805984	0.771841	0.783572	0.792235	0.901322	0.955817	0.940512	0.767553
35.288	0.769681	0.80521	0.864071	0.750602	0.67547	0.806444	0.771841	0.78292	0.79171	0.900441	0.954345	0.939917	0.767021
35.31	0.769681	0.80521	0.864071	0.750301	0.675246	0.806674	0.771574	0.782269	0.79171	0.899559	0.954345	0.939322	0.767021
35.332	0.769681	0.804618	0.863433	0.750301	0.674799	0.807135	0.771574	0.781617	0.791186	0.898678	0.952872	0.938727	0.767021
35.353	0.769149	0.804618	0.863433	0.750301	0.674351	0.807365	0.771574	0.781617	0.791186	0.896916	0.952872	0.938727	0.766489
35.375	0.769149	0.804026	0.862795	0.75	0.674127	0.807595	0.771306	0.780965	0.790661	0.896035	0.951399	0.938132	0.766489
35.397	0.769149	0.804026	0.862795	0.75	0.673679	0.808055	0.771306	0.780313	0.790136	0.895154	0.951399	0.937537	0.765957
35.419	0.768617	0.803434	0.862795	0.749699	0.673456	0.808285	0.771039	0.779661	0.790136	0.894273	0.949926	0.936942	0.765957
35.44	0.768617	0.802842	0.862157	0.749699	0.673008	0.808746	0.771039	0.779009	0.789612	0.893392	0.949926	0.936347	0.765426
35.462	0.768617	0.802842	0.862157	0.749398	0.67256	0.808976	0.771039	0.779009	0.789612	0.892511	0.948454	0.936347	0.765426
35.484	0.768085	0.80225	0.862157	0.749398	0.672337	0.809206	0.770772	0.778357	0.789087	0.890749	0.948454	0.935753	0.765426
35.506	0.768085	0.80225	0.861519	0.749096	0.671889	0.809666	0.770772	0.777705	0.788562	0.889868	0.946981	0.935158	0.764894
35.527	0.768085	0.801658	0.861519	0.748795	0.671441	0.809896	0.770505	0.777053	0.788562	0.888987	0.946981	0.934563	0.764894
35.549	0.767553	0.801658	0.860881	0.748795	0.670994	0.810357	0.770505	0.776402	0.788038	0.888106	0.945508	0.933968	0.764362
35.571	0.767553	0.801066	0.860881	0.748494	0.67077	0.810587	0.770238	0.77575	0.787513	0.887225	0.945508	0.933373	0.764362
35.593	0.767553	0.801066	0.860243	0.748494	0.670322	0.810817	0.770238	0.77575	0.787513	0.885463	0.944035	0.932778	0.76383
35.614	0.767021	0.800474	0.860243	0.748193	0.669875	0.811277	0.769971	0.775098	0.786988	0.884581	0.944035	0.932778	0.76383
35.636	0.767021	0.799882	0.860243	0.747892	0.669427	0.811507	0.769971	0.774446	0.786464	0.8837	0.942563	0.932183	0.763298
35.658	0.767021	0.799882	0.859604	0.747892	0.668979	0.811968	0.769703	0.773794	0.786464	0.882819	0.942563	0.931588	0.763298
35.68	0.766489	0.79929	0.859604	0.74759	0.668532	0.812198	0.769436	0.773142	0.785939	0.881938	0.94109	0.930993	0.762766
35.701	0.766489	0.79929	0.858966	0.747289	0.668308	0.812428	0.769436	0.77249	0.785414	0.880176	0.94109	0.930399	0.762766
35.723	0.765957	0.798697	0.858966	0.747289	0.66786	0.812888	0.769169	0.77249	0.785414	0.879295	0.939617	0.929804	0.762234
35.745	0.765957	0.798105	0.858328	0.746988	0.667413	0.813119	0.769169	0.771838	0.78489	0.878414	0.939617	0.929209	0.762234
35.767	0.765426	0.798105	0.858328	0.746687	0.666965	0.813349	0.768902	0.771186	0.784365	0.877533	0.939617	0.928614	0.761702
35.788	0.765426	0.797513	0.85769	0.746687	0.666517	0.813579	0.768635	0.770535	0.783841	0.875771	0.938144	0.928019	0.76117
35.81	0.765426	0.797513	0.85769	0.746386	0.66607	0.814039	0.768635	0.769883	0.783841	0.87489	0.938144	0.927424	0.76117
35.832	0.764894	0.796921	0.857052	0.746084	0.665622	0.814269	0.768368	0.769231	0.783316	0.874009	0.936672	0.926829	0.760638
35.854	0.764894	0.796921	0.857052	0.745783	0.665175	0.814499	0.7681	0.768579	0.782791	0.873128	0.936672	0.926234	0.760638
35.875	0.764362	0.796329	0.856414	0.745482	0.664727	0.81473	0.7681	0.767927	0.782267	0.871366	0.936672	0.92564	0.760106
35.897	0.764362	0.795737	0.856414	0.745482	0.664279	0.81496	0.767833	0.767275	0.782267	0.870485	0.935199	0.925045	0.759574
35.919	0.76383	0.795737	0.855775	0.745181	0.663832	0.81519	0.767566	0.767275	0.781742	0.869604	0.935199	0.92445	0.759574
35.941	0.76383	0.795145	0.855775	0.74488	0.663384	0.81542	0.767566	0.766623	0.781217	0.867841	0.935199	0.923855	0.759043
35.962	0.763298	0.795145	0.855137	0.744578	0.662936	0.81565	0.767299	0.765971	0.780693	0.86696	0.933726	0.92326	0.758511
35.984	0.763298	0.794553	0.855137	0.744277	0.662489	0.81588	0.767032	0.765319	0.780168	0.866079	0.933726	0.922665	0.758511
36.006	0.762766	0.793961	0.854499	0.743976	0.662041	0.81611	0.766765	0.764668	0.780168	0.864317	0.933726	0.92207	0.757979
36.028	0.762766	0.793961	0.854499	0.743675	0.661594	0.816341	0.766497	0.764016	0.779643	0.863436	0.932253	0.921475	0.757447
36.049	0.762234	0.793369	0.853861	0.743373	0.661146	0.816571	0.766497	0.763364	0.779119	0.862555	0.932253	0.92088	0.757447
36.071	0.762234	0.792777	0.853223	0.743072	0.660698	0.816571	0.76623	0.762712	0.778594	0.860793	0.932253	0.920286	0.756915
36.093	0.761702	0.792777	0.853223	0.742771	0.660251	0.816801	0.765963	0.76206	0.778069	0.859912	0.930781	0.919096	0.756383
36.115	0.76117	0.792185	0.852585	0.74247	0.659803	0.817031	0.765696	0.761408	0.778069	0.859031	0.930781	0.918501	0.755851
36.136	0.76117	0.791593	0.852585	0.742169	0.659355	0.817031	0.765429	0.760756	0.777545	0.857269	0.930781	0.917906	0.755851
36.158	0.760638	0.791593	0.851946	0.741867	0.658908	0.817261	0.765162	0.760104	0.77702	0.856388	0.929308	0.917311	0.755319
36.18	0.760638	0.791001	0.851946	0.741566	0.65846	0.817261	0.764894	0.759452	0.776495	0.855507	0.929308	0.916716	0.754787
36.202	0.760106	0.790409	0.851308	0.741265	0.658013	0.817491	0.764894	0.758801	0.775971	0.853744	0.929308	0.916121	0.754255
36.223	0.759574	0.790409	0.85067	0.740964	0.657565	0.817491	0.764627	0.758801	0.775446	0.852863	0.927835	0.915526	0.753723
36.245	0.759574	0.789816	0.85067	0.740663	0.657117	0.817722	0.76436	0.758149	0.774921	0.851982	0.927835	0.914337	0.753723
36.267	0.759043	0.789224	0.850032	0.740361	0.65667	0.817722	0.764093	0.757497	0.774921	0.85022	0.927835	0.913742	0.753191
36.289	0.758511	0.789224	0.849394	0.74006	0.656222	0.817722	0.763826	0.756845	0.774397	0.849339	0.927835	0.913147	0.75266
36.31	0.758511	0.788632	0.849394	0.739759	0.655774	0.817952	0.763559	0.756193	0.773872	0.847577	0.926362	0.912552	0.752128
36.332	0.757979	0.78804	0.848756	0.739458	0.655327	0.817952	0.763291	0.755541	0.773347	0.846696	0.926362	0.911362	0.751596
36.354	0.757447	0.787448	0.848756	0.739157	0.654879	0.817952	0.763024	0.754889	0.772823	0.844934	0.926362	0.910767	0.751064
36.375	0.757447	0.787448	0.848117	0.738554	0.654208	0.817952	0.762757	0.754237	0.772298	0.844053	0.926362	0.910173	0.751064
36.397	0.756915	0.786856	0.847479	0.738253	0.65376	0.817952	0.76249	0.753585	0.771773	0.843172	0.92489	0.909578	0.750532
36.419	0.756383	0.786264	0.847479	0.737952	0.653312	0.817952	0.762223	0.752934	0.771249	0.84141	0.92489	0.908388	0.75
36.441	0.755851	0.786264	0.846841	0.737651	0.652865	0.818182	0.761688	0.752282	0.770724	0.840529	0.92489	0.907793	0.749468
36.462	0.755851	0.785672	0.846203	0.737349	0.652417	0.818182	0.761421	0.75163	0.770199	0.838767	0.92489	0.907198	0.748936
36.484	0.755319	0.78508	0.845565	0.736747	0.65197	0.817952	0.761154	0.750978	0.769675	0.837885	0.923417	0.906008	0.748404
36.506	0.754787	0.784488	0.845565	0.736446	0.651522	0.817952	0.760887	0.749674	0.76915	0.836123	0.923417	0.905413	0.747872
36.528	0.754255	0.783896	0.844927	0.736145	0.651074	0.817952	0.76062	0.749022	0.768625	0.835242	0.923417	0.904819	0.74734
36.549	0.753723	0.783896	0.844288	0.735843	0.650627	0.817952	0.760353	0.74837	0.768101	0.83348	0.923417	0.903629	0.746809
36.571	0.753723	0.783304	0.844288	0.735241	0.650179	0.817952	0.760085	0.747718	0.767576	0.832599	0.921944	0.903034	0.746277
36.593	0.753191	0.782712	0.84365	0.73494	0.649731	0.817952	0.759551	0.747066	0.767051	0.831718	0.921944	0.902439	0.745745
36.615	0.75266	0.78212	0.843012	0.734639	0.649284	0.817952	0.759284	0.746415	0.766527	0.829956	0.921944	0.901249	0.745213
36.636	0.752128	0.781528	0.842374	0.734337	0.648836	0.817722	0.759017	0.745763	0.766002	0.829075	0.921944	0.900654	0.744681
36.658	0.751596	0.781528	0.842374	0.733735	0.648389	0.817722	0.75875	0.745111	0.765477	0.827313	0.920471	0.899465	0.744149
36.68	0.751064	0.780935	0.841736	0.733434	0.647941	0.817722	0.758483	0.744459	0.764953	0.826432	0.920471	0.89887	0.743617
36.702	0.751064	0.780343	0.841098	0.733133	0.647493	0.817722	0.757948	0.743807	0.764428	0.82467	0.920471	0.898275	0.743085
36.723	0.750532	0.779751	0.840459	0.73253	0.647046	0.817491	0.757681	0.743155	0.763903	0.823789	0.920471	0.897085	0.742553
36.745	0.75	0.779159	0.839821	0.732229	0.646374	0.817491	0.757414	0.742503	0.763379	0.822026	0.920471	0.89649	0.742021
36.767	0.749468	0.778567	0.839821	0.731928	0.645927	0.817491	0.757147	0.741851	0.762854	0.820264	0.918999	0.8953	0.741489
36.789	0.748936	0.777975	0.839183	0.731325	0.645479	0.817261	0.756612	0.740548	0.762329	0.819383	0.918999	0.894706	0.740957
36.81	0.748404	0.777383	0.838545	0.731024	0.645031	0.817261	0.756345	0.739896	0.761805	0.817621	0.918999	0.893516	0.740426
36.832	0.747872	0.777383	0.837907	0.730422	0.644584	0.817261	0.756078	0.739244	0.76128	0.81674	0.918999	0.892921	0.739894
36.854	0.74734	0.776791	0.837269	0.73012	0.644136	0.817031	0.755544	0.738592	0.760756	0.814978	0.917526	0.891731	0.73883
36.876	0.746809	0.776199	0.836631	0.729819	0.643688	0.817031	0.755277	0.73794	0.760231	0.814097	0.917526	0.891136	0.738298
36.897	0.746277	0.775607	0.835992	0.729217	0.643241	0.816801	0.755009	0.737288	0.759706	0.812335	0.917526	0.889946	0.737766
36.919	0.745745	0.775015	0.835992	0.728916	0.642793	0.816801	0.754475	0.736636	0.758657	0.811454	0.917526	0.889352	0.737234
36.941	0.745213	0.774423	0.835354	0.728313	0.642346	0.816571	0.754208	0.735984	0.758132	0.809692	0.917526	0.888162	0.736702
36.963	0.744681	0.773831	0.834716	0.728012	0.641898	0.816571	0.753674	0.734681	0.757608	0.808811	0.916053	0.887567	0.73617
36.984	0.744149	0.773239	0.834078	0.727711	0.64145	0.816341	0.753406	0.734029	0.757083	0.807048	0.916053	0.886377	0.735638
37.006	0.743617	0.772647	0.83344	0.727108	0.641003	0.816341	0.752872	0.733377	0.756558	0.805286	0.916053	0.885782	0.734574
37.028	0.743085	0.772054	0.832802	0.726807	0.640555	0.816341	0.752605	0.732725	0.756034	0.804405	0.916053	0.884593	0.734043
37.05	0.742553	0.771462	0.832163	0.726205	0.640107	0.81611	0.752338	0.732073	0.755509	0.802643	0.916053	0.883998	0.733511
37.071	0.742021	0.77087	0.831525	0.725904	0.63966	0.81611	0.751803	0.730769	0.75446	0.801762	0.91458	0.882808	0.732979
37.093	0.741489	0.770278	0.830887	0.725301	0.639212	0.81588	0.751536	0.730117	0.753935	0.8	0.91458	0.882213	0.732447
37.115	0.740957	0.769686	0.830249	0.725	0.638765	0.81588	0.751002	0.729465	0.75341	0.798238	0.91458	0.881023	0.731383
37.137	0.740426	0.769094	0.829611	0.724398	0.638317	0.81565	0.750468	0.728814	0.752886	0.797357	0.91458	0.879833	0.730851
37.158	0.739894	0.768502	0.828973	0.724096	0.637869	0.81542	0.7502	0.728162	0.752361	0.795595	0.91458	0.879239	0.730319
37.18	0.73883	0.76791	0.828334	0.723494	0.637422	0.81542	0.749666	0.726858	0.751836	0.793833	0.91458	0.878049	0.729787
37.202	0.738298	0.767318	0.827696	0.723193	0.636974	0.81519	0.749399	0.726206	0.750787	0.792952	0.913108	0.877454	0.729255
37.224	0.737766	0.766726	0.827058	0.72259	0.636303	0.81519	0.748865	0.725554	0.750262	0.791189	0.913108	0.876264	0.728191
37.245	0.737234	0.766134	0.82642	0.722289	0.635855	0.81496	0.748597	0.724902	0.749738	0.790308	0.913108	0.875074	0.72766
37.267	0.736702	0.765542	0.825782	0.721687	0.635407	0.81496	0.748063	0.723598	0.749213	0.788546	0.913108	0.874479	0.727128
37.289	0.73617	0.76495	0.825144	0.721386	0.63496	0.81473	0.747529	0.722947	0.748164	0.786784	0.913108	0.87329	0.726064
37.311	0.735638	0.763766	0.824505	0.720783	0.634512	0.81473	0.747262	0.722295	0.747639	0.785903	0.913108	0.872695	0.725532
37.332	0.734574	0.763173	0.823867	0.720482	0.634064	0.814499	0.746727	0.721643	0.747114	0.784141	0.911635	0.871505	0.725
37.354	0.734043	0.762581	0.823229	0.71988	0.633617	0.814499	0.746193	0.720339	0.74659	0.782379	0.911635	0.870315	0.724468
37.376	0.733511	0.761989	0.822591	0.719578	0.633169	0.814269	0.745926	0.719687	0.74554	0.781498	0.911635	0.86972	0.723404
37.398	0.732979	0.761397	0.821315	0.718976	0.632722	0.814269	0.745391	0.719035	0.745016	0.779736	0.911635	0.868531	0.722872
37.419	0.732447	0.760805	0.820676	0.718675	0.632274	0.814039	0.744857	0.717731	0.744491	0.777974	0.911635	0.867341	0.72234
37.441	0.731383	0.760213	0.820038	0.718072	0.631826	0.814039	0.744323	0.71708	0.743966	0.776211	0.911635	0.866746	0.721277
37.463	0.730851	0.759621	0.8194	0.71747	0.631379	0.813809	0.744056	0.716428	0.742917	0.77533	0.910162	0.865556	0.720745
37.485	0.730319	0.758437	0.818762	0.717169	0.630931	0.813809	0.743521	0.715776	0.742392	0.773568	0.910162	0.864366	0.720213
37.506	0.729787	0.757845	0.818124	0.716566	0.630483	0.813579	0.742987	0.714472	0.741868	0.771806	0.910162	0.863772	0.719149
37.528	0.729255	0.757253	0.816847	0.716265	0.629812	0.813579	0.742453	0.71382	0.740818	0.770925	0.910162	0.862582	0.718617
37.55	0.728191	0.756661	0.816209	0.715663	0.629364	0.813349	0.741918	0.713168	0.740294	0.769163	0.910162	0.861392	0.718085
37.572	0.72766	0.756069	0.815571	0.71506	0.628917	0.813119	0.741384	0.711864	0.739769	0.767401	0.910162	0.860797	0.717021
37.593	0.727128	0.755477	0.814933	0.714759	0.628469	0.813119	0.741117	0.711213	0.73872	0.765639	0.910162	0.859607	0.716489
37.615	0.726064	0.754292	0.814295	0.714157	0.628021	0.812888	0.740582	0.709909	0.738195	0.764758	0.908689	0.858418	0.715957
37.637	0.725532	0.7537	0.813019	0.713855	0.627574	0.812888	0.740048	0.709257	0.737671	0.762996	0.908689	0.857823	0.714894
37.659	0.725	0.753108	0.81238	0.713253	0.627126	0.812658	0.739514	0.708605	0.736621	0.761233	0.908689	0.856633	0.714362
37.68	0.724468	0.752516	0.811742	0.712651	0.626455	0.812658	0.738979	0.707301	0.736097	0.759471	0.908689	0.855443	0.713298
37.702	0.723404	0.751924	0.811104	0.712349	0.626007	0.812428	0.738445	0.706649	0.735572	0.75859	0.908689	0.854848	0.712766
37.724	0.722872	0.75074	0.809828	0.711747	0.62556	0.812428	0.737911	0.705997	0.734523	0.756828	0.908689	0.853659	0.712234
37.746	0.72234	0.750148	0.80919	0.711145	0.625112	0.812198	0.737376	0.704694	0.733998	0.755066	0.908689	0.852469	0.71117
37.767	0.721277	0.749556	0.808551	0.710843	0.624664	0.812198	0.736842	0.704042	0.732949	0.753304	0.907216	0.851874	0.710638
37.789	0.720745	0.748964	0.807275	0.710241	0.623993	0.811968	0.736308	0.702738	0.732424	0.752423	0.907216	0.850684	0.709574
37.811	0.720213	0.74778	0.806637	0.709639	0.623545	0.811968	0.735773	0.702086	0.731899	0.750661	0.907216	0.849494	0.709043
37.833	0.719149	0.747188	0.805999	0.709036	0.623098	0.811738	0.735239	0.700782	0.73085	0.748899	0.907216	0.848305	0.707979
37.854	0.718617	0.746596	0.804722	0.708735	0.62265	0.811738	0.734705	0.70013	0.730325	0.747137	0.907216	0.84771	0.707447
37.876	0.718085	0.746004	0.804084	0.708133	0.621979	0.811507	0.73417	0.698827	0.729276	0.745374	0.907216	0.84652	0.706383
37.898	0.717021	0.744819	0.803446	0.70753	0.621531	0.811277	0.733636	0.698175	0.728751	0.744493	0.907216	0.84533	0.705851
37.92	0.716489	0.744227	0.80217	0.707229	0.621083	0.811277	0.732835	0.697523	0.728227	0.742731	0.905744	0.844735	0.704787
37.941	0.715957	0.743635	0.801532	0.706627	0.620636	0.811047	0.7323	0.696219	0.727177	0.740969	0.905744	0.843546	0.704255
37.963	0.714894	0.743043	0.800255	0.706024	0.619964	0.811047	0.731766	0.695567	0.726653	0.739207	0.905744	0.842356	0.703191
37.985	0.714362	0.741859	0.799617	0.705422	0.619517	0.810817	0.731232	0.694263	0.725603	0.737445	0.905744	0.841166	0.70266
38.007	0.713298	0.741267	0.798979	0.704819	0.619069	0.810817	0.730697	0.693611	0.725079	0.735683	0.905744	0.840571	0.701596
38.028	0.712766	0.740675	0.797703	0.704518	0.618397	0.810587	0.729896	0.692308	0.724029	0.734802	0.905744	0.839381	0.701064
38.05	0.712234	0.739491	0.797064	0.703916	0.61795	0.810357	0.729361	0.691656	0.723505	0.73304	0.905744	0.838192	0.7
38.072	0.71117	0.738899	0.795788	0.703313	0.617502	0.810357	0.728827	0.690352	0.722455	0.731278	0.904271	0.837002	0.699468
38.094	0.710638	0.738307	0.79515	0.702711	0.616831	0.810127	0.728026	0.689048	0.721931	0.729515	0.904271	0.836407	0.698404
38.115	0.709574	0.737123	0.793874	0.702108	0.616383	0.809896	0.727491	0.688396	0.721406	0.727753	0.904271	0.835217	0.697872
38.137	0.709043	0.73653	0.793235	0.701506	0.615712	0.809896	0.726957	0.687093	0.720357	0.725991	0.904271	0.834027	0.696809
38.159	0.707979	0.735938	0.791959	0.700904	0.615264	0.809666	0.726155	0.686441	0.719832	0.724229	0.904271	0.832838	0.696277
38.181	0.707447	0.734754	0.791321	0.700602	0.614816	0.809436	0.725621	0.685137	0.718783	0.722467	0.904271	0.832243	0.695213
38.202	0.706383	0.734162	0.790045	0.7	0.614145	0.809436	0.72482	0.684485	0.718258	0.721586	0.902798	0.831053	0.694681
38.224	0.705851	0.73357	0.789407	0.699398	0.613697	0.809206	0.724285	0.683181	0.717209	0.719824	0.902798	0.829863	0.693617
38.246	0.704787	0.732386	0.78813	0.698795	0.613026	0.808976	0.723484	0.681877	0.716684	0.718062	0.902798	0.828673	0.692553
38.267	0.704255	0.731794	0.787492	0.698193	0.612578	0.808976	0.72295	0.681226	0.715635	0.7163	0.902798	0.828079	0.692021
38.289	0.703191	0.73061	0.786216	0.69759	0.611907	0.808746	0.722148	0.679922	0.71511	0.714537	0.902798	0.826889	0.690957
38.311	0.70266	0.730018	0.785578	0.696988	0.611459	0.808516	0.721614	0.678618	0.714061	0.712775	0.901325	0.825699	0.690426
38.333	0.701596	0.729426	0.784301	0.696386	0.610788	0.808285	0.720812	0.677966	0.713536	0.711013	0.901325	0.824509	0.689362
38.354	0.701064	0.728242	0.783025	0.695783	0.610116	0.808055	0.720011	0.676662	0.712487	0.709251	0.901325	0.823319	0.688298
38.376	0.7	0.727649	0.782387	0.695181	0.609669	0.808055	0.719476	0.675359	0.711962	0.707489	0.901325	0.822725	0.687766
38.398	0.699468	0.726465	0.78111	0.694578	0.608997	0.807825	0.718675	0.674707	0.710913	0.705727	0.899853	0.821535	0.686702
38.42	0.698404	0.725873	0.780472	0.693976	0.60855	0.807595	0.717873	0.673403	0.710388	0.703965	0.899853	0.820345	0.685638
38.441	0.697872	0.725281	0.779196	0.693373	0.607878	0.807365	0.717339	0.672099	0.709339	0.702203	0.899853	0.819155	0.685106
38.463	0.696809	0.724097	0.77792	0.692771	0.607207	0.807135	0.716538	0.671447	0.708814	0.700441	0.899853	0.81856	0.684043
38.485	0.696277	0.723505	0.777281	0.692169	0.606759	0.806904	0.715736	0.670143	0.707765	0.698678	0.89838	0.817371	0.682979
38.507	0.695213	0.722321	0.776005	0.691566	0.606088	0.806674	0.714935	0.66884	0.70724	0.696916	0.89838	0.816181	0.682447
38.528	0.694681	0.721729	0.774729	0.690964	0.605416	0.806444	0.714133	0.667536	0.706191	0.695154	0.89838	0.814991	0.681383
38.55	0.693617	0.720545	0.774091	0.69006	0.604745	0.806214	0.713332	0.666884	0.705142	0.693392	0.896907	0.813801	0.680319
38.572	0.692553	0.719953	0.772814	0.689458	0.604297	0.805984	0.712797	0.66558	0.704617	0.69163	0.896907	0.813206	0.679787
38.594	0.692021	0.718769	0.771538	0.688855	0.603626	0.805754	0.711996	0.664276	0.703568	0.689868	0.896907	0.812017	0.678723
38.615	0.690957	0.718176	0.7709	0.688253	0.602954	0.805524	0.711194	0.662973	0.703043	0.688106	0.895434	0.810827	0.67766
38.637	0.690426	0.717584	0.769623	0.687651	0.602283	0.805293	0.710393	0.662321	0.701994	0.686344	0.895434	0.809637	0.676596
38.659	0.689362	0.7164	0.768347	0.687048	0.601611	0.805063	0.709591	0.661017	0.701469	0.684581	0.893962	0.808447	0.676064
38.681	0.688298	0.715808	0.767709	0.686446	0.60094	0.804833	0.70879	0.659713	0.70042	0.682819	0.893962	0.807258	0.675
38.702	0.687766	0.714624	0.766433	0.685542	0.600269	0.804603	0.707988	0.658409	0.699895	0.681057	0.893962	0.806663	0.673936
38.724	0.686702	0.714032	0.765156	0.68494	0.599597	0.804373	0.707187	0.657106	0.698846	0.679295	0.892489	0.805473	0.672872
38.746	0.685638	0.712848	0.76388	0.684337	0.598926	0.804143	0.706385	0.655802	0.697796	0.677533	0.892489	0.804283	0.67234
38.768	0.685106	0.711664	0.763242	0.683735	0.598254	0.803913	0.705317	0.65515	0.697272	0.675771	0.891016	0.803093	0.671277
38.789	0.684043	0.711072	0.761966	0.682831	0.597583	0.803682	0.704515	0.653846	0.696222	0.674009	0.891016	0.801904	0.670213
38.811	0.682979	0.709888	0.760689	0.682229	0.596911	0.803222	0.703714	0.652542	0.695698	0.672247	0.889543	0.801309	0.669149
38.833	0.682447	0.709295	0.759413	0.681627	0.59624	0.802992	0.702912	0.651239	0.694648	0.670485	0.889543	0.800119	0.668617
38.855	0.681383	0.708111	0.758137	0.681024	0.595568	0.802762	0.702111	0.649935	0.693599	0.668722	0.888071	0.798929	0.667553
38.876	0.680319	0.707519	0.757498	0.68012	0.594897	0.802532	0.701309	0.648631	0.693075	0.66696	0.886598	0.797739	0.666489
38.898	0.679787	0.706335	0.756222	0.679518	0.594002	0.802301	0.70024	0.647327	0.692025	0.665198	0.886598	0.79655	0.665426
38.92	0.678723	0.705743	0.754946	0.678916	0.59333	0.801841	0.699439	0.646023	0.691501	0.663436	0.885125	0.79536	0.664362
38.942	0.67766	0.704559	0.753669	0.678313	0.592659	0.801611	0.698637	0.64472	0.690451	0.661674	0.885125	0.794765	0.663298
38.963	0.676596	0.703375	0.752393	0.67741	0.591764	0.801381	0.697569	0.643416	0.689402	0.659912	0.883652	0.793575	0.662766
38.985	0.676064	0.702783	0.751117	0.676807	0.591092	0.800921	0.696767	0.642112	0.688877	0.65815	0.88218	0.792385	0.661702
39.007	0.675	0.701599	0.750479	0.676205	0.590197	0.80069	0.695966	0.640808	0.687828	0.655507	0.88218	0.791196	0.660638
39.029	0.673936	0.701007	0.749202	0.675301	0.589526	0.80046	0.694897	0.639505	0.686779	0.653744	0.880707	0.790006	0.659574
39.05	0.672872	0.699822	0.747926	0.674699	0.58863	0.8	0.694096	0.638201	0.686254	0.651982	0.879234	0.788816	0.658511
39.072	0.67234	0.698638	0.74665	0.674096	0.587959	0.79977	0.693294	0.636897	0.685205	0.65022	0.877761	0.787626	0.657447
39.094	0.671277	0.698046	0.745373	0.673193	0.587064	0.79931	0.692225	0.635593	0.684155	0.648458	0.877761	0.786437	0.656383
39.116	0.670213	0.696862	0.744097	0.67259	0.586168	0.799079	0.691424	0.634289	0.683631	0.646696	0.876289	0.785842	0.655319
39.137	0.669149	0.695678	0.742821	0.671687	0.585497	0.798619	0.690355	0.632986	0.682581	0.644934	0.874816	0.784652	0.654787
39.159	0.668617	0.695086	0.741544	0.671084	0.584602	0.798389	0.689554	0.631682	0.681532	0.643172	0.873343	0.783462	0.653723
39.181	0.667553	0.693902	0.740268	0.670482	0.583706	0.797929	0.688752	0.630378	0.681007	0.640529	0.87187	0.782272	0.65266
39.203	0.666489	0.692718	0.738992	0.669578	0.582811	0.797699	0.687684	0.629074	0.679958	0.638767	0.870398	0.781083	0.651596
39.224	0.665426	0.692126	0.737715	0.668976	0.581916	0.797238	0.686882	0.627771	0.678909	0.637004	0.868925	0.779893	0.650532
39.246	0.664362	0.690941	0.736439	0.668072	0.581021	0.797008	0.685814	0.626467	0.677859	0.635242	0.868925	0.778703	0.649468
39.268	0.663298	0.689757	0.735163	0.66747	0.580125	0.796548	0.685012	0.625163	0.677335	0.63348	0.867452	0.777513	0.648404
39.29	0.662766	0.689165	0.733886	0.666566	0.57923	0.796318	0.683943	0.623859	0.676285	0.631718	0.865979	0.776324	0.64734
39.311	0.661702	0.687981	0.73261	0.665964	0.578335	0.795857	0.683142	0.622555	0.675236	0.629956	0.864507	0.775134	0.646277
39.333	0.660638	0.686797	0.731334	0.665361	0.57744	0.795627	0.682073	0.621252	0.674187	0.627313	0.863034	0.773944	0.645213
39.355	0.659574	0.685613	0.730057	0.664458	0.576544	0.795167	0.681005	0.619296	0.673662	0.625551	0.861561	0.773349	0.644149
39.377	0.658511	0.685021	0.728781	0.663855	0.575425	0.794707	0.680203	0.617992	0.672613	0.623789	0.860088	0.772159	0.643085
39.398	0.657447	0.683837	0.727505	0.662952	0.57453	0.794476	0.679134	0.616688	0.671563	0.622026	0.858616	0.77097	0.642021
39.42	0.656383	0.682652	0.726228	0.662349	0.573635	0.794016	0.678333	0.615385	0.670514	0.620264	0.857143	0.76978	0.640957
39.442	0.655319	0.681468	0.724952	0.661446	0.572516	0.793786	0.677264	0.614081	0.669465	0.617621	0.85567	0.76859	0.639894
39.464	0.654787	0.680876	0.723676	0.660843	0.57162	0.793326	0.676196	0.612777	0.668416	0.615859	0.852725	0.7674	0.639362
39.485	0.653723	0.679692	0.722399	0.65994	0.570501	0.792865	0.675394	0.610821	0.667891	0.614097	0.851252	0.766211	0.638298
39.507	0.65266	0.678508	0.721123	0.659337	0.569606	0.792635	0.674325	0.609518	0.666842	0.612335	0.849779	0.765021	0.637234
39.529	0.651596	0.677324	0.719847	0.658434	0.568487	0.792175	0.673257	0.608214	0.665792	0.610573	0.848306	0.763831	0.63617
39.551	0.650532	0.676732	0.717932	0.657831	0.567368	0.791945	0.672455	0.60691	0.664743	0.60793	0.846834	0.762641	0.635106
39.572	0.649468	0.675548	0.716656	0.656928	0.566473	0.791484	0.671387	0.604954	0.663694	0.606167	0.845361	0.761452	0.634043
39.594	0.648404	0.674364	0.71538	0.656325	0.565354	0.791024	0.670318	0.603651	0.662644	0.604405	0.843888	0.760262	0.632979
39.616	0.64734	0.673179	0.714103	0.655422	0.564235	0.790794	0.669516	0.602347	0.661595	0.602643	0.842415	0.759072	0.631915
39.638	0.646277	0.671995	0.712827	0.654819	0.563115	0.790334	0.668448	0.601043	0.660546	0.6	0.83947	0.757882	0.630851
39.659	0.645213	0.671403	0.711551	0.653916	0.561996	0.790104	0.667379	0.599087	0.659496	0.598238	0.837997	0.756692	0.629787
39.681	0.644149	0.670219	0.709636	0.653313	0.560877	0.789643	0.66631	0.597784	0.658447	0.596476	0.836524	0.755503	0.628723
39.703	0.643085	0.669035	0.70836	0.65241	0.559758	0.789183	0.665509	0.59648	0.657398	0.594714	0.835052	0.754313	0.62766
39.725	0.642021	0.667851	0.707084	0.651807	0.558639	0.788953	0.66444	0.594524	0.656348	0.592952	0.833579	0.753123	0.626596
39.746	0.640957	0.666667	0.705807	0.650904	0.55752	0.788493	0.663372	0.59322	0.655299	0.590308	0.830633	0.751933	0.625532
39.768	0.639894	0.665483	0.704531	0.650301	0.556401	0.788032	0.662303	0.591917	0.65425	0.588546	0.829161	0.750149	0.624468
39.79	0.639362	0.664298	0.702616	0.649398	0.555282	0.787802	0.661501	0.590613	0.6532	0.586784	0.827688	0.748959	0.623404
39.812	0.638298	0.663706	0.70134	0.648494	0.553939	0.787342	0.660433	0.588657	0.652151	0.585022	0.826215	0.747769	0.62234
39.833	0.637234	0.662522	0.700064	0.647892	0.55282	0.786881	0.659364	0.587353	0.651102	0.582379	0.82327	0.746579	0.620745
39.855	0.63617	0.661338	0.698149	0.646988	0.551701	0.786651	0.658295	0.585398	0.650052	0.580617	0.821797	0.74539	0.619681
39.877	0.635106	0.660154	0.696873	0.646386	0.550358	0.786191	0.657227	0.584094	0.649003	0.578855	0.820324	0.7442	0.618617
39.899	0.634043	0.65897	0.695597	0.645482	0.549239	0.785961	0.656158	0.58279	0.647954	0.576211	0.818851	0.74301	0.617553
39.92	0.632979	0.657786	0.693682	0.64488	0.547896	0.785501	0.655357	0.580834	0.646905	0.574449	0.815906	0.74182	0.616489
39.942	0.631915	0.656602	0.692406	0.643976	0.546777	0.78504	0.654288	0.579531	0.645855	0.572687	0.814433	0.740631	0.615426
39.964	0.630851	0.655417	0.69113	0.643072	0.545434	0.78481	0.653219	0.578227	0.644806	0.570925	0.81296	0.739441	0.614362
39.986	0.629787	0.654825	0.689215	0.64247	0.544315	0.78435	0.652151	0.576271	0.643232	0.568282	0.811487	0.737656	0.613298
40.007	0.628723	0.653641	0.687939	0.641566	0.542972	0.78389	0.651082	0.574967	0.642183	0.56652	0.808542	0.736466	0.612234
40.029	0.62766	0.652457	0.686662	0.640663	0.541629	0.783659	0.650013	0.573012	0.641133	0.564758	0.807069	0.735277	0.61117
40.051	0.626596	0.651273	0.684748	0.64006	0.54051	0.783199	0.648945	0.571708	0.640084	0.562115	0.805596	0.734087	0.610106
40.072	0.625532	0.650089	0.683472	0.639157	0.539167	0.782739	0.647876	0.569752	0.639035	0.560352	0.802651	0.732897	0.609043
40.094	0.624468	0.648905	0.681557	0.638253	0.537825	0.782509	0.646807	0.568449	0.637985	0.55859	0.801178	0.731707	0.607979
40.116	0.623404	0.647721	0.680281	0.637651	0.536482	0.782048	0.645739	0.567145	0.636411	0.556828	0.799705	0.729923	0.606915
40.138	0.62234	0.646536	0.679004	0.636747	0.535139	0.781588	0.64467	0.565189	0.635362	0.554185	0.798233	0.728733	0.605851
40.159	0.620745	0.645352	0.67709	0.635843	0.53402	0.781358	0.643601	0.563885	0.634313	0.552423	0.795287	0.727543	0.604787
40.181	0.619681	0.644168	0.675814	0.635241	0.532677	0.780898	0.642533	0.56193	0.633263	0.550661	0.793814	0.726353	0.603723
40.203	0.618617	0.642984	0.673899	0.634337	0.531334	0.780437	0.641464	0.560626	0.631689	0.548018	0.792342	0.725164	0.60266
40.225	0.617553	0.6418	0.672623	0.633434	0.529991	0.780207	0.640395	0.55867	0.63064	0.546256	0.789396	0.723379	0.601596
40.246	0.616489	0.640616	0.670708	0.632831	0.528648	0.779747	0.639327	0.557366	0.629591	0.544493	0.787923	0.722189	0.6
40.268	0.615426	0.639432	0.669432	0.631928	0.527305	0.779287	0.638258	0.555411	0.628541	0.54185	0.786451	0.720999	0.598936
40.29	0.614362	0.638247	0.667518	0.631024	0.525962	0.779056	0.636922	0.554107	0.626967	0.540088	0.784978	0.71981	0.597872
40.312	0.613298	0.637063	0.666241	0.63012	0.52462	0.778596	0.635854	0.552151	0.625918	0.538326	0.782032	0.71862	0.596809
40.333	0.612234	0.635879	0.664327	0.629518	0.523053	0.778136	0.634785	0.550847	0.624869	0.535683	0.78056	0.716835	0.595745
40.355	0.61117	0.634695	0.662412	0.628614	0.52171	0.777906	0.633716	0.548892	0.623295	0.533921	0.779087	0.715645	0.594681
40.377	0.610106	0.633511	0.661136	0.627711	0.520367	0.777445	0.632648	0.547588	0.622246	0.532159	0.776141	0.714456	0.593617
40.399	0.609043	0.632327	0.659221	0.626807	0.519024	0.776985	0.631312	0.545632	0.620672	0.529515	0.774669	0.713266	0.592553
40.42	0.607979	0.631143	0.657945	0.625904	0.517681	0.776755	0.630243	0.544329	0.619622	0.527753	0.773196	0.711481	0.591489
40.442	0.606915	0.629959	0.656031	0.625301	0.516115	0.776295	0.629174	0.542373	0.618573	0.525991	0.77025	0.710291	0.590426
40.464	0.605851	0.628774	0.654754	0.624398	0.514772	0.775834	0.628106	0.540417	0.616999	0.523348	0.768778	0.709102	0.58883
40.486	0.604787	0.62759	0.65284	0.623494	0.513429	0.775374	0.62677	0.539113	0.61595	0.521586	0.767305	0.707912	0.587766
40.507	0.603723	0.626406	0.650925	0.62259	0.511862	0.775144	0.625701	0.537158	0.614376	0.519824	0.765832	0.706127	0.586702
40.529	0.60266	0.625222	0.649649	0.621687	0.510519	0.774684	0.624633	0.535854	0.613326	0.517181	0.762887	0.704938	0.585638
40.551	0.601596	0.624038	0.647735	0.620783	0.509176	0.774223	0.623297	0.533898	0.612277	0.515419	0.761414	0.703748	0.584574
40.573	0.6	0.622854	0.64582	0.61988	0.50761	0.773763	0.622228	0.532595	0.610703	0.513656	0.759941	0.701963	0.583511
40.594	0.598936	0.62167	0.644544	0.618976	0.506267	0.773533	0.620892	0.530639	0.609654	0.511013	0.756996	0.700773	0.582447
40.616	0.597872	0.620485	0.642629	0.618072	0.504924	0.773072	0.619824	0.528683	0.60808	0.509251	0.755523	0.699584	0.581383
40.638	0.596809	0.618709	0.640715	0.617169	0.503357	0.772612	0.618755	0.527379	0.60703	0.507489	0.75405	0.697799	0.579787
40.66	0.595745	0.617525	0.639438	0.616265	0.502014	0.772152	0.617419	0.525424	0.605456	0.504846	0.751105	0.696609	0.578723
40.681	0.594681	0.616341	0.637524	0.615361	0.500448	0.771922	0.616351	0.52412	0.604407	0.503084	0.749632	0.695419	0.57766
40.703	0.593617	0.615157	0.635609	0.614458	0.499105	0.771461	0.615015	0.522164	0.602833	0.501322	0.748159	0.693635	0.576596
40.725	0.592553	0.613973	0.634333	0.613554	0.497538	0.771001	0.613946	0.520209	0.601784	0.498678	0.745214	0.692445	0.575532
40.747	0.591489	0.612789	0.632419	0.612651	0.496195	0.770541	0.61261	0.518905	0.60021	0.496916	0.743741	0.691255	0.574468
40.768	0.590426	0.611604	0.630504	0.611747	0.494628	0.770081	0.611542	0.516949	0.598636	0.495154	0.740795	0.689471	0.572872
40.79	0.58883	0.609828	0.629228	0.610843	0.493286	0.76962	0.610206	0.514993	0.597587	0.492511	0.739323	0.688281	0.571809
40.812	0.587766	0.608644	0.627313	0.60994	0.491719	0.76916	0.60887	0.51369	0.596013	0.490749	0.73785	0.687091	0.570745
40.834	0.586702	0.60746	0.625399	0.609036	0.490376	0.7687	0.607801	0.511734	0.594963	0.488987	0.734904	0.685306	0.569681
40.855	0.585638	0.606276	0.623484	0.608133	0.488809	0.768239	0.606465	0.51043	0.593389	0.486344	0.733432	0.684117	0.568617
40.877	0.584574	0.605092	0.62157	0.607229	0.487466	0.768009	0.605397	0.508475	0.59234	0.484581	0.731959	0.682332	0.567553
40.899	0.583511	0.603316	0.620294	0.606024	0.4859	0.767549	0.604061	0.506519	0.590766	0.481938	0.729013	0.681142	0.565957
40.921	0.582447	0.602131	0.618379	0.60512	0.484557	0.767089	0.602725	0.505215	0.589192	0.480176	0.727541	0.679952	0.564894
40.942	0.581383	0.600947	0.616465	0.604217	0.48299	0.766628	0.601656	0.503259	0.588143	0.478414	0.724595	0.678168	0.56383
40.964	0.579787	0.599763	0.61455	0.603313	0.481647	0.765938	0.600321	0.501304	0.586569	0.475771	0.723122	0.676978	0.562766
40.986	0.578723	0.597987	0.613274	0.602108	0.480081	0.765478	0.598985	0.5	0.584995	0.474009	0.721649	0.675193	0.561702
41.008	0.57766	0.596803	0.611359	0.601205	0.478738	0.765017	0.597649	0.498044	0.583945	0.472247	0.718704	0.674004	0.560106
41.029	0.576596	0.595619	0.609445	0.600301	0.477171	0.764557	0.59658	0.496089	0.582371	0.469604	0.717231	0.672814	0.559043
41.051	0.575532	0.593843	0.60753	0.599398	0.475828	0.764097	0.595244	0.494785	0.580797	0.467841	0.714286	0.671029	0.557979
41.073	0.574468	0.592658	0.605616	0.598193	0.474261	0.763636	0.593909	0.492829	0.579748	0.466079	0.712813	0.669839	0.556915
41.095	0.572872	0.591474	0.603701	0.597289	0.472919	0.763176	0.592573	0.490874	0.578174	0.463436	0.709867	0.668055	0.555851
41.116	0.571809	0.589698	0.601787	0.596386	0.471352	0.762716	0.591504	0.488918	0.5766	0.461674	0.708395	0.666865	0.554255
41.138	0.570745	0.588514	0.600511	0.595181	0.470009	0.762025	0.590168	0.487614	0.575551	0.459031	0.705449	0.66508	0.553191
41.16	0.569681	0.58733	0.598596	0.594277	0.468442	0.761565	0.588832	0.485658	0.573977	0.457269	0.703976	0.663891	0.552128
41.182	0.568617	0.585554	0.596682	0.593072	0.467099	0.761105	0.587497	0.483703	0.572403	0.455507	0.701031	0.662106	0.551064
41.203	0.567553	0.584369	0.594767	0.592169	0.465533	0.760644	0.586161	0.482399	0.571354	0.452863	0.699558	0.660916	0.549468
41.225	0.565957	0.582593	0.592853	0.590964	0.46419	0.759954	0.584825	0.480443	0.56978	0.451101	0.696613	0.659131	0.548404
41.247	0.564894	0.581409	0.590938	0.59006	0.462623	0.759494	0.583756	0.478488	0.568206	0.449339	0.69514	0.657942	0.54734
41.269	0.56383	0.580225	0.589024	0.589157	0.46128	0.759033	0.582421	0.476532	0.566632	0.446696	0.692194	0.656157	0.546277
41.29	0.562766	0.578449	0.587109	0.587952	0.459714	0.758343	0.581085	0.475228	0.565582	0.444934	0.690722	0.654967	0.544681
41.312	0.561702	0.577265	0.585195	0.586747	0.458371	0.757883	0.579749	0.473272	0.564008	0.442291	0.687776	0.653183	0.543617
41.334	0.560106	0.575488	0.583918	0.585843	0.456804	0.757192	0.578413	0.471317	0.562434	0.440529	0.686303	0.651993	0.542553
41.356	0.559043	0.574304	0.582004	0.584639	0.455461	0.756732	0.577077	0.469361	0.56086	0.438767	0.683358	0.650208	0.540957
41.377	0.557979	0.572528	0.580089	0.583735	0.453894	0.756041	0.575741	0.468057	0.559286	0.436123	0.681885	0.649018	0.539894
41.399	0.556915	0.571344	0.578175	0.58253	0.452551	0.755581	0.574406	0.466102	0.558237	0.434361	0.67894	0.647234	0.53883
41.421	0.555851	0.569568	0.57626	0.581627	0.450985	0.754891	0.57307	0.464146	0.556663	0.432599	0.675994	0.646044	0.537766
41.443	0.554255	0.568384	0.574346	0.580422	0.449642	0.75443	0.571734	0.46219	0.555089	0.429956	0.674521	0.644259	0.53617
41.464	0.553191	0.566607	0.572431	0.579217	0.448075	0.75374	0.570398	0.460887	0.553515	0.428194	0.671576	0.64307	0.535106
41.486	0.552128	0.565423	0.570517	0.578313	0.446732	0.75328	0.569062	0.458931	0.551941	0.425551	0.670103	0.641285	0.534043
41.508	0.551064	0.563647	0.568602	0.577108	0.445166	0.752589	0.567726	0.456975	0.550367	0.423789	0.667158	0.6395	0.532447
41.53	0.549468	0.561871	0.566688	0.575904	0.443823	0.751899	0.566391	0.45502	0.548793	0.422026	0.664212	0.638311	0.531383
41.551	0.548404	0.560687	0.564773	0.575	0.442256	0.751438	0.565055	0.453716	0.547744	0.419383	0.662739	0.636526	0.530319
41.573	0.54734	0.558911	0.562859	0.573795	0.440913	0.750748	0.563719	0.45176	0.54617	0.417621	0.659794	0.635336	0.528723
41.595	0.546277	0.557726	0.560944	0.57259	0.439346	0.750058	0.562383	0.449804	0.544596	0.415859	0.658321	0.633551	0.52766
41.617	0.544681	0.55595	0.55903	0.571687	0.438004	0.749597	0.561047	0.447849	0.543022	0.413216	0.655376	0.631767	0.526596
41.638	0.543617	0.554174	0.557116	0.570482	0.436437	0.748907	0.559711	0.445893	0.541448	0.411454	0.65243	0.630577	0.525
41.66	0.542553	0.55299	0.555201	0.569277	0.435094	0.748216	0.558108	0.444589	0.539874	0.408811	0.650957	0.628792	0.523936
41.682	0.540957	0.551214	0.553287	0.568072	0.433751	0.747526	0.556773	0.442634	0.5383	0.407048	0.648012	0.627008	0.52234
41.704	0.539894	0.549438	0.551372	0.567169	0.432184	0.747066	0.555437	0.440678	0.536726	0.405286	0.645066	0.625818	0.521277
41.725	0.53883	0.547661	0.549458	0.565964	0.430842	0.746375	0.554101	0.438722	0.535152	0.402643	0.643594	0.624033	0.520213
41.747	0.537766	0.546477	0.547543	0.564759	0.429275	0.745685	0.552765	0.436767	0.533578	0.400881	0.640648	0.622249	0.518617
41.769	0.53617	0.544701	0.54499	0.563554	0.427932	0.744994	0.551429	0.435463	0.532004	0.399119	0.637703	0.621059	0.517553
41.791	0.535106	0.542925	0.543076	0.562349	0.426365	0.744304	0.550094	0.433507	0.53043	0.396476	0.63623	0.619274	0.515957
41.812	0.534043	0.541741	0.541161	0.561145	0.425022	0.743613	0.548491	0.431551	0.528856	0.394714	0.633284	0.61749	0.514894
41.834	0.532447	0.539964	0.539247	0.560241	0.423456	0.742923	0.547155	0.429596	0.527282	0.392952	0.630339	0.6163	0.51383
41.856	0.531383	0.538188	0.537332	0.559036	0.422113	0.742232	0.545819	0.42764	0.525708	0.390308	0.628866	0.614515	0.512234
41.877	0.530319	0.536412	0.535418	0.557831	0.420546	0.741542	0.544483	0.425684	0.524134	0.388546	0.62592	0.612731	0.51117
41.899	0.528723	0.534636	0.533504	0.556627	0.419203	0.740852	0.543147	0.424381	0.52256	0.385903	0.622975	0.610946	0.509574
41.921	0.52766	0.533452	0.531589	0.555422	0.417637	0.740161	0.541544	0.422425	0.520986	0.384141	0.621502	0.609756	0.508511
41.943	0.526596	0.531676	0.529036	0.554217	0.416294	0.739471	0.540208	0.420469	0.519412	0.382379	0.618557	0.607971	0.506915
41.964	0.525	0.529899	0.527122	0.553012	0.414727	0.73878	0.538873	0.418514	0.517838	0.379736	0.615611	0.606187	0.505851
41.986	0.523936	0.528123	0.525207	0.551807	0.41316	0.73809	0.537537	0.416558	0.516264	0.377974	0.614138	0.604402	0.504255
42.008	0.52234	0.526347	0.523293	0.550602	0.411817	0.737399	0.536201	0.414602	0.51469	0.376211	0.611193	0.603212	0.503191
42.03	0.521277	0.524571	0.521378	0.549398	0.410251	0.736479	0.534598	0.412647	0.513116	0.373568	0.608247	0.601428	0.501596
42.051	0.520213	0.522795	0.519464	0.548193	0.408908	0.735788	0.533262	0.411343	0.511018	0.371806	0.606775	0.599643	0.500532
42.073	0.518617	0.521018	0.516911	0.546988	0.407341	0.735098	0.531926	0.409387	0.509444	0.370044	0.603829	0.597858	0.498936
42.095	0.517553	0.519242	0.514997	0.545783	0.405998	0.734407	0.530323	0.407432	0.50787	0.367401	0.600884	0.596074	0.497872
42.117	0.515957	0.518058	0.513082	0.544578	0.404432	0.733487	0.528987	0.405476	0.506296	0.365639	0.597938	0.594884	0.496277
42.138	0.514894	0.516282	0.511168	0.543373	0.403089	0.732796	0.527652	0.40352	0.504722	0.363877	0.596465	0.593099	0.495213
42.16	0.51383	0.514506	0.509253	0.542169	0.401522	0.731876	0.526316	0.401565	0.503148	0.361233	0.59352	0.591315	0.493617
42.182	0.512234	0.512729	0.506701	0.540964	0.400179	0.731185	0.524713	0.399609	0.501574	0.359471	0.590574	0.58953	0.492553
42.204	0.51117	0.510953	0.504786	0.539759	0.398612	0.730495	0.523377	0.398305	0.499475	0.357709	0.589102	0.587745	0.490957
42.225	0.509574	0.509177	0.502872	0.538554	0.397046	0.729574	0.522041	0.396349	0.497901	0.355066	0.586156	0.585961	0.489894
42.247	0.508511	0.507401	0.500319	0.537349	0.395703	0.728884	0.520438	0.394394	0.496327	0.353304	0.583211	0.584176	0.488298
42.269	0.506915	0.505625	0.498405	0.536145	0.394136	0.727963	0.519102	0.392438	0.494753	0.351542	0.581738	0.582391	0.486702
42.291	0.505851	0.503848	0.49649	0.53494	0.392793	0.727043	0.517766	0.390482	0.492655	0.348899	0.578792	0.581202	0.485638
42.312	0.504255	0.502072	0.494576	0.533434	0.391226	0.726352	0.516164	0.388527	0.491081	0.347137	0.57732	0.579417	0.484043
42.334	0.503191	0.500296	0.492023	0.532229	0.389884	0.725432	0.514828	0.386571	0.489507	0.345374	0.574374	0.577632	0.482979
42.356	0.501596	0.49852	0.490108	0.531024	0.388317	0.724511	0.513492	0.384615	0.487933	0.342731	0.571429	0.575848	0.481383
42.378	0.500532	0.496744	0.488194	0.529819	0.38675	0.72382	0.511889	0.383312	0.485834	0.340969	0.569956	0.574063	0.480319
42.399	0.498936	0.494967	0.485641	0.528614	0.385407	0.7229	0.510553	0.381356	0.48426	0.339207	0.56701	0.572278	0.478723
42.421	0.497872	0.492599	0.483727	0.52741	0.383841	0.721979	0.50895	0.3794	0.482686	0.336564	0.564065	0.570494	0.477128
42.443	0.496277	0.490823	0.481812	0.525904	0.382498	0.721059	0.507614	0.377445	0.480588	0.334802	0.562592	0.568709	0.476064
42.465	0.495213	0.489047	0.47926	0.524699	0.380931	0.720138	0.506278	0.375489	0.479014	0.33304	0.559647	0.566924	0.474468
42.486	0.493617	0.487271	0.477345	0.523494	0.379364	0.719217	0.504675	0.373533	0.47744	0.331278	0.558174	0.56514	0.472872
42.508	0.492553	0.485494	0.475431	0.522289	0.378021	0.718527	0.50334	0.371578	0.475341	0.328634	0.555228	0.563355	0.471809
42.53	0.490957	0.483718	0.472878	0.520783	0.376455	0.717376	0.501737	0.369622	0.473767	0.326872	0.552283	0.56157	0.470213
42.552	0.489894	0.481942	0.470964	0.519578	0.375112	0.716456	0.500401	0.368318	0.472193	0.32511	0.55081	0.559786	0.468617
42.573	0.488298	0.480166	0.468411	0.518373	0.373545	0.715535	0.498798	0.366362	0.470094	0.322467	0.547865	0.558001	0.467553
42.595	0.486702	0.47839	0.466496	0.516867	0.372202	0.714614	0.497462	0.364407	0.46852	0.320705	0.546392	0.556217	0.465957
42.617	0.485638	0.476613	0.464582	0.515663	0.370636	0.713694	0.495859	0.362451	0.466422	0.318943	0.543446	0.554432	0.464362
42.639	0.484043	0.474245	0.462029	0.514458	0.369293	0.712773	0.494523	0.360495	0.464848	0.317181	0.540501	0.552647	0.463298
42.66	0.482979	0.472469	0.460115	0.512952	0.367726	0.711853	0.49292	0.35854	0.463274	0.314537	0.539028	0.550863	0.461702
42.682	0.481383	0.470693	0.457562	0.511747	0.366159	0.710702	0.491584	0.356584	0.461175	0.312775	0.536082	0.549078	0.460106
42.704	0.480319	0.468917	0.455648	0.510241	0.364816	0.709781	0.489981	0.354628	0.459601	0.311013	0.53461	0.546698	0.459043
42.726	0.478723	0.46714	0.453095	0.509036	0.36325	0.708631	0.488378	0.353325	0.457503	0.30837	0.531664	0.544914	0.457447
42.747	0.477128	0.465364	0.451181	0.507831	0.361907	0.70771	0.487042	0.351369	0.455929	0.306608	0.530191	0.543129	0.455851
42.769	0.476064	0.463588	0.449266	0.506325	0.36034	0.706559	0.485439	0.349413	0.45383	0.304846	0.527246	0.541344	0.454255
42.791	0.474468	0.46122	0.446713	0.50512	0.358997	0.705639	0.484104	0.347458	0.452256	0.303084	0.5243	0.53956	0.453191
42.813	0.472872	0.459443	0.444799	0.503614	0.357431	0.704488	0.482501	0.345502	0.450157	0.301322	0.522828	0.537775	0.451596
42.834	0.471809	0.457667	0.442246	0.50241	0.356088	0.703337	0.480898	0.343546	0.448583	0.298678	0.519882	0.53599	0.45
42.856	0.470213	0.455891	0.440332	0.500904	0.354521	0.702417	0.479562	0.341591	0.446485	0.296916	0.518409	0.534206	0.448936
42.878	0.468617	0.454115	0.437779	0.499699	0.353178	0.701266	0.477959	0.339635	0.444911	0.295154	0.515464	0.531826	0.44734
42.9	0.467553	0.451747	0.435865	0.498193	0.351611	0.700115	0.476356	0.338331	0.442812	0.293392	0.513991	0.530042	0.445745
42.921	0.465957	0.44997	0.433312	0.496988	0.350269	0.698964	0.47502	0.336375	0.441238	0.290749	0.511046	0.528257	0.444149
42.943	0.464362	0.448194	0.431398	0.495482	0.348702	0.697814	0.473417	0.33442	0.43914	0.288987	0.509573	0.526472	0.442553
42.965	0.463298	0.446418	0.428845	0.493976	0.347359	0.696663	0.471814	0.332464	0.437566	0.287225	0.506627	0.524688	0.441489
42.987	0.461702	0.444642	0.42693	0.492771	0.345792	0.695512	0.470211	0.330508	0.435467	0.285463	0.505155	0.522308	0.439894
43.008	0.460106	0.442274	0.424378	0.491265	0.344449	0.694361	0.468875	0.328553	0.433893	0.2837	0.502209	0.520523	0.438298
43.03	0.459043	0.440497	0.422463	0.489759	0.342883	0.693211	0.467272	0.326597	0.431794	0.281057	0.499264	0.518739	0.436702
43.052	0.457447	0.438721	0.419911	0.488554	0.34154	0.69206	0.465669	0.325293	0.429696	0.279295	0.497791	0.516954	0.435106
43.074	0.455851	0.436945	0.417996	0.487048	0.339973	0.690679	0.464066	0.323338	0.428122	0.277533	0.494845	0.514575	0.434043
43.095	0.454255	0.434577	0.415444	0.485542	0.33863	0.689528	0.462463	0.321382	0.426023	0.275771	0.493373	0.51279	0.432447
43.117	0.453191	0.4328	0.413529	0.484337	0.337064	0.688147	0.46086	0.319426	0.424449	0.274009	0.490427	0.511005	0.430851
43.139	0.451596	0.431024	0.410976	0.482831	0.335721	0.686997	0.459257	0.317471	0.42235	0.271366	0.488954	0.509221	0.429255
43.161	0.45	0.429248	0.409062	0.481325	0.334154	0.685616	0.457654	0.315515	0.420252	0.269604	0.486009	0.506841	0.42766
43.182	0.448936	0.42688	0.406509	0.479819	0.332811	0.684465	0.456318	0.314211	0.418678	0.267841	0.484536	0.505057	0.426064
43.204	0.44734	0.425104	0.403957	0.478614	0.331244	0.683084	0.454715	0.312256	0.416579	0.266079	0.481591	0.503272	0.424468
43.226	0.445745	0.423327	0.402042	0.477108	0.329902	0.681703	0.453112	0.3103	0.414481	0.264317	0.480118	0.500892	0.423404
43.248	0.444149	0.420959	0.399489	0.475602	0.328335	0.680322	0.451509	0.308344	0.412907	0.262555	0.477172	0.499108	0.421809
43.269	0.442553	0.419183	0.397575	0.474096	0.326992	0.679171	0.449906	0.306389	0.410808	0.259912	0.474227	0.497323	0.420213
43.291	0.441489	0.417407	0.395022	0.47259	0.325425	0.677791	0.448036	0.304433	0.408709	0.25815	0.472754	0.494943	0.418617
43.313	0.439894	0.415038	0.393108	0.471084	0.324082	0.67641	0.446433	0.303129	0.407135	0.256388	0.469809	0.493159	0.417021
43.335	0.438298	0.413262	0.390555	0.46988	0.322516	0.675029	0.44483	0.301173	0.405037	0.254626	0.468336	0.490779	0.415426
43.356	0.436702	0.411486	0.388641	0.468373	0.321173	0.673418	0.443227	0.299218	0.402938	0.252863	0.46539	0.488995	0.41383
43.378	0.435106	0.40971	0.386088	0.466867	0.319606	0.672037	0.441624	0.297262	0.400839	0.251101	0.463918	0.48721	0.412234
43.4	0.434043	0.407342	0.384174	0.465361	0.318263	0.670656	0.440021	0.295306	0.399265	0.249339	0.460972	0.48483	0.410638
43.422	0.432447	0.405565	0.381621	0.463855	0.316697	0.669275	0.438418	0.294003	0.397167	0.247577	0.459499	0.483046	0.409043
43.443	0.430851	0.403789	0.379068	0.462349	0.315354	0.667894	0.436815	0.292047	0.395068	0.245815	0.456554	0.480666	0.407447
43.465	0.429255	0.401421	0.377154	0.460843	0.313787	0.666283	0.434945	0.290091	0.393494	0.243172	0.453608	0.478882	0.405851
43.487	0.42766	0.399645	0.374601	0.459337	0.312444	0.664902	0.433342	0.288136	0.391396	0.24141	0.452135	0.476502	0.404255
43.509	0.426064	0.397869	0.372687	0.457831	0.310877	0.663291	0.431739	0.28618	0.389297	0.239648	0.44919	0.474717	0.403191
43.53	0.424468	0.3955	0.370134	0.456325	0.309311	0.66191	0.430136	0.284876	0.387198	0.237885	0.447717	0.472338	0.401596
43.552	0.423404	0.393724	0.36822	0.454819	0.307968	0.660299	0.428266	0.28292	0.385624	0.236123	0.444772	0.470553	0.4
43.574	0.421809	0.391356	0.365667	0.453313	0.306401	0.658918	0.426663	0.280965	0.383526	0.234361	0.441826	0.468174	0.398404
43.596	0.420213	0.38958	0.363752	0.451807	0.304834	0.657307	0.42506	0.279009	0.381427	0.232599	0.440353	0.466389	0.396809
43.617	0.418617	0.387803	0.3612	0.450301	0.303491	0.655696	0.42319	0.277053	0.379328	0.230837	0.437408	0.46401	0.394681
43.639	0.417021	0.385435	0.358647	0.448494	0.301925	0.654315	0.421587	0.27575	0.37723	0.229075	0.434462	0.462225	0.393085
43.661	0.415426	0.383659	0.356733	0.446988	0.300358	0.652704	0.419984	0.273794	0.375656	0.227313	0.43299	0.459845	0.391489
43.682	0.41383	0.381883	0.35418	0.445482	0.299015	0.651093	0.418114	0.271838	0.373557	0.225551	0.430044	0.458061	0.389894
43.704	0.412234	0.379515	0.352265	0.443976	0.297449	0.649482	0.416511	0.269883	0.371459	0.223789	0.427099	0.455681	0.388298
43.726	0.410638	0.377738	0.349713	0.44247	0.295882	0.647871	0.414641	0.268579	0.36936	0.222026	0.425626	0.453896	0.386702
43.748	0.409043	0.37537	0.347798	0.440964	0.294315	0.64626	0.413038	0.266623	0.367261	0.220264	0.42268	0.451517	0.385106
43.769	0.407447	0.373594	0.345246	0.439157	0.292748	0.644879	0.411168	0.264668	0.365687	0.218502	0.419735	0.449732	0.383511
43.791	0.405851	0.371818	0.343331	0.437651	0.291406	0.643268	0.409565	0.262712	0.363589	0.21674	0.416789	0.447353	0.381915
43.813	0.404255	0.369449	0.340779	0.436145	0.289839	0.641657	0.407962	0.261408	0.36149	0.214978	0.415317	0.444973	0.380319
43.835	0.403191	0.367673	0.338864	0.434639	0.288272	0.640046	0.406091	0.259452	0.359391	0.213216	0.412371	0.443189	0.378723
43.856	0.401596	0.365305	0.336311	0.432831	0.286705	0.638435	0.404221	0.257497	0.357293	0.211454	0.409426	0.440809	0.377128
43.878	0.4	0.363529	0.333759	0.431325	0.285139	0.636594	0.402618	0.255541	0.355194	0.209692	0.40648	0.439024	0.375532
43.9	0.398404	0.36116	0.331844	0.429819	0.283572	0.634983	0.400748	0.254237	0.35362	0.20793	0.405007	0.436645	0.373404
43.922	0.396809	0.359384	0.329292	0.428012	0.282005	0.633372	0.399145	0.252282	0.351522	0.206167	0.402062	0.434265	0.371809
43.943	0.394681	0.357608	0.327377	0.426506	0.280439	0.631761	0.397275	0.250326	0.349423	0.204405	0.399116	0.432481	0.370213
43.965	0.393085	0.35524	0.324825	0.425	0.278872	0.63015	0.395672	0.24837	0.347324	0.202643	0.396171	0.430101	0.368617
43.987	0.391489	0.353464	0.32291	0.423193	0.277305	0.628539	0.393802	0.247066	0.345226	0.200881	0.393225	0.427722	0.367021
44.009	0.389894	0.351095	0.320357	0.421687	0.275739	0.626928	0.391932	0.245111	0.343127	0.199119	0.391753	0.425937	0.365426
44.03	0.388298	0.349319	0.318443	0.420181	0.273948	0.625086	0.390329	0.243155	0.341028	0.197357	0.388807	0.423557	0.36383
44.052	0.386702	0.346951	0.31589	0.418373	0.272381	0.623475	0.388458	0.241199	0.33893	0.195595	0.385862	0.421178	0.361702
44.074	0.385106	0.345175	0.313976	0.416867	0.270815	0.621864	0.386588	0.239896	0.337356	0.193833	0.382916	0.419393	0.360106
44.096	0.383511	0.343398	0.311423	0.415361	0.269248	0.620253	0.384985	0.23794	0.335257	0.19207	0.379971	0.417014	0.358511
44.117	0.381915	0.34103	0.309509	0.413554	0.267681	0.618412	0.383115	0.235984	0.333158	0.191189	0.377025	0.414634	0.356915
44.139	0.380319	0.339254	0.306956	0.412048	0.265891	0.616801	0.381245	0.234681	0.33106	0.189427	0.37408	0.412849	0.355319
44.161	0.378723	0.336886	0.305041	0.410241	0.264324	0.61519	0.379642	0.232725	0.328961	0.187665	0.371134	0.41047	0.353191
44.183	0.377128	0.33511	0.302489	0.408735	0.262757	0.613349	0.377772	0.230769	0.326863	0.185903	0.369661	0.40809	0.351596
44.204	0.375532	0.332741	0.300574	0.406928	0.260967	0.611738	0.375902	0.228814	0.324764	0.184141	0.366716	0.405711	0.35
44.226	0.373404	0.330965	0.298022	0.405422	0.2594	0.610127	0.374299	0.22751	0.322665	0.182379	0.36377	0.403926	0.348404
44.248	0.371809	0.328597	0.296107	0.403614	0.257833	0.608285	0.372429	0.225554	0.320567	0.180617	0.360825	0.401547	0.346277
44.27	0.370213	0.326821	0.293555	0.402108	0.256043	0.606674	0.370558	0.223598	0.318993	0.178855	0.357879	0.399167	0.344681
44.291	0.368617	0.324452	0.29164	0.400301	0.254476	0.604833	0.368688	0.222295	0.316894	0.177974	0.354934	0.396788	0.343085
44.313	0.367021	0.322676	0.289726	0.398795	0.252686	0.603222	0.366818	0.220339	0.314795	0.176211	0.351988	0.395003	0.341489
44.335	0.365426	0.320308	0.287173	0.396988	0.251119	0.601611	0.365215	0.218383	0.312697	0.174449	0.349043	0.392623	0.339362
44.357	0.36383	0.318532	0.285258	0.395482	0.249329	0.59977	0.363345	0.21708	0.310598	0.172687	0.346097	0.390244	0.337766
44.378	0.361702	0.316755	0.282706	0.393675	0.247538	0.598159	0.361475	0.215124	0.308499	0.170925	0.343152	0.387864	0.33617
44.4	0.360106	0.314387	0.280791	0.392169	0.245971	0.596318	0.359605	0.213168	0.306401	0.169163	0.340206	0.385485	0.334043
44.422	0.358511	0.312611	0.278239	0.390361	0.244181	0.594707	0.357734	0.211864	0.304302	0.168282	0.337261	0.3837	0.332447
44.444	0.356915	0.310243	0.276324	0.388855	0.24239	0.592865	0.356131	0.209909	0.302204	0.16652	0.334315	0.381321	0.330851
44.465	0.355319	0.308467	0.273772	0.387048	0.240824	0.591254	0.354261	0.208605	0.300105	0.164758	0.33137	0.378941	0.328723
44.487	0.353191	0.306098	0.271857	0.385241	0.239033	0.589413	0.352391	0.206649	0.298006	0.162996	0.328424	0.376562	0.327128
44.509	0.351596	0.304322	0.269943	0.383735	0.237243	0.587802	0.350521	0.204694	0.295908	0.161233	0.325479	0.374182	0.325532
44.531	0.35	0.301954	0.26739	0.381928	0.235676	0.585961	0.348651	0.20339	0.293809	0.160352	0.322533	0.371802	0.323404
44.552	0.348404	0.300178	0.265475	0.380422	0.233885	0.58435	0.346781	0.201434	0.292235	0.15859	0.32106	0.370018	0.321809
44.574	0.346277	0.298401	0.262923	0.378614	0.232095	0.582509	0.34491	0.20013	0.290136	0.156828	0.318115	0.367638	0.320213
44.596	0.344681	0.296033	0.261008	0.376807	0.230304	0.580898	0.343308	0.198175	0.288038	0.155066	0.315169	0.365259	0.318085
44.618	0.343085	0.294257	0.259094	0.375301	0.228514	0.579056	0.341437	0.196219	0.285939	0.154185	0.312224	0.362879	0.316489
44.639	0.341489	0.291889	0.256541	0.373494	0.226723	0.577215	0.339567	0.194915	0.283841	0.152423	0.309278	0.3605	0.314894
44.661	0.339362	0.290112	0.254627	0.371988	0.225157	0.575604	0.337697	0.19296	0.281742	0.150661	0.306333	0.35812	0.312766
44.683	0.337766	0.287744	0.252074	0.370181	0.223366	0.573763	0.335827	0.191656	0.279643	0.148899	0.303387	0.355741	0.31117
44.705	0.33617	0.285968	0.25016	0.368373	0.221576	0.572152	0.333957	0.1897	0.277545	0.148018	0.300442	0.353361	0.309574
44.726	0.334043	0.284192	0.248245	0.366867	0.219785	0.570311	0.332087	0.187744	0.275446	0.146256	0.297496	0.350982	0.307447
44.748	0.332447	0.281824	0.245692	0.36506	0.217995	0.56847	0.330216	0.186441	0.273347	0.144493	0.294551	0.348602	0.305851
44.77	0.330851	0.280047	0.243778	0.363253	0.216204	0.566858	0.328346	0.184485	0.271249	0.143612	0.291605	0.346222	0.304255
44.792	0.328723	0.277679	0.241863	0.361747	0.214414	0.565017	0.326476	0.183181	0.26915	0.14185	0.28866	0.344438	0.302128
44.813	0.327128	0.275903	0.239311	0.35994	0.212623	0.563176	0.324606	0.181226	0.267051	0.140088	0.285714	0.342058	0.300532
44.835	0.325532	0.274127	0.237396	0.358133	0.210833	0.561565	0.322736	0.179922	0.264953	0.139207	0.282769	0.339679	0.298404
44.857	0.323404	0.271758	0.235482	0.356627	0.209042	0.559724	0.320866	0.177966	0.262854	0.137445	0.279823	0.337299	0.296809
44.879	0.321809	0.269982	0.233567	0.354819	0.207252	0.557883	0.318995	0.176662	0.260756	0.135683	0.278351	0.33492	0.295213
44.9	0.320213	0.267614	0.231015	0.353012	0.205461	0.556272	0.317125	0.174707	0.259182	0.134802	0.275405	0.33254	0.293085
44.922	0.318085	0.265838	0.2291	0.351506	0.203671	0.55443	0.315255	0.173403	0.257083	0.13304	0.272459	0.330161	0.291489
44.944	0.316489	0.264062	0.227186	0.349699	0.20188	0.552589	0.313385	0.171447	0.254984	0.131278	0.269514	0.327781	0.289362
44.966	0.314894	0.261693	0.224633	0.347892	0.199866	0.550748	0.311515	0.170143	0.252886	0.130396	0.266568	0.325402	0.287766
44.987	0.312766	0.259917	0.222719	0.346084	0.198075	0.548907	0.309645	0.168188	0.250787	0.128634	0.263623	0.323022	0.28617
45.009	0.31117	0.258141	0.220804	0.344578	0.196285	0.547296	0.307775	0.166884	0.248688	0.127753	0.260677	0.320642	0.284043
45.031	0.309574	0.255773	0.21889	0.342771	0.194494	0.545455	0.305904	0.164928	0.24659	0.125991	0.259205	0.318263	0.282447
45.053	0.307447	0.253996	0.216337	0.340964	0.192704	0.543613	0.304034	0.163625	0.244491	0.124229	0.256259	0.315883	0.280851
45.074	0.305851	0.25222	0.214422	0.339458	0.190913	0.541772	0.302164	0.162321	0.242392	0.123348	0.253314	0.313504	0.278723
45.096	0.304255	0.249852	0.212508	0.337651	0.189123	0.539931	0.300294	0.160365	0.240294	0.121586	0.250368	0.311124	0.277128
45.118	0.302128	0.248076	0.210593	0.335843	0.187332	0.53809	0.298424	0.159061	0.238195	0.120705	0.247423	0.308745	0.275
45.14	0.300532	0.2463	0.208679	0.334337	0.185542	0.536249	0.296554	0.157106	0.236097	0.118943	0.244477	0.306365	0.273404
45.161	0.298404	0.244523	0.206126	0.33253	0.183751	0.534407	0.294683	0.155802	0.234523	0.118062	0.243004	0.303986	0.271809
45.183	0.296809	0.242155	0.204212	0.330723	0.181961	0.532566	0.292813	0.154498	0.232424	0.1163	0.240059	0.301606	0.269681
45.205	0.295213	0.240379	0.202297	0.328916	0.179946	0.530725	0.290943	0.152542	0.230325	0.115419	0.237113	0.299227	0.268085
45.227	0.293085	0.238603	0.200383	0.32741	0.178156	0.528884	0.289073	0.151239	0.228227	0.113656	0.234168	0.296847	0.265957
45.248	0.291489	0.236234	0.198468	0.325602	0.176365	0.526812	0.287203	0.149283	0.226128	0.112775	0.231222	0.294468	0.264362
45.27	0.289362	0.234458	0.196554	0.323795	0.174575	0.524971	0.285333	0.147979	0.224029	0.111013	0.22975	0.292088	0.262766
45.292	0.287766	0.232682	0.194001	0.322289	0.172784	0.52313	0.283462	0.146675	0.221931	0.110132	0.226804	0.289709	0.260638
45.314	0.28617	0.230906	0.192087	0.320482	0.170994	0.521289	0.281592	0.14472	0.219832	0.10837	0.223859	0.287329	0.259043
45.335	0.284043	0.228538	0.190172	0.318675	0.169203	0.519217	0.279722	0.143416	0.218258	0.107489	0.220913	0.284949	0.256915
45.357	0.282447	0.226761	0.188258	0.316867	0.167413	0.517376	0.277852	0.142112	0.216159	0.105727	0.21944	0.28257	0.255319
45.379	0.280851	0.224985	0.186343	0.315361	0.165622	0.515535	0.275982	0.140156	0.214061	0.104846	0.216495	0.28019	0.253723
45.401	0.278723	0.223209	0.184429	0.313554	0.163832	0.513464	0.274112	0.138853	0.211962	0.103084	0.213549	0.277811	0.251596
45.422	0.277128	0.221433	0.182514	0.311747	0.162041	0.511623	0.272242	0.137549	0.209864	0.102203	0.210604	0.275431	0.25
45.444	0.275	0.219065	0.1806	0.310241	0.160251	0.509551	0.270371	0.136245	0.207765	0.100441	0.209131	0.273052	0.247872
45.466	0.273404	0.217288	0.178685	0.308434	0.15846	0.50771	0.268501	0.134289	0.206191	0.0995595	0.206186	0.270077	0.246277
45.487	0.271809	0.215512	0.176771	0.306627	0.15667	0.505639	0.266631	0.132986	0.204092	0.0977974	0.20324	0.267698	0.244681
45.509	0.269681	0.213736	0.174856	0.304819	0.154879	0.503797	0.264761	0.131682	0.201994	0.0969163	0.200295	0.265318	0.242553
45.531	0.268085	0.21196	0.172942	0.303313	0.153089	0.501726	0.262891	0.130378	0.199895	0.0960352	0.198822	0.262939	0.240957
45.553	0.265957	0.209591	0.171027	0.301506	0.151298	0.499885	0.261021	0.128422	0.197796	0.0942731	0.195876	0.260559	0.23883
45.574	0.264362	0.207815	0.169113	0.299699	0.149508	0.497814	0.25915	0.127119	0.196222	0.0933921	0.192931	0.25818	0.237234
45.596	0.262766	0.206039	0.167198	0.298193	0.147941	0.495972	0.25728	0.125815	0.194124	0.09163	0.191458	0.2558	0.235638
45.618	0.260638	0.204263	0.165284	0.296386	0.14615	0.493901	0.25541	0.124511	0.192025	0.0907489	0.188513	0.253421	0.233511
45.64	0.259043	0.202487	0.163369	0.294578	0.14436	0.49183	0.25354	0.123207	0.189927	0.0898678	0.185567	0.251041	0.231915
45.661	0.256915	0.20071	0.161455	0.292771	0.142569	0.489988	0.25167	0.121904	0.188353	0.0881057	0.182622	0.248662	0.230319
45.683	0.255319	0.198934	0.159541	0.291265	0.140779	0.487917	0.2498	0.119948	0.186254	0.0872247	0.181149	0.246282	0.228191
45.705	0.253723	0.196566	0.157626	0.289458	0.139212	0.485846	0.247929	0.118644	0.184155	0.0863436	0.178203	0.243902	0.226596
45.727	0.251596	0.19479	0.155712	0.287651	0.137422	0.484005	0.246059	0.11734	0.182057	0.0845815	0.175258	0.241523	0.225
45.748	0.25	0.193014	0.154435	0.286145	0.135631	0.481933	0.244189	0.116037	0.180483	0.0837004	0.173785	0.239143	0.222872
45.77	0.247872	0.191237	0.152521	0.284337	0.134064	0.479862	0.242319	0.114733	0.178384	0.0828194	0.170839	0.236764	0.221277
45.792	0.246277	0.189461	0.150606	0.28253	0.132274	0.477791	0.240449	0.113429	0.176285	0.0810573	0.167894	0.234384	0.219681
45.814	0.244681	0.187685	0.148692	0.280723	0.130483	0.475949	0.238579	0.112125	0.174711	0.0801762	0.166421	0.232005	0.217553
45.835	0.242553	0.185909	0.146777	0.279217	0.128917	0.473878	0.236709	0.110821	0.172613	0.0792952	0.163476	0.229625	0.215957
45.857	0.240957	0.184133	0.144863	0.27741	0.127126	0.471807	0.234838	0.109518	0.170514	0.0784141	0.16053	0.227841	0.214362
45.879	0.23883	0.182356	0.143586	0.275602	0.12556	0.469965	0.232968	0.108214	0.16894	0.076652	0.159057	0.225461	0.212234
45.901	0.237234	0.18058	0.141672	0.274096	0.123769	0.467894	0.231365	0.10691	0.166842	0.0757709	0.156112	0.223081	0.210638
45.922	0.235638	0.178804	0.139757	0.272289	0.122202	0.465823	0.229495	0.105606	0.165268	0.0748899	0.153166	0.220702	0.209043
45.944	0.233511	0.177028	0.138481	0.270482	0.120412	0.463982	0.227625	0.104302	0.163169	0.0740088	0.151694	0.218322	0.206915
45.966	0.231915	0.175252	0.136567	0.268976	0.118845	0.46191	0.225755	0.102999	0.16107	0.0722467	0.148748	0.215943	0.205319
45.988	0.230319	0.173475	0.134652	0.267169	0.117055	0.459839	0.223885	0.101695	0.159496	0.0713656	0.145803	0.213563	0.203723
46.009	0.228191	0.171699	0.132738	0.265361	0.115488	0.457998	0.222282	0.100391	0.157398	0.0704846	0.14433	0.211184	0.202128
46.031	0.226596	0.169923	0.131461	0.263855	0.113921	0.455926	0.220411	0.0990874	0.155824	0.0696035	0.141384	0.208804	0.2
46.053	0.225	0.168147	0.129547	0.262048	0.112131	0.453855	0.218541	0.0977836	0.153725	0.0687225	0.138439	0.206425	0.198404
46.075	0.222872	0.166371	0.128271	0.260241	0.110564	0.452014	0.216671	0.0964798	0.152151	0.0669604	0.136966	0.204045	0.196809
46.096	0.221277	0.164594	0.126356	0.258735	0.108997	0.449942	0.215068	0.095176	0.150052	0.0660793	0.134021	0.201666	0.195213
46.118	0.219681	0.162818	0.124442	0.256928	0.107431	0.448101	0.213198	0.0938722	0.148478	0.0651982	0.131075	0.199881	0.193085
46.14	0.217553	0.161042	0.123165	0.25512	0.105864	0.44603	0.211328	0.0925684	0.14638	0.0643172	0.129602	0.197501	0.191489
46.162	0.215957	0.159266	0.121251	0.253614	0.104297	0.444189	0.209725	0.0912647	0.144806	0.0634361	0.126657	0.195122	0.189894
46.183	0.214362	0.15749	0.119974	0.251807	0.102507	0.442348	0.207855	0.0899609	0.142707	0.0625551	0.125184	0.192742	0.188298
46.205	0.212234	0.155713	0.11806	0.25	0.10094	0.440276	0.205985	0.089309	0.141133	0.060793	0.122239	0.190363	0.18617
46.227	0.210638	0.153937	0.116784	0.248494	0.0993733	0.438435	0.204382	0.0880052	0.139559	0.0599119	0.119293	0.188578	0.184574
46.249	0.209043	0.152161	0.114869	0.246687	0.0978066	0.436594	0.202511	0.0867014	0.137461	0.0590308	0.11782	0.186199	0.182979
46.27	0.206915	0.150385	0.113593	0.245181	0.0964637	0.434522	0.200908	0.0853977	0.135887	0.0581498	0.114875	0.183819	0.181383
46.292	0.205319	0.148609	0.111678	0.243373	0.094897	0.432681	0.199038	0.0840939	0.133788	0.0572687	0.113402	0.18144	0.179787
46.314	0.203723	0.146832	0.110402	0.241566	0.0933303	0.43084	0.197435	0.083442	0.132214	0.0563877	0.110457	0.17906	0.178191
46.336	0.202128	0.145056	0.108488	0.24006	0.0917637	0.428999	0.195565	0.0821382	0.13064	0.0555066	0.108984	0.177275	0.176064
46.357	0.2	0.143872	0.107211	0.238253	0.090197	0.427158	0.193962	0.0808344	0.129066	0.0546256	0.106038	0.174896	0.174468
46.379	0.198404	0.142096	0.105935	0.236747	0.0888541	0.425316	0.192092	0.0795306	0.126967	0.0537445	0.104566	0.172516	0.172872
46.401	0.196809	0.14032	0.10402	0.23494	0.0872874	0.423475	0.190489	0.0788787	0.125393	0.0528634	0.10162	0.170732	0.171277
46.423	0.195213	0.138544	0.102744	0.233434	0.0857207	0.421634	0.188886	0.077575	0.12382	0.0519824	0.100147	0.168352	0.169681
46.444	0.193085	0.136767	0.101468	0.231627	0.0843778	0.419793	0.187016	0.0762712	0.122246	0.0511013	0.0972018	0.165973	0.168085
46.466	0.191489	0.134991	0.0995533	0.23012	0.0828111	0.417952	0.185413	0.0749674	0.120147	0.0502203	0.095729	0.164188	0.166489
46.488	0.189894	0.133807	0.098277	0.228313	0.0814682	0.41611	0.18381	0.0743155	0.118573	0.0493392	0.0927835	0.161808	0.164894
46.51	0.188298	0.132031	0.0970006	0.226807	0.0799015	0.414499	0.18194	0.0730117	0.116999	0.0484581	0.0913108	0.159429	0.163298
46.531	0.18617	0.130255	0.0950862	0.225	0.0785586	0.412658	0.180337	0.071708	0.115425	0.0475771	0.0883652	0.157644	0.161702
46.553	0.184574	0.128478	0.0938098	0.223494	0.0772158	0.410817	0.178734	0.0710561	0.113851	0.046696	0.0868925	0.155265	0.159574
46.575	0.182979	0.126702	0.0925335	0.221687	0.0756491	0.409206	0.177131	0.0697523	0.112277	0.045815	0.083947	0.15348	0.157979
46.597	0.181383	0.125518	0.0912572	0.220181	0.0743062	0.407365	0.175528	0.0684485	0.110178	0.0449339	0.0824742	0.151101	0.156383
46.618	0.179787	0.123742	0.0899809	0.218373	0.0729633	0.405754	0.173925	0.0677966	0.108604	0.0440529	0.0795287	0.149316	0.154787
46.64	0.178191	0.121966	0.0880664	0.216867	0.0716204	0.404143	0.172322	0.0664928	0.10703	0.0431718	0.078056	0.146936	0.153191
46.662	0.176064	0.120782	0.08679	0.21506	0.0702775	0.402301	0.170719	0.0658409	0.105456	0.0422907	0.0765832	0.145152	0.151596
46.684	0.174468	0.119005	0.0855137	0.213554	0.0689346	0.40069	0.169116	0.0645372	0.103882	0.0414097	0.0736377	0.142772	0.15
46.705	0.172872	0.117229	0.0842374	0.212048	0.0675918	0.399079	0.167513	0.0638853	0.102308	0.0405286	0.0721649	0.140988	0.148404
46.727	0.171277	0.115453	0.0829611	0.210241	0.0662489	0.397468	0.16591	0.0625815	0.100735	0.0396476	0.0706922	0.139203	0.146809
46.749	0.169681	0.114269	0.0816847	0.208735	0.064906	0.395627	0.164307	0.0612777	0.0991605	0.0387665	0.0677467	0.136823	0.145213
46.771	0.168085	0.112493	0.0804084	0.207229	0.0635631	0.394016	0.162704	0.0606258	0.0975866	0.0378855	0.0662739	0.135039	0.144149
46.792	0.166489	0.111308	0.0791321	0.205422	0.0622202	0.392405	0.161101	0.059322	0.0965373	0.0370044	0.0648012	0.132659	0.142553
46.814	0.164894	0.109532	0.0778558	0.203916	0.0611012	0.390794	0.159498	0.0586701	0.0949633	0.0361233	0.0618557	0.130874	0.140957
46.836	0.163298	0.107756	0.0765795	0.20241	0.0597583	0.389183	0.158162	0.0573664	0.0933893	0.0361233	0.0603829	0.12909	0.139362
46.858	0.161702	0.106572	0.0753031	0.200904	0.0584154	0.387802	0.156559	0.0567145	0.0918153	0.0352423	0.0589102	0.12671	0.137766
46.879	0.159574	0.104796	0.0740268	0.199096	0.0572963	0.386191	0.154956	0.0554107	0.0902413	0.0343612	0.0559647	0.124926	0.13617
46.901	0.157979	0.103612	0.0727505	0.19759	0.0559534	0.38458	0.15362	0.0547588	0.0886674	0.0334802	0.0544919	0.123141	0.134574
46.923	0.156383	0.101835	0.0714742	0.196084	0.0548344	0.382969	0.152017	0.0541069	0.087618	0.0325991	0.0530191	0.121356	0.132979
46.945	0.154787	0.100059	0.0701978	0.194578	0.0537153	0.381588	0.150681	0.0528031	0.0860441	0.0317181	0.0515464	0.119572	0.131383
46.966	0.153191	0.0988751	0.0689215	0.193072	0.0523724	0.379977	0.149078	0.0521512	0.0844701	0.0317181	0.0500736	0.117192	0.129787
46.988	0.151596	0.0970989	0.0676452	0.191265	0.0512534	0.378366	0.147742	0.0508475	0.0828961	0.030837	0.0471281	0.115407	0.128723
47.01	0.15	0.0959147	0.0663689	0.189759	0.0501343	0.376985	0.146139	0.0501956	0.0818468	0.0299559	0.0456554	0.113623	0.127128
47.032	0.148404	0.0941385	0.0650925	0.188253	0.0490152	0.375374	0.144804	0.0495437	0.0802728	0.0290749	0.0441826	0.111838	0.125532
47.053	0.146809	0.0929544	0.0638162	0.186747	0.0478962	0.373993	0.143201	0.0482399	0.0786988	0.0281938	0.0427099	0.110054	0.123936
47.075	0.145213	0.0917703	0.063178	0.185241	0.0467771	0.372612	0.141865	0.047588	0.0776495	0.0281938	0.0412371	0.108269	0.12234
47.097	0.144149	0.0899941	0.0619017	0.183735	0.045658	0.371001	0.140529	0.0462842	0.0760756	0.0273128	0.0397644	0.106484	0.121277
47.119	0.142553	0.0888099	0.0606254	0.182229	0.0445389	0.36962	0.138926	0.0456323	0.0750262	0.0264317	0.0382916	0.1047	0.119681
47.14	0.140957	0.0870337	0.0593491	0.180723	0.0434199	0.368239	0.13759	0.0449804	0.0734523	0.0255507	0.0368189	0.102915	0.118085
47.162	0.139362	0.0858496	0.0580728	0.179217	0.0423008	0.366628	0.136254	0.0443286	0.0724029	0.0255507	0.0353461	0.10113	0.116489
47.184	0.137766	0.0840734	0.0574346	0.177711	0.0414056	0.365247	0.134919	0.0430248	0.070829	0.0246696	0.0338733	0.0993456	0.115426
47.206	0.13617	0.0828893	0.0561583	0.176205	0.0402865	0.363867	0.133583	0.0423729	0.0697796	0.0237885	0.0324006	0.097561	0.11383
47.227	0.134574	0.0817052	0.0548819	0.174699	0.0393912	0.362486	0.132247	0.041721	0.0682057	0.0229075	0.0309278	0.0957763	0.112234
47.249	0.132979	0.079929	0.0542438	0.173193	0.0382722	0.360875	0.130911	0.0404172	0.0671563	0.0229075	0.0294551	0.0939917	0.11117
47.271	0.131383	0.0787448	0.0529675	0.171988	0.0373769	0.359494	0.129575	0.0397653	0.0655824	0.0220264	0.0279823	0.092207	0.109574
47.292	0.129787	0.0775607	0.0516911	0.170482	0.0362578	0.358113	0.128239	0.0391134	0.0645331	0.0211454	0.0265096	0.0904224	0.107979
47.314	0.128723	0.0763766	0.051053	0.168976	0.0353626	0.356732	0.126904	0.0384615	0.0634837	0.0211454	0.0250368	0.0892326	0.106915
47.336	0.127128	0.0746004	0.0497766	0.16747	0.0344673	0.355351	0.125568	0.0378096	0.0619098	0.0202643	0.0235641	0.0874479	0.105319
47.358	0.125532	0.0734162	0.0485003	0.165964	0.0335721	0.35397	0.124232	0.0365059	0.0608604	0.0193833	0.0220913	0.0856633	0.103723
47.379	0.123936	0.0722321	0.0478622	0.164759	0.0326768	0.352589	0.122896	0.035854	0.0598111	0.0193833	0.0206186	0.0838786	0.10266
47.401	0.12234	0.071048	0.0465858	0.163253	0.0317816	0.351208	0.121827	0.0352021	0.0582371	0.0185022	0.0206186	0.0826889	0.101064
47.423	0.121277	0.0692718	0.0459477	0.161747	0.0308863	0.349827	0.120492	0.0345502	0.0571878	0.0176211	0.0191458	0.0809042	0.1
47.445	0.119681	0.0680876	0.0446713	0.160542	0.029991	0.348446	0.119156	0.0338983	0.0561385	0.0176211	0.017673	0.0791196	0.0984043
47.466	0.118085	0.0669035	0.043395	0.159036	0.0290958	0.347066	0.118087	0.0332464	0.0550892	0.0167401	0.0162003	0.0779298	0.0968085
47.488	0.116489	0.0657194	0.0427569	0.15753	0.0282005	0.345685	0.116751	0.0319426	0.0535152	0.0167401	0.0147275	0.0761452	0.0957447
47.51	0.115426	0.0645352	0.0414805	0.156325	0.0275291	0.344304	0.115683	0.0312907	0.0524659	0.015859	0.0147275	0.0749554	0.0941489
47.532	0.11383	0.0633511	0.0408424	0.154819	0.0266338	0.342923	0.114347	0.0306389	0.0514166	0.014978	0.0132548	0.0731707	0.0930851
47.553	0.112234	0.062167	0.039566	0.153614	0.0259624	0.341772	0.113278	0.029987	0.0503673	0.014978	0.011782	0.071981	0.0914894
47.575	0.11117	0.0609828	0.0389279	0.152108	0.0250671	0.340391	0.111942	0.0293351	0.0493179	0.0140969	0.011782	0.0701963	0.0904255
47.597	0.109574	0.0597987	0.0382897	0.150904	0.0243957	0.33901	0.110874	0.0286832	0.0482686	0.0140969	0.0103093	0.0690065	0.0888298
47.619	0.107979	0.0586146	0.0370134	0.149398	0.0237243	0.337629	0.109538	0.0280313	0.0472193	0.0132159	0.0103093	0.0672219	0.087766
47.64	0.106915	0.0574304	0.0363752	0.148193	0.022829	0.336249	0.108469	0.0273794	0.04617	0.0132159	0.00883652	0.0660321	0.0867021
47.662	0.105319	0.0562463	0.0350989	0.146687	0.0221576	0.334868	0.1074	0.0267275	0.0451207	0.0123348	0.00883652	0.0642475	0.0851064
47.684	0.103723	0.0550622	0.0344608	0.145482	0.0214861	0.333487	0.106332	0.0260756	0.0440714	0.0123348	0.00736377	0.0630577	0.0840426
47.706	0.10266	0.053878	0.0338226	0.144277	0.0208147	0.332106	0.105263	0.0254237	0.043022	0.0114537	0.00736377	0.0618679	0.0824468
47.727	0.101064	0.0526939	0.0325463	0.142771	0.0201432	0.330955	0.103927	0.0247718	0.0419727	0.0114537	0.00589102	0.0600833	0.081383
47.749	0.1	0.0515098	0.0319081	0.141566	0.0194718	0.329574	0.102859	0.0241199	0.0409234	0.0105727	0.00589102	0.0588935	0.0803191
47.771	0.0984043	0.0503256	0.0312699	0.14006	0.0188004	0.328193	0.10179	0.0234681	0.0398741	0.0105727	0.00441826	0.0577037	0.0792553
47.793	0.0968085	0.0491415	0.0299936	0.138855	0.0183527	0.326812	0.100721	0.0228162	0.0393494	0.00969163	0.00441826	0.0559191	0.0776596
47.814	0.0957447	0.0479574	0.0293555	0.137651	0.0176813	0.325432	0.0996527	0.0221643	0.0383001	0.00969163	0.00294551	0.0547293	0.0765957
47.836	0.0941489	0.0467732	0.0287173	0.136446	0.0172337	0.324051	0.098584	0.0215124	0.0372508	0.00881057	0.00294551	0.0535396	0.0755319
47.858	0.0930851	0.0461812	0.0280791	0.13494	0.0165622	0.3229	0.0975154	0.0208605	0.0362015	0.00881057	0.00294551	0.0523498	0.0739362
47.88	0.0914894	0.044997	0.0268028	0.133735	0.0161146	0.321519	0.0967139	0.0202086	0.0351522	0.00792952	0.00294551	0.05116	0.0728723
47.901	0.0904255	0.0438129	0.0261646	0.13253	0.0154432	0.320138	0.0956452	0.0202086	0.0346275	0.00792952	0.00147275	0.0499703	0.0718085
47.923	0.0888298	0.0426288	0.0255265	0.131325	0.0149955	0.318757	0.0945765	0.0195567	0.0335782	0.00792952	0.00147275	0.0487805	0.0707447
47.945	0.087766	0.0420367	0.0248883	0.13012	0.0145479	0.317376	0.0935079	0.0189048	0.0325289	0.00704846	0.00147275	0.0475907	0.0696809
47.967	0.0867021	0.0408526	0.0242502	0.128916	0.0138765	0.316226	0.0927064	0.0182529	0.0320042	0.00704846	0.00147275	0.0458061	0.068617
47.988	0.0851064	0.0396684	0.023612	0.12741	0.0134288	0.314845	0.0916377	0.017601	0.0309549	0.0061674	0.00147275	0.0446163	0.0670213
48.01	0.0840426	0.0390764	0.0223357	0.126205	0.0129812	0.313464	0.0905691	0.0169492	0.0299056	0.0061674	0	0.0440214	0.0659574
48.032	0.0824468	0.0378922	0.0216975	0.125	0.0125336	0.312083	0.0897676	0.0169492	0.0293809	0.0061674	0	0.0428316	0.0648936
48.054	0.081383	0.0367081	0.0210593	0.123795	0.0120859	0.310702	0.0886989	0.0162973	0.0283316	0.00528634	0	0.0416419	0.0638298
48.075	0.0803191	0.036116	0.0204212	0.12259	0.0116383	0.309321	0.0878974	0.0156454	0.0278069	0.00528634	0	0.0404521	0.062766
48.097	0.0792553	0.0349319	0.019783	0.121386	0.0111907	0.30817	0.0868287	0.0149935	0.0267576	0.00528634	0	0.0392623	0.0617021
48.119	0.0776596	0.0343398	0.0191449	0.120181	0.0107431	0.306789	0.0860273	0.0143416	0.0262329	0.00440529	0	0.0380726	0.0606383
48.141	0.0765957	0.0331557	0.0185067	0.118976	0.0105192	0.305409	0.0852258	0.0143416	0.0251836	0.00440529	0	0.0368828	0.0595745
48.162	0.0755319	0.0325636	0.0178685	0.117771	0.0100716	0.304028	0.0841571	0.0136897	0.024659	0.00440529	0	0.035693	0.0585106
48.184	0.0739362	0.0313795	0.0172304	0.116566	0.00962399	0.302647	0.0833556	0.0130378	0.0236097	0.00352423	0	0.0350982	0.0574468
48.206	0.0728723	0.0307874	0.0165922	0.115361	0.00940018	0.301496	0.0825541	0.0130378	0.023085	0.00352423	0	0.0339084	0.056383
48.228	0.0718085	0.0296033	0.0159541	0.114458	0.00895255	0.300115	0.0817526	0.0123859	0.0225603	0.00352423	0	0.0327186	0.0553191
48.249	0.0707447	0.0290112	0.0153159	0.113253	0.00850492	0.298734	0.0809511	0.011734	0.021511	0.00352423	0.00147275	0.0315289	0.0542553
48.271	0.0696809	0.0278271	0.0146777	0.112048	0.00828111	0.297353	0.0801496	0.011734	0.0209864	0.00264317	0.00147275	0.030934	0.0537234
48.293	0.068617	0.0272351	0.0146777	0.110843	0.00783348	0.296203	0.0793481	0.0110821	0.0204617	0.00264317	0.00147275	0.0297442	0.0526596
48.315	0.0670213	0.0260509	0.0140396	0.109639	0.00760967	0.294822	0.0785466	0.0104302	0.0194124	0.00264317	0.00147275	0.0291493	0.0515957
48.336	0.0659574	0.0254589	0.0134014	0.108434	0.00738585	0.293441	0.0777451	0.0104302	0.0188877	0.00264317	0.00147275	0.0279595	0.0505319
48.358	0.0648936	0.0248668	0.0127632	0.10753	0.00693823	0.29206	0.0769436	0.00977836	0.0183631	0.00176211	0.00294551	0.0267698	0.0494681
48.38	0.0638298	0.0236827	0.0121251	0.106325	0.00671441	0.290909	0.0761421	0.00912647	0.0178384	0.00176211	0.00294551	0.0261749	0.0489362
48.402	0.062766	0.0230906	0.0114869	0.10512	0.0064906	0.289528	0.0753406	0.00912647	0.0173137	0.00176211	0.00294551	0.0249851	0.0478723
48.423	0.0617021	0.0224985	0.0114869	0.103916	0.00604297	0.288147	0.0745391	0.00847458	0.0162644	0.00176211	0.00294551	0.0243902	0.0468085
48.445	0.0606383	0.0219065	0.0108488	0.103012	0.00581916	0.286997	0.0740048	0.00847458	0.0157398	0.00176211	0.00441826	0.0232005	0.0457447
48.467	0.0595745	0.0207223	0.0102106	0.101807	0.00559534	0.285616	0.0732033	0.00782269	0.0152151	0.00176211	0.00441826	0.0226056	0.0452128
48.489	0.0585106	0.0201303	0.00957243	0.100602	0.00537153	0.284465	0.0724018	0.00782269	0.0146905	0.000881057	0.00589102	0.0220107	0.0441489
48.51	0.0574468	0.0195382	0.00957243	0.0996988	0.00514772	0.283084	0.0718675	0.0071708	0.0141658	0.000881057	0.00589102	0.0208209	0.0430851
48.532	0.056383	0.0189461	0.00893427	0.098494	0.0049239	0.281933	0.071066	0.0065189	0.0136411	0.000881057	0.00589102	0.0202261	0.0425532
48.554	0.0553191	0.0183541	0.00829611	0.0972892	0.00470009	0.280552	0.0705317	0.0065189	0.0131165	0.000881057	0.00736377	0.0196312	0.0414894
48.576	0.0542553	0.017762	0.00829611	0.0963855	0.00447628	0.279402	0.0697302	0.00586701	0.0125918	0.000881057	0.00736377	0.0184414	0.0404255
48.597	0.0537234	0.0165779	0.00765795	0.0951807	0.00425246	0.278021	0.0691958	0.00586701	0.0120672	0.000881057	0.00883652	0.0178465	0.0398936
48.619	0.0526596	0.0159858	0.00701978	0.0942771	0.00402865	0.27687	0.0686615	0.00586701	0.0115425	0.000881057	0.00883652	0.0172516	0.0388298
48.641	0.0515957	0.0153937	0.00701978	0.0930723	0.00380483	0.275489	0.06786	0.00521512	0.0110178	0.000881057	0.0103093	0.0160619	0.0382979
48.663	0.0505319	0.0148017	0.00638162	0.0918675	0.00358102	0.274338	0.0673257	0.00521512	0.0104932	0	0.0103093	0.015467	0.037234
48.684	0.0494681	0.0142096	0.00638162	0.0909639	0.00335721	0.272957	0.0667913	0.00456323	0.00996852	0	0.011782	0.0148721	0.0367021
48.706	0.0489362	0.0136175	0.00574346	0.089759	0.00313339	0.271807	0.066257	0.00456323	0.00944386	0	0.0132548	0.0142772	0.0356383
48.728	0.0478723	0.0130255	0.00574346	0.0888554	0.00290958	0.270656	0.0657227	0.00391134	0.0089192	0	0.0132548	0.0136823	0.0351064
48.75	0.0468085	0.0124334	0.0051053	0.0879518	0.00290958	0.269505	0.0651884	0.00391134	0.0089192	0	0.0147275	0.0130874	0.0340426
48.771	0.0457447	0.0118413	0.0051053	0.086747	0.00268577	0.268124	0.064654	0.00391134	0.00839454	0	0.0147275	0.0124926	0.0335106
48.793	0.0452128	0.0112493	0.00446713	0.0858434	0.00246195	0.266974	0.0641197	0.00325945	0.00786988	0	0.0162003	0.0118977	0.0324468
48.815	0.0441489	0.0112493	0.00446713	0.0846386	0.00223814	0.265823	0.0635854	0.00325945	0.00734523	0	0.017673	0.0113028	0.0319149
48.837	0.0430851	0.0106572	0.00382897	0.0837349	0.00223814	0.264672	0.063051	0.00260756	0.00682057	0	0.017673	0.0107079	0.0308511
48.858	0.0425532	0.0100651	0.00382897	0.0828313	0.00201432	0.263291	0.0625167	0.00260756	0.00682057	0	0.0191458	0.010113	0.0303191
48.88	0.0414894	0.00947306	0.00319081	0.0816265	0.00201432	0.26214	0.0619824	0.00260756	0.00629591	0	0.0206186	0.00951814	0.0297872
48.902	0.0404255	0.00888099	0.00319081	0.0807229	0.00179051	0.26099	0.061448	0.00260756	0.00577125	0	0.0220913	0.00892326	0.0287234
48.924	0.0398936	0.00828893	0.00319081	0.0798193	0.0015667	0.259839	0.0611809	0.00195567	0.00577125	0	0.0220913	0.00832838	0.0281915
48.945	0.0388298	0.00828893	0.00255265	0.0786145	0.0015667	0.258688	0.0606465	0.00195567	0.00524659	0	0.0235641	0.00773349	0.0276596
48.967	0.0382979	0.00769686	0.00255265	0.0777108	0.00134288	0.257537	0.0601122	0.00195567	0.00472193	0	0.0250368	0.00713861	0.0265957
48.989	0.037234	0.0071048	0.00191449	0.0768072	0.00134288	0.256387	0.059845	0.00130378	0.00472193	0	0.0265096	0.00713861	0.0260638
49.011	0.0367021	0.00651273	0.00191449	0.0759036	0.00111907	0.255236	0.0593107	0.00130378	0.00419727	0	0.0279823	0.00654372	0.0255319
49.032	0.0356383	0.00651273	0.00191449	0.075	0.00111907	0.253855	0.0587764	0.00130378	0.00419727	0	0.0279823	0.00594884	0.0244681
49.054	0.0351064	0.00592066	0.00191449	0.0737952	0.000895255	0.252704	0.0585092	0.00130378	0.00367261	0.000881057	0.0294551	0.00535396	0.0239362
49.076	0.0340426	0.0053286	0.00127632	0.0728916	0.000895255	0.251554	0.0579749	0.00130378	0.00314795	0.000881057	0.0309278	0.00535396	0.0234043
49.097	0.0335106	0.0053286	0.00127632	0.071988	0.000671441	0.250403	0.0577077	0.00065189	0.00314795	0.000881057	0.0324006	0.00475907	0.0228723
49.119	0.0324468	0.00473653	0.00127632	0.0710843	0.000671441	0.249252	0.0574406	0.00065189	0.00262329	0.000881057	0.0338733	0.00416419	0.0223404
49.141	0.0319149	0.00473653	0.00127632	0.0701807	0.000671441	0.248101	0.0569062	0.00065189	0.00262329	0.000881057	0.0338733	0.00416419	0.0212766
49.163	0.0308511	0.00414446	0.000638162	0.0692771	0.000447628	0.246951	0.0566391	0.00065189	0.00262329	0.000881057	0.0353461	0.0035693	0.0207447
49.184	0.0303191	0.0035524	0.000638162	0.0683735	0.000447628	0.2458	0.0563719	0.00065189	0.00209864	0.000881057	0.0368189	0.0035693	0.0202128
49.206	0.0297872	0.0035524	0.000638162	0.0674699	0.000447628	0.244649	0.0558376	0.00065189	0.00209864	0.000881057	0.0382916	0.00297442	0.0196809
49.228	0.0287234	0.00296033	0.000638162	0.0665663	0.000447628	0.243268	0.0555704	0	0.00157398	0.00176211	0.0397644	0.00297442	0.0191489
49.25	0.0281915	0.00296033	0.000638162	0.0656627	0.000223814	0.242117	0.0553032	0	0.00157398	0.00176211	0.0412371	0.00237954	0.018617
49.271	0.0276596	0.00296033	0.000638162	0.064759	0.000223814	0.240967	0.0550361	0	0.00157398	0.00176211	0.0427099	0.00237954	0.0180851
49.293	0.0265957	0.00236827	0.000638162	0.0638554	0.000223814	0.239816	0.0545017	0	0.00104932	0.00176211	0.0427099	0.00178465	0.0175532
49.315	0.0260638	0.00236827	0.000638162	0.0629518	0.000223814	0.238665	0.0542346	0	0.00104932	0.00176211	0.0441826	0.00178465	0.0170213
49.337	0.0255319	0.0017762	0	0.0620482	0.000223814	0.237284	0.0539674	0	0.00104932	0.00264317	0.0456554	0.00118977	0.0164894
49.358	0.0244681	0.0017762	0	0.0611446	0.000223814	0.236133	0.0537002	0	0.000524659	0.00264317	0.0471281	0.00118977	0.0159574
49.38	0.0239362	0.0017762	0	0.0605422	0	0.234983	0.0534331	0	0.000524659	0.00264317	0.0486009	0.00118977	0.0154255
49.402	0.0234043	0.00118413	0	0.0596386	0	0.233602	0.0531659	0	0.000524659	0.00264317	0.0500736	0.00118977	0.0148936
49.424	0.0228723	0.00118413	0	0.0587349	0	0.232451	0.0528987	0	0.000524659	0.00264317	0.0515464	0.000594884	0.0143617
49.445	0.0223404	0.00118413	0	0.0578313	0	0.23107	0.0526316	0	0.000524659	0.00352423	0.0530191	0.000594884	0.0138298
49.467	0.0212766	0.000592066	0	0.0569277	0	0.229919	0.0523644	0	0	0.00352423	0.0530191	0.000594884	0.0132979
49.489	0.0207447	0.000592066	0	0.0563253	0	0.228539	0.0520972	0	0	0.00352423	0.0544919	0.000594884	0.012766
49.511	0.0202128	0.000592066	0	0.0554217	0.000223814	0.227388	0.0518301	0	0	0.00352423	0.0559647	0.000594884	0.012234
49.532	0.0196809	0.000592066	0.000638162	0.0545181	0.000223814	0.226007	0.0515629	0.00065189	0	0.00440529	0.0574374	0	0.0117021
49.554	0.0191489	0.000592066	0.000638162	0.0539157	0.000223814	0.224626	0.0512958	0.00065189	0	0.00440529	0.0589102	0	0.0111702
49.576	0.018617	0	0.000638162	0.053012	0.000223814	0.223245	0.0510286	0.00065189	0	0.00440529	0.0589102	0	0.0106383
49.598	0.0180851	0	0.000638162	0.0521084	0.000223814	0.221864	0.0507614	0.00065189	0	0.00528634	0.0603829	0	0.0101064
49.619	0.0175532	0	0.000638162	0.051506	0.000223814	0.220713	0.0504943	0.00065189	0	0.00528634	0.0618557	0	0.0101064
49.641	0.0170213	0	0.000638162	0.0506024	0.000223814	0.219333	0.0502271	0.00065189	0	0.00528634	0.0633284	0	0.00957447
49.663	0.0164894	0	0.000638162	0.05	0.000447628	0.217722	0.0499599	0.00130378	0	0.0061674	0.0648012	0	0.00904255
49.685	0.0159574	0	0.000638162	0.0490964	0.000447628	0.216341	0.0499599	0.00130378	0	0.0061674	0.0648012	0	0.00851064
49.706	0.0154255	0	0.00127632	0.048494	0.000447628	0.21496	0.0496928	0.00130378	0	0.0061674	0.0662739	0	0.00851064
49.728	0.0148936	0	0.00127632	0.0475904	0.000671441	0.213579	0.0494256	0.00130378	0	0.00704846	0.0677467	0	0.00797872
49.75	0.0143617	0	0.00127632	0.046988	0.000671441	0.212198	0.0491584	0.00195567	0	0.00704846	0.0677467	0.000594884	0.00744681
49.772	0.0138298	0	0.00127632	0.0460843	0.000671441	0.210587	0.0488913	0.00195567	0	0.00704846	0.0692194	0.000594884	0.00691489
49.793	0.0132979	0	0.00127632	0.0454819	0.000895255	0.209206	0.0486241	0.00195567	0	0.00792952	0.0706922	0.000594884	0.00691489
49.815	0.012766	0	0.00191449	0.0445783	0.000895255	0.207595	0.0486241	0.00195567	0	0.00792952	0.0706922	0.000594884	0.00638298
49.837	0.012234	0	0.00191449	0.0439759	0.000895255	0.205984	0.0483569	0.00260756	0.000524659	0.00881057	0.0721649	0.000594884	0.00638298
49.859	0.0117021	0	0.00191449	0.0433735	0.00111907	0.204603	0.0480898	0.00260756	0.000524659	0.00881057	0.0736377	0.00118977	0.00585106
49.88	0.0111702	0	0.00191449	0.0424699	0.00111907	0.202992	0.0478226	0.00260756	0.000524659	0.00881057	0.0736377	0.00118977	0.00531915
49.902	0.0106383	0	0.00255265	0.0418675	0.00134288	0.201381	0.0475554	0.00325945	0.000524659	0.00969163	0.0751105	0.00118977	0.00531915
49.924	0.0101064	0	0.00255265	0.0412651	0.00134288	0.19977	0.0475554	0.00325945	0.000524659	0.00969163	0.0751105	0.00118977	0.00478723
49.946	0.0101064	0.000592066	0.00255265	0.0403614	0.0015667	0.198159	0.0472883	0.00391134	0.00104932	0.0105727	0.0765832	0.00178465	0.00478723
49.967	0.00957447	0.000592066	0.00319081	0.039759	0.0015667	0.196548	0.0470211	0.00391134	0.00104932	0.0105727	0.0765832	0.00178465	0.00425532
49.989	0.00904255	0.000592066	0.00319081	0.0391566	0.00179051	0.194707	0.0467539	0.00456323	0.00104932	0.0114537	0.078056	0.00237954	0.00425532
50.011	0.00851064	0.000592066	0.00319081	0.038253	0.00179051	0.193096	0.0464868	0.00456323	0.00157398	0.0114537	0.078056	0.00237954	0.0037234
50.033	0.00851064	0.000592066	0.00382897	0.0376506	0.00201432	0.191484	0.0464868	0.00456323	0.00157398	0.0123348	0.078056	0.00237954	0.0037234
50.054	0.00797872	0.00118413	0.00382897	0.0370482	0.00201432	0.189643	0.0462196	0.00521512	0.00157398	0.0123348	0.0795287	0.00297442	0.00319149
50.076	0.00744681	0.00118413	0.00446713	0.0364458	0.00223814	0.188032	0.0459524	0.00521512	0.00209864	0.0132159	0.0795287	0.00297442	0.00319149
50.098	0.00691489	0.00118413	0.00446713	0.0358434	0.00223814	0.186191	0.0456853	0.00586701	0.00209864	0.0132159	0.0795287	0.0035693	0.00265957
50.12	0.00691489	0.00118413	0.0051053	0.035241	0.00246195	0.18435	0.0454181	0.0065189	0.00262329	0.0140969	0.0810015	0.0035693	0.00265957
50.141	0.00638298	0.0017762	0.0051053	0.0343373	0.00268577	0.182509	0.0454181	0.0065189	0.00262329	0.0140969	0.0810015	0.00416419	0.00265957
50.163	0.00638298	0.0017762	0.0051053	0.0337349	0.00268577	0.180898	0.0451509	0.0071708	0.00314795	0.014978	0.0810015	0.00475907	0.00212766
50.185	0.00585106	0.0017762	0.00574346	0.0331325	0.00290958	0.179056	0.0448838	0.0071708	0.00314795	0.014978	0.0810015	0.00475907	0.00212766
50.207	0.00531915	0.00236827	0.00574346	0.0325301	0.00290958	0.176985	0.0446166	0.00782269	0.00367261	0.015859	0.0810015	0.00535396	0.00159574
50.228	0.00531915	0.00236827	0.00638162	0.0319277	0.00313339	0.175144	0.0446166	0.00782269	0.00367261	0.015859	0.0810015	0.00535396	0.00159574
50.25	0.00478723	0.00236827	0.00638162	0.0313253	0.00335721	0.173303	0.0443495	0.00847458	0.00419727	0.0167401	0.0824742	0.00594884	0.00159574
50.272	0.00478723	0.00296033	0.00701978	0.0307229	0.00335721	0.171461	0.0440823	0.00912647	0.00419727	0.0176211	0.0824742	0.00654372	0.00159574
50.294	0.00425532	0.00296033	0.00701978	0.0301205	0.00358102	0.16939	0.0438151	0.00912647	0.00472193	0.0176211	0.0824742	0.00654372	0.00106383
50.315	0.00425532	0.0035524	0.00765795	0.0295181	0.00380483	0.167549	0.043548	0.00977836	0.00472193	0.0185022	0.0824742	0.00713861	0.00106383
50.337	0.0037234	0.0035524	0.00829611	0.0289157	0.00380483	0.165708	0.0432808	0.0104302	0.00524659	0.0185022	0.0824742	0.00773349	0.00106383
50.359	0.0037234	0.00414446	0.00829611	0.0283133	0.00402865	0.163636	0.0432808	0.0110821	0.00577125	0.0193833	0.0810015	0.00832838	0.00106383
50.381	0.00319149	0.00414446	0.00893427	0.0277108	0.00402865	0.161565	0.0430136	0.0110821	0.00577125	0.0202643	0.0810015	0.00892326	0.000531915
50.402	0.00319149	0.00473653	0.00893427	0.0271084	0.00425246	0.159724	0.0427465	0.011734	0.00629591	0.0202643	0.0810015	0.00892326	0.000531915
50.424	0.00265957	0.00473653	0.00957243	0.026506	0.00447628	0.157652	0.0424793	0.0123859	0.00682057	0.0211454	0.0810015	0.00951814	0.000531915
50.446	0.00265957	0.0053286	0.0102106	0.0262048	0.00447628	0.155581	0.0422121	0.0130378	0.00682057	0.0211454	0.0810015	0.010113	0.000531915
50.468	0.00265957	0.0053286	0.0102106	0.0256024	0.00470009	0.15374	0.041945	0.0130378	0.00734523	0.0220264	0.0810015	0.0107079	0.000531915
50.489	0.00212766	0.00592066	0.0108488	0.025	0.0049239	0.151669	0.041945	0.0136897	0.00786988	0.0229075	0.0795287	0.0113028	0.000531915
50.511	0.00212766	0.00592066	0.0114869	0.0243976	0.00514772	0.149597	0.0416778	0.0143416	0.00839454	0.0229075	0.0795287	0.0118977	0.000531915
50.533	0.00159574	0.00651273	0.0121251	0.0237952	0.00514772	0.147526	0.0414106	0.0149935	0.0089192	0.0237885	0.0795287	0.0124926	0.000531915
50.555	0.00159574	0.0071048	0.0121251	0.0231928	0.00537153	0.145455	0.0411435	0.0156454	0.0089192	0.0246696	0.078056	0.0130874	0
50.576	0.00159574	0.0071048	0.0127632	0.0228916	0.00559534	0.143383	0.0408763	0.0162973	0.00944386	0.0255507	0.078056	0.0136823	0
50.598	0.00159574	0.00769686	0.0134014	0.0222892	0.00559534	0.141312	0.0406091	0.0162973	0.00996852	0.0255507	0.078056	0.0142772	0
50.62	0.00106383	0.00769686	0.0140396	0.0216867	0.00581916	0.139241	0.040342	0.0169492	0.0104932	0.0264317	0.0765832	0.0148721	0
50.642	0.00106383	0.00828893	0.0140396	0.0210843	0.00604297	0.137169	0.0400748	0.017601	0.0110178	0.0273128	0.0765832	0.015467	0
50.663	0.00106383	0.00888099	0.0146777	0.0207831	0.00604297	0.135098	0.0398076	0.0182529	0.0115425	0.0273128	0.0751105	0.0160619	0
50.685	0.00106383	0.00888099	0.0153159	0.0201807	0.00626679	0.133026	0.0395405	0.0189048	0.0120672	0.0281938	0.0751105	0.0166568	0
50.707	0.000531915	0.00947306	0.0159541	0.0195783	0.0064906	0.130955	0.0392733	0.0195567	0.0125918	0.0290749	0.0736377	0.0172516	0
50.729	0.000531915	0.0100651	0.0165922	0.0192771	0.0064906	0.128884	0.0390061	0.0202086	0.0131165	0.0299559	0.0736377	0.0178465	0.000531915
50.75	0.000531915	0.0100651	0.0172304	0.0186747	0.00671441	0.126812	0.038739	0.0208605	0.0136411	0.0299559	0.0721649	0.0184414	0.000531915
50.772	0.000531915	0.0106572	0.0178685	0.0180723	0.00693823	0.124741	0.0384718	0.0215124	0.0141658	0.030837	0.0721649	0.0190363	0.000531915
50.794	0.000531915	0.0112493	0.0178685	0.0177711	0.00693823	0.12267	0.0382046	0.0221643	0.0146905	0.0317181	0.0706922	0.0196312	0.000531915
50.816	0.000531915	0.0118413	0.0185067	0.0171687	0.00716204	0.120598	0.0379375	0.0228162	0.0152151	0.0325991	0.0706922	0.0208209	0.000531915
50.837	0.000531915	0.0118413	0.0191449	0.0168675	0.00738585	0.118527	0.0376703	0.0234681	0.0157398	0.0334802	0.0692194	0.0214158	0.000531915
50.859	0.000531915	0.0124334	0.019783	0.0162651	0.00760967	0.116456	0.0374032	0.0247718	0.0162644	0.0334802	0.0692194	0.0220107	0.000531915
50.881	0	0.0130255	0.0204212	0.0159639	0.00760967	0.114384	0.037136	0.0254237	0.0167891	0.0343612	0.0677467	0.0226056	0.000531915
50.903	0	0.0136175	0.0210593	0.0153614	0.00783348	0.112313	0.0368688	0.0260756	0.0178384	0.0352423	0.0662739	0.0232005	0.00106383
50.924	0	0.0142096	0.0216975	0.0150602	0.0080573	0.110242	0.0366017	0.0267275	0.0183631	0.0361233	0.0662739	0.0243902	0.00106383
50.946	0	0.0142096	0.0223357	0.0144578	0.0080573	0.10817	0.0363345	0.0273794	0.0188877	0.0370044	0.0648012	0.0249851	0.00106383
50.968	0	0.0148017	0.023612	0.0141566	0.00828111	0.106329	0.0360673	0.0280313	0.0194124	0.0378855	0.0648012	0.02558	0.00106383
50.989	0	0.0153937	0.0242502	0.0135542	0.00850492	0.104258	0.0358002	0.0286832	0.019937	0.0378855	0.0633284	0.0267698	0.00159574
51.011	0	0.0159858	0.0248883	0.013253	0.00872874	0.102186	0.035533	0.029987	0.0209864	0.0387665	0.0618557	0.0273647	0.00159574
51.033	0	0.0165779	0.0255265	0.0126506	0.00895255	0.100345	0.0352658	0.0306389	0.021511	0.0396476	0.0618557	0.0279595	0.00159574
51.055	0.000531915	0.0171699	0.0261646	0.0123494	0.00895255	0.0982739	0.0349987	0.0312907	0.0220357	0.0405286	0.0603829	0.0291493	0.00159574
51.076	0.000531915	0.017762	0.0268028	0.011747	0.00917637	0.0964327	0.0344643	0.0319426	0.0225603	0.0414097	0.0589102	0.0297442	0.00212766
51.098	0.000531915	0.0183541	0.027441	0.0114458	0.00940018	0.0943613	0.0341972	0.0332464	0.0236097	0.0422907	0.0589102	0.030934	0.00212766
51.12	0.000531915	0.0189461	0.0287173	0.0111446	0.00962399	0.0925201	0.03393	0.0338983	0.0241343	0.0431718	0.0574374	0.0315289	0.00212766
51.142	0.000531915	0.0195382	0.0293555	0.0105422	0.00984781	0.0906789	0.0336628	0.0345502	0.024659	0.0440529	0.0574374	0.0321237	0.00265957
51.163	0.000531915	0.0201303	0.0299936	0.010241	0.0100716	0.0888377	0.0333957	0.0352021	0.0257083	0.0440529	0.0559647	0.0333135	0.00265957
51.185	0.000531915	0.0207223	0.0306318	0.00993976	0.0100716	0.0869965	0.0328613	0.0365059	0.0262329	0.0449339	0.0544919	0.0339084	0.00265957
51.207	0.000531915	0.0207223	0.0319081	0.00963855	0.0102954	0.0849252	0.0325942	0.0371578	0.0267576	0.045815	0.0544919	0.0350982	0.00319149
51.229	0.00106383	0.0213144	0.0325463	0.00903614	0.0105192	0.0833142	0.032327	0.0378096	0.0278069	0.046696	0.0530191	0.035693	0.00319149
51.25	0.00106383	0.0224985	0.0331844	0.00873494	0.0107431	0.081473	0.0320598	0.0391134	0.0283316	0.0475771	0.0530191	0.0368828	0.0037234
51.272	0.00106383	0.0230906	0.0338226	0.00843373	0.0109669	0.0796318	0.0317927	0.0397653	0.0293809	0.0484581	0.0515464	0.0380726	0.0037234
51.294	0.00106383	0.0236827	0.0350989	0.00813253	0.0111907	0.0777906	0.0312583	0.0410691	0.0299056	0.0493392	0.0515464	0.0386675	0.00425532
51.316	0.00159574	0.0242747	0.0357371	0.00753012	0.0114145	0.0761795	0.0309912	0.041721	0.0309549	0.0502203	0.0500736	0.0398572	0.00425532
51.337	0.00159574	0.0248668	0.0370134	0.00722892	0.0116383	0.0743383	0.030724	0.0423729	0.0314795	0.0511013	0.0500736	0.0404521	0.00425532
51.359	0.00159574	0.0254589	0.0376516	0.00692771	0.0118621	0.0727273	0.0301897	0.0436767	0.0325289	0.0519824	0.0486009	0.0416419	0.00478723
51.381	0.00159574	0.0260509	0.0382897	0.00662651	0.0123098	0.0708861	0.0299225	0.0443286	0.0330535	0.0528634	0.0486009	0.0428316	0.00478723
51.403	0.00212766	0.026643	0.039566	0.0063253	0.0125336	0.069275	0.0296554	0.0456323	0.0341028	0.0537445	0.0471281	0.0434265	0.00531915
51.424	0.00212766	0.0272351	0.0402042	0.0060241	0.0127574	0.067664	0.029121	0.0462842	0.0346275	0.0546256	0.0471281	0.0446163	0.00585106
51.446	0.00212766	0.0278271	0.0414805	0.00572289	0.0129812	0.0660529	0.0288539	0.047588	0.0356768	0.0555066	0.0456554	0.0458061	0.00585106
51.468	0.00265957	0.0284192	0.0421187	0.00542169	0.013205	0.0644419	0.0285867	0.0482399	0.0362015	0.0563877	0.0456554	0.0469958	0.00638298
51.49	0.00265957	0.0296033	0.043395	0.00512048	0.0136526	0.0628308	0.0280524	0.0495437	0.0372508	0.0572687	0.0456554	0.0475907	0.00638298
51.511	0.00265957	0.0301954	0.0440332	0.00481928	0.0138765	0.0612198	0.0277852	0.0508475	0.0383001	0.0581498	0.0441826	0.0487805	0.00691489
51.533	0.00319149	0.0307874	0.0453095	0.00451807	0.0141003	0.0598389	0.027518	0.0514993	0.0388248	0.0590308	0.0441826	0.0499703	0.00691489
51.555	0.00319149	0.0313795	0.0465858	0.00421687	0.0145479	0.0582278	0.0269837	0.0528031	0.0398741	0.0599119	0.0441826	0.05116	0.00744681
51.577	0.0037234	0.0319716	0.047224	0.00391566	0.0147717	0.056847	0.0267165	0.053455	0.0409234	0.060793	0.0427099	0.0523498	0.00797872
51.598	0.0037234	0.0331557	0.0485003	0.00361446	0.0149955	0.0552359	0.0261822	0.0547588	0.0414481	0.061674	0.0427099	0.0529447	0.00797872
51.62	0.00425532	0.0337478	0.0491385	0.00331325	0.0154432	0.053855	0.025915	0.0560626	0.0424974	0.0634361	0.0427099	0.0541344	0.00851064
51.642	0.00425532	0.0343398	0.0504148	0.00331325	0.015667	0.0524741	0.0253807	0.0567145	0.0435467	0.0643172	0.0427099	0.0553242	0.00904255
51.664	0.00425532	0.0349319	0.0516911	0.00301205	0.0161146	0.0510932	0.0251135	0.0580183	0.0440714	0.0651982	0.0427099	0.056514	0.00904255
51.685	0.00478723	0.036116	0.0523293	0.00271084	0.0165622	0.0497123	0.0245792	0.059322	0.0451207	0.0660793	0.0412371	0.0577037	0.00957447
51.707	0.00478723	0.0367081	0.0536056	0.00240964	0.016786	0.0483314	0.024312	0.0599739	0.04617	0.0669604	0.0412371	0.0588935	0.0101064
51.729	0.00531915	0.0373002	0.0548819	0.00240964	0.0172337	0.0469505	0.0240449	0.0612777	0.0472193	0.0678414	0.0412371	0.0600833	0.0101064
51.751	0.00585106	0.0384843	0.0561583	0.00210843	0.0176813	0.0455696	0.0235106	0.0625815	0.047744	0.0687225	0.0412371	0.0612731	0.0106383
51.772	0.00585106	0.0390764	0.0567964	0.00180723	0.0181289	0.0444189	0.0232434	0.0632334	0.0487933	0.0696035	0.0412371	0.0624628	0.0111702
51.794	0.00638298	0.0396684	0.0580728	0.00180723	0.0183527	0.043038	0.0227091	0.0645372	0.0498426	0.0704846	0.0412371	0.0636526	0.0111702
51.816	0.00638298	0.0408526	0.0593491	0.00150602	0.0188004	0.0418872	0.0224419	0.0658409	0.0508919	0.0722467	0.0412371	0.0648424	0.0117021
51.838	0.00691489	0.0414446	0.0606254	0.00120482	0.019248	0.0405063	0.0219076	0.0671447	0.0519412	0.0731278	0.0412371	0.0660321	0.012234
51.859	0.00691489	0.0426288	0.0612636	0.00120482	0.0196956	0.0393556	0.0216404	0.0677966	0.0529906	0.0740088	0.0412371	0.0672219	0.012766
51.881	0.00744681	0.0432208	0.0625399	0.000903614	0.0201432	0.0382048	0.0211061	0.0691004	0.0535152	0.0748899	0.0412371	0.0684117	0.0132979
51.903	0.00797872	0.0438129	0.0638162	0.000903614	0.0208147	0.0370541	0.0208389	0.0704042	0.0545645	0.0757709	0.0412371	0.0696014	0.0132979
51.925	0.00797872	0.044997	0.0650925	0.00060241	0.0212623	0.0359033	0.0203046	0.071708	0.0556139	0.076652	0.0412371	0.0707912	0.0138298
51.946	0.00851064	0.0455891	0.0663689	0.00060241	0.0217099	0.0347526	0.0197702	0.0730117	0.0566632	0.0784141	0.0412371	0.071981	0.0143617
51.968	0.00904255	0.0467732	0.0676452	0.00060241	0.0221576	0.0336018	0.0195031	0.0743155	0.0577125	0.0792952	0.0412371	0.0731707	0.0148936
51.99	0.00904255	0.0473653	0.0689215	0.000301205	0.022829	0.0324511	0.0189687	0.0749674	0.0587618	0.0801762	0.0412371	0.0749554	0.0154255
52.012	0.00957447	0.0485494	0.0701978	0.000301205	0.0232766	0.0313003	0.0187016	0.0762712	0.0598111	0.0810573	0.0412371	0.0761452	0.0154255
52.033	0.0101064	0.0491415	0.0714742	0.000301205	0.0239481	0.0303797	0.0181672	0.077575	0.0608604	0.0819383	0.0412371	0.0773349	0.0159574
52.055	0.0101064	0.0503256	0.0727505	0	0.0243957	0.029229	0.0179001	0.0788787	0.0619098	0.0837004	0.0412371	0.0785247	0.0164894
52.077	0.0106383	0.0509177	0.0740268	0	0.0250671	0.0283084	0.0173657	0.0801825	0.0629591	0.0845815	0.0412371	0.0797145	0.0170213
52.099	0.0111702	0.0521018	0.0753031	0	0.0257386	0.0271577	0.0170986	0.0814863	0.0640084	0.0854626	0.0427099	0.0814991	0.0175532
52.12	0.0111702	0.053286	0.0765795	0	0.0261862	0.0262371	0.0165643	0.0827901	0.0650577	0.0863436	0.0427099	0.0826889	0.0180851
52.142	0.0117021	0.053878	0.0778558	0	0.0268577	0.0253165	0.0162971	0.0840939	0.066107	0.0881057	0.0427099	0.0838786	0.018617
52.164	0.012234	0.0550622	0.0791321	0	0.0275291	0.0241657	0.0157628	0.0853977	0.0671563	0.0889868	0.0427099	0.0850684	0.0191489
52.186	0.012766	0.0556542	0.0804084	0	0.0282005	0.0232451	0.0154956	0.0867014	0.0682057	0.0898678	0.0427099	0.0868531	0.0196809
52.207	0.0132979	0.0568384	0.0816847	0	0.028872	0.0223245	0.0149613	0.0880052	0.069255	0.0907489	0.0441826	0.0880428	0.0202128
52.229	0.0132979	0.0580225	0.0829611	0	0.0295434	0.0214039	0.0146941	0.089309	0.0703043	0.092511	0.0441826	0.0892326	0.0202128
52.251	0.0138298	0.0586146	0.0842374	0	0.0302149	0.0204833	0.0141598	0.0906128	0.0713536	0.0933921	0.0441826	0.0910173	0.0207447
52.273	0.0143617	0.0597987	0.0855137	0	0.0311101	0.0195627	0.0138926	0.0919166	0.0724029	0.0942731	0.0456554	0.092207	0.0212766
52.294	0.0148936	0.0609828	0.0874282	0	0.0317816	0.0186421	0.0133583	0.0932203	0.0739769	0.0951542	0.0456554	0.0933968	0.0218085
52.316	0.0154255	0.0615749	0.0887045	0	0.032453	0.0177215	0.0130911	0.0945241	0.0750262	0.0969163	0.0456554	0.0951814	0.0223404
52.338	0.0154255	0.062759	0.0899809	0.000301205	0.0333483	0.0170311	0.0125568	0.0958279	0.0760756	0.0977974	0.0471281	0.0963712	0.0228723
52.36	0.0159574	0.0639432	0.0912572	0.000301205	0.0340197	0.0161105	0.0122896	0.0971317	0.0771249	0.0986784	0.0471281	0.0981559	0.0234043
52.381	0.0164894	0.0651273	0.0925335	0.000301205	0.034915	0.01542	0.0117553	0.0984355	0.0781742	0.100441	0.0471281	0.0993456	0.0239362
52.403	0.0170213	0.0657194	0.0938098	0.000301205	0.0358102	0.0144994	0.0114881	0.0997392	0.0792235	0.101322	0.0486009	0.100535	0.0244681
52.425	0.0175532	0.0669035	0.0957243	0.00060241	0.0364816	0.013809	0.0109538	0.101043	0.0807975	0.102203	0.0486009	0.10232	0.0255319
52.447	0.0180851	0.0680876	0.0970006	0.00060241	0.0373769	0.0128884	0.0106866	0.102999	0.0818468	0.103965	0.0486009	0.10351	0.0260638
52.468	0.018617	0.0692718	0.098277	0.000903614	0.0382722	0.0121979	0.0101523	0.104302	0.0828961	0.104846	0.0500736	0.105294	0.0265957
52.49	0.0191489	0.0704559	0.100191	0.000903614	0.0391674	0.0115075	0.00988512	0.105606	0.0839454	0.105727	0.0500736	0.106484	0.0271277
52.512	0.0196809	0.071048	0.101468	0.00120482	0.0400627	0.010817	0.00935079	0.10691	0.0855194	0.107489	0.0515464	0.108269	0.0276596
52.534	0.0202128	0.0722321	0.102744	0.00120482	0.0409579	0.0101266	0.00908362	0.108214	0.0865687	0.10837	0.0515464	0.109459	0.0281915
52.555	0.0202128	0.0734162	0.10402	0.00150602	0.0418532	0.00943613	0.00881646	0.109518	0.087618	0.109251	0.0530191	0.111243	0.0287234
52.577	0.0207447	0.0746004	0.105935	0.00180723	0.0429722	0.00874568	0.00828213	0.111473	0.089192	0.111013	0.0530191	0.112433	0.0292553
52.599	0.0212766	0.0757845	0.107211	0.00180723	0.0438675	0.00805524	0.00801496	0.112777	0.0902413	0.111894	0.0544919	0.114218	0.0297872
52.621	0.0218085	0.0769686	0.109126	0.00210843	0.0447628	0.00759494	0.00748063	0.114081	0.0912907	0.113656	0.0544919	0.116002	0.0303191
52.642	0.0223404	0.0781528	0.110402	0.00240964	0.0458818	0.00690449	0.00721347	0.115385	0.0928646	0.114537	0.0559647	0.117192	0.031383
52.664	0.0228723	0.0793369	0.111678	0.00271084	0.0467771	0.00644419	0.0069463	0.116688	0.093914	0.115419	0.0559647	0.118977	0.0319149
52.686	0.0234043	0.080521	0.113593	0.00301205	0.0478962	0.00575374	0.00667913	0.118644	0.0949633	0.117181	0.0574374	0.120761	0.0324468
52.708	0.0239362	0.0817052	0.114869	0.00331325	0.0487914	0.00529344	0.0061448	0.119948	0.0965373	0.118062	0.0574374	0.121951	0.0329787
52.729	0.0244681	0.0828893	0.116784	0.00361446	0.0499105	0.00483314	0.00587764	0.121252	0.0975866	0.119824	0.0589102	0.123736	0.0335106
52.751	0.0255319	0.0840734	0.11806	0.00391566	0.0510295	0.00437284	0.00561047	0.123207	0.0991605	0.120705	0.0603829	0.125521	0.0345745
52.773	0.0260638	0.0852575	0.119336	0.00421687	0.0521486	0.00391254	0.00534331	0.124511	0.10021	0.122467	0.0603829	0.12671	0.0351064
52.794	0.0265957	0.0864417	0.121251	0.00451807	0.0532677	0.00345224	0.00480898	0.125815	0.101259	0.123348	0.0618557	0.128495	0.0356383
52.816	0.0271277	0.0876258	0.122527	0.00481928	0.0543868	0.00299194	0.00454181	0.127119	0.102833	0.124229	0.0618557	0.13028	0.0361702
52.838	0.0276596	0.0888099	0.124442	0.00542169	0.0555058	0.00253165	0.00427465	0.129074	0.103882	0.125991	0.0633284	0.131469	0.037234
52.86	0.0281915	0.0899941	0.125718	0.00572289	0.0566249	0.0023015	0.00400748	0.130378	0.105456	0.126872	0.0633284	0.133254	0.037766
52.881	0.0287234	0.0911782	0.127632	0.0060241	0.057744	0.0018412	0.00374032	0.131682	0.106506	0.128634	0.0648012	0.135039	0.0382979
52.903	0.0292553	0.0923623	0.129547	0.00662651	0.058863	0.00161105	0.00347315	0.133638	0.10808	0.129515	0.0662739	0.136823	0.0393617
52.925	0.0297872	0.0935465	0.130823	0.00692771	0.0599821	0.0013809	0.00320598	0.134941	0.109129	0.131278	0.0662739	0.138608	0.0398936
52.947	0.0303191	0.0947306	0.132738	0.00753012	0.0611012	0.000920598	0.00293882	0.136245	0.110703	0.132159	0.0677467	0.139798	0.0404255
52.968	0.031383	0.0959147	0.134014	0.00783133	0.062444	0.000690449	0.00267165	0.138201	0.111752	0.133921	0.0692194	0.141582	0.0414894
52.99	0.0319149	0.0970989	0.135929	0.00843373	0.0635631	0.000460299	0.00240449	0.139505	0.113326	0.134802	0.0692194	0.143367	0.0420213
53.012	0.0324468	0.098283	0.137205	0.00873494	0.064906	0.000460299	0.00213732	0.140808	0.1149	0.136564	0.0706922	0.145152	0.0425532
53.034	0.0329787	0.100059	0.139119	0.00933735	0.0660251	0.00023015	0.00187016	0.142764	0.11595	0.137445	0.0721649	0.146936	0.043617
53.055	0.0335106	0.101243	0.141034	0.00993976	0.0673679	0	0.00160299	0.144068	0.117524	0.139207	0.0721649	0.148721	0.0441489
53.077	0.0345745	0.102427	0.14231	0.0105422	0.068487	0	0.00133583	0.146023	0.118573	0.140088	0.0736377	0.150506	0.0452128
53.099	0.0351064	0.103612	0.144225	0.0108434	0.0698299	0	0.00133583	0.147327	0.120147	0.14185	0.0751105	0.151695	0.0457447
53.121	0.0356383	0.104796	0.146139	0.0114458	0.0711728	0	0.00106866	0.148631	0.121721	0.143612	0.0751105	0.15348	0.0468085
53.142	0.0361702	0.106572	0.147415	0.0120482	0.0725157	0	0.000801496	0.150587	0.12277	0.144493	0.0765832	0.155265	0.0473404
53.164	0.037234	0.107756	0.14933	0.0126506	0.0736347	0	0.000801496	0.15189	0.124344	0.146256	0.078056	0.157049	0.0484043
53.186	0.037766	0.10894	0.151244	0.013253	0.0749776	0	0.000534331	0.153846	0.125918	0.147137	0.0795287	0.158834	0.0489362
53.208	0.0382979	0.110124	0.152521	0.0138554	0.0763205	0	0.000534331	0.15515	0.126967	0.148899	0.0795287	0.160619	0.05
53.229	0.0393617	0.111901	0.154435	0.014759	0.0776634	0.00023015	0.000267165	0.156454	0.128541	0.14978	0.0810015	0.162403	0.0505319
53.251	0.0398936	0.113085	0.15635	0.0153614	0.0790063	0.000460299	0.000267165	0.158409	0.130115	0.151542	0.0824742	0.164188	0.0515957
53.273	0.0404255	0.114269	0.158264	0.0159639	0.0803491	0.000460299	0.000267165	0.159713	0.131165	0.152423	0.083947	0.165973	0.0521277
53.295	0.0414894	0.115453	0.159541	0.0165663	0.0819158	0.000690449	0	0.161669	0.132739	0.154185	0.083947	0.167757	0.0531915
53.316	0.0420213	0.117229	0.161455	0.0174699	0.0832587	0.000920598	0	0.162973	0.134313	0.155947	0.0854197	0.169542	0.0542553
53.338	0.0425532	0.118413	0.163369	0.0180723	0.0846016	0.0013809	0	0.164928	0.135887	0.156828	0.0868925	0.171327	0.0547872
53.36	0.043617	0.119597	0.165284	0.0189759	0.0859445	0.00161105	0	0.166232	0.137461	0.15859	0.0883652	0.173111	0.0558511
53.382	0.0441489	0.121374	0.167198	0.0195783	0.0875112	0.00207135	0	0.168188	0.13851	0.159471	0.089838	0.175491	0.0569149
53.403	0.0452128	0.122558	0.168475	0.0204819	0.0888541	0.0023015	0	0.169492	0.140084	0.161233	0.0913108	0.177275	0.0574468
53.425	0.0457447	0.124334	0.170389	0.0210843	0.090197	0.0027618	0	0.171447	0.141658	0.162996	0.0927835	0.17906	0.0585106
53.447	0.0468085	0.125518	0.172304	0.021988	0.0917637	0.00322209	0	0.172751	0.143232	0.163877	0.0927835	0.180845	0.0595745
53.469	0.0473404	0.126702	0.174218	0.0228916	0.0931065	0.00391254	0.000267165	0.174707	0.144806	0.165639	0.0942563	0.182629	0.0601064
53.49	0.0484043	0.128478	0.176133	0.0237952	0.0946732	0.00437284	0.000267165	0.17601	0.145855	0.167401	0.095729	0.184414	0.0611702
53.512	0.0489362	0.129663	0.178047	0.0246988	0.0960161	0.00483314	0.000267165	0.177966	0.147429	0.168282	0.0972018	0.186199	0.062234
53.534	0.05	0.131439	0.179962	0.0256024	0.0975828	0.00552359	0.000534331	0.17927	0.149003	0.170044	0.0986745	0.187983	0.0632979
53.556	0.0505319	0.132623	0.181238	0.026506	0.0991495	0.00621404	0.000534331	0.181226	0.150577	0.171806	0.100147	0.190363	0.0638298
53.577	0.0515957	0.134399	0.183153	0.0274096	0.100716	0.00690449	0.000801496	0.182529	0.152151	0.172687	0.10162	0.192148	0.0648936
53.599	0.0521277	0.135583	0.185067	0.0283133	0.102059	0.00759494	0.000801496	0.184485	0.153725	0.174449	0.103093	0.193932	0.0659574
53.621	0.0531915	0.137359	0.186981	0.0292169	0.103626	0.00828539	0.00106866	0.185789	0.155299	0.176211	0.104566	0.195717	0.0670213
53.643	0.0542553	0.138544	0.188896	0.0301205	0.105192	0.00920598	0.00133583	0.187744	0.156873	0.177093	0.107511	0.197501	0.0680851
53.664	0.0547872	0.14032	0.19081	0.0310241	0.106759	0.00989643	0.00160299	0.189048	0.158447	0.178855	0.108984	0.199881	0.068617
53.686	0.0558511	0.141504	0.192725	0.0322289	0.108326	0.010817	0.00187016	0.191004	0.160021	0.180617	0.110457	0.201666	0.0696809
53.708	0.0569149	0.14328	0.194639	0.0331325	0.109893	0.0117376	0.00213732	0.192308	0.161595	0.181498	0.111929	0.20345	0.0707447
53.73	0.0574468	0.145056	0.196554	0.0343373	0.111459	0.0126582	0.00240449	0.194263	0.163169	0.18326	0.113402	0.205235	0.0718085
53.751	0.0585106	0.14624	0.198468	0.035241	0.113026	0.0135788	0.00267165	0.195567	0.164743	0.185022	0.114875	0.207615	0.0728723
53.773	0.0595745	0.148017	0.200383	0.0364458	0.114593	0.0144994	0.00320598	0.197523	0.165792	0.185903	0.11782	0.209399	0.0739362
53.795	0.0601064	0.149201	0.202297	0.0373494	0.116159	0.01542	0.00347315	0.198827	0.167366	0.187665	0.119293	0.211184	0.075
53.817	0.0611702	0.150977	0.204212	0.0385542	0.11795	0.0165708	0.00374032	0.200782	0.16894	0.189427	0.120766	0.213563	0.0760638
53.838	0.062234	0.152753	0.206126	0.039759	0.119517	0.0177215	0.00427465	0.202738	0.171039	0.191189	0.122239	0.215348	0.0771277
53.86	0.0632979	0.153937	0.208041	0.0409639	0.121083	0.0186421	0.00480898	0.204042	0.172613	0.19207	0.125184	0.217133	0.0781915
53.882	0.0638298	0.155713	0.209955	0.0421687	0.122874	0.0197929	0.00507614	0.205997	0.174187	0.193833	0.126657	0.219512	0.0792553
53.904	0.0648936	0.15749	0.21187	0.0430723	0.12444	0.0211738	0.00561047	0.207301	0.175761	0.195595	0.12813	0.221297	0.0803191
53.925	0.0659574	0.159266	0.213784	0.0442771	0.126231	0.0223245	0.0061448	0.209257	0.177335	0.196476	0.131075	0.223081	0.081383
53.947	0.0670213	0.16045	0.215699	0.0457831	0.127798	0.0234753	0.00667913	0.210561	0.178909	0.198238	0.132548	0.225461	0.0824468
53.969	0.0680851	0.162226	0.217613	0.046988	0.129588	0.0248562	0.00721347	0.212516	0.180483	0.2	0.135493	0.227246	0.0835106
53.991	0.068617	0.164002	0.219528	0.0481928	0.131155	0.0260069	0.0077478	0.214472	0.182057	0.201762	0.136966	0.22903	0.0845745
54.012	0.0696809	0.165779	0.221442	0.0493976	0.132945	0.0273878	0.00828213	0.215776	0.183631	0.202643	0.139912	0.23141	0.0856383
54.034	0.0707447	0.166963	0.223357	0.0506024	0.134736	0.0287687	0.00881646	0.217731	0.185205	0.204405	0.141384	0.233195	0.0867021
54.056	0.0718085	0.168739	0.225271	0.0521084	0.136526	0.0299194	0.00961795	0.219035	0.186779	0.206167	0.14433	0.235574	0.087766
54.078	0.0728723	0.170515	0.227186	0.0533133	0.138093	0.0315305	0.0101523	0.220991	0.188353	0.20793	0.145803	0.237359	0.0888298
54.099	0.0739362	0.172291	0.2291	0.0548193	0.139884	0.0329114	0.0109538	0.222947	0.189927	0.209692	0.148748	0.239143	0.0898936
54.121	0.075	0.174067	0.231015	0.0560241	0.141674	0.0342923	0.0114881	0.22425	0.192025	0.210573	0.151694	0.241523	0.0914894
54.143	0.0760638	0.175844	0.233567	0.0575301	0.143465	0.0356732	0.0122896	0.226206	0.193599	0.212335	0.153166	0.243308	0.0925532
54.165	0.0771277	0.177028	0.235482	0.0587349	0.145255	0.0372842	0.0130911	0.22751	0.195173	0.214097	0.156112	0.245687	0.093617
54.186	0.0781915	0.178804	0.237396	0.060241	0.147269	0.0386651	0.0138926	0.229465	0.196747	0.215859	0.159057	0.247472	0.0946809
54.208	0.0792553	0.18058	0.239311	0.061747	0.14906	0.0402762	0.0146941	0.231421	0.198321	0.217621	0.16053	0.249851	0.0957447
54.23	0.0803191	0.182356	0.241225	0.063253	0.15085	0.0418872	0.0154956	0.232725	0.199895	0.218502	0.163476	0.251636	0.0973404
54.252	0.081383	0.184133	0.24314	0.064759	0.152641	0.0434983	0.0162971	0.234681	0.201994	0.220264	0.166421	0.254015	0.0984043
54.273	0.0824468	0.185909	0.245054	0.0662651	0.154432	0.0451093	0.0170986	0.235984	0.203568	0.222026	0.169367	0.2558	0.0994681
54.295	0.0835106	0.187685	0.246969	0.0677711	0.156446	0.0467204	0.0179001	0.23794	0.205142	0.223789	0.172312	0.25818	0.100532
54.317	0.0845745	0.189461	0.248883	0.0692771	0.158236	0.0483314	0.0189687	0.239896	0.206716	0.225551	0.173785	0.259964	0.102128
54.339	0.0856383	0.191237	0.250798	0.0707831	0.160251	0.0499425	0.0197702	0.241199	0.20829	0.226432	0.17673	0.262344	0.103191
54.36	0.0867021	0.193014	0.25335	0.0722892	0.162041	0.0515535	0.0208389	0.243155	0.210388	0.228194	0.179676	0.264128	0.104255
54.382	0.087766	0.19479	0.255265	0.0737952	0.164056	0.0533947	0.0216404	0.245111	0.211962	0.229956	0.182622	0.266508	0.105851
54.404	0.0888298	0.196566	0.257179	0.0756024	0.165846	0.0550058	0.0227091	0.246415	0.213536	0.231718	0.185567	0.268293	0.106915
54.426	0.0898936	0.198342	0.259094	0.0771084	0.16786	0.056847	0.0237777	0.24837	0.21511	0.23348	0.188513	0.270672	0.108511
54.447	0.0914894	0.200118	0.261008	0.0786145	0.169875	0.058458	0.0245792	0.250326	0.217209	0.235242	0.191458	0.272457	0.109574
54.469	0.0925532	0.201895	0.262923	0.0804217	0.171665	0.0602992	0.0256479	0.25163	0.218783	0.237004	0.194404	0.274836	0.110638
54.491	0.093617	0.203671	0.264837	0.0819277	0.173679	0.0621404	0.0267165	0.253585	0.220357	0.237885	0.197349	0.276621	0.112234
54.513	0.0946809	0.205447	0.26739	0.0837349	0.175694	0.0639816	0.0280524	0.255541	0.221931	0.239648	0.200295	0.279001	0.113298
54.534	0.0957447	0.207223	0.269304	0.085241	0.177708	0.0658228	0.029121	0.256845	0.224029	0.24141	0.20324	0.28138	0.114894
54.556	0.0973404	0.209591	0.271219	0.0870482	0.179722	0.067664	0.0301897	0.258801	0.225603	0.243172	0.206186	0.283165	0.115957
54.578	0.0984043	0.211368	0.273133	0.0888554	0.181737	0.0695052	0.0312583	0.260756	0.227177	0.244934	0.209131	0.285544	0.117553
54.599	0.0994681	0.213144	0.275048	0.0906627	0.183751	0.0713464	0.0325942	0.26206	0.229276	0.246696	0.212077	0.287329	0.118617
54.621	0.100532	0.21492	0.276962	0.0921687	0.185765	0.0731876	0.0336628	0.264016	0.23085	0.248458	0.215022	0.289709	0.120213
54.643	0.102128	0.216696	0.278877	0.0939759	0.18778	0.0750288	0.0349987	0.265971	0.232424	0.25022	0.217968	0.292088	0.121277
54.665	0.103191	0.218472	0.281429	0.0957831	0.189794	0.07687	0.0363345	0.267275	0.234523	0.251982	0.220913	0.293873	0.122872
54.686	0.104255	0.220841	0.283344	0.0975904	0.191808	0.0789413	0.0374032	0.269231	0.236097	0.252863	0.223859	0.296252	0.124468
54.708	0.105851	0.222617	0.285258	0.0993976	0.193823	0.0807825	0.038739	0.271186	0.237671	0.254626	0.226804	0.298632	0.125532
54.73	0.106915	0.224393	0.287173	0.101205	0.195837	0.0828539	0.0400748	0.273142	0.239769	0.256388	0.22975	0.300416	0.127128
54.752	0.108511	0.226169	0.289087	0.103012	0.197851	0.0846951	0.0414106	0.274446	0.241343	0.25815	0.232695	0.302796	0.128723
54.773	0.109574	0.228538	0.291002	0.10512	0.199866	0.0867664	0.0427465	0.276402	0.243442	0.259912	0.235641	0.304581	0.129787
54.795	0.110638	0.230314	0.292916	0.106928	0.202104	0.0886076	0.0440823	0.278357	0.245016	0.261674	0.238586	0.30696	0.131383
54.817	0.112234	0.23209	0.295469	0.108735	0.204118	0.0906789	0.0454181	0.279661	0.24659	0.263436	0.241532	0.30934	0.132979
54.839	0.113298	0.233866	0.297384	0.110542	0.206132	0.0927503	0.0470211	0.281617	0.248688	0.265198	0.244477	0.311124	0.134043
54.86	0.114894	0.236234	0.299298	0.112651	0.208371	0.0945915	0.0483569	0.283572	0.250262	0.26696	0.247423	0.313504	0.135638
54.882	0.115957	0.238011	0.301213	0.114458	0.210385	0.0966628	0.0499599	0.285528	0.252361	0.268722	0.250368	0.315883	0.137234
54.904	0.117553	0.239787	0.303127	0.116566	0.212399	0.0987342	0.0512958	0.286832	0.253935	0.270485	0.253314	0.317668	0.13883
54.926	0.118617	0.242155	0.305041	0.118373	0.214637	0.100806	0.0528987	0.288787	0.256034	0.272247	0.256259	0.320048	0.140426
54.947	0.120213	0.243931	0.306956	0.120482	0.216652	0.102877	0.0542346	0.290743	0.257608	0.274009	0.259205	0.322427	0.142021
54.969	0.121277	0.245708	0.309509	0.122289	0.218666	0.104948	0.0558376	0.292047	0.259706	0.275771	0.26215	0.324807	0.143085
54.991	0.122872	0.248076	0.311423	0.124398	0.220904	0.10702	0.0574406	0.294003	0.26128	0.277533	0.265096	0.326591	0.144681
55.013	0.124468	0.249852	0.313338	0.126506	0.222919	0.109091	0.0590435	0.295958	0.263379	0.279295	0.268041	0.328971	0.146277
55.034	0.125532	0.251628	0.315252	0.128313	0.225157	0.111162	0.0606465	0.297914	0.264953	0.281057	0.270987	0.33135	0.147872
55.056	0.127128	0.253996	0.317167	0.130422	0.227171	0.113234	0.0622495	0.299218	0.267051	0.282819	0.273932	0.333135	0.149468
55.078	0.128723	0.255773	0.319081	0.13253	0.229185	0.115305	0.0638525	0.301173	0.268625	0.284581	0.276878	0.335515	0.151064
55.1	0.129787	0.258141	0.320996	0.134639	0.231423	0.117376	0.0654555	0.303129	0.270724	0.286344	0.279823	0.337894	0.15266
55.121	0.131383	0.259917	0.323548	0.136747	0.233438	0.119448	0.0670585	0.305085	0.272298	0.288106	0.282769	0.340274	0.154255
55.143	0.132979	0.262285	0.325463	0.138855	0.235676	0.121519	0.0689287	0.306389	0.274397	0.289868	0.285714	0.342058	0.155851
55.165	0.134043	0.264062	0.327377	0.140663	0.23769	0.12359	0.0705317	0.308344	0.275971	0.29163	0.28866	0.344438	0.157447
55.187	0.135638	0.265838	0.329292	0.142771	0.239928	0.125662	0.0721347	0.3103	0.278069	0.293392	0.291605	0.346817	0.159043
55.208	0.137234	0.268206	0.331206	0.145181	0.241943	0.127733	0.0740048	0.312256	0.280168	0.295154	0.294551	0.349197	0.160638
55.23	0.13883	0.269982	0.333121	0.147289	0.243957	0.129804	0.0756078	0.313559	0.281742	0.296916	0.297496	0.350982	0.162234
55.252	0.140426	0.272351	0.335035	0.149398	0.246195	0.132106	0.077478	0.315515	0.283841	0.298678	0.300442	0.353361	0.16383
55.274	0.142021	0.274127	0.337588	0.151506	0.248209	0.134177	0.0793481	0.317471	0.285414	0.300441	0.303387	0.355741	0.165957
55.295	0.143085	0.276495	0.339502	0.153614	0.250448	0.136249	0.0812183	0.319426	0.287513	0.302203	0.306333	0.35812	0.167553
55.317	0.144681	0.278271	0.341417	0.155723	0.252462	0.13832	0.0828213	0.32073	0.289612	0.303965	0.309278	0.3605	0.169149
55.339	0.146277	0.280639	0.343331	0.158133	0.254476	0.140621	0.0846914	0.322686	0.291186	0.305727	0.312224	0.362284	0.170745
55.361	0.147872	0.282416	0.345246	0.160241	0.256714	0.142693	0.0865616	0.324641	0.293284	0.307489	0.315169	0.364664	0.17234
55.382	0.149468	0.284784	0.34716	0.162349	0.258729	0.144764	0.0884317	0.326597	0.295383	0.309251	0.318115	0.367043	0.174468
55.404	0.151064	0.28656	0.349075	0.164759	0.260743	0.147066	0.0903019	0.327901	0.296957	0.311013	0.32106	0.369423	0.176064
55.426	0.15266	0.288928	0.351627	0.166867	0.262981	0.149137	0.0924392	0.329857	0.299056	0.312775	0.324006	0.371802	0.17766
55.448	0.154255	0.290705	0.353542	0.169277	0.264996	0.151208	0.0943094	0.331812	0.301154	0.314537	0.326951	0.373587	0.179787
55.469	0.155851	0.293073	0.355456	0.171386	0.26701	0.15351	0.0961795	0.333768	0.303253	0.3163	0.328424	0.375967	0.181383
55.491	0.157447	0.294849	0.357371	0.173795	0.269248	0.155581	0.0980497	0.335072	0.304827	0.318062	0.33137	0.378346	0.182979
55.513	0.159043	0.297217	0.359285	0.175904	0.271262	0.157883	0.100187	0.337027	0.306925	0.319824	0.334315	0.380726	0.185106
55.535	0.160638	0.299586	0.3612	0.178313	0.273277	0.159954	0.102057	0.338983	0.309024	0.321586	0.337261	0.383105	0.186702
55.556	0.162234	0.301362	0.363114	0.180422	0.275291	0.162255	0.104194	0.340939	0.311123	0.323348	0.340206	0.385485	0.188298
55.578	0.16383	0.30373	0.365667	0.182831	0.277305	0.164327	0.106065	0.342243	0.312697	0.32511	0.341679	0.387864	0.190426
55.6	0.165957	0.305506	0.367581	0.185241	0.279543	0.166628	0.108202	0.344198	0.314795	0.326872	0.344624	0.389649	0.192021
55.622	0.167553	0.307874	0.369496	0.187349	0.281558	0.1687	0.110072	0.346154	0.316894	0.328634	0.34757	0.392029	0.194149
55.643	0.169149	0.309651	0.37141	0.189759	0.283572	0.170771	0.112209	0.34811	0.318993	0.330396	0.350515	0.394408	0.195745
55.665	0.170745	0.312019	0.373325	0.192169	0.285586	0.173072	0.114347	0.349413	0.321091	0.332159	0.351988	0.396788	0.197872
55.687	0.17234	0.314387	0.375239	0.194578	0.287601	0.175144	0.116217	0.351369	0.322665	0.333921	0.354934	0.399167	0.199468
55.709	0.174468	0.316163	0.377154	0.196988	0.289615	0.177445	0.118354	0.353325	0.324764	0.335683	0.357879	0.401547	0.201596
55.73	0.176064	0.318532	0.379068	0.199096	0.291629	0.179747	0.120492	0.35528	0.326863	0.337445	0.360825	0.403926	0.203191
55.752	0.17766	0.320308	0.381621	0.201506	0.293644	0.181818	0.122629	0.356584	0.328961	0.340088	0.362297	0.406306	0.205319
55.774	0.179787	0.322676	0.383535	0.203916	0.295658	0.18412	0.124766	0.35854	0.33106	0.34185	0.365243	0.408685	0.207447
55.796	0.181383	0.325044	0.38545	0.206325	0.297672	0.186191	0.126904	0.360495	0.333158	0.343612	0.368189	0.411065	0.209043
55.817	0.182979	0.326821	0.387364	0.208735	0.299687	0.188493	0.129041	0.362451	0.335257	0.345374	0.369661	0.412849	0.21117
55.839	0.185106	0.329189	0.389279	0.211145	0.301477	0.190564	0.131178	0.363755	0.336831	0.347137	0.372607	0.415229	0.213298
55.861	0.186702	0.330965	0.391193	0.213554	0.303491	0.192865	0.133316	0.365711	0.33893	0.348899	0.375552	0.417609	0.214894
55.883	0.188298	0.333333	0.393108	0.215964	0.305506	0.194937	0.135453	0.367666	0.341028	0.350661	0.377025	0.419988	0.217021
55.904	0.190426	0.335702	0.395022	0.218373	0.30752	0.197238	0.13759	0.369622	0.343127	0.352423	0.379971	0.422368	0.219149
55.926	0.192021	0.337478	0.396937	0.220783	0.309534	0.19954	0.139995	0.370926	0.345226	0.354185	0.382916	0.424747	0.220745
55.948	0.194149	0.339846	0.399489	0.223193	0.311325	0.201611	0.142132	0.372881	0.347324	0.355947	0.384389	0.427127	0.222872
55.97	0.195745	0.342214	0.401404	0.225602	0.313339	0.203913	0.144269	0.374837	0.349423	0.357709	0.387334	0.429506	0.225
55.991	0.197872	0.343991	0.403318	0.228313	0.315354	0.205984	0.146407	0.376793	0.351522	0.359471	0.388807	0.431886	0.227128
56.013	0.199468	0.346359	0.405233	0.230723	0.317144	0.208285	0.148811	0.378096	0.35362	0.361233	0.391753	0.434265	0.228723
56.035	0.201596	0.348727	0.407147	0.233133	0.319158	0.210357	0.150948	0.380052	0.355719	0.363877	0.393225	0.436645	0.230851
56.057	0.203191	0.350503	0.409062	0.235542	0.320949	0.212658	0.153353	0.382008	0.357817	0.365639	0.396171	0.439024	0.232979
56.078	0.205319	0.352872	0.410976	0.237952	0.322963	0.21496	0.15549	0.383963	0.359916	0.367401	0.399116	0.441404	0.235106
56.1	0.207447	0.354648	0.412891	0.240361	0.324754	0.217031	0.157895	0.385919	0.362015	0.369163	0.400589	0.443783	0.237234
56.122	0.209043	0.357016	0.414805	0.243072	0.326768	0.219333	0.160032	0.387223	0.364113	0.370925	0.403535	0.446163	0.239362
56.144	0.21117	0.359384	0.417358	0.245482	0.328559	0.221404	0.162437	0.389179	0.366212	0.372687	0.405007	0.448543	0.241489
56.165	0.213298	0.36116	0.419272	0.247892	0.330573	0.223705	0.164574	0.391134	0.368311	0.374449	0.407953	0.450922	0.243617
56.187	0.214894	0.363529	0.421187	0.250301	0.332363	0.226007	0.166978	0.39309	0.370409	0.376211	0.409426	0.453302	0.245745
56.209	0.217021	0.365897	0.423101	0.253012	0.334154	0.228078	0.169116	0.394394	0.372508	0.377974	0.412371	0.455086	0.247872
56.231	0.219149	0.368265	0.425016	0.255422	0.336168	0.23038	0.17152	0.396349	0.374607	0.379736	0.413844	0.457466	0.25
56.252	0.220745	0.370041	0.42693	0.257831	0.337959	0.232451	0.173925	0.398305	0.376705	0.381498	0.416789	0.459845	0.252128
56.274	0.222872	0.37241	0.428845	0.260241	0.339749	0.234753	0.176062	0.400261	0.378804	0.384141	0.418262	0.462225	0.254255
56.296	0.225	0.374778	0.430759	0.262952	0.341764	0.237054	0.178466	0.401565	0.380902	0.385903	0.421208	0.464604	0.256383
56.318	0.227128	0.376554	0.432674	0.265361	0.343554	0.239125	0.180871	0.40352	0.383001	0.387665	0.42268	0.466984	0.258511
56.339	0.228723	0.378922	0.434588	0.267771	0.345345	0.241427	0.183008	0.405476	0.3851	0.389427	0.424153	0.469363	0.260638
56.361	0.230851	0.381291	0.437141	0.270482	0.347135	0.243498	0.185413	0.407432	0.387198	0.391189	0.427099	0.471743	0.262766
56.383	0.232979	0.383067	0.439056	0.272892	0.348926	0.2458	0.187817	0.408735	0.389297	0.392952	0.428571	0.474123	0.264894
56.404	0.235106	0.385435	0.44097	0.275301	0.350716	0.248101	0.189955	0.410691	0.391396	0.394714	0.431517	0.476502	0.267021
56.426	0.237234	0.387803	0.442884	0.278012	0.352731	0.250173	0.192359	0.412647	0.393494	0.396476	0.43299	0.478882	0.269149
56.448	0.239362	0.38958	0.444799	0.280422	0.354521	0.252474	0.194764	0.414602	0.395593	0.398238	0.434462	0.481261	0.271277
56.47	0.241489	0.391948	0.446713	0.282831	0.356312	0.254545	0.197168	0.415906	0.397692	0.400881	0.437408	0.483641	0.273404
56.491	0.243617	0.394316	0.448628	0.285542	0.358102	0.256847	0.199305	0.417862	0.39979	0.402643	0.438881	0.48602	0.276064
56.513	0.245745	0.396684	0.450542	0.287952	0.359893	0.259148	0.20171	0.419817	0.401889	0.404405	0.440353	0.4884	0.278191
56.535	0.247872	0.398461	0.452457	0.290361	0.361683	0.26122	0.204114	0.421773	0.403987	0.406167	0.443299	0.490779	0.280319
56.557	0.25	0.400829	0.454371	0.293072	0.363474	0.263521	0.206519	0.423077	0.406086	0.40793	0.444772	0.493159	0.282447
56.578	0.252128	0.403197	0.456286	0.295482	0.365264	0.265593	0.208923	0.425033	0.408185	0.409692	0.446244	0.495538	0.284574
56.6	0.254255	0.405565	0.4582	0.297892	0.367055	0.267894	0.211061	0.426988	0.410283	0.411454	0.44919	0.497918	0.287234
56.622	0.256383	0.407342	0.460115	0.300602	0.368845	0.269965	0.213465	0.428944	0.412382	0.413216	0.450663	0.500297	0.289362
56.644	0.258511	0.40971	0.462668	0.303012	0.370636	0.272267	0.21587	0.430248	0.414481	0.414978	0.452135	0.502677	0.291489
56.665	0.260638	0.412078	0.464582	0.305422	0.372426	0.274568	0.218274	0.432203	0.416579	0.41674	0.453608	0.505057	0.294149
56.687	0.262766	0.413854	0.466496	0.308133	0.373993	0.27664	0.220411	0.434159	0.418678	0.419383	0.456554	0.507436	0.296277
56.709	0.264894	0.416223	0.468411	0.310542	0.375783	0.278941	0.222816	0.436115	0.420776	0.421145	0.458027	0.509221	0.298404
56.731	0.267021	0.418591	0.470325	0.312952	0.377574	0.281013	0.22522	0.437419	0.422875	0.422907	0.459499	0.5116	0.300532
56.752	0.269149	0.420959	0.47224	0.315663	0.379364	0.283314	0.227625	0.439374	0.424974	0.42467	0.460972	0.51398	0.303191
56.774	0.271277	0.422735	0.474154	0.318072	0.381155	0.285386	0.229762	0.44133	0.427072	0.426432	0.462445	0.516359	0.305319
56.796	0.273404	0.425104	0.476069	0.320482	0.382945	0.287457	0.232167	0.442634	0.429171	0.428194	0.46539	0.518739	0.307447
56.818	0.276064	0.427472	0.477983	0.322892	0.384512	0.289758	0.234571	0.444589	0.43127	0.429956	0.466863	0.521118	0.310106
56.839	0.278191	0.42984	0.479898	0.325602	0.386303	0.29183	0.236976	0.446545	0.433368	0.431718	0.468336	0.523498	0.312234
56.861	0.280319	0.431616	0.481812	0.328012	0.388093	0.294131	0.239113	0.448501	0.435467	0.43348	0.469809	0.525877	0.314894
56.883	0.282447	0.433985	0.483727	0.330422	0.389884	0.296203	0.241517	0.449804	0.43809	0.436123	0.471281	0.528257	0.317021
56.905	0.284574	0.436353	0.485641	0.332831	0.39145	0.298274	0.243922	0.45176	0.440189	0.437885	0.472754	0.530637	0.319149
56.926	0.287234	0.438721	0.487556	0.335542	0.393241	0.300575	0.246059	0.453716	0.442288	0.439648	0.474227	0.533016	0.321809
56.948	0.289362	0.440497	0.48947	0.337952	0.395031	0.302647	0.248464	0.455671	0.444386	0.44141	0.4757	0.534801	0.323936
56.97	0.291489	0.442866	0.491385	0.340361	0.396598	0.304718	0.250868	0.456975	0.446485	0.443172	0.477172	0.53718	0.326596
56.992	0.294149	0.445234	0.493299	0.342771	0.398389	0.30702	0.253006	0.458931	0.448583	0.444934	0.478645	0.53956	0.328723
57.013	0.296277	0.447602	0.495214	0.345181	0.400179	0.309091	0.25541	0.460887	0.450682	0.446696	0.480118	0.541939	0.331383
57.035	0.298404	0.449378	0.497128	0.34759	0.401746	0.311162	0.257547	0.462842	0.452781	0.448458	0.481591	0.544319	0.333511
57.057	0.300532	0.451747	0.499043	0.350301	0.403536	0.313234	0.259952	0.464146	0.454879	0.45022	0.483063	0.546698	0.335638
57.079	0.303191	0.454115	0.500957	0.352711	0.405327	0.315305	0.262356	0.466102	0.456978	0.451982	0.484536	0.549078	0.338298
57.1	0.305319	0.455891	0.502872	0.35512	0.406893	0.317376	0.264494	0.468057	0.459077	0.454626	0.486009	0.550863	0.340426
57.122	0.307447	0.458259	0.504786	0.35753	0.408684	0.319448	0.266898	0.469361	0.461175	0.456388	0.487482	0.553242	0.343085
57.144	0.310106	0.460628	0.506701	0.35994	0.410251	0.321519	0.269036	0.471317	0.463274	0.45815	0.488954	0.555622	0.345213
57.166	0.312234	0.462996	0.508615	0.362349	0.412041	0.32359	0.27144	0.473272	0.465373	0.459912	0.490427	0.558001	0.347872
57.187	0.314894	0.464772	0.51053	0.364759	0.413608	0.325662	0.273577	0.475228	0.467471	0.461674	0.4919	0.560381	0.35
57.209	0.317021	0.46714	0.512444	0.367169	0.415398	0.327733	0.275715	0.476532	0.46957	0.463436	0.493373	0.562165	0.35266
57.231	0.319149	0.469509	0.514359	0.369578	0.416965	0.329804	0.278119	0.478488	0.471668	0.465198	0.494845	0.564545	0.354787
57.253	0.321809	0.471877	0.516273	0.371988	0.418756	0.331876	0.280256	0.480443	0.473767	0.46696	0.496318	0.566924	0.357447
57.274	0.323936	0.473653	0.518188	0.374398	0.420322	0.333947	0.282661	0.482399	0.475866	0.468722	0.497791	0.569304	0.360106
57.296	0.326596	0.476021	0.520102	0.376807	0.422113	0.336018	0.284798	0.483703	0.47744	0.470485	0.499264	0.571089	0.362234
57.318	0.328723	0.47839	0.522017	0.378916	0.423679	0.33786	0.286936	0.485658	0.479538	0.472247	0.499264	0.573468	0.364894
57.34	0.331383	0.480166	0.523931	0.381325	0.42547	0.339931	0.28934	0.487614	0.481637	0.47489	0.500736	0.575848	0.367021
57.361	0.333511	0.482534	0.525846	0.383735	0.427037	0.342002	0.291477	0.488918	0.483736	0.476652	0.502209	0.578227	0.369681
57.383	0.335638	0.484902	0.52776	0.386145	0.428827	0.343843	0.293615	0.490874	0.485834	0.478414	0.503682	0.580012	0.371809
57.405	0.338298	0.486679	0.529675	0.388554	0.430394	0.345915	0.295752	0.492829	0.487933	0.480176	0.505155	0.582391	0.374468
57.427	0.340426	0.489047	0.531589	0.390964	0.431961	0.347986	0.297889	0.494785	0.490031	0.481938	0.506627	0.584771	0.376596
57.448	0.343085	0.491415	0.533504	0.393072	0.433751	0.349827	0.300294	0.496089	0.49213	0.4837	0.506627	0.586556	0.379255
57.47	0.345213	0.493191	0.535418	0.395482	0.435318	0.351899	0.302431	0.498044	0.494229	0.485463	0.5081	0.588935	0.381915
57.492	0.347872	0.49556	0.537332	0.397892	0.436885	0.35397	0.304569	0.5	0.496327	0.487225	0.509573	0.591315	0.384043
57.514	0.35	0.497928	0.539247	0.4	0.438675	0.355811	0.306706	0.501304	0.498426	0.488987	0.511046	0.593099	0.386702
57.535	0.35266	0.499704	0.541161	0.40241	0.440242	0.357883	0.308843	0.503259	0.500525	0.490749	0.512518	0.595479	0.38883
57.557	0.354787	0.502072	0.543076	0.404819	0.441808	0.359724	0.31098	0.505215	0.502623	0.492511	0.512518	0.597858	0.391489
57.579	0.357447	0.50444	0.54499	0.406928	0.443375	0.361795	0.313118	0.506519	0.504722	0.494273	0.513991	0.599643	0.394149
57.601	0.360106	0.506217	0.546905	0.409337	0.444942	0.363636	0.315255	0.508475	0.506821	0.496035	0.515464	0.602023	0.396277
57.622	0.362234	0.508585	0.548819	0.411446	0.446732	0.365708	0.317392	0.51043	0.508395	0.497797	0.516937	0.603807	0.398936
57.644	0.364894	0.510953	0.550734	0.413855	0.448299	0.367549	0.31953	0.512386	0.510493	0.500441	0.518409	0.606187	0.401596
57.666	0.367021	0.512729	0.552648	0.415964	0.449866	0.36962	0.3214	0.51369	0.512592	0.502203	0.518409	0.608566	0.403723
57.688	0.369681	0.515098	0.554563	0.418373	0.451432	0.371461	0.323537	0.515645	0.51469	0.503965	0.519882	0.610351	0.406383
57.709	0.371809	0.516874	0.556477	0.420482	0.452999	0.373533	0.325675	0.517601	0.516789	0.505727	0.521355	0.612731	0.408511
57.731	0.374468	0.519242	0.558392	0.42259	0.454566	0.375374	0.327812	0.518905	0.518888	0.507489	0.522828	0.614515	0.41117
57.753	0.376596	0.52161	0.560306	0.425	0.456132	0.377445	0.329682	0.52086	0.520986	0.509251	0.5243	0.616895	0.41383
57.775	0.379255	0.523387	0.562221	0.427108	0.457699	0.379287	0.331819	0.522816	0.523085	0.511013	0.5243	0.618679	0.415957
57.796	0.381915	0.525755	0.564135	0.429217	0.459266	0.381128	0.333957	0.52412	0.524659	0.512775	0.525773	0.621059	0.418617
57.818	0.384043	0.527531	0.56605	0.431627	0.460833	0.383199	0.335827	0.526076	0.526758	0.514537	0.527246	0.622844	0.421277
57.84	0.386702	0.529899	0.567964	0.433735	0.462399	0.38504	0.337964	0.528031	0.528856	0.5163	0.528719	0.625223	0.423404
57.862	0.38883	0.531676	0.569879	0.435843	0.463966	0.387112	0.339834	0.529987	0.530955	0.518062	0.528719	0.627008	0.426064
57.883	0.391489	0.534044	0.571793	0.437952	0.465309	0.388953	0.341972	0.531291	0.533054	0.519824	0.530191	0.629387	0.428723
57.905	0.394149	0.53582	0.573708	0.44006	0.466876	0.391024	0.343842	0.533246	0.535152	0.521586	0.531664	0.631172	0.430851
57.927	0.396277	0.538188	0.575622	0.44247	0.468442	0.392865	0.345979	0.535202	0.536726	0.523348	0.533137	0.633551	0.433511
57.949	0.398936	0.540557	0.577537	0.444578	0.470009	0.394937	0.347849	0.536506	0.538825	0.52511	0.533137	0.635336	0.43617
57.97	0.401596	0.542333	0.579451	0.446687	0.471352	0.396778	0.349719	0.538462	0.540923	0.526872	0.53461	0.637121	0.43883
57.992	0.403723	0.544701	0.581366	0.448795	0.472919	0.398849	0.351857	0.540417	0.543022	0.528634	0.536082	0.6395	0.440957
58.014	0.406383	0.546477	0.58328	0.450904	0.474485	0.40069	0.353727	0.541721	0.545121	0.530396	0.537555	0.641285	0.443617
58.036	0.408511	0.548253	0.585195	0.453012	0.475828	0.402762	0.355597	0.543677	0.546695	0.532159	0.539028	0.643664	0.446277
58.057	0.41117	0.550622	0.587109	0.45512	0.477395	0.404833	0.357467	0.545632	0.548793	0.533921	0.539028	0.645449	0.448404
58.079	0.41383	0.552398	0.589024	0.457229	0.478738	0.406674	0.359605	0.546936	0.550892	0.535683	0.540501	0.647234	0.451064
58.101	0.415957	0.554766	0.590938	0.459036	0.480304	0.408746	0.361475	0.548892	0.552991	0.537445	0.541973	0.649613	0.453723
58.123	0.418617	0.556542	0.592853	0.461145	0.481647	0.410587	0.363345	0.550847	0.554565	0.539207	0.543446	0.651398	0.456383
58.144	0.421277	0.558911	0.594767	0.463253	0.48299	0.412658	0.365215	0.552151	0.556663	0.540969	0.543446	0.653183	0.458511
58.166	0.423404	0.560687	0.596682	0.465361	0.484557	0.414499	0.367085	0.554107	0.558762	0.542731	0.544919	0.654967	0.46117
58.188	0.426064	0.563055	0.598596	0.46747	0.4859	0.416571	0.368955	0.556063	0.56086	0.544493	0.546392	0.657347	0.46383
58.209	0.428723	0.564831	0.600511	0.469277	0.487243	0.418412	0.370826	0.557366	0.562434	0.546256	0.547865	0.659131	0.465957
58.231	0.430851	0.566607	0.601787	0.471386	0.488585	0.420483	0.372696	0.559322	0.564533	0.548018	0.549337	0.660916	0.468617
58.253	0.433511	0.568976	0.603701	0.473494	0.490152	0.422555	0.374566	0.561278	0.566632	0.54978	0.549337	0.663296	0.471277
58.275	0.43617	0.570752	0.605616	0.475602	0.491495	0.424396	0.376169	0.562581	0.56873	0.551542	0.55081	0.66508	0.473936
58.296	0.43883	0.57312	0.60753	0.47741	0.492838	0.426467	0.378039	0.564537	0.570304	0.553304	0.552283	0.666865	0.476064
58.318	0.440957	0.574896	0.609445	0.479518	0.494181	0.428308	0.379909	0.566493	0.572403	0.555066	0.553756	0.66865	0.478723
58.34	0.443617	0.576673	0.611359	0.481325	0.495524	0.43038	0.381779	0.567797	0.574502	0.556828	0.553756	0.670434	0.481383
58.362	0.446277	0.579041	0.613274	0.483434	0.496867	0.432221	0.383649	0.569752	0.576076	0.55859	0.555228	0.672814	0.484043
58.383	0.448404	0.580817	0.615188	0.485241	0.498209	0.434292	0.385252	0.571056	0.578174	0.560352	0.556701	0.674598	0.48617
58.405	0.451064	0.582593	0.617103	0.487349	0.499552	0.436364	0.387123	0.573012	0.580273	0.562115	0.558174	0.676383	0.48883
58.427	0.453723	0.584962	0.619017	0.489157	0.500895	0.438205	0.388993	0.574967	0.581847	0.563877	0.559647	0.678168	0.491489
58.449	0.456383	0.586738	0.620932	0.491265	0.502238	0.440276	0.390596	0.576271	0.583945	0.564758	0.561119	0.679952	0.494149
58.47	0.458511	0.588514	0.622846	0.493072	0.503581	0.442117	0.392466	0.578227	0.586044	0.56652	0.561119	0.681737	0.496277
58.492	0.46117	0.59029	0.624761	0.495181	0.504924	0.444189	0.394336	0.580183	0.587618	0.568282	0.562592	0.683522	0.498936
58.514	0.46383	0.592658	0.626037	0.496988	0.506043	0.44603	0.395939	0.581486	0.589717	0.570044	0.564065	0.685306	0.501596
58.536	0.465957	0.594435	0.627951	0.498795	0.507386	0.448101	0.397809	0.583442	0.591291	0.571806	0.565538	0.687091	0.504255
58.557	0.468617	0.596211	0.629866	0.500904	0.508729	0.449942	0.399412	0.585398	0.593389	0.573568	0.56701	0.688876	0.506383
58.579	0.471277	0.598579	0.63178	0.502711	0.510072	0.452014	0.401282	0.586701	0.595488	0.57533	0.56701	0.691255	0.509043
58.601	0.473936	0.600355	0.633695	0.504518	0.511191	0.453855	0.402885	0.588657	0.597062	0.577093	0.568483	0.69304	0.511702
58.623	0.476064	0.602131	0.635609	0.506325	0.512534	0.455926	0.404756	0.589961	0.599161	0.578855	0.569956	0.694825	0.514362
58.644	0.478723	0.603908	0.637524	0.508434	0.513876	0.457768	0.406359	0.591917	0.600735	0.580617	0.571429	0.696609	0.516489
58.666	0.481383	0.606276	0.639438	0.510241	0.514996	0.459839	0.408229	0.593872	0.602833	0.582379	0.572901	0.698394	0.519149
58.688	0.484043	0.608052	0.641353	0.512048	0.516338	0.46168	0.409832	0.595176	0.604932	0.58326	0.574374	0.699584	0.521809
58.71	0.48617	0.609828	0.642629	0.513855	0.517457	0.463751	0.411702	0.597132	0.606506	0.585022	0.574374	0.701368	0.524468
58.731	0.48883	0.611604	0.644544	0.515663	0.5188	0.465593	0.413305	0.598435	0.608604	0.586784	0.575847	0.703153	0.526596
58.753	0.491489	0.613381	0.646458	0.51747	0.520143	0.467664	0.414908	0.600391	0.610178	0.588546	0.57732	0.704938	0.529255
58.775	0.494149	0.615749	0.648373	0.519277	0.521262	0.469505	0.416778	0.602347	0.612277	0.590308	0.578792	0.706722	0.531915
58.797	0.496277	0.617525	0.650287	0.521084	0.522605	0.471346	0.418381	0.603651	0.613851	0.59207	0.580265	0.708507	0.534043
58.818	0.498936	0.619301	0.652202	0.522892	0.523724	0.473418	0.419984	0.605606	0.61595	0.593833	0.580265	0.710291	0.536702
58.84	0.501596	0.621078	0.654116	0.524699	0.525067	0.475259	0.421854	0.60691	0.617524	0.594714	0.581738	0.712076	0.539362
58.862	0.504255	0.622854	0.656031	0.526506	0.526186	0.4771	0.423457	0.608866	0.619622	0.596476	0.583211	0.713861	0.541489
58.884	0.506383	0.625222	0.657307	0.528313	0.527305	0.479171	0.42506	0.610821	0.621196	0.598238	0.584683	0.715051	0.544149
58.905	0.509043	0.626998	0.659221	0.53012	0.528648	0.481013	0.42693	0.612125	0.623295	0.6	0.586156	0.716835	0.546809
58.927	0.511702	0.628774	0.661136	0.531928	0.529767	0.482854	0.428533	0.614081	0.624869	0.601762	0.587629	0.71862	0.548936
58.949	0.514362	0.630551	0.66305	0.533434	0.53111	0.484695	0.430136	0.615385	0.626967	0.603524	0.587629	0.720405	0.551596
58.971	0.516489	0.632327	0.664965	0.535241	0.532229	0.486766	0.431739	0.61734	0.628541	0.604405	0.589102	0.721594	0.554255
58.992	0.519149	0.634103	0.666879	0.537048	0.533348	0.488608	0.433342	0.618644	0.63064	0.606167	0.590574	0.723379	0.556383
59.014	0.521809	0.636471	0.668156	0.538855	0.534691	0.490449	0.435212	0.6206	0.632214	0.60793	0.592047	0.725164	0.559043
59.036	0.524468	0.638247	0.67007	0.540361	0.53581	0.49229	0.436815	0.622555	0.633788	0.609692	0.59352	0.726948	0.561702
59.058	0.526596	0.640024	0.671985	0.542169	0.536929	0.494131	0.438418	0.623859	0.635887	0.611454	0.594993	0.728138	0.56383
59.079	0.529255	0.6418	0.673899	0.543976	0.538048	0.495972	0.440021	0.625815	0.637461	0.612335	0.594993	0.729923	0.566489
59.101	0.531915	0.643576	0.675814	0.545482	0.539391	0.497814	0.441624	0.627119	0.639559	0.614097	0.596465	0.731707	0.568617
59.123	0.534043	0.645352	0.677728	0.547289	0.54051	0.499655	0.443227	0.629074	0.641133	0.615859	0.597938	0.732897	0.571277
59.145	0.536702	0.647128	0.679004	0.549096	0.541629	0.501496	0.44483	0.630378	0.642707	0.617621	0.599411	0.734682	0.573404
59.166	0.539362	0.648905	0.680919	0.550602	0.542748	0.503337	0.446433	0.632334	0.644806	0.619383	0.600884	0.735872	0.576064
59.188	0.541489	0.651273	0.682833	0.55241	0.544091	0.505178	0.448036	0.633638	0.64638	0.620264	0.600884	0.737656	0.578723
59.21	0.544149	0.653049	0.684748	0.553916	0.54521	0.50702	0.449639	0.635593	0.648478	0.622026	0.602356	0.738846	0.580851
59.232	0.546809	0.654825	0.686662	0.555723	0.546329	0.508631	0.451242	0.636897	0.650052	0.623789	0.603829	0.740631	0.583511
59.253	0.548936	0.656602	0.687939	0.557229	0.547449	0.510472	0.452845	0.638853	0.651626	0.625551	0.605302	0.742415	0.585638
59.275	0.551596	0.658378	0.689853	0.559036	0.548568	0.512313	0.454448	0.640156	0.653725	0.626432	0.605302	0.743605	0.587766
59.297	0.554255	0.660154	0.691768	0.560542	0.54991	0.514154	0.456051	0.642112	0.655299	0.628194	0.606775	0.744795	0.590426
59.319	0.556383	0.66193	0.693682	0.562048	0.55103	0.515765	0.457654	0.643416	0.656873	0.629956	0.608247	0.746579	0.592553
59.34	0.559043	0.663706	0.694959	0.563855	0.552149	0.517606	0.459257	0.645372	0.658972	0.631718	0.60972	0.747769	0.595213
59.362	0.561702	0.665483	0.696873	0.565361	0.553268	0.519448	0.46086	0.646675	0.660546	0.632599	0.60972	0.749554	0.59734
59.384	0.56383	0.667259	0.698787	0.567169	0.554387	0.521059	0.462463	0.648631	0.66212	0.634361	0.611193	0.750744	0.6
59.406	0.566489	0.669035	0.700702	0.568675	0.55573	0.5229	0.464066	0.649935	0.664218	0.636123	0.612666	0.752528	0.602128
59.427	0.568617	0.670811	0.702616	0.570181	0.556849	0.524511	0.465669	0.65189	0.665792	0.637885	0.614138	0.753718	0.604255
59.449	0.571277	0.672587	0.703893	0.571988	0.557968	0.526352	0.467272	0.653194	0.667366	0.638767	0.614138	0.754908	0.606915
59.471	0.573404	0.674364	0.705807	0.573494	0.559087	0.527963	0.468875	0.65515	0.66894	0.640529	0.615611	0.756692	0.609043
59.493	0.576064	0.67614	0.707722	0.575	0.560206	0.529804	0.470478	0.656454	0.671039	0.642291	0.617084	0.757882	0.611702
59.514	0.578723	0.677916	0.708998	0.576506	0.561325	0.531415	0.472081	0.658409	0.672613	0.643172	0.618557	0.759072	0.61383
59.536	0.580851	0.679692	0.710913	0.578313	0.562444	0.533257	0.473684	0.659713	0.674187	0.644934	0.618557	0.760857	0.615957
59.558	0.583511	0.681468	0.712827	0.579819	0.563563	0.534868	0.47502	0.661669	0.676285	0.646696	0.620029	0.762046	0.618085
59.58	0.585638	0.683245	0.714742	0.581325	0.564906	0.536709	0.476623	0.662973	0.677859	0.647577	0.621502	0.763236	0.620745
59.601	0.587766	0.685021	0.716018	0.582831	0.566025	0.53832	0.478226	0.664928	0.679433	0.649339	0.622975	0.764426	0.622872
59.623	0.590426	0.686797	0.717932	0.584337	0.567144	0.540161	0.479829	0.666232	0.681007	0.651101	0.622975	0.766211	0.625
59.645	0.592553	0.688573	0.719847	0.586145	0.568263	0.541772	0.481432	0.667536	0.682581	0.652863	0.624448	0.7674	0.627128
59.667	0.595213	0.690349	0.721123	0.587651	0.569382	0.543383	0.483035	0.669492	0.68468	0.653744	0.62592	0.76859	0.629787
59.688	0.59734	0.692126	0.723038	0.589157	0.570501	0.545224	0.484638	0.670795	0.686254	0.655507	0.62592	0.76978	0.631915
59.71	0.6	0.693902	0.724952	0.590663	0.57162	0.546835	0.485974	0.672751	0.687828	0.657269	0.627393	0.77097	0.634043
59.732	0.602128	0.695678	0.726228	0.592169	0.572739	0.548677	0.487577	0.674055	0.689402	0.65815	0.628866	0.772754	0.63617
59.754	0.604255	0.697454	0.728143	0.593675	0.573859	0.550288	0.48918	0.67601	0.691501	0.659912	0.630339	0.773944	0.638298
59.775	0.606915	0.69923	0.730057	0.595181	0.574978	0.552129	0.490783	0.677314	0.693075	0.660793	0.630339	0.775134	0.640426
59.797	0.609043	0.701007	0.731334	0.596687	0.576097	0.55374	0.492386	0.678618	0.694648	0.662555	0.631811	0.776324	0.642553
59.819	0.611702	0.702783	0.733248	0.598193	0.577216	0.555351	0.493722	0.680574	0.696222	0.664317	0.633284	0.777513	0.645213
59.841	0.61383	0.704559	0.735163	0.599699	0.578335	0.557192	0.495325	0.681877	0.697796	0.665198	0.634757	0.778703	0.64734
59.862	0.615957	0.706335	0.736439	0.601205	0.579678	0.558803	0.496928	0.683833	0.699895	0.66696	0.634757	0.779893	0.649468
59.884	0.618085	0.708111	0.738354	0.602711	0.580797	0.560644	0.498531	0.685137	0.701469	0.668722	0.63623	0.781083	0.651596
59.906	0.620745	0.709295	0.73963	0.604217	0.581916	0.562255	0.500134	0.686441	0.703043	0.669604	0.637703	0.782272	0.653723
59.928	0.622872	0.711072	0.741544	0.605723	0.583035	0.563867	0.501469	0.688396	0.704617	0.671366	0.639175	0.783462	0.655851
59.949	0.625	0.712848	0.743459	0.607229	0.584154	0.565708	0.503072	0.6897	0.706191	0.673128	0.639175	0.784652	0.657979
59.971	0.627128	0.714624	0.744735	0.608735	0.585273	0.567319	0.504675	0.691656	0.707765	0.674009	0.640648	0.785842	0.660106
59.993	0.629787	0.7164	0.74665	0.610241	0.586392	0.56916	0.506278	0.69296	0.709864	0.675771	0.642121	0.787032	0.662234
60.014	0.631915	0.718176	0.747926	0.611747	0.587511	0.570771	0.507614	0.694263	0.711438	0.676652	0.643594	0.788221	0.664362
60.036	0.634043	0.719361	0.74984	0.613253	0.58863	0.572382	0.509217	0.696219	0.713012	0.678414	0.643594	0.789411	0.665957
60.058	0.63617	0.721137	0.751117	0.614759	0.589749	0.574223	0.51082	0.697523	0.714586	0.679295	0.645066	0.790601	0.668085
60.08	0.638298	0.722913	0.753031	0.616265	0.590868	0.575834	0.512423	0.698827	0.716159	0.681057	0.646539	0.791791	0.670213
60.101	0.640426	0.724689	0.754308	0.617771	0.591987	0.577675	0.514026	0.700782	0.717733	0.682819	0.648012	0.79298	0.67234
60.123	0.642553	0.726465	0.756222	0.619277	0.593107	0.579287	0.515362	0.702086	0.719832	0.6837	0.649485	0.79417	0.674468
60.145	0.645213	0.727649	0.757498	0.620783	0.594226	0.580898	0.516965	0.70339	0.721406	0.685463	0.649485	0.79536	0.676596
60.167	0.64734	0.729426	0.759413	0.622289	0.595345	0.582739	0.518568	0.705346	0.72298	0.686344	0.650957	0.79655	0.678191
60.188	0.649468	0.731202	0.760689	0.623795	0.596464	0.58435	0.520171	0.706649	0.724554	0.688106	0.65243	0.797739	0.680319
60.21	0.651596	0.732386	0.762604	0.625301	0.597583	0.586191	0.521774	0.707953	0.726128	0.688987	0.653903	0.798929	0.682447
60.232	0.653723	0.734162	0.76388	0.626807	0.598702	0.587802	0.52311	0.709909	0.727702	0.690749	0.655376	0.800119	0.684574
60.254	0.655851	0.735938	0.765795	0.628313	0.599821	0.589413	0.524713	0.711213	0.729276	0.69163	0.656848	0.800714	0.68617
60.275	0.657979	0.737715	0.767071	0.629819	0.60094	0.591254	0.526316	0.712516	0.73085	0.693392	0.658321	0.801904	0.688298
60.297	0.660106	0.738899	0.768347	0.631325	0.602059	0.592865	0.527919	0.71382	0.732949	0.695154	0.658321	0.803093	0.690426
60.319	0.662234	0.740675	0.770262	0.632831	0.603178	0.594707	0.529522	0.715776	0.734523	0.696035	0.659794	0.804283	0.692553
60.341	0.664362	0.741859	0.771538	0.634337	0.604297	0.596318	0.531125	0.71708	0.736097	0.697797	0.661267	0.805473	0.694149
60.362	0.665957	0.743635	0.773452	0.635843	0.605416	0.597929	0.532461	0.718383	0.737671	0.698678	0.662739	0.806663	0.696277
60.384	0.668085	0.745411	0.774729	0.637349	0.606535	0.59977	0.534064	0.719687	0.739244	0.700441	0.664212	0.807852	0.697872
60.406	0.670213	0.746596	0.776005	0.638855	0.607654	0.601381	0.535667	0.721643	0.740818	0.701322	0.665685	0.808447	0.7
60.428	0.67234	0.748372	0.77792	0.640361	0.608774	0.603222	0.53727	0.722947	0.742392	0.703084	0.667158	0.809637	0.702128
60.449	0.674468	0.749556	0.779196	0.641867	0.609893	0.604833	0.538873	0.72425	0.743966	0.703965	0.66863	0.810827	0.703723
60.471	0.676596	0.751332	0.780472	0.643373	0.611012	0.606444	0.540476	0.725554	0.74554	0.705727	0.670103	0.812017	0.705851
60.493	0.678191	0.753108	0.782387	0.64488	0.612131	0.608285	0.542079	0.72751	0.747114	0.706608	0.671576	0.813206	0.707447
60.515	0.680319	0.754292	0.783663	0.646386	0.61325	0.609896	0.543414	0.728814	0.748688	0.70837	0.673049	0.814396	0.709574
60.536	0.682447	0.756069	0.784939	0.647892	0.614369	0.611507	0.545017	0.730117	0.750787	0.709251	0.673049	0.814991	0.71117
60.558	0.684574	0.757253	0.786854	0.649398	0.615712	0.613349	0.54662	0.731421	0.752361	0.710132	0.674521	0.816181	0.713298
60.58	0.68617	0.759029	0.78813	0.650904	0.616831	0.61496	0.548223	0.733377	0.753935	0.711894	0.675994	0.817371	0.714894
60.602	0.688298	0.760213	0.789407	0.65241	0.61795	0.616801	0.549826	0.734681	0.755509	0.712775	0.677467	0.81856	0.716489
60.623	0.690426	0.761989	0.790683	0.653916	0.619069	0.618412	0.551429	0.735984	0.757083	0.714537	0.67894	0.81975	0.718617
60.645	0.692553	0.763173	0.792597	0.655422	0.620188	0.620023	0.553032	0.737288	0.758657	0.715419	0.680412	0.820345	0.720213
60.667	0.694149	0.76495	0.793874	0.656928	0.621307	0.621864	0.554635	0.738592	0.760231	0.717181	0.681885	0.821535	0.72234
60.689	0.696277	0.766134	0.79515	0.658434	0.62265	0.623475	0.556238	0.740548	0.761805	0.718062	0.683358	0.822725	0.723936
60.71	0.697872	0.767318	0.796426	0.65994	0.623769	0.625316	0.557841	0.741851	0.763379	0.718943	0.684831	0.823914	0.725532
60.732	0.7	0.769094	0.797703	0.661446	0.624888	0.626928	0.559444	0.743155	0.764953	0.720705	0.686303	0.824509	0.72766
60.754	0.702128	0.770278	0.799617	0.662952	0.626007	0.628539	0.561047	0.744459	0.766527	0.721586	0.687776	0.825699	0.729255
60.776	0.703723	0.772054	0.800893	0.664458	0.627126	0.63038	0.56265	0.745763	0.768101	0.723348	0.690722	0.826889	0.730851
60.797	0.705851	0.773239	0.80217	0.665964	0.628469	0.631991	0.564253	0.747066	0.769675	0.724229	0.692194	0.828079	0.732979
60.819	0.707447	0.774423	0.803446	0.66747	0.629588	0.633602	0.565856	0.749022	0.771249	0.72511	0.693667	0.828673	0.734574
60.841	0.709574	0.776199	0.804722	0.668976	0.630707	0.635443	0.567459	0.750326	0.772823	0.726872	0.69514	0.829863	0.73617
60.863	0.71117	0.777383	0.805999	0.670482	0.63205	0.637054	0.569062	0.75163	0.774397	0.727753	0.696613	0.831053	0.737766
60.884	0.713298	0.779159	0.807913	0.671988	0.633169	0.638665	0.570665	0.752934	0.775971	0.729515	0.698085	0.832243	0.739362
60.906	0.714894	0.780343	0.80919	0.673494	0.634288	0.640506	0.572268	0.754237	0.777545	0.730396	0.699558	0.832838	0.741489
60.928	0.716489	0.781528	0.810466	0.675	0.635631	0.642117	0.573871	0.755541	0.779119	0.731278	0.701031	0.834027	0.743085
60.95	0.718617	0.783304	0.811742	0.676506	0.63675	0.643728	0.575474	0.756845	0.780693	0.73304	0.702504	0.835217	0.744681
60.971	0.720213	0.784488	0.813019	0.678012	0.638093	0.64557	0.577077	0.758801	0.782267	0.733921	0.703976	0.836407	0.746277
60.993	0.72234	0.785672	0.814295	0.679819	0.639212	0.647181	0.57868	0.760104	0.783841	0.734802	0.705449	0.837002	0.747872
61.015	0.723936	0.786856	0.815571	0.681325	0.640331	0.648792	0.580283	0.761408	0.785414	0.736564	0.706922	0.838192	0.749468
61.037	0.725532	0.788632	0.816847	0.682831	0.641674	0.650633	0.581886	0.762712	0.786988	0.737445	0.708395	0.839381	0.751064
61.058	0.72766	0.789816	0.818124	0.684337	0.642793	0.652244	0.583489	0.764016	0.788562	0.738326	0.709867	0.840571	0.75266
61.08	0.729255	0.791001	0.8194	0.685843	0.644136	0.653855	0.585092	0.765319	0.790136	0.740088	0.712813	0.841166	0.754255
61.102	0.730851	0.792777	0.820676	0.687349	0.645479	0.655696	0.586695	0.766623	0.79171	0.740969	0.714286	0.842356	0.755851
61.124	0.732979	0.793961	0.821953	0.688855	0.646598	0.657307	0.588565	0.767927	0.793284	0.74185	0.715758	0.843546	0.757447
61.145	0.734574	0.795145	0.823229	0.690361	0.647941	0.658918	0.590168	0.769231	0.794858	0.743612	0.717231	0.844735	0.759043
61.167	0.73617	0.796329	0.824505	0.692169	0.64906	0.660529	0.591771	0.770535	0.796432	0.744493	0.718704	0.84533	0.760638
61.189	0.737766	0.798105	0.825782	0.693675	0.650403	0.66214	0.593374	0.771838	0.798006	0.745374	0.720177	0.84652	0.762234
61.211	0.739362	0.79929	0.827058	0.695181	0.651746	0.663982	0.594977	0.773142	0.799056	0.747137	0.721649	0.84771	0.76383
61.232	0.741489	0.800474	0.828334	0.696687	0.652865	0.665593	0.59658	0.774446	0.80063	0.748018	0.723122	0.848305	0.765426
61.254	0.743085	0.801658	0.829611	0.698193	0.654208	0.667204	0.59845	0.77575	0.802204	0.748899	0.724595	0.849494	0.767021
61.276	0.744681	0.803434	0.830887	0.699699	0.655551	0.668815	0.600053	0.777705	0.803778	0.750661	0.726068	0.850684	0.768617
61.298	0.746277	0.804618	0.832163	0.701506	0.65667	0.670426	0.601656	0.779009	0.805352	0.751542	0.727541	0.851874	0.770213
61.319	0.747872	0.805802	0.83344	0.703012	0.658013	0.672037	0.603259	0.780313	0.806925	0.752423	0.729013	0.852469	0.771809
61.341	0.749468	0.806986	0.834716	0.704518	0.659355	0.673648	0.604862	0.781617	0.808499	0.753304	0.730486	0.853659	0.773404
61.363	0.751064	0.808171	0.835992	0.706024	0.660698	0.675259	0.606733	0.78292	0.810073	0.755066	0.733432	0.854848	0.774468
61.385	0.75266	0.809947	0.837269	0.70753	0.662041	0.67687	0.608336	0.784224	0.811123	0.755947	0.734904	0.855443	0.776064
61.406	0.754255	0.811131	0.838545	0.709337	0.663384	0.678481	0.609939	0.785528	0.812697	0.756828	0.736377	0.856633	0.77766
61.428	0.755851	0.812315	0.839821	0.710843	0.664503	0.680092	0.611542	0.786832	0.814271	0.757709	0.73785	0.857823	0.779255
61.45	0.757447	0.813499	0.841098	0.712349	0.665846	0.681703	0.613412	0.788136	0.815845	0.759471	0.739323	0.859012	0.780319
61.472	0.759043	0.814683	0.841736	0.713855	0.667189	0.683314	0.615015	0.789439	0.817419	0.760352	0.740795	0.859607	0.781915
61.493	0.760638	0.816459	0.843012	0.715361	0.668532	0.684925	0.616618	0.790743	0.818468	0.761233	0.742268	0.860797	0.783511
61.515	0.762234	0.817644	0.844288	0.717169	0.669875	0.686536	0.618221	0.792047	0.820042	0.762115	0.743741	0.861987	0.785106
61.537	0.76383	0.818828	0.845565	0.718675	0.671218	0.688147	0.620091	0.792699	0.821616	0.763877	0.745214	0.863177	0.78617
61.559	0.765426	0.820012	0.846841	0.720181	0.67256	0.689758	0.621694	0.794003	0.82319	0.764758	0.746686	0.863772	0.787766
61.58	0.767021	0.821196	0.848117	0.721687	0.673903	0.691369	0.623297	0.795306	0.824239	0.765639	0.746686	0.864961	0.78883
61.602	0.768617	0.822972	0.849394	0.723494	0.675246	0.69298	0.625167	0.79661	0.825813	0.76652	0.748159	0.866151	0.790426
61.624	0.770213	0.824156	0.850032	0.725	0.676589	0.694591	0.62677	0.797914	0.827387	0.768282	0.749632	0.866746	0.792021
61.646	0.771809	0.82534	0.851308	0.726506	0.677932	0.695972	0.628373	0.799218	0.828961	0.769163	0.751105	0.867936	0.793085
61.667	0.773404	0.826525	0.852585	0.728012	0.679275	0.697583	0.629976	0.800522	0.83001	0.770044	0.752577	0.869126	0.794681
61.689	0.774468	0.827709	0.853861	0.729819	0.680618	0.699194	0.631846	0.801825	0.831584	0.770925	0.75405	0.86972	0.795745
61.711	0.776064	0.828893	0.855137	0.731325	0.681961	0.700806	0.633449	0.803129	0.833158	0.772687	0.755523	0.87091	0.79734
61.733	0.77766	0.830077	0.855775	0.732831	0.683303	0.702186	0.635052	0.804433	0.834208	0.773568	0.756996	0.8721	0.798404
61.754	0.779255	0.831853	0.857052	0.734639	0.684646	0.703797	0.636922	0.805737	0.835782	0.774449	0.758468	0.87329	0.8
61.776	0.780319	0.833037	0.858328	0.736145	0.686213	0.705409	0.638525	0.80704	0.837356	0.77533	0.759941	0.873885	0.801064
61.798	0.781915	0.834221	0.859604	0.737651	0.687556	0.70702	0.640128	0.808344	0.838405	0.776211	0.759941	0.875074	0.80266
61.819	0.783511	0.835406	0.860881	0.739157	0.688899	0.7084	0.641998	0.808996	0.839979	0.777974	0.761414	0.876264	0.803723
61.841	0.785106	0.83659	0.861519	0.740964	0.690242	0.710012	0.643601	0.8103	0.841553	0.778855	0.762887	0.876859	0.805319
61.863	0.78617	0.837774	0.862795	0.74247	0.691585	0.711392	0.645204	0.811604	0.842602	0.779736	0.764359	0.878049	0.806383
61.885	0.787766	0.838958	0.864071	0.743976	0.692927	0.713003	0.647075	0.812907	0.844176	0.780617	0.765832	0.879239	0.807447
61.906	0.78883	0.840142	0.865348	0.745783	0.69427	0.714384	0.648678	0.814211	0.845226	0.781498	0.765832	0.880428	0.809043
61.928	0.790426	0.841326	0.865986	0.747289	0.695837	0.715995	0.650281	0.815515	0.8468	0.782379	0.767305	0.881023	0.810106
61.95	0.792021	0.84251	0.867262	0.748795	0.69718	0.717606	0.651884	0.816819	0.848374	0.784141	0.768778	0.882213	0.81117
61.972	0.793085	0.844287	0.868539	0.750602	0.698523	0.718987	0.653754	0.817471	0.849423	0.785022	0.77025	0.883403	0.812766
61.993	0.794681	0.845471	0.869815	0.752108	0.699866	0.720368	0.655357	0.818774	0.850997	0.785903	0.77025	0.883998	0.81383
62.015	0.795745	0.846655	0.870453	0.753614	0.701209	0.721979	0.65696	0.820078	0.852046	0.786784	0.771723	0.885187	0.814894
62.037	0.79734	0.847839	0.871729	0.755422	0.702775	0.72336	0.65883	0.821382	0.85362	0.787665	0.773196	0.886377	0.816489
62.059	0.798404	0.849023	0.873006	0.756928	0.704118	0.724971	0.660433	0.822686	0.854669	0.789427	0.773196	0.887567	0.817553
62.08	0.8	0.850207	0.873644	0.758434	0.705461	0.726352	0.662036	0.82399	0.856243	0.790308	0.774669	0.888162	0.818617
62.102	0.801064	0.851391	0.87492	0.760241	0.706804	0.727733	0.663906	0.824641	0.857293	0.791189	0.776141	0.889352	0.819681
62.124	0.80266	0.852575	0.876197	0.761747	0.708147	0.729344	0.665509	0.825945	0.858867	0.79207	0.776141	0.890541	0.820745
62.146	0.803723	0.85376	0.876835	0.763253	0.70949	0.730725	0.667112	0.827249	0.859916	0.792952	0.777614	0.891136	0.82234
62.167	0.805319	0.854944	0.878111	0.76506	0.711056	0.732106	0.668982	0.828553	0.86149	0.793833	0.779087	0.892326	0.823404
62.189	0.806383	0.856128	0.879387	0.766566	0.712399	0.733487	0.670585	0.829857	0.862539	0.794714	0.779087	0.893516	0.824468
62.211	0.807447	0.857312	0.880026	0.768072	0.713742	0.735098	0.672188	0.830508	0.864113	0.796476	0.78056	0.894706	0.825532
62.233	0.809043	0.858496	0.881302	0.76988	0.715085	0.736479	0.674058	0.831812	0.865163	0.797357	0.782032	0.8953	0.826596
62.254	0.810106	0.85968	0.882578	0.771386	0.716428	0.73786	0.675661	0.833116	0.866737	0.798238	0.782032	0.89649	0.82766
62.276	0.81117	0.860864	0.883216	0.772892	0.717995	0.739241	0.677264	0.83442	0.867786	0.799119	0.783505	0.89768	0.828723
62.298	0.812766	0.862049	0.884493	0.774699	0.719338	0.740621	0.678867	0.835072	0.868835	0.8	0.783505	0.898275	0.829787
62.32	0.81383	0.863233	0.885131	0.776205	0.72068	0.742002	0.680737	0.836375	0.870409	0.800881	0.784978	0.899465	0.830851
62.341	0.814894	0.864417	0.886407	0.777711	0.722023	0.743383	0.68234	0.837679	0.871459	0.801762	0.786451	0.900654	0.831915
62.363	0.816489	0.865601	0.887683	0.779518	0.723366	0.744764	0.683943	0.838983	0.873033	0.803524	0.786451	0.901249	0.832979
62.385	0.817553	0.866785	0.888322	0.781024	0.724709	0.746145	0.685814	0.839635	0.874082	0.804405	0.787923	0.902439	0.834043
62.407	0.818617	0.867377	0.889598	0.78253	0.726052	0.747526	0.687417	0.840939	0.875131	0.805286	0.787923	0.903629	0.835106
62.428	0.819681	0.868561	0.890236	0.784337	0.727619	0.748907	0.68902	0.842243	0.876705	0.806167	0.789396	0.904224	0.83617
62.45	0.820745	0.869745	0.891512	0.785843	0.728962	0.750288	0.690622	0.842894	0.877754	0.807048	0.790869	0.905413	0.837234
62.472	0.82234	0.87093	0.892151	0.787651	0.730304	0.751669	0.692493	0.844198	0.879328	0.80793	0.790869	0.906603	0.838298
62.494	0.823404	0.872114	0.893427	0.789157	0.731647	0.753049	0.694096	0.845502	0.880378	0.808811	0.792342	0.907793	0.839362
62.515	0.824468	0.873298	0.894065	0.790663	0.73299	0.75443	0.695699	0.846154	0.881427	0.809692	0.792342	0.908388	0.840426
62.537	0.825532	0.874482	0.895341	0.79247	0.734333	0.755811	0.697569	0.847458	0.883001	0.810573	0.793814	0.909578	0.841489
62.559	0.826596	0.875666	0.89598	0.793976	0.735676	0.757192	0.699172	0.848761	0.88405	0.812335	0.793814	0.910173	0.842553
62.581	0.82766	0.876258	0.897256	0.795482	0.737019	0.758573	0.700775	0.849413	0.8851	0.813216	0.795287	0.911362	0.843617
62.602	0.828723	0.877442	0.897894	0.797289	0.738362	0.759954	0.702378	0.850717	0.886674	0.814097	0.79676	0.912552	0.844681
62.624	0.829787	0.878626	0.89917	0.798795	0.739705	0.761335	0.704248	0.852021	0.887723	0.814978	0.79676	0.913147	0.845745
62.646	0.830851	0.879811	0.899809	0.800301	0.741047	0.762716	0.705851	0.852673	0.888772	0.815859	0.798233	0.914337	0.846277
62.668	0.831915	0.880995	0.901085	0.801807	0.74239	0.764097	0.707454	0.853977	0.889822	0.81674	0.798233	0.915526	0.84734
62.689	0.832979	0.881587	0.901723	0.803614	0.743733	0.765478	0.709057	0.85528	0.891396	0.817621	0.799705	0.916121	0.848404
62.711	0.834043	0.882771	0.902999	0.80512	0.745076	0.766628	0.71066	0.855932	0.892445	0.818502	0.801178	0.917311	0.849468
62.733	0.835106	0.883955	0.903638	0.806627	0.746419	0.768009	0.71253	0.857236	0.893494	0.819383	0.801178	0.918501	0.850532
62.755	0.83617	0.885139	0.904914	0.808434	0.747762	0.76939	0.714133	0.85854	0.894544	0.820264	0.802651	0.919096	0.851596
62.776	0.837234	0.885731	0.905552	0.80994	0.749105	0.770771	0.715736	0.859192	0.896118	0.821145	0.802651	0.920286	0.852128
62.798	0.838298	0.886915	0.906828	0.811446	0.750448	0.772152	0.717339	0.860495	0.897167	0.822026	0.804124	0.92088	0.853191
62.82	0.839362	0.888099	0.907466	0.813253	0.751791	0.773533	0.718942	0.861147	0.898216	0.823789	0.804124	0.92207	0.854255
62.842	0.840426	0.888692	0.908105	0.814759	0.753133	0.774914	0.720812	0.862451	0.899265	0.82467	0.805596	0.922665	0.855319
62.863	0.841489	0.889876	0.909381	0.816265	0.754476	0.776295	0.722415	0.863755	0.900315	0.825551	0.807069	0.923855	0.856383
62.885	0.842553	0.89106	0.910019	0.817771	0.755819	0.777675	0.724018	0.864407	0.901889	0.826432	0.807069	0.925045	0.856915
62.907	0.843617	0.891652	0.910657	0.819578	0.757162	0.778826	0.725621	0.865711	0.902938	0.827313	0.808542	0.92564	0.857979
62.929	0.844681	0.892836	0.911934	0.821084	0.758505	0.780207	0.727224	0.866362	0.903987	0.828194	0.808542	0.926829	0.859043
62.95	0.845745	0.89402	0.912572	0.82259	0.759848	0.781588	0.728827	0.867666	0.905037	0.829075	0.810015	0.927424	0.860106
62.972	0.846277	0.894612	0.913848	0.824096	0.761191	0.782969	0.730697	0.86897	0.906086	0.829956	0.811487	0.928614	0.860638
62.994	0.84734	0.895796	0.914486	0.825602	0.762534	0.78435	0.7323	0.869622	0.907135	0.830837	0.811487	0.929209	0.861702
63.016	0.848404	0.896388	0.915124	0.82741	0.763876	0.785731	0.733903	0.870926	0.908185	0.831718	0.81296	0.930399	0.862766
63.037	0.849468	0.897573	0.916401	0.828916	0.764996	0.787112	0.735506	0.871578	0.909234	0.832599	0.81296	0.930993	0.863298
63.059	0.850532	0.898757	0.917039	0.830422	0.766338	0.788493	0.737109	0.872881	0.910808	0.83348	0.814433	0.932183	0.864362
63.081	0.851596	0.899349	0.917677	0.831928	0.767681	0.789873	0.738712	0.873533	0.911857	0.834361	0.815906	0.932778	0.865426
63.103	0.852128	0.900533	0.918953	0.833434	0.769024	0.791254	0.740315	0.874837	0.912907	0.835242	0.815906	0.933968	0.866489
63.124	0.853191	0.901125	0.919592	0.835241	0.770367	0.792865	0.741918	0.876141	0.913956	0.836123	0.817378	0.934563	0.867021
63.146	0.854255	0.902309	0.92023	0.836747	0.771486	0.794246	0.743521	0.876793	0.915005	0.837004	0.818851	0.935753	0.868085
63.168	0.855319	0.902901	0.920868	0.838253	0.772829	0.795627	0.745124	0.878096	0.916055	0.837885	0.818851	0.936347	0.869149
63.19	0.856383	0.904085	0.922144	0.839759	0.774172	0.797008	0.746727	0.878748	0.917104	0.838767	0.820324	0.937537	0.869681
63.211	0.856915	0.904677	0.922782	0.841265	0.775515	0.798389	0.74833	0.880052	0.918153	0.839648	0.821797	0.938132	0.870745
63.233	0.857979	0.905269	0.923421	0.842771	0.776634	0.79977	0.749933	0.880704	0.919203	0.840529	0.821797	0.938727	0.871809
63.255	0.859043	0.906454	0.924059	0.844277	0.777977	0.801381	0.751536	0.882008	0.920252	0.84141	0.82327	0.939917	0.87234
63.277	0.860106	0.907046	0.925335	0.845783	0.77932	0.802762	0.753139	0.88266	0.921301	0.842291	0.82327	0.940512	0.873404
63.298	0.860638	0.90823	0.925973	0.847289	0.780439	0.804143	0.754742	0.883963	0.92235	0.843172	0.824742	0.941701	0.874468
63.32	0.861702	0.908822	0.926611	0.849096	0.781782	0.805524	0.756345	0.884615	0.922875	0.844053	0.826215	0.942296	0.875
63.342	0.862766	0.909414	0.92725	0.850602	0.782901	0.807135	0.757948	0.885919	0.923924	0.844934	0.827688	0.942891	0.876064
63.364	0.863298	0.910598	0.928526	0.852108	0.784244	0.808516	0.759284	0.886571	0.924974	0.845815	0.827688	0.944081	0.877128
63.385	0.864362	0.91119	0.929164	0.853614	0.785586	0.809896	0.760887	0.887875	0.926023	0.846696	0.829161	0.944676	0.87766
63.407	0.865426	0.912374	0.929802	0.85512	0.786705	0.811507	0.76249	0.888527	0.927072	0.847577	0.830633	0.945866	0.878723
63.429	0.866489	0.912966	0.93044	0.856627	0.788048	0.812888	0.764093	0.889831	0.928122	0.848458	0.830633	0.94646	0.879787
63.451	0.867021	0.913558	0.931717	0.858133	0.789167	0.814499	0.765696	0.890482	0.929171	0.849339	0.832106	0.947055	0.880319
[truncated: 761 more rows]

## Sheet: Nsp1_Del40_screening
Temperature	Cloxacillin	Perindoprin	Bosentine	Dopexamine	Nicardipin	Saquinavir	Montelukast	Lidoflazine	Doripenem	Mupirocin	Verapmil	Formoterol	Nsp1
20	0.0590462	0.0912779	0.0336245	0.124782	0.109463	0.0981697	0	0	0.297224	0.130318	0	0.0510099	0.0590462
20.022	0.0590462	0.0908722	0.0336245	0.123909	0.109463	0.0977537	0.000816993	0.000450653	0.296068	0.129783	0.000700771	0.0513523	0.0590462
20.044	0.0590462	0.0904665	0.0336245	0.123473	0.108951	0.0973378	0.00163399	0.000901307	0.294911	0.129248	0.00140154	0.0516946	0.0590462
20.065	0.0590462	0.0900609	0.0336245	0.1226	0.108951	0.0969218	0.00204248	0.00180261	0.293755	0.128713	0.00210231	0.052037	0.0594247
20.087	0.0590462	0.0896552	0.0336245	0.121728	0.108951	0.0965058	0.00285948	0.00225327	0.292213	0.128178	0.0024527	0.0527217	0.0594247
20.109	0.0590462	0.0896552	0.0336245	0.120855	0.10844	0.0960899	0.00367647	0.00270392	0.291056	0.127642	0.00315347	0.053064	0.0598032
20.131	0.0590462	0.0892495	0.0336245	0.119983	0.10844	0.0960899	0.00449346	0.00360523	0.2899	0.127107	0.00385424	0.0534064	0.0598032
20.152	0.0590462	0.0888438	0.0336245	0.11911	0.107928	0.0956739	0.00531046	0.00405588	0.288743	0.126572	0.00455501	0.0537487	0.0601817
20.174	0.0590462	0.0884381	0.0336245	0.118237	0.107928	0.0952579	0.00612745	0.00450653	0.287587	0.126037	0.0049054	0.0540911	0.0601817
20.196	0.0590462	0.0880325	0.0336245	0.117365	0.107928	0.0948419	0.00694444	0.00540784	0.28643	0.125502	0.00560617	0.0544334	0.0605602
20.218	0.0590462	0.0876268	0.0336245	0.116928	0.107417	0.094426	0.00776144	0.00585849	0.284888	0.124967	0.00630694	0.0547758	0.0605602
20.24	0.0590462	0.0872211	0.0336245	0.116056	0.107417	0.09401	0.00857843	0.00630915	0.283732	0.124431	0.00700771	0.0551181	0.0605602
20.261	0.0594247	0.0868154	0.0336245	0.115183	0.106905	0.093594	0.00939542	0.00721046	0.282575	0.123896	0.00735809	0.0554605	0.0609387
20.283	0.0594247	0.0864097	0.0336245	0.114311	0.106905	0.093594	0.0102124	0.00766111	0.281419	0.123361	0.00805886	0.0558028	0.0609387
20.305	0.0598032	0.0860041	0.0336245	0.113438	0.106905	0.093178	0.0110294	0.00811176	0.280262	0.122826	0.00875964	0.0561452	0.0613172
20.327	0.0598032	0.0855984	0.0336245	0.112565	0.106394	0.0927621	0.0118464	0.00901307	0.279106	0.122291	0.00946041	0.0564875	0.0613172
20.348	0.0601817	0.0855984	0.0336245	0.112129	0.106394	0.0923461	0.0130719	0.00946372	0.277564	0.121755	0.0101612	0.0568299	0.0616957
20.37	0.0601817	0.0851927	0.0336245	0.111257	0.105882	0.0919301	0.0138889	0.00991438	0.276407	0.12122	0.0105116	0.0571722	0.0616957
20.392	0.0605602	0.084787	0.0336245	0.110384	0.105882	0.0915141	0.0147059	0.0108157	0.275251	0.120685	0.0112123	0.0571722	0.0620742
20.414	0.0605602	0.0843813	0.0336245	0.109511	0.105371	0.0910982	0.0155229	0.0112663	0.274094	0.12015	0.0119131	0.0575145	0.0620742
20.436	0.0605602	0.0839757	0.0336245	0.108639	0.105371	0.0906822	0.0163399	0.011717	0.272938	0.119615	0.0126139	0.0578569	0.0620742
20.457	0.0609387	0.08357	0.0336245	0.107766	0.104859	0.0902662	0.0171569	0.0126183	0.271781	0.119079	0.0129643	0.0581992	0.0624527
20.479	0.0609387	0.0831643	0.0336245	0.106894	0.104859	0.0902662	0.0179739	0.0130689	0.270239	0.118544	0.013665	0.0585416	0.0624527
20.501	0.0613172	0.0827586	0.0336245	0.106457	0.104348	0.0898502	0.0187908	0.0135196	0.269082	0.118277	0.0143658	0.0588839	0.0628312
20.523	0.0590462	0.0827586	0.0336245	0.105585	0.104348	0.0894343	0.0196078	0.0144209	0.267926	0.117742	0.0147162	0.0592263	0.0628312
20.544	0.0590462	0.0823529	0.0336245	0.104712	0.103836	0.0890183	0.0204248	0.0148716	0.266769	0.117206	0.015417	0.0595686	0.0632097
20.566	0.0594247	0.0819473	0.0336245	0.103839	0.103836	0.0886023	0.0212418	0.0157729	0.265613	0.116671	0.0161177	0.059911	0.0632097
20.588	0.0594247	0.0815416	0.0336245	0.102967	0.103325	0.0881864	0.0220588	0.0162235	0.264071	0.116136	0.0168185	0.0602533	0.0632097
20.61	0.0598032	0.0811359	0.0336245	0.102094	0.103325	0.0877704	0.0228758	0.0166742	0.262914	0.115601	0.0171689	0.0605957	0.0635882
20.632	0.0598032	0.0807302	0.0336245	0.101658	0.102813	0.0873544	0.0236928	0.0175755	0.261758	0.115066	0.0178697	0.0605957	0.0635882
20.653	0.0601817	0.0803245	0.0336245	0.100785	0.102302	0.0869384	0.0245098	0.0180261	0.260601	0.11453	0.0185704	0.060938	0.0639667
20.675	0.0601817	0.0803245	0.0336245	0.0999127	0.102302	0.0869384	0.0253268	0.0184768	0.259059	0.114263	0.0192712	0.0612804	0.0639667
20.697	0.0605602	0.0799189	0.0336245	0.0990401	0.10179	0.0865225	0.0265523	0.0193781	0.257903	0.113728	0.0196216	0.0616227	0.0639667
20.719	0.0605602	0.0795132	0.0336245	0.0981675	0.10179	0.0861065	0.0273693	0.0198288	0.256746	0.113192	0.0203224	0.0619651	0.0643452
20.74	0.0605602	0.0791075	0.0340611	0.0972949	0.101279	0.0856905	0.0281863	0.0202794	0.25559	0.112657	0.0210231	0.0623074	0.0643452
20.762	0.0609387	0.0787018	0.0340611	0.0968586	0.100767	0.0852745	0.0290033	0.0211807	0.254433	0.112122	0.0213735	0.0623074	0.0647237
20.784	0.0609387	0.0782961	0.0340611	0.095986	0.100767	0.0848586	0.0298203	0.0216314	0.252891	0.111587	0.0220743	0.0626498	0.0647237
20.806	0.0613172	0.0782961	0.0340611	0.0951134	0.100256	0.0844426	0.0306373	0.022082	0.251735	0.111319	0.0227751	0.0629921	0.0651022
20.828	0.0613172	0.0778905	0.0340611	0.0942408	0.100256	0.0840266	0.0314542	0.0229833	0.250578	0.110784	0.0234758	0.0633345	0.0651022
20.849	0.0616957	0.0774848	0.0340611	0.0933682	0.0997442	0.0836106	0.0322712	0.023434	0.249422	0.110249	0.0238262	0.0636768	0.0651022
20.871	0.0616957	0.0770791	0.0340611	0.0929319	0.0992327	0.0831947	0.0330882	0.0238846	0.248265	0.109714	0.024527	0.0636768	0.0654807
20.893	0.0620742	0.0766734	0.0340611	0.0920593	0.0992327	0.0831947	0.0339052	0.0247859	0.246723	0.109178	0.0252278	0.0640192	0.0654807
20.915	0.0620742	0.0766734	0.0340611	0.0911867	0.0987212	0.0827787	0.0351307	0.0252366	0.245567	0.108911	0.0255781	0.0643615	0.0654807
20.936	0.0620742	0.0762677	0.0340611	0.0903141	0.0982097	0.0823627	0.0359477	0.0256872	0.24441	0.108376	0.0262789	0.0647039	0.0658592
20.958	0.0624527	0.0758621	0.0340611	0.0894415	0.0982097	0.0819468	0.0367647	0.0265886	0.243254	0.107841	0.0269797	0.0647039	0.0658592
20.98	0.0624527	0.0754564	0.0340611	0.0890052	0.0976982	0.0815308	0.0375817	0.0270392	0.241712	0.107305	0.0273301	0.0650462	0.0662377
21.002	0.0628312	0.0750507	0.0340611	0.0881326	0.0971867	0.0811148	0.0383987	0.0274899	0.240555	0.10677	0.0280308	0.0653886	0.0662377
21.024	0.0628312	0.0750507	0.0340611	0.08726	0.0971867	0.0806988	0.0392157	0.0283912	0.239399	0.106503	0.0287316	0.0657309	0.0662377
21.045	0.0632097	0.074645	0.0340611	0.0863874	0.0966752	0.0802829	0.0400327	0.0288418	0.238242	0.105967	0.029082	0.0657309	0.0666162
21.067	0.0632097	0.0742394	0.0340611	0.0855148	0.0961637	0.0798669	0.0408497	0.0292925	0.2367	0.105432	0.0297828	0.0660733	0.0666162
21.089	0.0632097	0.0738337	0.0340611	0.0850785	0.0956522	0.0794509	0.0416667	0.0297431	0.235544	0.104897	0.0304835	0.0664156	0.0666162
21.111	0.0635882	0.073428	0.0340611	0.0842059	0.0956522	0.0790349	0.0428922	0.0306444	0.234387	0.104629	0.0308339	0.0664156	0.0669947
21.132	0.0635882	0.073428	0.0340611	0.0833333	0.0951407	0.0790349	0.0437092	0.0310951	0.233231	0.104094	0.0315347	0.066758	0.0669947
21.154	0.0639667	0.0730223	0.0340611	0.0824607	0.0946292	0.078619	0.0445261	0.0315457	0.231689	0.103559	0.0318851	0.0671003	0.0673732
21.176	0.0639667	0.0726166	0.0340611	0.0820244	0.0941176	0.078203	0.0453431	0.032447	0.230532	0.103024	0.0325858	0.0671003	0.0673732
21.198	0.0639667	0.072211	0.0340611	0.0811518	0.0941176	0.077787	0.0461601	0.0328977	0.229375	0.102489	0.0332866	0.0674427	0.0673732
21.22	0.0643452	0.072211	0.0340611	0.0802792	0.0936061	0.077371	0.0469771	0.0333484	0.228219	0.102221	0.033637	0.067785	0.0677517
21.241	0.0643452	0.0718053	0.0340611	0.0794066	0.0930946	0.0769551	0.0477941	0.0342497	0.226677	0.101686	0.0343378	0.067785	0.0677517
21.263	0.0647237	0.0713996	0.0340611	0.0789703	0.0925831	0.0765391	0.0486111	0.0347003	0.22552	0.101151	0.0350385	0.0681274	0.0677517
21.285	0.0647237	0.0709939	0.0340611	0.0780977	0.0925831	0.0761231	0.0494281	0.035151	0.224364	0.100615	0.0353889	0.0681274	0.0677517
21.307	0.0651022	0.0709939	0.0340611	0.0772251	0.0920716	0.0757072	0.0506536	0.0356016	0.223207	0.100348	0.0360897	0.0684697	0.0681302
21.328	0.0651022	0.0705882	0.0340611	0.0763525	0.0915601	0.0752912	0.0514706	0.0365029	0.221665	0.0998127	0.0364401	0.0688121	0.0681302
21.35	0.0651022	0.0701826	0.0340611	0.0759162	0.0910486	0.0748752	0.0522876	0.0369536	0.220509	0.0992775	0.0371409	0.0688121	0.0681302
21.372	0.0654807	0.0697769	0.0340611	0.0750436	0.0905371	0.0748752	0.0531046	0.0374042	0.219352	0.0987423	0.0378416	0.0691544	0.0685087
21.394	0.0654807	0.0697769	0.0340611	0.074171	0.0900256	0.0744592	0.0539216	0.0383055	0.218196	0.0982071	0.038192	0.0691544	0.0685087
21.416	0.0654807	0.0693712	0.0340611	0.0737347	0.0900256	0.0740433	0.0547386	0.0387562	0.216654	0.0979395	0.0388928	0.0694967	0.0685087
21.437	0.0658592	0.0689655	0.0340611	0.0728621	0.0895141	0.0736273	0.0555556	0.0392068	0.215497	0.0974043	0.0392432	0.0694967	0.0685087
21.459	0.0658592	0.0689655	0.0340611	0.0719895	0.0890026	0.0732113	0.0563725	0.0396575	0.214341	0.0968691	0.0399439	0.0698391	0.0688872
21.481	0.0662377	0.0685598	0.0340611	0.0711169	0.088491	0.0727953	0.0571895	0.0405588	0.213184	0.096334	0.0402943	0.0698391	0.0688872
21.503	0.0662377	0.0681542	0.0340611	0.0706806	0.0879795	0.0723794	0.0580065	0.0410095	0.211642	0.0957988	0.0409951	0.0701814	0.0688872
21.525	0.0662377	0.0677485	0.0340611	0.069808	0.087468	0.0719634	0.0588235	0.0414601	0.210486	0.0955312	0.0416959	0.0701814	0.0688872
21.546	0.0666162	0.0677485	0.0340611	0.0689354	0.087468	0.0715474	0.0596405	0.0419108	0.209329	0.094996	0.0420463	0.0705238	0.0692657
21.568	0.0666162	0.0673428	0.0340611	0.0684991	0.0869565	0.0711314	0.0604575	0.0428121	0.208173	0.0944608	0.042747	0.0705238	0.0692657
21.59	0.0666162	0.0669371	0.0340611	0.0676265	0.086445	0.0707155	0.0612745	0.0432627	0.206631	0.0939256	0.0430974	0.0708661	0.0692657
21.612	0.0669947	0.0669371	0.0340611	0.0667539	0.0859335	0.0707155	0.0620915	0.0437134	0.205474	0.0933904	0.0437982	0.0708661	0.0692657
21.633	0.0669947	0.0665314	0.0340611	0.0663176	0.085422	0.0702995	0.0629085	0.044164	0.204318	0.0931228	0.0441486	0.0712085	0.0696442
21.655	0.0673732	0.0661258	0.0340611	0.065445	0.0849105	0.0698835	0.0637255	0.0450653	0.203161	0.0925876	0.0448493	0.0712085	0.0696442
21.677	0.0673732	0.0657201	0.0340611	0.0645724	0.084399	0.0694676	0.0645425	0.045516	0.201619	0.0920524	0.0451997	0.0712085	0.0696442
21.699	0.0673732	0.0657201	0.0340611	0.0641361	0.0838875	0.0690516	0.0653595	0.0459667	0.200463	0.0915173	0.0459005	0.0715508	0.0696442
21.721	0.0677517	0.0653144	0.0340611	0.0632635	0.083376	0.0686356	0.0661765	0.0464173	0.199306	0.0909821	0.0462509	0.0715508	0.0696442
21.742	0.0677517	0.0649087	0.0340611	0.0628272	0.0828645	0.0682196	0.0669935	0.046868	0.197764	0.0904469	0.0469516	0.0718932	0.0696442
21.764	0.0677517	0.0649087	0.0340611	0.0619546	0.0828645	0.0678037	0.0678105	0.0477693	0.196608	0.0899117	0.047302	0.0718932	0.0700227
21.786	0.0677517	0.064503	0.0340611	0.061082	0.0823529	0.0673877	0.0686275	0.0482199	0.195451	0.0896441	0.0480028	0.0718932	0.0700227
21.808	0.0681302	0.0640974	0.0340611	0.0606457	0.0818414	0.0673877	0.0694444	0.0486706	0.194295	0.0891089	0.0483532	0.0722355	0.0700227
21.829	0.0681302	0.0640974	0.0340611	0.0597731	0.0813299	0.0669717	0.0702614	0.0491212	0.192753	0.0885737	0.049054	0.0722355	0.0700227
21.851	0.0681302	0.0636917	0.0340611	0.0593368	0.0808184	0.0665557	0.0710784	0.0495719	0.191596	0.0880385	0.0494043	0.0725779	0.0700227
21.873	0.0685087	0.063286	0.0340611	0.0584642	0.0803069	0.0661398	0.0718954	0.0504732	0.190439	0.0875033	0.0501051	0.0725779	0.0700227
21.895	0.0685087	0.063286	0.0340611	0.0575916	0.0797954	0.0657238	0.0727124	0.0509238	0.188897	0.0869682	0.0504555	0.0725779	0.0700227
21.917	0.0685087	0.0628803	0.0340611	0.0571553	0.0792839	0.0653078	0.0735294	0.0513745	0.187741	0.086433	0.0511563	0.0729202	0.0700227
21.938	0.0685087	0.0624746	0.0340611	0.0562827	0.0787724	0.0648918	0.0743464	0.0518251	0.186584	0.0858978	0.0515067	0.0729202	0.0700227
21.96	0.0688872	0.0624746	0.0340611	0.0558464	0.0782609	0.0648918	0.0751634	0.0522758	0.185428	0.0853626	0.051857	0.0729202	0.0700227
21.982	0.0688872	0.062069	0.0340611	0.0549738	0.0777494	0.0644759	0.0759804	0.0527265	0.183886	0.0848274	0.0525578	0.0729202	0.0704012
22.004	0.0688872	0.0616633	0.0340611	0.0545375	0.0772379	0.0640599	0.0763889	0.0536278	0.182729	0.0842922	0.0529082	0.0732626	0.0704012
22.025	0.0688872	0.0616633	0.0340611	0.0536649	0.0767263	0.0636439	0.0772059	0.0540784	0.181573	0.083757	0.053609	0.0732626	0.0704012
22.047	0.0692657	0.0612576	0.0340611	0.0527923	0.0762148	0.063228	0.0780229	0.0545291	0.180031	0.0832218	0.0539594	0.0732626	0.0704012
22.069	0.0692657	0.0608519	0.0340611	0.052356	0.0757033	0.062812	0.0788399	0.0549797	0.178874	0.0826866	0.0546601	0.0736049	0.0704012
22.091	0.0692657	0.0608519	0.0340611	0.0514834	0.0751918	0.062396	0.0796569	0.0554304	0.177718	0.0821515	0.0550105	0.0736049	0.0704012
22.113	0.0692657	0.0604462	0.0336245	0.0510471	0.0751918	0.062396	0.0804739	0.055881	0.176176	0.0816163	0.0553609	0.0736049	0.0704012
22.134	0.0696442	0.0600406	0.0336245	0.0501745	0.0746803	0.06198	0.0808824	0.0563317	0.175019	0.0810811	0.0560617	0.0736049	0.0704012
22.156	0.0696442	0.0600406	0.0336245	0.0497382	0.0741688	0.0615641	0.0816993	0.0567823	0.173863	0.0805459	0.0564121	0.0739473	0.0704012
22.178	0.0696442	0.0596349	0.0336245	0.0488656	0.0736573	0.0611481	0.0825163	0.057233	0.172706	0.0800107	0.0571128	0.0739473	0.0700227
22.2	0.0696442	0.0592292	0.0336245	0.0484293	0.0731458	0.0607321	0.0833333	0.0581343	0.171164	0.0794755	0.0574632	0.0739473	0.0700227
22.221	0.0696442	0.0592292	0.0336245	0.0475567	0.0726343	0.0603161	0.0841503	0.0585849	0.170008	0.0789403	0.0578136	0.0739473	0.0700227
22.243	0.0696442	0.0588235	0.0336245	0.0471204	0.0721228	0.0599002	0.0845588	0.0590356	0.168851	0.0784051	0.0585144	0.0742896	0.0700227
22.265	0.0700227	0.0584178	0.0336245	0.0462478	0.0716113	0.0599002	0.0853758	0.0594863	0.167309	0.0778699	0.0588648	0.0742896	0.0700227
22.287	0.0700227	0.0584178	0.0336245	0.0458115	0.0710997	0.0594842	0.0861928	0.0599369	0.166153	0.0773348	0.0592151	0.0742896	0.0700227
22.309	0.0700227	0.0580122	0.0336245	0.0449389	0.0705882	0.0590682	0.0866013	0.0603876	0.164996	0.0767996	0.0599159	0.0742896	0.0700227
22.33	0.0700227	0.0576065	0.0336245	0.0445026	0.0700767	0.0586522	0.0874183	0.0608382	0.163454	0.0762644	0.0602663	0.0742896	0.0700227
22.352	0.0700227	0.0576065	0.0336245	0.04363	0.0695652	0.0582363	0.0882353	0.0612889	0.162298	0.0757292	0.0609671	0.074632	0.0700227
22.374	0.0700227	0.0572008	0.0336245	0.0431937	0.0690537	0.0578203	0.0886438	0.0617395	0.161141	0.0749264	0.0613174	0.074632	0.0700227
22.396	0.0700227	0.0567951	0.0336245	0.0423211	0.0685422	0.0578203	0.0894608	0.0621902	0.159599	0.0743912	0.0616678	0.074632	0.0700227
22.417	0.0700227	0.0563895	0.0336245	0.0418848	0.0680307	0.0574043	0.0902778	0.0626408	0.158443	0.073856	0.0623686	0.074632	0.0696442
22.439	0.0700227	0.0563895	0.0331878	0.0414485	0.0675192	0.0569884	0.0906863	0.0630915	0.157286	0.0733208	0.062719	0.074632	0.0696442
22.461	0.0700227	0.0559838	0.0331878	0.0405759	0.0670077	0.0565724	0.0915033	0.0635421	0.155744	0.0727857	0.0630694	0.0749743	0.0696442
22.483	0.0704012	0.0555781	0.0331878	0.0401396	0.0664962	0.0561564	0.0923203	0.0639928	0.154588	0.0722505	0.0637701	0.0749743	0.0696442
22.505	0.0704012	0.0555781	0.0331878	0.039267	0.0664962	0.0557404	0.0927288	0.0644434	0.153045	0.0714477	0.0641205	0.0749743	0.0696442
22.526	0.0704012	0.0551724	0.0331878	0.0388307	0.0659847	0.0553245	0.0935458	0.0648941	0.151889	0.0709125	0.0644709	0.0749743	0.0696442
22.548	0.0704012	0.0547667	0.0331878	0.0379581	0.0654731	0.0553245	0.0943627	0.0653447	0.150732	0.0703773	0.0651717	0.0749743	0.0692657
22.57	0.0704012	0.0547667	0.0331878	0.0375218	0.0649616	0.0549085	0.0947712	0.0657954	0.14919	0.0698421	0.0655221	0.0753167	0.0692657
22.592	0.0704012	0.0543611	0.0331878	0.0366492	0.0644501	0.0544925	0.0955882	0.0662461	0.148034	0.0693069	0.0662228	0.0753167	0.0692657
22.613	0.0704012	0.0539554	0.0331878	0.0362129	0.0639386	0.0540765	0.0959967	0.0666967	0.146877	0.0685041	0.0665732	0.0753167	0.0692657
22.635	0.0704012	0.0535497	0.0331878	0.0353403	0.0634271	0.0536606	0.0968137	0.0671474	0.145335	0.067969	0.0669236	0.0753167	0.0692657
22.657	0.0704012	0.0535497	0.0327511	0.034904	0.0629156	0.0532446	0.0976307	0.067598	0.144179	0.0674338	0.0676244	0.0753167	0.0692657
22.679	0.0700227	0.053144	0.0327511	0.0340314	0.0624041	0.0528286	0.0980392	0.0680487	0.142637	0.0668986	0.0679748	0.075659	0.0688872
22.701	0.0700227	0.0527383	0.0327511	0.0335951	0.0624041	0.0524126	0.0988562	0.0684993	0.14148	0.0663634	0.0683252	0.075659	0.0688872
22.722	0.0700227	0.0523327	0.0327511	0.0327225	0.0618926	0.0519967	0.0996732	0.06895	0.139938	0.0655606	0.0690259	0.075659	0.0688872
22.744	0.0700227	0.0523327	0.0327511	0.0322862	0.0613811	0.0519967	0.100082	0.0694006	0.138782	0.0650254	0.0693763	0.075659	0.0688872
22.766	0.0700227	0.051927	0.0327511	0.0314136	0.0608696	0.0515807	0.100899	0.0698513	0.137625	0.0644902	0.0700771	0.075659	0.0688872
22.788	0.0700227	0.0515213	0.0327511	0.0309773	0.0603581	0.0511647	0.101716	0.0703019	0.136083	0.063955	0.0704275	0.0760014	0.0688872
22.809	0.0700227	0.0511156	0.0327511	0.0301047	0.0598465	0.0507488	0.102124	0.0707526	0.134927	0.0634199	0.0707779	0.0760014	0.0685087
22.831	0.0700227	0.0507099	0.0323144	0.0296684	0.059335	0.0503328	0.102941	0.0712032	0.133385	0.0628847	0.0714786	0.0760014	0.0685087
22.853	0.0700227	0.0507099	0.0323144	0.0287958	0.0588235	0.0499168	0.103758	0.0716539	0.132228	0.0623495	0.071829	0.0760014	0.0685087
22.875	0.0700227	0.0503043	0.0323144	0.0283595	0.058312	0.0495008	0.104575	0.0725552	0.130686	0.0618143	0.0725298	0.0760014	0.0685087
22.897	0.0700227	0.0498986	0.0323144	0.0274869	0.0578005	0.0490849	0.104984	0.0730059	0.129144	0.0612791	0.0728802	0.0760014	0.0685087
22.918	0.0696442	0.0494929	0.0323144	0.0266143	0.057289	0.0486689	0.105801	0.0734565	0.127988	0.0607439	0.0735809	0.0760014	0.0685087
22.94	0.0696442	0.0494929	0.0323144	0.026178	0.0567775	0.0478369	0.106618	0.0739072	0.126446	0.0602087	0.0739313	0.0763437	0.0685087
22.962	0.0696442	0.0490872	0.0323144	0.0253054	0.056266	0.047421	0.107435	0.0743578	0.125289	0.0596735	0.0742817	0.0763437	0.0681302
22.984	0.0696442	0.0486815	0.0318777	0.0248691	0.0557545	0.047005	0.108252	0.0748085	0.123747	0.0594059	0.0749825	0.0763437	0.0681302
23.005	0.0696442	0.0482759	0.0318777	0.0244328	0.055243	0.046589	0.10866	0.0748085	0.122205	0.0586032	0.0749825	0.075659	0.0677517
23.027	0.0696442	0.0478702	0.031441	0.0239965	0.0542199	0.0457571	0.109069	0.0748085	0.120663	0.058068	0.0753329	0.0749743	0.0673732
23.049	0.0692657	0.0478702	0.0310044	0.0235602	0.0537084	0.0449251	0.109886	0.0748085	0.119121	0.0572652	0.0753329	0.0742896	0.0666162
23.071	0.0692657	0.0474645	0.0310044	0.0231239	0.0526854	0.0445092	0.110294	0.0743578	0.117194	0.05673	0.0753329	0.0739473	0.0662377
23.093	0.0692657	0.0470588	0.0305677	0.0226876	0.0521739	0.0436772	0.110703	0.0743578	0.115652	0.0561948	0.0756833	0.0732626	0.0654807
23.114	0.0692657	0.0466531	0.030131	0.0226876	0.0511509	0.0428453	0.111111	0.0743578	0.114109	0.055392	0.0756833	0.0725779	0.0651022
23.136	0.0692657	0.0462475	0.030131	0.0222513	0.0506394	0.0420133	0.11152	0.0743578	0.112567	0.0548568	0.0756833	0.0718932	0.0647237
23.158	0.0692657	0.0458418	0.0296943	0.021815	0.0496164	0.0411814	0.111928	0.0743578	0.11064	0.0543216	0.0756833	0.0712085	0.0639667
23.18	0.0688872	0.0454361	0.0292576	0.0213787	0.0491049	0.0403494	0.112337	0.0743578	0.109098	0.0535189	0.0760336	0.0705238	0.0635882
23.201	0.0688872	0.0450304	0.028821	0.0209424	0.0480818	0.0395175	0.112745	0.0739072	0.107556	0.0529837	0.0760336	0.0694967	0.0628312
23.223	0.0688872	0.0446247	0.0283843	0.0209424	0.0475703	0.0386855	0.113154	0.0739072	0.105628	0.0524485	0.0760336	0.0688121	0.0620742
23.245	0.0688872	0.0442191	0.0279476	0.0205061	0.0465473	0.0378536	0.113562	0.0739072	0.104086	0.0516457	0.0760336	0.0681274	0.0616957
23.267	0.0688872	0.0438134	0.0279476	0.0200698	0.0460358	0.0370216	0.114379	0.0734565	0.102544	0.0511105	0.0760336	0.0671003	0.0609387
23.289	0.0688872	0.0434077	0.0275109	0.0196335	0.0450128	0.0361897	0.114788	0.0734565	0.100617	0.0505753	0.0760336	0.0664156	0.0605602
23.31	0.0685087	0.043002	0.0270742	0.0196335	0.0445013	0.0353577	0.115196	0.0734565	0.0990748	0.0500401	0.0760336	0.0653886	0.0598032
23.332	0.0685087	0.0425963	0.0266376	0.0191972	0.0434783	0.0345258	0.115605	0.0730059	0.0975328	0.0492374	0.0760336	0.0647039	0.0590462
23.354	0.0685087	0.0421907	0.0262009	0.0187609	0.0429668	0.0336938	0.116013	0.0730059	0.0956052	0.0487022	0.0756833	0.0636768	0.0586677
23.376	0.0685087	0.0413793	0.0257642	0.0187609	0.0419437	0.0328619	0.116422	0.0725552	0.0940632	0.048167	0.0756833	0.0629921	0.0579107
23.397	0.0685087	0.0409736	0.0253275	0.0183246	0.0414322	0.03203	0.11683	0.0725552	0.0925212	0.0476318	0.0756833	0.0619651	0.0571537
23.419	0.0685087	0.040568	0.0248908	0.0178883	0.0404092	0.030782	0.117239	0.0721046	0.0905937	0.0470966	0.0756833	0.060938	0.0567752
23.441	0.0685087	0.0401623	0.0244541	0.017452	0.0398977	0.0299501	0.117647	0.0721046	0.0890517	0.0465614	0.0753329	0.059911	0.0560182
23.463	0.0681302	0.0397566	0.0240175	0.017452	0.0388747	0.0291181	0.118056	0.0716539	0.0871241	0.0457586	0.0753329	0.0592263	0.0552612
23.485	0.0681302	0.0393509	0.0240175	0.0170157	0.0383632	0.0282862	0.118464	0.0712032	0.0855821	0.0452234	0.0753329	0.0581992	0.0548827
23.506	0.0677517	0.0385396	0.0235808	0.0165794	0.0373402	0.0274542	0.119281	0.0712032	0.0840401	0.0446883	0.0749825	0.0571722	0.0541257
23.528	0.0673732	0.0381339	0.0231441	0.0165794	0.0368286	0.0262063	0.11969	0.0707526	0.0821126	0.0441531	0.0749825	0.0561452	0.0533687
23.55	0.0666162	0.0377282	0.0227074	0.0161431	0.0358056	0.0253744	0.120098	0.0703019	0.0805705	0.0436179	0.0746321	0.0551181	0.0526117
23.572	0.0662377	0.0373225	0.0222707	0.0157068	0.0352941	0.0245424	0.120507	0.0703019	0.078643	0.0430827	0.0746321	0.0540911	0.0522332
23.593	0.0654807	0.0365112	0.0218341	0.0157068	0.0342711	0.0237105	0.120915	0.0698513	0.077101	0.0425475	0.0742817	0.053064	0.0514762
23.615	0.0651022	0.0361055	0.0213974	0.0152705	0.0337596	0.0224626	0.121324	0.0694006	0.075559	0.0420123	0.0742817	0.0516946	0.0507192
23.637	0.0647237	0.0356998	0.0209607	0.0152705	0.0327366	0.0216306	0.121732	0.0694006	0.0736315	0.0414771	0.0739313	0.0506676	0.0499621
23.659	0.0639667	0.0352941	0.020524	0.0148342	0.0322251	0.0207987	0.122141	0.06895	0.0720894	0.0409419	0.0735809	0.0496405	0.0492051
23.681	0.0635882	0.0344828	0.0200873	0.0143979	0.031202	0.0199667	0.122549	0.0684993	0.0705474	0.0404067	0.0735809	0.0486135	0.0484481
23.702	0.0628312	0.0340771	0.0196507	0.0143979	0.0306905	0.0191348	0.122958	0.0680487	0.0690054	0.0398716	0.0732306	0.0475864	0.0480696
23.724	0.0620742	0.0336714	0.019214	0.0139616	0.0296675	0.0183028	0.123366	0.067598	0.0670779	0.0393364	0.0728802	0.046217	0.0473126
23.746	0.0616957	0.03286	0.0187773	0.0139616	0.029156	0.0170549	0.123775	0.0671474	0.0655359	0.0388012	0.0725298	0.04519	0.0465556
23.768	0.0609387	0.0324544	0.0183406	0.0135253	0.028133	0.016223	0.124183	0.0671474	0.0639938	0.038266	0.0725298	0.044163	0.0457986
23.789	0.0605602	0.0320487	0.0179039	0.013089	0.0276215	0.015391	0.124592	0.0666967	0.0624518	0.0377308	0.0721794	0.0427936	0.0450416
23.811	0.0598032	0.0312373	0.0174672	0.013089	0.0265985	0.0145591	0.125	0.0662461	0.0609098	0.036928	0.071829	0.0417665	0.0442846
23.833	0.0590462	0.0308316	0.0170306	0.0126527	0.026087	0.0137271	0.125408	0.0657954	0.0589823	0.0363928	0.0714786	0.0407395	0.0435276
23.855	0.0586677	0.030426	0.0161572	0.0126527	0.0250639	0.0128952	0.125817	0.0653447	0.0574402	0.0358576	0.0711282	0.0393701	0.0431491
23.877	0.0579107	0.0296146	0.0157205	0.0122164	0.0240409	0.0120632	0.126225	0.0648941	0.0558982	0.0353225	0.0707779	0.038343	0.0423921
23.898	0.0571537	0.0292089	0.0157205	0.0122164	0.0235294	0.0112313	0.126634	0.0644434	0.0543562	0.0347873	0.0704275	0.037316	0.0416351
23.92	0.0567752	0.0288032	0.0152838	0.0117801	0.0230179	0.0108153	0.127042	0.0639928	0.0528142	0.0342521	0.0700771	0.0359466	0.0408781
23.942	0.0560182	0.0279919	0.0148472	0.0117801	0.0219949	0.00998336	0.127451	0.0635421	0.0512722	0.0337169	0.0697267	0.0349195	0.0401211
23.964	0.0552612	0.0275862	0.0144105	0.0113438	0.0214834	0.00915141	0.127859	0.0630915	0.0497301	0.0331817	0.0693763	0.0338925	0.0393641
23.985	0.0548827	0.0271805	0.0139738	0.0113438	0.0204604	0.00831947	0.127859	0.0626408	0.0485736	0.0326465	0.0690259	0.0328655	0.0386071
24.007	0.0541257	0.0263692	0.0135371	0.0113438	0.0199488	0.00790349	0.128268	0.0621902	0.0470316	0.0321113	0.0686755	0.0314961	0.0382286
24.029	0.0533687	0.0259635	0.0131004	0.0109075	0.0189258	0.00707155	0.128676	0.0617395	0.0454896	0.0315761	0.0683252	0.030469	0.0374716
24.051	0.0526117	0.0255578	0.0126638	0.0109075	0.0184143	0.00665557	0.129085	0.0612889	0.0439476	0.0310409	0.0676244	0.029442	0.0367146
24.073	0.0522332	0.0247465	0.0122271	0.0104712	0.0173913	0.00582363	0.129085	0.0608382	0.0424056	0.0305058	0.067274	0.0284149	0.0359576
24.094	0.0514762	0.0243408	0.0117904	0.0104712	0.0168798	0.00540765	0.129493	0.0603876	0.041249	0.0299706	0.0669236	0.0270455	0.0352006
24.116	0.0507192	0.0239351	0.0113537	0.0104712	0.0163683	0.00499168	0.129902	0.0594863	0.039707	0.0294354	0.0665732	0.0260185	0.0344436
24.138	0.0499621	0.0231237	0.010917	0.0100349	0.0153453	0.00415973	0.129902	0.0590356	0.0385505	0.0289002	0.0662228	0.0249914	0.0336866
24.16	0.0492051	0.0227181	0.0104803	0.0100349	0.0148338	0.00374376	0.13031	0.0585849	0.0370085	0.0280974	0.0658725	0.0239644	0.0333081
24.181	0.0484481	0.0223124	0.0104803	0.0100349	0.0143223	0.00332779	0.13031	0.0581343	0.035852	0.0275622	0.0651717	0.0229374	0.0325511
24.203	0.0480696	0.021501	0.0100437	0.0095986	0.0132992	0.00291181	0.130719	0.0576836	0.0343099	0.027027	0.0648213	0.0219103	0.0317941
24.225	0.0473126	0.0210953	0.00960699	0.0095986	0.0127877	0.00249584	0.130719	0.057233	0.0331534	0.0264918	0.0644709	0.0208833	0.0310371
24.247	0.0465556	0.0206897	0.00917031	0.0095986	0.0122762	0.00207987	0.131127	0.0567823	0.0319969	0.0259566	0.0641205	0.0198562	0.0302801
24.269	0.0457986	0.0198783	0.00917031	0.0091623	0.0112532	0.00166389	0.131127	0.0563317	0.0304549	0.0251539	0.0634198	0.0188292	0.0295231
24.29	0.0450416	0.0194726	0.00873362	0.0091623	0.0107417	0.00166389	0.131127	0.0554304	0.0292984	0.0246187	0.0630694	0.0178021	0.0291446
24.312	0.0442846	0.0190669	0.00829694	0.0091623	0.0102302	0.00124792	0.131536	0.0549797	0.0281419	0.0240835	0.062719	0.0171174	0.0283876
24.334	0.0435276	0.0182556	0.00786026	0.0091623	0.00971867	0.000831947	0.131536	0.0545291	0.0269854	0.0235483	0.0623686	0.0160904	0.0276306
24.356	0.0431491	0.0178499	0.00786026	0.008726	0.00920716	0.000831947	0.131536	0.0540784	0.0258288	0.0230131	0.0620182	0.0150633	0.0268736
24.377	0.0423921	0.0174442	0.00742358	0.008726	0.00869565	0.000415973	0.131536	0.0536278	0.0246723	0.0222103	0.0616678	0.0143786	0.0261166
24.399	0.0416351	0.0166329	0.0069869	0.008726	0.00767263	0.000415973	0.131536	0.0531771	0.0235158	0.0216751	0.0609671	0.0133516	0.0253596
24.421	0.0408781	0.0162272	0.0069869	0.008726	0.00716113	0.000415973	0.131536	0.0527265	0.0223593	0.02114	0.0606167	0.0126669	0.0249811
24.443	0.0401211	0.0158215	0.00655022	0.008726	0.00664962	0	0.131536	0.0522758	0.0212028	0.0203372	0.0602663	0.0116398	0.0242241
24.465	0.0393641	0.0154158	0.00655022	0.008726	0.00613811	0	0.131536	0.0518251	0.0200463	0.019802	0.0599159	0.0109552	0.0234671
24.486	0.0386071	0.0146045	0.00611354	0.0082897	0.0056266	0	0.131536	0.0509238	0.0192753	0.0192668	0.0595655	0.0102705	0.0227101
24.508	0.0382286	0.0141988	0.00611354	0.0082897	0.00511509	0	0.131127	0.0504732	0.0181187	0.0187316	0.0592151	0.00958576	0.0219531
24.53	0.0374716	0.0137931	0.00567686	0.0082897	0.00511509	0	0.131127	0.0500225	0.0173477	0.0179288	0.0588648	0.00855871	0.0215746
24.552	0.0367146	0.0133874	0.00567686	0.0082897	0.00460358	0	0.131127	0.0495719	0.0161912	0.0173936	0.0585144	0.00787402	0.0208176
24.574	0.0359576	0.0125761	0.00524017	0.0082897	0.00409207	0.000415973	0.130719	0.0491212	0.0154202	0.0168584	0.058164	0.00718932	0.0200606
24.595	0.0352006	0.0121704	0.00524017	0.0082897	0.00358056	0.000415973	0.130719	0.0486706	0.0142637	0.0160557	0.0578136	0.00684697	0.0193036
24.617	0.0344436	0.0117647	0.00480349	0.0082897	0.00306905	0.000415973	0.13031	0.0482199	0.0134927	0.0155205	0.0574632	0.00616227	0.0189251
24.639	0.0336866	0.011359	0.00480349	0.0082897	0.00306905	0.000831947	0.13031	0.0477693	0.0127217	0.0149853	0.0571128	0.00547758	0.0181681
24.661	0.0333081	0.0109533	0.00480349	0.0082897	0.00255754	0.000831947	0.129902	0.0473186	0.0119507	0.0141825	0.0571128	0.00479288	0.0174111
24.682	0.0325511	0.0105477	0.00436681	0.0082897	0.00204604	0.00124792	0.129902	0.046868	0.0111796	0.0136473	0.0567624	0.00445053	0.016654
24.704	0.0317941	0.010142	0.00436681	0.0082897	0.00204604	0.00124792	0.129493	0.046868	0.0104086	0.0131121	0.0564121	0.00376583	0.0162755
24.726	0.0310371	0.00973631	0.00436681	0.0078534	0.00153453	0.00166389	0.129085	0.0464173	0.00963763	0.0123093	0.0560617	0.00342349	0.0155185
24.748	0.0302801	0.00933063	0.00393013	0.0078534	0.00153453	0.00207987	0.129085	0.0459667	0.00886662	0.0117742	0.0560617	0.00308114	0.0147615
24.77	0.0295231	0.00892495	0.00393013	0.0078534	0.00102302	0.00249584	0.128676	0.045516	0.00809561	0.011239	0.0557113	0.00273879	0.014383
24.791	0.0291446	0.00811359	0.00393013	0.0078534	0.00102302	0.00249584	0.128268	0.0450653	0.0073246	0.0107038	0.0553609	0.00205409	0.013626
24.813	0.0283876	0.00770791	0.00393013	0.0078534	0.000511509	0.00291181	0.127859	0.0446147	0.00693909	0.0101686	0.0553609	0.00171174	0.012869
24.835	0.0276306	0.00770791	0.00349345	0.0078534	0.000511509	0.00332779	0.127451	0.0446147	0.00616808	0.0093658	0.0550105	0.00136939	0.0124905
24.857	0.0268736	0.00730223	0.00349345	0.0078534	0.000511509	0.00374376	0.127042	0.044164	0.00578258	0.00883061	0.0550105	0.00136939	0.0117335
24.878	0.0261166	0.00689655	0.00349345	0.0078534	0.000511509	0.00415973	0.126634	0.0437134	0.00501157	0.00829542	0.0550105	0.00102705	0.011355
24.9	0.0253596	0.00649087	0.00349345	0.0078534	0	0.00499168	0.126225	0.0437134	0.00462606	0.00776024	0.0546601	0.000684697	0.010598
24.922	0.0249811	0.00608519	0.00305677	0.0078534	0	0.00540765	0.125817	0.0432627	0.00424056	0.00722505	0.0546601	0.000684697	0.0102195
24.944	0.0242241	0.00567951	0.00305677	0.0078534	0	0.00582363	0.125408	0.0428121	0.00385505	0.00668986	0.0546601	0.000342349	0.00946253
24.966	0.0234671	0.00527383	0.00305677	0.0078534	0	0.0062396	0.125	0.0428121	0.00308404	0.00615467	0.0546601	0.000342349	0.00908403
24.987	0.0227101	0.00486815	0.00305677	0.0078534	0	0.00707155	0.124592	0.0423614	0.00269854	0.00561948	0.0546601	0.000342349	0.00870553
25.009	0.0219531	0.00486815	0.00305677	0.0078534	0	0.00748752	0.123775	0.0423614	0.00231303	0.00508429	0.0546601	0	0.00794852
25.031	0.0215746	0.00446247	0.00305677	0.0078534	0	0.00790349	0.123366	0.0419108	0.00231303	0.0048167	0.0546601	0	0.00757002
25.053	0.0208176	0.0040568	0.00262009	0.0078534	0.000511509	0.00873544	0.122958	0.0419108	0.00192753	0.00428151	0.0546601	0	0.00719152
25.074	0.0200606	0.00365112	0.00262009	0.0078534	0.000511509	0.00915141	0.122549	0.0419108	0.00154202	0.00374632	0.0546601	0	0.00643452
25.096	0.0193036	0.00365112	0.00262009	0.0078534	0.000511509	0.00998336	0.121732	0.0414601	0.00115652	0.00347873	0.0546601	0.000342349	0.00605602
25.118	0.0189251	0.00324544	0.00262009	0.0078534	0.000511509	0.0103993	0.121324	0.0414601	0.00115652	0.00294354	0.0546601	0.000342349	0.00567752
25.14	0.0181681	0.00283976	0.00262009	0.0078534	0.00102302	0.0112313	0.120915	0.0414601	0.00077101	0.00267594	0.0550105	0.000342349	0.00529902
25.162	0.0174111	0.00283976	0.00262009	0.0078534	0.00102302	0.0116473	0.120507	0.0410095	0.00077101	0.00214075	0.0550105	0.000684697	0.00492051
25.183	0.016654	0.00243408	0.00218341	0.0078534	0.00153453	0.0124792	0.11969	0.0410095	0.000385505	0.00187316	0.0553609	0.000684697	0.00454201
25.205	0.0162755	0.00243408	0.00218341	0.0078534	0.00153453	0.0133111	0.119281	0.0410095	0.000385505	0.00160557	0.0553609	0.00102705	0.00416351
25.227	0.0155185	0.0020284	0.00218341	0.0078534	0.00204604	0.0137271	0.118464	0.0410095	0.000385505	0.00133797	0.0557113	0.00136939	0.00378501
25.249	0.0147615	0.00162272	0.00218341	0.0078534	0.00255754	0.0145591	0.118056	0.0410095	0	0.00107038	0.0560617	0.00136939	0.00340651
25.27	0.014383	0.00162272	0.00218341	0.0078534	0.00255754	0.015391	0.117647	0.0410095	0	0.000802783	0.0560617	0.00171174	0.00302801
25.292	0.013626	0.00162272	0.00174672	0.0078534	0.00306905	0.016223	0.11683	0.0410095	0	0.000535189	0.0564121	0.00205409	0.00264951
25.314	0.012869	0.00121704	0.00174672	0.0078534	0.00358056	0.0166389	0.116422	0.0410095	0	0.000535189	0.0567624	0.00239644	0.00227101
25.336	0.0124905	0.00121704	0.00174672	0.0078534	0.00409207	0.0174709	0.116013	0.0410095	0	0.000267594	0.0571128	0.00308114	0.00227101
25.358	0.0117335	0.000811359	0.00174672	0.0078534	0.00460358	0.0183028	0.115196	0.0410095	0	0.000267594	0.0574632	0.00342349	0.00189251
25.379	0.011355	0.000811359	0.00174672	0.0074171	0.00460358	0.0191348	0.114788	0.0410095	0	0	0.0578136	0.00376583	0.001514
25.401	0.010598	0.000811359	0.00174672	0.0074171	0.00511509	0.0199667	0.114379	0.0414601	0	0	0.058164	0.00445053	0.001514
25.423	0.0102195	0.00040568	0.00131004	0.0074171	0.0056266	0.0203827	0.113562	0.0414601	0.000385505	0	0.0588648	0.00479288	0.0011355
25.445	0.00946253	0.00040568	0.00131004	0.0074171	0.00613811	0.0212146	0.113154	0.0414601	0.000385505	0	0.0592151	0.00547758	0.0011355
25.466	0.00908403	0.00040568	0.00131004	0.0074171	0.00716113	0.0220466	0.112337	0.0414601	0.000385505	0	0.0595655	0.00581992	0.000757002
25.488	0.00870553	0.00040568	0.00131004	0.0074171	0.00767263	0.0228785	0.111928	0.0419108	0.00077101	0	0.0602663	0.00650462	0.000757002
25.51	0.00794852	0.00040568	0.00131004	0.0069808	0.00818414	0.0237105	0.11152	0.0419108	0.00077101	0.000267594	0.0606167	0.00718932	0.000757002
25.532	0.00757002	0.00040568	0.00131004	0.0069808	0.00869565	0.0245424	0.110703	0.0423614	0.00115652	0.000267594	0.0613174	0.00787402	0.000378501
25.554	0.00719152	0.00040568	0.000873362	0.0069808	0.00920716	0.0253744	0.110294	0.0423614	0.00115652	0.000535189	0.0620182	0.00855871	0.000378501
25.575	0.00643452	0	0.000873362	0.0069808	0.00971867	0.0257903	0.109886	0.0428121	0.00154202	0.000802783	0.062719	0.00924341	0.000378501
25.597	0.00605602	0	0.000873362	0.0065445	0.0107417	0.0266223	0.109477	0.0428121	0.00154202	0.000802783	0.0630694	0.00992811	0.000378501
25.619	0.00567752	0.00040568	0.000873362	0.0065445	0.0112532	0.0274542	0.10866	0.0432627	0.00192753	0.00107038	0.0637701	0.0106128	0
25.641	0.00529902	0.00040568	0.000873362	0.0065445	0.0117647	0.0282862	0.108252	0.0432627	0.00231303	0.00160557	0.0644709	0.0112975	0
25.662	0.00492051	0.00040568	0.000873362	0.0065445	0.0127877	0.0291181	0.107843	0.0437134	0.00269854	0.00187316	0.0651717	0.0119822	0
25.684	0.00454201	0.00040568	0.000436681	0.0061082	0.0132992	0.0299501	0.107435	0.044164	0.00308404	0.00214075	0.0662228	0.0130092	0
25.706	0.00416351	0.00040568	0.000436681	0.0061082	0.0138107	0.030782	0.106618	0.0446147	0.00308404	0.00267594	0.0669236	0.0136939	0
25.728	0.00378501	0.00040568	0.000436681	0.0061082	0.0148338	0.031614	0.106209	0.0446147	0.00346955	0.00321113	0.0676244	0.014721	0.000378501
25.75	0.00340651	0.00040568	0.000436681	0.0056719	0.0153453	0.0324459	0.105801	0.0450653	0.00385505	0.00374632	0.0686755	0.0154057	0.000378501
25.771	0.00302801	0.000811359	0.000436681	0.0056719	0.0163683	0.0328619	0.105392	0.045516	0.00424056	0.00428151	0.0693763	0.0164327	0.000378501
25.793	0.00264951	0.000811359	0.000436681	0.0056719	0.0168798	0.0336938	0.104984	0.0459667	0.00462606	0.0048167	0.0704275	0.0171174	0.000378501
25.815	0.00227101	0.000811359	0.000436681	0.0052356	0.0179028	0.0345258	0.104575	0.0464173	0.00501157	0.00535189	0.0711282	0.0181445	0.000757002
25.837	0.00227101	0.00121704	0.000436681	0.0052356	0.0184143	0.0353577	0.104167	0.046868	0.00578258	0.00588708	0.0721794	0.0191715	0.000757002
25.858	0.00189251	0.00121704	0	0.0052356	0.0194373	0.0361897	0.10335	0.0473186	0.00616808	0.00668986	0.0732306	0.0198562	0.000757002
25.88	0.001514	0.00121704	0	0.0047993	0.0199488	0.0370216	0.102941	0.0477693	0.00655359	0.00749264	0.0742817	0.0208833	0.0011355
25.902	0.001514	0.00162272	0	0.0047993	0.0209719	0.0378536	0.102533	0.0482199	0.00693909	0.00802783	0.0753329	0.0219103	0.0011355
25.924	0.0011355	0.00162272	0	0.004363	0.0214834	0.0382696	0.102124	0.0486706	0.0077101	0.00883061	0.076384	0.0229374	0.001514
25.946	0.0011355	0.0020284	0	0.004363	0.0225064	0.0391015	0.101716	0.0491212	0.00809561	0.0096334	0.0774352	0.0239644	0.001514
25.967	0.000757002	0.00243408	0	0.004363	0.0230179	0.0399334	0.101716	0.0495719	0.00848111	0.0104362	0.0784863	0.0249914	0.00189251
25.989	0.000757002	0.00243408	0	0.0039267	0.0240409	0.0407654	0.101307	0.0504732	0.00925212	0.0115066	0.0795375	0.0260185	0.00227101
26.011	0.000757002	0.00283976	0	0.0039267	0.0245524	0.0415973	0.100899	0.0509238	0.00963763	0.0123093	0.080939	0.0270455	0.00264951
26.033	0.000378501	0.00324544	0	0.0034904	0.0255754	0.0424293	0.10049	0.0513745	0.0104086	0.0133797	0.0819902	0.0280726	0.00264951
26.054	0.000378501	0.00324544	0	0.0034904	0.0265985	0.0428453	0.100082	0.0522758	0.0107941	0.0141825	0.0830413	0.029442	0.00302801
26.076	0.000378501	0.00365112	0	0.0034904	0.02711	0.0436772	0.0996732	0.0527265	0.0115652	0.0152529	0.0844429	0.030469	0.00340651
26.098	0.000378501	0.0040568	0	0.0030541	0.028133	0.0445092	0.0992647	0.0531771	0.0123362	0.0163233	0.085494	0.0314961	0.00378501
26.12	0	0.00446247	0	0.0030541	0.0286445	0.0453411	0.0992647	0.0540784	0.0127217	0.0173936	0.0868956	0.0325231	0.00416351
26.142	0	0.00486815	0	0.0026178	0.0296675	0.046173	0.0988562	0.0545291	0.0134927	0.018464	0.0882971	0.0338925	0.00454201
26.163	0	0.00486815	0	0.0026178	0.030179	0.046589	0.0984477	0.0554304	0.0142637	0.0195344	0.0893483	0.0349195	0.00492051
26.185	0	0.00527383	0	0.0026178	0.031202	0.047421	0.0980392	0.055881	0.0150347	0.0206048	0.0907498	0.0362889	0.00529902
26.207	0	0.00567951	0	0.0021815	0.0317136	0.0482529	0.0980392	0.0567823	0.0154202	0.0216751	0.0921514	0.037316	0.00605602
26.229	0.000378501	0.00608519	0	0.0021815	0.0327366	0.0490849	0.0976307	0.057233	0.0161912	0.0230131	0.0935529	0.0386854	0.00643452
26.25	0.000378501	0.00689655	0	0.0017452	0.0332481	0.0499168	0.0972222	0.0581343	0.0169622	0.0240835	0.0946041	0.0397124	0.00681302
26.272	0.000378501	0.00730223	0	0.0017452	0.0342711	0.0507488	0.0972222	0.0585849	0.0177332	0.0251539	0.0960056	0.0410818	0.00757002
26.294	0.000378501	0.00770791	0	0.0017452	0.0347826	0.0511647	0.0968137	0.0594863	0.0185042	0.0264918	0.0974071	0.0421089	0.00794852
26.316	0.000757002	0.00811359	0	0.0013089	0.0358056	0.0519967	0.0968137	0.0599369	0.0192753	0.0278298	0.0988087	0.0434783	0.00870553
26.338	0.000757002	0.00851927	0	0.0013089	0.0363171	0.0528286	0.0964052	0.0608382	0.0200463	0.0289002	0.10021	0.0448477	0.00908403
26.359	0.000757002	0.00892495	0	0.0013089	0.0368286	0.0536606	0.0964052	0.0612889	0.0208173	0.0302382	0.101612	0.0458747	0.00984103
26.381	0.0011355	0.00973631	0.000436681	0.0013089	0.0378517	0.0544925	0.0959967	0.0621902	0.0219738	0.0315761	0.103013	0.0472441	0.0102195
26.403	0.0011355	0.010142	0.000436681	0.0008726	0.0383632	0.0549085	0.0959967	0.0630915	0.0227448	0.0326465	0.104415	0.0486135	0.0109765
26.425	0.001514	0.0109533	0.000436681	0.0008726	0.0393862	0.0557404	0.0955882	0.0635421	0.0235158	0.0339845	0.106167	0.0499829	0.0117335
26.446	0.001514	0.011359	0.000436681	0.0008726	0.0398977	0.0565724	0.0955882	0.0644434	0.0242868	0.0353225	0.107568	0.0513523	0.0124905
26.468	0.00189251	0.0117647	0.000436681	0.0004363	0.0404092	0.0574043	0.0951797	0.0648941	0.0254433	0.0366604	0.10897	0.0527217	0.0132475
26.49	0.00227101	0.0125761	0.000436681	0.0004363	0.0414322	0.0582363	0.0951797	0.0657954	0.0262143	0.0379984	0.110371	0.0540911	0.0140045
26.512	0.00264951	0.0129817	0.000436681	0.0004363	0.0419437	0.0590682	0.0951797	0.0666967	0.0269854	0.0393364	0.111773	0.0554605	0.0147615
26.534	0.00264951	0.0137931	0.000873362	0.0004363	0.0424552	0.0599002	0.0947712	0.0671474	0.0281419	0.0406743	0.113174	0.0568299	0.0155185
26.555	0.00302801	0.0146045	0.000873362	0.0004363	0.0434783	0.0603161	0.0947712	0.0680487	0.0289129	0.0420123	0.114576	0.0581992	0.0162755
26.577	0.00340651	0.0150101	0.000873362	0.0004363	0.0439898	0.0611481	0.0947712	0.06895	0.0300694	0.0433503	0.116328	0.0595686	0.0170326
26.599	0.00378501	0.0158215	0.000873362	0	0.0445013	0.06198	0.0943627	0.0694006	0.0308404	0.0446883	0.11773	0.060938	0.0177896
26.621	0.00416351	0.0166329	0.000873362	0	0.0450128	0.062812	0.0943627	0.0703019	0.0319969	0.0460262	0.119131	0.0623074	0.0185466
26.642	0.00454201	0.0170385	0.00131004	0	0.0455243	0.0636439	0.0943627	0.0707526	0.0331534	0.0470966	0.120533	0.0640192	0.0196821
26.664	0.00492051	0.0178499	0.00131004	0	0.0465473	0.0644759	0.0943627	0.0716539	0.0339244	0.0484346	0.122285	0.0653886	0.0204391
26.686	0.00529902	0.0186613	0.00131004	0	0.0470588	0.0653078	0.0943627	0.0725552	0.035081	0.0497725	0.123686	0.066758	0.0211961
26.708	0.00605602	0.0194726	0.00131004	0	0.0475703	0.0661398	0.0939542	0.0730059	0.0362375	0.0511105	0.125088	0.0681274	0.0223316
26.73	0.00643452	0.020284	0.00174672	0	0.0480818	0.0669717	0.0939542	0.0739072	0.0370085	0.0524485	0.126489	0.0698391	0.0230886
26.751	0.00681302	0.0210953	0.00174672	0	0.0485934	0.0678037	0.0939542	0.0743578	0.038165	0.0537865	0.128241	0.0712085	0.0242241
26.773	0.00757002	0.021501	0.00174672	0	0.0491049	0.0686356	0.0939542	0.0752591	0.0393215	0.0548568	0.129643	0.0729202	0.0249811
26.795	0.00794852	0.0223124	0.00174672	0	0.0496164	0.0694676	0.0939542	0.0757098	0.040478	0.0561948	0.131044	0.0742896	0.0261166
26.817	0.00870553	0.0231237	0.00218341	0	0.0506394	0.0702995	0.0939542	0.0766111	0.0416345	0.0575328	0.132446	0.0760014	0.0272521
26.838	0.00908403	0.0239351	0.00218341	0.0004363	0.0511509	0.0711314	0.0939542	0.0775124	0.0427911	0.0586032	0.134198	0.0773708	0.0280091
26.86	0.00984103	0.0247465	0.00218341	0.0004363	0.0516624	0.0719634	0.0939542	0.077963	0.0435621	0.0599411	0.135599	0.0790825	0.0291446
26.882	0.0102195	0.0255578	0.00262009	0.0004363	0.0521739	0.0727953	0.0939542	0.0788644	0.0447186	0.0610115	0.137001	0.0804519	0.0302801
26.904	0.0109765	0.0267748	0.00262009	0.0004363	0.0526854	0.0736273	0.0935458	0.079315	0.0458751	0.0623495	0.138402	0.0821636	0.0314156
26.926	0.0117335	0.0275862	0.00262009	0.0004363	0.0531969	0.0744592	0.0935458	0.0802163	0.0470316	0.0634199	0.140154	0.083533	0.0325511
26.947	0.0124905	0.0283976	0.00305677	0.0008726	0.0537084	0.0752912	0.0935458	0.080667	0.0481881	0.0647578	0.141556	0.0852448	0.0333081
26.969	0.0132475	0.0292089	0.00305677	0.0008726	0.0542199	0.0761231	0.0935458	0.0811176	0.0493446	0.0658282	0.142957	0.0869565	0.0344436
26.991	0.0140045	0.0300203	0.00305677	0.0008726	0.0547315	0.0769551	0.0935458	0.0820189	0.0505012	0.0668986	0.144359	0.0886683	0.0355791
27.013	0.0147615	0.0308316	0.00349345	0.0013089	0.0547315	0.077787	0.0935458	0.0824696	0.0520432	0.067969	0.14576	0.0900377	0.0367146
27.034	0.0155185	0.0320487	0.00349345	0.0013089	0.055243	0.078619	0.0935458	0.0833709	0.0531997	0.0690393	0.147512	0.0917494	0.0378501
27.056	0.0162755	0.03286	0.00349345	0.0013089	0.0557545	0.0794509	0.0939542	0.0838215	0.0543562	0.0701097	0.148914	0.0934611	0.0389856
27.078	0.0170326	0.0336714	0.00393013	0.0017452	0.056266	0.0802829	0.0939542	0.0842722	0.0555127	0.0711801	0.150315	0.0951729	0.0401211
27.1	0.0177896	0.0344828	0.00393013	0.0017452	0.0567775	0.0811148	0.0939542	0.0851735	0.0566692	0.0722505	0.151717	0.0965423	0.0412566
27.122	0.0185466	0.0356998	0.00393013	0.0021815	0.057289	0.0819468	0.0939542	0.0856242	0.0578258	0.0733208	0.153118	0.098254	0.0423921
27.143	0.0196821	0.0365112	0.00436681	0.0021815	0.0578005	0.0827787	0.0939542	0.0860748	0.0589823	0.0741236	0.15452	0.0999658	0.0435276
27.165	0.0204391	0.0377282	0.00436681	0.0026178	0.0578005	0.0836106	0.0939542	0.0869761	0.0605243	0.075194	0.156272	0.101678	0.0446631
27.187	0.0211961	0.0385396	0.00436681	0.0030541	0.058312	0.0844426	0.0939542	0.0874268	0.0616808	0.0759968	0.157673	0.103389	0.0457986
27.209	0.0223316	0.0393509	0.00480349	0.0030541	0.0588235	0.0852745	0.0939542	0.0878774	0.0628373	0.0770672	0.159075	0.105101	0.0473126
27.23	0.0230886	0.040568	0.00480349	0.0034904	0.059335	0.0861065	0.0939542	0.0883281	0.0639938	0.0778699	0.160477	0.10647	0.0484481
27.252	0.0242241	0.0413793	0.00480349	0.0034904	0.0598465	0.0869384	0.0939542	0.0887787	0.0655359	0.0786727	0.161878	0.108182	0.0495836
27.274	0.0249811	0.0425963	0.00524017	0.0039267	0.0598465	0.0877704	0.0939542	0.0892294	0.0666924	0.0797431	0.16328	0.109894	0.0507192
27.296	0.0261166	0.0438134	0.00524017	0.004363	0.0603581	0.0886023	0.0939542	0.0901307	0.0678489	0.0805459	0.164681	0.111606	0.0518547
27.318	0.0272521	0.0446247	0.00524017	0.0047993	0.0608696	0.0894343	0.0939542	0.0905813	0.0690054	0.0813487	0.166083	0.113317	0.0533687
27.339	0.0280091	0.0458418	0.00567686	0.0047993	0.0613811	0.0902662	0.0943627	0.091032	0.0705474	0.0821515	0.167484	0.115029	0.0545042
27.361	0.0291446	0.0466531	0.00567686	0.0052356	0.0613811	0.0910982	0.0943627	0.0914826	0.0717039	0.0826866	0.168886	0.116741	0.0556397
27.383	0.0302801	0.0478702	0.00567686	0.0056719	0.0618926	0.0919301	0.0943627	0.0919333	0.0728604	0.0834894	0.170287	0.11811	0.0567752
27.405	0.0314156	0.0490872	0.00611354	0.0061082	0.0624041	0.0927621	0.0943627	0.092384	0.074017	0.0842922	0.171689	0.119822	0.0579107
27.426	0.0325511	0.0503043	0.00611354	0.0065445	0.0629156	0.093594	0.0943627	0.092384	0.075559	0.0848274	0.17309	0.121534	0.0594247
27.448	0.0333081	0.0511156	0.00611354	0.0069808	0.0629156	0.094426	0.0943627	0.0928346	0.0767155	0.0856302	0.174142	0.123245	0.0605602
27.47	0.0344436	0.0523327	0.00611354	0.0074171	0.0634271	0.0952579	0.0943627	0.0932853	0.077872	0.0861654	0.175543	0.124957	0.0616957
27.492	0.0355791	0.0535497	0.00655022	0.0074171	0.0639386	0.0956739	0.0947712	0.0937359	0.079414	0.0869682	0.176945	0.126669	0.0628312
27.514	0.0367146	0.0547667	0.00655022	0.0078534	0.0639386	0.0965058	0.0947712	0.0941866	0.0805705	0.0875033	0.178346	0.128038	0.0643452
27.535	0.0378501	0.0559838	0.00655022	0.0082897	0.0644501	0.0973378	0.0947712	0.0946372	0.0817271	0.0880385	0.179397	0.12975	0.0654807
27.557	0.0389856	0.0572008	0.00655022	0.008726	0.0649616	0.0981697	0.0947712	0.0946372	0.0828836	0.0888413	0.180799	0.131462	0.0666162
27.579	0.0401211	0.0584178	0.0069869	0.0091623	0.0649616	0.0985857	0.0947712	0.0950879	0.0844256	0.0893765	0.1822	0.133174	0.0681302
27.601	0.0412566	0.0596349	0.0069869	0.0095986	0.0654731	0.0994176	0.0947712	0.0955385	0.0855821	0.0899117	0.183252	0.134543	0.0692657
27.623	0.0423921	0.0608519	0.0069869	0.0100349	0.0659847	0.10025	0.0947712	0.0955385	0.0867386	0.0904469	0.184653	0.136255	0.0704012
27.644	0.0435276	0.062069	0.0069869	0.0109075	0.0659847	0.100666	0.0951797	0.0959892	0.0878951	0.0909821	0.185704	0.137966	0.0715367
27.666	0.0446631	0.063286	0.0069869	0.0113438	0.0664962	0.101498	0.0951797	0.0959892	0.0894372	0.0915173	0.187106	0.139336	0.0730507
27.688	0.0457986	0.064503	0.00742358	0.0117801	0.0670077	0.101913	0.0951797	0.0964398	0.0905937	0.0920524	0.188157	0.141048	0.0741862
27.71	0.0473126	0.0657201	0.00742358	0.0122164	0.0670077	0.102745	0.0951797	0.0964398	0.0917502	0.0925876	0.189559	0.142417	0.0753217
27.731	0.0484481	0.0669371	0.00742358	0.0126527	0.0675192	0.103161	0.0951797	0.0964398	0.0929067	0.0928552	0.19061	0.144129	0.0764572
27.753	0.0495836	0.0681542	0.00742358	0.013089	0.0675192	0.103993	0.0951797	0.0968905	0.0944487	0.0933904	0.192011	0.145498	0.0779712
27.775	0.0507192	0.0693712	0.00742358	0.0135253	0.0680307	0.104409	0.0955882	0.0968905	0.0956052	0.0939256	0.193062	0.14721	0.0791067
27.797	0.0518547	0.0705882	0.00742358	0.0143979	0.0685422	0.105241	0.0955882	0.0968905	0.0967618	0.0944608	0.194114	0.148579	0.0802422
27.819	0.0533687	0.072211	0.00786026	0.0148342	0.0685422	0.105657	0.0955882	0.0973411	0.0979183	0.0947284	0.195165	0.149949	0.0813777
27.84	0.0545042	0.073428	0.00786026	0.0152705	0.0690537	0.106073	0.0955882	0.0973411	0.0990748	0.0952636	0.196566	0.15166	0.0828917
27.862	0.0556397	0.074645	0.00786026	0.0157068	0.0695652	0.106489	0.0955882	0.0973411	0.100231	0.0957988	0.197617	0.15303	0.0840273
27.884	0.0567752	0.0758621	0.00786026	0.0165794	0.0695652	0.107321	0.0959967	0.0973411	0.101388	0.0960664	0.198669	0.154399	0.0851628
27.906	0.0579107	0.0774848	0.00786026	0.0170157	0.0700767	0.107737	0.0959967	0.0973411	0.102544	0.0966016	0.19972	0.156111	0.0862983
27.927	0.0594247	0.0787018	0.00786026	0.017452	0.0700767	0.108153	0.0959967	0.0973411	0.103701	0.0968691	0.200771	0.15748	0.0874338
27.949	0.0605602	0.0799189	0.00786026	0.0178883	0.0705882	0.108569	0.0959967	0.0973411	0.104857	0.0974043	0.201822	0.15885	0.0885693
27.971	0.0616957	0.0815416	0.00786026	0.0187609	0.0710997	0.108985	0.0959967	0.0973411	0.106014	0.0976719	0.202873	0.160219	0.0900833
27.993	0.0628312	0.0827586	0.00829694	0.0191972	0.0710997	0.109401	0.0964052	0.0973411	0.10717	0.0982071	0.203924	0.161588	0.0912188
28.015	0.0643452	0.0839757	0.00829694	0.0196335	0.0716113	0.109817	0.0964052	0.0973411	0.108327	0.0984747	0.204975	0.162958	0.0923543
28.036	0.0654807	0.0855984	0.00829694	0.0205061	0.0716113	0.110233	0.0964052	0.0973411	0.109483	0.0990099	0.206027	0.164327	0.0934898
28.058	0.0666162	0.0868154	0.00829694	0.0209424	0.0721228	0.110649	0.0964052	0.0973411	0.11064	0.0992775	0.206727	0.165697	0.0946253
28.08	0.0681302	0.0880325	0.00829694	0.021815	0.0721228	0.111065	0.0968137	0.0968905	0.111411	0.0998127	0.207779	0.166724	0.0957608
28.102	0.0692657	0.0896552	0.00829694	0.0222513	0.0726343	0.111065	0.0968137	0.0968905	0.112567	0.10008	0.20883	0.168093	0.0968963
28.123	0.0704012	0.0908722	0.00829694	0.0226876	0.0726343	0.111481	0.0968137	0.0968905	0.113724	0.100615	0.20953	0.169463	0.0980318
28.145	0.0715367	0.0920892	0.00873362	0.0235602	0.0731458	0.111897	0.0968137	0.0964398	0.114495	0.100883	0.210582	0.17049	0.0991673
28.167	0.0730507	0.093712	0.00873362	0.0239965	0.0731458	0.112313	0.0972222	0.0964398	0.115652	0.101151	0.211282	0.171859	0.100303
28.189	0.0741862	0.094929	0.00873362	0.0248691	0.0736573	0.112313	0.0972222	0.0959892	0.116423	0.101686	0.212334	0.172886	0.101438
28.211	0.0753217	0.096146	0.00873362	0.0253054	0.0736573	0.112729	0.0972222	0.0959892	0.117579	0.101953	0.213034	0.174255	0.102574
28.232	0.0764572	0.0977688	0.00873362	0.0257417	0.0741688	0.112729	0.0976307	0.0955385	0.11835	0.102221	0.214085	0.175282	0.103709
28.254	0.0779712	0.0989858	0.00917031	0.0266143	0.0741688	0.113145	0.0976307	0.0955385	0.119507	0.102756	0.214786	0.176652	0.104845
28.276	0.0791067	0.100609	0.00917031	0.0270506	0.0746803	0.113145	0.0976307	0.0950879	0.120278	0.103024	0.215487	0.177679	0.105602
28.298	0.0802422	0.101826	0.00917031	0.0279232	0.0746803	0.113561	0.0976307	0.0946372	0.121049	0.103291	0.216538	0.178706	0.106737
28.319	0.0813777	0.103043	0.00917031	0.0283595	0.0751918	0.113561	0.0980392	0.0946372	0.12182	0.103559	0.217239	0.179733	0.107873
28.341	0.0828917	0.104665	0.00960699	0.0292321	0.0751918	0.113977	0.0980392	0.0941866	0.122976	0.104094	0.21794	0.18076	0.109008
28.363	0.0840273	0.105882	0.00960699	0.0296684	0.0751918	0.113977	0.0980392	0.0937359	0.123747	0.104362	0.218641	0.181787	0.109765
28.385	0.0851628	0.107099	0.00960699	0.0301047	0.0757033	0.113977	0.0984477	0.0937359	0.124518	0.104629	0.219341	0.182814	0.110901
28.407	0.0862983	0.108722	0.0100437	0.0309773	0.0757033	0.113977	0.0984477	0.0932853	0.125289	0.104897	0.220042	0.183499	0.112036
28.428	0.0874338	0.109939	0.0100437	0.0314136	0.0762148	0.114393	0.0988562	0.0928346	0.12606	0.105165	0.220743	0.184526	0.112793
28.45	0.0885693	0.111156	0.0104803	0.0322862	0.0762148	0.114393	0.0988562	0.092384	0.126831	0.105432	0.221444	0.185553	0.113929
28.472	0.0900833	0.112779	0.0104803	0.0327225	0.0762148	0.114393	0.0988562	0.0919333	0.127217	0.1057	0.222144	0.186238	0.115064
28.494	0.0912188	0.113996	0.010917	0.0335951	0.0767263	0.114393	0.0992647	0.0914826	0.127988	0.105967	0.222845	0.187265	0.115821
28.515	0.0923543	0.115213	0.010917	0.0340314	0.0767263	0.114393	0.0992647	0.091032	0.128759	0.106235	0.223196	0.187949	0.116957
28.537	0.0934898	0.11643	0.0113537	0.034904	0.0767263	0.114809	0.0992647	0.0905813	0.12953	0.106503	0.223896	0.188634	0.117714
28.559	0.0946253	0.118053	0.0113537	0.0353403	0.0772379	0.114809	0.0996732	0.0901307	0.129915	0.10677	0.224597	0.189319	0.118471
28.581	0.0957608	0.11927	0.0117904	0.0357766	0.0772379	0.114809	0.0996732	0.08968	0.130686	0.107038	0.224947	0.190346	0.119606
28.603	0.0968963	0.120487	0.0122271	0.0366492	0.0772379	0.114809	0.100082	0.0892294	0.131072	0.107038	0.225648	0.19103	0.120363
28.624	0.0980318	0.121704	0.0122271	0.0370855	0.0777494	0.114809	0.100082	0.0887787	0.131843	0.107305	0.225999	0.191715	0.12112
28.646	0.0991673	0.122921	0.0126638	0.0379581	0.0777494	0.114809	0.10049	0.0883281	0.132228	0.107573	0.226699	0.1924	0.122256
28.668	0.100303	0.124138	0.0131004	0.0383944	0.0777494	0.114809	0.10049	0.0874268	0.132999	0.107573	0.22705	0.192742	0.123013
28.69	0.101438	0.125355	0.0135371	0.0388307	0.0782609	0.114809	0.100899	0.0869761	0.133385	0.107841	0.2274	0.193427	0.12377
28.711	0.102574	0.126572	0.0139738	0.0397033	0.0782609	0.114809	0.100899	0.0865255	0.13377	0.107841	0.228101	0.194112	0.124905
28.733	0.103709	0.127789	0.0144105	0.0401396	0.0782609	0.114809	0.101307	0.0860748	0.134156	0.108108	0.228451	0.194796	0.125662
28.755	0.104845	0.129006	0.0148472	0.0410122	0.0787724	0.114809	0.101307	0.0856242	0.134927	0.108108	0.228802	0.195139	0.126419
28.777	0.105602	0.130223	0.0148472	0.0414485	0.0787724	0.114809	0.101716	0.0847228	0.135312	0.108108	0.229152	0.195823	0.127176
28.799	0.106737	0.13144	0.0157205	0.0418848	0.0787724	0.114809	0.101716	0.0842722	0.135698	0.108108	0.229502	0.196166	0.127933
28.82	0.107873	0.132657	0.0161572	0.0427574	0.0792839	0.114809	0.102124	0.0838215	0.136083	0.108108	0.229853	0.196508	0.12869
28.842	0.109008	0.133874	0.0165939	0.0431937	0.0792839	0.114393	0.102124	0.0833709	0.136469	0.108108	0.230203	0.197193	0.129447
28.864	0.109765	0.135091	0.0170306	0.0440663	0.0792839	0.114393	0.102533	0.0824696	0.136854	0.108108	0.230554	0.197535	0.130204
28.886	0.110901	0.136308	0.0174672	0.0445026	0.0797954	0.114393	0.102533	0.0820189	0.13724	0.108108	0.230554	0.197877	0.130961
28.907	0.112036	0.137525	0.0179039	0.0449389	0.0797954	0.114393	0.102941	0.0815683	0.13724	0.108108	0.230904	0.19822	0.131718
28.929	0.112793	0.138337	0.0187773	0.0458115	0.0797954	0.114393	0.102941	0.080667	0.137625	0.108108	0.231254	0.198562	0.132475
28.951	0.113929	0.139554	0.019214	0.0462478	0.0797954	0.114393	0.10335	0.0802163	0.138011	0.107841	0.231254	0.198904	0.133232
28.973	0.115064	0.140771	0.0196507	0.0466841	0.0803069	0.114393	0.103758	0.0797657	0.138396	0.107841	0.231605	0.199247	0.133989
28.995	0.115821	0.141582	0.020524	0.0475567	0.0803069	0.114393	0.103758	0.0788644	0.138396	0.107573	0.231955	0.199589	0.134746
29.016	0.116957	0.142799	0.0209607	0.047993	0.0803069	0.113977	0.104167	0.0784137	0.138782	0.107573	0.231955	0.199932	0.135503
29.038	0.117714	0.143611	0.0218341	0.0484293	0.0808184	0.113977	0.104575	0.077963	0.139167	0.107305	0.231955	0.200274	0.13626
29.06	0.118471	0.144828	0.0222707	0.0493019	0.0808184	0.113977	0.104575	0.0775124	0.139167	0.107038	0.232306	0.200616	0.137017
29.082	0.119606	0.145639	0.0231441	0.0497382	0.0808184	0.113977	0.104984	0.0766111	0.139553	0.107038	0.232306	0.200616	0.137774
29.103	0.120363	0.146856	0.0240175	0.0501745	0.0813299	0.113977	0.105392	0.0761604	0.139553	0.10677	0.232306	0.200959	0.138531
29.125	0.12112	0.147667	0.0244541	0.0506108	0.0813299	0.113977	0.105801	0.0757098	0.139938	0.106503	0.232656	0.201301	0.13891
29.147	0.122256	0.148884	0.0253275	0.0514834	0.0813299	0.113561	0.105801	0.0748085	0.139938	0.105967	0.232656	0.201301	0.139667
29.169	0.123013	0.149696	0.0262009	0.0519197	0.0818414	0.113561	0.106209	0.0743578	0.140324	0.1057	0.232656	0.201643	0.140424
29.191	0.12377	0.150507	0.0270742	0.052356	0.0818414	0.113561	0.106618	0.0739072	0.140324	0.105432	0.232656	0.201643	0.141181
29.212	0.124905	0.151318	0.0279476	0.0527923	0.0823529	0.113561	0.107026	0.0734565	0.140324	0.104897	0.232656	0.201986	0.141938
29.234	0.125662	0.152535	0.028821	0.0536649	0.0823529	0.113561	0.107435	0.0725552	0.140709	0.104629	0.232656	0.201986	0.142316
29.256	0.126419	0.153347	0.0292576	0.0541012	0.0823529	0.113145	0.107843	0.0721046	0.140709	0.104094	0.233006	0.202328	0.143073
29.278	0.127176	0.154158	0.0305677	0.0545375	0.0828645	0.113145	0.107843	0.0716539	0.140709	0.103827	0.233006	0.202328	0.14383
29.299	0.127933	0.15497	0.031441	0.0549738	0.0828645	0.113145	0.108252	0.0712032	0.141095	0.103291	0.232656	0.202328	0.144587
29.321	0.12869	0.155781	0.0323144	0.0558464	0.0828645	0.113145	0.10866	0.0707526	0.141095	0.102756	0.232656	0.20267	0.144966
29.343	0.129447	0.156592	0.0331878	0.0562827	0.083376	0.113145	0.109069	0.0698513	0.141095	0.102221	0.232656	0.20267	0.145723
29.365	0.130204	0.157404	0.0340611	0.056719	0.083376	0.112729	0.109477	0.0694006	0.141095	0.101686	0.232656	0.20267	0.14648
29.387	0.130961	0.157809	0.0349345	0.0571553	0.0838875	0.112729	0.109886	0.06895	0.14148	0.101151	0.232656	0.203013	0.147237
29.408	0.131718	0.158621	0.0358079	0.0575916	0.0838875	0.112729	0.110703	0.0684993	0.14148	0.100615	0.232656	0.203013	0.147615
29.43	0.132475	0.159432	0.0371179	0.0580279	0.0838875	0.112729	0.111111	0.0680487	0.14148	0.10008	0.232656	0.203013	0.148372
29.452	0.133232	0.160243	0.0379913	0.0589005	0.084399	0.112313	0.11152	0.067598	0.14148	0.0992775	0.232656	0.203013	0.149129
29.474	0.133989	0.160649	0.0388646	0.0593368	0.084399	0.112313	0.111928	0.0671474	0.14148	0.0987423	0.232656	0.203355	0.149886
29.495	0.134746	0.16146	0.0401747	0.0597731	0.0849105	0.112313	0.112337	0.0671474	0.14148	0.0982071	0.232306	0.203355	0.150265
29.517	0.135503	0.162272	0.041048	0.0602094	0.0849105	0.111897	0.112745	0.0666967	0.141866	0.0974043	0.232306	0.203355	0.151022
29.539	0.13626	0.162677	0.0423581	0.0606457	0.085422	0.111897	0.113562	0.0662461	0.141866	0.0968691	0.232306	0.203355	0.151779
29.561	0.137017	0.163489	0.0432314	0.061082	0.085422	0.111897	0.113971	0.0657954	0.141866	0.0960664	0.232306	0.203355	0.152157
29.583	0.137774	0.163895	0.0445415	0.0615183	0.0859335	0.111897	0.114379	0.0653447	0.141866	0.0952636	0.232306	0.203697	0.152914
29.604	0.138531	0.164706	0.0454148	0.0619546	0.0859335	0.111481	0.115196	0.0653447	0.141866	0.0947284	0.231955	0.203697	0.153671
29.626	0.13891	0.165112	0.0467249	0.0623909	0.086445	0.111481	0.115605	0.0648941	0.141866	0.0939256	0.231955	0.203697	0.154428
29.648	0.139667	0.165517	0.0475983	0.0628272	0.086445	0.111481	0.116422	0.0648941	0.142251	0.0931228	0.231955	0.203697	0.154807
29.67	0.140424	0.166329	0.0489083	0.0632635	0.0869565	0.111065	0.11683	0.0644434	0.142251	0.09232	0.231955	0.203697	0.155564
29.691	0.141181	0.166734	0.0502183	0.0636998	0.0869565	0.111065	0.117647	0.0644434	0.142251	0.0915173	0.231955	0.203697	0.156321
29.713	0.141938	0.16714	0.0510917	0.0641361	0.087468	0.111065	0.118056	0.0639928	0.142251	0.0907145	0.231955	0.203697	0.156699
29.735	0.142316	0.167546	0.0524017	0.0645724	0.087468	0.110649	0.118873	0.0639928	0.142251	0.0901793	0.231605	0.20404	0.157456
29.757	0.143073	0.168357	0.0537118	0.0650087	0.0879795	0.110649	0.11969	0.0639928	0.142637	0.0893765	0.231605	0.20404	0.158213
29.779	0.14383	0.168763	0.0545852	0.065445	0.0879795	0.110649	0.120098	0.0635421	0.142637	0.0885737	0.231605	0.20404	0.158592
29.8	0.144587	0.169168	0.0558952	0.0658813	0.088491	0.110233	0.120915	0.0635421	0.142637	0.0877709	0.231605	0.20404	0.159349
29.822	0.144966	0.169574	0.0572052	0.0663176	0.0890026	0.110233	0.121732	0.0635421	0.142637	0.0869682	0.231605	0.20404	0.160106
29.844	0.145723	0.16998	0.0585153	0.0667539	0.0890026	0.110233	0.122549	0.0635421	0.143022	0.0861654	0.231605	0.20404	0.160863
29.866	0.14648	0.170385	0.0593886	0.0671902	0.0895141	0.110233	0.122958	0.0635421	0.143022	0.0853626	0.231605	0.204382	0.161241
29.887	0.147237	0.170791	0.0606987	0.0671902	0.0895141	0.109817	0.123775	0.0635421	0.143022	0.0845598	0.231605	0.204382	0.161998
29.909	0.147615	0.171197	0.0620087	0.0676265	0.0900256	0.109817	0.124592	0.0635421	0.143408	0.083757	0.231605	0.204382	0.162755
29.931	0.148372	0.171602	0.0628821	0.0680628	0.0905371	0.109817	0.125408	0.0639928	0.143408	0.0832218	0.231605	0.204382	0.163134
29.953	0.149129	0.172008	0.0641921	0.0684991	0.0905371	0.109401	0.126225	0.0639928	0.143408	0.0824191	0.231605	0.204382	0.163891
29.975	0.149886	0.172414	0.0655022	0.0689354	0.0910486	0.109401	0.127042	0.0639928	0.143793	0.0816163	0.231605	0.204382	0.164648
29.996	0.150265	0.172819	0.0668122	0.0693717	0.0910486	0.109401	0.127859	0.0644434	0.143793	0.0808135	0.231605	0.204724	0.165405
30.018	0.151022	0.173225	0.0676856	0.0693717	0.0915601	0.108985	0.128676	0.0644434	0.144179	0.0802783	0.231955	0.204724	0.165783
30.04	0.151779	0.173631	0.0689956	0.069808	0.0920716	0.108985	0.129493	0.0644434	0.144179	0.0794755	0.231955	0.204724	0.16654
30.062	0.152157	0.174037	0.0703057	0.0702443	0.0920716	0.108985	0.13031	0.0648941	0.144564	0.0786727	0.231955	0.204724	0.167298
30.083	0.152914	0.174442	0.0716157	0.0706806	0.0925831	0.108569	0.131127	0.0653447	0.144564	0.0781375	0.231955	0.205067	0.167676
30.105	0.153671	0.174848	0.0724891	0.0706806	0.0930946	0.108569	0.131944	0.0653447	0.14495	0.0773348	0.231955	0.205067	0.168433
30.127	0.154428	0.175254	0.0737991	0.0711169	0.0930946	0.108569	0.13317	0.0657954	0.14495	0.0767996	0.232306	0.205067	0.16919
30.149	0.154807	0.175659	0.0751092	0.0715532	0.0936061	0.108569	0.133987	0.0662461	0.145335	0.0762644	0.232306	0.205409	0.169569
30.171	0.155564	0.175659	0.0764192	0.0715532	0.0936061	0.108153	0.134804	0.0666967	0.145335	0.0757292	0.232306	0.205409	0.170326
30.192	0.156321	0.176065	0.0772926	0.0719895	0.0941176	0.108153	0.135621	0.0671474	0.145721	0.0749264	0.232656	0.205409	0.171083
30.214	0.156699	0.176471	0.0786026	0.0724258	0.0946292	0.108153	0.136846	0.0671474	0.146106	0.0743912	0.232656	0.205409	0.171461
30.236	0.157456	0.176876	0.0799127	0.0724258	0.0946292	0.108153	0.137663	0.067598	0.146106	0.073856	0.233006	0.205751	0.172218
30.258	0.158213	0.177282	0.080786	0.0728621	0.0951407	0.108153	0.13848	0.0680487	0.146492	0.0735884	0.233006	0.205751	0.172975
30.279	0.158592	0.177688	0.0820961	0.0728621	0.0951407	0.108153	0.139297	0.06895	0.146492	0.0730533	0.233357	0.206094	0.173354
30.301	0.159349	0.178093	0.0834061	0.0732984	0.0956522	0.107737	0.140523	0.0694006	0.146877	0.0725181	0.233357	0.206094	0.174111
30.323	0.160106	0.178093	0.0842795	0.0737347	0.0956522	0.107737	0.14134	0.0698513	0.147263	0.0722505	0.233707	0.206094	0.174868
30.345	0.160863	0.178499	0.0855895	0.0737347	0.0961637	0.107737	0.142157	0.0703019	0.147263	0.0717153	0.233707	0.206436	0.175246
30.367	0.161241	0.178905	0.0868996	0.0737347	0.0961637	0.107737	0.143382	0.0707526	0.147648	0.0714477	0.234057	0.206436	0.176003
30.388	0.161998	0.17931	0.0877729	0.074171	0.0966752	0.107737	0.144199	0.0716539	0.148034	0.0711801	0.234408	0.206779	0.176382
30.41	0.162755	0.179716	0.089083	0.074171	0.0966752	0.107737	0.145016	0.0721046	0.148034	0.0706449	0.234408	0.206779	0.177139
30.432	0.163134	0.180122	0.090393	0.0746073	0.0971867	0.107737	0.145833	0.0725552	0.148419	0.0703773	0.234758	0.207121	0.177517
30.454	0.163891	0.180527	0.0912664	0.0746073	0.0971867	0.107737	0.147059	0.0734565	0.148805	0.0703773	0.235109	0.207121	0.178274
30.475	0.164648	0.180527	0.0925764	0.0750436	0.0976982	0.107737	0.147876	0.0739072	0.14919	0.0701097	0.235459	0.207463	0.178653
30.497	0.165405	0.180933	0.0934498	0.0750436	0.0976982	0.107737	0.148693	0.0748085	0.14919	0.0698421	0.235459	0.207806	0.17941
30.519	0.165783	0.181339	0.0947598	0.0750436	0.0976982	0.107737	0.14951	0.0752591	0.149576	0.0695745	0.235809	0.207806	0.179788
30.541	0.16654	0.181744	0.0956332	0.0754799	0.0982097	0.107737	0.150327	0.0761604	0.149961	0.0695745	0.23616	0.208148	0.180545
30.563	0.167298	0.18215	0.0969432	0.0754799	0.0982097	0.107737	0.151552	0.0766111	0.149961	0.0695745	0.23651	0.208148	0.180924
30.584	0.167676	0.182556	0.0978166	0.0754799	0.0987212	0.107737	0.152369	0.0775124	0.150347	0.0693069	0.236861	0.20849	0.181681
30.606	0.168433	0.182961	0.0991266	0.0754799	0.0987212	0.107737	0.153186	0.0784137	0.150732	0.0693069	0.236861	0.208833	0.182059
30.628	0.16919	0.183367	0.1	0.0759162	0.0987212	0.107737	0.154003	0.0788644	0.150732	0.0693069	0.237211	0.209175	0.182438
30.65	0.169569	0.183367	0.10131	0.0759162	0.0987212	0.107737	0.15482	0.0797657	0.151118	0.0693069	0.237561	0.209175	0.182816
30.672	0.170326	0.183773	0.102183	0.0759162	0.0992327	0.107737	0.155637	0.0802163	0.151503	0.0695745	0.237912	0.209517	0.183573
30.693	0.171083	0.184178	0.103057	0.0759162	0.0992327	0.108153	0.156454	0.0811176	0.151503	0.0695745	0.238262	0.20986	0.183952
30.715	0.171461	0.184584	0.104367	0.0759162	0.0992327	0.108153	0.157271	0.0820189	0.151889	0.0695745	0.238612	0.210202	0.18433
30.737	0.172218	0.18499	0.10524	0.0759162	0.0992327	0.108153	0.15768	0.0829202	0.152274	0.0698421	0.238963	0.210202	0.184709
30.759	0.172975	0.185396	0.10655	0.0759162	0.0992327	0.108153	0.158497	0.0833709	0.152274	0.0701097	0.239313	0.210544	0.185466
30.78	0.173354	0.185801	0.107424	0.0763525	0.0992327	0.108153	0.159314	0.0842722	0.15266	0.0701097	0.239664	0.210887	0.185844
30.802	0.174111	0.186207	0.108297	0.0763525	0.0997442	0.108153	0.160131	0.0851735	0.15266	0.0703773	0.239664	0.211229	0.186223
30.824	0.174868	0.186613	0.10917	0.0763525	0.0997442	0.108569	0.160539	0.0856242	0.153045	0.0706449	0.240014	0.211571	0.186601
30.846	0.175246	0.187018	0.11048	0.0763525	0.0997442	0.108569	0.161356	0.0865255	0.153045	0.0709125	0.240364	0.211914	0.18698
30.868	0.176003	0.187018	0.111354	0.0763525	0.0997442	0.108569	0.161765	0.0874268	0.153431	0.0711801	0.240715	0.212256	0.187358
30.889	0.176382	0.187424	0.112227	0.0763525	0.0997442	0.108569	0.162582	0.0883281	0.153431	0.0717153	0.241065	0.212256	0.187737
30.911	0.177139	0.18783	0.1131	0.0763525	0.0997442	0.108569	0.16299	0.0887787	0.153431	0.0719829	0.241416	0.212598	0.188115
30.933	0.177517	0.188235	0.11441	0.0763525	0.0997442	0.108985	0.163399	0.08968	0.153816	0.0722505	0.241766	0.212941	0.188494
30.955	0.178274	0.188641	0.115284	0.0763525	0.0992327	0.108985	0.164216	0.0905813	0.153816	0.0727857	0.242116	0.213283	0.188872
30.976	0.178653	0.189047	0.116157	0.0763525	0.0992327	0.108985	0.164624	0.0914826	0.154202	0.0730533	0.242467	0.213625	0.189251
30.998	0.17941	0.189452	0.117031	0.0763525	0.0992327	0.108985	0.165033	0.0919333	0.154202	0.0735884	0.242817	0.213968	0.189251
31.02	0.179788	0.189858	0.117904	0.0763525	0.0992327	0.109401	0.165441	0.0928346	0.154202	0.0741236	0.242817	0.21431	0.189629
31.042	0.180545	0.190264	0.118777	0.0763525	0.0992327	0.109401	0.16585	0.0937359	0.154202	0.0746588	0.243167	0.214653	0.190008
31.064	0.180924	0.190669	0.119651	0.0763525	0.0992327	0.109401	0.166258	0.0946372	0.154202	0.075194	0.243518	0.214995	0.190386
31.085	0.181681	0.191075	0.120524	0.0763525	0.0992327	0.109401	0.166667	0.0950879	0.154588	0.0757292	0.243868	0.215337	0.190765
31.107	0.182059	0.191481	0.121397	0.0763525	0.0987212	0.109817	0.167075	0.0959892	0.154588	0.0762644	0.244219	0.21568	0.190765
31.129	0.182438	0.191886	0.122271	0.0763525	0.0987212	0.109817	0.167484	0.0968905	0.154588	0.0767996	0.244569	0.216022	0.191143
31.151	0.182816	0.192292	0.123144	0.0763525	0.0987212	0.109817	0.167484	0.0977918	0.154588	0.0773348	0.244569	0.216364	0.191522
31.172	0.183573	0.192698	0.124017	0.0759162	0.0987212	0.109817	0.167892	0.0982425	0.154588	0.0778699	0.244919	0.216707	0.191522
31.194	0.183952	0.193103	0.124454	0.0759162	0.0982097	0.110233	0.168301	0.0991438	0.154588	0.0784051	0.24527	0.217049	0.1919
31.216	0.18433	0.193509	0.125328	0.0759162	0.0982097	0.110233	0.168301	0.100045	0.154588	0.0792079	0.24527	0.217049	0.1919
31.238	0.184709	0.193915	0.126201	0.0759162	0.0982097	0.110233	0.168709	0.100496	0.154588	0.0797431	0.24562	0.217391	0.192279
31.26	0.185466	0.193915	0.127074	0.0759162	0.0982097	0.110649	0.168709	0.101397	0.154588	0.0802783	0.245971	0.217734	0.192279
31.281	0.185844	0.19432	0.127511	0.0759162	0.0976982	0.110649	0.168709	0.102298	0.154588	0.0810811	0.245971	0.218076	0.192657
31.303	0.186223	0.194726	0.128384	0.0759162	0.0976982	0.110649	0.169118	0.102749	0.154588	0.0816163	0.246321	0.218418	0.193036
31.325	0.186601	0.195132	0.129258	0.0759162	0.0976982	0.111065	0.169118	0.10365	0.154202	0.0824191	0.246321	0.218761	0.193036
31.347	0.18698	0.195538	0.129694	0.0754799	0.0976982	0.111065	0.169118	0.104552	0.154202	0.0829542	0.246671	0.219103	0.193036
31.368	0.187358	0.195943	0.130568	0.0754799	0.0971867	0.111065	0.169118	0.105002	0.154202	0.083757	0.246671	0.219445	0.193414
31.39	0.187737	0.196349	0.131004	0.0754799	0.0971867	0.111481	0.169118	0.105904	0.154202	0.0842922	0.247022	0.219445	0.193414
31.412	0.188115	0.196755	0.131878	0.0754799	0.0971867	0.111481	0.169118	0.106805	0.154202	0.085095	0.247022	0.219788	0.193793
31.434	0.188494	0.19716	0.132751	0.0754799	0.0966752	0.111481	0.169118	0.107256	0.153816	0.0856302	0.247372	0.22013	0.193793
31.456	0.188872	0.197566	0.133188	0.0750436	0.0966752	0.111897	0.169118	0.108157	0.153816	0.086433	0.247372	0.220472	0.194171
31.477	0.189251	0.197566	0.133624	0.0750436	0.0966752	0.111897	0.169118	0.109058	0.153816	0.0872358	0.247372	0.220472	0.194171
31.499	0.189251	0.197972	0.134498	0.0750436	0.0966752	0.111897	0.169118	0.109509	0.153431	0.0877709	0.247722	0.220815	0.194171
31.521	0.189629	0.198377	0.134934	0.0750436	0.0961637	0.112313	0.169118	0.11041	0.153431	0.0885737	0.247722	0.221157	0.19455
31.543	0.190008	0.198783	0.135808	0.0746073	0.0961637	0.112313	0.168709	0.110861	0.153431	0.0891089	0.247722	0.221499	0.19455
31.564	0.190386	0.199189	0.136245	0.0746073	0.0961637	0.112729	0.168709	0.111762	0.153045	0.0899117	0.247722	0.221499	0.19455
31.586	0.190765	0.199594	0.136681	0.0746073	0.0956522	0.112729	0.168709	0.112213	0.153045	0.0904469	0.247722	0.221842	0.194928
31.608	0.190765	0.199594	0.137118	0.074171	0.0956522	0.112729	0.168301	0.113114	0.153045	0.0912497	0.248073	0.222184	0.194928
31.63	0.191143	0.2	0.137991	0.074171	0.0956522	0.113145	0.168301	0.113565	0.15266	0.0917849	0.248073	0.222184	0.194928
31.652	0.191522	0.200406	0.138428	0.074171	0.0956522	0.113145	0.167892	0.114466	0.15266	0.0925876	0.248073	0.222527	0.195307
31.673	0.191522	0.200811	0.138865	0.0737347	0.0956522	0.113561	0.167892	0.115367	0.152274	0.0931228	0.248073	0.222527	0.195307
31.695	0.1919	0.200811	0.139301	0.0737347	0.0951407	0.113561	0.167484	0.115818	0.152274	0.093658	0.248073	0.222869	0.195307
31.717	0.1919	0.201217	0.139738	0.0732984	0.0951407	0.113977	0.167484	0.116719	0.152274	0.0944608	0.248073	0.222869	0.195307
31.739	0.192279	0.201623	0.140175	0.0732984	0.0951407	0.113977	0.167075	0.11717	0.151889	0.094996	0.248073	0.223211	0.195685
31.76	0.192279	0.201623	0.140611	0.0732984	0.0951407	0.114393	0.166667	0.117621	0.151889	0.0957988	0.248073	0.223211	0.195685
31.782	0.192657	0.202028	0.141485	0.0728621	0.0951407	0.114393	0.166667	0.118522	0.151503	0.096334	0.248073	0.223554	0.195685
31.804	0.193036	0.202434	0.141921	0.0728621	0.0946292	0.114393	0.166258	0.118973	0.151503	0.0968691	0.247722	0.223554	0.195685
31.826	0.193036	0.202434	0.141921	0.0724258	0.0946292	0.114809	0.16585	0.119874	0.151118	0.0974043	0.247722	0.223896	0.196064
31.848	0.193036	0.20284	0.142358	0.0724258	0.0946292	0.114809	0.165441	0.120324	0.151118	0.0982071	0.247722	0.223896	0.196064
31.869	0.193414	0.20284	0.142795	0.0719895	0.0946292	0.115225	0.165441	0.121226	0.150732	0.0987423	0.247722	0.223896	0.196064
31.891	0.193414	0.203245	0.143231	0.0715532	0.0946292	0.115225	0.165033	0.121676	0.150732	0.0992775	0.247722	0.224238	0.196064
31.913	0.193793	0.203651	0.143668	0.0715532	0.0946292	0.115641	0.164624	0.122127	0.150732	0.0998127	0.247372	0.224238	0.196442
31.935	0.193793	0.203651	0.144105	0.0711169	0.0946292	0.115641	0.164216	0.123028	0.150347	0.100348	0.247372	0.224581	0.196442
31.956	0.194171	0.203651	0.144541	0.0711169	0.0946292	0.116057	0.164216	0.123479	0.150347	0.100883	0.247372	0.224581	0.196442
31.978	0.194171	0.204057	0.144541	0.0706806	0.0946292	0.116057	0.163807	0.12393	0.149961	0.101686	0.247372	0.224581	0.196442
32	0.194171	0.204057	0.144978	0.0702443	0.0946292	0.116473	0.163399	0.124831	0.149961	0.102221	0.247022	0.224581	0.196442
32.022	0.19455	0.204462	0.145415	0.0702443	0.0946292	0.116473	0.16299	0.125282	0.149961	0.102756	0.247022	0.224923	0.196442
32.044	0.19455	0.204462	0.145415	0.069808	0.0946292	0.116889	0.162582	0.125732	0.149576	0.103291	0.247022	0.224923	0.196442
32.065	0.19455	0.204462	0.145852	0.069808	0.0946292	0.116889	0.162582	0.126634	0.149576	0.103559	0.246671	0.224923	0.196821
32.087	0.194928	0.204868	0.145852	0.0693717	0.0946292	0.117304	0.162173	0.127084	0.14919	0.104094	0.246671	0.224923	0.196821
32.109	0.194928	0.204868	0.146288	0.0689354	0.0946292	0.117304	0.161765	0.127535	0.14919	0.104629	0.246671	0.224923	0.196821
32.131	0.194928	0.204868	0.146288	0.0684991	0.0946292	0.11772	0.161356	0.127986	0.14919	0.105165	0.246321	0.225265	0.196821
32.152	0.195307	0.204868	0.146725	0.0684991	0.0946292	0.11772	0.161356	0.128436	0.14919	0.1057	0.246321	0.225265	0.196821
32.174	0.195307	0.205274	0.146725	0.0680628	0.0946292	0.118136	0.160948	0.129338	0.148805	0.106235	0.245971	0.225265	0.196821
32.196	0.195307	0.205274	0.146725	0.0676265	0.0946292	0.118136	0.160539	0.129788	0.148805	0.10677	0.245971	0.225265	0.196821
32.218	0.195307	0.205274	0.147162	0.0676265	0.0951407	0.118552	0.160131	0.130239	0.148805	0.107038	0.245971	0.225265	0.196821
32.24	0.195685	0.205274	0.147162	0.0671902	0.0951407	0.118552	0.159722	0.130689	0.148805	0.107573	0.24562	0.225265	0.196821
32.261	0.195685	0.205274	0.147162	0.0667539	0.0951407	0.118968	0.159722	0.13114	0.148419	0.108108	0.24562	0.225265	0.196821
32.283	0.195685	0.205274	0.147162	0.0663176	0.0951407	0.118968	0.159314	0.131591	0.148419	0.108376	0.24527	0.225265	0.196821
32.305	0.195685	0.205274	0.147162	0.0663176	0.0956522	0.118968	0.158905	0.132041	0.148419	0.108911	0.24527	0.225265	0.196821
32.327	0.196064	0.205274	0.147162	0.0658813	0.0956522	0.119384	0.158905	0.132492	0.148419	0.109446	0.24527	0.225265	0.196821
32.348	0.196064	0.205274	0.147162	0.065445	0.0956522	0.119384	0.158497	0.132943	0.148419	0.109714	0.244919	0.225265	0.196821
32.37	0.196064	0.205274	0.147162	0.0650087	0.0956522	0.1198	0.158088	0.133393	0.148419	0.110249	0.244919	0.225265	0.196821
32.392	0.196064	0.205274	0.147162	0.0650087	0.0961637	0.1198	0.15768	0.133844	0.148419	0.110516	0.244919	0.225265	0.196821
32.414	0.196442	0.205274	0.147162	0.0645724	0.0961637	0.1198	0.15768	0.134295	0.148419	0.111052	0.244569	0.225265	0.196821
32.436	0.196442	0.205274	0.147162	0.0641361	0.0961637	0.120216	0.157271	0.134745	0.148419	0.111319	0.244569	0.225265	0.196821
32.457	0.196442	0.205274	0.147162	0.0636998	0.0966752	0.120216	0.157271	0.134745	0.148419	0.111854	0.244219	0.225265	0.196821
32.479	0.196442	0.205274	0.146725	0.0632635	0.0966752	0.120216	0.156863	0.135196	0.148419	0.112122	0.244219	0.225265	0.196821
32.501	0.196442	0.205274	0.146725	0.0632635	0.0971867	0.120632	0.156454	0.135647	0.148419	0.112657	0.244219	0.225265	0.196821
32.523	0.196442	0.205274	0.146725	0.0628272	0.0971867	0.120632	0.156454	0.136097	0.148805	0.112925	0.243868	0.225265	0.196821
32.544	0.196442	0.204868	0.146288	0.0623909	0.0971867	0.120632	0.156046	0.136097	0.148805	0.11346	0.243868	0.225265	0.196821
32.566	0.196821	0.204868	0.146288	0.0619546	0.0976982	0.121048	0.156046	0.136548	0.148805	0.113728	0.243518	0.225265	0.196821
32.588	0.196821	0.204868	0.145852	0.0619546	0.0976982	0.121048	0.155637	0.136999	0.148805	0.114263	0.243518	0.225265	0.196442
32.61	0.196821	0.204868	0.145415	0.0615183	0.0982097	0.121048	0.155637	0.136999	0.14919	0.11453	0.243518	0.225265	0.196442
32.632	0.196821	0.204868	0.145415	0.061082	0.0982097	0.121464	0.155229	0.137449	0.14919	0.114798	0.243167	0.225265	0.196442
32.653	0.196821	0.204868	0.144978	0.0606457	0.0987212	0.121464	0.155229	0.137449	0.14919	0.115333	0.243167	0.224923	0.196442
32.675	0.196821	0.204462	0.144541	0.0606457	0.0987212	0.121464	0.15482	0.1379	0.149576	0.115601	0.242817	0.224923	0.196442
32.697	0.196821	0.204462	0.144105	0.0602094	0.0987212	0.121464	0.15482	0.1379	0.149576	0.115868	0.242817	0.224923	0.196442
32.719	0.196821	0.204462	0.143668	0.0597731	0.0992327	0.12188	0.154412	0.138351	0.149961	0.116404	0.242817	0.224923	0.196064
32.74	0.196821	0.204462	0.143231	0.0593368	0.0992327	0.12188	0.154412	0.138351	0.149961	0.116671	0.242467	0.224923	0.196064
32.762	0.196821	0.204057	0.142795	0.0593368	0.0997442	0.12188	0.154412	0.138351	0.150347	0.116939	0.242467	0.224923	0.196064
32.784	0.196821	0.204057	0.142358	0.0589005	0.0997442	0.12188	0.154003	0.138801	0.150347	0.117474	0.242116	0.224923	0.196064
32.806	0.196821	0.204057	0.141921	0.0584642	0.100256	0.12188	0.154003	0.138801	0.150732	0.117742	0.242116	0.224923	0.195685
32.828	0.196821	0.204057	0.141485	0.0580279	0.100256	0.122296	0.154003	0.138801	0.150732	0.118009	0.242116	0.224923	0.195685
32.849	0.196821	0.203651	0.141048	0.0580279	0.100767	0.122296	0.153595	0.138801	0.151118	0.118544	0.241766	0.224923	0.195685
32.871	0.196821	0.203651	0.140611	0.0575916	0.100767	0.122296	0.153595	0.138801	0.151503	0.118812	0.241766	0.224923	0.195307
32.893	0.196821	0.203651	0.139738	0.0571553	0.101279	0.122296	0.153595	0.138801	0.151503	0.119079	0.241416	0.224581	0.195307
32.915	0.196821	0.203245	0.139301	0.0571553	0.101279	0.122296	0.153595	0.138801	0.151889	0.119615	0.241416	0.224581	0.195307
32.936	0.196821	0.203245	0.138865	0.056719	0.10179	0.122296	0.153595	0.138801	0.152274	0.119882	0.241065	0.224581	0.194928
32.958	0.196821	0.20284	0.137991	0.0562827	0.102302	0.122296	0.153186	0.138801	0.15266	0.12015	0.241065	0.224581	0.194928
32.98	0.196821	0.20284	0.137555	0.0562827	0.102302	0.122296	0.153186	0.138351	0.15266	0.120685	0.240715	0.224581	0.194928
33.002	0.196821	0.20284	0.136681	0.0558464	0.102813	0.122712	0.153186	0.138351	0.153045	0.120953	0.240364	0.224581	0.19455
33.024	0.196821	0.202434	0.135808	0.0554101	0.102813	0.122712	0.153186	0.138351	0.153431	0.12122	0.240364	0.224581	0.19455
33.045	0.196821	0.202434	0.135371	0.0554101	0.103325	0.122712	0.153186	0.1379	0.153816	0.121755	0.240014	0.224581	0.194171
33.067	0.196821	0.202028	0.134498	0.0549738	0.103325	0.122712	0.153186	0.1379	0.153816	0.122023	0.240014	0.224581	0.194171
33.089	0.196442	0.202028	0.134061	0.0545375	0.103836	0.122712	0.153186	0.137449	0.154202	0.122291	0.239664	0.224581	0.193793
33.111	0.196442	0.201623	0.133188	0.0545375	0.103836	0.122712	0.152778	0.137449	0.154588	0.122826	0.239313	0.224581	0.193793
33.132	0.196442	0.201623	0.132314	0.0541012	0.104348	0.122712	0.152778	0.136999	0.154973	0.123093	0.238963	0.224581	0.193414
33.154	0.196442	0.201217	0.131441	0.0541012	0.104348	0.122712	0.152778	0.136548	0.155359	0.123629	0.238963	0.224923	0.193036
33.176	0.196442	0.200811	0.130568	0.0536649	0.104859	0.122712	0.152778	0.136097	0.155744	0.123896	0.238612	0.224923	0.193036
33.198	0.196442	0.200811	0.130131	0.0536649	0.104859	0.122712	0.152778	0.135647	0.15613	0.124164	0.238262	0.224923	0.192657
33.22	0.196064	0.200406	0.129258	0.0532286	0.105371	0.122712	0.152778	0.135196	0.15613	0.124699	0.237912	0.224923	0.192657
33.241	0.196064	0.200406	0.128384	0.0532286	0.105371	0.122712	0.152778	0.134745	0.156515	0.124967	0.237561	0.224923	0.192279
33.263	0.196064	0.2	0.127511	0.0527923	0.105882	0.122712	0.152778	0.134295	0.156901	0.125234	0.237211	0.224923	0.1919
33.285	0.196064	0.199594	0.126638	0.0527923	0.105882	0.122712	0.152778	0.133844	0.157286	0.125769	0.236861	0.224923	0.1919
33.307	0.195685	0.199189	0.125764	0.052356	0.106394	0.122712	0.152778	0.133393	0.157672	0.126037	0.23651	0.225265	0.191522
33.328	0.195685	0.199189	0.124891	0.052356	0.106394	0.122712	0.152778	0.132943	0.158057	0.126572	0.23616	0.225265	0.191143
33.35	0.195685	0.198783	0.124017	0.0519197	0.106905	0.122712	0.152369	0.132041	0.158057	0.12684	0.235809	0.225265	0.190765
33.372	0.195307	0.198377	0.123144	0.0519197	0.106905	0.122712	0.152369	0.131591	0.158443	0.127107	0.235459	0.225265	0.190765
33.394	0.195307	0.197972	0.122271	0.0514834	0.106905	0.122712	0.152369	0.130689	0.158828	0.127375	0.234758	0.225608	0.190386
33.416	0.195307	0.197972	0.121397	0.0514834	0.107417	0.122712	0.152369	0.130239	0.159214	0.12791	0.234408	0.225608	0.190008
33.437	0.194928	0.197566	0.120524	0.0510471	0.107417	0.122712	0.152369	0.129338	0.159599	0.128178	0.234057	0.225608	0.189629
33.459	0.194928	0.19716	0.119651	0.0510471	0.107928	0.122712	0.152369	0.128887	0.159599	0.128445	0.233357	0.225608	0.189251
33.481	0.194928	0.196755	0.118777	0.0510471	0.107928	0.122712	0.152369	0.127986	0.159985	0.12898	0.233006	0.22595	0.188872
33.503	0.19455	0.196349	0.117904	0.0506108	0.10844	0.122712	0.151961	0.127084	0.16037	0.129248	0.232306	0.22595	0.188494
33.525	0.19455	0.195943	0.117031	0.0506108	0.10844	0.122712	0.151961	0.126634	0.16037	0.129516	0.231955	0.22595	0.188494
33.546	0.194171	0.195538	0.116157	0.0506108	0.10844	0.122712	0.151961	0.125732	0.160756	0.129783	0.231254	0.226292	0.188115
33.568	0.194171	0.195132	0.115284	0.0501745	0.108951	0.122712	0.151552	0.124831	0.161141	0.130051	0.230904	0.226292	0.187737
33.59	0.193793	0.194726	0.113974	0.0501745	0.108951	0.122712	0.151552	0.12393	0.161141	0.130318	0.230203	0.226292	0.187358
33.612	0.193793	0.19432	0.1131	0.0501745	0.108951	0.122712	0.151552	0.123028	0.161527	0.130586	0.229502	0.226635	0.18698
33.633	0.193414	0.19432	0.112227	0.0497382	0.109463	0.122712	0.151552	0.122127	0.161912	0.130854	0.229152	0.226635	0.186601
33.655	0.193036	0.193915	0.111354	0.0497382	0.109463	0.122712	0.151144	0.121226	0.161912	0.131121	0.228451	0.226635	0.186223
33.677	0.193036	0.193103	0.11048	0.0497382	0.109463	0.122712	0.151144	0.120324	0.162298	0.131389	0.227751	0.226977	0.185844
33.699	0.192657	0.192698	0.109607	0.0497382	0.109974	0.122712	0.150735	0.119423	0.162298	0.131656	0.22705	0.226977	0.185466
33.721	0.192657	0.192292	0.108734	0.0493019	0.109974	0.122712	0.150735	0.118071	0.162683	0.131924	0.226349	0.226977	0.185087
33.742	0.192279	0.191886	0.10786	0.0493019	0.109974	0.122712	0.150327	0.11717	0.162683	0.132192	0.225648	0.227319	0.184709
33.764	0.1919	0.191481	0.106987	0.0493019	0.109974	0.122296	0.150327	0.116269	0.162683	0.132459	0.224947	0.227319	0.18433
33.786	0.1919	0.191075	0.106114	0.0493019	0.110486	0.122296	0.149918	0.115367	0.163069	0.132459	0.224247	0.227319	0.183952
33.808	0.191522	0.190669	0.105677	0.0493019	0.110486	0.122296	0.149918	0.114015	0.163069	0.132727	0.223546	0.227319	0.183573
33.829	0.191143	0.190264	0.104803	0.0488656	0.110486	0.122296	0.14951	0.113114	0.163454	0.132994	0.222845	0.227662	0.183195
33.851	0.190765	0.189858	0.10393	0.0488656	0.110486	0.122296	0.14951	0.112213	0.163454	0.132994	0.222144	0.227662	0.182816
33.873	0.190765	0.189452	0.103057	0.0488656	0.110997	0.122296	0.149101	0.110861	0.163454	0.133262	0.221444	0.227662	0.182438
33.895	0.190386	0.189047	0.102183	0.0488656	0.110997	0.12188	0.148693	0.109959	0.16384	0.133262	0.220743	0.227662	0.182059
33.917	0.190008	0.188235	0.10131	0.0488656	0.110997	0.12188	0.148693	0.109058	0.16384	0.13353	0.220042	0.227662	0.181681
33.938	0.189629	0.18783	0.100437	0.0484293	0.110997	0.12188	0.148284	0.107706	0.16384	0.13353	0.218991	0.228004	0.181302
33.96	0.189251	0.187424	0.0995633	0.0484293	0.110997	0.12188	0.147876	0.106805	0.16384	0.13353	0.21829	0.228004	0.180924
33.982	0.188872	0.187018	0.0991266	0.0484293	0.111509	0.12188	0.147467	0.105453	0.164225	0.133797	0.217589	0.228004	0.180924
34.004	0.188494	0.186613	0.0982533	0.0484293	0.111509	0.121464	0.147467	0.104552	0.164225	0.133797	0.216889	0.228004	0.180545
34.025	0.188494	0.186207	0.0973799	0.0484293	0.111509	0.121464	0.147059	0.1032	0.164225	0.133797	0.216188	0.228004	0.180167
34.047	0.188115	0.185396	0.0965066	0.047993	0.111509	0.121464	0.14665	0.102298	0.164225	0.133797	0.215137	0.228004	0.179788
34.069	0.187737	0.18499	0.0960699	0.047993	0.111509	0.121048	0.146242	0.100946	0.164225	0.133797	0.214436	0.228004	0.17941
34.091	0.187358	0.184584	0.0951965	0.047993	0.111509	0.121048	0.145833	0.100045	0.164225	0.133797	0.213735	0.228004	0.179031
34.113	0.18698	0.184178	0.0943231	0.047993	0.111509	0.121048	0.145425	0.0986931	0.164225	0.133797	0.213034	0.228004	0.178653
34.134	0.186601	0.183773	0.0934498	0.0475567	0.11202	0.120632	0.145425	0.0977918	0.164611	0.133797	0.212334	0.228004	0.178653
34.156	0.186223	0.182961	0.0930131	0.0475567	0.11202	0.120632	0.145016	0.0968905	0.164611	0.133797	0.211282	0.228004	0.178274
34.178	0.185844	0.182556	0.0921397	0.0475567	0.11202	0.120632	0.144608	0.0955385	0.164611	0.133797	0.210582	0.228004	0.177896
34.2	0.185466	0.18215	0.0917031	0.0471204	0.11202	0.120216	0.144199	0.0946372	0.164611	0.133797	0.209881	0.228004	0.177517
34.221	0.185087	0.181744	0.0908297	0.0471204	0.11202	0.120216	0.143791	0.0932853	0.164611	0.133797	0.20918	0.227662	0.177517
34.243	0.184709	0.180933	0.0899563	0.0471204	0.11202	0.120216	0.143382	0.092384	0.164611	0.13353	0.208479	0.227662	0.177139
34.265	0.18433	0.180527	0.0895197	0.0466841	0.11202	0.1198	0.142974	0.091032	0.164611	0.13353	0.207779	0.227662	0.17676
34.287	0.183952	0.180122	0.0886463	0.0466841	0.11202	0.1198	0.142565	0.0901307	0.164611	0.13353	0.207078	0.227662	0.17676
34.309	0.183573	0.179716	0.0882096	0.0466841	0.11202	0.119384	0.142565	0.0892294	0.164611	0.133262	0.206377	0.227319	0.176382
34.33	0.183195	0.178905	0.0873362	0.0462478	0.11202	0.119384	0.142157	0.0878774	0.164611	0.133262	0.205676	0.227319	0.176382
34.352	0.182816	0.178499	0.0868996	0.0462478	0.11202	0.118968	0.141748	0.0869761	0.164611	0.132994	0.204975	0.227319	0.176003
34.374	0.182438	0.178093	0.0860262	0.0458115	0.11202	0.118968	0.14134	0.0856242	0.164611	0.132727	0.204275	0.226977	0.176003
34.396	0.182059	0.177688	0.0855895	0.0458115	0.11202	0.118552	0.140931	0.0847228	0.164996	0.132727	0.203924	0.226977	0.175625
34.417	0.181681	0.176876	0.0851528	0.0453752	0.11202	0.118552	0.140523	0.0838215	0.164996	0.132459	0.203224	0.226977	0.175625
34.439	0.181302	0.176471	0.0842795	0.0453752	0.11202	0.118136	0.140523	0.0829202	0.164996	0.132192	0.202523	0.226635	0.175246
34.461	0.180924	0.176065	0.0838428	0.0449389	0.11202	0.118136	0.140114	0.0815683	0.164996	0.132192	0.202172	0.226635	0.175246
34.483	0.180924	0.175659	0.0834061	0.0449389	0.11202	0.11772	0.139706	0.080667	0.164996	0.131924	0.201472	0.226292	0.174868
34.505	0.180545	0.174848	0.0825328	0.0445026	0.11202	0.11772	0.139297	0.0797657	0.164996	0.131656	0.201121	0.22595	0.174868
34.526	0.180167	0.174442	0.0820961	0.0445026	0.11202	0.117304	0.139297	0.0788644	0.164996	0.131389	0.20042	0.22595	0.174868
34.548	0.179788	0.174037	0.0816594	0.0440663	0.11202	0.117304	0.138889	0.0775124	0.164996	0.131121	0.20007	0.225608	0.174489
34.57	0.17941	0.173631	0.0812227	0.04363	0.11202	0.116889	0.13848	0.0766111	0.164996	0.130854	0.199369	0.225608	0.174489
34.592	0.179031	0.172819	0.0803493	0.04363	0.111509	0.116889	0.13848	0.0757098	0.164996	0.130854	0.199019	0.225265	0.174489
34.613	0.178653	0.172414	0.0799127	0.0431937	0.111509	0.116473	0.138072	0.0748085	0.164996	0.130586	0.198669	0.224923	0.174489
34.635	0.178653	0.172008	0.079476	0.0427574	0.111509	0.116057	0.138072	0.0739072	0.164996	0.130318	0.198318	0.224581	0.174111
34.657	0.178274	0.171602	0.0790393	0.0427574	0.111509	0.116057	0.137663	0.0730059	0.164996	0.129783	0.197968	0.224581	0.174111
34.679	0.177896	0.171197	0.0786026	0.0423211	0.111509	0.115641	0.137663	0.0721046	0.165382	0.129516	0.197617	0.224238	0.174111
34.701	0.177517	0.170385	0.0777293	0.0418848	0.111509	0.115641	0.137255	0.0712032	0.165382	0.129248	0.197267	0.223896	0.174111
34.722	0.177517	0.16998	0.0772926	0.0418848	0.110997	0.115225	0.137255	0.0703019	0.165382	0.12898	0.197267	0.223554	0.174111
34.744	0.177139	0.169574	0.0768559	0.0414485	0.110997	0.115225	0.137255	0.0694006	0.165382	0.128713	0.196917	0.223211	0.174111
34.766	0.17676	0.169168	0.0764192	0.0410122	0.110997	0.114809	0.136846	0.06895	0.165382	0.128445	0.196566	0.222869	0.174111
34.788	0.17676	0.168763	0.0759825	0.0405759	0.110997	0.114809	0.136846	0.0680487	0.165382	0.128178	0.196566	0.222869	0.174111
34.809	0.176382	0.168357	0.0755459	0.0405759	0.110486	0.114393	0.136846	0.0671474	0.165382	0.12791	0.196216	0.222527	0.174111
34.831	0.176382	0.167546	0.0751092	0.0401396	0.110486	0.114393	0.136846	0.0662461	0.165767	0.127375	0.196216	0.222184	0.174111
34.853	0.176003	0.16714	0.0746725	0.0397033	0.110486	0.113977	0.136438	0.0657954	0.165767	0.127107	0.196216	0.221842	0.174111
34.875	0.176003	0.166734	0.0742358	0.0397033	0.109974	0.113977	0.136438	0.0648941	0.165767	0.12684	0.196216	0.221499	0.174111
34.897	0.175625	0.166329	0.0737991	0.039267	0.109974	0.113561	0.136438	0.0644434	0.165767	0.126572	0.195865	0.221157	0.174111
34.918	0.175625	0.165923	0.0733624	0.0388307	0.109974	0.113561	0.136438	0.0635421	0.166153	0.126305	0.195865	0.220815	0.174111
34.94	0.175246	0.165517	0.0729258	0.0388307	0.109463	0.113145	0.136438	0.0630915	0.166153	0.125769	0.196216	0.220472	0.174111
34.962	0.175246	0.165112	0.0724891	0.0383944	0.109463	0.113145	0.136438	0.0621902	0.166153	0.125502	0.196216	0.22013	0.174111
34.984	0.174868	0.164706	0.0724891	0.0379581	0.108951	0.112729	0.136438	0.0617395	0.166538	0.125234	0.196216	0.219788	0.174111
35.005	0.174868	0.1643	0.0720524	0.0379581	0.108951	0.112729	0.136846	0.0608382	0.166538	0.124967	0.196216	0.219445	0.174489
35.027	0.174868	0.163895	0.0716157	0.0375218	0.10844	0.112729	0.136846	0.0603876	0.166538	0.124431	0.196566	0.219103	0.174489
35.049	0.174489	0.163489	0.071179	0.0370855	0.10844	0.112313	0.136846	0.0599369	0.166924	0.124164	0.196566	0.218761	0.174489
35.071	0.174489	0.163083	0.0707424	0.0370855	0.107928	0.112313	0.136846	0.0594863	0.166924	0.123896	0.196917	0.218418	0.174489
35.093	0.174489	0.162677	0.0703057	0.0366492	0.107928	0.112313	0.137255	0.0585849	0.167309	0.123629	0.197267	0.218076	0.174489
35.114	0.174489	0.162677	0.069869	0.0366492	0.107417	0.111897	0.137255	0.0581343	0.167309	0.123361	0.197267	0.217734	0.174868
35.136	0.174111	0.162272	0.069869	0.0362129	0.107417	0.111897	0.137255	0.0576836	0.167695	0.122826	0.197617	0.217391	0.174868
35.158	0.174111	0.161866	0.0694323	0.0362129	0.106905	0.111897	0.137663	0.057233	0.167695	0.122558	0.197968	0.217049	0.174868
35.18	0.174111	0.16146	0.0689956	0.0357766	0.106394	0.111897	0.137663	0.0567823	0.16808	0.122291	0.198318	0.216707	0.174868
35.201	0.174111	0.16146	0.068559	0.0357766	0.106394	0.111481	0.137663	0.0563317	0.16808	0.122023	0.198669	0.216364	0.175246
35.223	0.174111	0.161055	0.0681223	0.0353403	0.105882	0.111481	0.138072	0.055881	0.168466	0.121755	0.199369	0.216022	0.175246
35.245	0.174111	0.160649	0.0681223	0.0353403	0.105371	0.111481	0.138072	0.0554304	0.168466	0.12122	0.19972	0.21568	0.175246
35.267	0.174111	0.160649	0.0676856	0.034904	0.104859	0.111481	0.13848	0.0549797	0.168851	0.120953	0.20007	0.215337	0.175246
35.289	0.174111	0.160243	0.0672489	0.034904	0.104348	0.111481	0.138889	0.0549797	0.169237	0.120685	0.20042	0.214995	0.175625
35.31	0.174111	0.160243	0.0668122	0.0344677	0.104348	0.111065	0.138889	0.0545291	0.169237	0.120417	0.201121	0.214653	0.175625
35.332	0.174111	0.159838	0.0668122	0.0344677	0.103836	0.111065	0.139297	0.0540784	0.169622	0.12015	0.201472	0.21431	0.175625
35.354	0.174111	0.159838	0.0663755	0.0344677	0.103325	0.111065	0.139297	0.0536278	0.170008	0.119882	0.202172	0.213968	0.176003
35.376	0.174111	0.159838	0.0659389	0.0344677	0.102813	0.111065	0.139706	0.0536278	0.170008	0.119615	0.202873	0.213625	0.176003
35.397	0.174111	0.159432	0.0655022	0.0340314	0.102302	0.111065	0.140114	0.0531771	0.170393	0.119347	0.203224	0.213283	0.176003
35.419	0.174111	0.159432	0.0650655	0.0340314	0.10179	0.111065	0.140114	0.0531771	0.170779	0.119079	0.203924	0.213283	0.176382
35.441	0.174111	0.159432	0.0650655	0.0340314	0.101279	0.111065	0.140523	0.0527265	0.171164	0.118812	0.204625	0.212941	0.176382
35.463	0.174111	0.159026	0.0646288	0.0340314	0.100767	0.111065	0.140931	0.0522758	0.171164	0.118544	0.205326	0.212598	0.176382
35.485	0.174111	0.159026	0.0641921	0.0340314	0.0997442	0.111065	0.14134	0.0522758	0.17155	0.118009	0.206027	0.212256	0.17676
35.506	0.174489	0.159026	0.0637555	0.0340314	0.0992327	0.111065	0.14134	0.0522758	0.171935	0.117742	0.206377	0.212256	0.17676
35.528	0.174489	0.159026	0.0633188	0.0335951	0.0987212	0.111065	0.141748	0.0518251	0.172321	0.117474	0.207078	0.211914	0.17676
35.55	0.174489	0.159026	0.0633188	0.0335951	0.0982097	0.111065	0.142157	0.0518251	0.172706	0.117206	0.207779	0.211914	0.177139
35.572	0.174489	0.159026	0.0628821	0.0335951	0.0976982	0.111065	0.142565	0.0513745	0.173092	0.116939	0.208479	0.211571	0.177139
35.593	0.174489	0.159026	0.0624454	0.0340314	0.0966752	0.111065	0.142565	0.0513745	0.173477	0.116671	0.20918	0.211229	0.177139
35.615	0.174868	0.159026	0.0620087	0.0340314	0.0961637	0.111065	0.142974	0.0513745	0.173863	0.116404	0.209881	0.211229	0.177517
35.637	0.174868	0.159026	0.0615721	0.0340314	0.0956522	0.111065	0.143382	0.0509238	0.174248	0.116136	0.210932	0.211229	0.177517
35.659	0.174868	0.159026	0.0611354	0.0340314	0.0946292	0.111065	0.143791	0.0509238	0.174248	0.115868	0.211633	0.210887	0.177517
35.681	0.174868	0.159432	0.0611354	0.0340314	0.0941176	0.111065	0.144199	0.0509238	0.174634	0.115601	0.212334	0.210887	0.177896
35.702	0.175246	0.159432	0.0606987	0.0340314	0.0930946	0.111065	0.144199	0.0509238	0.175019	0.115333	0.213034	0.210887	0.177896
35.724	0.175246	0.159432	0.060262	0.0344677	0.0925831	0.111065	0.144608	0.0504732	0.175405	0.115066	0.213735	0.210544	0.177896
35.746	0.175246	0.159432	0.0598253	0.0344677	0.0920716	0.111065	0.145016	0.0504732	0.17579	0.115066	0.214436	0.210544	0.178274
35.768	0.175246	0.159838	0.0593886	0.0344677	0.0910486	0.111065	0.145425	0.0504732	0.176561	0.114798	0.215137	0.210544	0.178274
35.789	0.175625	0.159838	0.058952	0.034904	0.0905371	0.111065	0.145833	0.0504732	0.176947	0.11453	0.215837	0.210544	0.178274
35.811	0.175625	0.159838	0.0585153	0.034904	0.0895141	0.111065	0.145833	0.0504732	0.177332	0.114263	0.216538	0.210544	0.178653
35.833	0.175625	0.160243	0.0580786	0.0353403	0.088491	0.111065	0.146242	0.0504732	0.177718	0.113995	0.217239	0.210544	0.178653
35.855	0.176003	0.160243	0.0576419	0.0353403	0.0879795	0.111065	0.14665	0.0504732	0.178103	0.113728	0.21794	0.210544	0.178653
35.877	0.176003	0.160649	0.0572052	0.0357766	0.0869565	0.111065	0.147059	0.0504732	0.178489	0.11346	0.218641	0.210544	0.179031
35.898	0.176003	0.160649	0.0567686	0.0362129	0.086445	0.111065	0.147059	0.0504732	0.178874	0.113192	0.219341	0.210544	0.179031
35.92	0.176382	0.161055	0.0563319	0.0362129	0.085422	0.111065	0.147467	0.0504732	0.17926	0.112925	0.220042	0.210887	0.179031
35.942	0.176382	0.16146	0.0558952	0.0366492	0.084399	0.111065	0.147876	0.0504732	0.179645	0.112657	0.220743	0.210887	0.17941
35.964	0.176382	0.16146	0.0554585	0.0370855	0.0838875	0.111065	0.147876	0.0504732	0.180031	0.11239	0.221444	0.210887	0.17941
35.985	0.17676	0.161866	0.0550218	0.0375218	0.0828645	0.111065	0.148284	0.0504732	0.180802	0.112122	0.222144	0.211229	0.179788
36.007	0.17676	0.162272	0.0545852	0.0375218	0.0818414	0.111065	0.148693	0.0504732	0.181187	0.111854	0.222495	0.211229	0.179788
36.029	0.17676	0.162272	0.0541485	0.0379581	0.0808184	0.111065	0.149101	0.0504732	0.181573	0.111587	0.223196	0.211229	0.180167
36.051	0.177139	0.162677	0.0537118	0.0383944	0.0803069	0.111065	0.149101	0.0509238	0.181958	0.111319	0.223896	0.211571	0.180167
36.073	0.177139	0.163083	0.0532751	0.0388307	0.0792839	0.111481	0.14951	0.0509238	0.182344	0.111052	0.224597	0.211914	0.180167
36.094	0.177139	0.163489	0.0528384	0.039267	0.0782609	0.111481	0.14951	0.0509238	0.182729	0.110784	0.224947	0.211914	0.180545
36.116	0.177517	0.163895	0.0524017	0.0401396	0.0772379	0.111481	0.149918	0.0509238	0.183115	0.110516	0.225648	0.212256	0.180545
36.138	0.177517	0.1643	0.0519651	0.0405759	0.0767263	0.111481	0.149918	0.0513745	0.1835	0.110249	0.225999	0.212256	0.180924
36.16	0.177517	0.164706	0.0515284	0.0410122	0.0757033	0.111481	0.150327	0.0513745	0.184271	0.109981	0.226699	0.212598	0.180924
36.181	0.177896	0.165112	0.0515284	0.0414485	0.0746803	0.111481	0.150327	0.0518251	0.184657	0.109714	0.22705	0.212941	0.181302
36.203	0.177896	0.165517	0.0510917	0.0423211	0.0736573	0.111481	0.150735	0.0518251	0.185042	0.109446	0.227751	0.213283	0.181681
36.225	0.177896	0.165923	0.050655	0.0427574	0.0726343	0.111481	0.150735	0.0522758	0.185428	0.109178	0.228101	0.213625	0.181681
36.247	0.178274	0.166329	0.0502183	0.0431937	0.0716113	0.111481	0.151144	0.0522758	0.185813	0.108911	0.228802	0.213625	0.182059
36.269	0.178274	0.166734	0.0497817	0.0440663	0.0705882	0.111481	0.151144	0.0527265	0.186199	0.108643	0.229152	0.213968	0.182059
36.29	0.178274	0.16714	0.049345	0.0445026	0.0695652	0.111481	0.151552	0.0527265	0.186584	0.108376	0.229502	0.21431	0.182438
36.312	0.178653	0.167546	0.0489083	0.0453752	0.0690537	0.111481	0.151552	0.0531771	0.18697	0.108376	0.229853	0.214653	0.182816
36.334	0.178653	0.167951	0.0484716	0.0458115	0.0680307	0.111481	0.151552	0.0536278	0.187355	0.108108	0.230203	0.214995	0.182816
36.356	0.178653	0.168357	0.0480349	0.0466841	0.0670077	0.111897	0.151961	0.0536278	0.187741	0.107841	0.230904	0.215337	0.183195
36.377	0.179031	0.168763	0.0475983	0.0471204	0.0659847	0.111897	0.151961	0.0540784	0.188126	0.107573	0.231254	0.21568	0.183573
36.399	0.179031	0.169168	0.0475983	0.047993	0.0649616	0.111897	0.151961	0.0545291	0.188512	0.107305	0.231605	0.216022	0.183573
36.421	0.179031	0.169574	0.0471616	0.0484293	0.0639386	0.111897	0.151961	0.0549797	0.188897	0.107038	0.231955	0.216364	0.183952
36.443	0.17941	0.16998	0.0467249	0.0493019	0.0629156	0.111897	0.152369	0.0554304	0.189283	0.10677	0.231955	0.216707	0.18433
36.465	0.17941	0.170791	0.0462882	0.0501745	0.0618926	0.112313	0.152369	0.055881	0.189668	0.106503	0.232306	0.217049	0.184709
36.486	0.179788	0.171197	0.0462882	0.0506108	0.0608696	0.112313	0.152369	0.0563317	0.190054	0.106235	0.232656	0.217734	0.184709
36.508	0.179788	0.171602	0.0458515	0.0514834	0.0598465	0.112313	0.152369	0.0567823	0.190439	0.105967	0.233006	0.218076	0.185087
36.53	0.180167	0.172008	0.0454148	0.052356	0.0588235	0.112729	0.152369	0.057233	0.190825	0.1057	0.233357	0.218418	0.185466
36.552	0.180167	0.172414	0.0454148	0.0527923	0.058312	0.112729	0.152369	0.0576836	0.19121	0.1057	0.233357	0.218761	0.185844
36.574	0.180167	0.173225	0.0449782	0.0536649	0.057289	0.112729	0.152369	0.0585849	0.191596	0.105432	0.233707	0.219103	0.186223
36.595	0.180545	0.173631	0.0449782	0.0545375	0.056266	0.113145	0.152369	0.0590356	0.191981	0.105165	0.233707	0.219445	0.186601
36.617	0.180545	0.174037	0.0445415	0.0549738	0.055243	0.113145	0.152369	0.0594863	0.192367	0.104897	0.234057	0.22013	0.186601
36.639	0.180924	0.174442	0.0445415	0.0558464	0.0542199	0.113561	0.152369	0.0603876	0.192367	0.104629	0.234408	0.220472	0.18698
36.661	0.180924	0.174848	0.0441048	0.056719	0.0531969	0.113561	0.152369	0.0608382	0.192753	0.104629	0.234408	0.220815	0.187358
36.682	0.181302	0.175254	0.0441048	0.0575916	0.0526854	0.113977	0.152369	0.0617395	0.193138	0.104362	0.234408	0.221157	0.187737
36.704	0.181681	0.176065	0.0441048	0.0580279	0.0516624	0.113977	0.152369	0.0621902	0.193524	0.104094	0.234758	0.221499	0.188115
36.726	0.181681	0.176471	0.0436681	0.0589005	0.0506394	0.114393	0.152369	0.0630915	0.193909	0.104094	0.234758	0.222184	0.188494
36.748	0.182059	0.176876	0.0436681	0.0593368	0.0496164	0.114393	0.152369	0.0639928	0.193909	0.103827	0.235109	0.222527	0.188872
36.77	0.182059	0.177282	0.0436681	0.0602094	0.0491049	0.114809	0.152369	0.0648941	0.194295	0.103559	0.235109	0.222869	0.189251
36.791	0.182438	0.177688	0.0436681	0.061082	0.0480818	0.115225	0.151961	0.0653447	0.19468	0.103559	0.235109	0.223211	0.189629
36.813	0.182816	0.178093	0.0436681	0.0615183	0.0475703	0.115641	0.151961	0.0662461	0.19468	0.103291	0.235109	0.223896	0.190008
36.835	0.182816	0.178499	0.0432314	0.0623909	0.0465473	0.115641	0.151961	0.0671474	0.195066	0.103291	0.235459	0.224238	0.190386
36.857	0.183195	0.17931	0.0432314	0.0628272	0.0455243	0.116057	0.151961	0.0680487	0.195451	0.103024	0.235459	0.224581	0.190765
36.878	0.183573	0.179716	0.0432314	0.0636998	0.0450128	0.116473	0.151961	0.06895	0.195451	0.103024	0.235459	0.224923	0.191143
36.9	0.183573	0.180122	0.0432314	0.0641361	0.0439898	0.116889	0.151552	0.0698513	0.195837	0.102756	0.235459	0.225608	0.191522
36.922	0.183952	0.180527	0.0436681	0.0645724	0.0434783	0.117304	0.151552	0.0707526	0.195837	0.102756	0.235809	0.22595	0.1919
36.944	0.18433	0.180933	0.0436681	0.065445	0.0424552	0.117304	0.151552	0.0721046	0.196222	0.102489	0.235809	0.226292	0.192279
36.966	0.184709	0.181339	0.0436681	0.0658813	0.0419437	0.11772	0.151552	0.0730059	0.196222	0.102489	0.235809	0.226635	0.192657
36.987	0.184709	0.181744	0.0436681	0.0663176	0.0414322	0.118136	0.151144	0.0739072	0.196608	0.102221	0.235809	0.227319	0.193414
37.009	0.185087	0.18215	0.0436681	0.0671902	0.0404092	0.118552	0.151144	0.0748085	0.196608	0.102221	0.235809	0.227662	0.193793
37.031	0.185466	0.182556	0.0441048	0.0676265	0.0398977	0.118968	0.151144	0.0761604	0.196993	0.102221	0.235809	0.228004	0.194171
37.053	0.185844	0.182961	0.0441048	0.0680628	0.0393862	0.119384	0.150735	0.0770617	0.196993	0.101953	0.235809	0.228346	0.19455
37.074	0.186223	0.183367	0.0441048	0.0684991	0.0383632	0.1198	0.150735	0.077963	0.196993	0.101953	0.23616	0.228689	0.194928
37.096	0.186601	0.183773	0.0445415	0.0689354	0.0378517	0.120216	0.150735	0.079315	0.197379	0.101953	0.23616	0.229031	0.195307
37.118	0.186601	0.183773	0.0445415	0.0693717	0.0373402	0.120632	0.150327	0.0802163	0.197379	0.101686	0.23616	0.229716	0.195685
37.14	0.18698	0.184178	0.0449782	0.069808	0.0368286	0.121464	0.150327	0.0815683	0.197379	0.101686	0.23616	0.230058	0.196064
37.162	0.187358	0.184584	0.0449782	0.0702443	0.0363171	0.12188	0.150327	0.0824696	0.197379	0.101686	0.23616	0.230401	0.196442
37.183	0.187737	0.18499	0.0454148	0.0702443	0.0358056	0.122296	0.149918	0.0838215	0.197379	0.101686	0.23616	0.230743	0.196821
37.205	0.188115	0.185396	0.0454148	0.0706806	0.0352941	0.122712	0.149918	0.0851735	0.197764	0.101686	0.23616	0.231085	0.197199
37.227	0.188494	0.185801	0.0458515	0.0711169	0.0347826	0.123128	0.14951	0.0860748	0.197764	0.101418	0.23651	0.231428	0.197578
37.249	0.188872	0.185801	0.0458515	0.0715532	0.0342711	0.123544	0.14951	0.0874268	0.197764	0.101418	0.23651	0.23177	0.197956
37.27	0.189251	0.186207	0.0462882	0.0715532	0.0337596	0.12396	0.14951	0.0887787	0.197764	0.101418	0.23651	0.232112	0.198335
37.292	0.189629	0.186613	0.0462882	0.0719895	0.0332481	0.124792	0.149101	0.08968	0.197764	0.101418	0.23651	0.232455	0.198335
37.314	0.190008	0.186613	0.0467249	0.0719895	0.0327366	0.125208	0.149101	0.091032	0.197764	0.101418	0.23651	0.232797	0.198713
37.336	0.190386	0.187018	0.0471616	0.0724258	0.0327366	0.125624	0.149101	0.092384	0.197764	0.101418	0.236861	0.233139	0.199092
37.358	0.190765	0.187424	0.0471616	0.0724258	0.0322251	0.12604	0.148693	0.0937359	0.197764	0.101418	0.236861	0.233482	0.19947
37.379	0.191143	0.187424	0.0475983	0.0724258	0.0317136	0.126872	0.148693	0.0950879	0.197379	0.101418	0.236861	0.233482	0.199849
37.401	0.191522	0.18783	0.0480349	0.0728621	0.0317136	0.127288	0.148284	0.0959892	0.197379	0.101151	0.236861	0.233824	0.200227
37.423	0.1919	0.18783	0.0484716	0.0728621	0.031202	0.127704	0.148284	0.0973411	0.197379	0.101151	0.237211	0.234166	0.200227
37.445	0.192279	0.188235	0.0484716	0.0728621	0.0306905	0.12812	0.147876	0.0986931	0.197379	0.101151	0.237211	0.234509	0.200606
37.466	0.192657	0.188235	0.0489083	0.0728621	0.0306905	0.128952	0.147876	0.100045	0.197379	0.101151	0.237211	0.234851	0.200984
37.488	0.193414	0.188641	0.049345	0.0732984	0.030179	0.129368	0.147876	0.101397	0.196993	0.101151	0.237561	0.234851	0.200984
37.51	0.193793	0.188641	0.0497817	0.0732984	0.030179	0.129784	0.147467	0.102749	0.196993	0.101151	0.237561	0.235193	0.201363
37.532	0.194171	0.188641	0.0502183	0.0732984	0.030179	0.130616	0.147467	0.104101	0.196993	0.101151	0.237561	0.235193	0.201741
37.554	0.19455	0.189047	0.050655	0.0732984	0.0296675	0.131032	0.147059	0.105453	0.196608	0.101151	0.237912	0.235536	0.201741
37.575	0.194928	0.189047	0.050655	0.0732984	0.0296675	0.131448	0.147059	0.106805	0.196608	0.101151	0.237912	0.235878	0.20212
37.597	0.195307	0.189047	0.0510917	0.0732984	0.0296675	0.131864	0.14665	0.108157	0.196222	0.101151	0.238262	0.235878	0.20212
37.619	0.195685	0.189452	0.0515284	0.0732984	0.029156	0.132696	0.14665	0.109058	0.196222	0.101151	0.238262	0.235878	0.202498
37.641	0.196064	0.189452	0.0519651	0.0728621	0.029156	0.133111	0.14665	0.11041	0.196222	0.100883	0.238612	0.23622	0.202498
37.662	0.196442	0.189452	0.0524017	0.0728621	0.029156	0.133527	0.146242	0.111762	0.195837	0.100883	0.238612	0.23622	0.202498
37.684	0.196821	0.189452	0.0528384	0.0728621	0.029156	0.134359	0.146242	0.113114	0.195837	0.100883	0.238963	0.236563	0.202877
37.706	0.197199	0.189452	0.0532751	0.0728621	0.029156	0.134775	0.145833	0.114466	0.195451	0.100883	0.238963	0.236563	0.202877
37.728	0.197578	0.189858	0.0537118	0.0728621	0.029156	0.135191	0.145833	0.115818	0.195066	0.100883	0.239313	0.236563	0.202877
37.75	0.197956	0.189858	0.0541485	0.0724258	0.029156	0.135607	0.145425	0.11717	0.195066	0.100883	0.239313	0.236563	0.202877
37.771	0.198335	0.189858	0.0541485	0.0724258	0.029156	0.136439	0.145425	0.118522	0.19468	0.100883	0.239664	0.236905	0.203255
37.793	0.198335	0.189858	0.0545852	0.0724258	0.029156	0.136855	0.145016	0.119874	0.19468	0.100883	0.239664	0.236905	0.203255
37.815	0.198713	0.189858	0.0550218	0.0719895	0.029156	0.137271	0.145016	0.120775	0.194295	0.100615	0.240014	0.236905	0.203255
37.837	0.199092	0.189858	0.0554585	0.0719895	0.029156	0.137687	0.144608	0.122127	0.193909	0.100615	0.240364	0.236905	0.203255
37.858	0.19947	0.189858	0.0558952	0.0719895	0.029156	0.138103	0.144608	0.123479	0.193909	0.100615	0.240364	0.236905	0.203255
37.88	0.199849	0.189858	0.0563319	0.0715532	0.029156	0.138519	0.144608	0.124831	0.193524	0.100615	0.240715	0.236905	0.203255
37.902	0.200227	0.189858	0.0567686	0.0715532	0.029156	0.139351	0.144199	0.126183	0.193138	0.100615	0.241065	0.236905	0.203255
37.924	0.200227	0.189858	0.0572052	0.0715532	0.0296675	0.139767	0.144199	0.127084	0.192753	0.100615	0.241416	0.236905	0.203255
37.946	0.200606	0.189858	0.0576419	0.0711169	0.0296675	0.140183	0.143791	0.128436	0.192753	0.100348	0.241416	0.236905	0.203255
37.967	0.200984	0.189858	0.0580786	0.0711169	0.0296675	0.140599	0.143791	0.129788	0.192367	0.100348	0.241766	0.236905	0.203255
37.989	0.200984	0.189858	0.0585153	0.0706806	0.030179	0.141015	0.143382	0.13114	0.191981	0.100348	0.242116	0.236905	0.203255
38.011	0.201363	0.189858	0.058952	0.0706806	0.030179	0.141431	0.143382	0.132041	0.191596	0.100348	0.242467	0.236905	0.203255
38.033	0.201741	0.189858	0.0593886	0.0702443	0.0306905	0.141847	0.143382	0.133393	0.191596	0.100348	0.242467	0.236563	0.202877
38.054	0.201741	0.189452	0.0598253	0.0702443	0.0306905	0.142263	0.142974	0.134295	0.19121	0.100348	0.242817	0.236563	0.202877
38.076	0.20212	0.189452	0.060262	0.069808	0.031202	0.142679	0.142974	0.135647	0.190825	0.100348	0.243167	0.236563	0.202877
38.098	0.20212	0.189452	0.0606987	0.069808	0.031202	0.143095	0.142565	0.136999	0.190439	0.100348	0.243518	0.23622	0.202877
38.12	0.202498	0.189452	0.0611354	0.0693717	0.0317136	0.143511	0.142565	0.1379	0.190054	0.10008	0.243868	0.23622	0.202498
38.142	0.202498	0.189452	0.0615721	0.0693717	0.0317136	0.143927	0.142157	0.139252	0.189668	0.10008	0.243868	0.23622	0.202498
38.163	0.202498	0.189047	0.0620087	0.0689354	0.0322251	0.144343	0.142157	0.140153	0.189668	0.10008	0.244219	0.235878	0.20212
38.185	0.202877	0.189047	0.0624454	0.0689354	0.0327366	0.144343	0.142157	0.141055	0.189283	0.10008	0.244569	0.235878	0.20212
38.207	0.202877	0.189047	0.0624454	0.0689354	0.0332481	0.144759	0.141748	0.142406	0.188897	0.10008	0.244919	0.235878	0.20212
38.229	0.202877	0.189047	0.0628821	0.0684991	0.0332481	0.145175	0.141748	0.143308	0.188512	0.10008	0.24527	0.235536	0.201741
38.25	0.202877	0.188641	0.0633188	0.0684991	0.0337596	0.145591	0.141748	0.144209	0.188126	0.10008	0.24527	0.235536	0.201741
38.272	0.203255	0.188641	0.0637555	0.0680628	0.0342711	0.145591	0.14134	0.145561	0.187741	0.10008	0.24562	0.235193	0.201363
38.294	0.203255	0.188641	0.0641921	0.0680628	0.0347826	0.146007	0.14134	0.146462	0.187355	0.10008	0.245971	0.235193	0.201363
38.316	0.203255	0.188641	0.0646288	0.0676265	0.0352941	0.146423	0.14134	0.147364	0.18697	0.10008	0.246321	0.234851	0.200984
38.338	0.203255	0.188235	0.0650655	0.0676265	0.0358056	0.146423	0.140931	0.148265	0.18697	0.10008	0.246671	0.234851	0.200606
38.359	0.203255	0.188235	0.0655022	0.0671902	0.0363171	0.146839	0.140931	0.149166	0.186584	0.10008	0.246671	0.234509	0.200606
38.381	0.203255	0.188235	0.0655022	0.0671902	0.0368286	0.146839	0.140931	0.150518	0.186199	0.10008	0.247022	0.234166	0.200227
38.403	0.203255	0.18783	0.0659389	0.0671902	0.0373402	0.147255	0.140523	0.15142	0.185813	0.10008	0.247372	0.234166	0.200227
38.425	0.203255	0.18783	0.0663755	0.0667539	0.0378517	0.147255	0.140523	0.152321	0.185428	0.10008	0.247722	0.233824	0.199849
38.446	0.203255	0.18783	0.0668122	0.0667539	0.0383632	0.147671	0.140523	0.153222	0.185042	0.10008	0.248073	0.233824	0.19947
38.468	0.203255	0.187424	0.0672489	0.0667539	0.0388747	0.147671	0.140114	0.153673	0.184657	0.10008	0.248073	0.233482	0.19947
38.49	0.203255	0.187424	0.0676856	0.0663176	0.0393862	0.148087	0.140114	0.154574	0.184657	0.100348	0.248423	0.233139	0.199092
38.512	0.203255	0.187424	0.0676856	0.0663176	0.0398977	0.148087	0.140114	0.155475	0.184271	0.100348	0.248774	0.233139	0.198713
38.534	0.202877	0.187018	0.0681223	0.0663176	0.0404092	0.148087	0.140114	0.156377	0.183886	0.100348	0.249124	0.232797	0.198713
38.555	0.202877	0.187018	0.068559	0.0658813	0.0414322	0.148502	0.139706	0.157278	0.1835	0.100348	0.249124	0.232455	0.198335
38.577	0.202877	0.187018	0.0689956	0.0658813	0.0419437	0.148502	0.139706	0.157729	0.183115	0.100615	0.249474	0.232112	0.197956
38.599	0.202877	0.186613	0.0694323	0.0658813	0.0424552	0.148502	0.139706	0.15863	0.183115	0.100615	0.249825	0.232112	0.197956
38.621	0.202498	0.186613	0.0694323	0.0658813	0.0429668	0.148918	0.139706	0.159531	0.182729	0.100615	0.249825	0.23177	0.197578
38.642	0.202498	0.186613	0.069869	0.065445	0.0439898	0.148918	0.139706	0.159982	0.182344	0.100883	0.250175	0.231428	0.197199
38.664	0.20212	0.186613	0.0703057	0.065445	0.0445013	0.148918	0.139297	0.160883	0.181958	0.100883	0.250526	0.231428	0.197199
38.686	0.20212	0.186207	0.0707424	0.065445	0.0450128	0.148918	0.139297	0.161334	0.181958	0.101151	0.250526	0.231085	0.196821
38.708	0.20212	0.186207	0.0707424	0.065445	0.0460358	0.148918	0.139297	0.162235	0.181573	0.101151	0.250876	0.230743	0.196442
38.73	0.201741	0.186207	0.071179	0.065445	0.0465473	0.148918	0.139297	0.162686	0.181187	0.101418	0.251226	0.230401	0.196442
38.751	0.201741	0.186207	0.0716157	0.065445	0.0475703	0.148918	0.139297	0.163587	0.180802	0.101418	0.251226	0.230401	0.196064
38.773	0.201363	0.185801	0.0720524	0.0650087	0.0480818	0.149334	0.138889	0.164038	0.180802	0.101686	0.251577	0.230058	0.196064
38.795	0.201363	0.185801	0.0720524	0.0650087	0.0485934	0.149334	0.138889	0.164939	0.180416	0.101953	0.251577	0.229716	0.195685
38.817	0.200984	0.185801	0.0724891	0.0650087	0.0496164	0.149334	0.138889	0.16539	0.180031	0.101953	0.251927	0.229374	0.195307
38.838	0.200606	0.185801	0.0729258	0.0650087	0.0501279	0.149334	0.138889	0.16584	0.179645	0.102221	0.252278	0.229031	0.195307
38.86	0.200606	0.185801	0.0733624	0.0650087	0.0511509	0.149334	0.138889	0.166291	0.179645	0.102489	0.252278	0.229031	0.194928
38.882	0.200227	0.185801	0.0733624	0.0650087	0.0516624	0.149334	0.138889	0.167192	0.17926	0.102756	0.252628	0.228689	0.194928
38.904	0.200227	0.185396	0.0737991	0.0650087	0.0526854	0.149334	0.138889	0.167643	0.17926	0.102756	0.252628	0.228346	0.19455
38.926	0.199849	0.185396	0.0742358	0.0650087	0.0531969	0.149334	0.138889	0.168094	0.178874	0.103024	0.252978	0.228004	0.19455
38.947	0.19947	0.185396	0.0746725	0.0650087	0.0537084	0.149334	0.13848	0.168544	0.178489	0.103291	0.252978	0.228004	0.194171
38.969	0.19947	0.185396	0.0746725	0.0650087	0.0547315	0.149334	0.13848	0.168995	0.178489	0.103559	0.253329	0.227662	0.194171
38.991	0.199092	0.185396	0.0751092	0.0650087	0.055243	0.149334	0.13848	0.169446	0.178103	0.103827	0.253329	0.227319	0.193793
39.013	0.198713	0.185396	0.0755459	0.0650087	0.056266	0.149334	0.13848	0.170347	0.178103	0.104094	0.253679	0.226977	0.193793
39.034	0.198713	0.185396	0.0755459	0.0650087	0.0567775	0.149334	0.13848	0.170798	0.177718	0.104362	0.253679	0.226977	0.193793
39.056	0.198335	0.185396	0.0759825	0.0650087	0.0578005	0.149334	0.13848	0.171248	0.177332	0.104629	0.254029	0.226635	0.193414
39.078	0.197956	0.185396	0.0764192	0.0650087	0.058312	0.149334	0.13848	0.171699	0.177332	0.104897	0.25438	0.226292	0.193414
39.1	0.197956	0.185396	0.0768559	0.0650087	0.0588235	0.149334	0.13848	0.17215	0.176947	0.105165	0.25438	0.22595	0.193414
39.122	0.197578	0.185396	0.0768559	0.0650087	0.0598465	0.149334	0.13848	0.17215	0.176947	0.105432	0.25473	0.22595	0.193036
39.143	0.197199	0.185396	0.0772926	0.0650087	0.0603581	0.149334	0.13848	0.1726	0.176561	0.105967	0.25473	0.225608	0.193036
39.165	0.197199	0.185396	0.0777293	0.0650087	0.0613811	0.149334	0.13848	0.173051	0.176561	0.106235	0.255081	0.225265	0.193036
39.187	0.196821	0.185396	0.0781659	0.0650087	0.0618926	0.149334	0.13848	0.173502	0.176176	0.106503	0.255081	0.225265	0.193036
39.209	0.196442	0.185396	0.0781659	0.0650087	0.0629156	0.149334	0.13848	0.173952	0.176176	0.10677	0.255431	0.224923	0.192657
39.23	0.196442	0.185396	0.0786026	0.0650087	0.0634271	0.149334	0.138889	0.174403	0.176176	0.107305	0.255431	0.224581	0.192657
39.252	0.196064	0.185396	0.0790393	0.0650087	0.0639386	0.149334	0.138889	0.174854	0.17579	0.107573	0.255781	0.224581	0.192657
39.274	0.196064	0.185396	0.079476	0.0650087	0.0649616	0.149334	0.138889	0.174854	0.17579	0.107841	0.255781	0.224238	0.192657
39.296	0.195685	0.185396	0.079476	0.0650087	0.0654731	0.14975	0.138889	0.175304	0.175405	0.108376	0.256132	0.223896	0.192657
39.318	0.195307	0.185396	0.0799127	0.0650087	0.0664962	0.14975	0.138889	0.175755	0.175405	0.108643	0.256482	0.223896	0.192657
39.339	0.195307	0.185396	0.0803493	0.0645724	0.0670077	0.14975	0.139297	0.176205	0.175405	0.109178	0.256482	0.223554	0.192657
39.361	0.194928	0.185801	0.080786	0.0645724	0.0675192	0.14975	0.139297	0.176205	0.175019	0.109446	0.256833	0.223554	0.192657
39.383	0.194928	0.185801	0.0812227	0.0645724	0.0685422	0.150166	0.139297	0.176656	0.175019	0.109981	0.256833	0.223211	0.192657
39.405	0.19455	0.185801	0.0812227	0.0645724	0.0690537	0.150166	0.139706	0.177107	0.175019	0.110516	0.257183	0.222869	0.192657
39.426	0.19455	0.185801	0.0816594	0.0645724	0.0695652	0.150166	0.139706	0.177107	0.175019	0.110784	0.257533	0.222869	0.192657
39.448	0.194171	0.185801	0.0820961	0.0645724	0.0705882	0.150582	0.139706	0.177557	0.174634	0.111319	0.257533	0.222527	0.192657
39.47	0.194171	0.185801	0.0825328	0.0645724	0.0710997	0.150582	0.140114	0.177557	0.174634	0.111854	0.257884	0.222527	0.193036
39.492	0.193793	0.185801	0.0825328	0.0645724	0.0716113	0.150998	0.140114	0.178008	0.174634	0.11239	0.258234	0.222184	0.193036
39.514	0.193793	0.185801	0.0829694	0.0641361	0.0726343	0.150998	0.140523	0.178008	0.174634	0.112657	0.258584	0.222184	0.193036
39.535	0.193793	0.186207	0.0834061	0.0641361	0.0731458	0.150998	0.140523	0.178459	0.174634	0.113192	0.258584	0.221842	0.193036
39.557	0.193414	0.186207	0.0838428	0.0641361	0.0736573	0.151414	0.140931	0.178459	0.174634	0.113728	0.258935	0.221842	0.193036
39.579	0.193414	0.186207	0.0838428	0.0641361	0.0746803	0.15183	0.14134	0.178909	0.174248	0.114263	0.259285	0.221842	0.193414
39.601	0.193414	0.186207	0.0842795	0.0636998	0.0751918	0.15183	0.14134	0.178909	0.174248	0.114798	0.259636	0.221499	0.193414
39.623	0.193036	0.186207	0.0847162	0.0636998	0.0757033	0.152246	0.141748	0.17936	0.174248	0.115333	0.259986	0.221499	0.193414
39.644	0.193036	0.186207	0.0851528	0.0636998	0.0767263	0.152246	0.142157	0.17936	0.174248	0.115868	0.259986	0.221157	0.193793
39.666	0.193036	0.186613	0.0855895	0.0632635	0.0772379	0.152662	0.142157	0.17936	0.174248	0.116404	0.260336	0.221157	0.193793
39.688	0.193036	0.186613	0.0855895	0.0632635	0.0777494	0.153078	0.142565	0.179811	0.174248	0.116939	0.260687	0.221157	0.193793
39.71	0.192657	0.186613	0.0860262	0.0632635	0.0787724	0.153494	0.142974	0.179811	0.174248	0.117742	0.261037	0.220815	0.194171
39.731	0.192657	0.186613	0.0864629	0.0628272	0.0792839	0.153494	0.143382	0.179811	0.174248	0.118277	0.261388	0.220815	0.194171
39.753	0.192657	0.186613	0.0868996	0.0628272	0.0797954	0.15391	0.143791	0.180261	0.174248	0.118812	0.261738	0.220815	0.194171
39.775	0.192657	0.186613	0.0868996	0.0628272	0.0803069	0.154326	0.144199	0.180261	0.174248	0.119347	0.262088	0.220472	0.19455
39.797	0.192657	0.187018	0.0873362	0.0623909	0.0813299	0.154742	0.144608	0.180261	0.174248	0.12015	0.262439	0.220472	0.19455
39.819	0.192657	0.187018	0.0877729	0.0623909	0.0818414	0.155158	0.145016	0.180261	0.174248	0.120685	0.262789	0.220472	0.194928
39.84	0.192657	0.187018	0.0882096	0.0619546	0.0823529	0.155574	0.145425	0.180261	0.174248	0.12122	0.263139	0.220472	0.194928
39.862	0.192657	0.187018	0.0882096	0.0619546	0.0828645	0.15599	0.145833	0.180261	0.174248	0.122023	0.26349	0.22013	0.195307
39.884	0.192657	0.187018	0.0886463	0.0615183	0.0838875	0.156406	0.146242	0.180261	0.174248	0.122558	0.26384	0.22013	0.195307
39.906	0.192657	0.187018	0.089083	0.0615183	0.084399	0.156822	0.14665	0.180261	0.174634	0.123361	0.26384	0.22013	0.195685
39.927	0.192657	0.187424	0.0895197	0.061082	0.0849105	0.157238	0.147059	0.180261	0.174634	0.124164	0.264191	0.219788	0.195685
39.949	0.192657	0.187424	0.0895197	0.061082	0.085422	0.157654	0.147876	0.180261	0.174634	0.124699	0.264541	0.219788	0.196064
39.971	0.193036	0.187424	0.0899563	0.0606457	0.086445	0.15807	0.148284	0.180261	0.174634	0.125502	0.264891	0.219788	0.196064
39.993	0.193036	0.187424	0.090393	0.0606457	0.0869565	0.158486	0.148693	0.180261	0.174634	0.126305	0.265592	0.219788	0.196442
40.015	0.193036	0.187424	0.0908297	0.0602094	0.087468	0.158902	0.149101	0.180261	0.174634	0.12684	0.265943	0.219788	0.196442
40.036	0.193036	0.18783	0.0908297	0.0602094	0.0879795	0.159318	0.149918	0.180261	0.175019	0.127642	0.266293	0.219445	0.196442
40.058	0.193036	0.18783	0.0912664	0.0597731	0.0890026	0.159734	0.150327	0.180261	0.175019	0.128445	0.266643	0.219445	0.196821
40.08	0.193414	0.18783	0.0917031	0.0593368	0.0895141	0.16015	0.150735	0.179811	0.175019	0.129248	0.266994	0.219445	0.196821
40.102	0.193414	0.18783	0.0917031	0.0593368	0.0900256	0.160566	0.151144	0.179811	0.175405	0.130051	0.267344	0.219445	0.197199
40.123	0.193414	0.18783	0.0921397	0.0589005	0.0905371	0.161398	0.151961	0.179811	0.175405	0.130586	0.267694	0.219445	0.197199
40.145	0.193793	0.188235	0.0925764	0.0589005	0.0910486	0.161814	0.152369	0.17936	0.175405	0.131389	0.268045	0.219103	0.197578
40.167	0.193793	0.188235	0.0925764	0.0584642	0.0920716	0.16223	0.152778	0.17936	0.17579	0.132192	0.268395	0.219103	0.197578
40.189	0.193793	0.188235	0.0930131	0.0584642	0.0925831	0.162646	0.153595	0.178909	0.17579	0.132994	0.268746	0.219103	0.197956
40.211	0.194171	0.188235	0.0934498	0.0580279	0.0930946	0.163062	0.154003	0.178909	0.176176	0.133797	0.269096	0.219103	0.197956
40.232	0.194171	0.188641	0.0934498	0.0575916	0.0936061	0.163478	0.154412	0.178459	0.176176	0.1346	0.269446	0.219103	0.197956
40.254	0.194171	0.188641	0.0938865	0.0575916	0.0941176	0.163894	0.155229	0.178459	0.176176	0.135403	0.269797	0.218761	0.198335
40.276	0.19455	0.188641	0.0938865	0.0571553	0.0951407	0.164309	0.155637	0.178008	0.176561	0.136206	0.270147	0.218761	0.198335
40.298	0.19455	0.188641	0.0943231	0.0571553	0.0956522	0.165141	0.156046	0.177557	0.176947	0.137008	0.270498	0.218761	0.198713
40.319	0.194928	0.189047	0.0947598	0.056719	0.0961637	0.165557	0.156863	0.177107	0.176947	0.137811	0.270848	0.218761	0.198713
40.341	0.194928	0.189047	0.0947598	0.056719	0.0966752	0.165973	0.157271	0.177107	0.177332	0.138881	0.271198	0.218761	0.198713
40.363	0.195307	0.189047	0.0951965	0.0562827	0.0971867	0.166389	0.15768	0.176656	0.177332	0.139684	0.271549	0.218761	0.199092
40.385	0.195307	0.189452	0.0951965	0.0558464	0.0976982	0.166805	0.158497	0.176205	0.177718	0.140487	0.271899	0.218418	0.199092
40.407	0.195685	0.189452	0.0956332	0.0558464	0.0987212	0.167221	0.158905	0.175755	0.178103	0.14129	0.272249	0.218418	0.19947
40.428	0.195685	0.189452	0.0956332	0.0554101	0.0992327	0.167637	0.159314	0.175304	0.178103	0.142093	0.2726	0.218418	0.19947
40.45	0.196064	0.189858	0.0956332	0.0554101	0.0997442	0.168053	0.160131	0.174854	0.178489	0.142895	0.27295	0.218418	0.19947
40.472	0.196064	0.189858	0.0960699	0.0549738	0.100256	0.168469	0.160539	0.174403	0.178874	0.143698	0.273301	0.218418	0.199849
40.494	0.196442	0.190264	0.0960699	0.0549738	0.100767	0.168885	0.160948	0.173952	0.17926	0.144501	0.273651	0.218418	0.199849
40.515	0.196442	0.190264	0.0965066	0.0545375	0.101279	0.169301	0.161356	0.173502	0.179645	0.145304	0.274001	0.218076	0.200227
40.537	0.196442	0.190669	0.0965066	0.0545375	0.10179	0.169717	0.161765	0.173051	0.180031	0.146107	0.274352	0.218076	0.200227
40.559	0.196821	0.190669	0.0965066	0.0541012	0.102813	0.169717	0.162582	0.17215	0.180031	0.146909	0.274702	0.218076	0.200227
40.581	0.196821	0.191075	0.0969432	0.0541012	0.103325	0.170133	0.16299	0.171699	0.180416	0.147712	0.275053	0.218076	0.200606
40.603	0.197199	0.191075	0.0969432	0.0541012	0.103836	0.170549	0.163399	0.171248	0.180802	0.148515	0.275403	0.218076	0.200606
40.624	0.197199	0.191481	0.0969432	0.0536649	0.104348	0.170965	0.163807	0.170798	0.181187	0.149318	0.275753	0.218076	0.200984
40.646	0.197578	0.191481	0.0973799	0.0536649	0.104859	0.171381	0.164216	0.169896	0.181573	0.150388	0.276104	0.218076	0.200984
40.668	0.197578	0.191886	0.0973799	0.0532286	0.105371	0.171381	0.164624	0.169446	0.181958	0.151191	0.276454	0.218076	0.201363
40.69	0.197956	0.191886	0.0973799	0.0532286	0.105882	0.171797	0.165033	0.168544	0.182729	0.151994	0.276804	0.218076	0.201363
40.711	0.197956	0.192292	0.0973799	0.0532286	0.106394	0.171797	0.165441	0.168094	0.183115	0.152529	0.277155	0.218076	0.201741
40.733	0.197956	0.192698	0.0978166	0.0527923	0.106905	0.172213	0.16585	0.167192	0.1835	0.153332	0.277505	0.217734	0.201741
40.755	0.198335	0.192698	0.0978166	0.0527923	0.107417	0.172629	0.166258	0.166742	0.183886	0.154134	0.277856	0.217734	0.20212
40.777	0.198335	0.193103	0.0978166	0.0527923	0.107928	0.172629	0.166667	0.16584	0.184271	0.154937	0.277856	0.217734	0.20212
40.799	0.198713	0.193509	0.0978166	0.0527923	0.10844	0.173045	0.167075	0.16539	0.184657	0.15574	0.278206	0.217734	0.202498
40.82	0.198713	0.193509	0.0978166	0.0527923	0.109463	0.173045	0.167484	0.164489	0.185428	0.156543	0.278556	0.217734	0.202498
40.842	0.198713	0.193915	0.0982533	0.052356	0.109974	0.173045	0.167892	0.163587	0.185813	0.157345	0.278907	0.217734	0.202877
40.864	0.199092	0.19432	0.0982533	0.052356	0.110486	0.173461	0.168301	0.163137	0.186199	0.158148	0.279257	0.217734	0.202877
40.886	0.199092	0.194726	0.0982533	0.052356	0.110997	0.173461	0.168709	0.162235	0.18697	0.158951	0.279608	0.217734	0.203255
40.907	0.19947	0.195132	0.0982533	0.052356	0.111509	0.173461	0.169118	0.161334	0.187355	0.159486	0.279608	0.218076	0.203255
40.929	0.19947	0.195132	0.0982533	0.052356	0.11202	0.173461	0.169526	0.160883	0.187741	0.160289	0.279958	0.218076	0.203634
40.951	0.19947	0.195538	0.0982533	0.052356	0.112532	0.173877	0.169526	0.159982	0.188512	0.161092	0.280308	0.218076	0.204012
40.973	0.199849	0.195943	0.0982533	0.052356	0.113043	0.173877	0.169935	0.159081	0.188897	0.161895	0.280308	0.218076	0.204012
40.995	0.199849	0.196349	0.0982533	0.052356	0.113043	0.173877	0.170343	0.15863	0.189668	0.16243	0.280659	0.218076	0.204391
41.016	0.200227	0.196755	0.0982533	0.052356	0.113555	0.173877	0.170752	0.157729	0.190054	0.163233	0.281009	0.218076	0.204769
41.038	0.200227	0.19716	0.0982533	0.052356	0.114066	0.173877	0.17116	0.156827	0.190825	0.164035	0.281009	0.218418	0.205148
41.06	0.200227	0.197566	0.0982533	0.052356	0.114578	0.173877	0.17116	0.155926	0.19121	0.164571	0.281359	0.218418	0.205148
41.082	0.200606	0.197972	0.09869	0.052356	0.11509	0.173877	0.171569	0.155025	0.191981	0.165373	0.281359	0.218418	0.205526
41.103	0.200606	0.198377	0.09869	0.052356	0.115601	0.173877	0.171977	0.154574	0.192753	0.165908	0.28171	0.218761	0.205905
41.125	0.200984	0.198783	0.09869	0.0527923	0.116113	0.173877	0.171977	0.153673	0.193138	0.166711	0.28171	0.218761	0.206283
41.147	0.200984	0.199189	0.09869	0.0527923	0.116624	0.173877	0.172386	0.152772	0.193909	0.167514	0.28206	0.218761	0.206662
41.169	0.201363	0.199594	0.09869	0.0527923	0.117136	0.173877	0.172794	0.15187	0.194295	0.168049	0.28206	0.219103	0.206662
41.191	0.201363	0.2	0.09869	0.0527923	0.117647	0.173877	0.173203	0.15142	0.195066	0.168852	0.282411	0.219103	0.20704
41.212	0.201741	0.200406	0.09869	0.0527923	0.117647	0.173877	0.173203	0.150518	0.195837	0.169387	0.282411	0.219445	0.207419
41.234	0.201741	0.200811	0.09869	0.0532286	0.118159	0.173461	0.173611	0.149617	0.196222	0.17019	0.282761	0.219445	0.207797
41.256	0.20212	0.201217	0.09869	0.0532286	0.11867	0.173461	0.173611	0.148716	0.196993	0.170725	0.282761	0.219788	0.208176
41.278	0.20212	0.201623	0.09869	0.0532286	0.119182	0.173461	0.17402	0.147814	0.197764	0.171528	0.282761	0.22013	0.208554
41.299	0.202498	0.202028	0.09869	0.0536649	0.119693	0.173461	0.174428	0.147364	0.198535	0.172063	0.283111	0.22013	0.208933
41.321	0.202498	0.202434	0.0991266	0.0536649	0.119693	0.173461	0.174428	0.146462	0.198921	0.172598	0.283111	0.220472	0.209311
41.343	0.202877	0.203245	0.0991266	0.0541012	0.120205	0.173045	0.174837	0.145561	0.199692	0.173401	0.283111	0.220815	0.20969
41.365	0.202877	0.203651	0.0991266	0.0541012	0.120716	0.173045	0.174837	0.14511	0.200463	0.173936	0.283111	0.221157	0.210068
41.387	0.203255	0.204057	0.0991266	0.0541012	0.120716	0.173045	0.175245	0.144209	0.201234	0.174739	0.283111	0.221499	0.210447
41.408	0.203255	0.204462	0.0991266	0.0545375	0.121228	0.173045	0.175245	0.143308	0.201619	0.175274	0.283462	0.221842	0.211204
41.43	0.203634	0.204868	0.0995633	0.0545375	0.121739	0.172629	0.175654	0.142857	0.20239	0.176077	0.283462	0.222184	0.211582
41.452	0.204012	0.205274	0.0995633	0.0549738	0.121739	0.172629	0.175654	0.141956	0.203161	0.176612	0.283462	0.222527	0.211961
41.474	0.204012	0.20568	0.0995633	0.0549738	0.122251	0.172629	0.176062	0.141055	0.203932	0.177147	0.283462	0.222869	0.212339
41.495	0.204391	0.206491	0.0995633	0.0554101	0.122762	0.172213	0.176062	0.140604	0.204318	0.17795	0.283462	0.223211	0.212718
41.517	0.204769	0.206897	0.1	0.0554101	0.122762	0.172213	0.176471	0.139703	0.205089	0.178485	0.283462	0.223896	0.213475
41.539	0.205148	0.207302	0.1	0.0558464	0.123274	0.172213	0.176471	0.139252	0.20586	0.179288	0.283462	0.224238	0.213853
41.561	0.205148	0.207708	0.1	0.0558464	0.123274	0.172213	0.176879	0.138351	0.206631	0.179823	0.283462	0.224581	0.214232
41.583	0.205526	0.208114	0.100437	0.0562827	0.123785	0.171797	0.176879	0.1379	0.207402	0.180359	0.283462	0.225265	0.21461
41.604	0.205905	0.208519	0.100437	0.0562827	0.123785	0.171797	0.177288	0.137449	0.207787	0.181161	0.283462	0.225608	0.215367
41.626	0.206283	0.209331	0.100873	0.0562827	0.124297	0.171797	0.177288	0.136548	0.208558	0.181697	0.283462	0.226292	0.215746
41.648	0.206662	0.209736	0.100873	0.056719	0.124297	0.171797	0.177696	0.136097	0.209329	0.182499	0.283462	0.226977	0.216124
41.67	0.206662	0.210142	0.10131	0.056719	0.124297	0.171381	0.177696	0.135196	0.2101	0.183035	0.283462	0.227319	0.216881
41.691	0.20704	0.210548	0.10131	0.0571553	0.124808	0.171381	0.177696	0.134745	0.210486	0.183837	0.283462	0.228004	0.21726
41.713	0.207419	0.210953	0.101747	0.0571553	0.124808	0.171381	0.178105	0.134295	0.211257	0.184372	0.283462	0.228689	0.217638
41.735	0.207797	0.211359	0.101747	0.0571553	0.124808	0.171381	0.178105	0.133844	0.212028	0.185175	0.283462	0.229374	0.218395
41.757	0.208176	0.211765	0.102183	0.0575916	0.12532	0.170965	0.178513	0.133393	0.212799	0.185978	0.283111	0.230058	0.218774
41.779	0.208554	0.212576	0.10262	0.0575916	0.12532	0.170965	0.178513	0.132492	0.213184	0.186513	0.283111	0.230743	0.219531
41.8	0.208933	0.212982	0.10262	0.0575916	0.12532	0.170965	0.178513	0.132041	0.213955	0.187316	0.283111	0.231428	0.219909
41.822	0.209311	0.213387	0.103057	0.0580279	0.12532	0.170965	0.178922	0.131591	0.214726	0.187851	0.283111	0.232112	0.220666
41.844	0.20969	0.213793	0.103493	0.0580279	0.125831	0.170965	0.178922	0.13114	0.215497	0.188654	0.283111	0.232797	0.221045
41.866	0.210068	0.214199	0.103493	0.0580279	0.125831	0.170965	0.178922	0.130689	0.215883	0.189457	0.282761	0.233482	0.221802
41.887	0.210447	0.214604	0.10393	0.0580279	0.125831	0.170965	0.17933	0.130239	0.216654	0.19026	0.282761	0.234509	0.22218
41.909	0.211204	0.21501	0.104367	0.0584642	0.125831	0.170965	0.17933	0.129788	0.217425	0.190795	0.282761	0.235193	0.222937
41.931	0.211582	0.215416	0.104803	0.0584642	0.125831	0.170965	0.17933	0.129338	0.218196	0.191598	0.282761	0.23622	0.223316
41.953	0.211961	0.215822	0.104803	0.0584642	0.125831	0.170965	0.179739	0.129338	0.218581	0.1924	0.282411	0.236905	0.224073
41.975	0.212339	0.216227	0.10524	0.0584642	0.125831	0.170549	0.179739	0.128887	0.219352	0.193203	0.282411	0.237932	0.224451
41.996	0.212718	0.216633	0.105677	0.0584642	0.125831	0.170549	0.179739	0.128436	0.220123	0.194006	0.282411	0.238617	0.225208
42.018	0.213475	0.217039	0.106114	0.0584642	0.125831	0.170549	0.180147	0.127986	0.220509	0.194809	0.28206	0.239644	0.225587
42.04	0.213853	0.217444	0.106114	0.0584642	0.125831	0.170965	0.180147	0.127986	0.22128	0.195611	0.28206	0.240329	0.226344
42.062	0.214232	0.21785	0.10655	0.0580279	0.125831	0.170965	0.180147	0.127535	0.222051	0.196414	0.28206	0.241356	0.226722
42.083	0.21461	0.218256	0.106987	0.0580279	0.125831	0.170965	0.180147	0.127084	0.222436	0.197217	0.28206	0.242383	0.227479
42.105	0.215367	0.218661	0.107424	0.0580279	0.125831	0.170965	0.180556	0.127084	0.223207	0.198287	0.28171	0.24341	0.227858
42.127	0.215746	0.219067	0.10786	0.0580279	0.125831	0.170965	0.180556	0.126634	0.223978	0.19909	0.28171	0.244437	0.228615
42.149	0.216124	0.219473	0.10786	0.0575916	0.125831	0.170965	0.180556	0.126183	0.224364	0.199893	0.281359	0.245464	0.228993
42.171	0.216881	0.219473	0.108297	0.0575916	0.125831	0.170965	0.180556	0.126183	0.225135	0.200696	0.281359	0.246149	0.22975
42.192	0.21726	0.219878	0.108734	0.0571553	0.125831	0.170965	0.180964	0.125732	0.22552	0.201499	0.281359	0.247176	0.230129
42.214	0.217638	0.220284	0.10917	0.0571553	0.12532	0.170965	0.180964	0.125732	0.226291	0.202569	0.281009	0.248203	0.230886
42.236	0.218395	0.22069	0.109607	0.056719	0.12532	0.170965	0.180964	0.125282	0.227062	0.203372	0.281009	0.24923	0.231643
42.258	0.218774	0.221095	0.109607	0.056719	0.12532	0.170965	0.180964	0.125282	0.227448	0.204174	0.280659	0.250257	0.232021
42.279	0.219531	0.221095	0.110044	0.0562827	0.12532	0.171381	0.180964	0.124831	0.228219	0.205245	0.280659	0.251284	0.232778
42.301	0.219909	0.221501	0.11048	0.0558464	0.124808	0.171381	0.181373	0.124831	0.228604	0.206048	0.280659	0.252311	0.233157
42.323	0.220666	0.221907	0.110917	0.0554101	0.124808	0.171381	0.181373	0.124831	0.229375	0.207118	0.280308	0.253338	0.233914
42.345	0.221045	0.221907	0.110917	0.0549738	0.124808	0.171381	0.181373	0.12438	0.229761	0.207921	0.280308	0.254707	0.234292
42.367	0.221802	0.222312	0.111354	0.0545375	0.124808	0.171381	0.181373	0.12438	0.230532	0.208991	0.279958	0.255734	0.235049
42.388	0.22218	0.222312	0.11179	0.0541012	0.124297	0.171381	0.181373	0.12438	0.230918	0.209794	0.279958	0.256761	0.235428
42.41	0.222937	0.222718	0.112227	0.0536649	0.124297	0.171381	0.181373	0.12393	0.231303	0.210864	0.279608	0.257788	0.236185
42.432	0.223316	0.223124	0.112227	0.0532286	0.123785	0.171797	0.181373	0.12393	0.232074	0.211667	0.279608	0.258815	0.236563
42.454	0.224073	0.223124	0.112664	0.0527923	0.123785	0.171797	0.181781	0.12393	0.23246	0.212737	0.279257	0.259843	0.236942
42.475	0.224451	0.223529	0.1131	0.052356	0.123785	0.171797	0.181781	0.123479	0.233231	0.21354	0.279257	0.26087	0.237699
42.497	0.225208	0.223529	0.1131	0.0519197	0.123274	0.171797	0.181781	0.123479	0.233616	0.214611	0.278907	0.261554	0.238077
42.519	0.225587	0.223935	0.113537	0.0514834	0.123274	0.171797	0.181781	0.123479	0.234002	0.215413	0.278907	0.262581	0.238834
42.541	0.226344	0.223935	0.113974	0.0506108	0.123274	0.171797	0.181781	0.123479	0.234387	0.216484	0.278556	0.263608	0.239213
42.563	0.226722	0.223935	0.113974	0.0501745	0.122762	0.171797	0.181781	0.123028	0.235158	0.217287	0.278556	0.264635	0.239591
42.584	0.227479	0.224341	0.11441	0.0497382	0.122762	0.171797	0.181781	0.123028	0.235544	0.218357	0.278206	0.265662	0.240348
42.606	0.227858	0.224341	0.11441	0.0488656	0.122251	0.172213	0.181781	0.123028	0.235929	0.21916	0.278206	0.266689	0.240727
42.628	0.228615	0.224341	0.114847	0.0484293	0.122251	0.172213	0.181781	0.123028	0.236315	0.22023	0.277856	0.267374	0.241105
42.65	0.228993	0.224746	0.115284	0.0475567	0.121739	0.172213	0.181781	0.123028	0.237086	0.221301	0.277505	0.268401	0.241862
42.672	0.22975	0.224746	0.115284	0.0471204	0.121739	0.172213	0.181781	0.122578	0.237471	0.222103	0.277505	0.269428	0.242241
42.693	0.230129	0.224746	0.115721	0.0462478	0.121739	0.172213	0.181781	0.122578	0.237857	0.223174	0.277155	0.270113	0.242619
42.715	0.230886	0.224746	0.115721	0.0453752	0.121228	0.172213	0.181781	0.122578	0.238242	0.223976	0.277155	0.27114	0.242998
42.737	0.231643	0.224746	0.116157	0.0449389	0.121228	0.172213	0.181781	0.122578	0.238628	0.225047	0.276804	0.271825	0.243755
42.759	0.232021	0.224746	0.116157	0.0440663	0.120716	0.172213	0.181373	0.122127	0.239013	0.22585	0.276454	0.272852	0.244133
42.78	0.232778	0.225152	0.116157	0.0431937	0.120716	0.172213	0.181373	0.122127	0.239399	0.22692	0.276454	0.273536	0.244512
42.802	0.233157	0.225152	0.116594	0.0427574	0.120716	0.172213	0.181373	0.122127	0.239784	0.22799	0.276104	0.274221	0.24489
42.824	0.233914	0.225152	0.116594	0.0418848	0.120205	0.172213	0.181373	0.122127	0.240555	0.228793	0.276104	0.274906	0.245269
42.846	0.234292	0.225152	0.117031	0.0410122	0.120205	0.172213	0.181373	0.122127	0.240941	0.229864	0.275753	0.275933	0.245647
42.868	0.235049	0.225152	0.117031	0.0401396	0.120205	0.172213	0.181373	0.121676	0.241326	0.230666	0.275403	0.276618	0.246026
42.889	0.235428	0.225152	0.117031	0.0397033	0.120205	0.172213	0.180964	0.121676	0.241712	0.231737	0.275403	0.277302	0.246404
42.911	0.236185	0.225152	0.117467	0.0388307	0.119693	0.172213	0.180964	0.121676	0.241712	0.232539	0.275053	0.277987	0.246783
42.933	0.236563	0.225152	0.117467	0.0379581	0.119693	0.172213	0.180964	0.121676	0.242097	0.23361	0.275053	0.278672	0.247161
42.955	0.236942	0.224746	0.117904	0.0370855	0.119693	0.172213	0.180964	0.121676	0.242483	0.23468	0.274702	0.279014	0.24754
42.976	0.237699	0.224746	0.117904	0.0362129	0.119693	0.171797	0.180556	0.121226	0.242868	0.235483	0.274702	0.279699	0.247918
42.998	0.238077	0.224746	0.117904	0.0357766	0.119182	0.171797	0.180556	0.121226	0.243254	0.236553	0.274352	0.280383	0.248297
43.02	0.238834	0.224746	0.117904	0.034904	0.119182	0.171797	0.180556	0.121226	0.243639	0.237624	0.274001	0.280726	0.248675
43.042	0.239213	0.224746	0.118341	0.0340314	0.119182	0.171797	0.180147	0.121226	0.244025	0.238427	0.274001	0.28141	0.249054
43.064	0.239591	0.224746	0.118341	0.0331588	0.119182	0.171797	0.180147	0.121226	0.24441	0.239497	0.273651	0.281753	0.249432
43.085	0.240348	0.224746	0.118341	0.0322862	0.119182	0.171381	0.179739	0.120775	0.244796	0.240567	0.273651	0.282438	0.249811
43.107	0.240727	0.224746	0.118777	0.0314136	0.119182	0.171381	0.179739	0.120775	0.244796	0.24137	0.273651	0.28278	0.250189
43.129	0.241105	0.224341	0.118777	0.030541	0.119182	0.171381	0.179739	0.120775	0.245181	0.24244	0.273301	0.283122	0.250568
43.151	0.241862	0.224341	0.118777	0.0301047	0.119182	0.171381	0.17933	0.120775	0.245567	0.243511	0.273301	0.283465	0.250946
43.172	0.242241	0.224341	0.118777	0.0292321	0.119182	0.170965	0.17933	0.120775	0.245952	0.244314	0.27295	0.284149	0.251325
43.194	0.242619	0.224341	0.119214	0.0283595	0.119182	0.170965	0.178922	0.120775	0.246338	0.245384	0.27295	0.284492	0.251703
43.216	0.242998	0.224341	0.119214	0.0274869	0.119693	0.170965	0.178922	0.120324	0.246338	0.246454	0.27295	0.284492	0.252082
43.238	0.243755	0.224341	0.119214	0.0266143	0.119693	0.170549	0.178513	0.120324	0.246723	0.247525	0.2726	0.284834	0.25246
43.26	0.244133	0.223935	0.119214	0.0257417	0.119693	0.170549	0.178513	0.120324	0.247109	0.248595	0.2726	0.285176	0.252839
43.281	0.244512	0.223935	0.119651	0.0248691	0.119693	0.170133	0.178105	0.120324	0.247109	0.249398	0.2726	0.285519	0.253217
43.303	0.24489	0.223935	0.119651	0.0244328	0.120205	0.170133	0.178105	0.120324	0.247494	0.250468	0.2726	0.285861	0.253596
43.325	0.245269	0.223935	0.119651	0.0235602	0.120205	0.169717	0.178105	0.120324	0.24788	0.251539	0.2726	0.285861	0.253974
43.347	0.245647	0.223935	0.119651	0.0226876	0.120205	0.169717	0.177696	0.120324	0.248265	0.252609	0.2726	0.286203	0.254353
43.368	0.246026	0.223935	0.119651	0.021815	0.120716	0.169717	0.177696	0.120324	0.248265	0.253679	0.2726	0.286203	0.254731
43.39	0.246404	0.223935	0.120087	0.0213787	0.120716	0.169301	0.177288	0.120324	0.248651	0.25475	0.2726	0.286203	0.25511
43.412	0.246783	0.223529	0.120087	0.0205061	0.121228	0.169301	0.177288	0.120324	0.248651	0.25582	0.2726	0.286546	0.255488
43.434	0.247161	0.223529	0.120087	0.0196335	0.121228	0.168885	0.176879	0.120324	0.249036	0.256891	0.2726	0.286546	0.255867
43.456	0.24754	0.223529	0.120087	0.0191972	0.121739	0.168885	0.176879	0.120324	0.249422	0.257961	0.2726	0.286546	0.256245
43.477	0.247918	0.223529	0.120524	0.0183246	0.121739	0.168469	0.176471	0.120324	0.249422	0.259031	0.2726	0.286546	0.256624
43.499	0.248297	0.223529	0.120524	0.017452	0.122251	0.168469	0.176471	0.120324	0.249807	0.260369	0.2726	0.286546	0.257002
43.521	0.248675	0.223529	0.120524	0.0170157	0.122762	0.168053	0.176062	0.120324	0.249807	0.26144	0.2726	0.286888	0.257381
43.543	0.249054	0.223529	0.120524	0.0161431	0.123274	0.168053	0.176062	0.120775	0.250193	0.26251	0.27295	0.286546	0.257759
43.564	0.249432	0.223529	0.120961	0.0157068	0.123274	0.167637	0.175654	0.120775	0.250193	0.26358	0.27295	0.286546	0.258138
43.586	0.249811	0.223529	0.120961	0.0148342	0.123785	0.167637	0.175654	0.120775	0.250578	0.264651	0.27295	0.286546	0.258516
43.608	0.250189	0.223529	0.120961	0.0143979	0.124297	0.167221	0.175654	0.120775	0.250578	0.265989	0.273301	0.286546	0.258895
43.63	0.250568	0.223935	0.120961	0.0135253	0.124808	0.167221	0.175245	0.121226	0.250964	0.267059	0.273301	0.286546	0.259273
43.652	0.250946	0.223935	0.121397	0.013089	0.12532	0.166805	0.175245	0.121226	0.250964	0.26813	0.273651	0.286546	0.259652
43.673	0.251325	0.223935	0.121397	0.0126527	0.125831	0.166805	0.175245	0.121676	0.251349	0.269467	0.273651	0.286203	0.26003
43.695	0.251703	0.223935	0.121397	0.0122164	0.126343	0.166389	0.174837	0.121676	0.251349	0.270538	0.274001	0.286203	0.260409
43.717	0.252082	0.223935	0.121834	0.0113438	0.126854	0.166389	0.174837	0.122127	0.251735	0.271876	0.274352	0.286203	0.260787
43.739	0.25246	0.224341	0.121834	0.0109075	0.127366	0.165973	0.174837	0.122127	0.251735	0.272946	0.274702	0.285861	0.261544
43.76	0.252839	0.224341	0.121834	0.0104712	0.127877	0.165973	0.174428	0.122578	0.25212	0.274017	0.274702	0.285861	0.261923
43.782	0.253217	0.224341	0.122271	0.0100349	0.128389	0.165973	0.174428	0.122578	0.25212	0.275355	0.275053	0.285519	0.262301
43.804	0.253596	0.224746	0.122271	0.0095986	0.1289	0.165557	0.174428	0.123028	0.252506	0.276425	0.275403	0.285519	0.26268
43.826	0.253974	0.224746	0.122271	0.0091623	0.129412	0.165557	0.174428	0.123479	0.252506	0.277763	0.275753	0.285176	0.263058
43.848	0.254353	0.224746	0.122707	0.008726	0.130435	0.165557	0.17402	0.12393	0.252506	0.279101	0.276104	0.285176	0.263437
43.869	0.254731	0.225152	0.122707	0.0082897	0.130946	0.165141	0.17402	0.12438	0.252891	0.280171	0.276454	0.284834	0.263815
43.891	0.25511	0.225152	0.123144	0.0078534	0.131458	0.165141	0.17402	0.124831	0.252891	0.281509	0.277155	0.284834	0.264572
43.913	0.255488	0.225558	0.123144	0.0074171	0.131969	0.165141	0.17402	0.125282	0.253277	0.28258	0.277505	0.284492	0.264951
43.935	0.255867	0.225963	0.123581	0.0074171	0.132992	0.165141	0.17402	0.125732	0.253277	0.283918	0.277856	0.284492	0.265329
43.956	0.256245	0.225963	0.123581	0.0069808	0.133504	0.165141	0.17402	0.126183	0.253662	0.285256	0.278206	0.284149	0.265708
43.978	0.256624	0.226369	0.124017	0.0065445	0.134015	0.165141	0.17402	0.126634	0.253662	0.286326	0.278907	0.283807	0.266086
44	0.257002	0.226775	0.124017	0.0065445	0.135038	0.165141	0.17402	0.127084	0.253662	0.287664	0.279257	0.283807	0.266843
44.022	0.257381	0.226775	0.124454	0.0061082	0.13555	0.165141	0.17402	0.127535	0.254048	0.289002	0.279958	0.283465	0.267222
44.044	0.257759	0.227181	0.124454	0.0061082	0.136061	0.165141	0.17402	0.128436	0.254048	0.290072	0.280308	0.283465	0.2676
44.065	0.258138	0.227586	0.124891	0.0056719	0.137084	0.165141	0.17402	0.128887	0.254048	0.29141	0.281009	0.283122	0.267979
44.087	0.258516	0.227992	0.125328	0.0056719	0.137596	0.165141	0.174428	0.129788	0.254433	0.292748	0.28171	0.283122	0.268736
44.109	0.258895	0.227992	0.125328	0.0056719	0.138619	0.165557	0.174428	0.130239	0.254433	0.294086	0.28206	0.28278	0.269114
44.131	0.259273	0.228398	0.125764	0.0052356	0.13913	0.165557	0.174428	0.13114	0.254819	0.295157	0.282761	0.28278	0.269493
44.152	0.259652	0.228803	0.126201	0.0052356	0.139642	0.165557	0.174428	0.131591	0.254819	0.296495	0.283462	0.282438	0.269871
44.174	0.26003	0.229209	0.126201	0.0052356	0.140665	0.165973	0.174837	0.132492	0.254819	0.297832	0.284163	0.282438	0.270628
44.196	0.260409	0.229615	0.126638	0.0052356	0.141176	0.165973	0.174837	0.133393	0.255204	0.29917	0.284863	0.282095	0.271007
44.218	0.260787	0.23002	0.127074	0.0052356	0.142199	0.166389	0.175245	0.134295	0.255204	0.300241	0.285564	0.282095	0.271385
44.24	0.261544	0.230426	0.127511	0.0052356	0.142711	0.166389	0.175245	0.135196	0.255204	0.301579	0.286265	0.281753	0.272142
44.261	0.261923	0.230832	0.127948	0.0052356	0.143734	0.166805	0.175654	0.136097	0.25559	0.302917	0.286966	0.281753	0.272521
44.283	0.262301	0.231237	0.127948	0.0052356	0.144246	0.167221	0.175654	0.136999	0.25559	0.304255	0.287666	0.281753	0.272899
44.305	0.26268	0.231643	0.128384	0.0052356	0.144757	0.167221	0.176062	0.1379	0.255975	0.305325	0.288367	0.28141	0.273656
44.327	0.263058	0.232049	0.128821	0.0052356	0.14578	0.167637	0.176471	0.138801	0.255975	0.306663	0.289068	0.28141	0.274035
44.348	0.263437	0.232454	0.129258	0.0056719	0.146292	0.168053	0.176471	0.139703	0.255975	0.308001	0.290119	0.28141	0.274413
44.37	0.263815	0.23286	0.129694	0.0056719	0.147315	0.168469	0.176879	0.141055	0.256361	0.309339	0.29082	0.281068	0.274792
44.392	0.264572	0.233671	0.130131	0.0056719	0.147826	0.168885	0.177288	0.141956	0.256361	0.310409	0.291521	0.281068	0.275549
44.414	0.264951	0.234077	0.130568	0.0061082	0.148849	0.169301	0.177696	0.142857	0.256361	0.311747	0.292221	0.281068	0.275927
44.436	0.265329	0.234483	0.131004	0.0061082	0.149361	0.170133	0.178105	0.144209	0.256746	0.313085	0.293273	0.281068	0.276306
44.457	0.265708	0.234888	0.131441	0.0065445	0.149872	0.170549	0.178513	0.14511	0.256746	0.314156	0.293973	0.281068	0.277063
44.479	0.266086	0.235294	0.131878	0.0065445	0.150895	0.170965	0.178922	0.146462	0.257132	0.315494	0.295025	0.281068	0.277441
44.501	0.266843	0.2357	0.132314	0.0069808	0.151407	0.171797	0.17933	0.147814	0.257132	0.316564	0.295725	0.281068	0.278198
44.523	0.267222	0.236511	0.133188	0.0074171	0.15243	0.172213	0.179739	0.148716	0.257132	0.317902	0.296426	0.281068	0.278577
44.544	0.2676	0.236917	0.133624	0.0078534	0.152941	0.173045	0.180556	0.150068	0.257517	0.31924	0.297477	0.281068	0.278955
44.566	0.267979	0.237323	0.134061	0.0078534	0.153964	0.173461	0.180964	0.15142	0.257517	0.32031	0.298178	0.281068	0.279712
44.588	0.268736	0.238134	0.134498	0.0082897	0.154476	0.174293	0.181373	0.152772	0.257903	0.321648	0.299229	0.281068	0.280091
44.61	0.269114	0.23854	0.134934	0.008726	0.154987	0.175125	0.18219	0.154123	0.257903	0.322719	0.29993	0.281068	0.280469
44.632	0.269493	0.238945	0.135371	0.0091623	0.15601	0.175541	0.182598	0.155025	0.258288	0.324057	0.300981	0.281068	0.281226
44.653	0.269871	0.239351	0.136245	0.0095986	0.156522	0.176373	0.183415	0.156377	0.258288	0.325127	0.301682	0.281068	0.281605
44.675	0.270628	0.240162	0.136681	0.0100349	0.157033	0.177205	0.183824	0.158179	0.258674	0.326197	0.302733	0.28141	0.281983
44.697	0.271007	0.240568	0.137118	0.0104712	0.158056	0.178037	0.184641	0.159531	0.258674	0.327535	0.303784	0.28141	0.28274
44.719	0.271385	0.241379	0.137555	0.0109075	0.158568	0.178869	0.185458	0.160883	0.259059	0.328606	0.304485	0.28141	0.283119
44.74	0.272142	0.241785	0.137991	0.0117801	0.159591	0.1797	0.186275	0.162235	0.259059	0.329676	0.305536	0.281753	0.283497
44.762	0.272521	0.242191	0.138865	0.0122164	0.160102	0.180532	0.186683	0.163587	0.259445	0.331014	0.306237	0.281753	0.283876
44.784	0.272899	0.243002	0.139301	0.0126527	0.160614	0.18178	0.1875	0.164939	0.259445	0.332085	0.307288	0.282095	0.284633
44.806	0.273656	0.243408	0.139738	0.013089	0.161637	0.182612	0.188317	0.166742	0.25983	0.333155	0.307989	0.282095	0.285011
44.828	0.274035	0.243813	0.140611	0.0139616	0.162148	0.183444	0.189134	0.168094	0.25983	0.334225	0.30904	0.282095	0.28539
44.849	0.274413	0.244625	0.141048	0.0143979	0.16266	0.184692	0.189951	0.169446	0.260216	0.335296	0.309741	0.282438	0.286147
44.871	0.274792	0.24503	0.141485	0.0152705	0.163683	0.185524	0.191176	0.171248	0.260601	0.336366	0.310792	0.28278	0.286525
44.893	0.275549	0.245842	0.142358	0.0157068	0.164194	0.186356	0.191993	0.1726	0.260601	0.337436	0.311493	0.28278	0.286904
44.915	0.275927	0.246247	0.142795	0.0161431	0.165217	0.187604	0.19281	0.173952	0.260987	0.338507	0.312193	0.283122	0.287282
44.936	0.276306	0.247059	0.143231	0.0170157	0.165729	0.188436	0.194036	0.175755	0.261372	0.339577	0.313245	0.283122	0.287661
44.958	0.277063	0.247465	0.143668	0.0178883	0.16624	0.189684	0.194853	0.177107	0.261758	0.340648	0.313945	0.283465	0.288418
44.98	0.277441	0.24787	0.144541	0.0183246	0.167263	0.190932	0.19567	0.178909	0.261758	0.341718	0.314646	0.283807	0.288796
45.002	0.278198	0.248682	0.144978	0.0191972	0.167775	0.191764	0.196895	0.180261	0.262143	0.342788	0.315697	0.283807	0.289175
45.024	0.278577	0.249087	0.145415	0.0200698	0.168286	0.193012	0.198121	0.182064	0.262529	0.343591	0.316398	0.284149	0.289553
45.045	0.278955	0.249899	0.146288	0.0205061	0.169309	0.193844	0.198938	0.183416	0.262914	0.344661	0.317099	0.284149	0.289932
45.067	0.279712	0.250304	0.146725	0.0213787	0.169821	0.195092	0.200163	0.185219	0.2633	0.345732	0.3178	0.284492	0.29031
45.089	0.280091	0.25071	0.147598	0.0222513	0.170844	0.196339	0.201389	0.187021	0.2633	0.346535	0.318851	0.284834	0.290689
45.111	0.280469	0.251521	0.148035	0.0231239	0.171355	0.197587	0.202206	0.188373	0.263685	0.347605	0.319552	0.285176	0.291067
45.132	0.281226	0.251927	0.148472	0.0235602	0.172379	0.198419	0.203431	0.190176	0.264071	0.348408	0.320252	0.285176	0.291446
45.154	0.281605	0.252738	0.149345	0.0244328	0.17289	0.199667	0.204657	0.191528	0.264456	0.349478	0.320953	0.285519	0.291824
45.176	0.281983	0.253144	0.149782	0.0253054	0.173913	0.200915	0.205882	0.19333	0.264842	0.350281	0.321654	0.285861	0.292203
45.198	0.28274	0.253955	0.150218	0.026178	0.174425	0.202163	0.207108	0.195133	0.265227	0.351084	0.322355	0.285861	0.292581
45.22	0.283119	0.254361	0.151092	0.0270506	0.175448	0.203411	0.208333	0.196485	0.265613	0.352154	0.323055	0.286203	0.29296
45.241	0.283497	0.254767	0.151528	0.0279232	0.175959	0.204659	0.209559	0.198288	0.265998	0.352957	0.323406	0.286546	0.293338
45.263	0.283876	0.255578	0.151965	0.0287958	0.176982	0.205491	0.210784	0.199639	0.266384	0.35376	0.324107	0.286546	0.293717
45.285	0.284633	0.255984	0.152838	0.0296684	0.177494	0.206739	0.212418	0.201442	0.266769	0.354562	0.324807	0.286888	0.294095
45.307	0.285011	0.256389	0.153275	0.030541	0.178517	0.207987	0.213644	0.203245	0.267155	0.355633	0.325508	0.28723	0.294095
45.328	0.28539	0.257201	0.154148	0.0318499	0.179028	0.209235	0.214869	0.204597	0.267926	0.356436	0.325858	0.28723	0.294474
45.35	0.286147	0.257606	0.154585	0.0327225	0.180051	0.210483	0.216095	0.206399	0.268311	0.357238	0.326559	0.287573	0.294852
45.372	0.286525	0.258418	0.155022	0.0335951	0.181074	0.21173	0.217729	0.207751	0.268697	0.358041	0.32691	0.287915	0.295231
45.394	0.286904	0.258824	0.155895	0.0344677	0.181586	0.212978	0.218954	0.209554	0.269082	0.358844	0.32761	0.287915	0.295231
45.416	0.287282	0.259229	0.156332	0.0357766	0.182609	0.21381	0.22018	0.210906	0.269468	0.359647	0.327961	0.288257	0.295609
45.437	0.287661	0.260041	0.157205	0.0366492	0.183632	0.215058	0.221814	0.212708	0.269854	0.360182	0.328662	0.2886	0.295988
45.459	0.288418	0.260446	0.157642	0.0375218	0.184655	0.216306	0.223039	0.214511	0.270625	0.360985	0.329012	0.2886	0.295988
45.481	0.288796	0.260852	0.158079	0.0388307	0.185166	0.217554	0.224673	0.215863	0.27101	0.361788	0.329362	0.288942	0.296366
45.503	0.289175	0.261258	0.158952	0.0397033	0.186189	0.218386	0.225899	0.217666	0.271396	0.36259	0.329713	0.289284	0.296366
45.525	0.289553	0.262069	0.159389	0.0410122	0.187212	0.219634	0.227533	0.219018	0.272167	0.363126	0.330413	0.289284	0.296745
45.546	0.289932	0.262475	0.160262	0.0418848	0.188235	0.220882	0.228758	0.22082	0.272552	0.363928	0.330764	0.289627	0.296745
45.568	0.29031	0.26288	0.160699	0.0431937	0.189258	0.22213	0.230392	0.222172	0.272938	0.364731	0.331114	0.289627	0.297123
45.59	0.290689	0.263692	0.161572	0.0440663	0.190281	0.222962	0.231618	0.223975	0.273709	0.365266	0.331465	0.289969	0.297123
[truncated: 1,580 more rows]
