# Supplementary material for: Drug targeting Nsp1-ribosomal complex shows antiviral activity against SARS-CoV-2
Source: eLife journal article supplement (doi:10.7554/elife.74877), 2022-03-24
Supplement: supp [file Figure 1-supplement 2 source data_1_RMSF_average hydrogen bonds.xlsx]

## Sheet: Montelukast
		RMSF
Amino acids	Replica_1	Replica_2	Replica_3
148	0.7002	0.5084	0.3795
149	0.5386	0.3541	0.3128
150	0.3918	0.2932	0.2844
151	0.3346	0.2424	0.2534
152	0.3003	0.2056	0.2063
153	0.3569	0.2379	0.2819
154	0.3785	0.2591	0.2746
155	0.3087	0.241	0.2043
156	0.2202	0.2201	0.1433
157	0.2407	0.2541	0.1616
158	0.2842	0.2451	0.1575
159	0.2756	0.202	0.1672
160	0.2422	0.153	0.1673
161	0.2934	0.152	0.2087
162	0.312	0.1939	0.2149
163	0.2613	0.2156	0.2119
164	0.3391	0.2048	0.2486
165	0.3945	0.1925	0.3033
166	0.3641	0.2636	0.346
167	0.429	0.3404	0.3336
168	0.4316	0.3856	0.3369
169	0.3877	0.3453	0.3311
170	0.2822	0.2752	0.3017
171	0.2533	0.2758	0.2939
172	0.2759	0.293	0.3136
173	0.2539	0.2908	0.31
174	0.2163	0.2615	0.2847
175	0.306	0.2967	0.3147
176	0.3584	0.3391	0.3405
177	0.3482	0.3742	0.3283
178	0.4112	0.4186	0.4078
179	0.5819	0.5722	0.5606
180	0.806	0.801	0.7882

## Sheet: Saquinavir
		RMSF
Amino acids	Replica_1	Replica_2	Replica_3
148	0.3858	0.645	0.5199
149	0.3033	0.4765	0.3853
150	0.278	0.368	0.3876
151	0.3402	0.3814	0.3841
152	0.3456	0.4099	0.4054
153	0.3942	0.385	0.497
154	0.4197	0.5197	0.5748
155	0.3855	0.5447	0.5387
156	0.2779	0.4124	0.3914
157	0.2561	0.4132	0.3537
158	0.3257	0.5634	0.4534
159	0.3352	0.5611	0.5148
160	0.2731	0.5227	0.4768
161	0.2938	0.4311	0.4918
162	0.3926	0.4713	0.4436
163	0.4053	0.484	0.4904
164	0.3782	0.42	0.5045
165	0.397	0.5144	0.465
166	0.3702	0.5219	0.4732
167	0.3502	0.3981	0.4669
168	0.3191	0.376	0.4457
169	0.3197	0.3112	0.401
170	0.2241	0.2418	0.3825
171	0.2057	0.3151	0.4138
172	0.3033	0.4327	0.39
173	0.3089	0.4167	0.3757
174	0.2649	0.429	0.481
175	0.3947	0.5967	0.6796
176	0.4463	0.7316	0.8037
177	0.4833	0.8482	0.8181
178	0.5546	0.8968	0.9312
179	0.6602	0.9687	1.053
180	0.7833	1.1016	1.2276

## Sheet: Average hydrogen bonds
	Replica1	Replica2
Nsp1_C ter	19.354	20.272
Montelukast	23.384	24.035
Saquinavir	26.564	23..439
