# Supplementary material for: Drug targeting Nsp1-ribosomal complex shows antiviral activity against SARS-CoV-2
Source: eLife journal article supplement (doi:10.7554/elife.74877), 2022-03-24
Supplement: supp [file Figure 2 source data_translational rescue and RT-PCR data.xlsx]

## Sheet: Fluc-activity-Montelukast
pcDNA (3.1) empty	FLuc+pcDNA (3.1) empty	FLuc+pcDNA-Nsp1	FLuc+pcDNA-Nsp1+Drug 50nM	FLuc+pcDNA-Nsp1+Drug 500nM	FLuc+pcDNA-Nsp1+Drug 1000nM	FLuc+pcDNA-Nsp1+Drug 1500nM	FLuc+pcDNA-Nsp1+Drug 2000nM
18	2500	1520	1740	1650	1950	2390	2440
15	2540	1670	1790	1420	1550	1660	3080
16	2370	1750	1710	1670	1550	2140	2060

## Sheet: Fluc-activity-Saquinavir
pcDNA (3.1) empty	FLuc+pcDNA (3.1) empty	FLuc+pcDNA-Nsp1	FLuc+pcDNA-Nsp1+Drug 50nM	FLuc+pcDNA-Nsp1+Drug 500nM	FLuc+pcDNA-Nsp1+Drug 1000nM	FLuc+pcDNA-Nsp1+Drug 1500nM	FLuc+pcDNA-Nsp1+Drug 2000nM
15	2140	1180	924	919	781	828	745
16	1800	977	953	651	733	729	737
14	1880	910	656	925	558	678	633

## Sheet: RT-PCR_Montelukast
pcDNA (3.1) empty	FLuc+pcDNA (3.1) empty	FLuc+pcDNA-Nsp1	FLuc+pcDNA-Nsp1+Drug 50nM	FLuc+pcDNA-Nsp1+Drug 500nM	FLuc+pcDNA-Nsp1+Drug 1000nM	FLuc+pcDNA-Nsp1+Drug 1500nM	FLuc+pcDNA-Nsp1+Drug 2000nM
0.51931	1.35789	1.01046	1.08863	0.931989	0.887578	1.44524	1.02355
0.100841	0.849913	0.687242	0.753723	0.754206	1.11129	0.936085	1.6067
0.164223	0.992199	0.825928	1.22373	1.17689	0.60152	0.69528	0.935026

## Sheet: RT-PCR_Saquinavir
pcDNA (3.1) empty	FLuc+pcDNA (3.1) empty	FLuc+pcDNA-Nsp1	FLuc+pcDNA-Nsp1+Drug 50nM	FLuc+pcDNA-Nsp1+Drug 500nM	FLuc+pcDNA-Nsp1+Drug 1000nM	FLuc+pcDNA-Nsp1+Drug 1500nM	FLuc+pcDNA-Nsp1+Drug 2000nM
0.211854	0.978968	0.788472	0.51797	0.680623	0.800701	0.895439	0.802084
0.188892	0.967822	0.883011	0.827103	0.822691	0.964533	0.694127	0.875705
0.205296	1.05321	0.964364	0.913356	0.916865	0.854722	0.746533	0.984311
