# Supplementary material for: Drug targeting Nsp1-ribosomal complex shows antiviral activity against SARS-CoV-2
Source: eLife journal article supplement (doi:10.7554/elife.74877), 2022-03-24
Supplement: supp [file Figure 3 source data 1_RT PCR.xlsx]

## Sheet: Montelukast HEK ACE2_RT PCR
	Log10 copy number Viral RNA per mg total RNA
Control	8.221	8.11998	7.68801
5uM	8.572	7.85399	7.37414
10uM	8.481	7.41964	7.372

## Sheet: Montelukast VERO E6_RT PCR
	Log10 copy number Viral RNA per mg total RNA
Control	9.36941	8.90638	8.46263
5uM	9.29485	8.84063	8.53293
10uM	9.31824	8.98829	8.34923
