# Supplementary material for: Drug targeting Nsp1-ribosomal complex shows antiviral activity against SARS-CoV-2
Source: eLife journal article supplement (doi:10.7554/elife.74877), 2022-03-24
Supplement: supp [file Figure 3 source data 2_Plaque assay.xlsx]

## Sheet: Montelukast HEK ACE2 Plaque
381000000	251000000	151000000
361000000	271000000	191000000

## Sheet: Monetlukast VERO E6 Plaque
631000000	341000000	321000000
731000000	311000000	281000000
