# Supplementary material for: Drug targeting Nsp1-ribosomal complex shows antiviral activity against SARS-CoV-2
Source: eLife journal article supplement (doi:10.7554/elife.74877), 2022-03-24
Supplement: supp [file Figure 3-supplement 1-source data_Toxicity assay.xlsx]

## Sheet: Montelukast HEK ACE2
Cell control	5µM	10µM	20µM
104.4	93	95.5	96.9
101.9	95.9	97.4	93.1
102.6	92.8	95.8	95.2

## Sheet: Saquinavir HEK ACE2
Cell control	5µM	10µM	20µM
100.622	94.5778	91.2593	99.3778
102.044	96	98.0741	89.4222
99.1407	99.0815	99.2	94.6963

## Sheet: Montelukast Vero E6
Cell control	5µM	10µM	20µM
102.299	95.693	94.2357	23.8018
101.376	99.1418	104.922	26.2306
96.3245	94.9158	96.6645	15.544

## Sheet: Saquinavir Vero E6
Cell control	5µM	10µM	20µM
96.1832	102.338	99.8092	36.021
101.765	93.5592	89.5515	43.3683
102.052	94.7519	91.4122	41.3645
