# Supplementary material for: Drug targeting Nsp1-ribosomal complex shows antiviral activity against SARS-CoV-2
Source: eLife journal article supplement (doi:10.7554/elife.74877), 2022-03-24
Supplement: supp [file Figure 3-supplement 2 sorce data 2_RT PCR.xlsx]

## Sheet: Saquinavir HEK ACE2_RT PCR
Virus control	5uM	10uM
8.221	8.43973	8.02758
8.572	8.39557	7.94881
8.481	8.07773	7.56509

## Sheet: Saquinavir VER E6_RT PCR
Virus control	5uM	10uM
9.36941	9.15416	9.20189
9.29485	9.18104	9.14043
9.31824	9.1014	9.15481
