# Supplementary material for: Drug targeting Nsp1-ribosomal complex shows antiviral activity against SARS-CoV-2
Source: eLife journal article supplement (doi:10.7554/elife.74877), 2022-03-24
Supplement: supp [file Figure 3-supplement 2-source data 3_Plaque assay.xlsx]

## Sheet: Saquinavir HEK ACE2_Plaque assa
Virus control	5uM	10uM
381000000	321000000	331000000
361000000	361000000	351000000

## Sheet: Saquinavir VERO E6_Plaque assay
Virus control	5uM	10uM
631000000	591000000	541000000
731000000	631000000	581000000
